# Supplementary material
Source: PubMed Central journal article supplement (PMC4737927)
Supplement: ismej2015116x1.pdf [file ismej2015116x1.pdf]

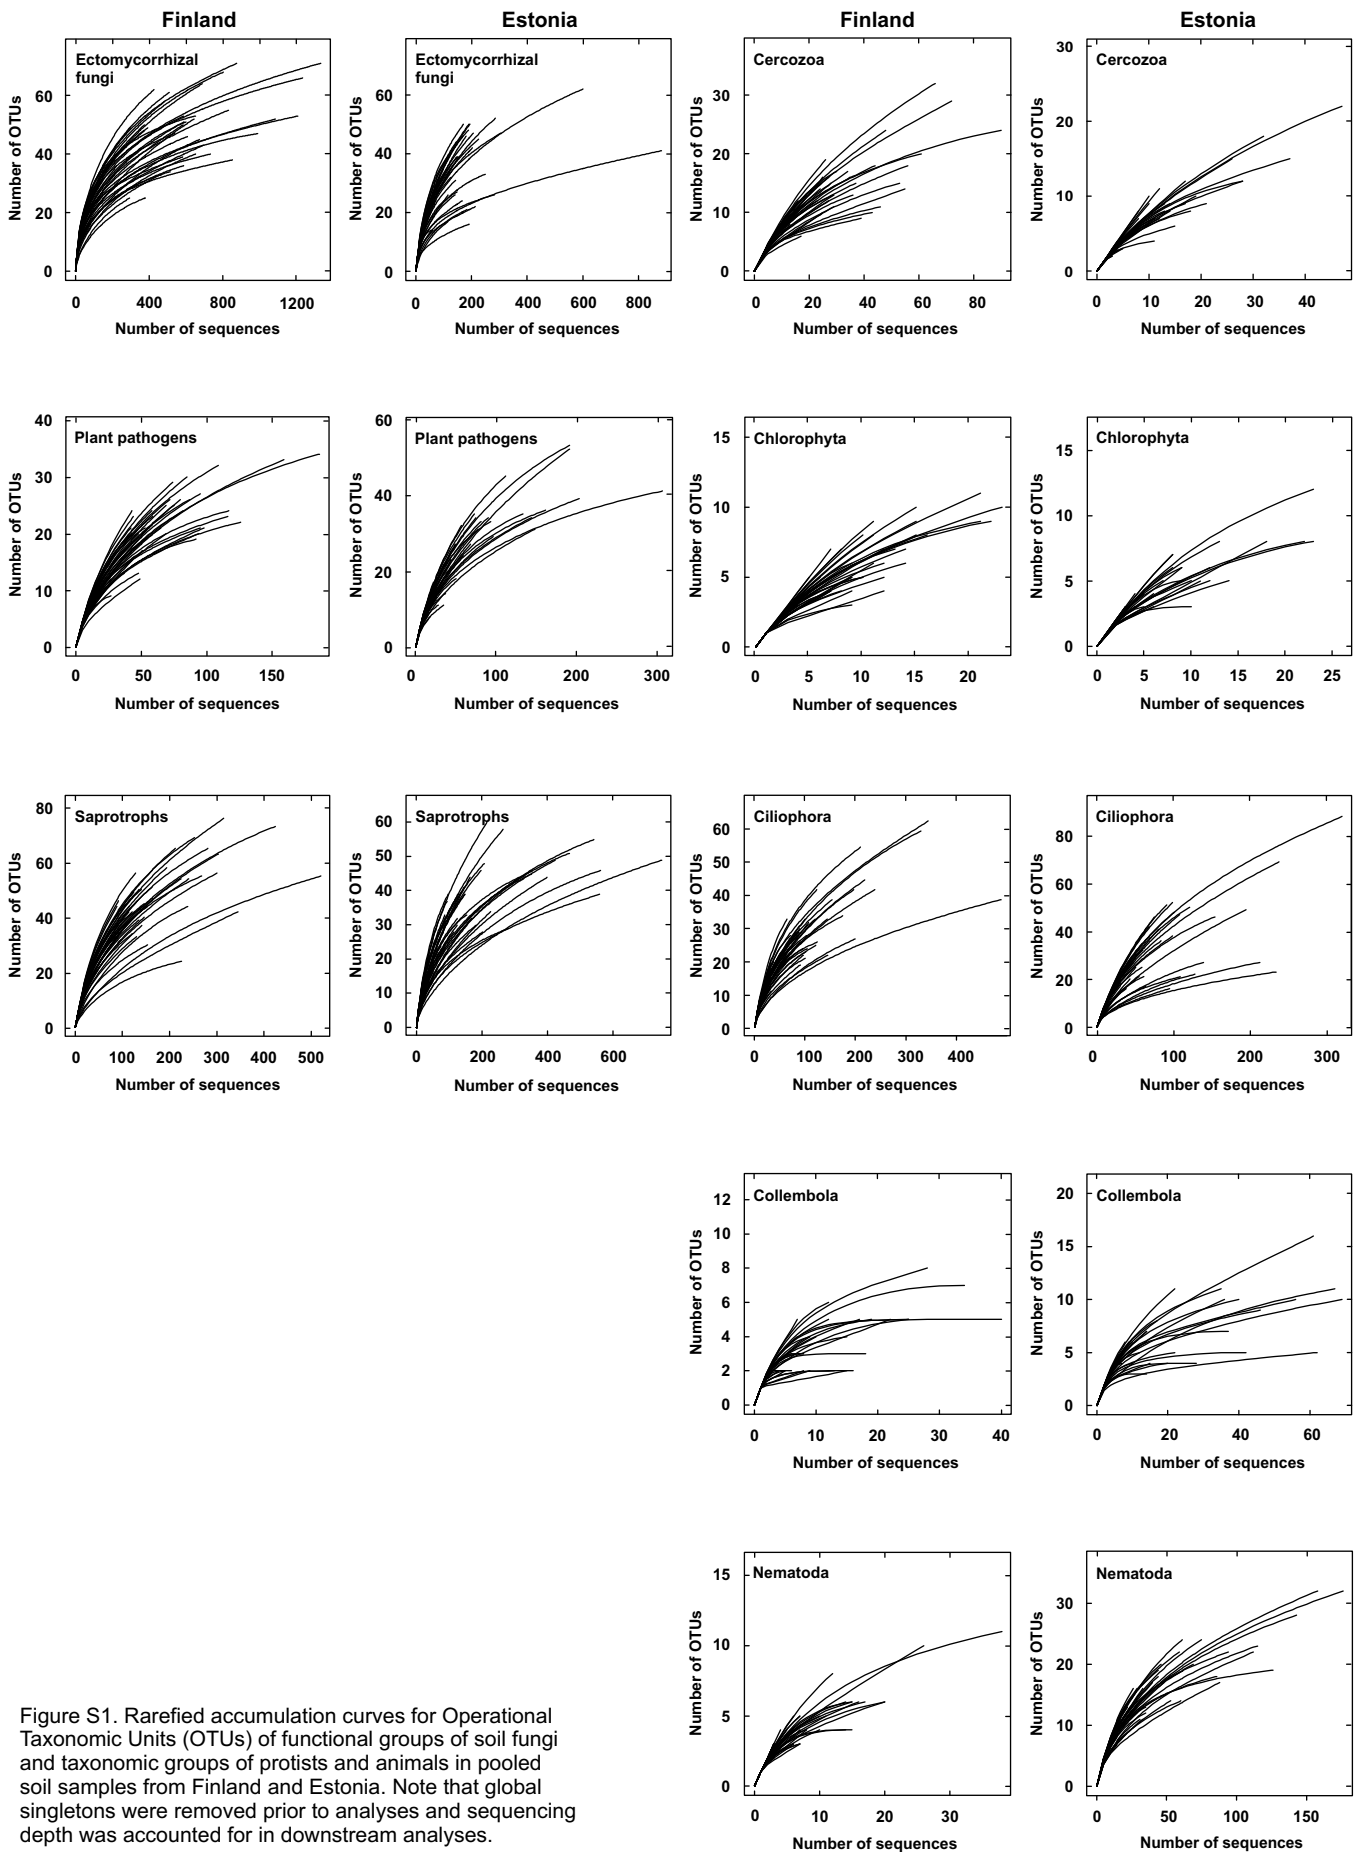

Figure S1. Rarefied accumulation curves for Operational Taxonomic Units (OTUs) of functional groups of soil fungi and taxonomic groups of protists and animals in pooled soil samples from Finland and Estonia. Note that global singletons were removed prior to analyses and sequencing depth was accounted for in downstream analyses.
