# Supplementary material
Source: PubMed Central journal article supplement (PMC4737927)
Supplement: ismej2015116x2.pdf [file ismej2015116x2.pdf]

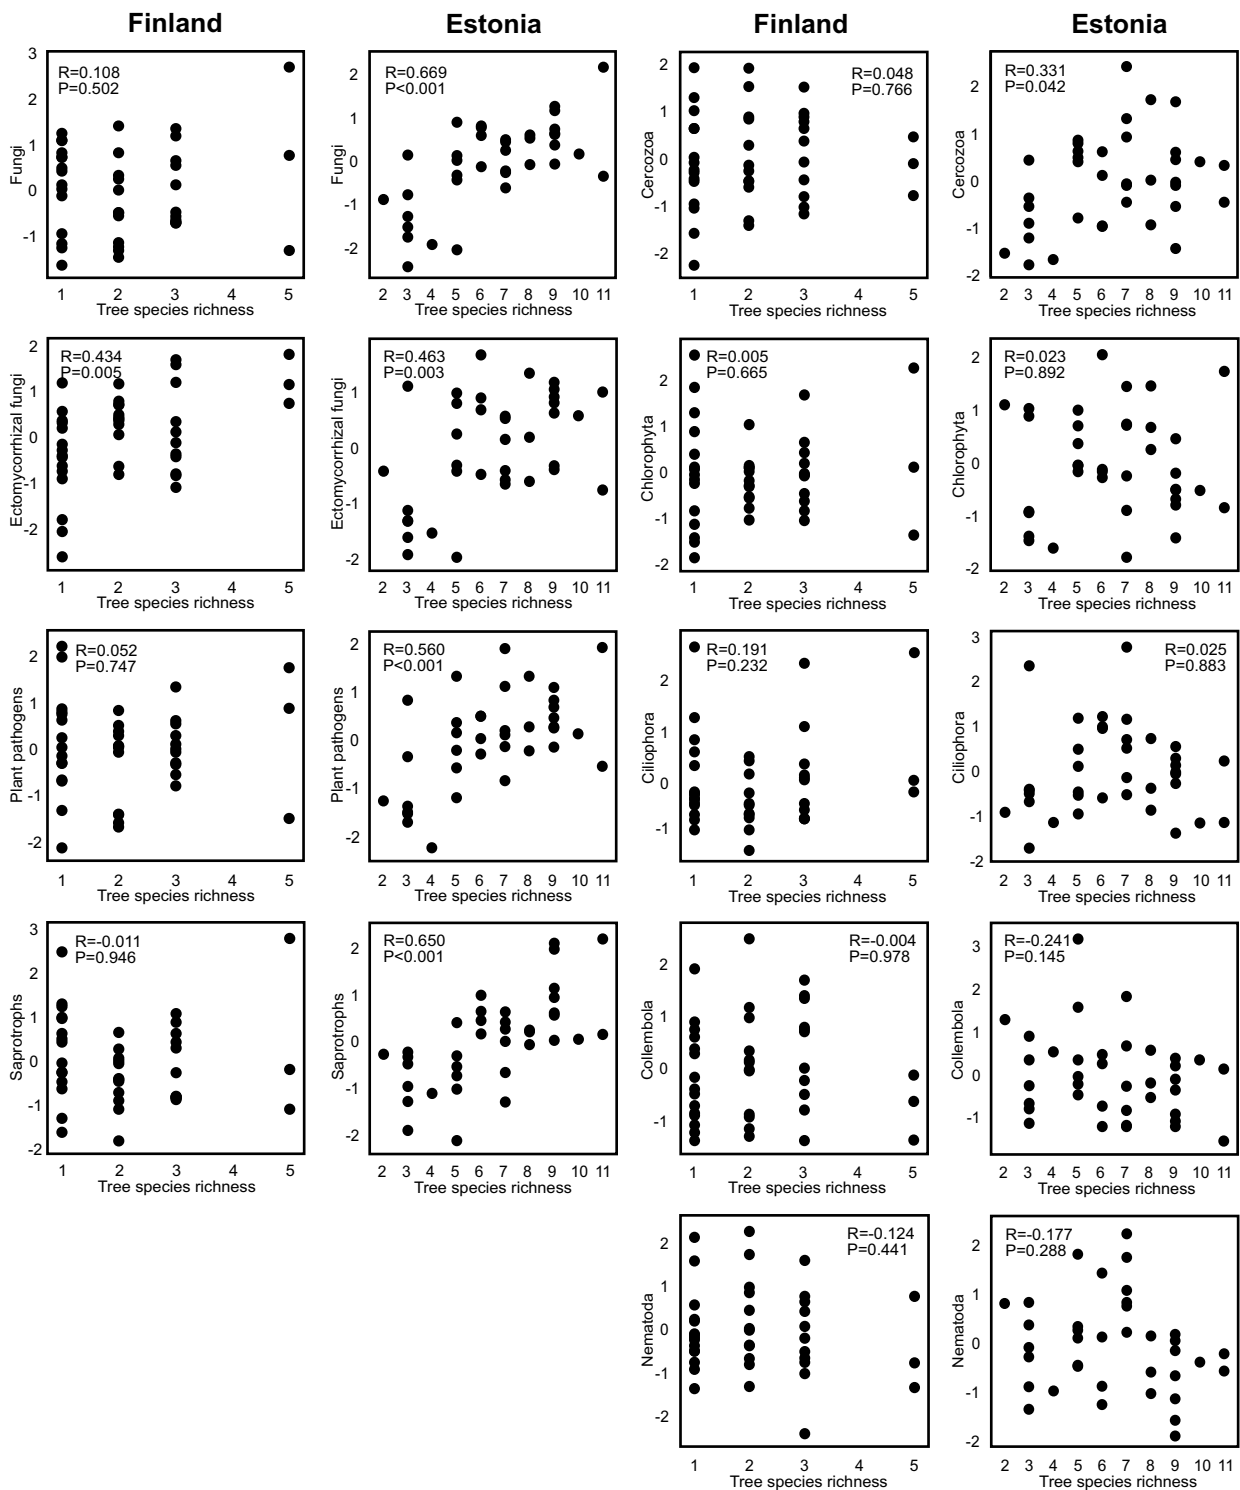

Figure S2. Pearson correlations between tree species richness and residual richness of soil biota accounting for differences in sequencing depth. The first and third columns represent samples from Finland, while the second and fourth column represent Estonian samples. Note that most of these relationships are non-significant after taking into account the strongest predictors based on model selection.
