# Supplementary material
Source: PubMed Central journal article supplement (PMC4737927)
Supplement: ismej2015116x3.pdf [file ismej2015116x3.pdf]

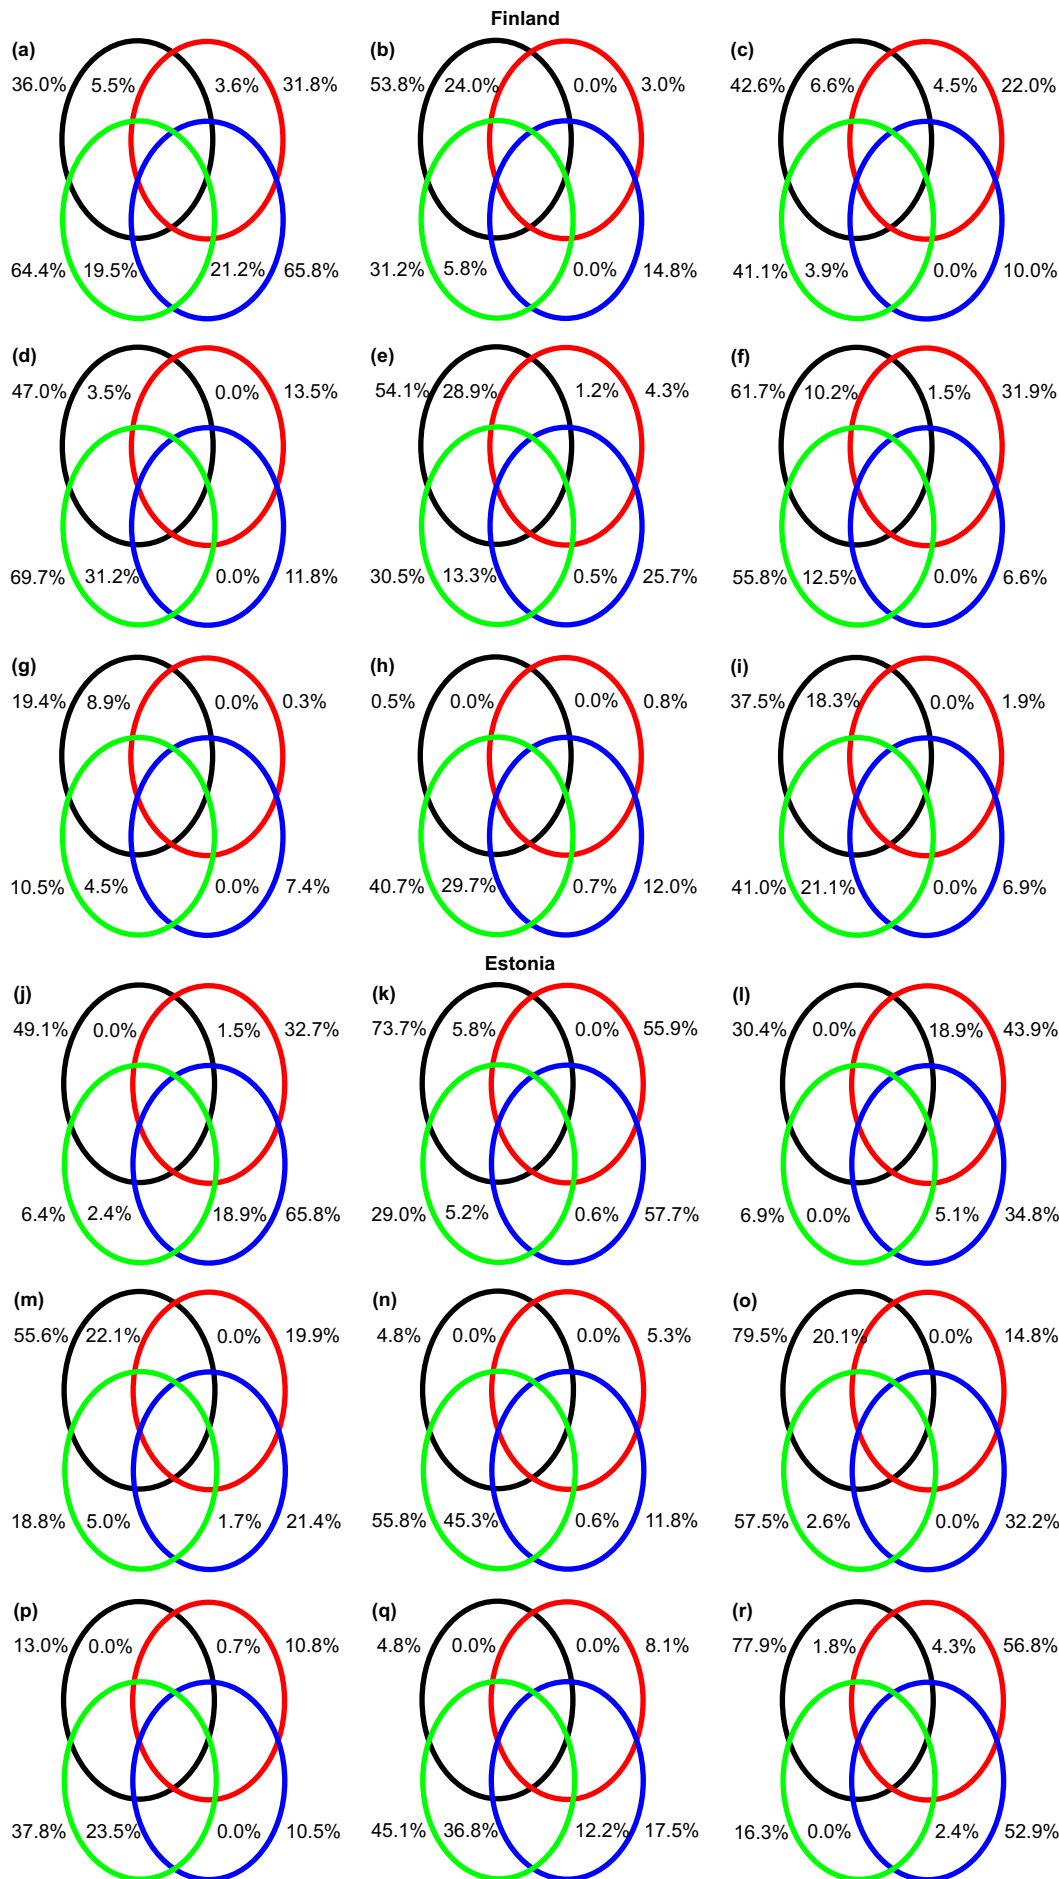

Figure S3. Variation partitioning analysis estimating unique (numbers in circles) and total (including shared; numbers outside circles) effects of vegetation and soil parameters combined (black circles), tree diversity (red circles), tree species (blue circles) and spatial structure (green circles) in Finland (a-i) and Estonia (j-r). (a, j) ectomycorrhizal fungi; (b, k) plant pathogenic fungi; (c, l) saprotrophic fungi; (d, m) Cercozoa; (e, n) Chlorophyta; (f, o) Ciliophora; (g, p) Collembola; (h, q) Nematoda; (i, r) understorey vegetation.
