# Supplementary material
Source: PubMed Central journal article supplement (PMC4737927)
Supplement: ismej2015116x4.pdf [file ismej2015116x4.pdf]

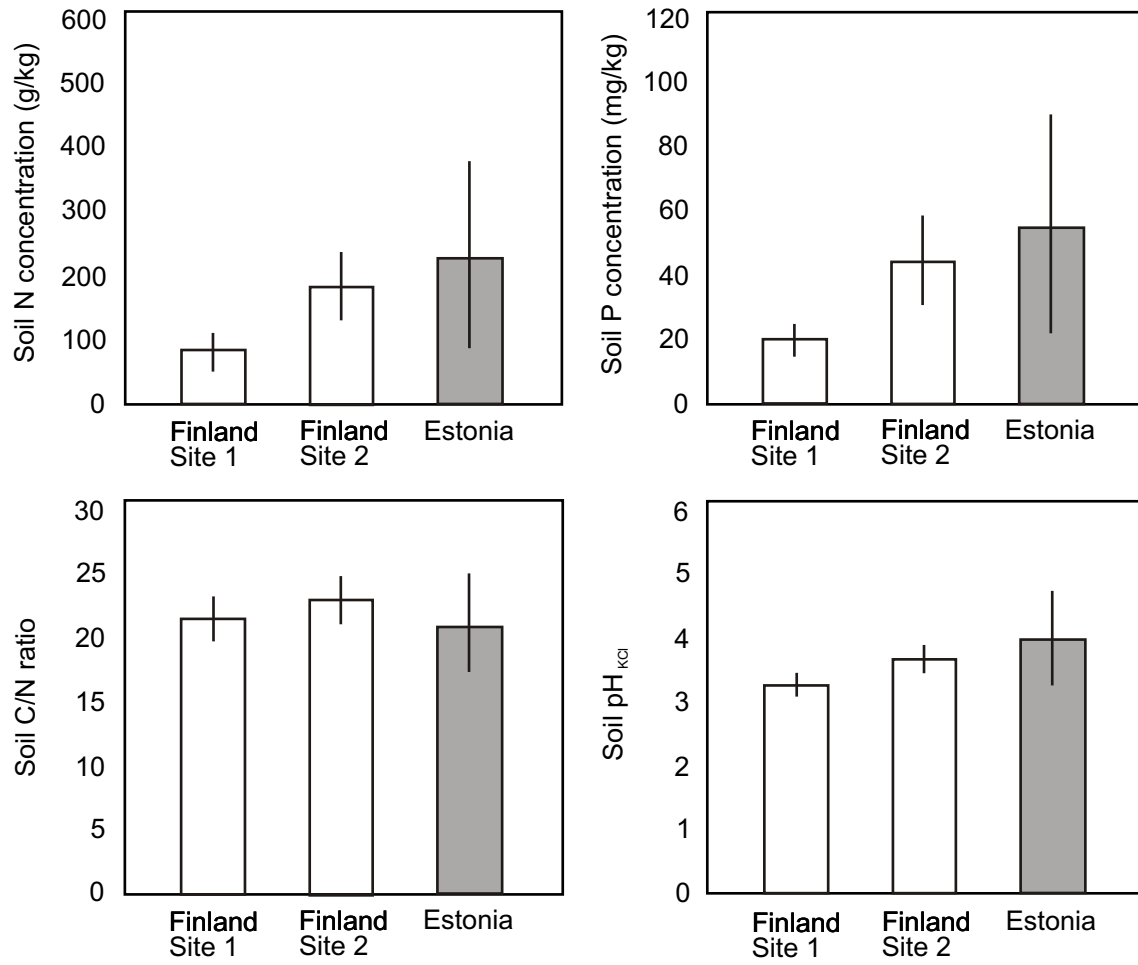

Figure S4. Average soil nutrient concentrations and pH in the two Finnish sites and in Estonia. Error bars denote standard deviation.
