# Supplementary material
Source: PubMed Central journal article supplement (PMC4737927)
Supplement: ismej2015116x6.pdf [file ismej2015116x6.pdf]

|      |     |      |    |             |   |                                                                                         |
|------|-----|------|----|-------------|---|-----------------------------------------------------------------------------------------|
| 2014 | 0   |      |    |             | r | Bahram M, Harend H, Tedersoo L. 2014. Network perspectives of ectomycorrhizal           |
|      |     |      |    |             | r | Garrett KA, Thomas-Sharma S, Forbes GA, Nopsa JH. 2014. Climate change and pl           |
|      |     |      |    |             | r | Hiiesalu I. 2014. Mullaseente ja ripsloomade mitmekesisuse mustriid niiskusgradieni     |
| 2013 | 2   | x    | 11 |             | x | Kõljalg U, Nilsson RH, Abarenkov K, Tedersoo L, Taylor AFS, Bahram M et al. 20          |
| 2015 | 0   | 10   |    |             | r | Mayor J, Bahram M, Henkel T, Buegger F, Pritsch K, Tedersoo L. 2015. Ectomycor          |
|      |     | p/cd |    |             | x | Õpik M, Metsis M, Daniell TJ, Zobel M, Moora M. 2009. Large-scale parallel 454 :        |
|      |     |      |    |             | r | Suzuki N, Rivero RM, Shulaev V, Blumwald E, Mittler R. 2014. Abiotic and biotic         |
| 2015 |     | y    |    |             | r | Tedersoo L, Anslan S, Bahram M, Põlme S, Riit T, Liiv I, Kõljalg U, Kisand V, Nil       |
| 2015 |     |      |    |             | r | Tedersoo L, Bahram M, Cajthaml T, Põlme S, Hiiesalu I, Anslan S, Harend H, Bueg         |
| 2014 | 8   | 1    |    | Tedersoo, I | x | Tedersoo L, Bahram M, Põlme S, Kõljalg U, Yorou NS, Wijesundera R, Villarreal-I         |
| x    |     |      |    |             | r | Tedersoo L, Naadel T. 2011. Trühvleid kasvab ka Eestis [Truffles that grow in Estor     |
| 2010 | 234 | 3    | x  |             | x | Tedersoo L, Nilsson RH, Abarenkov K, Jairus T, Sadam A, Saar I, Bahram M, Becl          |
|      |     | x    |    |             | r | Wardle DA. 2002. Communities and Ecosystems: Linking the Aboveground and Bel            |
| 2010 | 89  | x    |    |             | x | Abarenkov K, Nilsson RH, Larsson K-H, Alexander IJ, Eberhardt U, Erland S, Hoil         |
|      |     |      |    |             | x | Arfi Y, Buee M, Marchand C mangroovide lehtedes ja koores 454 baasil NC:                |
|      |     |      |    |             | x | Bellemain E, Carlsen T, Brochmann C, Coissac E, Taberlet P, Kauserud H. 2010. IT        |
|      |     | x    |    |             | x | Bengtsson-Palme J, Ryberg M, Hartmann M, Branco S, Wang Z, Godhe A, de Wit I            |
|      |     |      |    |             | x | Benita J, Oosting RS, Lok MC, Wise MJ, Humphery-Smith J. 2003. Regionalized G           |
|      |     |      |    |             | x | Bhattacharya D, Lutzoni F, Reeb V, Simon D, Nason J, Fernandez F. 2000. Widesp          |
|      |     |      |    |             | x | Blaalid R, Kumar S, Nilsson RH, Abarenkov K, Kirk PM, Kauserud H. 2013. ITS1-           |
|      |     |      |    |             | x | Blackwell M. 2011. The Fungi: 1, 2, 3 ... 5.1 million species? Am. J. Bot. 98: 426-4    |
|      |     |      |    |             | x | Borneman J, Hartin RJ. 2000. PCR primers that amplify fungal rRNA genes from en         |
|      |     |      |    |             | x | Castro HF, Classen AT, Ausseened vs CO2, temp tõus, induts pöud: ohttrus                |
|      |     |      |    |             | x | Cavender-Bares J, Hozak KH, Fine PVA, Kembel SW. 2009. The merging of comm              |
|      |     | x    |    |             | x | Colwell RK. 2013. EstimateS: Statistical estimation of species richness and shared s    |
|      |     | x    |    |             | x | Edgar RC, Haas BJ, Clemente JC, Quince C, Knight R. 2011. UCHIME improves s             |
|      |     | x    |    |             | x | Fu L, Niu B, Zhu Z, Wu S, Li W. 2012. CD-HIT: accelerated for clustering the next       |
|      |     |      |    |             | x | Hildebrand F, Tadeo R, Voigt AY, Bork P, Raes J. 2014. LotuS: an efficient and use      |
|      |     |      |    |             | x | Hopple JS, Vilgalys R. 1994. Phylogenetic relationships among coprinoid taxa and al     |
|      |     |      |    |             | x | Kohout P, Sudova R, Janouskova M, Ctvrtlikova M, Hejda M, Pankova H, Slavikov           |
|      |     |      |    |             | x | Kopylova E, Noé L, Touzet H. 2012. SortMeRNA: Fast and accurate filtering of rib        |
|      |     |      |    |             | x | Larsson K-H, Larsson E, Kõljalg U. 2004. High phylogenetic diversity among cortic       |
|      |     |      |    |             | x | Livermore JA, Mattes TE. 2013. Phylogenetic detection of novel Cryptomycota in a        |
|      |     |      |    |             | x | Masella AP, Bartram AK, Truszkowski JM, Brown DG, Neufeld JD. 2012. PANDA               |
|      |     |      |    |             | x | Nilsson RH, Ryberg M, Abarenkov K, Sjökvist E, Kristiansson E. 2009. The ITS re         |
|      |     |      |    |             | x | Nilsson RH, Tedersoo L, Ryberg M, Kristiansson E, Hartmann M, Unterseher M, Pr          |
|      |     |      |    |             | x | Oja J, Bahram M, Tedersoo L, Kull T, Kõljalg U. 2015. Temporal patterns of orchid       |
|      |     |      |    |             | x | Olesen JM, Jordano P. 2002. Geographic patterns in plant-pollinator mutualistic net     |
|      |     |      |    |             | x | Põlme S, Bahram M, Kõljalg U, Tedersoo L. 2014. Global biogeography of <i>Alnus</i> -a  |
|      |     |      |    |             | x | Porras-Alfaro A, Liu K-L, Kuske CR, Xie G. 2014. From genus to phylum: large sut        |
|      |     |      |    |             | x | Quast C, Pruesse E, Yilmaz P, Gerken J, Schweer T, Yarza P, Peplies J, Glöckner F       |
|      |     |      |    |             | x | Schloss PD, Westcott SL, Ryabin T, Hall JR, Hartmann M, Hollister EB, Lesniewsk         |
|      |     |      |    |             | x | Schoch CL, Seifert KA, Huhndorf S, Robert V, Spouge JL, Levesque CA, Chen W,            |
|      |     |      |    |             | x | Taylor DL, Hollingsworth TJ Alaskal. Seente ja taimede suhe konstantselt 17             |
|      |     |      |    |             | x | Tedersoo L, Jairus T, Horton BM, Abarenkov K, Suvi T, Saar I, Kõljalg U. 2008. Si       |
|      |     |      |    |             | x | Tedersoo L, Smith ME. 2013. Lineages of ectomycorrhizal fungi revisited: foraging       |
|      |     |      |    |             | x | Wang Q, Garrity GM, Tiedje JM, Cole JR. 2007. Naive Bayesian classifier for rapid       |
|      |     |      |    |             | x | Wang X-C, Liu C, Huang L, Bengtsson-Palme J, Chen H, Zhang J-H, Cai D, Li J-Q           |
|      |     |      |    |             | x | White TJ, Bruns TD, Lee SB, Taylor JW. 1990. Amplification and direct sequencing        |
|      |     |      |    |             | y | Turenne CY, Sanche SS, Hoban DJ, Karlowky JA, Kabani AM. 1999. Rapid identi             |
|      |     |      |    |             | y | Turner S, Pryer KM, Miao VPW, Palmer JD. 1999. Investigating deep phylogenetic          |
|      |     |      |    |             |   | Li YC, Feng B, Yang ZL. 2011. <i>Zangia</i> , a new genus of Boletaceae supported by r  |
|      |     |      |    |             |   | Aanen DK, Kuyper TW, Boekhout T, Hoekstra EF. 2000. Phylogenetic relationship:          |
|      |     |      |    |             |   | Aanen DK, Kuyper TW, Hoekstra RF. 2001. A widely distributed ITS polymorphis            |
|      |     |      |    |             |   | Aanen DK, Kuyper TW, Mes THM, Hoekstra RF. 2000. The evolution of reproduct             |
|      |     |      |    |             |   | Aanen DK, Kuyper TW. 2004. A comparison of the application of a biological and f        |
|      |     |      |    |             |   | Abadie J-C, Püttsep Ü, Gebauer G, Faccio A, Bonfante P, Selsosse M-A. 2006. <i>Ce</i>   |
| 2010 | 31  | x    |    |             |   | Abarenkov K, Tedersoo L, Nilsson RH, Vellak K, Saar I, Veldre V, Parmasto E, Pr         |
|      |     |      |    |             |   | Abraham W-R, Hesse C. 2003. Isotope fractionations in the biosynthesis of cell con      |
|      |     |      |    |             |   | Acinas S, Klepac-Ceraj V, Hunt SE, Pharino C, Ceraj I, Distel DL, Polz MF. 2004.        |
|      |     |      |    |             |   | Ackerly DD, Schwilk DW, Webb CO. 2006. Niche evolution and adaptive radiation           |
|      |     |      |    |             |   | Acsai J, Lar 55 morfotüübi kirjeldused: Arctostaphylos, Arbutus                         |
|      |     |      |    |             |   | Adamczyk J, Hesselsoe M, Iversen N, Horn M, Lehner A, Nielsen PH, Schloter M,           |
|      |     |      |    |             |   | Adams DH, Roth LF. 1967. Demarcation lines in paired cultures of <i>Fomes cajanderi</i> |
|      |     |      |    |             |   | Adams F, Reddell P, Webb MJ, Shipton WA. 2006. Arbuscular mycorrhiz Põhja-Al            |
|      |     |      |    |             |   | Addy HD, Piercey MM, Currah RS. 2005. Microfungal endophytes in roots. Can. J.          |
|      |     |      |    |             |   | Adis J. 1984. 'Seasonal igapõ' forests of Central Amazonian black-water rivers and      |
|      |     |      |    |             |   | Adl MS, Gupta VVSR. 2006. Protists in soil ecology and forest nutrient cycling. Ca      |
|      |     |      |    |             |   | Adl SM, Simpson AGB, Lane CE, Lukes J, Bass D, Bowser SS. 2012. The revised             |

cd  
B  
cd  
  
n  
p  
p/cd  
  
n  
p  
p  
p  
  
j  
j  
  
n  
  
p  
  
n  
p  
n  
n  
n  
  
j  
cd  
  
cd  
cd  
p/cd  
p/cd  
p  
p/cd  
p/cd  
  
p/cd  
p  
p  
p/cd  
  
p/cd  
VIITED  
  
p/cd  
cd  
j  
  
cd  
j  
cd

Adriaensen K, van der Lelie D, van Laere A, Vangronsveld J, Colpaert J. 2004. A zi  
Aerts R. 2002. The Role of Various Types of Mycorrhizal Fungi in Nutrient Cycling  
Agami M, Eshel A, Waisel Y. 1998. Plant recolonization after severe degradation: a  
Agerer R (ed). 1987-2006. Colour Atlas of Ectomycorrhizae. Einhorn-Verlag, Schw  
Agerer R K **Piceirhiza nigra** **Piceirhiza nigra**  
Agerer R, B Polyporoletus sublividus  
Agerer R, B **Descomyces EcM** -sarn Descolea ja Setchelliogaster -RM pole ja peage  
Agerer R, B Gomphus clavatus  
Agerer R, Beenken L. 1998. *Geastrum fimbriatum* Fr. + *Fagus sylvatica* L. Descr.  
Agerer R, B Lyophyllum decastes  
Agerer R, Bougher NL. 2001. *Amaurodon aquicoeruleus* (Thelephoraceae, Hymen  
Agerer R, B **Tomentella brun**neorufa eukalüptil: plektenh mantel ja tomentelloidsed l  
Agerer R, Bougher NL. 2001. *Tomentella subamyloidea* sp. Nov. And *T. radiosa* (C  
Agerer R, Christan J, Mays C, Hobbie EA. 2012. Isotopic signatures and trophic sta  
Agerer R, Göttlein A. 2003. Correlations between projection area of ectomycorrhiza  
Agerer R, Grote R, Raidl S. **omavaheline aset**us, mikroskaalas, konkurents, kooselt  
Agerer R, K **Hydnum 2 sp** kirjeldus  
Agerer R, C **Bankera fuligineo-alba**  
Agerer R, V **Entoloma saepium**  
Agerer R. 1989. **Impacts of artificial acid rain and liming on fruitbody form vs väetis**  
Agerer R. 1 **Chroogomphus helveticus** and **C. Rutilus** võivad mood EcM l  
Agerer R. 1991. Characterization of ectomycorrhiza. In: Norris JR, Read DJ, Varma  
Agerer R. 1991. Characterization of ectomycorrhiza. In: Norris JR, Read DJ, Varma  
Agerer R. 1 **Sarcodon imbricatus**  
Agerer R. 1 **Gomphidius roseus** ja **G. Glutinosus** võivad mood EcM koos  
Agerer R. 1 **Phellodon niger**  
Agerer R. 1 **Boletopsis leucomelaena**  
Agerer R. 1 **Hydnellum peckii**  
Agerer R. 1994. *Pseudotomentella tristis* (Thelephoraceae): Eine Analyse von Fruc  
Agerer R. 1996. *Albatrellus ovinus* (Schaeff.: Fr.) Kotl. & Pouz.+*Picea abies* (L) K  
Agerer R. 1 **T. albomarginata**  
Agerer R. 1996. *Ramaria aurea* (Schaeff.: Fr.) Que' l.+*Fagus sylvatica* L. Descr. E  
Agerer R. 1999. *Gyroporus cyanescens* (Bull.: Fr.) Que' l.+*Pinus sylvestris* L. Des  
Agerer R. 1999. *Rozites caperatus* (Pers.: Fr.) Karst.+*Pinus sylvestris* L. Descr. Ec  
Agerer R. 2 **klassifikatsioon** risomorfide ja hüüfide järgi  
Agerer R. 2 EcM anatoomia põhine seente filogenees. Kõigi kirjelduste loetelu ja tu  
Agnelli A, Ascher J, Corti G **bakterid ja seened**. DGGE. Bakterid väga mitmeklesise  
Agueda B, I **Boletus aereus**, **edulis**, **reticulatus** Cistus sp-l  
Ahlich K, Sieber TN. 1996. The profusion of dark septate endophytic fungi in non-e  
Ahonen-Jonnarth U, Göransson A, Finlay RD. 2003. Growth and nutrient uptake of  
Aikio S, Ruotsalainen AL. 2002. The modelled growth of mycorrhizal and non-myc  
Aime MC, Henkel TW, Ryvarden L. 2003. Studies in neotropical polypores 15: new  
Akasaka M, Tsuyuzaki S, Hase A. 2007. Annual growth of invasive Larix kaempfer  
Al Abras K, **vananemine**  
Al Sayegh-I **mustad morfotüübid**: leiti 4 tk kaevanduspinnalt -arv. Tomentellad  
Albee SR, Mueller GM, Kropp BR. 1996. Polymorphisms in the large intragenic spe  
Albee-Scott S. 2007. The phylogenetic placement of Leucogastrales, including *Myc  
Albee-Scott SR. 2007. Does secotioid inertia drive the evolution of false-truffles? M  
Albinsson C. 1997. Niche relations and association analysis of southern Swedish mi  
Albrecht C, Burgess T, Dell B, Lapeyrie F. 1994. Chitinase and peroxidase activities  
Aldrich-Wolfe L. 2007. Distinct mycorrhizal communities on new and established h  
Alexander C, Alexander IJ, Hadley G. 1984. Phosphate uptake by *Goodyera repens*  
Alexander C, Hadley G. 1983. Variation in symbiotic activity of *Rhizoctonia* isolate  
Alexander IJ, Ahmad N, Lee SS. 1992. The role of mycorrhizas in the regeneration o  
Alexander IJ, Ahmad N, Lee SS. 1992. The role of mycorrhizas in the regeneration o  
Alexander IJ, Bigg WL. 1981. Light microscopy of ectomycorrhizas using glycol me  
Alexander I **Hartigi vorgustik** toestatud  
Alexander IJ, Lee SS. 2005. Mycorrhizas and ecosystem processes in tropical rain f  
Alexander IJ. 1989. Mycorrhizas in tropical forests. In: Proctor J (ed). Mineral nutri  
Alexander IJ. 1989. Systematics and ecology of ectomycorrhizal legumes. Monogr. :  
Alexander IJ. 2006. Ectomycorrhizas - out of Africa? New Phytol. 172: 589-591.  
Alfaro ME, Zoller S, Lutzoni F. 2003. Bayes or bootstrap? A simulation study comp  
Ali NA, Jackson RM. 1989. **Stimulation of germination of spores of some ectomyc**  
Allen AP, Gillooly JF, Savage VM, Brown JH. 2006. Kinetic effects of temperature  
Allen EB, Allen MF, Helm I **ECM ja AM ning** peremeestaimede diversiteet globaal  
Allen MF et al. 2003. Ecology of mycorrhizae: a conceptual framework for complex  
Allen MF, C **vigased peale vulk-suktsessiooni**  
Allen MF, F **Adenostoma** (Rosaceae): arbutoid-like, DS, AM  
Allen TR, Millar T, Berch SM, Berbee ML. 2003. Culturing and direct DNA extract*

cd  
p/cd

cd  
p  
cd  
cd

p  
j

p

cd

p/cd

p

p/cd

x

p/cd

p

p/j

p/cd

p/cd

cd

cd

j

j

j

p/cd

p/cd

x

cd

p/cd

cd

p/cd

cd

x

p/cd

p

p/cd

p/cd

p/cd

Allendorf FW, Leary RF, Spruell P, Wenburg JK. 2002. The problems with hybrids: Allison SD, Czimeczik CI, Tr NH<sub>4</sub>NO<sub>3</sub> mõju NH<sub>4</sub>NO<sub>3</sub> mõju mullar NH<sub>4</sub>NC Allison SD, Martiny JHB. 2008. Resistance, resilience, and redundancy in microbial Allmer J, Vasiliauskas R, Ihr saproobsetel seentele kändudes, peentes okste saproobs Allsopp N, Stock WD. 1993. Mycorrhizal status of plants growing in the Cape Flori Alm EW, Oerther DB, Larsen N, Stahl DA, Raskin L. 1996. The oligonucleotide primers Alm EW, Zheng D, Raskin L. 2000. The presence of humic substances and DNA in Almeida-Neto M, Guimaraes PR, Guimaraes PR, Loyola RD, Ulrich W. 2008. A co Almeida-Neto M, Guimaraes PR, Lewinsohn TM. 2007. On nestedness analyses: re Altizer S, Ostfeld RS, Johnson PTJ, Kutz S, Harewell CD. 2013. Climate change and Altschul SF, Madden TL, Schäffer AA, Zhang J, Zhang Z, Miller W, Webb DJ. 199 Alvarado P, Manjon JL, Matheny PB, Estve-Raventos F. 2010. *Tubariomyces*, a new Alvarado P, Moreno G, Manjon JL, Gelpi C, Kaounas V, Konstantinidis G, Barsegh Alvarado P, Moreno G, Manjon JL. 2012. A new Tuber without spore ornamentatio Alvarez AJ, Khanna M, Toranzos GA, Stotzky G. 1998. Amplification of DNA bou Alvarez IF, Parlade J. 1992. *Loculotuber gennadii* gen. et comb. nov. and *Tuber m Alvarez IF, Rowney DL, Cobb FW. 1979. Mycorrhizae and growth of white fir seed Alvarez M, Huygens D, Diaz LM, Villanueva CA, Heyser W, Boeckx P. 2012. The Alverson WS, Whitlock BA, Nyffeler R, Bayer C, Baum DA. 1999. Phylogeny of th Alzetta C, Scattolin L, Scopel Tilia ITA, Padet tom-thel, palju Pezizales Amann R, Ludwig W. 2000. Ribosomal RNA-targeted nucleic acid probes for studie Amaranthus M, Trappe JM, Bednar L, Arthur D. 1994. Hypogeous fungal maaalust Amaranthus MP, Li CY, Per maasikapuu inoki Rhizopogon Amaranthus MP, Perry DA. 1994. The functioning of ectomycorrhizal fungi in the fi Amarasingham V, Brown GS, Mank JE, Carlson JE. 2002. Microsatellite DNA loci fo Amend A, Garbelotto M, Fang Z, Keeley S. 2010. Isolation by landscape in populati Amend A, Keeley S, Garbelotto M. 2009. Forest age correlates with fine-scale spati Amend AS, Oliver TA, Amaral-Zettler LA, Boetius A, Fuhrman JA, Horner-Devine Amicucci A, Guidi C, Zambonelli A, Potenza L, Stocchi V. 2000. Multiplex PCR fo Amicucci A, Zambonelli A, Giomaro G, Potenza L, Stocchi V. 1998. Identification of Amicucci A Pulvinula constellatio + Quercus pubescens -plektenh õhuke mantel, noi Ammarello Terfezia boudieri obs EcM Kobresial Ammirati J, Garnica S, Halling RE, Mata M, Mueller GM, Carranza J. 2007. New C Ampoorter E, Baeten L, Koricheva J, Vanhellefont M, Verheyen K. 2014. Do divers Anderberg AA, Swenson U. 2003. Evolutionary lineages in Sapotaceae (Ericales): a Anderberg AA. 1994. Cladistic analysis of Enkianthus with notes on the early diversi Andersen TF. 1996. A comparative taxonomic study of Rhizoctonia sensu lato empl Anderson IC, Cairney JWG. seene mütseel mullas: PCR-põhine -ülevaade Anderson IC, Cairney JWG. 2007. Ectomycorrhizal fungi: exploring the mycelial frc Anderson IC, Campbell CD, mullaseened raba Penicillium sp, Verticillium sp, cf Ph Anderson IC, Campbell CD, Prosser IJ. 2003. Potential bias of fungal 18S rDNA anc Anderson IC, Chambers SM, Cairney JWG. 1998. Use of molecular meth Pisolithu Anderson IC, Chambers SM, Cairney JWG. 2001. Characteristics of glutamine upta Anderson IC, Chambers SM, Cairney JWG. 2001. Distribution and persist Pisolithu Anderson IC, Chambers SM, Cairney JWG. 2001. Variation in nitrogen source utilis Anderson MJ, Willis TJ. 2003. Canonical analysis of principal coordinates: a useful Anderson MJ. 2001. A new method for non-parametric multivariate analysis of varia Anderson MJ. 2005. PERMANOVA: a FORTRAN computer program for permutati Anderson Rs, Ashe JS. 2000 mardikate ja põrnaikate BD Hondurases ekstrapoleeri Andersson AF, Lindberg M, Jakobsson H, Bäckhed F, Nygren P, Engstrand L. 2008 Andrade ACS, Queiroz MH, Hermes RAL, Oliveira VL. 2000. Mycorrhizal status c Andres-Alpuente A, Sanchez S, Martin M, Aguirre AJ, Barriuso JJ. 2014. Comparat Andrew C, Lilleskov EA. 2009. Productivity and community structure of e CO<sub>2</sub> sti Andrews JH, Harris RF. 1997. Dormancy, germination, growth, sporulation and disp Andrews JH, Harris RF. 2000. The ecology and biogeography of microorganisms on Antibus RK, Croxdale JG, Miller OK, Linkins AE. 1981. Ectomycorrhizal fungi of s Antoninka A, Wolf JE, Bowker M, Classen AT, Johnson NC. 2009. Linking above- Aponte C, García LV, Marañón T, Gardes M. 2010. Indirect host effect on ectomyc Aponte C, García LV, Marai tammeliigid omavad erinevalt varise kvaliteeti Archibald FS. 1992. A new assay for lignin-type peroxidases employing the dye azu Arfi Y, Marchand C, Wartel mangroovisetete seened anaeroobses kks: 454 f Arita HT, Vazquez-Dominguez E. 2008. The tropics: cradle, museum or casino? A c Armstrong W, Read DJ. 1972. Some observations on Oxygen transport in conifer se Arnebrant K, Baath E, Söderström B, Nohrstedt H-Ö. 1996. Soil microbial activity i Arnebrant K, Ek H, Finlay RD, Söderström B. 1993. Nitrogen translocation between Arnold AE, Henk DA, Eells lehe-endofüüdid: kultuuripõhine vs otse PCR+kloneeri Arnold AE, Lutzoni F. 2007. lehe-endofüüdid: Troopikas OTUdest Sordariomycete: Arnold AE, Miadlikowska J, Higgins KL, Sarvate SD, Gugger P, Way A, Hofstetter*

p/cd  
cd  
j  
p/cd  
cd  
p/cd  
p  
p  
cd  
p/cd  
p  
p  
p/cd  
p/cd  
cd  
p/cd  
p/cd  
cd  
p/cd  
p/cd  
p  
cd  
p/cd  
p/cd  
cd  
p  
x  
p  
p  
p  
cd  
j  
p  
p  
cd  
cd  
x  
p/cd  
p/cd  
p  
p/cd  
cd  
p  
x  
p/cd  
0

Arnold AE. 2007. Understanding the diversity of foliar endophytic fungi: progress, cl  
Arnold AE. 2008. Endophytic fungi: hidden components of tropical community ecol  
Arnolds E. 1991. Decline of langus vs VK diversiteet Lääne-Euroopas 19. langus L  
Arnolds E. 1995. Conservation and management of natural populations of Lääne-E  
Arnolds EJM. 1997. Biogeography and Conservation. In: Wicklow & Söd muutused  
Arocena JM *Piloderma croceum*  
Arocena JM, Göttlein A, Raidl S. 2004. Spatial changes of soil solution and mineral  
Arora D. 1986. Mushrooms demystified, 2nd Edn. Ten Speed Press, Berkeley, CA.  
Arora DS, Chander M, Gill PK. 2002. Involvement of lignin peroxidase, manganese  
Arora DS, Gill PK. 2001. Comparison of two assay procedures for lignin peroxidase  
Artz, RRE, Anderson IC, Ch EmH turbaväljadel: EmH turbaväljadel: domin kotteene  
Ashford AE *Pisonia grandis*-Theleporales must tüüp: EcM esmakirjeldus: Hartig n  
Ashford AE *Pisonia grandis*-Theleporales must tüüp ja pruun tüüp: EcM morfoloog  
Ashford AE, Allaway WG. 2002. The role of the motile tubular vacuole system in m  
Ashkannejhad S, Horton TR. metsas (rohkem) metsas: *Suillus spp.*, *Rhizopogon spp*  
Ashton DH. 1975. Studies of litter in *Eucalyptus regnans* forests. Aust. J. Bot. 23: 4  
Ashton DH. 1975. The root and shoot development of *Eucalyptus regnans*. Aust. J.  
Ashton DH. *Eucalyptus regnans*: Cort purpurascens (ka Pomaderrisell). Ektendo-tüü  
Ashton PS, Gunatilleke CVS. 1987. New light on the plant geography of Ceylon. I. J  
Ashton PS. 1988. Dipterocarp biology as a window to the understanding of tropical  
Aspray TJ, Frey-Klett P, Jones JE, Whipps JM, Garbaye J, Bending GD. 2006. Myc  
Auckland Fungus Group. 2009. New Zealand Fungi. <http://www.fungi.co.nz/>  
August J-C, Barberan A, Casamayor EO. 2010. Global ecological patterns in uncult  
Averill C, Finzi A. 2011. Increasing plant use of organic nitrogen with elevation is re  
Averill C, Turner BL, Finzi AC. 2014. Mycorrhiza-mediated competition between p  
Averill C. 2014. Divergence in plant and microbial allocation strategies explains con  
Aviram S, Roth-Bejerano N, Kagan-Zur V. 2004. Two ITS forms co-inhabiting a sir  
Avis PG, Branco S, Tang Y, EcM seenekoosluste uurimisel: Vkke segust era  
Avis PG, Charvat I. 2005. Ti inokpot Minnesot kontroll: *Russula spp.*, *Thel* spp, Cort  
Avis PG, Dickie IA, Mueller GM. 2006. A 'dirty' business: testing the limitations of  
Avis PG, McLaughlin DJ, D tamme puisniit 3 : kontroll: *Cenoc*, *Cort1*, *Toi kõrge N*:  
Avis PG, Mueller GM, Lussu Chicago, IL, In IND kontr: *Cenoc spp.*, *Xeroc ru*  
Awameh M, Alsheikh A. 1980. Features and analysis of spore germination in the br  
Ayres DL, Darling A, Zwickl DJ, Beerli P, Holder MT, Lewis PO and 6 others. 201  
Ayres E, Dromph KM, Bardgett RD. 2006. Do plant species encourage soil biota th  
Ayres E, Steltzer H, Berg S, Wall DH. 2009. Soil biota accelerate decomposition in  
Ayres E, Steltzer H, Berg S, Wallenstein MD, Simmons BL, Wall DH. 2009. Tree s  
Azul AM, A *Quercirhiza ectendotrophica* arv kotteen, mood haustoreid. Mantel tüüj  
Azzouzi K, Vekemans X, Meerts P, Lefebvre C. 1997. Allozyme variation in calcic  
Ba AM, Duponnois R, Moyersoen B, Diedhiou AG. 2012. Ectomycorrhizal symbios  
Ba AM, Garbaye J, Dexhein *Afzelia africana* inokul metsamullaga kolonis  
Ba AM, Thoen D. 1990. First syntheses of ectomycorrhizas between *Afzelia africana*  
Baar H, Hoi xxx, I a peale metsapõllooduslikud noored männid peale põl  
Baar J, Bastiaans T, van de Coevering MA, Roelofs JGM. 2002. Ectomycorrhizal re  
Baar J, Comini B, Elferink MO, Kuyper TW. 1997. Performance of four ectomycorr  
Baar J, de Vries FW. 1995. I ECM vs humust humuse lisades vaid *Laccaria* ja ITE  
Baar J, Elferink MO. 1996. Ectomycorrhizal development on Scots pine (*Pinus sylv*  
Baar J, Horton TR, Kretzer AM, Bruns TD. 1999. Mycorrhizal colonization of *Pinu*  
Baar J, Ozinga WA, Smeets IL, Kuyper TW. 1994. Stimulatory and inhibitory effect  
Baar J, Stanton NL. 2000. Ectomycorrhizal fungi challenged by saprotrophic basidic  
Baar J, van Groenendael JM, Roelofs JGM. 2000. Are ectomycorrhizal funi *Lepa Ec*  
Baar J. 1996. The ectomycorrhizal flora of primary and secondary stands c suurem I  
Baas Becking LGM. 1934. Geobiologie of inleiding tot de milieukunde. W.P. van St  
Baath E, Nilsson LO, Göransson H, Wallander H. 2004. Can the extent of degradati  
Baath E. 2001. Estimation of fungal biomass in soil using 14C-acetate incorporation  
Baath E. 2001. Estimation of fungal growth rates in soil using 14C acetate incorpora  
Babikova Z, Gilbert L, Bruce TJA, Birkett MA, Caulfield JC, Woodcock C, Pickett  
Bachy C, Dolan JR, Lopez-Garcia P, Deschamps P, Moreira D. 2013. Accuracy of j  
Baciarelli-F *Tuber spp.*: *rufur Tuber melanospo* *Tuber melanosporum*, *Tuber 5 spp.*, F  
Backeus I, Pettersson B, Strömquist L, Ruffo C. 2006. Tree communities and struct  
Backeus I, Rulangeranga ZK, Skoglund J. 1994. Vegetation changes on formerly ov  
Backeus I. 1992. Distribution and vegetation dynamics of humid savannas in Africa  
Badali H, Gueidan C, Najafzadeh MJ, Bonifaz A, Gerrits van den Ende AHG, de H  
Baek J-M, Kenerley CM. 1997. Detection and enumeration of a genetically modifie  
Baer SG, Kitchen DJ, Blair JM, Rice CW. 2002. Changes in ecosystem structure an  
Bagchi R, Gallery RE, Gripenberg S, Gurr SJ, Narayan L, Addis CE, Freckleton RP  
Bagchi R, Press MC, Scholes JD. 2010. Evolutionary history and distance dependen  
Bagley SJ, Orlovich DA. 2004. Genet size and distribution of *Amanita muscaria* in a  
Bahram M, Kõljalg U, Courty P-E, Diedhiou A, Kjoller R, Põlme S, Ryberg M, Vel



p/cd  
 p/cd  
 cd  
 p/cd  
 cd  
 p/cd  
 p/cd  
 1  
 1  
 1  
 1  
 1  
 p  
  
 cd  
 cd  
 p/cd  
 p/cd  
 p/cd  
 p  
  
 cd  
 cd  
 j  
 p/cd  
 x  
 p/cd  
 p/cd  
 p/cd  
  
 cd  
  
 cd  
 p  
  
 cd  
  
 cd  
 cd  
 p/cd  
 p/cd  
 cd  
 cd  
  
 p/cd  
 p  
 cd  
 j

x

x

Bayman P, Lebrun LL, Tremblay RL, Lodge DJ. 1997. Variation in endophytic fungus  
 Beakes GW, Glockling SL, Sekimoto S. 2011. The evolutionary phylogeny of the oomycete  
 Beauchamp VB, Stromberg JC, Stutz JC. 2006. Arbuscular mycorrhizal fungi associated with  
 Beaumont LJ, Pitman A, Perkins S, Zimmermann NE, Yoccoz NG, Thuiller V. 2006. The  
 Becerra A, Cortinarius helodes ja Gyrodon monticola (iseäralikud tsistiidid) lepal  
 Becerra A, Pritsch K, Arrigo Alnus acuminata Tomentella3, Tomentella1, Lact omp  
 Becerra A, Zak MR, Horton Alnus acuminata Tomentella3, Tomentella1, Lact omp  
 Becerra AG, Nouhra ER, Sil Salix humboldi Tomentella sp, Inocybe sp  
 Becerra-LopezLavalley LA, Saleeba JA, Lyon BR. 2005. Molecular identification of  
 Bechem EET, Alexander IJ. 2009. Inoculum production and inoculation of Gnetum  
 Bechem EET, Alexander IJ. Gnetum: Aafrikas 3 Scleroderma filotüüpi. Ük  
 Bechem EET, Alexander IJ. 2012. Phosphorus nutrition of ectomycorrhizal Gnetum  
 Bechem EET. 2004. Mycorrhizal Status of Gnetum spp. in Cameroon: Evaluating D  
 Bechem EET. 2011. Growth and in vitro phosphate solubilising ability of Scleroderma  
 Beckjord PR, McIntosh MS. 1984. Growth and fungal persistence by Quercus rubra  
 Beckjord PR, Melluish JH, McIntosh MS. 1985. Effects of nitrogen and phosphorus  
 Becklin KM, Hertweck KI, J seened risosfääris: eri taimedel erinev SSU koo  
 Beeching JR et al. 1989  
 Beeli M. 1928. Fungi Goossensiani. Contribution A L' Etude De La Flore Mycologique  
 Beenken L. 2004. Die Gattung Russula. Untersuchungen zu ihrer Systematik anhand  
 Begerow D, Nilsson RH, Unterseher M, Maier W. 2010. Current state and perspectives  
 Beguiristain T, Lapeyrie F. 1997. Host plant stimulates hypophosphite accumulation in  
 Behrens S, Rühland, Ignacio J, Huber H, Fonseca A, Spencer-Martins I, Fuchs BM,  
 Beiler KJ, Durall DM, Simar Pseudotsuga Ühel puul tuvastati max 8 R vesic  
 Beiler KJ, Simard SW, Lemay V, Durall DM. 2012. Vertical partitioning between si  
 Belfiori B, Riccioni C, Temp ITA, Quercus pubescens muld vs juured; vs Tu  
 Bell CD, Soltis DE, Soltis PS. 2010. The age and diversification of angiosperms re-  
 Bell T, Ager D, Song J-I, Newman JA, Thompson IP, Lilley AK, van der Gast CJ. 2  
 Bellemain E, Davey ML, Ka igijääs: madal BD, esindatud erinevad rühmad.  
 Bellemare J, Motzkin G, Foster DR. 2002. Legacies of the agricultural past in the fo  
 Bellgard SE. 1991. Mycorrhizal associations of plant species in Hawkesbury sandst  
 Bencivenga M, Di Massimo G, Donnini D Tanfulli M. 1995. Micorrize inquinanti fr  
 Bending GD, Read DJ. 1995. The structure and function of the vegetative mycelium  
 Bending GD, Read DJ. 1996. Effects of the soluble polyphenol tannic acid on the ac  
 Bending GD, Read DJ. 1996. Nitrogen mobilization from protein-polyphenol compl  
 Bending GD, Read DJ. 1997. Lignin and soluble phenolic degradation by ectomycor  
 Bending GD. 2007. What are the mechanisms and specificity of mycorrhization help  
 Benjamini Y, Hochberg Y. 2000. On the adaptive control of the false discovery rate  
 Bennett KD, Tzedakis PC, Willis KJ. 1991. Quaternary refugia of North European t  
 Benson DR, Clawson ML. 2000. Evolution of the actinorhizal plant symbioses. In: 1  
 Benson DR, Vanden Heuvel BD, Potter D. 2004. Actinorhizal symbioses: diversity ;  
 Bent E, Kiekel P, Brenton R, Taylor DL. 2011. Root-associated ectomycorrhizal fur  
 Bent E, Taylor DL. 2010. Direct amplification of DNA from fresh and preserved ect  
 Benton MJ, Ayala FJ. 2003. Dating the tree of life. Science 300: 1698-1700.  
 Benton MJ. 1995. Diversification and extinction in the history of life. Science 268: 5  
 Benucci GMN, Raggi L, Alb Tuber aestivum tom-thel, tuber spp  
 Berbee ML, Carmean DA, Winka K. 2000. Ribosomal DNA and resolution of bran  
 Berbee ML, Taylor JW. 1993. Dating the evolutionary radiations of the true fungi. C  
 Berbee ML, Taylor JW. 2001. Fungal molecular evolution: gene trees and geologic t  
 Berbee ML, Taylor JW. 2010. Dating the molecular clock in fungi – how close are v  
 Berbee ML. 1996. Loculoascomycete origins and evolution of filamentous ascomyc  
 Berch SM, Allen TR, Berbee ML. 2002. Molecular detection, community structure ;  
 Berch SM, Roth AL. 1993. Ebatsuuga seemikud: inokuleeritud Rhizopogonia vs n  
 Berch SM. 1983. Endogone pisiformis : axenic culture and associations with Sphagi  
 Béreau M, Gazel M, Garbaye J. 1997. Les symbioses mycorrhiziennes des Lõuna-  
 Berg G, Zachow C, Lottman mullaseente kultuuripõhine + BOX-PCR + sekv divers:  
 Bergemann SE, Douhan GW, Garbelotto M, Miller SL. 2006. No evidence of popul  
 Bergemann SE, Garbelotto M Lithocarpus densi EcM domin Cenoc, Lactarius sp, Ma  
 Bergemann SE, Miller SL. 2002. Size, distribution and persistence of gene geneti  
 Bergero R, Girlanda M, Bello F, Luppi AM, Perotto S. 2003. Soil persistence and bi  
 Bergero R, Perotto S, Girlanda M, Vidano G, Luppi AM. 2000. Ericoid mycorrhizal  
 Bergius N, Danell E. 2000. The Swedish matsutake (Tricholoma nauseosum syn. T.  
 Berglund H, Jonsson BG. 2001. Predictability of plant and fungal species ; haruldase  
 Bergman B, Rain AN, Rasmussen U. 2007. Cyanobacterial associations. In: Elmer  
 Bergsten J, Bilton DT, Fujisawa T, Elliott M, Monaghan MT, Balke M, Hendrich L,  
 Bergström CT, Lachmann M. 2003. The red king effect: when the slowest runner wi  
 Berliner R, Torrey JG. 1989. Studies on mycorrhizal associations in Harvard forest,  
 Berman JT, x tammik, tammehorendik, kultuurpinnas: metsa-ja horendik  
 Bermingham S, Maltby L, Cooke RC. 1995. A critical assessment of the validity of c



p  
cd  
p  
cd  
cd  
cd  
p/cd

cd

cd  
p/cd  
p/cd

p/cd  
b  
p/cd

p  
p/cd  
cd  
cd  
p/cd  
cd  
p/cd  
1

e  
e  
p  
j  
p

j

cd  
p/cd

cd  
cd

cd

x

x

Berndt R, Kvalgel nulul mineraalmullas kottseened (3). Ühe seenmantlil kurrulised s  
Berndt R, O mõned kottseened Abies albal: septade ultrastr  
Bertault G, Raymond M, Berthomieu A. 1998. Trifling variation in truffles. Nature 3  
Bertault G, Rousset F, Fernandez D, Berthomieu A, Hochberg ME, Callot G, Raym  
Bertilsson S, Cavanaugh CM, Polz MF. 2002. Sequencing-independent method to ge  
Bertini L, Amicucci A, Agostini D, Polidori E, Potenza L, Guidi C, Stocchi V. 1999  
Bertolino S, Vizzini A, Wauters LA, Tosi G. 2004. Consumption of hypogeous and  
Bethlenfalvay GJ, Dakessian S, Pacovsky RS. 1984. Mycorrhizae in a southern Cali  
Bever JD, Dickie IA, Facelli E, Facelli JM, Klironomos J, Moora M, Rillic MC, Sto  
Bever JD, Richardson SC, Lawrence BM, Holmes J, Watson M. 2009. Preferential r  
Bever JD. 2002. Host-specific AM diversiteet: peremeheelistus läbi 2 polvkonna  
Bever JD. 2002. Negative feedback within a mutualism: host-specific growth of myc  
Bever JD. 2003. Soil community feedback and the coexistence of competitors: conc  
Bezemer TM, Fountain MT, Barea M, Christensen S, Dekker SC, Duyts H, van Hal  
Bidartondo xxx Pinus longaeva: regeneratsioon potti viidud pinnasel  
Bidartondo MI, Bruns TD, Weiss M, Sergio C, Read DJ. 2003. Specialized cheating  
Bidartondo MI, Bruns TD. 2 mükoheteroofsetel monotropoididel  
Bidartondo MI, Burghardt B, Gebauer G, Bruns TD, Read DJ. 2004. Changing part  
Bidartondo MI, Duckett JG. 2010. Conservative ecological and evolutionary pattern  
Bidartondo MI, Ek H, Wallander H, Söderström B. 2001. Do nutrient additions alter  
Bidartondo MI, Kretzer AM, Pine EM, Bruns TD. 2000. High root concentration an  
Bidartondo xxx Monotropoid vs kõrval none  
Bidartondo MI, Read DJ, Tr algeliste maismaataimede risoidides: paljudes r  
Bidartondo MI, Read DJ. 2008. Fungal specificity bottlenecks during orchid germin  
Bidartondo MI, Redecker D, AM diversiteet-epiparasiidid spetsialiseerunud kindlale  
Bidartondo MI. 2005. The evolutionary ecology of mycoheterotrophy. New Phytol.  
Bidartondo MI. 2008. Preserving accuracy in GenBank. Science 319: 1616.  
Bidartondo MI, Gardes M. 2005. Fungal diversity in molecular terms: profiling, ident  
Bidartondo MI. 2005. The evolutionary ecology of myco-heterotrophy. New Phytol. 1  
Bilan MV. 1971. Some Aspects of Tree Root Distribution. In: HacsKaylo E (ed. ). M  
Bills GF, Holtzman GI, Miller OK. 1986. Comparison of ectomycorrhizal-kuusikus  
Bills GF, Polishook JD. 199- mikroseente diversiteedi võrdlemine rarefactioni abil  
Binder M, Bresinsky A. 2002. Deviation of a polymorphic lineage of Gasteromycete  
Binder M, Hibbett DS, Larsson K-H, Larsson E, Langer E, Langer G. 2005. The phy  
Binder M, Hibbett DS. 2002. Higher level phylogenetic relationships of Homobasidi  
Binder M, Hibbett DS. 2006. Molecular systematics and biological diversification of  
Bininda-Emonds ORP, Cardillo M, Jones KE, MacPhee RDE, Beck RMD, Grenyer  
Bininda-Emonds ORP, Gittleman JL, Steel MA. 2002. The (super)tree of life: proce  
Bjelland T, Ekman S. 2005. mikroseente diversiteet kõvas kivis Ophioparma-samb  
Björbækmo MFM, Carlsen T, Brysting A, Vrålstad T, Høiland K, Ugland KI, Geml  
Björkman E. 1944. The effect of strangulation on the formation of mycorrhiza in pin  
Björkman E. 1945. Über die bedingungen der Mycorrhizabildung bei Kiefer und Fi  
Björkman E. 1949. The ecological significance of the ectotrophic mycorrhizal associ  
Blaalid R, Davey ML, Kause Bistorta vivipara; Svalbard vs latitude: pooluse  
Blanchette RA, Abad AR, Farrell RL, Leathers TD. 1989. Detection of lignin peroxi  
Blanchette RA, Obst JR, Hedges JI, Weliky K. 1988. Resistance of hardwood vesse  
Blanchette RA. 1983. An unusual decay pattern in brown-rotted wood. Mycologia 7  
Blanchette RA. 1995. Degradation of the lignocellulose complex in wood. Can. J. B  
Blanchette RA. 2001. Fungus ashes and tobacco: the use of Phellinus igniarius by th  
Blaschke H. Tuber puberulum  
Blaschke H. 1991. Distribution, Mycorrhizal Infection, and Structure of Roots of C  
Blasius D, Kottke I, Oberwinkler F. 1990. Spatial and seasonal dynamics of ectom  
Blaudez D, Botton B, Chalot M. 2000. Effects of heavy metals on nitrogen uptake b  
Blaudez D, Jacob C, Turnau K, Colpaert JV, Ahonen-Jonnarth U, Finlay R, Botton B  
Bligh EG, Dyer WJ. 1959. A rapid method of total lipid extraction and purification.  
Bliss T, Powers TO, Brassil CE. 2010. The spatial influence of aboveground diversi  
Blomberg SP, Garland T, Ives AR. 2003. Testing for phylogenetic signal in compar  
Blum JD, Klaue A, Nezat CA, Driscoll CT, Johnson CE, Siccama TG, Eagar C, Fah  
Blüthgen N. 2010. Why network analysis is often disconnected from community eco  
Boag B, Yeates GW. 1998. Soil nematode biodiversity in terrestrial ecosystems. Bic  
Boaler SB, Sciwale KC. 1966. Ecology of a miombo site, Lupa North Forest Reserv  
Boddy L, Buntgen U, Egli S, Gange AC, Heegaard E, Kirk PM, Mohamm kliimarr  
Boddy L. 2000. Interspecific combative interactions between wood-decaying basidi  
Bödeker ITM, Nygren CMR, Taylor AFS, Olson A, Lindahl B. 2009. Class II perox  
Bodensteiner P, Binder M, Moncalvo J-M, Agerer R, Hibbett DS. 2004. Phylogenet  
Bodrossy L, Stralis-Pavese N, Murrell JC, Radajewski S, Weillharter A, Sessitsch A  
Boeckx P, Paulino L, Oyarzun C, van Cleemput O, Godoy R. 2005. Soil d15N patte  
Boehm EWA, Mugambi GK, Miller AN, Huhndorf SM, Marincowitz S, Spatafora J  
Boerner REJ, DeMars BG, Leicht PN. 1996. Spatial patterns of mycorrhizal infectiv

cd  
 cd  
 p/cd  
 p

cd  
 cd  
 p/cd

2013 5

cd  
 p/cd  
 p/cd

x  
 p/cd

p  
 p/cd  
 p  
 p  
 p  
 p  
 p  
 p

p/cd  
 p/cd  
 p/cd

cd  
 cd  
 p

p/cd

p/cd  
 p

p/cd

x

p  
 p

cd  
 cd

p  
 cd  
 cd  
 cd  
 cd

Bogar KM, Kennedy PG. 20 **Alnus vs Betula**: ühe taime kohalolu mõjutab te Bogar LM, Dickie IA, Kenn **NZL Alnus glutinosa**, *Salix fragilis*. Mõlemal n Bogeat-Triboulot M-B, Bartoli F, Garbaye J, Marmeisse R, Tagu D. 2004. Fungal e Bohannan BJM, Hughes J. 2 **mikroobide diversiteedi** mõõtmise alternatiivid: parame Bois G, Piche Y, Fung MYP **väga madal kaev: vaid Laccaria, Sebacina, Wilcoxina**. Bokor R. 1958. Vizsgalatok a tölgyek valodi mykorrhiza gombainak meghatározasa Bokulich NA, Mills DA. 2013. **Improved selection of Internal Transcribed Spacer-sj** Bokulich NA, Subramanian S, Faith JJ, Gevers D, Gordon JI, Knight R, Mills DA, C Bollen WB, Lu KC. 1968. Nitrogen transformations in soils beneath red alder and c Bomberg M, Jurgens G, Saano A, Sen R, Timonen S. 2003. Nested PCR detection c Bonch-Osmolovskaya EA, Miroshnichenko ML, Lebedinsky AV et al. 2003. Radioi Bond WJ, Woodward FI, Midgley GF. 2005. The global distribution of ecosystems i Bonito G, Smith ME, Nowak M, Healy RA, Guevara G, Cazares E et al. 2013. Hist Bonito GM, Brenneman T, V Carya istandus **Tuber 36, Tuber lyonii** (K 50%) Bonito GM, Gryganskyi AP, Trappe JM, Vilgalys R. 2010. A global meta-analysis c Bonito GM, Smith ME, Brer kuivatatud Car inokpot domin Pezizaceae ja Py Bonkowski M, Jentschke G, Scheu S. 2001. Contrasting effects of microbial partner Bonnardeaux Y, Brundrett M, Batty A, Dixon K, Koch J, Sivasithampam K. 2007. Booth MG. 2004. Mycorrhizal networks mediate overstorey-understorey competitio Borcard D, Legendre P, Drapeau P. 1992. Partialling out the spatial component of ec Borcard D, Legendre P. 2002. All-scale spatial analysis of ecological data by means Borchers SL, Perry DA. 1990. Growth and ectomycorrhiza formation in Douglas-fir Borer ET, Seabloom EW, Tilman D. 2012. Plant diversity contrls arthropod biomass Boström B, Comstedt D, Ekblad. 2008. Can isotopic fractionation during respiration Botnen S, Vik U, Carlsen T, Svalbard: *Drya Svalbard: /inocybe, tomentella-l* Bouchet P, Jaffre T, Veillon. 1995. Plant extinction in New Caledonia: protection of Bouckim H, Plassard C. 2003. Juvenile nitrogen uptake capacities and root architect Bougher NL, Fuhrer BA, Horak E. 1994. Taxonomy and biogeography of Australian Bougher NL, Grove TS, Malajczuk N. 1990. Growth and phosphorus acquisition of Bougher NL, Lebel T. 2001. Sequestrate (truffle-like) fungi of Australia ar **AUS ja N** Bougher NL **Descolea: lühikesed suure nupuga tsüstiidid** Bougher NL, Malajczuk N. 1990. Effects of high soil moisture on formation of ecto Bougher NL, Thiers HD. 1991. An indigenous species of *Leccinum* (Boletaceae) fro Bougher NL. 1995. Diversity **AUS EcM seente** BD on u 6500 liiki, arvesta **AUS EcM** Bougoure DS, Cairney JWG. 2005. Assemblages of ericoid mycorrhizal and other re Bougoure DS, Cairney JWG. 2005. Fungi associated with hair roots of *Rhododendr* Bougoure DS, Cairney JWG. 2006. Chitiniolytic activities of ericoid mycorrhizal an Bougoure DS, Parkin PI, Cai ErM Bougoure JJ, Bougoure DS, Cairney JWG, Dearnaley JDW. 2009. ITS-RFLP and se Bougoure JJ, Brundrett MC, Grierson PF. 2010. Carbon and nitrogen supply to the t Bougoure DS, Cairney JWG. 2005. Assemblages of ericoid mycorrhizal and other ro Bougoure DS, Cairney JWG. **ErM seened Rhododendronil** Australias: 3 taime: dom Boulinier T, Nichols JD, Sau **lindude liigirikku**se modelleerimine eri jackknife meeto Boullard B, Dominik T. 1960. **Recherches comparatives entre le mycotrophisme du** Boullard B, Dominik T. 1960. Recherches comparatives entre le Mycotrophisme du Boullard B. 1957. Etude des mycorhizes dans le genre *Cerdu*. Premiere contributic Bourett TM, Sweigard JA, Czymmek JK, Carroll A, Howard RJ. 2002. Reef coral fl Bowers RM, McLetchie S, Knight R, Fierer N. 2011. Spatial variability in airborne l Bowling DR, Pataki DE, Randerson JT. 2008. Carbon isotopes in terrestrial ecosyst Boyle CD, Hellenbrand K-E. 1991. Assessment of the effect of mycorrhizal fungi on Boysen M, Borja M, del Moral C, Salazar O, Rubio V. 1996. Identification at strain Bradbury S! xxx, kirjeldusteg 3 noort vs 3 vana metsa **vs ECM:** Bradbury S! xxx **raiesmikul; suktst Kokku: Pilod byssinum, Pilod fallax,** Bradford MA, Jones TH, Bardgett RD et al. 2002. Impacts of soil faunal community Bragazza L, Bardgett RD, Mitchell EAD, Buttler A. 2014. **Linking soil microbial co** Branco S, Ree RH. 2010. Se **Serpentiin vs n Tom-thel, russ, inoc** Branco S. 2010. **Serpentine s Serpentiin vs miteserp mullal** *Quercus*: transpl Brand F, Ag **Fagirhiza tubulosa** -kottseen sarn L488; *Fagirhiza cystidiophora* -sarn T Brand F. 19 **Genea hispidula** Brandt A, de Kroon H, Reynolds HL, Burns JH. 2013. Soil heterogeneity generated Brandt O, Feldner J, Stephan A, Schröder M, Schnölzer M, Arlinghaus HF, Hoheise Brandtberg P-O, Bengtsson J, Lundkvist H. 2004. Distributions of the capacity to tal Brasier C. 2000. The rise of the hybrid fungi. *Nature* 405: 134-135. Brasier CM. 1997. Fungal species in practice: identifying species units in fungi. In: C Bratek Z, Ja **Terfezia terfezioides** + *Robinia pseudoacacia* -mantli ja hartigi võrgustil Braun-Lüllemann A, Hüttermann A, Majcherczyk A. 1999. Screening of ectomycorr Brazna A, Hingamp P, Guackenbush J et al. 2001. Minimum information about a m Brearley FQ, Press MC, Sch vs lehekõdu **kontroll: Inocybe spp, Cenococcum;**





p  
 cd  
 cd  
 p/cd  
 p/cd  
 p/cd  
 p  
 p/cd  
 cd  
 cd  
 x  
 p/cd x  
 p/cd  
 t  
 p  
 p  
 p  
 j  
 cd  
 cd  
 p  
 p  
 p/cd  
 p  
 p/cd  
 p  
 p/cd  
 cd  
 cd  
 p  
 x  
 cd  
 cd  
 j  
 p/cd  
 1  
 cd  
 p/j  
 p  
 p/cd  
 cd  
 j

Calwell BA, Jumpponen A, Trappe JM. 2000. Utilization of major detrital substrate  
 Camarero S, Ruiz-Duenas FJ, Sarkar S, Martinez MJ, Martinez AT. 2000. The cloni  
 Camarero S, Sarkar S, Ruiz-Duenas FJ, Martinez MJ, Martinez AT. 1999. Descripti  
 Cameron DD, Bolin FJ. 2010. Isotopic evidence of partial mycoheterotrophy in the  
 Cameron DD, Johnson I, Read DJ, Leake JR. 2008. Giving and receiving: measuring  
 Cameron DD, Leake JR, Read DJ. 2006. Mutualistic mycorrhiza in orchids: evidenc  
 Cameron DD; Preiss K, Gebauer G, Read DJ. 2009. The chlorophyll-containing orcl  
 Cameron KM. 2004. Utility of plastid psaB gene sequences for investigating intrafar  
 Camp WH. 1940. Aphyllous forms in *Pyrola*. Bull. Torr. Bot. Club 67: 453-465.  
 Campbell BM, Angelsen A, Cunningham A, Katerere Y, Siteo A, Wunder S. 2007. I  
 Campbell RN. 1996. Fungal transmission of plant viruses. Annu. Rev. Phytopathol. :  
 Caporaso JG, Bittinger K, Bushman F, DeSantis TZ, Andersen GL, Knight R. PyNa  
 Carafa A, Duckett JG, Ligrone R. 2003. Subterranean gametophytic axes in the prin  
 Cardillo M. 1999. Latitude and rates of diversification in birds and butterflies. Proc.  
 Cardinale BJ, Matulich KL, Hooper DU, Byrnes JE, Duffy E, Gamfeldt L, Balvaner  
 Cardinale BJ, Srivastava DS, Duffy JE, Wright JP, Downing AL, Sankaran M, Jous  
 Carfrae JA, Skene KR, Shep noor kuusik Sotir N saaste suurendab domin Tylospora  
 Carleton TJ, Read DJ. 1991. Ectomycorrhizas and nutrient transfer in conifer-feathe  
 Carlsen T, Aas AB, Lindner D, Vrålstad T, Schumacher T, Kauserud H. 2012. Don't  
 Carlsen TA. 2002. Molecular diversity of root endophytes in an alpine *Bistorta vivip*  
 Carninci P, Shibata Y, Hayatsu N, Itoh M, Shiraki T, Hirozane T, Watahiki A, Shiba  
 Carpenter SR. 1996. Microcosm experiments have limited relevance for community  
 Carpenter SR. 1999. Microcosm experiments have limited relevance for community  
 Carriconde F, Gardes M, Jargeat P, Heilmann-Clausen J, Mouhamadou B, Gryta H.  
 Carriconde F, Gardes M, Jargeat P, Heilmann-Clausen J, Mouhamadou B, Gryta H.  
 Carroll G. 1995. Forest endophytes: pattern and process. Can. J. Bot. 73: S1316-S1:  
 Carroll G. 1995. Forest endophytes: pattern and process. Can. J. Bot. 77 (Suppl. 1):  
 Carson JK, Gonzales-Quinones V, Murphy DV, Hinz C, Shaw JA, Gleeson DB. 20:  
 Carter JP, Spink J, Cannon F mikroseened odra ja nisujuurtes erineva maakasutuseg  
 Caruso T, Rillig MC, Garlaschelli D. 2012. On the application of network theory to  
 Casarin V, Plassard C, Hinsinger P, Arvieu J-C. 2004. Quantification of ectomycorri  
 Castellano MA, Trappe JM, Lodge DJ. 2007. *Mayamontana coccolobae* (Basidiom  
 Castellano MA, Trappe JM. 1985. Ectomycorrhizal formation and plantation perfor  
 Castellano MA, Trappe JM. 1985. Mycorrhizal associations of five species of *Monc*  
 Castellano MA, Trappe JM. 1992. Australasian truffle-like fungi. VI. *Gigasperma* (  
 Castellano MA, Trappe JM. 1992. Australian truffle-like fungi. V. Nomenclatural bi  
 Castellano MA. 1995. NATS truffle and truffle-like fungi 4: *Amogaster viridigleba*  
 Cavender-Bares J, Izzo A, R Quercus 2 spp: Pezizales: / liiki, Tomentella 3 l  
 Cazares E, Garcia J, Castillo J, Trappe JM. 1992. Hypogeous fungi from n Genea, H  
 Cazares E, Smith JE. 1996. Occurrence of vesicular-arbuscular mycorrhizae in *Pseu*  
 Cazares E, Trappe JM. 1993. Vesicular endophytes in roots of the Pinaceae. Mycon  
 CBOL Plant Working Group. 2009. A DNA Barcode for land plants. Proc. Natl. Ac  
 Ceresini PC, Shaw HD, Vilgalys RJ, Cubeta MA. 2002. Genetic diversity of Rhizoc  
 Cerling TE, Hart JA, Hart TB. 2004. Stable isotope ecology in the Ituri forest. Oeco  
 Ceruti A, B Xeroc subtoment, Russula grisea, Hysterangium clathroides T  
 Cervinkova H. 1990. Mycorrhizae and control of root pathogen Heterobasidion ann  
 Chaffron S, Rehrauer H, Pernthaler J, von Mering C. 2010. A global network of coe  
 Chagnon P-L, Bradley RL, Klironomos JN. 2012. Using ecological network theory t  
 Chaia EE, Wall LG, Huss-Danell K. 2010. Life in soil by the actinorhizal nodule enc  
 Chakravarty A. 1999. Population genetics—making sense out of sequence. Nature C  
 Chalot M, Brun A. 1998. Physiology of organic nitrogen acquisition by ectomycorrh  
 Chalot M, Javelle A, Blaudez D, Lambilliotte R, Cooke R, Sentenac H, Wipf D, Boti  
 Chalot M, Kytöviita MM, Brun A, Finlay RD, Söderström B. 1995. Factors affectin  
 Chambers SM, Burke RM, Brooks PR, Cairney JWG. 1999. Molecular and biochen  
 Chambers SM, Curlevski NJ endof AUS  
 Chambers SM, Hitchcock C: Pisonia grandis: 2 2 liiki Thelephoraceae 7 Au  
 Chambers S Pisonia-thelephoroid  
 Chandler DP, Newton GJ, Small JA, Daly DS. 2003. Sequence versus structure for t  
 Chapela IH, Garbelotto M. 2004. Phylogeography and evolution in matsutake and cl  
 Chapela IH, Osher LJ, Horto Pinus radiata plar Suillus luteus Suillus vi  
 Chapman B, Xiao G. 2000. Inoculation of stumps with *Hypholoma fasciculare* as a f  
 Chapman WK, Berch SM, Ballard TM. 1990. In vitro growth of ectomycorrhizal fu  
 Chase MW, Fay M. 2009. Barcoding of plants and fungi. Science 325: 682-683.  
 Chatar paul L, Chakravarty P, Subramaniam P. 1989. Studies in tetrapartite symbiose  
 Chaudhary VB, Walters LL, Bever JD, Hoeksema JD, Wilson GWT. 2010. Advanci  
 Chen DM, Bastias BA, Taylor AFS, Cairney JWG. 2003. Identification of laccase-li  
 Chen DM, Cairney JWG. 20 ECM seente EMI enne põlengut: EcM seened: Theleph  
 Chen DM, Ellul S, Herdman K, Cairney JWG. 2001. Influence of salinity of biomas:

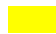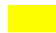

p/cd

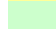

p/cd

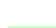

p/cd

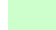

cd

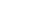

p/cd

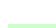

cd

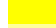

p

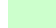

p



p

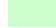

p



p/cd

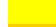

x

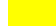

p



cd

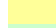

p

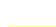

2

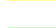

p



cd



p/cd

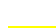

p

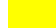

cd

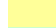

p



b

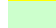

p/cd



p/cd

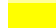

p/cd

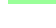

p/cd

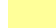

p/cd



cd

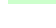

cd

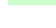

cd

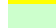

cd



cd



cd



cd



cd

Chen DM, Taylor AFS, Burke RM, Cairney JWG. 2001. Identification of genes for  
Chen J-H, Sun H, Wen J, Yang Y-P. 2010. Molecular phylogeny of Salix L. (Salicac  
Chen L, Liu J, Yao G, Yan W. 2008. Genetic diversity of Frankia strains in root nod  
Chen S, Yao H, Han J, Liu C, Song J, Shi L, Zhu Y, Ma X, Gao T, Pang X, Luo K,  
Chen YL, Brundrett MC, Dell B. 2000. Effects of ectomycorrhizas and vesicular-art  
Chen YL, Kang LH, Malajczuk N, Dell B. 2006. Selecting ectomycorrhizal fungi fo  
Chen YL, Liu S, Dell B. 200 Eukalüpti istandil Scleroderma , Pisolithus, li Sclerode  
Chen Z, Li J. 2004. Phylogenetics and biogeography of Alnus (Betulaceae) inferred  
Chen Z-D, Manchester SR, Sun H-Y. 1999. Phylogeny and evolution of the Betulac  
Cheung VG, Morley M, Aguilar F, Massimi A, Kucherlapati R, Childs G. 1999. Ma  
Chidumayo E, Gambiza J, Grundy I. 1996. Managing miombo woodlands. In: Camp  
Chidumayo EN, Kwibisa L. 2003. Effects of deforestation on grass biomass and soil  
Chidumayo EN. 2002. Changes in miombo woodland structure under different land t  
Chilvers GA, Burdon JJ. 1983. Further studies on a native Australian eucalypt forest  
Chilvers GA, Lapeyrie FF, Horan DP. 1987. Ectomycorrhizal vs endomycorrhizal fu  
Chilvers GA eukalüpti juurte ja mükorisade ülesehitus. MR tek er paksu huumuse vt  
Chilvers GA terminid synanchyma, felt ja net prosenchyma. Eukalüpi EcM 8 morfoti  
Chilvers GA. 1972. Tree root pattern in a mixed eucalypt forest. Aust. J. Bot. 20: 22  
Chilvers GA. 1973. Host range of some eucalypt mycorrhizal fungi. Aust. J. Bot. 21  
Chilvers GA Eukalüpidel ülevaade  
China BOL Group. 2011. Comparative analysis of a large dataset indicates that inter  
Chittibabu CV, Parthasarathy N. 2001. Liana diversity and host relationships in a trc  
Cho J-C, Tiedje JM. 2001. Bacterial species determination from DNA-DNA hybridi  
Chow C-E T, Kim DY, Sachdeva R, Caron DA, Fuhrman JA. 2014. Topp-down cor  
Chow CET, Kim DY, Sachdeva R, Caron DA, Fuhrman JA. 2014. Top-down contr  
Christan J, Hahn Ch. 2005. Zur Systematik der Gattung Ramaria (Basidiomycota, G  
Christoph H. 1921. Untersuchungen über die mykotrophen Verhältnisse der "Ericale  
Christy EJ, 6 tüüpi CWDst CWDs Cenococcum, Piloderma  
Chu H, Fierer N, Lauber CL, Caporaso JG, Knight R, Grogan P. 2010. Soil bacteria  
Chu-Chou M, Grace LJ. 1979. Endogone flammicorona as a mycorrhizal symbiont c  
Chu-Chou M Hydngangium carneum EcM obs eukalüptil ja Nothofagusel N.  
Chu-Chou M Tuberi identifitseerimine juurtel puhaskultuuri baasil (NZL P:  
Chu-Chou M, Grace LJ. 1985. Comparative efficiency of the mycorrhizal fungi Lacc  
Chu-Chou M Tuber ja Endogc Tuber Uus-Meremaal eriti sage taimlates  
Chung H, Zak DR, Lilleskov mullaseened haavikus Co2 ja O3 tõusu mõju: CO2: ko  
Chung MG, Kang SK. 1996. Allozyme genetic and clonal diversity within populatio  
Chutima R, Dell B, Vessabutr S, Bussaban B, Lumyong S. 2011. Endophytic fungi f  
Claridge AW, Cork SJ, Trappe JM. 1999. Diversity and habitat relationshi maasisesi  
Claridge AW, Tanton MT, S EcM seened potoroositas: palju liike, eriti kandseened  
Claridge AW, Trappe JM. 2005. Sporocarp mycophagy: Nutritional, behavioral, evc  
Claridge AW, Trappe JM, Castellano MA. 2001. Australian truffle-like fungi. X. G  
Clark DA, Brown S, Kicklighter DW, Chambers JQ, Thomlinson JR, Ni J. 2001. M  
Clarke KR. 1993. Non-parametric multivariate analysis of changes in community str  
Clemmensen KA, Michelsen Salix herbacea x j Tom stuposat palju rohkem peale väe  
Clemmensen KE, Bahr A, O SWE, HUUMUSKIHIS sügavuti 1 m: ül 5 cm :  
Clemmensen KE, Finlay RD. sügavuti org-hi seenekooslused muutuvad süga  
Clemmensen KE, Michelsen A, Jonasson S, Shaver GR. 2006. Increased ectomycor  
Clemmensen KE, Sorensen PL, Michelsen A, Jonasson S, Ström L. 2008. Site-depe  
Cline E, Vinyard B, Edmond Pseudotsuga seen Läh: Russ. Nigricans, Rhiz Rudus, R  
Cline ET, Ammirati JF, Edm Pseudotsuga: noo taimla: Tuber sp., Rhizopogon rudus.  
Cline ET. 2004. Mycorrhizal Pseudotsuga 3 säilikpuul eri aladel 10 proovis:  
Cline MS, Smoot M, Serami E, Kuchinsky A, Landys N, Workman C and 26 others  
Co-David D, Langeveld D, Noordeeloos ME. 2009. Molecular phylogeny and spore  
Cohan FM. 2002. What are bacterial species? Annu. Rev. Microbiol. 56: 457-487.  
Cohen R, Hadar Y, Yarden O. 2001. Transcript and activity levels of different Pleur  
Coince A, Cael O, Bach C, I mullaproovideest analüüs on sama efektiivne ku  
Coince A, Cordier T, Lengelle J, Defosse E, Vacher C, Robin C, Bueé M, Marcais  
Cole JR, Wang Q, CardenasE, Fish J, Chai B, Farris RJ, Kulam-Syed-Mohideen AS  
Cole L, Orlovich DA, Ashford AE. 1998. Structure, function, and motility of vacuol  
Coleman AW. 2009. Is there a molecular key to the level of 'biological species' in eu  
Colgan W, Carey AB, Trappe JM, Molina R, Thysell D. 1999. Diversity a hüpogetili  
Colgan W, Castellano MA, Bougher NL. 1995. NATS truffle and truffle-like fungi 2  
Colinas C, Molina R, Trappe metsaistandikus Telephora, Rhizopogon, Cenococcu  
Collier FA, Bidartondo MI. : Betula ja Pinus Betula: Lacc proxima, Thel terr  
Collins Johnson N, Wilson GWT, Miller RM, Bowker MA. 2015. Mycorrhizal pher  
Collins RA, Cruickshank RH. 2013. The seven deadly sins of DNA barcoding. Mol.  
Colpaert JV, Muller LAH, Lambaerts M, Adriaensen K, Vangronsveld J. 2004. Evo  
Colpaert JV, van Assche JA, Luijckens K. 1992. The growth of extramatricial mycelii



p/cd  
cd

p/cd  
p  
p  
cd

p/cd  
p/cd  
p  
cd  
cd  
cd  
p  
cd

p

p

cd  
p/cd

j

cd  
cd

p

p

p

p

p

p

p/cd

Crisp MD, Laffan S, Linder HP, Monro A. 2001. Endemism in the Australian flora. .  
Crisp MD. 2001. Historical biogeography and patterns of diversity in plants, algae a  
Crosby LD, Criddle CS. 2003. Understanding bias in microbial community analysis  
Crowther TW, Boddy L, Jones TH. 2011. Species-specific effects of soil fauna on fi  
Crowther TW, Maynard DS, **Seente ja bakterite Shannon BD** suurem rohum  
Cruz D, Suarez JP, Kottke I, Piepenbring M, Oberwinkler F. 2011. Defining species  
Cubero OF, Crespo A, Fatehi J, Bridge PD. 1999. DNA extraction and PCR amplifi  
Cuenoud P, Savolainen V, Chatrou LW, Powell M, Grayer RJ, Chase MW. 2002. M  
Cui M, Caldwell MM. 1996. Facilitation of plant phosphate acquisition by arbuscul  
Cui M, Caldwell MM. 1996. Facilitation of plant phosphate acquisition by arbuscul  
Cullen DW, Hirsch PR. 1998. Simple and rapid method for direct extraction of micr  
Cullings K, Courty P-E. 2009. Saprotrophic capabilities as functional traits to study  
**Cullings K, Ishkhanova G, Henson J. 2008. Defoliation effects on enzyme activities**  
**Cullings K, Raleigh C, New EMH** kuuse ja m: **Tylospora1, Tylospora2, Piloderma,**  
**Cullings K, Raleigh C, Vogl** kontroll: Cortinarius sp; infektsiooniga: Russula aff vin  
Cullings K. 2000. Peassessment of the phylogenetic relationships of some members  
Cullings KV, Makhija S. 2006. **Pinus contorta**; vs kuumaveeallikate ala: Dermocybe, Ir  
Cullings KV, Vogler DR, Pa **Pinus contorta**, Pi **Russula sp, Inocybe sp, Cort1, Cort2**  
Cullings KV, Vogler DR. 1998. A 5.8S nuclear ribosomal RNA gene sequence data  
Cullings KW, New MH, Ma **Pinus contorta**; vs **muidu: Suillus granulatus, Cortinaria**  
Cullings KW, Szaro TM, Bri **seenlillelistel: Pterospora andromeda: Rhizopogon sul**  
Cullings KW, Vogler DR, P: **männi-kuuse segi kontroll: Inocybe, Cortinarius; nylitu**  
**Cullings KW, Vogler DR. 1998. A 5.8S nuclear ribosomal RNA gene sequence data**  
Cullings KW. 1992. Design and testing of a plant-specific primer for ecological and  
Cullings KW. 1996. Single phylogenetic origin of ericoid mycorrhizae within the Eri  
Cunningham GH. 1948. New Zealand Polyporaceae. 6. The genus Coltricia **Coltricia**  
Curlevski N, Chambers SM, Anderson IC, Cairney JWG. 2009. Identical genotypes  
Curlevski NJA, Xu ZH, And **seeded AUS mullas: DGGE (59 OTU), RFLP (**  
Currah RS, Smreciu EA, Hambleton S. 1990. Mycorrhiza and mycorrhizal fungi of t  
Currah RS, Zelmer C. 1992. A key and notes to the genera of fungi mycorrhizal with  
Currie CR, Wong B, Stuart AE, Schultz TR, Rehner SA, Mueller UG, Sung G-H, Sj  
Currie DJ, Mittelbach GG, Cornell HV, Field R, Guegan JF, Hawkins BA, Kaufman  
Curtis TP, Sloan WT, Scann **prokariotoidide BD** arvutamine toetudes lognormaalsele  
Daft MJ, Okusanya BO. 1973. Effect of Endogone mycorrhiza on plant growth. V. I  
**Dahlberg A, xxx, kattuvus profiil, laanekuus kokku: Pilod fallax, Cenoc, xxx, 6 a j**  
Dahlberg A, Nikolova I, Johanson KJ. 1997. Intraspecific variation in 137Cs activity  
**Dahlberg A, xxx mänd; vs 2 raium Piloderma sp, Cortinarius q** loetletud  
Dahlberg A, Stenlid J. 1990. Population structure and dynamics in Suillus bovinus a  
Dahlberg A. 1990. Effect of s **istutuseelselt vs istutusjärgselt** lageraialeale  
**Dahlberg A. 1997. Population ecology of Suillus variegatus in old Swedish Suillus vs**  
**Dahlberg A. ülevaade, viited ülevaade, viited ülevaade.**  
Dahlgren RA, Singer MJ, Huang, X. 1997. Oak tree and grazing impacts on soil pro  
Dahlhöf I. 2002. Molecular c **erinevad PCR-1 p** põhinevad metoodikad -limitatsioonid,  
Dahlman M, Danell E, Spatafora JF. 2000. Molecular systematics of Craterellus: cla  
**Dahlström J Morchella spp:** puhaskultuuris ektendoMR õhukese mantli ja pooliku h  
Dähne J, Klingelhöfer D, Ott M, Rothe GM. 1995. Liming induced stimulation of th  
Dalpe Y. 1989. Ericoid mycorrhizal fungi in the Myxotrichaceae and Gymnoascaceae  
Danell E, F: **Cantharellus sp**  
Danell E. 1989. **Cantharellus cibarius**  
Danielsen L, Thürmer A, Mc **Populus hybr** seedned mullas vs juurtes. Juurtes s  
Danielson RM, Griffiths CL, Parkinson D. 1984. Effects of fertilization on the growi  
Danielson R x **Picea glauca** linn: E-strain, Hebeloma (ainus lihakaid vi  
Danielson R **Männil ja kuu männi- ja kuuse Alnus crispa: domin Alpova di**  
Danielson R x **kaevanduspinnas seente suksessioon eelinokuleeritud**  
Danielson RM, Visser. 1990. taimlates **eritaimlates ja erikaspuudel** väga eri  
Danielson R x **Picea glauca, turvas, karjäär**  
Danielson RM. 1979. Hypogeous ascomycetes in Alberta, Canada with tw **maasisesi**  
Danielson R **Wilcoxina-ekten**doMR mänd kultuuritunnused: jaotas klamüdosporoide  
Danielson R **Sphaerosporella brunnea** õhuke ECM enamusel puudel nii steriilses kui  
Danielson R **EcM lühikirjeldi vs teeserv vs põle sh Coltricia, Tricholoma eq vs teeser**  
**Danielson R kaevanduspinna kuusk vs mänd, ii 1,2 a: Thelephora, E-strain; 4a-Hebe**  
Dannemiller KC, Reeves D, Bibby K, Yamamoto N, Peccia J. 2013. Fungal high-thr  
Davey CB. 1971. Nonpathogenic Organisms Associated with Mycorrhizae. In: Hacs  
Davey M, Heegaard E, Halv **sammaldes seedned** vs aldituud: liigirikkusele po  
Davey ML, Currah RS. 2006. Interactions between mosses (Bryophyta) and fungi. C  
Davey ML, Currah RS. 2007. A new species of *Cladophialophora* (hyphomycetes)  
Davey ML, Heegaard E, Hal **sammaldel seedned:** sõltub v palju liigist, koest j  
Davies DM, Graves JD. 1998. Interactions between arbuscular mycorrhizal fungi an



p/cd  
cd  
cd  
p/cd

p/cd  
p/cd

cd  
cd

cd

p

p

p/cd

x

p

p/cd

p/cd

p/cd

p/cd

p/cd

p

p/cd

p/cd

p

p

p

p

Davies J, Briarty LG, Rieley J. 1973. Observations on the swollen lateral roots of th  
Davies TJ, Barraclough TG, Savolainen V, Chase MW. 2004. Environmental causes  
Davis CC, Bell CD, Mathews S, Donoghue MJ. 2002. Laurasian migration explains  
Davis CC, Webb CO, Wurdack KJ, Jaramillo CA, Donoghue MJ. 2005. Explosive I  
Davis EC, Franklin JB, Shaw AJ, Vilgalys R. 2003. Endophytic Xylaria (Xylariaceae  
Davis EC, Shaw J. 2008. Biogeographic and phylogenetic patterns in diversity of liv  
Dawson TE, Mambelli S, Plamboeck A, Templer PH, Tu KP. 2002. Stable isotopes  
Dayanandan S, Ashton PS, Williams SM, Primack RB. 1999. Phylogeny of the tropi  
de Aragon FM, Fischer C, Bonet JA, Olivera A, Oliach D, Colinas C. 2012. Econon  
de Carcer DA, Denman SE, McSweeney C, Morrison M. 2011. Evaluation of subsa  
De Deyn GB, van der Putten WH. 2005. Linking aboveground and belowground div  
De Deyn GD, Raaijmakers CE, Zoomer HR, Berg MP, de Rooter PC, Verhoef HA, l  
De Kesel A. 2001. A Mushroom dryer for the travelling mycologist. Field Mycology  
de la Bastide PY, Kropp BR, Piche Y. 1995. Vegetative interactions among mycelia  
De Luis M, Garcia-Cano MF, Cortina J, Raventos J, Gonzales-Hidalgo JC, Sanches  
De Meijer AAR. 2001. Mycological work in the Brazilian state of Parana. Brasiili  
de Miguel AM, de Roman M trühvli istanduste: Tuber väh 6 spp; Hymenog trühvli is  
de Miguel A Tuber spp, Tomentella galzinii, Tom substestacea  
de Queiroz A. 2005. The resurrection of oceanic dispersal in historical biogeography  
De Roman ! Quercirhiza cumulosa = Tomentella sp  
De Roman ! Quercirhiza stellata = Tomentella sp  
de Roman M, Boa E, Woodward S. 2006. Wild-gathered fungi for health and rural li  
de Roman M, Claveria V, de Miguel AM. 2005. A revision of the descriptions of ec  
de Vries FT, Liiri ME, Bjornlund L, Bowker MA, Christensen S, Setälä H, Bardgett  
de Wit P, Erseus C. 2010 Genetic variation and phylogeny of Scandinavian species  
de Wit R, Bouvier T. 2006. 'Everything is everywhere, but, the environment selects';  
Deacon JW, Donaldson SJ, Last FT. 1983. Sequences and interactions of mycorrhiz  
Deacon JW, Fleming LV. Interactions of Ectomycorrhizal Fungi.  
DeAngelis KM, Wu CH, Beller HR, Brodie EL, Chakraborty R, DeSantis TZ, Ande  
Dearnaley JDW, Brocque AF. 2006. Molecular identification of the primary root fur  
Dearnaley JDW, Martos F, Selsosse M-A. 2012. Orchid mycorrhizas: Molecular eco  
Dearnaley JDW. 2007. Further advances in orchid mycorrhizal research. Mycorrhiz  
Deasjardin DE. 2003. A unique ballistospore hypogeous sequestrate *Lactarius* from  
Debaud JC, Gay D. 1987. In vitro fruiting under controlled conditions of the ectomy  
Debaud JC, Hebeloma: mono vs dikaartionid-sama  
Debaud JC, Marmeisse R, Gay G. 1995. Intraspecific genetic variation and populati  
DeBellis T, Kernaghan G, Bi segametsas Kana Liikidest domin Piloderma I, Pilo2, P  
DeBellis T, Widden P, Messier C. 2002. Effects of selective cuts on the mycorrhizae  
DeBellis T, Widden P. 2006. Diversity of the small subunit ribosomal RNA gene of  
Degreef J, De Kesel A. 2008. Chalciaporus africanus, a new bolete species from Afri  
Degreef J, Eyindong H. 2007. *Gerronema hongo*, a comb. nov. for a poorly known  
Degreef J, Malaisse F, Rammeloo J, Baudart E. 1997. Edible mushrooms of the Zan  
Deharveng L. 2004. Recent advances in Collembola systematics. Pedobiologia 48: 4  
Dehlin H, Nilsson M-C, Wardle DA, Shevtsova A. 2004. Effects of shading and hur  
Dell B, Lumyong SR, Lumyong S. 2005. Ectomycorrhizal fungi in dry and Diptero  
Dell B, Mal Pisolithus ja Scleroderma sobivad Allocasuarina ja Eucalyptusega, ent e  
Dell B, Mal Mesophellia, Castorium: mükoriisad viljakehades ja mullas samasuguse  
Dell B, Mal Pisolithus Eukalüptil Hiinas. Eukalypti tyved, sissetoodud, me Eukalüpt  
Delmont TO, Robe P, Cecillon S, Clark IM, Constancias F, Simonet P, Hirsch PR, V  
Delwiche CC, Zinke PJ, Johnson CM, Virginia RA. 1978 Nitrogen isotope distributi  
Den Bakker HC, Zuccarello G, Kuyper TW, Noordeloos ME. 2007. Phylogeographi  
den Bakker HC, Zuccarello GC, Kuyper YW, Noordeloos ME. 2004. Evolution and  
Deng Y, Jiang Y-H, Yang Y, He Z, Luo F, Zhou J. 2012. Molecular ecological netw  
Dennis RWG. 1955. Fungi from Sierra Leone: Pezizales and Helotiales. Kew Bull. 1  
Dennis RWG. 1970. Fungus flora of Venezuela and adjacent countries. Ke Venezuel  
Dennis RWG. 1974. New or interesting British microfungi, III. Kew Bull. 30: 345-3  
Denny HJ, Ridge I. 1995. Fungal slime and its role in the mycorrhizal amelioration c  
Denny HJ, Wilkins DA. 1987. Zinc tolerance in Betula spp. III. Variation in respons  
Dentinger BTM, Ammirati JF, Both EE, Desjardin DE, Halling RE, Henkel TW, Mc  
Dentinger BTM, Didukh Mym Moncalvo J-M. 2011. Comparing COI and ITS as DI  
der van Linde S, Alexander I, Anderson IC. 2008. A PCR-based method for detectir  
DeSantis TZ, Hugenholtz P, Larsen N, Rojas M, Brodie EL, Keller K, Huber T, Dal  
DeSantis, T. Z., P. Hugenholtz, K. Keller, E. L. Brodie, N. Larsen, Y. M. Piceno, R.  
DeSantis, T. Z., P. Hugenholtz, N. Larsen, M. Rojas, E. L. Brodie, K. Keller, T. Hul  
Desdesvies Y, Legendre P, Azouzi L, Morand S. 2003. Quantifying phylogenetically  
Desiro A, Duckett JG, Press: Hornworts Bryophyta: juurtes nii GlomeroM ki  
Desjardin DE, Binder M, Roekring S, Flegel T. 2009. *Spongiforma*, a new genus of  
Desjardin DE, Wilson AW, Binder M. 2008. *Durianella*, a new gasteroid genus of l





cd  
 cd  
 cd  
 p/cd  
 cd  
 b  
 p  
 e  
 e  
 cd  
 cd  
 cd  
 j  
 p/cd  
 p/cd  
 cd  
 cd  
 j  
 p/cd  
 j  
 cd  
 p  
 p/cd  
 p  
 p  
 j  
 p/cd  
 p/cd  
 p/cd  
 cd  
 x  
 cd  
 p/cs  
 p  
 cd  
 cd  
 j

x

x

Dunabeitia MK, Rodriguez I. **taimlast istutatud** ja inokuleeritud kase, põõs: **Scleroder**  
 Dunbar J, Barns SM, Ticknor LO, Kuske CR. 2002. Empirical and theoretical bacte  
 Dunham SM, Kretzer A, Pfrender ME. 2003. Characterization of Pacific golden cha  
 Dunstan WA, Dell B; Malajc männiistandikus **Thelephora terrestris**, **Tom** **männiiste**  
 Duplessis S, Courty P-E, Tagu D, Martin F. 2005. Transcript patterns associated wit  
 Duponnois R, Garbaye J, Bo **istandikus: vs Laccaria**-inokuleeritud + MHB (teisi väh  
 Duponnois R, Kisa M, Prin Y, Ducouso M, Plenchette C, Lepage M, Galiana A. 20  
 Durall DM, Jones MD, Lewis KJ. 2005. Effects of forest management on fungal cor  
 Durall DM, Jones MD, Wrig **ebatsuga vs määr Thelephora** (männil 6x rohl vs metsat  
 Durall DM, Hebeloma, Laccaria  
 Durall DM, Todd AW, Trappe JM. 1994. Decomposition of 14C-labelled substrates  
 Dutilleul P, Legendre P. 1993. Spatial heterogeneity against heteroscedasticity: an e  
 Dutilleul P. 1993. Spatial heterogeneity and the design of ecological field experimen  
 Dutton MV, Evans C, Atkey PT, Wood DA. 1993. Oxalate production by basidiomy  
 Dutton MV, Evans C. 1996. Oxalate production by fungi: its role in pathogenicity ar  
 Duur K. Aanen1\*, Thomas W. Kuyper2, Alfons J. M. Debets AJM, Hoekstra RF. 20  
 Dynesius M, Jansson R. 2000. Evolutionary consequences of changes in species' ge  
 Dzwonko Z, Loster S. 1998. Dynamics of species richness and composition in a lim  
 Eastwood DC, Floudas D, Binder M, Majcherczyk A, Schneider P, Aerts A and 42  
 Eaton GK, Ayres MP. 2002. Plasticity and constraint in growth and protein minerali  
 Eberhardt U **Lactarius**  
 Eberhardt U **Tylospora**  
 Eberhardt U **Russula, Lactarius: ülevaade, areng**  
 Eberhardt U. 2010. A constr **ITS soovit seente DNA barcoding geeniks**  
 Eckburg PB, Bik EM, Berns **bakteritel inimese** soolestiku eripiirkondades: suurim ei  
 Eckenwalder JE. 1996. Systematics and Evolution of Populus. In: Stettler RF, Brads  
 Eckert AJ, Hall BD. 2006. Phylogeny, historical biogeography and patterns of diver  
 Edel-Hermann V, Dreumont C, Perez-Piqueres A, Steinberg C. 2004. Terminal restr  
 Edgar RC. 2010. Search and clustering orders of magnitude faster than BLAST. Nuc  
 Edgar RC. 2013. UPARSE: highly accurate OTU sequences from microbial amplico  
 Edgcomb VP, Beaudoin D, **(ookeanisetted: eukarüootidest domin seened, er**  
 Edman M, Gustafsson M, Stenlid J, Ericson L. 2004. Abundance and viability of fur  
 Edman M, Gustafsson M. 2003. Wood-disk traps provide a robust method for study  
 Edwards IP, Cripliver JL, Gi N-väetamise mõju: polevat  
 Edwards IP, Turco RF. 2005. Inter- and intraspecific resolution of nrDNA TRFLP as  
 Edwards IP, Zak DR, Kellner H, Eisenlord SD, Pregitzer KS. 2011. Simulated atmo  
 Edwards IP, Zak DR. 2011. **CO2 ja O3 vs peremees ja mulla horisont: Mul**  
 Edwards PJ. 1988. Effects of the fairy ring fungus *Agaricus arvensis* on nutrient avai  
 Edwards SG, Fitter AH, Young JPW. 1997. Quantification of an arbuscular mycorrh  
 Egerton-Warburton L, Allen MF. 2001. Endo- and ectomycorrhizas in *Quercus agrif*  
 Egger KN, Danielson RM, Fortin JA. 1991. Taxonomy and population structure of E  
 Egger KN, Hibbett DS. 2004. The evolutionary implications of exploitation in myco  
 Egger KN, Paden JW. 1986. Biotrophic associations between lodgepole pine seedlir  
 Egger KN, Paden JW. 1986. Pathogenicity of postfire ascomycetes (Pezizales). I  
 Egger KN. 1986. Substrate hydrolysis patterns of postfire ascomycetes (Pezizales). I  
 Egger KN. 1995. Molecular analysis of ectomycorrhizal fungal communities. Can. J.  
 Egger KN. 1996. Molecular systematics of E-strain mycorrhizal fungi: *Wilcoxina* ar  
 Egger KN. 2006. The surprising diversity of ascomycetous mycorrhizas. New Phyt  
 Ehrenfeld JG et al. 1997. JAMA. Ecology 78: 348-362.  
 Ehrenfeld JG. 2003. Effects of exotic plant invasions on soil nutrient cycling process  
 Eichorst SA, Kuske CR. 2012. Geographically and edaphically different Bacterial ar  
 Eidesen PB, Carlsen T, Molau U, Brochmann C. 2007. Repeatedly out of Beringia:  
 Eidesen PB, Ehrich D, Bakkestuen V, Alsos IG, Gilg O, Taberlet P, Brochmann C. :  
 Eilers KG, Debenport S, Anderson S, Fierer N. 2012. Digging deeper to find unique  
 Einsmann JC, Jones RH, Pu M, Mitchell RJ. 1999. Nutrient foraging traits in 10 co-  
 Eisenhauer N, Dobies T, Cesarz S, Hobbie SE, Meyer RJ, Worm K, Reich PB. 2011  
 Ek H, Andersson S, Arnebrant K, Söderström B. 1994. Growth and assimilation of  
 Ek H, Andersson S, Söderström B. 1996. Carbon and nitrogen flow in silver birch ar  
 Ek H. 1997. **The influence of nitrogen fertilization on the carbon economy of Paxillu**  
 Ek RC. 2003. Checklist of plants of the Mabura hill area, Central Guyana.  
 Ekblad A, Högborg P. 2001. Natural abundance of 13C in CO2 respired from forest :  
 Ekblad A, Huss-Danell K. 1995. Nitrogen fixation by *Alnus incana* and nitrogen tra  
 Ekblad A, Nyberg G, Högborg P. 2002. 13 C-discrimination during microbial respir  
 Ekblad A, **Vananemine**  
 Ekelund F, Rönn R, Christensen S. 2001. Distribution with depth of protozoa, bacte  
 Eklöf A, Jacob U, Kopp J, Bosch J, Castro-Urgal R, Chacoff NP et al. 2013. The di  
 Ekschmitt K, Griffiths BS. 1998. Soil biodiversity and its implications for ecosystem  
 El Abyad MSH, Webster J. 1968. Studies on pyrophilous discomycetes. I. Compara

j  
 cd  
 cd  
 cd  
 p/cd  
 p  
 p/cd  
 p/cd  
 p  
 p  
 p  
 p  
 cd  
 j  
 p  
 j  
 p/cd  
 p/cd  
 cd  
 p  
 p  
 cd  
 cd  
 cd  
 p  
 cd  
 p  
 p  
 p  
 p  
 1  
 cd  
 p/cd  
 cd  
 cd  
 ecd  
 p/cd  
 j  
 p/cd

x

El Abyad MSH, Webster J. 1968. Studies on pyrophilous discomycetes. II. Competi  
 El Fantroussi S, Urakawa H, Bernhard AE, Kelly JJ, Noble PA, Smidt H, Yershov C  
 El Karkouri K, Martin F, Mc Pinus pinea Rhizopogon rubescens  
 El Karkouri K, Seloise M-A, Mousain D. 2006. Molecular markers detecting an ect  
 Eldredge LE, Miller SE. 1995. How many species are there in Hawaii? http://www.1  
 Elkington TT. 1958. Biological flora of the British Isles. J. Ecol. 59: 887-905.  
 Elliott JC, Smith JE, Cromac Pseudotsuga men Russ-Lact (13), Piloderma (10) , Tor  
 Ellison A. 1996. An introduction to Bayesian inference for ecological research and e  
 Ellison CE, Hall C, Kowbel D, Welch J, Brem RB, Glass NL, Taylor JW. 2011. Poj  
 Ellstrand NC, Roose ML. 1987. Patterns of genotypic diversity in clonal plant speci  
 Emmerton KS, Callaghan TV, Jones HE, Leake JR, Michelsen A, Read DJ. 2001. A  
 Emmerton KS, Callaghan TV, Jones HE, Leake JR, Michelsen A, Read DJ. 2001. A  
 Englander L, Hull RJ. 1980. Reciprocal transfer of nutrients between ericaceous pla  
 English JT, Ploetz RC, Barnard RL. 1986. Seedling blight of longleaf pine caused by  
 Englund G, Cooper SD. 2003. Scale effects and extrapolation in ecological experim  
 Enquist BJ, Haskell JP, Tiffney BH. 2002. General patterns of taxonomic and bioma  
 Enquist BJ, Niklas KJ. 2001. Invariant scaling relations across tree-dominated comm  
 Entry JA, Rose CL, Cromack K. 1991. Litter decomposition and nutrient release in ε  
 Epstein S, Lopez-Garcia P. 2008. "Missing" protists: a molecular perspective. Biodi  
 Eriksson O, Kainulainen K. 2011. The evolutionary ecology of dust seeds. Persp. Pl  
 Eriksson O. 1993. The species-pool hypothesis nad plant community diversity. Oiko  
 Eriksson O. 2000. Functional roles of remnant plant populations in communities and  
 Erland S, Finlay R, Söderström B. 1991. The influence of substrate pH on carbon tr  
 Erland S, Finlay R. 1992. Effects of temperature and incubation time on the ability o  
 Erland S, Henrion B, Martin F, Glover LA, Alexander IJ. 1994. Identification of the  
 Erland S, Jo xxx, vastavus II 2 kuusikus Cenococcum, Thelephora, Tylospora  
 Erland S, Söderström B, Andersson S. 1990. Effects of liming on ectomycorrhizal fu  
 Erland S, Söderström B. 1990. Effects of liming on ectomycorrhizal fungi infecting I  
 Erland S, T: tomentelloidid  
 Erland S. 15 Tylospora Tylospora domin  
 Ernst WHO. 1988. Seed and seedling ecology of Brachystegia spiciformis , a predom  
 Erös-Honti Pachyphloeus spp  
 Erös-Honti Humaria ja Genea erinevate klaadide EcM vahel on rakkude suuruses st  
 Escudero A, Albert MJ, Pita JM, Perez-Garcia F. 2000. Inhibitory effects of Artemi  
 Escudero A, Somolinos RC, Olano JM, Rubio A. 1999. Factors controlling the esta  
 Etayo ML, de Miguel AM, d eri trühvliga nakat taimedel eri ecm kontaminandid 4 a  
 Etayo ML, Tuber spp,  
 Ettema CH, Wardle DA. 2002. Spatial soil ecology. Trends Ecol. Evol 17: 177-183.  
 Evans D. 2007. Soil nitrogen isotope composition. In: Michener R, Laljtha (eds). St  
 Evans RC, Campbell SC. 2002. The origin of apple subfamily (Maloideae, Rosacea  
 Ewaze JO, Al-Naama MM, Studies on nitrogen metabolism of Terfezia spp. and Thi  
 Excoffier L. 2004. Patterns of DNA sequence diversity and genetic structure after a  
 Exell AW. 1973. Angiosperms of the islands of the Gulf of Guinea (Fernando Po, Pr  
 Eyssartier G, Buyck B. 1998. Contribution a La Systematique du Genre Cantharellu  
 Eyssartier G, Buyck B. 2001. Notes on the Australian species described in the genus  
 Faeth SH, Fagan WF. 2002. Fungal endophytes: common host plant symbionts but u  
 Faeth SH. 2002. Are endophytic fungi defensive plant mutualists? Oikos 98: 25-36.  
 Fahey TJ. 1992. Mycorrhizae and forest ecosystems. Mycorrhiza 1: 83-89  
 Faith DP. 1992. Conservation evaluation and phylogenetic diversity. Biol. Conserv.  
 Faith JJ, Guruge L, Charbonneau M, Subramanian S, Seedorf H, Goodman AL, Clei  
 Farrelly V, Rainey FA, Stackebrandt E. 1995. Effect of genome size and rrm gene co  
 Fassi B, de Amphinema byssoides, Hebeloma hiemale, Tuber maculatum  
 Fassi B, Fontana A, Trappe JM. 1969. Mycorrhizae formed by Endogone Endogon  
 Fassi B, For Julbernardia ser Julbernardia seretiil Kongos 10 tüüpi. Eritüübid domin  
 Fassi B, For Caesalpinaceae-I Kongos  
 Fassi B, For Thelephora terrestris, Laccaria laccata et Hebeloma mesophaeum Pinus  
 Fassi B, Fontana A. 1967. Sintesi micorrizica tra Pinus strobus e Tuber maculatum  
 Fassi B. 1957. Ectomycorrhizes chez le Gnetum africanum Welw. Due a Gnetum  
 Faust K, Raes J. 2012. Microbial interactions: from networks to models. Nature Rev  
 Favis R, Day JP, Gerry NP, Phelan C, Narod S, Barany F. 2000. Universal DNA arr  
 Fazekas AJ, Burgess KS, Kesanakurti PR, Graham SW, Newmaster SG, Husband B  
 Feibelmann TP, Doudrick RL, Cibula WG, Bennett JW. 1997. Phylogenetic relation  
 Fell JW, Boekhout T, Fonseca A, Scorzetti G, Stanzell-Tallman A. 2000. Biodiversit  
 Fellbaum CR, Gachomo EW, Beesetty Y, Choudhari S, Strahan GD, Pfeffer PE, Kie  
 Fenice M, Giovannozzi G, Federici F, D'Annibale A. 2003. Submerged and solid-st  
 Ferdinandsen C, Winge Ö. 1925. Cenococcum Fr. A monographic study. Kgl. Veter  
 Ferdinandsen C, Winge Ö. 1925. Cenococcum graniforme: käsitus läbi ajaloo. Peetud fossiilid  
 Ferdman Y, Aviram S, Roth-Bejerano N, Trappe JM, Kagan-Zur V. 2005. Phylogen  
 Fernandes DN, Sanford RL. 1994. Effects of recent land-use practices on soil nutriti











2  
p/cd  
p  
cd  
p/cd  
p/cd  
p/cd  
p  
p/cd  
p/cd  
cd  
p/cd  
cd  
p/cd  
p/cd  
cd  
p  
p/cd  
p  
p/cd  
p/cd  
cd  
cd  
cd  
p  
p/cd  
cd  
cd  
p

x  
x

Goodman D xxx vana vs 90 a: ei erine  
 Goodman D xxx CWD vs O vs A; CWD: Cenoc, Piloderma, muu orgaa  
 Goodman SM, Benstead JP. 2003. The Natural History of Madagascar. The Univers  
 Göransson H, Wallander H, Ingerslev M, Rosengren U. 2006. Estimating the relativ  
 Gordon GJ, Gehring C. 2011 Pezizales ARIZONA kuivades männikutes on pm  
 Gorissen A, Kuyper TW. 2000. Fungal species-specific responses of ectomycorrhiz  
 Goroshina TK, Zobotina LN, Kiseleva TM, Pruzhina EG. 1982. Characteristics of le  
 Gorzelak MA, Hambleton S, Massicotte HB. 2012. Community structure of ericoid  
 Goslee SC, Urban DL. 2007. The Ecodist package for dissimilarity-based analysis o  
 Gotelli NJ, Anderson MJ, Arita HT, Chao A, Colwell RK, Connolly SR and 15 othe  
 Gotelli NJ, Colwell RK. 2001 rarefaction: individi ja ala baasil, teisedused; liigirikkk  
 Gotelli NJ, Entsminger GL. 2009. EcoSim: Null models software for ecology. Versio  
 Gotelli NJ. 2000. Null models analysis of species co-occurrence patterns. Ecology 8  
 Goto BT, Maia LC. 2006. Contribution to the study of Endogonales in Brazil: the fir  
 Göttlicher SG, Taylor AFS, Grip H, Betson NR, Valinger E, Högberg MN, Högberg  
 Götz M, Nirenberg H, Krause S et al. 2006. Fungal endophytes in potato roots studi  
 Götz M, Nirenberg H, Kraus Kartulijuurtes. 2 : Kartulijuured: Verticillium dahliae, C  
 Gouy M, Guindon S, Gascuel O. 2010. SeaView version 4 : a multiplatform graphic  
 Gower ST, Krankina O, Olson RJ, Apps M, Linder S, Wang C. 2001. Net primary p  
 Grace JB, Anderson TM, Olf H, Scheiner SM. 2010. On the specification of structu  
 Graf F, Bru xxx: Salix herbacea Salix her  
 Graham PH. 2008. Ecology of the root-nodule bacteria of legumes. In: Dilworth MJ  
 Grand LF, Vernia CS. 2005? Biogeography and hosts of poroid decay fungi Hymenoc  
 Grand LF. 1971. Tuberculate Photinia glabra moodusrab ECM Cenococumiga ja tu  
 Graur D, Martin W. 2004. Reading the entrails of chickens: molecular timescales of  
 Gray ND, Head IM. 2001. Linking genetic identity and function in communities of u  
 Grebenc T, Rupnik M, Hacin J, Janc M, Kraigher H. 1999. A contribution to the stu  
 Green J, Bohannan BJ. 2006. Spatial scaling of microbial biodiversity. Trends Ecol.  
 Green JL, Bohannan BJM, Whitaker RJ. 2008. Microbial biogeography: from taxon  
 Green JL, Holmes AJ, West kottseente BD IT S1 pikkuse pol põhjal -on seot pindal  
 Green Tringe S, von Mering C, Kobayashi A, Salamov AA, Chen K, Chang HW, Pe  
 Grelet G-A, Johnson D, Paterson E, Anderson IC, Alexander IJ. 2009. Reciprocal c  
 Grelet G-A, Johnson D, Vralstad T, Alexander IJ, Anderson IC. 2010. New insights c  
 Grenville DJ, Peterson RL, Ashford AE. 1986. Synthesis in growth puches of mycor  
 Grgurinovic CA. 2001. Agaricales in Australasia. Aust. Syst. Bot. 14: 395-406.  
 Griffith G. 2004. The use of stable isotopes in fungal ecology. Mycologist 18: 177-1  
 Griffith GW, Easton GL, Jones AW. 2002. Ecology and diversity of waxcap (Hygro  
 Griffith NT, Barnett HL. 1967. Mycoparasitism by Basidiomycetes in culture. Myco  
 Griffiths RI, Whiteley AS, O'Donnell AG, Bailey MJ. 2000. Rapid method for coex  
 Griffiths RP, seenamatiid: Gaultieria, Hysterangium  
 Griffiths RP, Castellano MA, Caldwell BA. 1991. Ectomycorrhizal mats formed by  
 Grigoriev IV, Nikitin R, Haridas S, Kuo A, Ohm R, Otilar R, Riley R, Salamov  
 Grigoriev IV, Nordberg H, Shabalov I, Aerts A, Cantor M et al. 2012. The genome  
 Grogan HM, Adie BAT, Gaze RH, Challen MP, Mills PR. 2003. Double-stranded R  
 Grogan P, Baar J, Bruns TD. põlendikel; tuhk põlet lihtsalt: Russ1, Tuber, Wilcoxii  
 Gronbach E. 1988. Charakterisierung und Identifizierung von Ektomykorrhizen in ei  
 Grönberg H, Paulin L, Sen R. 2003. ITS probe development for specific detection of  
 Grossnickle SC, Reid CPP. 1983. Ectomycorrhiza formation and root development  
 Grubisha LC, Bergemann SE, Bruns TD. 2007. Host islands within the California N  
 Gruhn CM, Gruhn AV, Miller OK. 1992. Boletinus merulioides alters root morpl  
 Grünig CR, Duo A, Sieber TN. 2006. Population genetic analysis of Phialocephala f  
 Grünig CR, Linde CC, Sieber TN, Rogers SO. 2003. Development of single-copy R  
 Grünig CR, McDonald BA, Sieber TN, Rogers SO, Holdenrieder O. 2004. Evidenc  
 Grünig CR, Queloz V, Duó A, Sieber TN. 2009. Phylogeny of Phaeomollisia piceae  
 Grünig CR, Queloz V, Sieber TN, Holdenrieder O. 2008. Dark septate endophytes (  
 Grünig CR, Sieber TN, Holdenrieder O. 2001. Characterisation of dark septate endo  
 Grünig CR, Sieber TN, Rogers SO, Holdenrieder O. 2002. Genetic variability amon  
 Grünig CR, Sieber TN, Rogers SO, Holdenrieder O. 2002. Spatial distribution of da  
 Grünig CR, Sieber TN. 2005. Molecular and phenotypic description of the widespre  
 Gryndler M, Cerna L, Bukovska P, Hrselova H, Jansa J. 2014. Tuber aestivum assc  
 Gryndler M, Egertova Z, Soukupova L, Gryndlerova H, Borovicka J, Hrselova H. 20  
 Gryta H, Carriconde F, Charcosset J-Y, Jargeat P, Gardes M. 2006. Population dyna  
 Gryta H, Debaud J-C, Marmeisse R. 2000. Population dynamics of the syr Hebelom  
 Gueidan C, Villasenor CR, de Hoog GS, Gorbushina AA, Untereiner WA, Lutzoni F  
 Guerin-Laguette A, Conventi S, Ruiz G, Plassard C, Mousain D. 2003. The ectomyc  
 Guerin-Laguette A, Matsushita K, Kikuchi N, Iwase K, Lapeyrie F, Suzuk matsutak  
 Guerin-Laguette A, Plassard C, Mousain D. 2000. Effects of experimental condition  
 Guerin-Laguette A, Shindo K, Matsushita N, Suzuki K, Lapeyrie F. 2004. The myco

j  
cd  
p/cd  
cd  
cd  
cd  
p/cd

x

cd

cd

p/cd  
p/cd

cd  
cd

cd  
p/cd  
1  
ecd

cd

cd

cd

p/cd

p/cd  
j  
(cd)

p/cd

p/cd  
p/cd  
cd  
p  
p/cd

x

x

Guerin-Laguette A, Vaario L-M, Gill WM, Lapeyrie F, Matsushita N, Suzuki K. 2000. Guerin-Laguette A, Vaario L-M, Matsushita K, Shindo K, Suzuki K, Lapeyrie F. 2000. Gugerli F, Sperisen C, Büchler U, Brunner I, Brodbeck S, Palmer JD, Qiu Y-L. 2000. Guidot A, Debaud J-C, Effosse A, Marmeisse R. 2003. Below-ground distribution a Guidot A, Debaud J-C, Marr liigisisene vs viljakehad: sarnane, ent ECMst Hebelom Guidot A, Debaud J-C, Marmeisse R. 2002. Spatial distribution of the bel vs ECM Guidot A, Johannesson H, Dahlberg A, Stenlid J. 2003. Parental tracking i Daldinia Guidot A, Lumini E, Debaud IGS RFLP meetod geneti määramiseks ECMs Guidot A, Verner M-C, Debaud J-C, Marmeisse R. 2005. Intraspecific variation in t Guillot G, Rousset F. 2013. Dismantling the Mantel tests. Meth. Ecol. Evol. 4: 336– Guimaraes PR, Jordano P, Thompson JN. 2011. Evolution and coevolution in mutua Guimaraes PR, Rico-Gray V, Furtado dos Reis S, Thompson JN. 2006. Asymmetrie Guinberteau J, Ducamp M, Poitou N, Mamoun M, Olivier JM. 1990. Ecol männil, n Guindon S, Lethiec F, Duroux P, Gascuel O. 2005. PhyML Online - a web server fo Gulis V, Suberkropp K. 2003. Effect of inorganic nutrients on relative contributions Gunasekara RGA, Wijekoon R. 2005. Mushroom Story. Fungi of Sri Lanka. Univer. Gunatilleke CVS, Ashton PS. 1987. New light on the plant geography of Ceylon.II. Gunter LE, Kochert G, Giannasi DE. 1994. Phylogenetic relationships of the Juglandaceae Guo C, Dannemann M, Gasche R, Zeller B, Papen H, Polle A, Rennenberg H, Sim Guo D, Mitchell RJ, Withington JM, Fan P-P, Hendricks JJ. 2008. Endogenous and Guo LD, Hyde KD, Liew CY. 2000. Identification of endophytic fungi from Livistor Gurgel EE, Silva BDB, Baseia IG. 2008. New records of Scleroderma from Northea Guschin D, Yershov G, Zaslavsky A, Gemmel A, Shick V, Proudnikov D, Arenkov Guschin DY, Mobarrey BK, Proudnikov D, Stahl DA, Rittmann BE, Mirzabekov AD Gutierrez A, del Rio JC, Martinez MJ, Martinez AT. 2001. The biotechnological coi Gutierrez A Terfezia ja Picoa + Helianthemum: ektendomükoriisa mantliga või ilma. Guzman B, Vargas P. 2005. Systematics, character evolution, and biogeography of ( Guzman G, Miller OK, Lodge DJ, Baroni TJ. 2004. Scleroderma stellatum vs. Scl Ha H-C, Honda Y, Watanabe T, Kuwahara M. 2001. Production of manganese pero Haber E, Cruise JE. Generic limits in the Pyroloideae (Ericaceae). Can. J. Bot. 52: 8 Haber E. 1984. A comparative study of Pyrola minor x Pyrola asarifolia (Ericaceae) Hacquard S, Tisserant E, Brun A, Legue V, Martin F, Kohler A. 2013. Laser microd Haesckaylo E, Bruchet G. 1972. Hebelomas as mycorrhizal fungi. Bull. Torr. Bot. Cl Haesckaylo E, Palmer JG. 1955. Hymenomycetous species forming mycorrhizae with Haesckaylo E. 1953. Pure culture syntheses of pine mycorrhizae in Terra-Lite. Mycol Haesckaylo E. 1965. Thelephora terrestris and mycorrhizae of Virginia pine. For. Sc Haesckaylo E. 1972. Mycorrhiza: The Ultimate in Reciprocal Parasitism? BioScience Haesckaylo E. 1973. Dependence of mycorrhizal fungi on hosts. Bull. Torr. Bot. club Haegeman B, Hamelin J, Moriarty J, Neal P, Dushoff J, Weitz JS. 2013. Robust esti Haesckaylo E. 1972. Mycorrhiza: The ultimate in reciprocal parasitism? Proc. Am. In Hagemann S. 2002. An improved land surface parameter dataset for global and regio Hagerberg D, Wallander H. 2002. The impact of forest residue removal and wood a: Hagerman SM, Durall DM. 2. juurtega inokul et Wilcoxina, DSE Hagerman S xxx, põhiliste ki vs lageraie 3 a jooksul Hagerman SM, Jones MD. B raiesmiku gradier mets: Hebeloma, Cenoc, Amphinema Hagerman SM, Sakakibara S vädavad, et mitri Cenococcum ja Piloderma sp, Amph Hahn C, Christian J. 2002. Ramaria chocoensis sp. Nov., a gomphoid men Colombi Hahn Ch, Agerer R, Wanner G. 2000. Anatomische and ultrastrukturelle Analyse vo Hahn D. 2008. Polyphasic taxonomy of the genus Frankia. In: Pawlowski K, Newton Haimi J, Huhta V, Bouchelam M. 1992. Growth increase of birch seedlings under th Hajibabaei M, Janzen DH, Burns JM, Hallwachs W, Hebert PDN. 2006. DNA barc Halasz K, Bratek Z, Szegő D, Rudnoy S, Racs I, Lastity D, Trappe JM. 2005. Tests Hall IR, Yun W, Amicucci A. 2003. Cultivation of edible ectomycorrhizal mushroom Hall JB. 1973. Vegetational zones on the Southern slopes of Mount Cameroon. Ve. Hall RB, Mc Nabb, Jr. HS, Maynard CA, Green TL. 1979. Toward Development of Halldorsson G, Sverrisson H, Eyjolfsdottir GG, Oddsdottir ES. 2000. Ectomycorrhiz Hallen HE, Bougher NL, Lebel T. 2004. Phylogenetic placement of Ammarendia ar Hallenberg N, Küffer N. 2001. Long-distance spore dispersal in wood-inhabiting Ba Halling RE, Baroni TJ, Binder M. 2007. A new genus of Boletaceae from Eastern N Halling RE, Mitchell J, Nuhn B, Osmundson T, Fechtner N, Trappe JM, Soyong K, Halling RE, Nuhn M, Fechner NA, Osmundson TW, Soyong K, Arora D, Hibbett C Halling RE, Osmundson TW, Neves M-A. 2008. Pacific boletes: Implications for bi Hamady M, Lozupone C, Knight R. 2010. Fast Unifrac: facilitating high-throughput Hambleton S, Sigler L. 2005. Meliniomyces , a new anamorph genus for root-associ Hammarlund VC. 1923. Boletus elegans Schum. und Larix-Mykorrhiza. Bot. Not. Hammel B, Burger WG. 1991. Neither oak nor alder, but nearly: the history of Ticoc Hamzeh M, Dayanandan S. 2004. Phylogeny of Populus (Salicaceae) based on nucl Hamzeh'ee B, Naqinezhad A, Attar F, Ghahreman A, Assadi M. 2008. Phytosociol







p  
 p  
 cd  
 cd  
  
 cd  
  
 cd  
 p/cd  
  
 cd  
 cd  
 cd  
  
 e  
 e  
 e  
 p/cd  
 cd  
 p/cd  
 p/cd  
 p  
  
 p  
 cd  
 p/cs  
 p/cd  
  
 p/cd  
  
 p/cd  
 p/cd  
  
 cd  
 cd  
  
 cd  
 p/cd  
  
 cd  
 n  
 p  
 p  
  
 p  
  
 p  
 p  
 p  
 p/cd  
 p  
  
 p  
 p

x

Hobson KA, Welch HE. 1992. Determination of trophic relationships within a high  
 Hodge A, Campbell CD, Fitter AH. 2001. An arbuscular mycorrhizal fungus acceler  
 Hodge A. 2003. Plant nitrogen capture from organic matter as affected by spatial dis  
 Hodkinson ID, Webb NR, Coulson SJ. 2002. Primary community assembly on land  
 Hoeksema JD, Chaudhary VD, Gehring CA, Johnson NC, Karst J, Koide RT, Pringle  
 Hoeksema JD, Hernandez J. **MEX ja Calif: Pinus radiata resistant propagule**  
 Hoeksema JD, Kummel M. **ECM seente biod nulg varjus: Cenococcum**, valguses: :  
 Hoeksema JD, Piculell BJ, Thompson JN. 2009. Within-population genetic variabili  
 Hoeksema JD, Schwartz MW. 2003. Expanding comparative-advantage biological n  
 Hoeksema JD, Thompson JN. 2007. Geographic structure in a widespread plant-myc  
 Hoeksema JD. 2010. Ongoing coevolution in mycorrhizal interactions. New Phytol.  
 Hoff JA, Kloppenstein NB, McDonald GI, Tonn JR, Kim M-S, Zambino PJ, Hessbu  
 Hoffland E, Giesler R, Jongmans AG, van Breemen N. 2003. Feldspar tunneling by  
 Hoffland E, Giesler R, Jongmans T, van Breemen N. 2002. Increasing feldspar tunn  
 Hoffman MT, Arnold AE. 2008. Geographic locality and host identity shape fungal c  
 Hoffman MT, Arnold AE. 2010. Diverse bacteria inhabit living hyphae of phylogene  
 Hofrichter M, Vares T, Kalsi M, Galkin S, Scheibner K, Fritsche W, Hatakka A. 19  
 Hofrichter M, Ziegenhagen D, Vares T, Friedrich M, Jäger MG, Fritsche W, Hatak  
 Hofrichter M. 2002. Review: lignin conversion by manganese peroxidase. Enzyme. I  
 Hofstetter V, Clemencón H, Vilgalys R, Moncalvo J-M. 2002. Phylogenetic analyse  
 Högborg MN, Baath E, Nordgren A, Arnebrant K, Högborg P. 2003. Contrasting eff  
 Högborg MN, Briones MJI, Keel SG, Metcalfe DB, Campbell C, Midwood AJ, Tho  
 Högborg MN, Högborg P, **M boreaalset metsakõrgusgradient põhjustab N, pH jms gr**  
 Högborg MN, Högborg P. 2002. Extramatrical ectomycorrhizal mycelium contribute  
 Högborg P, Alexander IJ. 1995. Roles of root symbioses in African woodland and fo  
 Högborg P, Högborg MN, Quist ME, Ekblad A, Näsholm T. 1999. Nitrogen isotope  
 Högborg P, Högbom L, Schinkel H, Högborg M, Johannisson C, Wallmark H. 1996.  
 Högborg P, Högbom L, Schinkel H, Högborg M, Johannisson C, Wallmark H. 2004. I  
 Högborg P, Nordgren A, Ågren GI. 2002. Carbon allocation between tree root grow  
 Högborg P, Nordgren A, Buchmann N, Taylor AFS, Ekblad A, Högborg M, **väheneb**  
 Högborg P, Pearce GD. 1986. Mycorrhizas in Zambian trees in relation to host tax  
 Högborg P, Plamboeck AH, Taylor AFS, Fransson PAM. 1999. Natural <sup>15</sup>N **ECM vs.**  
 Högborg P, Read DJ. 2006. Towards a more plant physiological perspective on soil  
 Högborg P. 1982. Mycorrhizal associations in some woodland forest trees and shrub  
 Högborg P. 1986. Nitrogen-fixation and nutrient relations in savanna woodland trees  
 Högborg P. 1989. Root symbioses of trees in savannas. In: Proctor J. (ed). Mineral I  
 Högborg P. 1990. <sup>15</sup>N natural abundance as a possible marker of the ectomycorrhiz  
 Högborg P. 1992. Root symbioses of trees in African dry tropical forests. J. Veg. Sc  
 Högborg P. 1997. <sup>15</sup>N natural abundance in soil-plant systems. New Phytol. 137: 17  
 Hoiland K, Holst-Jensen A. 2000. **Cortinarius phylogeny and possible taxonomic ir**  
 Hold GL, Schwiertz A, Aminov RI, Blaut M, Flint HJ. 2003. Oligonucleotide probe:  
 Holder M, Lewis PO. 2003. Phylogeny estimation: traditional and Bayesian approach  
 Holmer L, Nitare L, Stenlid J. 1994. Population structure and decay pattern **Phellinus**  
 Holmer L, Stenlid J. 1993. The importance of inoculum size for the competitive abili  
 Holmer L, Stenlid J. 1997. Competitive hierarchies of wood decomposing basidiomy  
 Holst-Jensen A, Vaage M, Schumacher T, Johansen S. 1999. Structural characteristi  
 Holt RD, Lawton JH, Polis GA, Martinez ND. 1999. Trophic rank and the species-a  
 Hönig K, Riefler M, Kottke I. 2000. Survey of Paxillus involutus (Batsch) **ECM ja**  
 Hooper DU, Adair EC, Cardinale BJ, Byrnes JEK, Hungate BA, Matulich KA, Gon  
 Hopkins MS, Reddell P, Hewett RK, Graham AW. 1996. Comparison of root and n  
 Hopkins NA. 1987. Mycorrhizae in a California serpentine grassland community. C  
 Hopple JS, Vilgalys R. 1999. Phylogenetic relationships in the mushroom genus *Cop*  
 Horak E, Moser M. 1965. Fungi austroamerici VIII. Über neue Gastroboletaceae.  
 Horak E, Wood AE. 1990. Cortinarius Fr. (Agaricales) in Australasia. 1. Subgen. M  
 Horak E. 1967. Remarques critiques sur quelques champignons du Congo (Afrique).  
 Horak E. 1971. Contributions to the knowledge of the Agaricales s.l. (fungi) of New  
 Horak E. 1971. Studies on the genus *Descolea* Sing. Persoonia 6: 231-248.  
 Horak E. 1975. Boletellus and Porphyrellus in Papua New Guinea. Kew Bull. 31: 64.  
 Horak E. 1977. New and rare boletes from Chile. Boletín Sociedad Argentina de Bo  
 Horak E. 1979. Astrosporina (Agaricales) in Indomalaya and Australasia. Persoonia  
 Horak E. 1979. Three new genera of Agaricales from Papua New Guinea. Sydowia :  
 Horak E. 1983. Mycogeography in the South Pacific region: Agaricales, B. **Agaricale**  
 Horak E. 1990. Monograph of the New Zealand Hygrophoraceae. N. Z. J. Bot. 28: 2  
 Horak E. 1991. New records of Phaeocollybia from Colombia. Mycologia 83: 464-4  
 Horak E. Entoloma in South America. I. Institut Spezielle Botanik, ETHZ, CH-8092  
 Horan DP, Chilvers GA, Lapeyrie FF. 1988. Time sequence in the infection process  
 Horan DP, Chilvers GA. 1990. Chemotropism -the key to ectomycorrhizal formatio  
 Horn S, Caruso T, Verbruggen E, Rillig MC, Hempel S. 2014. Arbuscular mycorrhiz





1  
p/cd  
p/cd  
p/cd  
p  
p  
cd  
cd  
p/cd  
p/cd  
p  
p  
p/cd  
VIT/ED  
p/cd  
p/cd  
p/cd  
p/cd  
p  
p/cd  
cd  
p  
p  
p  
2011 9  
p/cd  
p  
p/cd  
p  
p/cd  
p  
cd  
p  
p/cd  
p/cd  
p/cd

x

Hynes MM, Smith ME, Zasc **CAL Quercus EMH**: domin risomorfidega liigi  
Hynson N, Bruns TD. 2010. Fungal hosts for mycoheterotrophic plants: a non-exclu  
Hynson N, Merckx VSFT, P Hawaii määndic Suillus, Wilcoxina, Tomentella,  
Hynson NA, Bruns TD. 2009. *Pyrola aphylla* Piloderma, Phialocephala  
Hynson NA, Mambelli SA, Amend AS, Dawson TE. 2012. Measuring carbon gains  
Hynson NA, Weiß M, Preiss K, Gebauer G, Treseder KK. 2013. Fungal host specifi  
Hyodo F, Kohzu A, Tayasu I. 2010. Linking aboveground and belowground food we  
Jason GR, Lennon JJ, Pakeman RJ, Thoss V, Beaton JK, Sim DA, Elston DA. 2005  
Illyes Z, Ouanphanivanh N, Rudnoy S, Orczan AK, Bratek Z. 2010. The most recen  
Illyes Z, Halasz K, Rudnoy S, Ounphanivanh N, Garay T, Bratek Z. 2010. Changes  
Imamura A, Yumoto T. 2008. Dynamics of fruit-body production and mycorrhiza of  
Imhof S. 2006. Two distinct fungi colonize roots and rhizomes of the myco-heterotr  
Ingelby K. 1999. *Scleroderma sinnamarense* Mont. + *Gnetum africanum* Welw. De  
Ingelby K, Last FT, Mason F 1 -30 cm, söekae ülakihis Paxillus, alakihis Scleroder  
Ingelby K, Mason PA, Last FT, Fleming LV. 1990. Identification of Ectomycorrhiza  
Ingelby K, 1 **Thelephora terrestris** eukalüptil  
Ingelby K, 1 **Riessia -Shorea Shorea parviflora kõikjal Riessia, metsas ja raialal eri**  
Innis MA, Gelfand DH. 1990. Optimization of PCRs. In: Innis MA, Gelfand DH. (e  
Iosifidou P, Raidl S. 2006. *Clavariadelphus pistillar* + *Fagus sylvatica*. Descr. Ec  
Iotti M, Amicucci A, Stocchi V, Zambonelli A. 2002. Morphological and molecular  
Iotti M, Lancellotti E, Hall II **Truffiere: Pinu Tom-thel, Inoc, Russ**  
Irie T, Honda Y, Watanabe T, Kuwahara T. 2000. Homologous expression of recom  
Irwin MJ, Bougoure JJ, Dearnaley JDW. 2007. *Pterostylis nutans* (Orchidaceae) ha  
Ishida TA, Nara K, Hogetsu **segametsades (2) Cenococcum, Sebacina1, AscoM8 (1**  
Ishida TA, Nara K, Ma S, T: **Salix linearistij Tomentella 3 spp; Geopora 1 dc**  
Ishida TA, Nordin A. 2010. No evidence that nitrogen enrichment affect fungal com  
Isogai N, Yamamura Y, Mariko S, Nakano T. 2003. Seasonal pattern of photosynth  
Ives AR, Foufopoulos J, Klopfer ED, Klug JL, Palmer TM. 1996. Bottle or big-scal  
Ives AR, Godfray ACJ. 2006. Phylogenetic analysis of trophic associations. Am. Na  
Iwamoto K, Kitayama K. 20 **Borneo Mt Kinabalu mööda kõrgusgradienti: 7**  
Iwanski M, Rudawska M. 20 **huumus (palju liit) Huumuspinnas: Cadophora** finlandic  
Iwase K. 1992. Induction of basidiospore germination by gluconic acid in the ectom  
Izumi H, Anderson IC, Alexander IJ, Killham K, Moore ERB. 2006. Diversity and e  
Izumi H, Moore ERB, Killham K, Alexander IJ, Anderson IC. 2006. Characterisatio  
Izzo A, Agbowo J, Bruns T **Abies spp Sierra Cenococcum, Wilcoxina, Lactarius, 1**  
Izzo A, Canright M, Bruns T **Pinus jeffreyi: mu kontr: Wilcoxina, Rhizop roseolus, C**  
Izzo A, Meyer M, Trappe JN **leidsid juurtel palju maasiseste viljakehadega v palju lii**  
Izzo A, Nguyen DT, Bruns T **kuivatatud mullal määnd: Wilcoxina rehmi, Rhiz roseol**  
Jablonski D, Roy K, Valentine AW. 2006. Out of the tropics: evolutionary dynamics  
Jablonski D, Sepkoski JJ. 1996. Paleobiology, community ecology, and scales of ec  
Jackson CR et al. 1997. A Simple, efficient method for the separation of humic subs  
Jacobs A, Coetzee MPA, Wingfield BD, Jacobs K, Wingfield MJ. 2003. Phylogenet  
Jacobs BF. 2004. Palaeotropical studies from tropical Africa: relevance to the evol  
Jacobson KM, Miller OK, Turner BJ. 1993. Randomly amplified polymor **Suillus gr**  
Jacobson KM, Miller OK. 1992. Physiological variation between tree-associated po  
Jacquemyn H, Brys R, Honnay O, Roldan-Ruiz I, Lievens B, Wiegand T. 2012. Nor  
Jacquemyn H, De Ja A, De hert K, Bailarote BC, Lievens B. 2012. Variation in mycc  
Jacquemyn H, Honnay O, Cammue BPA, Brys R, Lievens B. 2010. Low specificity  
Jacquemyn H, Merckx V, Brys R, Tyteca D, Cammue BPA, Honnay O, Lievens B. :  
Jäderlund. 2001. Bilberry (*Vaccinium myrtillus* L.) in a boreal forest ecosystem -effe  
Jaffee PA. 1996. Soil microcosms and the population biology of nematophagous fun  
Jairus T, Mpumba R, Chinoya S, Tedersoo L. 2011. Invasion potential and host shif  
Jakobsen I. 2004. Hyphal fusion to plant species connections -giant mycelia and con  
Jakucs E, B **Genea verrucosa**  
Jakucs E, Erös-Honti Z. 2009. **Tomentella spp. jt Tomentelloidsed morfortüübi**  
Jakucs E, K **Tomentella stuposa 2 alatüüpi, mis morf pooldest veidi erinevad [voib-ol]**  
Jakucs E, K **Tomentella ferru** Ungari tasandiku vaid Tomentella analüüsitud: enamas  
Jakucs E. 14 **Fagirhiza vermiculariformis = Lactarius sp**  
James SE, Pärtel M, Wilson SD, Peltzer DA. 2003. Temporal heterogeneity of soil r  
James TJ, Moncalvo J-M, Li S, Vilgalys R. 2001. Polymorphism at the ribosomal D  
James TY, Berbee ML. 2011. No jacket required - new fungal lineage defies dress c  
James TY, Kauff F, Schoch CL and 68 others. 2006. Reconstructing the early evol  
Janos DP. 1980. Mycorrhizae and tropical succession. *Biotropica* QQQ: 56-64.  
Jansa J, Mozafar A, Banke S, McDonald BA, Frossard E. 2002. Intra- and interspor  
Jansa J, Smith FA, Smith SE. 2008. Are there benefits of simultaneous root coloniza  
Janse JM. 1897. Les endophytes radicaux de quelques plantes javanaises. *Ann. Jard*  
Jansson R, Rodriguez-Castaneda G, Harding LE. 2013. What can multiple phylogen



p  
 p/cd  
 p/cd  
 b  
 p  
 p/cd  
 j  
 p  
 cd  
 p/cd  
 p  
 p  
 p  
 cd  
 cd  
 p/cd  
 p/cd  
 p/cd  
 p  
 cd  
 x  
 cd  
 p/cd  
 p/cd  
 p/cd  
 p  
 cd  
 x  
 p/cd  
 p  
 j  
 j  
 p  
 p/cd  
 j  
 p  
 p/cd

Jülich W. 1981. *Riessia*, *Riessia*lla koos suure ümara kuni nelja-pallise tipuga tsüstiidide  
 Julou T, Burghardt B, Gebau *Cephalanthera* da OrM: *Cephalanthera dama*sonium rol  
 Julou T, Burghardt B, Gebauer G, Berveiller D, Damesin C, Selosse M-A. 2005. Mi  
 Jumpponen A, Egerton-Warburton LM. 2005. Mycorrhizal fungi in successional env  
 Jumpponen A, Högberg P, Huss-Danell K, Mulder CPH. 2002. Interspecific and spa  
 Jumpponen A, Johnson LC. 2002. Seened mullas vs *EmH*: domin. Kottseened, juurtes sul  
 Jumpponen A, Jones KL. 2002. Preeriamullas vs kõrgendatud temp ja madalam  
 Jumpponen A, Newsham KK, Neises DJ. 2003. Filamentous ascomycetes inhabiting  
 Jumpponen A. 1999. Spatial distribution of discrete RAPD phenotypes of a root end  
 Jumpponen A. 2003. Soil fungal community assembly in a primary success: *seente B*  
 Jumpponen A. 2007. Soil fungal communities underneath willow canopies on a prim  
 Jun Sul W, Oliver TA, Ducklow HW, Amaral-Zettler LA, Sogin ML. 2013. Marine  
 Junk WJ. 1984. Ecology of the várzea, floodplain of Amazonian white-water rivers.  
 Jurgensen MF, Graham RT, Larsen MJ, Harvey AE. 1992. Clear-cutting, woody res  
 Jurgensen MF, Harvey AE, Graham RT, Page-Dumroese DS, Tonn JR, Larsen MJ, .  
 Kadowaki K, Sato H, Yamamoto S, Tanabe AS, Hidaka A, Toju H. 2014. Detection  
 Kagan-Zur V, Freeman S, Li Tammeistandus ii 4 a jooksul mitmed uued seened, san  
 Kagan-Zur V, Kuang J, Tabak S, Taylor FW, Roth-Bejerano N. 1999. Potential veri  
 Kaiser C, Kilburn MR, Clode PL, Fuchslueger L, Koranda M, Cliff JB, Solaiman Z  
 Kaiser C, Koranda M, Kitzler B, Fuchslueger L, Schenker J, Schweiger P, Rasche F  
 Kalamees R, Zobel M. 2002. The role of the seed bank in gap regeneration in a calc  
 Kaldorf M, xxx transgeensees haav unknown  
 Kaldorf M, haava kloonide (haava kloonide d) *Tomentella ellisii*, *Phialocephala*, *Lac*  
 Kanagawa T. 2003. Bias and artifacts in multitemplate polymerase chain reactions (I  
 Kanchanaprayudh J, Lian C, Zhou Z, Hogetsu T, Sihanonth P. 2002. Polymorphic m  
 Kanchanaprayudh J, Zhou Z, Eucalyptus car *Eucalyptus camaldulensis* TALS  
 Kanchanaprayudh J, Zhou Z, Yomyart S, Sihanonth P, Hogetsu T. 2003. Molecular  
 Kaneko N, Salamanca E. 1999. Mixed leaf litter effects on decomposition rates and  
 Kang S, Mansfield MA, Park B, Geiser DM, Ivors KL, Coffey MD, Grünwald NJ, M  
 Kang SS, Chung MG. 1997. Spatial genetic structure in populations of *Chimaphila* j  
 Kanunfire CC, Zancan GT. 1998. Physiology of exolaccase production by *Thelephor*  
 Kaounas V, Assiyov B, Alvarado P. 2011. New data on hypogeous fungi from Greece  
 Kardol P, Bezemer TM, van der Putten WH. 2006. Temporal variation in plant-soil i  
 Karen O, Högberg N, Dahlberg A, Jonsson L, Nylund J-E. 1997. Inter-and *RFLP*: lii  
 Karlsson M, Olson Å, Stenlid J. 2003. Expressed sequences from the basidiomyceto  
 Karpati AS, Handel SN, Dig *Quercus seemi*kutel: NJ USA linnas vs maal: rr  
 Karpouzias DG, Rousidou C, Papadopoulou KK, Bekris F, Zervakis GI, Singh BK, I  
 Karst J, Jones MD, Turkington R. 2008. Ectomycorrhizal colonization and intraspec  
 Karst J, Marczak L, Jones MD, Turkington R. 2008. The mutualism-parasitism cont  
 Kartzinel T, Trapnell DW, Shefferson RP. 2013. Highly diverse and spatially hetero  
 Kasesalu A. 1993. Nature Reserve District Stands and Their Dynamics in Järvselja.  
 Kaspari M, Yanoviak SP. 2008. Biogeography of litter depth in tropical forests: eval  
 Kasuya MCM, Igarashi T. 1996. In vitro ectomycorrhizal formation in *Picea glehnii*  
 Kataoka R, Taniguchi T, Ooshima H, Futai K. *Pinus thunbergii*: *Cenoc*, *Amphinema*  
 Katenin AE. 1972. Mikoriza rastenii severo-vostoka evropeiskoi chastii USSR. Izd. .  
 Kathriarachchi H, HoVmamm P, Samuel R, Wurdack KJ. 2005. Molecular phylogene  
 Katoh K, Frith MC. 2012. Adding unaligned sequences into an existing alignment us  
 Katoh K, Kuma K, Toh H, Miyata T. 2005. MAFFT version 5: improvement in accu  
 Katoh K, Standley DM. 2013. MAFFT multiple sequence alignment software versio  
 Katoh K, Toh H. 2008. Recent developments in the MAFFT multiple sequence align  
 Kauff F, Cox CJ, Lutzoni F. 2007. WASABI: an automated sequence processing sys  
 Kauffman C Cortinari mood EcM tammega kui jälgida risomorfe (väide)  
 Kauserud H, Heegaard E, Halvorsen R, Boddy L, Hoiland K, Stenseth NC. 2010. M  
 Kauserud H, Mathiesen C, Olson M. 2008. High diversity of fungi associated with li  
 Kauserud H, Schumacher T. 2002. Population structure of the endangered wood dec  
 Kauserud H, Schumacher T. 2003. Genetic structure of Fennoscandian por *Fomitops*  
 Kauserud H, Schumacher T. 2003. Regional and local population structure of the pic  
 Kauserud H, Schumacher T. 2003. Ribosomal DNA variation, recombination and inl  
 Kauserud H, Svegarden IB, DeCock C, Hallenberg N. 2007. Hybridization among c  
 Kauserud H, Svegarden IB, Decock T, Hallenberg N. 2007. Hybridization among cr  
 Kawai M. 1997. Artificial ectomycorrhiza formation of roots of air-layered *Pinus de*  
 Kawai M. 1997. Artificial ectomycorrhiza formation on roots of air-layered *Pinus de*  
 Keating KA, Quinn JF. 1998. liigirikkkuse modeleerimine Michaelis-Mentenii kõvera  
 Keller G. 1996. Utilization of organic and inorganic nitrogen sources by high-alpine  
 Kellermann J, Udovicic F, Ladiges PY. 2005. Phylogenetic analysis and generic limi  
 Kellner H, Vandenbol M. 2010. Fungi unearthed: transcripts encoding lignocelluloly  
 Kembel SW, Cowan PD, Helmus MR, Cornwell WK, Morlon H, Ackerly DD, Blon




  
 p/cd
   
 p
   
 cd
   
  
 p/cd
   
  
 p/cd x
   
 p/cd
   
 p/cd
   
 p/cd
   
2011 13
   
 cd
   
  
 cd
   
  
 p/cd
   
 p/cd
   
 cd
   
 p
   
 cd
   
 p/cd
   
 cd
   
 p
   
 cd
   
  
 2
   
2005 229
   
  
 p
   
 p/cd
   
 p/cd
   
 p/cd
   

  
  
 cd
   
  
 p/cd
   
 p/cd
   
 p/cd
   
  
 p/cd
   
 p

Kluger CG, Dalling JW, Gallery RE, Sanchez E, Weeks-Galindo C, Arnold AE. 2006. Knights D, Kuczynski J, Charlson ES, Zaneveld J, Mozer MC, Collman RG, Bushm Knowles LL, Maddison WP. 2002. Statistical phylogeography. *Mol. Ecol.* 11: 2623-2633. Knowles LL. 2009. Statistical phylogeography. *Annu. Rev. Ecol. Syst.* 40: 59-78. Knudsen JT, Mogens Olesen J. 1993. Buzz-pollination and patterns in sexual traits in Ko KS, Jung HS. 2002. Three nonorthologous ITS1 types are present in a polypore fungus Kobayashi I *Entoloma clypeatum* on Rosa: taimerakud liiusuvad ja ka hüü Kobayashi I *Entoloma clypeatum* risomorfid ja klamüdosporid Koehler H, Warrelmann J, Frische T, Behrend P, Walter U. 2002. In-situ phytoreme Koele N, Dickie IA, Oleksyn J, Richardson SJ, Reich PB. 2012. No globally consis Koetschan C, Förster F, Keller A, Schleicher T, Ruderisch B, Schwarz R, Müller T, Kohn LM, Stasovski E. 1990. The mycorrhizal status of plants at Alexandra fiord, E Kohn LM, S *Neocudoniella* radicele kuusejuurtel. Liigikirjeldus ja EcM-n Kohn LM. 2005. Mechanisms of fungal speciation. *Annu. Rev. Phytopathol.* 43: 275-295. Kohout P, Šýkorová Z, Bahram M, Hadincová V, Albrechtová J, Tedersoo L, Vohni Kohzu A, Miyajima T, Tateishi T, Watanabe T, Takahashi M, Wada E. 2005. Dyna Kohzu A, Yoshioka T, Ando T, Takahashi M, Koba K, Wada E. 1999. Na 15N ja 13C Koide RT, Dickie IA. 2002. Effects of mycorrhizal fungi on plant populations. *Plant Koide RT, Dickie IA. 2002. Kit-based low-toxicity method for extracting and purify Koide RT, Fernandez CW, Peoples MS. 2011. Can ectomycorrhizal colonization of Koide RT, Kabir Z. 2001. Nutrient economy of red pine is affected by interactions b Koide RT, Sharda JN, Herr JR, Malcolm GM. 2008. Ectomycorrhizal fungi and the Koide RT, Shumway DL, Xu *Hüüfidena EcM* seened eriaegadel eri rohkusega, ent a Koide RT, Shumway DL. 2000. On variation of forest floor thickness across four red Koide RT, Suomi L, Stevens CM, McCormick L. 1998. Interactions between needle Koide RT, Wu T. 2003. Ectomycorrhizas and retarded decomposition in a Pinus resin Koide RT, Xu B, Sharda J, I *tammesavannis EMH: Cenoc, Clavulina, J10*, Russul Koide RT, Xu B, Sharda J. 2005. *65 a männi istand EMH: Cenococcum, Clavulina*, jori 1 Koizumi H, Oshima Y. 1985. Seasonal changes in photosynthesis of four understore Koizumi Y, Kelly JJ, Nakagawa T, Urakawa H, El-Fantroussi S, Al-Muzaini S, Fuki Kõljalg U, 1992. Mycorrhiza formed by basidiospores of *Tomentella crinalis* on *Pi Kõljalg U, 1996. Tomentella (Basidiomycota) and Related Genera in Temperate Eur Kõljalg U, I 1987 Kõljalg U, J *Tomentella* 3 sp Kõljalg U, Larsson K-H, Abarenkov K, Nilsson RH, Alexander IJ, Eberhardt U, Erik Kõljalg U, Renvall P. 2000. *Hydnellum gracilipes* – a link between stipitate and resu Kõljalg U, 13 (TOE) 2 König S, Wubet T, Dormann CF, Hempel S, Renker C, Buscot F. 2010. TaqMan Re Konno M, Iwamoto S, Seiwa K. 2011. Specialization of a fungal pathogen on host t Kope HH, V *Angianthus, Waitzia* (Asteraceae), Poranthera (Euphorbiaceae), Stylidii Koricheva J, Gange AC, Jones T. 2009. Effects of mycorrhizal fungi on insect herbi Korkama T, Fritze H, Pakkar EMH vs EcM: va aeglased: *Thelephora terr jt.*, Kottsee Korkama T, Pakkanen A, Pe *kuuseistandik eri Tylospora asterophora, The* terr, Pilt Korkama-Rajala T, Mueller MM, Pennanen T. 2008. Decomposition and fungi of nei Korotaevev AA. 2000. Biodiversity of mycorrhiza and health condition of sp *väheneb*. Koske RE, Gemma JN, Flynn T. 1992. Mycorrhizae in Hawaiian angiosperms: A s Koske RE, Sutton JC, Sheppard BR. 1975. Ecology of Endogone in lake Huron sanc Kosola KR, Durall DM, Rob *hüüridhaaval vs Hebeloma crustuliniforme*, Tuber spp Kost G. 2002. Contributions to tropical fungi I. Ecology and distribution of *Keenia e Kotiranta H, Larsson K-H, Saarenkokska R, Kulju M. 2011. Tretomyces gen. novum, Kottter MM, Farentinos RC. 1984. Formation of Ponderosa pine mycorrhizae after ir Kottke I, Beiter A, Weiss M, Haug I, Oberwinkler F, Nebel M. 2003. Heterobasidic Kottke I, Guttenberger M, Hampp R, Oberwinkler F. 1987. An in vitro method for e Kottke I, Haug I, Setaro S, S *Ecuadoris: Maksasamblad ja orhideed: Tulasnellales se Kottke I, Holopainen T, Alanen E, Turnau K. 1995. Deposition of nitrogen in vascul Kottke I, Oberwinkler F. 1988. Compararive studies of mycorrhization of Larix deci Kottke I, Pargney JC, Qian XM, Le Disquet I. 1995. Passage and deposition of solu Kottke I, Qian XM, Pritsch I *funktsionaalne erinevus erimikro-ja makroelementide k Kottke I, Suarez JP, Herrera P, Cruz D, Bauer R, Haug I, Garnica S. 2010. Atractiel Kottke I, Weber R, Ritter T, Oberwinkler F. 1995. Vitality of mycorrhizas and healt Kourtev PS, Ehrenfeld JG, Häggblom M. 2003. Experimental analysis of the effect c Kovacs GM, Balazs TK, Calonge FD, Martin MP. 2011. The diversity of Terfezia d Kovacs GM *Mattirolomyces terfezioides*: kolonis juuri, kus mood sõlmekesi, ümber Kovacs GM *Tuber spp: rufur Tuber spp -EcM*-dest tuleb palju viljakematele mittevaga Kovacs GM, Trappe JM, Alsheikh AM, Bóka K, Elliott TF. 2008. *Imaia*, a new tru Kovacs GM, Trappe JM, Alsheikh AM, Hansen K, Healy RA, Vagi P. 2011. *Terfez Kovacs GM Terfezia ja Helianthemum* suhe pole EcM, kuigi seda väidetakse. Terfe Kovacs GM *Helianthemirhiza* hirsuta: dolipooridega kandseen, imelik mantel*****

cd  
 cd  
 p/cd  
 p/cd  
 p  
 p  
 p  
 cd  
 p/cd  
 p  
 p  
 p  
 cd  
 cd  
 cd  
 p  
 p  
 2  
 p/cd  
 cd  
 cd  
 p  
 p/cd  
 p  
 p/cd  
 cd  
 j  
 p/cd  
 p  
 cd

x

x

x

Kowalchuk GA, Gerards S, Woldendorp JW. 1997. Detection and characterization of  
 Kowalchuk GA, Os GJ. Aar **DGGE bändid: bakterid ja seened -liigirikkus suurem k**  
 Kraft NJB, Comita LS, Chase JM, Sanders NJ, Swenson NG, Crist TO and 10 other  
 Kraft NJB, Cornwell WK, Webb CO, Ackerly DD. 2007. Trait evolution, community  
 Kraft NJB, Valencia R, Ackerly DD. 2008. Functional traits and niche-based tree c  
 Krahulec F, Rosen E, van der Maarel E. 1986. Preliminary classification and ecology  
 Kraigher H, **Lactarius lignyotus-L. Picinus** sektsioon on EcM morfi poolest eristamat  
 Kraigher H, Batic F, Agerer **kuusikus: saastati reostus: Paxillus, Piceir inflata, Xero**  
 Kramar U. 1901. Studie über die mykorrhiza von *Pirola rotundifolia* L. Bull. Int. Acad  
 Kranabetter JM, Durall DM, **metsa laial pro** Cortinariid spp  
 Kranabetter **viited morfotüüp** taimlast taimlasse taimlas: **Thelephora, MRA**  
 Kranabetter **xxx** **Ku vs Mä vs Nulg**; RM vs Non-RM-seened  
 Kranabetter JM, MacKenzie WH. 2010. Contrasts among mycorrhizal plant guilds in  
 Kranabetter JM, Stoehr MU, **Pseudotsuga ökotüüpide mõju EcM seente liigi**  
 Kranabetter JM, Wylie T. 19 **raiesmiku gradier Kokku: Cenoc, Lactarius, Hebeloma:**  
 Kranabetter x **vs raiesmik; vs se Lageraie seemnepuudega: Cenoc, Le**  
 Kranabetter x **ECM: metsas (suurem liigirikku ja BD) ja lageraielang**  
 Kranabetter JM. 2005. Unde **tsuuga ja kuuse n kuusel Amphinema, Laccaria laccata**  
 Krasnov BR, Fortuna MA, Mouillot D, Khokhlova IS, Shenbrot GI, Poulin R. 2012.  
 Krasnov BR, Mouillot D, Shenbrot GI, Khokhlova IS, Vinarski MV, Korralo-Vinars  
 Krasnov BR, Poulin R, Mouillot D. 2011. Scale-dependence of phylogenetic signal in  
 Krasowski MJ, Owens JN, Tackaberry LE, Massicotte HB. 1999. Above- and below  
 Krause C, Garnica S, Bauer R, Nebel M. 2011. Aneuraceae (Metzgeriales) and tulas  
 Kreft H, Jetz W. 2007. Global patterns and determinants of vascular plant diversity.  
 Kreisler H. 1970. El papel de los hongos en la vegetación forestal de Cuba. Bol. Soc.  
 Kretzer AM, Bidartondo MI. Sarcodes sanguin **Rhizopogon ellenae ainult**  
 Kretzer AM, Bruns TD. 1999. Use of atp6 in fungal phylogenetics: an example from  
 Kretzer AM, Dunham S, Molina R, Spatafora JW. 2004. Microsatellite markers reve  
 Kretzer AM, Li Y, Szaro T, Bruns TD. 1996. Internal transcribed spacer sequences  
 Kretzer AM, Luoma DL, Molina R, Spatafora FW. 2003. Taxonomy of the Rhizopo  
 Kristiansen KA, Freudenstein JV, Rasmussen FN, Rasmussen HN. 2004. Molecular  
 Kristiansen KA, Taylor DL, **Dactylorhiza majalis: Laccaria like, Tulasnella sp.**  
 Kroes, I, Lepp PW, Relman **hambasodist leiti väga palju eribaktereid 16S rDNA se**  
 Kron KA, Judd WS, Stevens PF, Crayn DM, Anderberg AA, Gadek PA, Quinn CJ,  
 Kropf S, Heuer H, Grüning M, Smalla K. 2004. Significance test for comparing com  
 Kropp BR, Albee-Scott S, Castellano MA, Trappe JM. 2012. *Cryptolepiota*, a new s  
 Kropp BR, Albee-Scott S. 2010. *Inocybe tauensis*, a new species from the Samoan a  
 Kropp BR, Albee-Scott S, Castellano MA, Trappe JM. 2012. *Cryptolepiota*, a new  
 Kropp BR, Fortin JA. 1988. The incompatibility system and relative ectomycorrhiza  
 Kropp BR, Hutchison LJ. 1996. *Gigasperma americanum*, a new hypogeous memb  
 Kropp BR, Trappe JM. 1982. Ectomycorrhizal fungi of *Tsuga heterophylla*. Mycol  
 Kropp BR. 1982. Fungi from decayed wood as ectomycorrhizal symbionts **ECM CV**  
 Krpata D, Mühlmann O, Kul **Arctostaphylos u Cortinariid (12), Tomentella (8)**, huv  
 Krpata D, Peintner U, Langer I, Fitz WJ, Schweiger P. 2008. Ectomycorrhizal comm  
 Krsek M, Wellington EMH. 1999. Comparison of different methods for the isolation  
 Krüger A et al. 2004. Identification of premycorrhiza-related plant genes in the asso  
 Krüger M, Krüger C, Walker C, Stockinger H, Schüssler A. 2012. Phylogenetic refe  
 Krüger M, Stockinger H, Krüger C, Schüssler A. 2009. DNA-based species level de  
 Krupa S, Fries N. 1971. Studies on ectomycorrhizae of pine: Production of organic v  
 Kuan I-C, Tien M. 1993. Stimulation of Mn peroxidase activity: A possible role for  
 Kuczynski J, Liu Z, Lozupone C, McDonald D, Fierer N, Knight R. 2010. Microbia  
 Kueffer C, Schumacher E, Fleischmann, Edwards PJ, Dietz H. 2007. Strong below-  
 Kueck C, Tommerup IC, Malajczuk N. 1992. Hydrogel bead inocula for the producti  
 Kühndorf K, **Leotia lubrica arbutoidne mükoriisa Comarostaphyloset**  
 Kühn I, Nobis MP, Durka W. 2009. Combining spatial and phylogenetic eigenvecto  
 Kuikka K, Härmä E, Markkola A, Rautio P, Roitto M, Saikkonen K, Ahonen-Jonna  
 Kulikov PV, Filippov EG. 2001. Specific features of mycorrhizal symbiosis formati  
 Kull K, Zobel M. 1991. High species richness in an Estonian wooded meadow. J. V  
 Kull T, Kukk T, Leht M, Krall H, Kukk Ü, Kull K, Kuusk V. 2002. Distribution tre  
 Kummel M, Lostroh P. 2011 **valgusallika tugevus mõjutab kahe seeneliigi pi**  
 Kuminaga S, Natsuaki T, Takeuchi T, Yokosawa R. 1997. Sequence variation of the  
 Kuminaga S, Nicoletti R, Lahoz E, Naito S. 2000. Ascription of Nt isolates of Rhizo  
 Küper W, Sommer JH, Lovett JC, Mutke J, Linder HP, Beentje HJ, van Rompaey R  
 Kuske CR, Ticknor LO, Busch JD, Gehring CA, Whitham TG. 2003. The pinyon rh  
 Kuyper TW, Veschoor BC. 1995. Enhancement of nitrification rates in vitro by inter  
 Kuyper TW. 2008. Rhizosphere studies from the nanoscale to the globe. New Phyto  
 Kwak TJ, Zedler JB. 1997. Food web analysis of southern California coastal wetlan  
 Kwasna H. 2004. Natural sh **risosfääri seened** tammel vs 2 a peale langetamist. Oidi

cd  
p  
p/cd  
p/cd  
p/cd  
p/cd  
p  
p  
p  
p/cd  
p/cd  
p  
p  
p  
p/cd  
cd  
cd  
cd  
p  
p/cd  
cd  
p/cd  
p  
p  
p  
p/cd  
p/cd  
p/cd  
cd  
e  
e  
cd  
p  
t  
t  
p

x

Kytöviita M-M. 2000. Do symbiotic fungi refresh themselves by incorporating their  
Laaka -Lindberg S. 1999. Asexual reproduction in a population of a leafy hepatic sp  
Laakovirta K, Lodenius M. 1979. Mercury content of fungi in Helsinki. Ann. Bot. F  
Lacourt I, Duplessis S, Abba S, Bonfante P, Martin F. 2002. Isolation and characteri  
Ladai J, Sharpton TJ, Finucane MM, Jospin G, Kembel SW, O'Dwyer J, Koepfel A  
Ladiges PY, Kellermann J, Nelson G, Humphries CJ, Udovicic F. 2005. Historical b  
Ladiges PY, Udovicic F, Nelson G. 2003. Australian biogeographical connections a  
Ladiges PY, Udovicic F. 2005. Comment on molecular dating of the age of eucalypt  
Læssøe T, Hansen K. 2007. Truffle trouble: what happened to the Tuberales. Mycol  
Læssøe T, Petersen JH. 2008. Svampe livet på ækvator. Svampe 58: 1-52.  
Laiho O, Mikola P. 1964. Studies on the effect of some eradicators on mycorrhizal de  
Laiho O. 1965. Further studies on the ectendotrophic mycorrhiza. Ann. For. Fenn. 7  
Laiho O. 1970. *Paxillus involutus* as a mycorrhizal symbiont of forest trees. Acta F  
Laliberte E, Zemunik G, Turner BL. 2014. Environmental filtering explains variation  
Lam TY, Maguire DA. 2012. Structural Equation Modeling: theory and applications  
Lamarche J, Stefani FOP, Seguin A, Hamelin RC. 2011. Impact of endochitinase-tra  
Lamarche J, Stefani FOP, Se mullaseened vs endokitinaas-transform Picea ri  
Lamb Frye AS, Kron KA. 2003. rbcL phylogeny and character evolution in Polygon  
Lamb RJ, Richards BN. 1974. Inoculation of pines with mycorrhizal fungi in natural  
Lamb RJ, Richards BN. 1974. Inoculation of pines with mycorrhizal fungi in natural  
Lamb RJ, Richards BN. 1974. Survival potential of sexual and asexual spores of ect  
Lambers H, Raven JA, Shaver GA, Smith SE. 2008. Plant nutrient-acquisition strate  
Lamhamedi MS, Bernier PY, Fortin JA. 1992. Growth, nutrition and response to wa  
Lamhamedi MS, Bernier PY, Fortin JA. 1992. Hydraulic conductance and soil water  
Lamhamedi MS, Fortin JA, Kope HH, Kropp BR. 1990. Genetic variation in ectomy  
Lamhamedi MS, Fortin JA. 1991. Genetic variations of ectomycorrhizal fungi: extra  
Lamhamedi MS, Godbout C, Fortin JA. 1994. Dependence of *Laccaria bicolor* basic  
Lamont BB, Lange BJ. 1976. 'Stalagmitiform' roots in limestone caves. New Phytol. 7  
Lamont BB, Ralph CS, Christensen PES. 1985. Mycophagous marsupials as dispers  
Lancellotti E, Franceschini A Sardiinia Quen Domin Cenoc; tom 12, rula 8, in  
Landeweert R, Hoffland E, Finlay RD, Kuyper TW, van Breemen N. 2001. Linking  
Landeweert R, Leeflang P, K männikus EMH s O: *Cortinarius acutus*, *Russula decol*  
Landeweert R, Leeflang P, S ektomiükoriisa vs mulla DNA: liiga vähe proove, sarnai  
Landeweert R, Veenman C, Kuyper TW, Fritze H, Wernars K, Smit E. 2003. Quant  
Landhäuser SM, Stadt KJ, Lieffers VJ. 1997. Photosynthetic strategies of summerg  
Landim MF. 2003. Brazilian Atlantic rain forest remnants and mycorrhizal symbiosi  
Landvik S, Egger KN, Schumacher T. 1997. Towards a subordinal classification of t  
Lane D. 1991. 16S/23S rRNA sequencing, p. 115-175. In E. Stackebrandt and M. C  
Lanfranco L, Arlorio M, Matteucci A, Bonfante P. 1995. Truffles: their life cycle an  
Lanfranco L, Garnero L, Delpero M, Bonfante P. 1995. Chitin synthase homologs in  
Lang C, Polle A. 2011. Ectoi Saksa *Fagus-Tilia-Fraxinus*: ei sõltu puude liigi  
Lang C, Seven J, Polle A. 20 GER lehtmetsas *Tilia* vs *Fagus* Vs *Carpinus*: er  
Langeley JA, Hungate BA. Mycorrhizal controls on belowground litter quality. Ecol  
Langenfeld-Heyser R, Gao J, Ducic T, Tachd P, Lu CF, Fritz E, Gafur A, Polle A. 2  
Langenheder S, Bulling MT, Solan M, Prosser JI. 2010. Bacterial biodiversity-ecosy  
Langer I, Krpata D, Peintner U, Wenzel WW, Schweiger P. 2008. Media formatio  
Langley JA, Chapman SK, Hungate BA. 2006. Ectomycorrhizal colonization slows i  
Langley JA, Dijkstra P, Drak medit tammevõsa *Cenococcum*  
Langrell SRH, Lung-Escarmant B, Decroocq S. 2001. Isolation and characterization  
Lapeyrie F, Chilvers GA, Bhem CA. 1987. Oxalate acid synthesis by the mycorrhizal  
Lapeyrie F. 1988. Oxalate synthesis from soil bicarbonate by the mycorrhizal fungus  
Lapeyrie FF, Bruchet G. 1985. Some factors influencing viability of ectomycorrhizal  
Lapeyrie FF, Bruchet G. 1986. Calcium accumulation by two strains, calcicole and c  
Lapeyrie FF, Chilvers GA. 1985. An endomycorrhiza-ectomycorrhiza succession as:  
Lara E, Belbahri L. 2011. SSU rDNA reveals major trends in oomycete evolution. F  
Lara E, Mitchell EAD, More turbaraba eukarüoodid: domin seened, eriti see  
Lara E, Moreira D, Lopez-Garcia P. 2010. The environmental clade LKM11 and *Ro*  
Largent DL, Sugihara N, Wishner C. 1980. Occurrence of mycorrhizae on ericaceou  
Larget B, Simon DL. 1999. Markov chain Monte Carlo algorithms for the Bayesian  
Larsen MJ, Smith JE, McKay D. 1997. On *Piloderma bicolor* and the close *Piloderm*  
Larsson E. 2002. Phylogeny of Corticioid Fungi with Russuloid Characteristics. PhD  
Larsson E, Larsson K-H. 2003. Phylogenetic relationships of russuloid basidiomycet  
Larsson E, Larsson K-H. Taxonomy of *Gloeocystidiellum* sensu stricto. Unpublishe  
Larsson E, Sundberg H. 2011. *Lyophyllum shimeji*, a species associated with lichen  
Larsson K-H, Parmasto E, Fischer M, Langer E, Nakasone KK, Redhead SA. 2006.  
Larsson K-H. 2007. Re-thinking the classification of corticioid fungi. Mycol. Res. 1  
Last FT, Dighton J, Mason PA. 1987. Successions of sheathing mycorrhiz: *peremees*  
Latalova K, Balaz M. 2010. Carbon nutrition of mature green orchid *Serapias stictif*

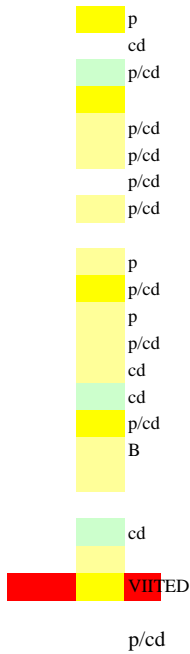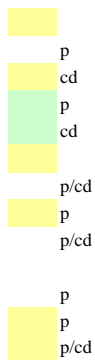

x  
y

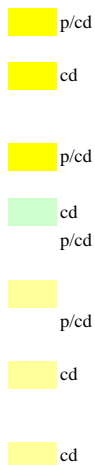

Latham RE, Ricklefs RE. 1993. Continental comparisons of temperate-zone tree spe  
Latta RG. 2003. Gene flow, adaptive population divergence and comparative popula  
Launonen TM, Ashton DH, I vs eri vanustel pölenud muldadel bioassay: punaseks p  
Lavelle P, Lattaud C, Trigo D, Barois I. 1995. Mutualism and biodiversity in soils. F  
Lavin M, Herendeen PS, Wojciechowski MF. 2005. Evolutionary rates analysis of L  
Lavin M, Schrire BP, Lewis G, Pennington RT, Delgado-Salinas A, Thulin M, Hugh  
Lavin M. 2005. Floristic and geographical stability of discontinuous seasonally dry f  
Lawrey JD, Binder M, Diederich P, Molina MC, Sikaroodi M, Ertz D. 2007. Phylog  
Lawrynowicz M. 1990. Chorology of the European Hypogeous Ascomycetes. II. Tu  
Lawrynowicz M. 2003. Threats to hypogeous fungi. In: ???  
Lawton RM. 1964. The ecology of the Marquesia acuminata evergreen forests and tl  
Lawton RM. 1978. A study of the dynamic ecology of Zambian vegetation. J. Ecol.  
Le Calvez T, Burgaud G, M: ookeanisügavustes: v vähe, sh Chytridiomycota  
Le Quere A, Schützendübel A, Rajashekar B, Canback B, Hedh J, Erland S, Johans  
Le Quere A, Johansson T, Tunlid A. 2002. Size and complexity of the nuclear geno  
Leake J, Johnson D, Donnelly D, Muckle G, Boddy L, Read DJ. 2004. Networks of  
Leake JR, Donnelly DP, Boddy L. 2002. In: van der Heijden MGA, Sanders IR (eds  
Leake JR, Donnelly DP, Saunders EM, Boddy L, Read DJ. 2001. Rates and quantiti  
Leake JR, Duran AL, Hardy KE, Johnson I, Beerling DJ, Banwart SA, Smits MM. 2  
Leake JR, McKendrick SL, Bidartondo MI, Read DJ. 2004. Symbiotic germination :  
Leake JR, Read DJ. 1990. Chitin as a nitrogen source for mycorrhizal fungi. Mycol.  
Leake JR. 1994. The biology of myco-heterotrophic ("saprophytic") plants. New Ph  
Leake JR. 2004. Myco-heterotroph/epiparasitic plant interactions with ectomycorrh  
Lebel T, Castellano M. 2002. Type studies of sequestrate Russulales II. Australian a  
Lebel T, Catchside PS. 2009. The truffle genus *Cribbea* (Physalacriaceae, Agarica  
Lebel T, Orihara T, Maekawa N. 2012. The sequestrate genus *Rosbeeva* T. Lebel &  
Lebel T, Tonkin JE. 2007. Australasian species of *Macowanites* are sequestrate spe  
LeDuc SD, Lilleskov EA, H: Michigan Pinu noormates metsades Thel terr ja  
Lee C, Lee S, Shin SG, Hwang S. 2003. Real-time PCR determination of rRNA gen  
Lee J, Lee S, Young PW. 2008. Improved PCR primers for the detection and identif  
Lee KJ, Lee H. 2004. Fungal diversity and fruit-body production in relation *Quercus*.  
Lee MR, Parsons I. 1999. Biomechanical and biochemical weathering of lichen-encr  
Lee SB, Taylor JW. 1990. Isolation of DNA from fungal mycelia and single spores.  
Lee SL Ale; *Shorea leprosula* Russula, Tomentella, Riessia, Riessiella jt *Shorea le*  
Lee S-L, Ng KK-S, Saw L-G, Norwati A, Salwana MHS, Lee C-T, Norwati M. 200  
Lee SS, Alexander IJ. 1994. The response of seedlings of two dipterocarp species to  
Lee SS, Alexander IJ. 1996. *Shorea leprosula*: *Fagirhiza fusca*, *Riessiella* sp, Russul  
Lee SS, Patahayah M, Chong WS, Lapeyrie F. 2008. Successful ectomycorrhizal inc  
Lee SS, Thi BK, Patahayah M. 2010. An ectomycorrhizal telephoroid fungus of Mi  
Lee SS, Watling R, Turnbull E. 1995. Ectomycorrhizal fungi as possible bi varase st  
Lee SS, Watling R, Turnbull E. 2003. Diversity of putative ectomycorrhizi Malaysia  
Lee SS. 1998. Root symbiosis and nutrition. In: Appanah S, Turnbull J, eds. A Revi  
Legendre P, Fortin M-J. 2010. Comparison of the Mantel test and alternative approa  
Legendre P, Gallagher ED. 2001. Ecologically meaningful transformations for ordi  
Legendre P, Mi X, Ren H, Ma K, Yu M, Sun F, He F. 2009. Partitioning beta divers  
Legendre P. 2008. Studying beta diversity: ecological variation partitioning by multij  
Legrand P, Ghahari S, Guillaumin J-J. 1996. Occurrence of genets of *Armi* *Armillari*  
Lehto T. 1992. Effect of drought on *Picea sitchensis* seedlings inoculated with myco  
Leibold MA, Economo EP, Peres-Neto P. 2010. Metacommunity phylogenetics: sep  
Lekberg Y, Koide RT, Rohr JR, Aldrich-Wolfe L, Morton JB. 2007. Role of niche r  
Lekberg Y, Schnoor T, Kjoller R, Gibbons SM, Hansen LH, Al-Soud WA, Sorensen  
Lemmon AR, Milinkovitch MC. 2002. The metapopulation genetic algorithm: an eff  
Leonardi M, Paolucci F, Rubini A, Simonini G, Pacioni G. 2005. Assessment of inte  
LePage BA, Currah RS, Stockey RA, Rothwell GW. 1997. Fossil ectomycorrhizae f  
LePage BA. 2003. The evolution, biogeography and palaeoecology of the Pinaceae l  
Lepp H. 2009 Australian Fungi Website. <http://www.anbg.gov.au/fungi/>  
Lerat S, Lapointe L, Gutjahr S, Piché Y, Vierheilig H. 2003. Carbon partitioning in :  
Lesaulnier C, Papamichail D, McCorkle S, Olliver B, Skiena S, Taghavi S, Zak D, I  
Leski T, Aucina A, Skridaila *Pinus sylvestris* 5 klooni eri taimlates: BD sarn  
Leski T, Pietras M, Rudawska *Quercus* spp P *Pezizales* mitmed liigid, Scleroc  
Leski T, Rudawska M, Aucin *Larix* bare-root *Wilcoxina mikolae*, *Suillus grev*  
Leski T, Rudawska M. 2012 *POL. Larix* see Ala 1: *Hydnotrya*; Ala2 ja nurse  
Letowski J, Brousseau R, Masson L. 2004. Designing better probes: effect of probe  
Leuschner C, Jungkunst HF, Fleck S. 2009. Functional role of forest diversity: pros :  
Levesque CA. 2011. Fifty years of oomycetes - from consolidation to evolutionary a  
Levin DA. 2003. The ecological transition in speciation. *New Phytol.* 161: 91–96.  
Levisohn I. 1953. Aberrant root imfections of pine and spruce seedlings. *QQQ* 284-  
Levisohn I. 1958. Physiological and ecological factors influencing the effects of myco



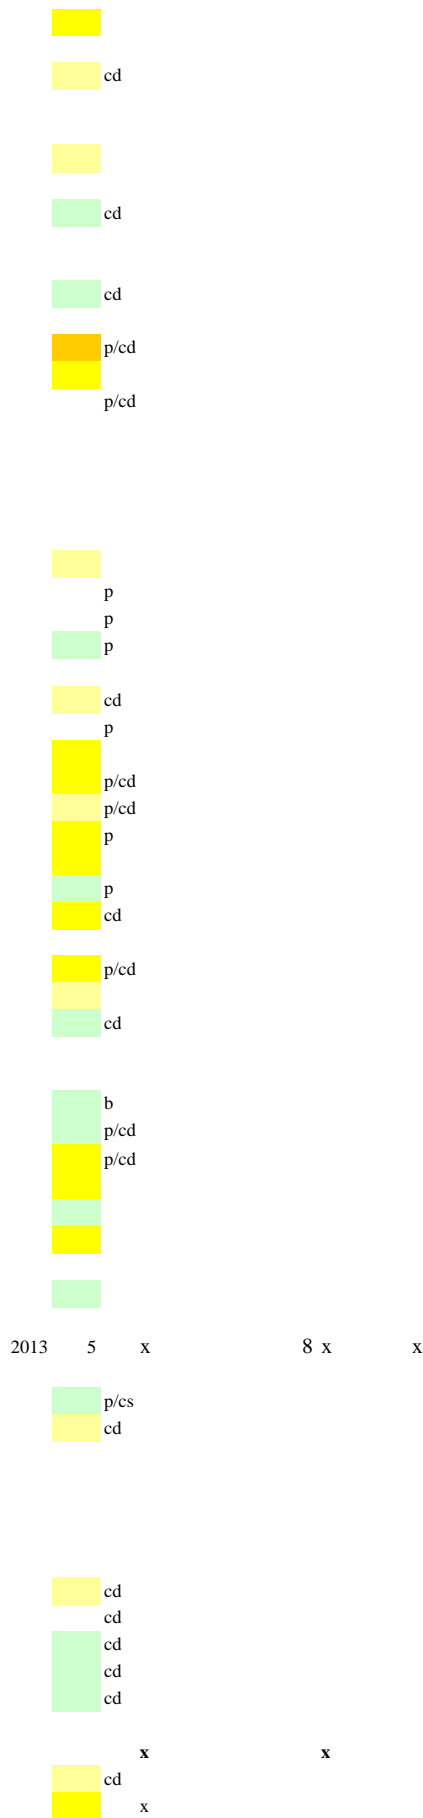

Levy-Booth DJ, Campbell RG, Gulden RH, Hart MM, Powell JR, Klironomos JN, F Lewisohn D, Nevo E, Wasser SP, Hadar Y, Beharav A. 2001. Genetic diversity in Lewis PO. 2001. Phylogenetic systematics turns over a new leaf. Trends Ecol. Evol. Li AR, Guan KY. 2008. Arbuscular mycorrhizal fungi may serve as another nutrient Li A-R, Guan K-Y. 2008. Arbuscular mycorrhizal fungi may serve as another nutrient Li CY, Massicotte HB, Moore LVH. 1992. Nitrogen-fixing Bacillus associated with Li D-W. 2005. Release and dispersal of basidiospores from Amanita muscaria var. *A. Li L, Yang A, Zhao Z. 2005. Seasonality of arbuscular mycorrhizal symbiosis and Li R-Q, Chen Z-D, Lu A-M, Soltis DE, Soltis PS, Manos PS. 2004. Phylogenetic re Li YC, Feng B, Yang ZL. 2011. *Zangia*, a new genus of Boletaceae supported by nr Lian C, Miwa M, Hogetsu T. 2001. Outcrossing and paternity analysis of Pinus dens Lian C, Nara K, Nakaya H, Zhou Z, Wu B, Miyashita N, Hogetsu T. 2001. Develop Lian C, Naramatsu M, Nara I. *Tricholoma matsi* Ringi sees *Rhizopogon* sp., Russ sp. Lian C, Zhou Z, Hogetsu T. 2001. A simple method for developing microsatellite ma Liang Y, Guo L-D, Du X-J, Ma K-P. 2007. Spatial structure and diversity *EcM puu* Lichstein JW. 2007. Multiple regression on distance matrices: a multivariate spatial ar Liebel HT, Bidartondo MI, Preiss K, Segreto R, Stöckel M, Rodda M, Gebauer G. 2 Liebel HT, Gebauer G. 2010. Stable isotope signatures confirm carbon and nitrogen Liepina L. 2012. Occurrence of fungal structures in bryophytes of the boreo-nemoral Lievens B, Kerckhove S, Juste A, Cammue BOA, Honnay O, Jacquemyn H. 2010. F Ligrone R. *Aneuria* ja *Cryptothallus* kandseentest endofüütid: koloniseerivad vaid j Lihnell D. 1940. Untersuchu: *kadakal arbuskulaarne MR ja DSE, kahest kohast leiti* Lihnell D. 1943. *Cenococcum: mantel* Lihnell D. 1943. Keimungsversuche mit Pyrolasamen. Symbolae Botanicae Upsalier Liira J, Zobel K. 2000. The species richness -biomass relationship in herbaceous pla Liiri M, Setälä, Haimi J, Pen *mikrolüljalgsete* BD nullas ei mõjuta seente BD DGG Lilja A, Rikala R. 2000. Effect of uninucleate Rhizoctonia on the survival of outplan Lilleskov EA, Bruns TD, Dawson TE, Camacho FJ. 2009. Water sources and contrc Lilleskov EA, Bruns TD, Horton TR, Taylor DL, Grogan P. 2004. Detection of fore: Lilleskov EA, Bruns TD. 2003. Root colonization dynamics of two ectomycorrhizal Lilleskov EA, Bruns TD. 2005. Spore dispersal of aresupinate ectomycorrhizal fung Lilleskov EA, xxx kuusik: N-gradier kõrge N: *Lact theiogalus*, F kuusik: N Lilleskov EA, Fahey TJ, Lovett GM. 2001. Ectomycorrhizal fungal above: *kahaneb* Lilleskov EA, Hobbie EA, Fahey TJ. 2002. Ectomycorrhizal fungal taxa differing in Lilleskov EA, Hobbie EA, Horton TR. 2011. Conservation of ectomycorrhizal fungi Lilleskov EA, Parrent JL. 2007. Can we develop general predictive models of myco Lilleskov EA; Bruns TD. 2003. Root colonization dynamics of two ectomycorrhizal Lim S, Notley-McRobba L, Lim M, Carter DA. 2004. A comparison of the nature at Lim SR, Berbee ML. 2013. I Vancouver IS, *fülogeneetiline struktuur* LSU p Lindahl B, Finlay R, Olsson S. 2001. Simultaneous, bidirectional translocation of 32 Lindahl B, Finlay RD, Cairney JWG. 2005. Enzymatic activities of mycelia in myco Lindahl B, Finlay RD. 2006. Activities of chitinolytic enzymes during primary and s Lindahl B, Ihrmark K, Bober *metsamulla erikih värskes kõdus Helotiales*, *Mycena-M Lindahl B, Stenlid J, Finlay R. 2001. Effects of resource availability on mycelial inte Lindahl B, Stenlid J, Olsson S, Finlay R. 1999. Translocation of 32P between intera Lindahl B, Taylor AFS, Finlay RD. 2002. Defining nutritional constraints on carbon Lindahl B, Tunlid A. 2015. Ectomycorrhizal fungi – potential organic matter decom Lindahl B. 2000. Ectomycorrhizal fungi raid saprotrophic ones. *Mycol. Res.* 104: 38 Lindahl BD, de Boer W, Fini *nullaseened; vs girdling, SWE: EcM seened* as Lindahl BD, Nilsson RH, Tedersoo L, Abarenkov K, Carlsen T, Kjoller R, Kõljalg U Lindahl BD, Taylor AFS. 2004. Occurrence of N-acetylhexosaminidase-encoding ge Linder HP, Hardy CR. 2004. Evolution of the species-rich Cape flora. *Phil. Trans. R Linder HP. 2001. Plant diversity and endemism in sub-Saharan tropical Africa. J. Bi Linder RC, Goertzen LR, Vanden Heuvel B, Francisco-Ortega J, Jansen RK. 2000. Lindner DL, Banik MT. 2009. Effects of cloning and root-tip size on observations of Lindner DL, Banik MT. 2011. Intragenomic variation in the ITS rDNA region obscu Lindner M, Maroschek M, Netherer S, Kremer A, Barbati A, Garcia-Gonzalo J, Sei Lindquist VB. 1939. Die Fichtenmykorrhiza im Lichte der modernen Wuchsstoffors Lindsley MD, Hurst SF, Iqbal NJ, Morrison CJ. 2001. Rapid identification of dimor Lindstrom SC. 2001. The Bering Strait connection: dispersal and speciation in borea Lipshutz RJ, Fodor SPA, Gingeras TR, Lockhart DJ. 1999. High density synthetic o Lipson DA, Schadt CW, Schmidt SK, Monson RK. 1999. Ectomycorrhizal transfer o Lipson DA, Schadt CW, Sch *mikroobikoosluste* struktuur on erinev ühel talvel, keva Lipus A, Kennedy PG. 2011. Frankia assemblages associated with *Alnus rubra* and Lisboa FJG, Peres-Neto PR, Chaer GM, Jesus EdC, Mitchell RJ, et al. 2014. Much Liston A, Robinson WA, Pinero D, Alvarez-Buylla ER. 1999. Phylogenetics of Pinu Litaker RW, Vandersea MW, Kibler SR, Reece KS, Stokes NA, Lutzonia FM, Yom Litchman E. 2010. Invisible invaders: non-pathogenic invasive microbes in aquatic a***

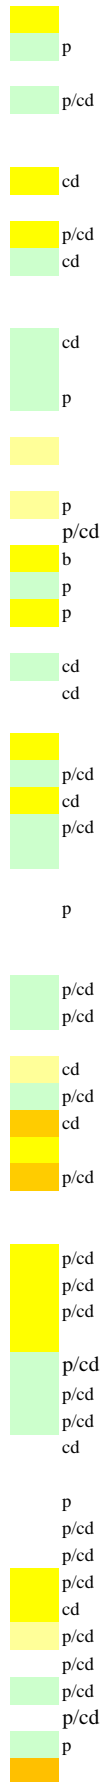

Litchman E. 2010. Invisible invaders: non-pathogenic invasive microbes in aquatic a  
 Liti G, Carter DM, Moses AM, Warringer J, Parts L, James SA and 20 others. 2010  
 Litton CM, Raich JW, Ryan MG. 2007. Carbon allocation in forest ecosystems. *Glo*  
 Liu G, Chambers SM, Cairney JWG. 1998. Molecular diversity of ericoid mycorrhiz  
 Liu H, Luo Y, Liu H. 2010. Studies of mycorrhizal fungi of Chinese orchids and thei  
 Liu JJ, Hall BD. 2004. Body plan evolution of ascomycetes, as inferred from an RN.  
 Liu K, Raghavan S, Nelesen S, Linder CR, Warnow T. 2009. Rapid and accurate lar  
 Liu K-L, Porras-Alfaro A, Kuske CR, Eichorst SA, Xie G. 2012. Accurate, rapid tax  
 Liu W-T, Mirzabekov AD, Stahl DA. 2001. Optimization of an oligonucleotide micr  
 Liu X, Liang M, Etienne RS, Wang Y, Staehelin C, Yu S. 2012. Experimental evide  
 Liu Y, Leigh JW, Brinkmann H, Cushion M, Rodriguez-Espeleta N, Philippe H, Lar  
 Liu YJ, Whelen S, Hall BD. 1999. Phylogenetic relationships among ascomycetes: e  
 Lobanov NB. 1971. Mikotrofnost drevesnyh rastenii. Izdatelstvo Lesnaja Promyshl  
 LoBuglio KF, 1999. *Cenococcum*. In: Cairney JWG, Chambers SM (eds). *Ectomyc*  
 LoBuglio KF, Berbee ML, Taylor JW. 1996. Phylogenetic origins of the asexual my  
 LoBuglio KF, Taylor JW. 2002. Recombination and genetic differentiation in the my  
 LoBuglio KF, Wilcox HE. 1988. Growth and survival of ectomycorrhizal and ectenc  
 Lockwood JL, Hoopes MF, Marchetti MP. 2007. *Invasion Ecology*. Blackwell Publ  
 Lodge DJ, 6 mantlitüüpi  
 Lodge DJ. 1989. The influence of soil moisture and flooding on formation of VA-en  
 Lodge DJ. 1996. Microorganisms. In: Reagan DP, Waide RB, eds. *The fo* **Puerto R**  
 Lodge DJ. 2003. Basidiomycetes of the Greater Antilles, especially the Luquillo LTI  
 Lomolino MV, Riddle BR, Brown JH. 2006. *Biogeography*. 3rd Edn. Sinauer Assoc  
 Londono AC, Alvarez E, Forero E, Morton CM. 1995. A new genus and species of  
 Longino JT, Coddington J, C liigirikikuse ekstrapoleerimine lihtsate matemaatiliste fu  
 Lopez-Quintero CA, Straatsma G, Franco-Molano AE, Boekhout T. 2012. COL At  
 Lorang JM, Tuori RP, Martinez JP, Sawyer TL, Redman RS, Rollins JA, Wolpert T  
 Lord NS, Kaplan CW, Shank P, Kitts CL, Elrod SL. 2002. Assessment of fungal div  
 Loreau M, Hector A. 2001. Partitioning selection and complementarity in biodiversit  
 Loreau M, Hector A. 2001. Partitioning selection and complementarity in biodiversit  
 Loreau M, Naeem S, Inchausti P et al., Biodiversity and ecosystem functioning: curr  
 Loreau M. 2000. Biodiversit liigirikikus-ökosüs prod, stab suhe: nishi efekt, selectio  
 Lorie MAJ, Lumme I, Niemi M, Tormala T. 1989. Inoculation of willows (*Salix* sp;  
 Losos JB. 1996. Phylogenetic perspectives on community ecology. *Ecology* 77: 134  
 Losos JB. 2008. Phylogenetic niche conservatism, phylogenetic signal and the relatio  
 Louis I. 198 *Shorea parvifolia* ECM ja ektendoMR on mõl sagedased EEMR on kau  
 Louis I. 1990. A mycorrhizal survey of plant species colonizing coastal reclaimed la  
 Louzan R, Wilson AW, Binder M, Hibbett DS. 2007. Phylogenetic placement of *Dij*  
 Lovelock CE, Ewel JJ. 2005. *Links between tree species, symbiotic fungal diversity*  
 Lovett JC, Marshall AR, Carr J. 2006. Changes in tropical forest egetation along an  
 Lovett JC. 1996. Elevational and latitudinal changes in tree associations and diversit  
 Lowell JL, Klein DA. 2001. **18S diversiteet S.**  
 Lowore J. 2003. Miombo woodlands and rural livelihoods in Malawi. CIFOR report  
 Loy A, Lehner A, Lee N, Adamczyk J, Meier H, Ernst J, Schleifer K-H, Wagner M.  
 Löytynoja A, Goldman N. 2008. Phylogeny-aware gap placement prevents errors in  
 Lozupone C, Knight R. 2005. UniFrac: a new phylogenetic method for comparing m  
 Lozupone C, Lladser ME, Knights D, Stombaugh J, Knight R. 2011. Unifrac: an effi  
 Lozupone CA, Hamady M, Cantarel BL, Coutinho PM, Henrissat B, Gordon JI, Kni  
 Lozupone CA, Hamady M, Kelley, ST, Knight R. 2007. Quantitative and qualitative  
 Lozupone CA, Hamady M, Knight R. 2006. UniFrac-An online tool for comparing n  
 Lozupone CA, Knight R. 2007. Global patterns in bacterial divesity. *Proc. Natl. Aca*  
 Lozupone CA, Knight R. 2008. Species divergence and the measurement of microbi  
 Lu G, Cannon PF, Reid A, Simmons CM. 2004. Diversity and molecular relationship  
 Lu X, Malajczuk N, Brundrett M, Dell B. 1999. Fruiting of putative ectom **Eucalypt**  
 Lu X, Malajczuk N, Dell B. 1998. Mycorrhiza formtion and growth of *Eucalyptus g*  
 Lucas EJ, S.R.Belsham2, E.M. NicLughadha1, D. A.Orlovich2, C.M. Sakuragui3,M  
 Lucas RW, Casper BB. 2008. Ectomycorrhizal community and extracellular enzyme  
 Lück R. 1941. Zur Keimung der heimischen Pirola-Arten. *Flora (Jena)* 135: 1-5.  
 Ludley KE, Robinson CH, Jickells S, Chamberlain PM, Whitaker J. 2008. Different  
 Ludley KE, Robinson CH. 2008. 'Decomposer' Basidiomycota in Arctic and Antarc  
 Luis P, Kellner H, Zimdars E lakaasigeenide m geenidest nii ülal kui all domin Russu  
 Luis P, Walther G, Kellner F kandseente lakaasi geenide diversiteet mulla eri horisor  
 Lukac M, Calfapietra C, Godbold DL. 2003. Production, turnover and mycorrhizal c  
 Lumbsch HT, Buchanan PK, May TW, Mueller GM. 2008. Phylogeography and bio  
 Lumbsch HT, Schmitt I, Palice Z, Wiklund E, Ekman S, Wedin M. 2004. Supraordi  
 Lumbsch T, Huhndorf SM. 2007. Notes on ascomycete systematics. Outline of Ascc  
 Lumley TC, Farquhar ML, Peterson RL. 1995. Ectomycorrhiza formation between F  
 Lundberg DS, Lebeis SL, Paredes SH, Yourstone S, Gehring J, Malfatti S, Tremblay

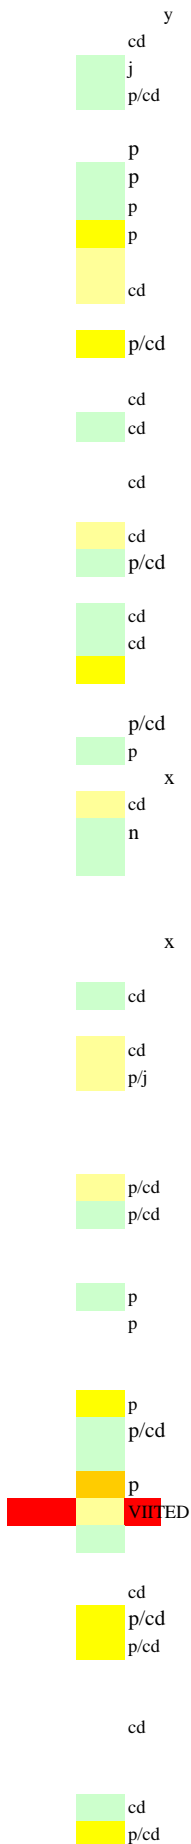

Lundberg DS, Yourstone S, Mieczkowski P, Jones CD, Dangl JL. 2013. Practical in Lunt PH, Hedger JN. 2003. Effects of organic enrichment of mine spoil on growth a Luoma DL, Frankel RE. 1991. Fruiting of hypogeous fungi in Oregon Dou hüpogelli Luoma DL, Stockdale CA, Nosaliselt raiutud aladel: kokku 108 liiki. Kasvamajäetud Luppaini M, Chondrogaster angustisporus BRA Eukulaptidel Luppaini M, Byssocorticium atrovirens, Cortinarius multififormis, Lact chry Lusk DE. 1987. Pseudaleuria quinaultiana, a new genus and species of operculate Lüttge U, Haridasan M, Fernandes GW, de Mattos EA, Trimborn P, Franco AC, Ca Lutzoni F, Kauff F, Cox CJ and 41 others. 2004. Assembling the fungal tree of life: j Lutzoni F, Pagel M, Reeb V. 2001. Major fungal lineages are derived from lichen sy Lutzoni F, Pagel M. 1997. Accelerated evolution as a consequence of transitions to r Lyman DR, Hoyle RH, Newman JP. 2006. The perils of partialling. Assessment 13: Lynch MDJ, Thorn RG. 200 mullaseened põllul: klaadidest domin Clavariac Lyons JI, Alber M, Hollibaugh JT. 2010. Ascomycete fungal communities associate Lyons KG, Schwartz MW. 2001. Rare species loss alters ecosystem function -invasi M. Guttenberger I ,H.Zick,H.Thelen,T.Wallendaand R.Hampp. 1998. The effect of Ma L-J, van der Does HC, Borkovich KA, Coleman JJ, Daboussi MJ, Di Pietro A. Ma M, Tan TK, Wong SM. 2003. Identification and molecular phylogeny of Epulori Mabru et al. 2001. Rapid molecular typing method for the reliable detection of Asiat MacGregor BJ, Brüchert V, Fleischer S, Amann R. 2002. Isolation of small-subunit Macia-Vicente JG, Jansson H-B, Abdullah SK, Descals E, Salinas J, Lopez-Llorca I Maddison WP, Maddison DR. 2005. Mesquite: A modular system for evolutionary r Madrid VM, Aller JY, Aller bakterid ja arhed Pr Guajaana setetes: pms proteobakte Madrid VM, Taylor GT, Scanton MI, Chistoserdov AY. 2001. Phylogenetic diversit Maeda M. 1954. The meaning of mycorrhiza in regard to systematic botany. Kumar Maestre FT, Quero JL, Gotelli NJ, Escudero A, Ochoa V, Delgado-Baquerizo M. 20 Maeta K, Ochi T, Tokimoto K, Shimomura N, Maekawa N, Kawaguchi N, Nakaya Maguire B, Ashton PS, de Zeeuw C, Giannasi DE, Niklas KJ. 1977. Pakaraimoidea Magurran AE. 1988. Ecological diversity and its measurement. Princeton University Magurran AE, Henderson PA. 2003. Explaining the excess of rare species in natural Magyar L, Beenken L, Jakucs E. 1999. Inocybe heimii + Fumana procumbens. De: Mah K, Tackaberry LE, Egg vana vs raiutud vs vana mets: Russula, Thelephora, He Mahé S, Duhamel M, Le Calvez T, Guillot L, Sarbu L, Bretau deau A, Collinet O. Maherali H, Klironomos J. 2012. Phylogenetic and trait-based assembly of arbuscul Maherali H, Klironomos JN. 2007. Influence of phylogeny on fungal community ass Mahmood S, Finlay RD, Erik koristatud mets vs Cortinarius, Thelephora, Lactarius th Mahmood S, Finlay RD, Fransson A-M, Wallander H. 2003. Effects of hardened wo Mahmood S, Finlay RD, Wa muld vs tuhagraai Kontroll: Cortinarius sp3, Tylospora Mahmood S. 2003. Colonisation of spruce roots by two interacting ectomycorrhizal Maia LC, Yano AM, Kimbrough JW. 1996. Species of Ascomycota forming ectomy Maier E, Tollrian R, Nürnberger B. 2001. Development of species-specific markers Majjala P, Fagerstedt KV, Raudaskoski M. 1991. Detection of extracellular celluloly Maitland TD, Wakefield EM. 1917. Notes on Uganda fungi. Royal Botanic Gardens, Makana J-R, Thomas SC. 2006. Impacts of selective logging and agricultural clearin Makana J-R. 2005. Effects of light gaps and litter removal on the seedling perform Malajczuk N, Dell B, Bougher NL. 1987. Ectomycorrhiza formation in Eucalyptus . Malajczuk N, Hartney VJ. 1986. Procedure for inoculation of micropropagated plani Malajczuk N Eucalyptus mar Eucalyptus marginata EcM tüüptide Ohtrus sõltub aasta Malajczuk N, McComb AJ, Loneragan JF. 1975. Phosphorus uptake and growth of Malajczuk N sünteesisitud euka sünteesisitud eukalüptidel vs mänd Malajczuk N, Molina R, Trappe JM. 1984. Ectomycorrhiza formation in Eucalyptus Malajczuk N 4 tüüpi Eucalyptus marginata, E calophylla: mantli str, peremehepets. 1 Malloch D, Malloch B. 1982. The mycorrhizal status of boreal plants: additional spe Malloch D, Thorn RG. 1985. The occurrence of ectomycorrhizae in some species of Malloch D. 1987. The evolution of mycorrhizae. Can. J. Plant Pathol. 9: 398-402. Malloch DW, Pirozynski KA, Raven, PH. 1980. Ecological and evolutionary signific Mamoun M, Oliver JM. 199 vs steriilne pinna vs Festuca ovina Mamoun M, Olivier JM. 1993. Competition be Tuber melanosporum vs T. brumale ( Mamoun M, Olivier J-M. 19 tuberiga inokulee Tuber vanadel juurtel, noorematel ju Mandyam K, Jumpponen A. 2005. Seeking the elusive function of root-colonizing di Manfield M, Whiteley AS, Griffiths RI, Bailey MJ. 2002. RNA stable isotope prob Manerkar MA, Seena S, Bärlocher F. 2008. Q-RT-PCR for Assessing Archaea, Bacte Mangan SA, Schnitzer SA, Herre EA, Mack KLM, Valencia MC, Sanchez EI, Beve Manian S, Sreenivasaprasad S, Bending GD, Mills PR. 2001. Genetic diversity and Manley SAM, Ledig T. 1979. Photosynthesis in black and red spruce and their hybri Manner HI, Elevitch CR. 2006. Gnetum gnemon (gnetum). In: Elevitch CR, ed. Spe Manos PS, Doyle JJ, Nixon KC. 1999. Phylogeny, biogeography, and processes of r Manos PS, Stanford AM. 2001. The historical biogeography of Fagaceae: tracking th

cd  
cd  
  
cd  
cd  
cd  
p/cd  
cd  
b  
  
cd  
cd  
  
cd  
p  
  
p  
  
cd  
cd  
j  
  
p/cd  
p/cd  
p/cd  
p  
  
cd  
j  
p/cd  
p/cd  
  
p  
  
p  
p  
  
p  
  
p  
p  
  
p  
  
p  
p  
  
p  
  
p  
p  
  
p  
  
j

Mansur M, Suarez T, Fernandez-Larrea JB, Brizuela MA, Gonzalez AE. 1997. Iden  
Mansur M, Suarez T, Gonzales AE. 1998. Differential gene expression in the laccas  
Manter DK, Weir TL, Vivanco JM. 2010. Negative effects of sample pooling on PC  
Manzoni S, Schimel JP, Porporato A. 2012. Responses of soil microbial communitie  
Maraun M, Erdmann G, Schulz G, Noton RA, Scheu S, Domes K. 2009. Multiple co  
Maraun M, Schatz H, Scheu S. 2007. Awesome or ordinary? Global patterns of orib  
Marçais B, Martin F, Delatour C. 1997. Structure of *Collybia fusipes* popu *Collybia*  
Marcial Gomes NC, Fagbola *maisi risosfäär* Brasíllias: 20 p vs 90p, risosf vs eemal:  
Marek SM, Hansen K, Romanish M, Thorn RG. 2009. Molecular systematics of the  
Maremmani A, Bedini S, Matosevic I, Tomei PE, Giovanetti M. 2003. Type of myc  
Marincovich L, Gladenkov AY. 1999. Evidence for an early opening of the Bering S  
Markgraf V, Romero E, Villagran C. 1996. History and paleoecology of South Ame  
Markham JH. 2008. Population size effects on germination, growth and symbiotic ni  
Markham JH. 2008. Variability of nitrogen-fixing Frankia on *Alnus* species. Botany  
Markkola A, Kuikka K, Rautio P, Härmä E, Roitto M, Tuomi J. 2004. Defoliation in  
Markkola AM, Ahonen-Jonn *Lapimaa männikt Suilloid-tüüp, hoolimata katsest*  
Markkola AM, Ohtonen R, Tarvainen O, Ahonen-Jonnarh U. 1995. Estimates in fu  
Marlowe EM, Hogan JJ, Hindler JF, Andruszkiewicz I, Gordon P, Bruckner DA. 20  
Maron JL, Jeffries RL. 2001. Restoring enriched grasslands: effects of mowing on s  
Marr CD. 1979. Laccase and tyrosinase oxidation of spot test reagents. *Mycotaxon* |  
Marshall JD, Ehleringer JR. 1990. Are xylem-trapping mistletoes partially heterotro  
Martel A, Blooi M, Adriaensen C, van Rooij P, Beukema W, Fisher MC et al. 2014.  
Martin AP. 2002. Phylogenetic approaches for describing and comparing the diversi  
Martin F, Delaruelle C, Ivory M. 1998. Genetic variability in intergenic spacers of ri  
Martin F, Diez J, Dell B, Delaruelle C. 2002. Phylogeography of the ectomycorrhiza  
Martin F, Duplessis S, Ditengou F, Lagrange H, Voiblet C, Lapeyrie F. 2001. Devel  
Martin F, Kohler A, Murat C, Balestrini R, Coutinho PM, Jaillon O et al. 2010. Peri  
Martin F, Nehls U. 2009. Harnessing ectomycorrhizal genomics for ecological insigl  
Martin F, Selosse M-A, Le Tacon F. 1999. The nuclear rDNA intergenic spacer of tl  
Martin KJ, Rzygiewic PT. 2005. Fungal-specific PCR primers developed for analysi  
Martin MP, Raidl S, Telleria MT. 2004. Molecular analyses confirm the relationship  
Martin MP, Rocabrana A. 1999. The taxonomic boundaries between *Naucoria rheo*  
Martinelli LA, Piccolo MC, Townsend AR, Vitousek PM, Cuevas E, McDowell W,  
Martin-Laurent F, Philippot L, Hallet S, Cahussod R, Germon JC, Soulas G, Catrou  
Martino E, Turnau K, Giralda M, Bonfante P, Perotto S. 2000. Eroid mycorrhizal  
Martin-Pinto P, Vaquerizo H, Penalver F, Olaizola J, Orié-de-Rueda JA. 2 *pölungud*  
Martos F, Dulorme M, Pailler T, Bonfante P, Faccio A, Fournel J, Dubois M-P, Se  
Martos F, Munos F, Pailler T, Kottke I, Gonneau C, Selosse M-A. 2012. The role of  
Marx DH, Bryan WC, Grand LF. 1970. Colonization, isolation, and cultural descript  
Marx DH, Hatch AB, Medicino JF. 1977. High soil fertility decreases sucrose cont  
Marx DH, Jarl K, Ruehle JL, Bell W. 1984. Development of *Pisolithus tinctorius* ect  
Marx DH, Kenney DS. ??? Pages 131-146. *Production of Ectomycorrhizal Fungus* |  
Marx DH, Ross EW. 1970. Aseptic synthesis of ectomycorrhizae on *Pinus taeda* by  
Marx DH, Ross EW. 1970. Aseptic synthesis of ectomycorrhizae on *Pinus taeda* by  
Marx DH, Rowan SJ. 1981. Fungicides influence growth and development of specif  
Marx DH. 1971. Ectomycorrhizae as Biological Deterrents to Pathogenic Root Infec  
Marx DH. 1973. Mycorrhiza *ECM rohkus, mitmekesisus* vs patogeend  
Mason PA, Ibrahim K, Ingleby K, Munro RC, Wilson J. 2000a. Mycorrhizal develo  
Mason PA, Ingleby K, Munro RC, Wilson J, Ibrahim K. 2000b. Interactions of nitro  
Mason PA, Ingleby K, Munro RC, Wilson J, Ibrahim K. 2000c. The effect of reduce  
Mason PA, Last FT, Pelham J, Ingleby K. 1982. Ecology of some fungi as *arukask* v  
Mason PA, Wilson J, Last FT. 1983. The concept of succession in relation to the spr  
Massicotte | *ECM anatoomia* eri lehtpuudel-sarnane, juure paksus sõltus koloniseeri  
Massicotte | *Alpova-Alnus*; eri lepa liigid: Hartigi võrgustiku sissekasved erinevad  
Massicotte | *Kobresia, Polygonum*: üldanatoomia  
Massicotte | *Rhizopogon* vs *Truncocolumella* sünt ja EcM SEM kirjeldus  
Massicotte HB, Melville LH, Peterson RL, Unestam T. 1999. Comparative studies c  
Massicotte | *Laccaria bicolor* viljakehade tekke anatoomia: sõlmekestes, tihenened p  
Massicotte | *Pyrola, Chimaphila, Orthilia, Moneses*: mantel hästi arenened  
Massicotte | *Rhizopogon* jt maasisesed  
Massicotte | xxx, kirjeldused eri puuliikidel sama inokulumiga mullal  
Massicotte | *Alpova-Alnus*; vs mittemükör juur  
Massicotte | *Cenococcum*: sklerootsiumid  
Masui K. 1926. A Study of the Ectotrophic mycorrhiza of *Alnus*. *Memoirs Alnus* ja  
Masui K. 19 *Tricholoma männil, Cortinarius männil, haaval, Gomphus flo*  
Materials and Methods  
Matheny PB, Aime MC, Bougher NL, Buyck B, Desjardin D, Horak E, Kropp BR, l  
Matheny PB, Aime MC, Henkel TW. 2003. New species of *Inocybe* from Dicymbe

p/cd  
 p/cd  
 p/cd  
 cd  
 p/cd  
 cd  
  
 cd  
  
 p  
  
 cd  
 p/cd  
  
 p  
 p  
 p  
 cd  
 p/cd  
  
 p  
 p/cd  
 cd  
 cd  
 cd  
 p/cd  
  
 1  
  
  
 p/cd  
 p/cd  
 p/cd  
 p  
 p/cd  
 p  
  
 p  
 p/cd  
 p/cd  
 p/cd  
 p/cd  
  
 cd  
 cd  
 p/cd  
  
 p  
 p  
  
 p/cd  
 p/cd  
 p/cd  
 p/cd

Matheny PB, Bougher NL. 2006. The new genus *Auritella* from Africa and Australia  
 Matheny PB, Curtis JM, Hofstetter V and 22 others. 2006. Major clades of Agarical  
 Matheny PB, Gossmann JA, Zalar P, Arun Kumar TK, Hibbett DS. 2007. Resolving  
 Matheny PB, Liu YJ, Ammirati JF, Hall BD. 2002. Using RPB1 sequences to impro  
 Matheny PB, Wang Z, Binder M and 24 others. 2007. Contributions of rpb2 and tef  
 Matheny PB. 2005. Improving phylogenetic inference of mushrooms with RPB1 and  
 Mathur J, Bizzoco RW, Ellis DG, Lipson DA, Poole AW, Levine R, Kelley ST. 200  
 Matsuda Y, Hijii N. 1999. Characterization and identification of *Strobilomyces conf*  
 Matsuda Y, Hijii N. 2004. E **nulg Abies firma seemikutel ja vanadel puudel** Russul  
 Matsuda Y, Noguchi Y, Ito S **Pinus thunbergii: 1-5 aastastel seemikutel sukt**  
 Matsui M, Fowler JH, Walling LL. 2007. Leucine aminopeptidases: diversity in stru  
 Matthies D. 1996. Interactions between the root hemiparasite *Melampyrum arvense*  
 Mattiolo O. 1887. Sul parassitismo dei Tartufi e sulla quistione delle Mycorrhizae. M  
 Mattison EHA, Norris K. 2005. Bridging the gaps between agricultural policy, land-  
 Maury-Lechon G, Curtet L. 1998. Biogeography and evolutionary systematics of Di  
 May TW, Dunk C, Lebel T. 2006. Austral ectomycorrhizas overlooked. Mycol. Res  
 May TW, Simpson JA. 1997. Fungal diversity and ecology in eucalypt ecosystems. I  
 May TW. 2001. Documenting the fungal biodiversity of Australasia: from 1800 and  
 May TW. 2002. Where are the short-range endemics among western Australian mac  
 Mayaux P, Bartholome E, Fritz S, Belward A. 2004. A new land-cover map of Afric  
 Mayor JR, Henkel TW. 2006. Do ectomycorrhizas alter leaf-litter decomposition in  
 Mayor JR, Schuur EAG, Henkel TW. 2009. Elucidating the nutritional dynamics of  
 Mayor JR, Schuur EAG, Mack MC, Hollingsworth TN, Baath E. 2012. Nitrogen isc  
 McAfee BJ, Fortin JA. The influence of pH on competitive interactions of ectomyc  
 McAfee BJ, Fortin JA. 1986. Competitive interactions of ectomycorrhizal mycobion  
 McArdle BH, Anderson MJ. 2001. Fitting multivariate models to community data: a  
 McCaig AE, Glover LA, Pro **bakterid 16S rDNA** majandatud vs majandamata rohun  
 McCaig AE, Glover LA, Prosser JL. 2001. Numerical analysis of grassland bacterial  
 McCormick MK, Taylor DL, Juhaszova K, Burnett RK, Whigham DF, O'Neill JP. 2  
 McCormick MK, Whigham J **OrM: Cephalanthera austineae (MHP): Tomentella spp**  
 McCormick MK, Whigham DF, O'Neill JP, Becker JJ, Werner S, Rasmussen HN, B  
 McCormick MK, Whigham DF, Sloan D, O'Malley K, Hodgkinson B. 2006. Orchid-  
 McCune B, Mefford MJ. 1999. Multivariate Analysis of Ecological Data Ver. 4.01.  
 McCune B, Mefford MJ. 2006. PC-ORD. Multivariate Analysis of Ecological Data.  
 McDonald KR, Pennell J, Fr *Cercocarpus* vs *Pezizales*, Inoc, Tom-thele  
 McDougall WB, Jacobs MC. 1927. Tree mycorrhizas from the central Rocky Mount  
 McDougall WB, Liebtog C. 1928. Symbiosis in a deciduous forest. Bot. Gaz. 86: 22  
 McDougall **Russula, Cortinarius, Leccinum scabrum, Scleroderma mikc**  
 McDougall. 1928. Mycorrhizas from North Carolina and Eastern Tennessee. Bot. G  
 McFadden B. 2006. Extinct mammalian biodiversity of the ancient New World tropi  
 McGee PA, Bullock S, Summerell BA. 1999. Structure of mycorrhizae of the Wolle  
 McGee PA, **Ceratopetalum apetalum: VAM ja 1-rakukihise mantliga ilma HN-ta Ec**  
 McGee PA, Trappe JM. 2002. The Australian zygomycetous mycorrhizal fungi. II. I  
 McGee PA. 1986. Mycorrhizal associations of plant species in a semiarid communit  
 McGee PA. 1988. **Growth response to and morphology of mycorrhizas of Thysanot**  
 McGee PA. 1988. **Growth response to and morphology of mycorrhizas of Thysanot**  
 McGee PA. **Densospora (Endogonaceae) -EcM seened seigseente hulgas. Densospo**  
 McGuire KL, Bent E, Borneman J, Majumder A, Allison SD, Treseder KK. 2010. F  
 McGuire KL, Fierer N, Bate: seente liigirikkus kodus (SSU!!!) ei sõltu taime  
 McGuire KL, Henkel TW, Cerda IG, Villa G, Edmund F, Andrew C. 2008. Dual my  
 McGuire KL, Zak DR, Edwards IP, Blackwood C, Upchurch R. 2010. Slowed deco  
 McGuire KL. 2007. Common ectomycorrhizal networks may maintain monodominan  
 McGuire KL. 2007. Recruitment dynamics and ectomycorrhizal colonization of Dic  
 McHugh TA, Gehring CA. 2 **Pinus edulis Arizona: Pinus edulis Arizonas: 5 liiki** Geopor  
 McKendrick SL, Leake JR, Read DJ. 2000. Symbiotic germination and developmen  
 McKendrick SL, Leake JR, Taylor DL, Read DJ. 2000. Symbiotic germination and  
 McKendrick SL, Leake JR, **Neottia 2 Sebacina spp**  
 McKenzie EHC, Buchanan PK, Johnston PR. 2000. Checklist of fungi on **Uus-Mer**  
 McLaughlin DJ. 1974. Fruitbody formation by *Tylophila Felleus* in axenic culture. M  
 McLoughlin S. 2001. The breakup history of Gondwana and its impact on pre-Ceno  
 McMullan-Fisher SJM, May TW, Keane PJ. 2002. The macrofungal comm **eukalüpti**  
 McNabb RFR. 1961. Mycorrhiza in the New Zealand Ericales. Aust. J. Bot. 9: 57-6  
 McNabb RFR. 1967. The Boletaceae of New Zealand. N. Z. J. Bot. 6: 137-176.  
 McNabb RFR. 1967. The Strobilomycetaceae of New Zealand. N. Z. J. Bot. 5: 532-  
 McVean DN. 1955. Ecology of *Alnus glutinosa* (L.) Gaertn. IV. Root system. J. Ec  
 McVean DN. 1955. Ecology of *Alnus glutinosa* (L.) Gaertn. III. J. Ecol. 43: 195-218  
 Medail F, Diadema K. 2009. Glacial refugia influence plant diversity patterns in the  
 Medardi G. 2005. Un rare ascomycete recolté en Italie *Sowerbyella crassisculptura*

cd  
 p  
 cd  
 p  
 cd  
 p  
 p  
 p  
 cd  
 cd  
 p  
 p/cd  
 p/cd  
 p/cd  
 p  
 p/cd  
 j  
 p  
 (cd)  
 cd  
 p/cd  
 j  
 p/cd  
 p  
 p

2

x

Meerts P. 1999. The evolution of spore size in agarics: do big mushrooms **eo** **suur**  
 Meharg AA. 2003. The mechanistic basis of interactions between mycorrhizal assoc  
 Meier CL, Bowman WD. 2008. Links between plant litter chemistry, species diversi  
 Meier IC, Avis PG, Phillips I **Pinus USA: seenekoosluse mõju eksudatsioonil**  
 Mei-ling X, Jiao-jun Z, Hong-zhang K, Ai-hua X, Jin-xin Z, Feng-qin L. 2008. Opti  
 Meinhardt K, Gehring CA. 2 **Populus fremontii**; vs Tamarix: invasiivne tam  
 Meiser A, Balint M, Schmitt I. 2014. Meta-analysis of deep-sequenced fungal comm  
 Mejstrik V, Benecke U. 1969. The ectotrophic mycorrhizas of *Alnus viridis* and thei  
 Mejstrik V. **Cenococcum Nothofagus solandrii ja Pinus radiatal**  
 Mejstrik V. **xxx. Lepa J EcM mantli paksus varieerub eri paikades ja süga**  
 Mejstrik V. **Nothofagusel U EcM tüüpidel ses**oonne varieerub minimaalne  
 Mejstrik V. **Nothofagus solandrii NZL. Üldiselt domin samad tüübid, mis**  
 Mejstrik V. 1975. The effect of mycorrhizal infection of *Pinus sylvestris* and *Picea*  
 Mejstrik V. 1976. The ecology of mycorrhiza in plants from peat bog areas of the T  
 Melin E, Nilsson H, Hacskaýlo E. 1958. Translocation of cations to seedlings of pin  
 Melin E. 1921. Über die mykorrhizenpilze von *Pinus sylvestris* L. und *Picea abies* t  
 Melin E. 1922. Untersuchungen über die *Larix*-Mykorrhiza. I. Synthese der mykorr  
 Melin E. 1923. Experimentelle Untersuchungen über die Birken- und Espenmykorrh  
 Melin E. 1923. Experimentelle Untersuchungen über die Konstitution und Ökologie  
 Melin E. 1924. Über den Einfluss der Wasserstoffionenkonzentration auf die Viruler  
 Melin E. 1924. Zur Kenntnis der Mykorrhizapilze von *Pinus montana* Mill. Bot. Nc  
 Melin E. 1925. *Betula nana* och *Boletus scaber*. Bot. Not. 5: 63-65.  
 Melin E. 1925. Untersuchungen über die *Larix*-Mykorrhiza II. Zur weiteren kenntni  
 Melin E. 1936. Methoden der Experimentellen Untersuchung mykotropher Pflanzen.  
 Melin E. 1946. Der einfluss von waldstreuextrakten auf das wachstum von bodenpil.  
 Melin E. 1954. Growth factor requirements of mycorrhizal fungi of forest trees. Svei  
 Mello A, Cantisani A, Vizzini A, Bonfante P. 2002. Genetic variability of Tuber unc  
 Mello A, Fe **Tuber magnatum** -esinevad tsüstiidid, mida varasemad uurijad pole tähe  
 Mello A, Garnero L, Bonfante P. 1999. Specific PCR-primers as a reliable tool for ti  
 Mello A, Nosenzo C, Meotto F, Bonfante P. 1998. Rapid typing of truffle mycorrhiz  
 Mello A, Vizzini A, Longato S, Rollo F, Bonfante P, Trappe JM. 2000. Tuber borch  
 Melo AS, Pereira RAS, Sant **liigirikuse ekstr**apoleerimine proovipõhistel andmetel  
 Melville LH, Massicotte HB, Peterson RL. 1987. Ontogeny of early stages of ectom  
 Memmott J, Waser NM. 2002. Integration of alien plants into a native flower-pollina  
 Mendgen K, Hahn M. 2002. Plant infection and the establishment of fungal biotroph  
 Menkis A, Allmer J, Vasilias **DSE juuretippudes**, lagujuurtes, kändudes, elusjuurtes,  
 Menkis A, Uotila A, Arhipov **Picea abies raielankidel: kändude ja sodi** eemal  
 Menkis A, Urbina H, James TY, Rosling A. 2014. Archaeorhizomyces borealis sp. r  
 Menkis A, Vasaitis R. 2011. **Pinus LIT taim Hebeloma, Suillus, Wilcoxina, i**  
 Menkis A, Vasilias R, T **juurega seotud se mänd: Unkn, Thelephora, Hymenosc**  
 Menkis A, Vasilias R, T **inokuleeritud ja istutatud kuused: A. byssoides**  
 Menkis A, Vasilias R, Taylor AFS, Stenlid J, Finlay RD. 2005. Fungal commun  
 Menkis,A., Uotila,A., Arhipova,N. and Vasaitis,R.; Effects of stump and slash remo  
 Menoyo E, Becerra AG, Renison D. 2007. Mycorrhizal associations in *Polylepis w*  
 Meotto F, N **Tuber magnatum**, albidum, brumale -mood cys; T. Melanosporum, aesti  
 Merckx V, Bidartondo MI 2008. Breakdown and delayed cospeciation in the arbusc  
 Merckx V, Bidartondo MI, Hynson NA. 2009. Myco-heterotrophy: when fungi host  
 Merckx VSFT, Janssens SB, Hynson NA, Specht CD, Bruns TD, Smets EF. 2012. M  
 Mexal J, Reid CPP. 1973. The growth of selected mycorrhizal fungi in response to i  
 Meyer F, Paarmann D, D'Souza M, Olson R, Glass EM, Kubal M, Paczian T, Rodri  
 Meyer U. 1991. Feinwurzelsysteme und Mykorrhizatypen als Anpassungsmechanisi  
 Miadlikowska J, Kauff F, Hofstetter V, Fraker E, Grube M, Hafellner J, Reeb V, Hc  
 Michelangeli FA, Penneys DS, Giza J, Soltis D, Hills MH, Dan Skea Jr. J. 2004. A  
 Michelitsch A, Zelling K, Baumeister A, Schubert-Zsilavecz, Likussar W. 1997. Gel  
 Michelot D, Melendez-Howell LM. 2003. Amanita muscaria: chemistry, biology, to:  
 Michelsen A, Quarmby C, Sleep D, Jonasson S. 1998. Vascular plant 15N abundanc  
 Michelsen A, Schmidt IK, Jc **alpitaimede MR**  
 Midgley DJ, Chambers SM, Cairney JWG. 2002. Spatial distribution of fungal endo  
 Midgley DJ, Chambers SM, **ErM seened Wool**lsia ja *Leptospermum terves* juurestik  
 Midgley DJ, Saleeba JA, Ste **mulla kandseente Ceratobasidium, Thelephora**les jp sa  
 Mihail JC, Bruhn JN, Leininger TD. 2002. The effects of moisture and oxygen avail:  
 Mihail JD, Bruhn JN, Bonello P. 2007. Spatial and temporal patterns of morel fruitir  
 Mikola J, Setälä H. 1998. **Relating species diversity to ecosystem functioning: mech**  
 Mikola P, Laiho O, Erikäinen J, Kuvaja K. 196 **peale põletamist ilmub esimesena** Wi  
 Mikola P. 1948. On the physiology and ecology of *Cenococcum graniforme*. Forest  
 Mikola P. 1955. Artificial inoculation of mycorrhizal fungi. Arch. Soc. Zool. Bot. Fe  
 Mikola P. 1958. Liberation of nitrogen from alder leaf litter. Acta For. Fenn. 1-10.  
 Mikola P. I **Wilcoxina-ektendoMR** kuusk vs mänd; N-väetades rakusis kolonis vähe



cd  
cd  
p/cd

p/cd  
p/cd  
p/cd  
cd  
cd  
cd

p  
p/cd

p  
p/cd

p

cd  
cd  
cd  
1  
p

cd  
p/cd

p/cd  
p/cd  
p/cd  
p/cd  
j  
cd

p/cd  
j  
p/cd  
p/cd

cd  
p/cd  
cd

p  
cd  
p/cd  
p/cd

Moreau P-A, Rochet J, Bizio E, Deparis L, Peintner U, Senn-Irlet B, Tedersoo L, G: Moreau P-A, Rochet J, Richard F, Chassagne F, Manzi S, Gardes M. 2011. Taxono: Moreira MT, Feijoo G, Lema JM. 2000. Manganese peroxidase production by Bjerk Moreira MT, Torado A, Lema JM. 2000. Manganese peroxidase production by Bjerk Morel M, Jacob C, Kohler A, Johansson T, Martin F, Chalot M, Brun A. 2005. Iden Moreno-Arroyo B, Gómez J, Pulido E. 2000. Ecología de los hongos hipogeos de A Morgado LN, Semenova T, 'kliima soojene mine tundras: nniiskas tundras E Morgenstern I, Klopman S, Hibbett DS. 2008. Molecular evolution and diversity of Morlon H, Chuyong G, Condit R, Hubbell S, Kenfack D, Thomas D, Valencia R, G Morris B. 1988. Common Mushrooms of Malawi. Oslo, Norway. Morris B. 1990. An annotated check-list of the macrofungi of Malawi. Department c Morris MH, Perez-Perez M, S-Mex pilveme Tom-Thel 6; Russ-Lact 7; Inocy Morris MH, Perez-Perez MA, Smith ME, Bledsoe CS. 2009. Influence of host speci Morris MH, Smith ME, Rizz 2 tammeliiki: sar Tomentella (35liiki +2 fibrosat), Inoc Morris RJ, Gripenberg S, Lewis OT, Roslin T. 2014. Antagonistic interaction netwo Morris SA, Radajewski S, Willison TS, Murrell JC. 2002. Identification of the funct Morrison DA, Ellis JT. 2003. The design and analysis of microarray experiments: ap Morte A, Diaz G, Rodriguez P, Alarcon JJ, Sanchez-Blanco MJ. 2001. Growth and Morte MA, Cano A, Honrubia M, Torres P. 1994. In vitro mycorrhization of microp Morte MA, Honrubia M, 1992. in vitro propagation of Helianthemum almarisense (Ci Morton A, Tabrett AM, Carder JH, Barbara DJ. 1995. Sub-repeat sequences in the r Mosca E, Montecchio L, Scattolin L, Garbaye J. 2007. Enzymatic activities of three Moser AM, Frank JL, D'Alh Quercus garrya Tuber candidum, Cenoc, Tomei Moser AM, Petersen CA, D' serpentiin vs kont morfot Moser M. 1986. Cortinarius Fr. Subgen. Cortinarius in the SW Pacific area. Sydowi Moser M. 2001. Some aspects of Cortinarius associated with Alnus. J. des J.E.C. 3: Moser M. Die künstliche Mykorrhizainpfung an Forstpflanzen. Forstwiss. Centralbl Moser MM. 2004. Subalpine conifer forests in the Alps, the Altai and the Altai vs / Motomura H, Selosse M-A, Martos F, Kagawa A, Yukawa T. 2011. Mycoheterotro Möttönen M, Lehto T, Aphalo P. 2001. Growth dynamics and mycorrhizas of Norw Mouhamadou B, Molitor C, Baptist F, Sage L, Clement J-C, Lavoirel S, Monier A, C Mouquet N, Devictor V, Meynard C, Munoz F, Bersier L-F, Chave J and 16 others. Moyersoen B, Becker P, Alexander JJ. 2001. Are ectomycorrhizas more abundant th Moyersoen B, Beaver RE, Martin F. 2003. Genetic diversity of Pisolithus in New Z Moyersoen B, Fitter AH. 1999. Presence of arbuscular mycorrhizas in typically ectc Moyersoen Lõuna-Venezuela Caatinga EcM taimed on Neea, Guapira, Al Venezue Moyersoen Pakaraimeal: Cl Pakaraimea Moyersoen B. 2012. Dispers Pakaraimea Ve domin tom-thel, bol, cort , russ- Mueller GM, Pine EM. 1994. DNA data provide evidence on the evolutionary relati Mueller GM, Schmit JP, Leacock PR, Buyck B, Cifuentes J, Desjardin DE, Halling Mueller GM, Wu Q-X, Huang Y-Q, Guo S-Y, Aldana-Gomez R, Vilgalys Aasia vs Mueller RC, Gehring CA. 2( Pinus edulis ARI; parasiidiga: pms kotteseed, mis omk Mueller UG, Gerardo NM, Aanen DK, Six DL, Schultz TR. 2005. The evolution of Mühlmann O, Bacher M, Pei Polygonum vivip; Sebacina incrustans, Cenococcum ge Mühlmann O, Peintner U. 20 Kobresia mysu Cenococcum , Tomentella spp Mühlmann O, Peintner U. 20 Salix herbacea: n Tomentella=Cortinarius=Inocybe (5) Muhsin TM, Zwiazek JJ. 2002. Colonization with Hebeloma crustuliniforme increas Muhsin TM, Zwiazek JJ. 2002. Ectomycorrhizas increase apoplatic water transport Muller LAH, Lambaerts M, Vangronsveld J, Colpaert JV. 2004. AFLP-based assess Muller LAH, Lambaerts M, Vangronsveld J, Colpaert JV. 2006. Isolation and chara Müller WH, Stalpers JA, van Aelst AC, de Jong MDM, van der Krift TP, Boekhout Mulombwa J 1998. Non-wood forest products in Zambia. In: FAO, ed. Data collecti Mummey DL, Rillig MC. 2007. Evaluation of LSU rRNA-gene PCR primers for an Mundra S, Halvorsen R, Kat Arktikas . Seenekooslused ja taimekooslused oi Münkemüller T, Lavergne S, Bzeznik B, Dray S, Jombart T, Schifffers K, Thuiller W Munos J, Felicísimo AM, Cabezas F, Burgas AR, Martínez I. 2004. Wind as a long- Münzenberger B, Bubner B, Wöllecke J, Sieber TN, Bauer R, Fladung M, Hüttel R Münzenberger B, Golladack J ligniidi kaevandu: Amphinema, Wilcoxina, Tuber puber Münzenberger B, Metzler B, Kottke I, Oberwinkler F. 1986. Morphologische und a Münzenberger B, Otter T, Wüstrich D, Polle A. 1996. Peroxidase and laccase activi Münzenberger B, Schneider B, Nilsson RH, Bubner B, Larsson K-H, Hüttel R. 2012. Murai S. 1963. Phytotaxonomical and geobotanical studies on so-called genus Alnus Murat C, Diez J, Luis P, Delaruelle C, Dupre C, Chevalier G, Bonfante P, Martin F. Murat C, Rubini A, Riccioni C, de la Varga H, Akroume E, Belfiori B, Guaragno M Murat C, Vizzini A, Bonfant produktiivses vs i Thelephoraceae, Pezizales (sh 3 Tub Murat C, Zampieri E, Vizzini A, Bonfante P. 2008. Is the Perigord black truffle thre: Murat C. 2015. Forty years of inoculating seedlings with truffle fungi: past and futur







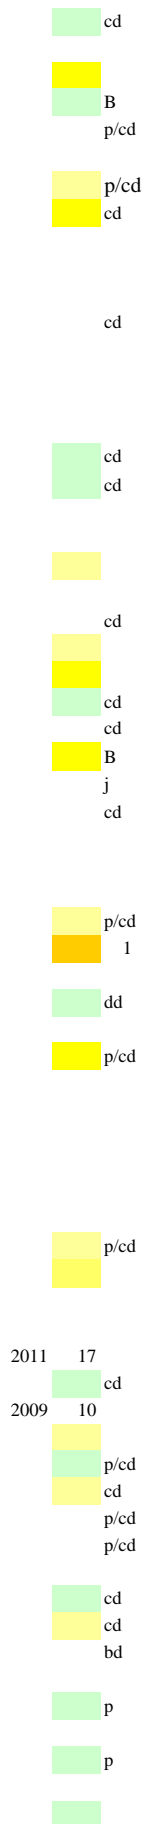

O'Brien MJ, Gomola CE, Horton TR. 2011. The effect of forest soil and community  
Odds FC, Brown AJP, Gow NAR. 2003. Antifungal agents: mechanisms of action. 1  
Ødegaard F, Diserud OH, Østbye K. 2005. The importance of plant relatedness for l  
O'Donnell K, Rooney AP, Mills GL, Kuo M, Weber NS, Rehner SA. 2011. Phyloge  
Ogden J, Stewart GH, Allen RB. 1996. Ecology of New Zealand Nothofagus forests  
Ogura-Tsujita Y, Gebauer G, Hashimoto T, Umata H, Yukawa T. 2009. Evidence fo  
Ogura-Tsujita Y, Yokoyama J, Miyoshi K, Yukawa T. 2012. Shifts in mycorrhizal fi  
Ogura-Tsujita Y, Yukawa T. 2008. *Epipactis helleborine* shows strong mycorrhizal  
Oh SK, Kamdem DP, Keathley DE, Han K-H. 2003. Detection and species identific  
O'Hanlon R, Harrington TJ. *Picea, Pinus, istandused vs Quercus IRL: BD s*  
Ohenoja E. 1978. Mushrooms and mushroom yields in fertilized forests. *A vs N-väe*  
Ohga S, Wood DA. 2000. Efficacy of ectomycorrhizal basidiomycetes on Japanese l  
Ohta A, Fujiwara N. 2003. Fruit-body production of an ectomycorrhizal fungus in gr  
Ohta A. 1994. Production of fruit-bodies of a mycorrhizal fungus, *Lyophyllum shim*  
Ohta A. 1998. Fruit-body production by two ectomycorrhizal fungi in the genus *Heb*  
Okayama M, Yamato M, Yagame T, Iwase K. 2012. Mycorrhizal diversity and spec  
Oksanen J, Blanchet FG, Kindt R, Legendre P, Minchin PR, O'Hara RB, Simpson G  
Oksanen L. 2001. Logic of experiments in ecology: is pseudoreplication a pseudois  
Oksanen L. 2004. The devil lies in details: reply to Stuart Hurlbert. *Oikos* 104: 598-  
Okuda A, Yamato M, Iwase K. 2011. The mycorrhiza of *Schizocodon soldanelloide*  
Olariaga I, Jugo BM, Garcia-Etxebarria, Salcedo I. 2009. Species delimitation in the  
Olesniewicz KS, Thomas RB. 1999. Effects of mycorrhizal colonization on biomass  
Olson A, Aerts A, Asiegbu F, Belbahri L, Bouzid O, Broberg A and 47 others. 2012  
Olson A, Stenlid J. 2001. Mitochondrial control of fungal hybrid virulence. *Nature* 4  
Olson A, Stenlid J. 2002. Pathogenic fungal species hybrids infecting plants. *Microb*  
Olson DM, Dinerstein E, Wikramanayake ED, Burgess ND, Powell GWN, Underw  
Olson LE, Yoder AD. 2002. Using secondary structure to identify ribosomal numts:  
Olsson M, Melillo JM, Christensen TR, Michelsen A, Wallander H, Olsson PA. 200  
Olsson PA, Jakobsen I, Wallander H. 2002. Foraging and Resource Allocation Strat  
Olsson PA, *Suillus+Gomphidius*  
Olsson PA, Wallander H. 1998. Interactions between ectomycorrhizal fungi and the  
Olsson PA, Wallander H. 1998. Interactions between ectomycorrhizal fungi and the  
Olsson PA, Wallander H. 1998. Interactions between ectomycorrhizal fungi and the  
Onguene NA, Kuyper TW. 2001. Importance of the ectomycorrhizal network for sec  
Onguene NA, Kuyper TW. 2001. Mycorrhizal associations in the rain forest of Sout  
Onguene NA. 2000. Diversity and dynamics of mycorrhizal associations in *Kamerun*  
Õpik M, Davison J, Moora M, Zobel M. 2014. DNA-based detection and identificat  
Õpik M, Moora M, Kõljalg I *AM diversiteet 2* *Pulsatilla liigil erikasukohtades vs ir*  
Õpik M, Moora M, Liira J, Kõljalg U, Zobel M, Sen R. 2003. Divergent arbuscular  
Õpik M, Moora M, Liira J, Zobel M. 2006. Composition of root-colonizing arbuscul  
Õpik M, Moora M, Zobel M, Saks Ü, Wheatley R, Wright F, Daniel T. 2008. High  
Õpik M, Vanatoa A, Vanatoa E, Moora M, Davison J, Kalwij JM, Reier Ü, Zobel M  
Õpik M, Zobel M, Cantero JJ, Davison M, Facelli JM, Hiiesalu I, Jairus T, Kalwij J  
Orgiazzi A, Dunbar MB, Panagos P, de Groot GA, Lemanceau P. 2015. Soil biodive  
Orihara T, Sawada F, Ikeda S, Yamato M, Tanaka C, Shimomura N, Hashiya M, Iw  
Orihara T, Smith ME, Shimomura N, Iwase K, Maekawa N. 2012. Diversity and sys  
Orlovich DA, Cairney JWG. 2004. Ectomycorrhizal fungi in New Zealand *NZL: Sec*  
Osono T. 2006. Role of phyllosphere fungi of forest trees in the development of dec  
Osono T. 2006. Role of phyllosphere fungi of forest trees in the development of dec  
Ostle NJ, Bol R, Petzke KJ, Jarvis SC. 1999. Compound specific d15N% values: an  
Ostonen I, Helmsaari H-S, Borken W, Tedersoo L, Kukumägi M, Bahram M, Lindro  
Ostonen I, *ECM mantli, korteksi ja steeli läbimõõt kuusel on eri aladel erinev, sõlt*  
Ostonen I, Tedersoo L, Suvi T, Lõhmus K. 2009. Does a fungal species drive ectom  
Otero JT, Ackerman JD, Bayman P. 2002. Diversity and host specificity of endophy  
Otero JT, Ackerman JD, Bayman P. 2004. Differences in mycorrhizal preferences b  
Ott T, Fritz E, Polle A, Schützendübel A. 2002. Characterisation of antioxidative sys  
Outerbridge RA, Trofymow *vana mets vs noo Rhizopogon, Cenoc, Tom=Piceirhiza*  
Outerbridge RA, Trofymow *Pseudotsuga istutatud raiesmikule eri kaugusel*  
Ovaskainen O, Hottola J, Siitonen J. 2010. Modeling species co-occurrence *kooseks*  
Øvreås L, Daae FL, Torsvik *bakterite ja arhede BD hüpersaliinses (kuni 32%) vees.*  
Øvreås L. 2000. Community *mikroobide BD mõõtmise põhjused ja mõõtmismeetod*  
Ozinga WA, van Andel J, McDonnell-Alexander MP. 1997. Nutritional soil heterog  
Paal J. 1997. Classification of Estonian Vegetation Site Types. 297 pp. UNEP, Talli  
Pachlewski R, Chrusciak E. 1980. Aktywnosc enzymatyczna mikoryzowych. II. Act  
Pachlewski *Quercus robur: eri EcM tüübid, sh Tuber*  
Pachlewski R, Kermen J, Chrusciak E, Trzcinska M. 1991. Studies on pine ectendo  
Pachlewski *Larix: eri EcM tüübid*  
Pachlewski R. 1967. Investigations of pure culture of mycorrhizal fungi of pine (*Pin*

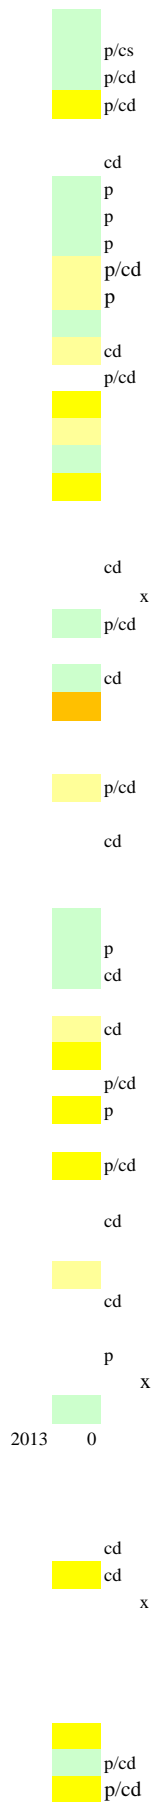

Pacioni G, Sharp C. 2000. Mackintoshia, a new sequestrate basidiomycete genus from Tasmania.

Packham JM, May TM, Brown MJ, Wardlaw TJ, Mills AK. 2002. Macrofungi in Tasmania.

Page M, Venditti C, Meade A. 2006. Large punctuational contribution of speciation to the evolution of fungi.

Page M. 1999. Inferring the historical patterns of biological evolution. Nature 401: 102-106.

Pajmans K. 1976. New Guinea vegetation. Australian National University Press, Canberra.

Paillet FL. 2002. Chestnut: history and ecology of a transformed species. J. Biogeog.

Palenzona M. 2002. Tuber brumale, T. Melanosporum, T. Rufum -stintees ja kirjeldused Eesti metsades.

Palfner G. 2002. Balsamia alba -ektendomükoriisamännil: õhuke mantel, rakusisene kloroplastid ja sporeid.

Palfner G. 2002. Leucangium carthusianum -Ecm ebatsugaal: sarn Disciotis mükoriisale; sarn Disciotis mükoriisale.

Palfner G, Canseco MI, Casati M. 2002. Nothofagus alpestris -Descolea antarctica, Cenococcum lignicola -Cortinarius, Thaxterogaster, Stephanopus, Descolea, Austroporia, Suillus spp. sünt ja kirjeld 2 männilliigil.

Palme AE, Su Q, Rautenberg A, Manni F, Lascoux M. 2003. Postglacial recolonization of Europe by Mycorrhiza 4: 93-104.

Palmer JM, Lindner D, Volk T. 2002. Castanea dentata -Russ-Lact (10), Tom-Thel (6), S. 10-11.

Palmer JM, Lindner DL, Volk T. 2002. Castanea Dentata -Taksonitest dominantsed liikid.

Palmer MW. 1992. The coexistence of species in fractal landscapes. Am. Nat. 139: 100-110.

Panaccione DG, Sheets NL, Cennamo G. 2002. Cenococcum lignicola -liigisisene.

Pandey M, Sharma J, Taylor DL, Yadon VL. 2013. A narrowly endemic photosynthetic fungus from the Himalayas.

Pantidou ME. 1962. Cultural studies of Boletaceae. Carpophores of Phlebopus lignicola.

Paolocci F, Rubini A, Riccioni C, Topini F, Arcioni S. 2004. Tuber aestivum and Tuber borchii.

Paquette A, Messier C. 2011. The effect of biodiversity on tree productivity: from temperate to tropical forests.

Paradi I, Baar J. 2006. Mycorrhizal fungi of Salix alba, ülejüü Kokku 12 liiki juurtel: Tuber 5 spp., Lactaria, Russula, Cortinarius, Thaxterogaster, Stephanopus, Descolea, Austroporia, Suillus spp. sünt ja kirjeld 2 männilliigil.

Paradis E, Claude J, Strimmer K. 2004. APE: Analyses of Phylogenetics and Evolution in R.

Pardo AG, Hanif M, Raudaskoski M, Gorfer M. 2002. Genetic transformation of ectomycorrhizal fungi.

Pardo LH, Nadelhoffer K. 2010. Using nitrogen isotope ratios to assess terrestrial ectomycorrhizal fungi.

Pardo LH, Templer PH, Goodale CL. 2006. Regional assessment of N saturation using ectomycorrhizal fungi.

Parducci L, Jorgensen T, Tollefsrud MM, Elverland E, Alm T, Fontana SL et al. 2011. Ectomycorrhizal fungi in boreal forests.

Parfitt D, Ainsworth AM, Simpson D, Rogers HJ, Boddy L. 2007. Molecular and morphological characters of ectomycorrhizal fungi.

Parfrey LW, Grant J, Tekle YI, Lasek-Nesselquist E, Morrison HG, Sogin ML, Patten B, Park J, Cheong K-C, Choi J, Jung K, Kim D, Lee Y-H, Ward TJ, O'Donnel K-H. 2009. Molecular biological study on speciation and phylogeny of the order Boletales.

Parke JL, Linderman RG, Trappe JM. 1983. Effect of root zone temperature on ectomycorrhizal fungi.

Parke JL, Linderman RG, Trappe JM. 1983. Effects of forest litter on mycorrhizal development.

Parladé J, Álvarez IF, Pera J. 2004. Ability of native ectomycorrhizal fungi from northern Spain to colonize Pinus taeda.

Parlade J, Cohen M, Doltra J, Luque J, Pera J. 2001. Continuous measurement of ectomycorrhizal fungi.

Parlade J, Luque J. 2004. Evaluation of mycelial inocula of edible Lactarius species.

Parolin P, Adis P, Rodrigues WA, Amaral I, Piedade MTF. 2004. Floristic study of ectomycorrhizal fungi.

Parolin P, De Simone O, Haase K, Waldhoff D, Rottenberger S, Kuhn U and 5 other authors. 2004. Contrasting ectomycorrhizal fungi in Pinus taeda vs. C. Kontr: Russ1, Tylosp1\*, Cort mucos.

Parrent JL, Peay K, Arnold E, Cohn LH, Avis P, Tuininga A. 2010. Moving from ectomycorrhizal fungi to endomycorrhizal fungi.

Parrent JL, Vilgalys R. 2007. EmH vs ECM: sa EmH vs ECM; vs CO2, N väet: domineerivad liikid.

Parry RA, McLean CB, Alderton MR, Coloe PJ, Lawrie AC. 2000. Polyclonal anamorphs of Tuber borchii.

Pärtel M, Kalamees R, Zobel M, Rosen E. 1998. Restoration of species-rich limestone grasslands in Estonia.

Pärtel M, Kalamees R, Zobel M, Rosen E. 1999. Alvar grasslands in Estonia: variatsioonid ja liikide rikkus.

Pärtel M, Laanisto L, Zobel M. 2007. Contrasting plant productivity-diversity relationships in grasslands.

Pärtel M, Moora M, Zobel M. 2001. Variation in species richness within and between grasslands.

Pärtel M, Zobel M. 1995. Small-scale dynamics and species richness in successional grasslands.

Pärtel M, Zobel M. 1999. Small-scale plant species richness in calcareous grassland.

Pärtel M. 2002. Local plant diversity patterns and evolutionary history at the regional scale.

Pärtel M. 2006. Data availability for macroecology: how to get more out of regular data.

Parts K, Tedersoo L, Lõhmus K, Kupper P, Rosenthal K, Sõber A, Ostonen I, 2013. Pasonen H-L, Lu J, Niskanen T. 2002. Betula pendula -FIN: vs transgeensed Chit IV ta.

Pavoine S, Bonsall MB. 2011. Measuring biodiversity to explain community assembly.

Pavoine S, Vela E, Gachet S, Belair S, Bonsall MB. 2011. Linking patterns in phylogenetic diversity.

Pawlowska TE, Taylor JW. 2004. Organization of genetic variation in individuals of ectomycorrhizal fungi.

Pawlowski J, Audic S, Adl S. 2012. CBOL Protist Working Group: barcoding eukaryotic organisms.

Pawluczky M, Weiss J, Links ME, Aranguren ME, Wilkinson MD, Egea-Cortines M, Peabody RB, Peabody DC. 1987. Haploid monokaryotic basidiocarp tissues in species-rich grasslands.

Peakall R, Ruibal M, Lindenmayer DB. 2003. Spatial autocorrelation analysis offers insights into the distribution of ectomycorrhizal fungi.

Pearson AA. 1950. Cape Agarics and Boleti. Trans. Br. Mycol. Soc. 33: 276-316.

Pease EA, Tien M. 1992. Heterogeneity and regulation of manganese peroxidases from ectomycorrhizal fungi.

Peat HJ, Clarke A, Convey P. 2007. Diversity and biogeography of the Antarctic flora.

Peay K, Garbelotto M, Brunner I. 2002. Kuumutamine Kuumutamine: Wilcoxina, Rhizoglyphus, Russula, Cortinarius, Thaxterogaster, Stephanopus, Descolea, Austroporia, Suillus spp. sünt ja kirjeld 2 männilliigil.

Peay KG, Bidartondo MI, Arnold AE. 2010. Not every fungus is everywhere: scaling up the distribution of ectomycorrhizal fungi.

Peay KG, Bruns RD. 2014. Spore dispersal of basidiomycete fungi at the landscape scale.

p/cd  
 1  
 p  
 1  
 p  
 cd  
 p/cd  
 j  
 p  
 p/cd  
 p/cd  
 p/cd  
 p/cd  
 cd  
 p  
 cd  
 p  
 p/cd  
 cd  
 cd  
 p/cd  
 p  
 p/cd  
 p/cd  
 p  
 cd  
 p/cd

x

x

Peay KG, Bruns TD, Kennec **EcM seente liigin Suillus pungens, Rhiz salebrosus, Rh**  
 Peay KG, Garbelotto M, Bruns TD. 2010. Evidence of dispersal limitation in soil mi  
 Peay KG, Kennedy PG, Bruns TD. 2008. Fungal community ecology: a hybrid beast  
 Peay KG, Kennedy PG, Dav Borneo 2 alal: kokku: Russ(30),Bol (14); Tom  
 Peay KG, Schubert MG, Nguyen NH, Bruns TD. 2012. Measuring ectomycorrhizal  
 Pechanec AA., Franklin JF. 1968. Comparison of vegetation in adjacent alder, conif  
 Pedersen CT, Sylvia DM, Shilling GS. 1999. Pisolithus arhizus ectomycorrhiza affec  
 Pegler DN, Boddy L, Ing B, Kirk PM. 1993. Fungi of Europe: Investigation, Record  
 Pegler DN, Fiard JP. 1978. Taxonomy and ecology of Lactarius( Agaricales) in the L  
 Pegler DN, Rayner RW. ??? A contribution to the Agaric flora of Kenya. **Keenias:**  
 Pegler DN. 1966. Tropical African Agaricales. Persoonia 4: 73-124.  
 Pegler DN. 1968. Studies on African Agaricales: I. Kew Bull. 21: 499-533.  
 Pegler DN. 1969. Studies on African Agaricales: II. Kew Bull. 23: 219-249.  
 Pegler DN. 1981. Agaricoid and boletoid fungi ( Basidiomycota) from Malawi and Z  
 Pegler DN. 1983. Agaric flora of the Lesser Antilles. Kew Bull. Add Ser I **Väikeste**  
 Pegler DN. 1986. Agaric Flora of Sri Lanka. HMSO: London  
 Pegler DN. 1987. A revision of the Agaricales of Cuba 1. Species described by Berc  
 Pegler DN. 1987. A revision of the Agaricales of Cuba 2. Species described by Earl  
 Pegler DN. 1988. A revision of the Agaricales of Cuba 3. Keys to families, genera a  
 Pegler DN. 1996. Agarics described from the Cape province, South Africa **Kapimaa**  
 Peintner U, Bougher NL, Castellano M-A, Moncalvo J-M, Moser MM, Trappe JM,  
 Peintner U, Horak E, Moser MM, Vilgalys R. 2002. Phylogeny of *Rozites*, *Cuphocy*  
 Peintner U, Iotti M, Klotz P, **puhas Castanea n EcM: Cenococcum, Russ rosea**, Lact  
 Peintner U, Moncalvo J-M, Vilgalys R. 2004. Toward a better understanding of the  
 Peintner U, Moser MM, Thomas A, Manimohan P. 2003. First records of ectomycor  
 Peltzer DA. 2001. Plant responses to competition and soil origin across a prairie-fore  
 Peña L, Seguin A. 2001. Recent advances in genetic transformation of trees. Trends  
 Pena R, Offermann C, Simor Koorimine-girc Cenoc, Tomentella 2tk, Lact ble  
**Pena R, Tejedor J, Zeller B, eri-seened omastavad määrgistatud varisest eri ti**  
 Pennanen T, Liski J, Baath E, Kitunen V, Uotila J, Westman CJ, Fritze H. 1999. Str  
 Pennanen T, Paavolaianen L, Hantula J. 2001: **Rapid PCR-based method for the direc**  
 Pennington HG, Bidartondo **Eucalyptus ENG: Lacc lateritia, Scleroderma sj**  
 Pennington Boletus speciosus tammela aeti taga risomorfe VKst mükoriisa  
 Pennington RT, Lavin M, Ireland H, Klitgaard B, Preston J, Hu J-M. 2001. Phyloge  
 Pennington RT, Lavin M, Oliveira-Filho A. 2009. Woody plant diversity, evolution :  
 Pennington RT, Lavin M, Prado DE, Pendry CA, Pell SK. 200X. Climate change an  
 Pennington RT, Richardson JE, Lavin M. 2006. Insights into the historical construct  
 Pennisi E. 2008. Proposal to 'Wikify' GenBank meets stiff resistance. Science 319:  
**Peplis J, Glöckner FO, Amann R. 2003. Optimization strategies for DNA microarr**  
 Pera J, Alvarez IF. 1995. Ectomycorrhizal fungi of *Pinus pinaster*. Mycorrhiza 5: 15  
 Percudani R, Trevisi A, Zambonelli A, Ottonello S. 1999. Molecular phylogeny of t  
 Pereira OL, Kasuya MCM, Borges AC, de Araujo EF. 2005. Morphological and mo  
 Peres-Neto PR, Jackson JA. 2001. How well do multivariate data sets match? The a  
**Peres-Neto PR. 2004. Patterns of the co-occurrence of fish species in streams: the re**  
 Peres-Neto R, Legendre P, Dray S, Borcard D. 2006. Variation partitioning of speci  
 Perez-Garcia EA, Meave JA. 2006. Coexistence and divergence of tropical dry fore  
 Perez-Moreno J, Read DJ. 2001. Exploitation of pollen by mycorrhizal mycelial syst  
**Perez-Moreno J, Read DJ. 2001. Nutrient transfer from soil nematodes to plants: a d**  
**Perez-Moreno J, Read, Dj. 2000. Mobilization and transfer of nutrients from litter to**  
 Perkins DN, Pappin DJC, Creasy DM, Cottrell JS. 1999. Probability-based protein i  
 Perotto S, Actis-Perino E, Perugini J, Bonfante P. 1996. Molecular diversity of fungi  
 Perotto S, Giralanda M, Martino E. 2002. Ericoid mycorrhizal fungi: some new persp  
 Perrier N, Amir H, Colin F. 2006. Occurrence of mycorrhizal symbioses in the meta  
 Perrin R, Garbaye J. 1983. Influence of ectomycorrhizae of Pythium-infested soils a  
**Perrin RM, Wigge PA. 2001. Biotic interactions. Web alert. Curr. Opin. Plant Biol.**  
 Perry BA, Hansen K, Pfister DH. 2007. A phylogenetic overview of the family Pyro  
 Perry BA, Pfister DH. 2008. Chaetothiersia vernalis, a new genus and species of Pyl  
 Perry DA, Amaranthus MP, Borchers JG, Borchers SL, Brainerd RE. 1989. Bootstr  
**Perry DA, Bell T, Amaranthus MP. 1992. Mycorrhizal fungi in mixed-species forest**  
 Perry DA, Borchers JG, Borchers SL, Amaranthus MP. 1990. Species migrations an  
**Perry DA, Margolis H, Choquette C, Molina R, Trappe JM. 1989. Ectomycorrhizal**  
**Perry DA, Molina R, Amaranthus MP. 1987. Mycorrhizae, mycorrhizospheres, and**  
 Perry DA. 1995. Self-organizing systems across scales. Trends Ecol. Evol. 10: 241-  
 Perry DA. 1998. A movable feast: the evolution of resource sharing in plant-fungus c  
 Pertea G, Huang X, Liang F, Antonescu V, Sultana R, Karamycheva S, Lee Y, Whit  
 Petchey OL, Hector A, Gaston KJ. 2004. How do different measures of functional d  
 Peter M, Ayer F, Cudlin P, **E vs surevates kuus Tylospora fibrillosa nii look Cortinari**  
 Peter M, Ayer F, Egli S, Hor **3 Shveitsi kuusiki EcM: Amphinema, Cenoc, vs ECM.**

cd  
cd  
cd  
p  
p  
p  
p  
p  
p  
p/cd  
p

p  
p/cd  
p  
p/cd

p  
p/cd  
j  
cd

p  
p  
p  
p/cd

2012 9  
p  
p/cd

cd  
cd

p  
p

p  
p  
p/cd  
cd

j  
p/cd

p/cd

p  
p

Peter M, Ay xxx vs viljakehad; vs N-väetis vs ECM

Peter M, Bü Arcangeliella borziana

Peter M, Courty P-E, Kohler A, Delaruelle C, Martin D, Tagu D, Frey-Klett P, Dupl

Petersen JE, Hastings A. 2001. Dimensional approaches to scaling experimental eco

Petersen PM. 1967. Studies on the ecology of some species of Pezizales. I Pezizales

Petersen PM. 1970. Changes in fungus flora after treatment with various ci CaCO<sub>3</sub> (

Petersen PM. 1970. Danish fireplace fungi. Dansk Botanisk Arkiv. 27.3. lökkeplat

Petersen PM. 1971. The macromycetes in a burnt forest area in Denmark. Pölenud

Petersen PM. 1975. Fireplace fungi in an arctic area: Middle West Greenl: Gröönim

Petersen PM. 1978. The phenology of some soil inhabiting Pezizales. Fries: Pezizales

Petersen R, Hughes K. 2009. Names, names, names: when nomenclature meets mole

Petersen RH, Hughes KW. 1999. Species and speciation in mushrooms. Bioscience

Petersen RH. 1987. Notes on Clavarioid Fungi. XXI. New Zealand taxa of Tremello

Petersen RH. 1988. Notes on Clavarioid Fungi. XXII. Three Interesting South Amer

Peterson RL, Ashford AE, Allaway WG. 1985. Vesicular-arbuscular mycorrhizal as

Peterson RI SLAIDID, erimükoriisatiübid. Monotropoidse mükoriisa "fungal peg" f

Peterson TA ErM: nii kottseened kui kandseened (arv Clavaria)

Petit RJ, Aguinalgalde I, de Beaulieu J-L and 14 others. 2003. Glacial refugia: hotsp

Peynorel B. 1920. Sulla normale presenza di micorize nel grano. Bol. Staz. Pat. Veg

Peyronel B. vaatas viljakehi puude all ja tegi tarka nägu

Peyronel B. 1920. Alcuni casi di rapporti micorizici tra boletinee ed essenze arboree

Peyronel B. Amanitopsis vaginata, Russula pseudofallax, laricif, montana

Peyronel B. Gomphidius, Amanita, Xerocomus, Byssocorticium, Gyroporus,

Peyronel B. Amanita, Xerocomuse, Cortinariuse, Gyroporus, Byssocortic

Peyronel B. Hydnotrya tulasnei + Larix, Suillus caviper + Larix; Russula -

Peyronel B. Cortinarius ja Russula VK viidi EcMni

Peyronel B. Cortinariuse ja Russula mütseeli jälgimine Vkdest EcMni

Pfister DH, Kimbrough JW. 2001. Discomycetes. In: McLaughlin DJ, McLaughlin I

Pfister DH, Slater C, Hansen K. 2008. Chorioactidaceae: a new family in the Pezizal

Pfister DH. Genea, Humaria, Jafneadelphuse viljakeha peridiumi rakkude morf on s

Pfunder M, Holzgang O, Frey JE. 2004. Development of microarray-based diagnosti

Pham N-DH, Yamada A, Shimizu K, Noda K, Dang L-AT, Suzuki A. 2012. A sheat

Phillipson JJ, Coutts MP. 1978. Tolerance of tree roots to waterlogging. IV. Oxygen

Phillips DL, Gregg JW. 2001. Uncertainty in source partitioning using stable isotope

Phillips DL, Koch PL. 2002. Incorporating concentration dependence instable isotope

Phillips DL. 2001. Mixing models in analyses of diet using multiple stable isotopes:

Phillips RP, Fahey TJ. 2006. Tree species and mycorrhizal associations influence the

Phillips RP, Meier IC, Bernhardt ES, Grandy AS, Wickings K, Finzi AC. 2012. Roc

Phosri C, Martin MP, Watling R, Jeppson M, Sihanonth P. 2009. Molecular phyloge

Phosri C, Pölme S, Taylor AFS, Kõljalg U, Suwannasai N, Tedersoo L. 2012. Diver

Piche Y, Ac Wilcoxina mikolae männil (P resinosa)sünteesitud: katkendlik mantel, k

Piche Y, Fo männil dihotomiseerimise vaatlemine

Pickles BJ, Genney DJ, Anderson IC, Alexander IJ. 2009. Spatial ecology of ectomy

Pickles BJ, Genney DR, Pott Pinus sylvestri: Cenococcum, Mel bic; ruumilil

Piculell BJ, Hoeksema JD, Thompson JN. 2008. Interactions of biotic and abiotic en

Piercey MM, Graham SW, Currah RS. 2004. Patterns of genetic variation in Phialoc

Piercey MM, Thormann MN, Currah RS. 2002. Saprobic characteristics of three fun

Pigott CD, Huntley JP. 1981. Factors controlling the distribution of Tilia cordata at t

Pigott CD. Cenococcum pärnal: hartigi võrgustiku rakud taimel radiaalselt pikene

Pigott CD. 1982. Survival of mycorrhiza formed by Cenococcum geophilum Fr. In d

Pilat A. 193 Albatrellus confluens VK ja EcM viidi kokku mööda myc

Pilat A. 1965. Hrib drevozijny-Pulveroboletus lignicola (Kallenbach) comb. nov. n

Pilat A. 1969. Buchwaldoboletus genus novum Boletacearum. Friesia 9: 217-218.

Pilz D, McLain R, Alexander S, Villarreal-Ruiz L, Berch S, Wurtz TL, Parks CG, M

Pilz D, Weber NS, Carter MC, Parks CG, Molina R. 2004. Productivity and diversit

Pinheiro J, Bates D, DebRoy S. 2011. nlme: Linear and Nonlinear Mixed Effects M

Pinkas Y, Maimon M, Shabi E, Elisha S, Shmulewicz Y, Freeman S. 2000. Inoculat

Piotrowski JS, Lekberg Y, Harner MJ, Ramsey PW, Rilling MC. 2008. Dynamics o

Pirotta R. A Terfezia obs EcM

Pirozynski KA, Malloch DW. 1975. The origin of land plants :a matter of mycotropl

Pirozynski KA. 1983. Pacific mycogeography: an appraisal. Aust. J. Bot. 1seeded A

Pirrung M, Kennedy R, Caporaso JG, Stombaugh J, Wendel D, Knight R. 2011. Top

Plaun V. 2004. Mechanisms and tempo of evolution in the African Guineo-Congolia

Plattner I, Hall IR. 1995. Parasitism of non-host plants by the mycorrhizal fungus Tu

Plett JM, Martin F. 2011. Blurred boundaries: lifestyle lessons from ectomycorrhizal

Plomion C et al. 1999. Developing SSCP markers in two Pinus species. Mol. Breed.

Pocock MJO, Evans DM, Memmott J. 2012. The robustness and restoration of a net



|  |        |   |                                                                                         |
|--|--------|---|-----------------------------------------------------------------------------------------|
|  |        | x | Puillandre N, Lambert A, Brouillet S, Achaz G. 2012. ABGD, Automatic Barcode            |
|  | p/cd   |   | Püttseppe Ü, Rosling A, Taylor Salix viminalis Cadophora finlandica, Cortinari          |
|  |        |   | Pyare S, Longland WS. 2002. Interrelationships among northern flying squirrels, true    |
|  | p/cd   |   | Qian H, Chen S, Mao L, Ouyang Z. 2013. Drivers of beta-diversity along latitudinal      |
|  | cd     |   | Qian H, Ricklefs R. 2004. The taxon richness and climate in angiosperms: is there a     |
|  | p/cd   |   | Qian H, Ricklefs RE. 2000. Large-scale processes and the Asian bias in species dive     |
|  | p/cd   |   | Qian H, Ricklefs RE. 2008. Global concordance in diversity patterns of vascular pla     |
|  |        |   | Qian H, Song J-S, Krestov P, Guo Q, Wu Z, Shen X, Guo X. 2003. Large-scale phy          |
|  |        |   | Qian H, Wang X, Zhang Y. 2012. Comment on 'Disentangling the drivers of beta div        |
|  | cd     |   | Qian H. 2009. Beta diversity in relation to dispersal ability for vascular plants in No |
|  | cd     |   | Qian XM, El Ashker A, Kottke I, Oberwinkler F. 1998. Studies of pathogenic and a        |
|  | cd     |   | Qian XM, K fluorestseerimine hindamaks vitaalsust                                       |
|  |        |   | Qian XM, K fluorestseerimin variabiilne ajas ja Tylospora, Russula, Tomentella sp.      |
|  | cd     |   | Qiang X, Weiss M, Kogel K-H, Schäfer P. 2012. Piriformospora indica - a mutualist       |
|  |        |   | Quackenbush J. 2002. Microarray data normalization and transformation. Nature Ge        |
|  | p/cd   |   | Queloz V, Grünig CR, Berndt R, Kowalski T, Sieber TN, Holdenrieder O. 2011. Cr          |
|  | cd     |   | Queloz V, Grünig CR, Sieber TN, Holdenrieder O. 2005. Monitoring the spatial and        |
|  | p/cd   |   | Queloz V, Sieber TN, Holdenrieder O, McDonald BA, Grünig CR. 2011. No biogeo            |
|  |        |   | Querejeta JI, Egerton-Warburton LM, Allen MF. 2003. Direct nocturnal water trans        |
|  |        |   | Querejeta JI, Egerton-Warburton LM, Allen MF. 2003. Hydraulic lift may buffer rhi       |
|  |        |   | Querejeta JI, Egerton-Warburton LM, Allen MF. 2009. Topographic position modu           |
|  | p/cd   |   | Querejeta JI, Roldan A, Albaladejo J, Mänttari, Suillus, Pisolithus, Thelephora         |
|  |        |   | Quoreshi AM, Khasa DP. 2008. Effectiveness of mycorrhizal inoculation in the nurs       |
|  |        |   | Quoreshi AM, Piche Y, Khasa DP. 2008. Field performance of conifer and hardwoo          |
|  |        |   | Quoreshi AM, Timmer VR. 1998. Exponential fertilization increases nutrient uptake       |
|  |        | x | Quoreshi M, Timmer VR. 2000. Growth, nutrient dynamics and ectomycorrhizal dev          |
|  |        |   | R Core Development Team. 2014. R: A Language and Environment for Statistical C          |
|  |        |   | Radajewski S, Ineson P, Parekh NR, Murrell JC. 2000. Stable-isotope probing as a t      |
|  | p/cd   |   | Radajewski S, McDonald IR, Murrell JC. 2003. Stable-isotope probing of nucleic ac       |
|  |        |   | Rademaker JLW, Louws FJ, de Bruijn FJ. 1998. Characterization of the diversity of       |
|  |        | x | Raes J, Letunic I, Yamada T, Jensen LJ, Bork P. 2011. Toward molecular trait-base       |
|  | n      |   | Rahbek C, Graves GR. 2001. Multiscale assessment of patterns of avian species rich      |
|  | n      |   | Raidl S, Hal Porphyrellus porphyrosporus                                                |
|  | cd     |   | Raidl S. 195 Chamoniixia caespitosa                                                     |
|  |        | x | Rains KC, Nadkarni NM, Bledsoe CS. 2003. Epiphytic and terrestrial mycorrhizas i        |
|  |        |   | Rajala T, Peltoniemi M, Hantula J, Mäkipää R, Pennanen T. 2011. RNA reveals a s         |
|  | p/cd   |   | Rajala T, Peltoniemi M, Peni lagutiüvedel: BD kasvab lagunemisastmetega; a              |
|  | p/cd   |   | Rajchenberg M. 1995. New polypores from the Nothofagus forests of Argentina. M          |
|  |        |   | Ramanankierana N, Ducouso M, Rakotoarimanga N and 7 others. Arbus. Madagas              |
|  |        |   | Ramette A, Tiedje JM. 2007. Multiscale responses of microbial life to spatial distan    |
|  | p/cd   |   | Ramette A. 2007. Multivariate analyses in microbial ecology. FEMS Microbiol. Eco        |
|  | p/cd   |   | Ramirez SR, Gravendeel B, Singer RB, Marshall CR, Pierce NE. 2007. Dating the c         |
|  | p/cd   |   | Ran J-H, Wei X-X, Wang X-Q. 2006. Molecular phylogeny and biogeography of Pi            |
|  | cd     |   | Rangel TFLVB, Diniz-Filho JAF, Bini LM. 2006. Towards an integrated computatic          |
|  | cd     |   | Ranjard L, Poly F, Lata J-C, bakterite (IGS) ja seente (ITS) ARISA=ARDRA                |
|  | p      |   | Rao AV, Tak R. 2001. Influence of mycorrhizal fungi on the growth of different tree     |
|  | j      |   | Rapior S, Andary C, Mousain D. 1987. Cortinari section Orellani: isolation and cu       |
|  | p/cd   |   | Rasanayagam S, Jeffries P. 1992. Production of acid is responsible for antibiosis by    |
|  | p      |   | Rasmussen HN, Rasmussen FN. 2009. Orchid mycorrhiza: implications of a mycop            |
|  | p      |   | Rasmussen HN, Whigham DH. 1993. Seed ecology of dust seeds in situ: a new stud          |
|  | p      |   | Rasmussen HN, Whigham DH. 1998. Importance of woody debris in seed germinati            |
|  | p/cd   |   | Rasmussen HN, Whigham DH. 1998. The underground phase: a special challenge in           |
|  |        |   | Ratkowsky DA, Gates GM. 2005. An inventory of macrofungi observed in Tasmanian          |
|  |        |   | Ratnasingham S, Hebert PDN. 2013. A DNA-based registry for all animal species: t        |
|  |        |   | Rayner ADM, Boddy L. 1988. Fungal decomposition of wood. Its biology and ecol           |
|  |        |   | Rayner ADM, Ramsdale M, Watkins ZR. 1995. Origins and significance of genetic           |
|  |        |   | Rayner MC. 1926. Tree mycorrhiza. The J. Ecol. 14: 164-167.                             |
|  | p/cd x |   | Read D, Leake JR, Perez-Moreno J. 2004. Mycorrhizal fungi as drivers of ecosyste        |
|  | p      |   | Read DJ, Armstrong W. 1972. A relationship between Oxygen transport and the for         |
|  | cd     |   | Read DJ, Duckett JG, Francis R, Ligrone R, Russell A. 2000. Symbiotic fungal asso       |
|  |        |   | Read DJ, H Cenococcum: Kobresia, Polygonum, Dryas, Helianthemum                         |
|  |        |   | Read DJ, K Cenococcum: H AM vs ECM: Helianthemum                                        |
|  | cd     |   | Read DJ, Perez-Moreno J. 2003. Mycorrhizas and nutrient cycling in ecosystems – i       |
|  | p      |   | Read DJ. 15 Ericales: erikoidne, arbutoidne, monotropoidne MR. Pyrolatel mantli olk     |
|  | p      |   | Read DJ. 1989. Mycorrhizas and nutrient cycling in sand dune ecosystems. Proc. R        |
|  | B      |   | Read J, Brown MJ. 1996. Ecology of Australian Nothofagus forests. In: Veblen TT,        |
|  | p      |   | Read J, Hill RS. 1988. The dynamics of some rainforest associations in Tasmania. J.     |
|  |        |   | Read J, Hill RS. 1995. Photosynthetic responses to light of Australian and Chilean s    |



p/cd  
 p  
 p/cd  
 p  
 p/cd  
 p  
 p  
 p  
 p/cd  
 cd  
 cd  
 cd  
 p/cd  
 p/cd  
  
 cd  
 p  
  
 cd  
 cd  
  
 cd  
  
 x  
  
 x  
  
 j  
  
 p  
 p/cd  
  
 p/cd  
 p/cd  
 p/cd  
  
 p  
  
 p/j  
 p/cd  
 p/cd  
 p/cd  
  
 p/cd  
 p/cd  
 p/cd  
 p/cd  
 p/cd  
 p/cd  
 p/cd  
 p/cd  
 cd  
  
 p/cd

Read J, Jaffre T, Hope GS, Veillon J-M. 2000. Structural and floristic characteristics of the mycorrhizal community in the French Alps. *Journal of Ecology* 88: 1011-1021.

Readhead SA, Ammirati JF, Walker GR, Norvell LL, Puccio MB. 1994. Squamantite: a new mycorrhizal type from the Yukon. *Canadian Journal of Botany* 72: 1011-1018.

Reche I, Pulido-Villena E, M. **bakterite BD** suurem suuremates Hisp mägijärvedes; lii **Reddell P**, Bowen GD, Robson AD. 1986. Nodulation of Casuarinaceae in relation to mycorrhizal fungi. *Plant and Soil* 97: 131-138.

Reddell P, Gordon V, Hopkins MS. 1999. Ectomycorrhizas in *Eucalyptus* **Põhja-Ameerika**. *Canadian Journal of Botany* 77: 1011-1018.

Reddell P, Hopkins MS, Graham AW. 1996. Functional association between apogonid mycorrhizae and Casuarinaceae. *Plant and Soil* 181: 131-138.

Reddell P, Malajczuk N. 1984. Formation of mycorrhizae by jarrah (*Eucalyptus marginata*) in the presence of ectomycorrhizal fungi. *Plant and Soil* 81: 131-138.

Reddell P, **Acacia EcM ei** tek Hartigi võrgustikku, eukaliptiil tihti ektendoMR; Ery **Reddell P**, Spain AV. 1991. Earthworms as vectors of viable propagules of mycorrhizal fungi. *Plant and Soil* 131: 131-138.

Reddell P, Yun Y, Shipton WA. 1997. Cluster roots and mycorrhizae in *Casuarina* **Reddy MS**, Natarajan K. 1997. Coinoculation efficacy of ectomycorrhizal fungi on *Larix laricina*. *Plant and Soil* 191: 131-138.

Redecker D, Kodner R, Graham LE. 2000. Glomeralean fungi from the Ordovician. *Science* 287: 131-138.

Redecker D, Morton JB, Bruns TD. 2000. Ancestral lineages of arbuscular mycorrhizal fungi. *Plant and Soil* 221: 131-138.

Redecker D, Raab P, Oehl F, Camacho FJ, Courtecuisse R. 2007. A novel clade of *Glomeromycota*. *Plant and Soil* 301: 131-138.

Redecker D, Raab P. 2006. Phylogeny of the Glomeromycota (arbuscular mycorrhizal fungi). *Plant and Soil* 281: 131-138.

Redecker D, Schüssler A, Stockinger H, Stürmer SL, Morton JB, Walker C. 2013. *Glomeromycota* **Redecker D, Szaro TM, Bowman RJ, Bruns TD**. 2001. Small genets of *Lactarius xanthosporus* in a temperate forest. *Plant and Soil* 231: 131-138.

Redecker D. 2002. Molecular identification and phylogeny of arbuscular mycorrhizal fungi. *Plant and Soil* 241: 131-138.

**Redford AJ**, Bowers RM, Knight R, Linhart Y, Fierer N. 2010. The ecology of the *Glomeromycota*. *Plant and Soil* 331: 131-138.

Redhead JF. 1968. Mycorrhizal associations in some Nigerian forest trees. *Transactions of the Botanical Society of Edinburgh* 10: 131-138.

Redhead S, Malloch DW. 1985. The genus *Phaeocollybia* (Agaricales) in eastern Canada. *Canadian Journal of Botany* 63: 63-67.

Redhead S. 1989. A biogeographical overview of the Canadian mushroom flora. *Canadian Journal of Botany* 67: 131-138.

Redhead SA, Smith JD. 1981. A North American isolate of *Coprinus kubickae* associated with *Pinus strobus*. *Canadian Journal of Botany* 59: 131-138.

Redhead SA. 1979. Mycological observations: 1, on *Cristulariella*; 2, on *Valdensin*. *Canadian Journal of Botany* 57: 131-138.

Redhead SA. 1981. Parasitism of bryophytes by agarics. *Canadian Journal of Botany* 59: 63-67.

Redman RS, Dunigan DD, Rodriguez RJ. 2001. Fungal symbiosis from mutualism to parasitism. *Plant and Soil* 231: 131-138.

Redman RS, Sheehan KB, Stout RG, Rodriguez RJ, Henson JM. 2002. Thermotolerant mycorrhizal fungi. *Plant and Soil* 241: 131-138.

Reeb V, Lutzoni F, Roux C. 2004. Contribution of RPB2 to multilocus phylogenetic analysis of *Glomeromycota*. *Plant and Soil* 261: 131-138.

Rees M. 1880. Über den Parasitismus von *Elaphomyces granulatus*. *Botanische Zeitschrift* 38: 131-138.

Reeves C, de Wit M. 2000. Making ends meet in Gondwana: retracing the transformation of mycorrhizal symbioses. *Plant and Soil* 221: 131-138.

Rehner SA, Buckley E. 2005. A *Beauveria* phylogeny inferred from nuclear ITS and *act1* DNA sequences. *Plant and Soil* 271: 131-138.

Reich M, Kohler A, Martin F, Buée L. 2009. Development and validation of an oligonucleotide probe for the identification of *Glomeromycota*. *Plant and Soil* 261: 131-138.

Reich PB, Oleksyn J, Modrzyński J, Mrozinski P, Hobbie SE, Eissenstat DM, Choler P, Reich PB, Tilman D, Isbell F, Mueller K, Hobbie SE, Flynn DFB, Eisenhauer N. 2020. The evolution of mycorrhizal symbioses. *Plant and Soil* 431: 131-138.

Reich PB, Tjoelker MG, Walters MB, Vanderklein DW, Buschena C. 1998. Close relationships between mycorrhizal fungi and their host plants. *Plant and Soil* 201: 131-138.

Reid DA. 1975. Type studies of the larger Basidiomycetes described from *Kapima*. *Canadian Journal of Botany* 53: 131-138.

Reid DA. 1975. Type studies of the larger Basidiomycetes described from Southern California. *Canadian Journal of Botany* 53: 131-138.

Reid ID. 1995. Biodegradation of lignin. *Canadian Journal of Botany* 73: S1011-S1018.

Reid CPP. 1971. Transport of C14-labeled Substances in Mycelial Strands of *Thelephora terrestris*. *Canadian Journal of Botany* 49: 131-138.

Reinhart KO, Tytgat T, van der Putten WH, Clay K. 2010. Virulence of soil-borne pathogens to mycorrhizal fungi. *Plant and Soil* 331: 131-138.

Reinhart KO, Wilson GWT, Rinella MJ. 2012. Predicting plant responses to mycorrhizal fungi. *Plant and Soil* 351: 131-138.

Reinsvold RT, Reeves B. 1986. The mycorrhizae of *Juniperus osteosperma*: Identity and function. *Plant and Soil* 101: 131-138.

**Remigi P**, Faye A, Kane A, Deruaz M, Thioulouse J, Cissoko M, Prin Y, Galiana A, Renker C, Otto P, Schneider K, Zimdars B, Maraun M, Buscot F. 2005. Oribatid mites and mycorrhizal fungi. *Plant and Soil* 271: 131-138.

Renner SS, Foreman DB, Murray D. 2000. Timing of transantarctic disjunctions in the *Pinus* genus. *Plant and Soil* 221: 131-138.

Renner SS. 2004. Plant dispersal across the tropical Atlantic by wind and sea currents. *Plant and Soil* 261: 131-138.

Renner SS. 2005. Relaxed molecular clocks for dating historical plant dispersal events. *Plant and Soil* 271: 131-138.

Reshef DN, Reshef YA, Finucane HK, Crossman SR, McVean G, Turnbaugh PJ, Lander ES, Loh P, Feuk Y, Del Pilar Ortega MEX, Pinus mcDomin, Amphinema sp., rühmad **Reynolds HL**, Hungate BA, Chapin III SF, D'Antonio CM. 1997. Soil heterogeneity and mycorrhizal fungi. *Plant and Soil* 191: 131-138.

Rezende EL, Jordano P, Bascompte J. 2007. Effects of phenotypic complementarity on mycorrhizal networks. *Plant and Soil* 301: 131-138.

Rezende EL, Lavabre J, Guimaraes PR, Jordano P, Bascompte J. 2007. Non-random assembly of mycorrhizal networks. *Plant and Soil* 301: 131-138.

Rice AV, Currah RS. 2002. New perspectives on the niche and holomorph of the mycorrhizal fungus *Mycelium radicans atrovirens*. *Plant and Soil* 241: 131-138.

Richard C, Fortin J-A. 1973. The identification of *Mycelium radicans atrovirens* (Phaeoglossum) in the field. *Canadian Journal of Botany* 51: 131-138.

Richard F, Millot S, Gardes M. 2004. Diversity and fruiting of *Quercus tammii* in Corsica. *Plant and Soil* 261: 131-138.

Richard F, Moreau P-A, Selosse M-A, Gardes M. 2004. Diversity and fruiting of *Quercus tammii* in Corsica. *Plant and Soil* 261: 131-138.

Richard F, Roy M, Shahin O. *Quercus ilex* Fr. tom-thel; kooslust mõj nõrgalt rühmad **Richardson DM**, Allsopp N, D'Antonio C, Milton SJ, Rejmanek M. 2000. Plant invasions: lessons for conservation. *Plant and Soil* 221: 131-138.

Richardson DM, Pysek P, Rejmanek M, Barbour MG, Panetta FD, West CJ. 2000. Biological invasions and ecosystem services: toward an evolutionarily informed conservation. *Plant and Soil* 221: 131-138.

Richardson DM, Rejmanek M. 2004. Conifers as invasive aliens: a global survey and analysis. *Plant and Soil* 261: 131-138.

Richardson DM, van Wilgen BW. 2004. Invasive alien plants in South Africa: how to manage them. *Plant and Soil* 261: 131-138.

Richardson DM. 1997. Forestry trees as invasive aliens. *Conservation Biology* 12: 18-26.

Richardson JE, Fay MF, Cronk QCB, Bowman D, Chase MW. 2000. A phylogenetic approach to the identification of mycorrhizal fungi. *Plant and Soil* 221: 131-138.

Richardson JML, Richards RH. 2008. A randomisation program to compare species diversity. *Plant and Soil* 301: 131-138.

Richter DL, Bruhn JN. 1989. Field survival of containerized red and jack pine seedlings. *Plant and Soil* 111: 131-138.

Richter DL, **Boletus parasiticus!!!**, Astraeus, Scleroderma spp, Thelephora stünt. Ja k **Richter DL**, Zuellig TR, Bagley ST, Bruhn JN. 1989. Effect of red pine (*Pinus resinosa*) on mycorrhizal fungi. *Plant and Soil* 111: 131-138.

Ricklefs RE, Bermingham E. 2002. The concept of taxon cycle in biogeography. *Geography* 76: 131-138.

 p  
 p/cd  
 p  
 p  
  
 p  
  
 p  
  
 cd  
 p/cd  
 B  
   
   
  
 p/cd  
  
 p  
 p/cd  
 p/cd  
 b  
 p/cd  
 p  
  
 p  
  
 p  
  
   
  
 p/cd  
 p  
   
  
 cd  
  
 (cd)  
  
 cd  
  
 p/cd  
 cd  
  
 p  
 p  
 p/cd  
  
2013      2  
 p/cd  
 p/cd

Ricklefs RE, Renner SE. 1994. Species richness within families of flowering plants. *Ecology* 75: 1443-1451.

Ricklefs RE, Schluter D. 1993. Species diversity: Regional and historical perspectives. *Ecology* 74: 1716-1730.

Ricklefs RE. 2004. A comprehensive framework for global patterns in biodiversity. *Ecol Monogr* 74: 171-195.

Ricklefs RE. 2006. Evolutionary diversification and the origin of the diversity-environment relationship. *Ecol Monogr* 76: 103-120.

Ridgway KP, Marland LA, Frankia EJ. 1993. Limacella macrospora Stevenson and L. Wheroparaonea, a new species of the genus Limacella. *Phytopathology* 83: 1167-1171.

Riess K, Oberwinkler F, Bauer R, Garnica S. 2013. High genetic diversity at the regional scale in the genus Limacella. *Phytopathology* 103: 1167-1171.

Rietkerk M, Ketner P, Wilde de JJFE. 1995. Caesalpinioideae and the study of forest structure. *Phytopathology* 85: 1167-1171.

Riffle JW, Tinus RW. 1982. Ectomycorrhizal characteristics, growth, and survival of Pinus strobus L. *Phytopathology* 72: 1167-1171.

Riffle JW. 1971. Effect of Nematodes on Root-Inhabiting Fungi. In: Hacskaýlo E (ed) *Phytopathology* 61: 1167-1171.

Rigou L, Mignard E, Plassard C, Arvieu JC, Remy JC. 1995. Influence of ectomycorrhizal fungi on the growth and survival of Pinus sylvestris L. *Phytopathology* 85: 1167-1171.

Riley R, Salamov AA, Brown DW, Nagy LG, Floudas D, Held BW et al. 2014. Extensive diversity of ectomycorrhizal fungi in a temperate forest. *Phytopathology* 104: 1167-1171.

Rillig MC, Maestre FT, Lamit LJ. 2003. Microsite differences in fungal hyphal length and biomass in a semiarid grassland. *Phytopathology* 93: 1167-1171.

Rillig MC, Mummey DL. 2006. Mycorrhizas and soil structure. *New Phytol* 171: 415-428.

Rillig MC, Treseder KK, Allen MF. 2002. Global Change and Mycorrhizal Fungi. In: *Global Change and Mycorrhizal Fungi*.

Rinaldi AC, Comandini O, Kuyper TW. 2008. Ectomycorrhizal fungal diversity: separation of Pinus halepensis and Pinus pinaster. *Phytopathology* 98: 1167-1171.

Rincon A, Alvarez IF, Pera J. 2001. Inoculation of containerized Pinus pinea L. seedlings with ectomycorrhizal fungi. *Phytopathology* 91: 1167-1171.

Rincon A, de Felipe MR, Fernandez-Pascual M. 2007. Inoculation of Pinus halepensis L. seedlings with ectomycorrhizal fungi. *Phytopathology* 97: 1167-1171.

Rincon A, Pueyo JJ. 2010. Ectomycorrhizal fungi of Pinus ESP, vs. Wilcoxina, Rhiz. Lut. Tom sp. *Phytopathology* 100: 1167-1171.

Rineau F, Courty P-E, Uroz S, Buee M, Garbaye J. 2008. Simple microplate assays for the detection of ectomycorrhizal fungi. *Phytopathology* 98: 1167-1171.

Rineau F, Courty P-E. 2011. Secreted enzymatic activities of ectomycorrhizal fungi and their role in the development of the ectomycorrhizal symbiosis. *Phytopathology* 101: 1167-1171.

Rineau F, Shah F, Smits MM, Persson P, Johansson T, Carleer R, Troein C, Tunlid P, Riviere T, Diabaté M, Ducot L, Lõuna Guineas eri peremeestaimede all (Uap Lõuna Guinea Caesalp-metsad do India ja Lõuna Guinea). *Phytopathology* 102: 1167-1171.

Riviere T, Natarajan K, Dreyfus B. 2006. Spatial distribution of ectomycorrhizal basidiomycetes in a tropical forest. *Phytopathology* 96: 1167-1171.

Rizzo DM. 2005. Exotic species and fungi: interactions with fungal, plant, and animal hosts. *Phytopathology* 95: 1167-1171.

Roalson EH, Columbus T, Friar E. 2001. Phylogenetic relationships in Caricaceae (Cyperaceae). *Phytopathology* 91: 1167-1171.

Roberts P. 1998. Ceratobasidium obscurum: an atypical Thanatephorus species, misidentified as Ceratobasidium. *Phytopathology* 88: 1167-1171.

Roberts P. 1999. Clavarioid fungi from Korup National Park, Cameroon. *Kew Bull* 54: 1167-1171.

Roberts P. 2000. Corticioid fungi from Korup National Park, Cameroon. *Kew Bull* 55: 1167-1171.

Roberts P. 2001. Amphinema angustispora: a new corticioid fungus from the Conser. *Phytopathology* 91: 1167-1171.

Roberts P. 2001. Heterobasidiomycetes from Korup National Park, Cameroon. *Kew Bull* 56: 1167-1171.

Robertson I. 1987. Pyrola: puudub : Pyrola hysteraangium, Cenococcum mit polnd. *Phytopathology* 77: 1167-1171.

Robertson GP. 1987. Geostatistics in ecology: interpolating with known variance. *Ecology* 68: 1167-1171.

Robertson NF. 1953. Studies on the mycorrhiza of Pinus sylvestris I. The pattern of mycorrhizal development. *Phytopathology* 43: 1167-1171.

Robertson SJ, Tackaberry LI. 1987. Picea mariana niiskus ja taimekoosluste gradiendil: liig. *Phytopathology* 77: 1167-1171.

Robeson MS, King AJ, Freeman KR, Birky WC, Martin AP, Schmidt SK. 2011. Soil microbial communities in a boreal forest. *Phytopathology* 101: 1167-1171.

Robinson CH. 2001. Cold adaptation in Arctic and Antarctic fungi. *New Phytol* 151: 1167-1171.

Robinson D, Fitter A. 1999. The magnitude and control of carbon transfer between plants and fungi. *Phytopathology* 89: 1167-1171.

Robinson D. 2001. Delta15N as an integrator of the nitrogen cycle. *Trends Ecol. Evol.* 16: 1167-1171.

Robinson RM, Bougher NL. 2003. The response of fungi to fire in Jarrah (põlendik). *Phytopathology* 93: 1167-1171.

Robinson RM, Mellican AE, Smith RH. 2008. Epigeous macrofungal success in a fire-killed forest. *Phytopathology* 98: 1167-1171.

Robinson RM, Tunsell VL. 2007. A list of macrofungi recorded in burnt at Cortina. *Phytopathology* 97: 1167-1171.

Rochet J, Moreau P-A, Manzi S, Gardes M. 2011. Comparative phylogenies and host specificity of ectomycorrhizal fungi. *Phytopathology* 101: 1167-1171.

Rodrigues da Silva NR, Cristina da Silva M, Fonseca Genevois V, Esteves AM, de Lencastre A, Colard A, Angelard C, Sanders IR. 2013. Relatedness among arbuscular mycorrhizal fungi in a tropical forest. *Phytopathology* 103: 1167-1171.

Romantschuk M, Sarand I, Petänen T, Peltola R, Jonsson-Vihanne M, Koivula T, Yli-Hakuri E. 2011. The diversity of ectomycorrhizal fungi in a boreal forest. *Phytopathology* 101: 1167-1171.

Romell L-G. 1921. Parallelvorkommen gewisser boleten und nadelbäume. *Svensk Bot. Tidskr.* 16: 1167-1171.

Romell L-G. 1930. Blodriskan, en granens följesvamp. *Svensk Bot. Tidskr.* 24: 524-528.

Romell L-G. 1938. A trenching experiment in spruce forest and its bearing on the problem of mycorrhizal symbiosis. *Ecology* 19: 1167-1171.

Romell L-G. 1939. The ecological problem of mycotrophy. *Ecology* 20: 163-167.

Ronquist F, Huelsenbeck JP. 2003. MrBayes 3: Bayesian phylogenetic inference using Markov chain Monte Carlo simulation. *Bioinformatics* 19: 1167-1171.

Ronquist F, Teslenko M, van der Mark P, Ayres D, Darling AD, Höhna S, Larget B, Liu S, Phillips S, van der Oost F, et al. 2012. MrBayes 3.2: efficient Bayesian phylogenetic inference and model choice across a wide range of nucleic acid sequences. *Phytopathology* 102: 1167-1171.

Rooney AP, Ward TJ. 2005. Evolution of a large ribosomal RNA multigene family: implications for the evolution of the genus. *Phytopathology* 95: 1167-1171.

Roose-Amsaleg C, Byrgoo Y. 2005. Kottseened troopikas termidikuhiilates vs nullas: kõrgemad ja madalamad. *Phytopathology* 95: 1167-1171.

Roper M, Pepper RE, Brenner MP, Pringle A. 2008. Explosively launched spores of the fungus. *Phytopathology* 98: 1167-1171.

Rosado SCS, Kropp BR, Piche Y. 1994. Genetics of ectomycorrhizal symbiosis. I. *Phytopathology* 84: 1167-1171.

Rosado SCS, Kropp BR, Piche Y. 1994. Genetics of ectomycorrhizal symbiosis. II. *Phytopathology* 84: 1167-1171.

Rose SL, Perry DA, Pilz D, Schoeneberger MM. 1983. Allelopathic effects of litter on ectomycorrhizal fungi. *Phytopathology* 73: 1167-1171.

Rose SL. 1980. Mycorrhizal associations of some actinomycete nodulated nitrogen-fixing plants. *Phytopathology* 70: 1167-1171.

Rosendahl S. 2008. Communities, populations and individuals of arbuscular mycorrhizal fungi in a boreal forest. *Phytopathology* 98: 1167-1171.

Rosenthal K, Ostonen I, Uri V, Varik M, Tedersoo L, Lõhmus K. 2013. Tree age and ectomycorrhizal diversity in a boreal forest. *Phytopathology* 103: 1167-1171.

Roshan U, Livesay DR. 2006. Probalign: multiple sequence alignment using partitioned

cd  
cd  
cd  
cd  
cd  
p/cd  
cd  
p/cd  
cd  
cd  
cd  
cd  
cd  
p/cd  
cd  
1  
p/cd  
p/cd  
p  
p/cd  
p/cd  
j  
cd  
cd  
j  
p  
p/cd  
p/cd  
p/cd  
cd  
p/cd  
cd  
cd  
cd  
cd

1

Rosling A, Cox F, Cruz-Martinez, Ihrmark K, Grelet G-A, Lindahl BD, Menkis A, J Rosling A, Landeweert R, Li männikus, sügavi **Piloderma reticulatum**; **Suillus luteus**  
Rosling A, Lindahl BD, Finlay RD. 2004. Carbon allocation to ectomycorrhizal root  
**Rosling A, Lindahl BD, Taylor AFS, Finlay RD. 2003. Mycelial growth and substrate**  
**Roth-Bejerano N, Li Y-F, Kagan-Zur V. 2004. Homokaryotic and heterokaryotic hy**  
Roux C, Sejalon-Delmas N, Martins M, Parguey-Leduc A, Dargent R, Becard G. 15  
Roxburgh SH et al. 2004. THE INTERMEDIATE DISTURBANCE HYPOTHESIS  
**Roy M, Dubois M-P, Proffit M, Vincenot L, Desmarais E, Selloso M-A. 2008. Evid**  
Roy M, Wathana S, Stier A, Richard F, Vessabutr S, Selloso M-A. 2009. Mycohet  
Roy M, Yagame T, Yamato M, Iwase K, Heinz C, Faccio A, Bonfante P, Selloso M  
Roy S, Khasa DP, Greer CW. 2007. Combining alders, frankiae, and mycorrhizae f  
**Rubina A, Topini F, Riccioni C, Paolucci F, Arcioni S. 2004. Isolation and character**  
**Rubini A, Belfiori B, Passeri V, Baciarelli Falini L, Arcioni S, Riccioni C, Paolucci l**  
**Rubini A, Belfiori B, Riccioni C, Arcioni S, Martin F, Paolucci F. 2011. Tuber melar**  
**Rudawska M, Leski T, Troel kuusel metsataim Sagedasimad Wilcoxina mikolae, eri**  
**Rudawska ML, Kieliszewska-Rokicka B. 1997. Mycorrhizal formation by Paxillus i**  
**Rudi K, Skulberg OM, Skulberg R, Jakobsen KS. 2000. Application of sequence-sp**  
**Ruess L, Tiunov A, Haubert D, Richnow HH, Häggblom MM, Scheu S. 2005. Carb**  
**Rühm W, Kammerer L, Hier 137Cs/134Cs erinevus mullas näitab seente müteeli p**  
**Rull V. 2005. Biotic diversification in the Guayana highlands: a proposal. J. Biogeog**  
**Rumberger MD, Münzenber, mitmes vanuses p männil eripaigus: Russula ochroleuca**  
**Rungjindamai N, Sakayaroj J, Plaingam N, Somrithipol S, Jones EBG. 2008. Putativ**  
**Ruonion GB, Mitchell RJ, Ro polnud oluline**  
**Ruosalainen AL, Väre H, Vestberg M. 2002. Seasonality of root fungal colonizatio**  
**Rusca TA, Kennedy PG, Bru eri männiliikidel Rhizopogon: mõnel idaneb rohkem lii**  
**Rusch G, Fernandez-Palacios JM. 1995. The influence of spatial heterogeneity on re**  
**Russell AJ, Bidartondo MI, Butterfield BG. 2002. The root nodules of the Podocarp**  
**Russo RO. 2005. Nitrogen-fixing trees with actinorhiza in forestry and agroforestry.**  
**Rust J, Singh H, Rana RS, McCann T, Singh L, Anderson K, Sarkar N, Nascimbene**  
**Ruzicka J, Hansen EH. 1981. Flow injection analysis. New York, NY, USA: Wiley**  
**Ryberg M, Andreassen M, Björk RG. 2010. Weak habitat specificity in ectomycorri**  
**Ryberg M, Kristiansson E, Sjökvist E, Nilsson Geenipank: anoteerimata: Tom**  
**Ryberg M, Larsson E, Jacobsson S. 2010. An evolutionary perspective on morpholo**  
**Ryberg M, Larsson E, Molat Dryas octopeta Cenoc; Tom-thel, Seb (sh 2 har**  
**Ryberg M, Matheny PB. 2011. Dealing with incomplete taxon sampling and diversif**  
**Ryberg M, Matheny PB. 2012. Asynchronous origins of ectomycorrhizal clades of /**  
**Ryberg M, Nilsson RH, Kristiansson E, Töpel M, Jacobsson S, Larsson E. 2008. M**  
**Rydin C, Raunsgaard Pedersen K, Friis EM. 2004. On the evolutionary history of E**  
**Rygielwicz PT, Johnson MG, Ganio LM, Tingey DT, Storm MJ. 1997. Lifetime and**  
**Ryser P. 1993. Influences of neighbouring plants on seedling establishment in lime:**  
**Ryvarden L, Johansen I. 1980. A preliminary polypore flora of East Africa Coltricia**  
**Saari SK, Campbell CD, Rus männi eri isendite Russula dimeia, Suillus flavidus, unk**  
**Saavedra S, Stouffer DM, Uzzi B, Bascompte J. 2011. Strong contributors to netwo**  
**Sagara N, Ooyama J, Koyama M. 2008. New casual animal for the growth of Hebel**  
**Sagara N. 1995. Association of ectomycorrhizal fungi with decomposed ar Hebelom**  
**Saikkonen I mega mänd; vs okaste okaste rookides asendusid risomorfir**  
**Saikkonen K, Wäli P, Helander M, Faeth SH. 2004. Evolution of endophyte-plant s**  
**Sait M, Hugenholtz P, Janssen PH. 2002. Cultivation of globally distributed soil bac**  
**Sakakibara vs RFLP: kattusid enamasti kergelt tuntavate liikide puhul, ent ei eristan**  
**Salo K. 1979. Mushrooms and mushroom yield on transitional peatlands ir eri sooko**  
**Salonen V, Setälä H, Puustinen S. 2000. The interplay between Pinus sylvestris, its i**  
**Salonen V, Vestberg M, Vauhkonen M. 2001. The effect of host mycorrhizal status**  
**Saltonstall K. 2001. A set of primers for amplifying noncoding regions of chloroplas**  
**Sampo S, Bergero R, Buffa (mikroseened mullas Alnus all: tamede vanus (a**  
**Samson J, F Suilluse ja Boletinuse sünt. EcM Larix laricina**  
**Samuel R et al. 2005. Molecular phylogenetics of Phyllanthaceae:.. Am. J. Bot. 92: :**  
**Sanchez A, Kron KA. 2008. Phylogenetics of Polygonaceae with an emphasis on the**  
**Sanchez F, Honrubia M, Torres P. 2001. Effects of pH, water stress and temperatur**  
**Sanchez Marquez S, Bills GF, Dominguez Acuna L, Zabalgoitia I. 2010. Endog**  
**Sanders IR, Croll D. 2010. Arbuscular mycorrhiza: the challenge to understand the g**  
**Sanders IR. 2004. Plant and AM BD uurimiseks sobib paremini molekulaarne vs eo**  
**Sanderson MJ, Doyle JA. 2001. Sources of error and confidence intervals in estimat**  
**Sanderson MJ, Driskell AC. 2003. The challenge of constructing large phylogenetic**  
**Sanderson MJ, Shaffer HB. 2002. Troubleshooting molecular phylogeny analyses. A**  
**Sanderson MJ. 2002. Estimating absolute rates of molecular evolution and divergen**  
**Sandhu GS, Kline BC, Stockman L, Roberts GD. 1995. Molecular probes for diagn**  
**Sang T, Crawford DJ, Stuessy TF. 1997. Chloroplast DNA phylogeny, reticulate ev**

cd  
p/cd  
p/cd  
p/cd  
cd  
p/cd

cd

p/cd

p/cd

cd

cd

p

p/cd

cd

cd  
cd

4

p/cd

cd  
cd

cd

x

x

p  
p/cd

cd  
p/cd

cd

p/cd  
p/cd

p  
cd

cd

p

p

Sangtjean T, Schmidt S. 2002. Growth of subtropical ECM fungi with different nitro  
Sanmartin I, Enghoff H, Ronquist F. 2001. Patterns of animal dispersal, vicariance a  
Sanmartin I, Mark P, Ronquist F. 2008. Inferring dispersal: a Bayesian approach to j  
Sanmartin I, Ronquist F. 2004. Southern Hemisphere biogeography inferred by even  
Sanon KB, Ba AM, Delaruelle C, Duponnois R, Martin F. 2009. Morphological and  
Sanon KB, Ba AM, Dexheimer J. 1997. Mycorrhizal status of some fungi Burkina  
Sapp J. 2004. The dynamics of symbiosis: an historical overview. Can. J. Bot. 82: 10  
Sappa F. 1940. Ricerche biologiche *Tuber magnatum* Pico. Nuovo Gior. Bot. Ital. 4  
Sarand I, Haario H, Jorgensen K, Romantschuk M. 2000. Effect of inoculation of a  
Sarand I, Timonen S, Nurmiaho-Lassila E-L, Koivula T, Haahela K, Romantschuk I  
Saravesi K, Markkola A, Rautio P, Roitto M, Tuomi J. 2008. Defoliation causes par  
SAS Institute. 1989–1999. JMP. SAS Institute, Inc., Cary, North Carolina, USA.  
Sati SC, Belwal M. 2005. Aquatic hyphomycetes as endophytes of riparian plant roc  
Sato H, Morimoto S, Hattori T. 2012. A thirty-year survey reveals that ecc saproob  
Sato H, Murakami N. 2008. Reproductive isolation among cryptic species in the ect  
Sato H, Tsujino R, Kurita K, Yokoyama K, Agata K. 2012. Modelling the global dis  
Sato H, Yumoto T, Murakami N. 2007. Cryptic species and host specificity in the ec  
Savage JA. 2010. An ecological and evolutionary perspective on functional diversity  
Savoie J-M, Largeteau ML. 2011. Production of edible mushrooms in forests: trends  
Savolainen V et al. 2000. Phylogenetics of flowering plants based on combined anal  
Savolainen V et al. 2000. Phylogeny of the eudicots: a nearly complete familial anal  
Savolainen V, Cuenoud P, Spichiger R, Martinez MDP, Crevecoeur M, Manen JF, I  
Savolainen V, Manen JF, Douzery E, Spichiger R. 1994. Molecular phylogeny of fa  
Sawyer NA, Chambers SM, Cairney JWG. 1999. Molecular investigation Cortinari  
Sawyer NA, Chambers SM, Cairney JWG. 2001. Distribution and persistence A. musca  
Sbissi I, Neffati M, Boudabous A, Murat C, Gtari M. 2010. Phylogenetic affiliation  
Scales PF, I Wilcoxina mikolae ECM kuusel (P mariana) ja kasel (B alleghaniensis)  
Scanlan PD, Marchesi JR. 20 mikroseente ja teiste mikroeuکاریootide mitme  
Scattolin L, Alzetta C, Bolz Tilia cordata Padovas (ITA): kahjustuse klassid  
Scattolin L, dal Maso E, Mu ITA Castanea s Phytophthora: EcM kooslused e  
Scattolin L, Lancellotti C, Fr Sardiinia, Quercus ilex: vs altituud: mõjutab kc  
Scattolin L, Montecchio L, N Sügavuti ekspl OF: Cenoc, Sarcodon imbic, Ar  
Scattolin L. 2006. Variations of the ectomycorrhizal community in high mountain N  
Schabereiter-Gurtner C, Pina mikroseened vanal klaasivärvil: Pleosporales, Onygena  
Schadt CW, Martin AP, Lips uued kottseente harud tundramullas. Märgatavad erinev  
Schadt CW, Mullen RB, Schmidt SK. 2001. Isolation and phylogenetic identification  
Schadt CW, Rosling A. 2015. Global diversity and geography of soil fungi: minus at  
Schaefer I, Norton RA, Scheu S, Maraun M. 2010. Arthropod colonization of land -  
Schardl CL, Craven KD, Speakman S, Stromberg A, Lindstrom A, Yoshida R. 2008  
Schardl CL, Craven KD. 2003. Interspecific hybridization in plant-associated fungi  
Schardl CL, Leuchtman A, Chung K-R, Penny D, Siegel MR. 1997. Coevolution b  
Schatz B, Geoffroy A, Dainat B, Bessiére J-M, Buatois B, Hossaert-McKey M, Sel  
Schelkle M, Peterson RL. 1996. Suppression of common root pathogens by helper b  
Schemske DW, Mittelbach GG, Cornell HV, Sobel JM, Roy K. 2009. Is There a lat  
Scherber C, Eisenhauer N, Weisser WW, Schmid B, Voigt W, Fischer M and 34 ot  
Scherer-Lorenzen M, Potvin C, Koricheva J, Schmid B, Hector A, Bornik Z, Reynol  
Scheu S, Fa  
Scheu S, Schlitt N, Tiunov AV, Newington JE, Jones TH. 2002. Effects of the prese  
Scheu S, Simmerling F. 2004. Growth and reproduction of fungal feeding Collembol  
Scheublin TR, Ridgway KP, Young JPW, van der Heijden MGA. 2004. Nonlegume  
Schirkonyer, U., Bauer, C. and Rothe, G. (2013) Ectomycorrhizal diversity at five c  
Schlaepfer MA, Runge MC, Sherman PW. 2002. Ecological and evolutionary traps.  
Schleuning M, Ingmann L, Strauss R, Fritz SA, Dalsgaard B, Dehling DM, Plein M,  
Schloss PD, Handelsman J. 2005. Introducing DOTUR, a computer program for def  
Schloss PD, Larget BR, Handelsman J. 2004. Integration of microbial ecology and s  
Schloss PD. 2008. Evaluating different approaches that test whether microbial comm  
Schluter D, Ricklefs RE. 1993. Convergence and the regional component of species  
Schluter D. 2001. Ecology and the origin of species. Trends Ecol. Evol. 16: 372-380  
Schmid M, Hartmann A. 2007. Molecular phylogeny and ecology of root associated  
Schmidt O, Moreth U. 1998. Characterization of indoor rot fungi by RAPD analysis  
Schmidt S, Denison WC, Moss GJ, Stewart GR. 2004. Nitrogen ecophysiology of H  
Schmidt S, Handley LL, Sangtjean T. 2006. Effects of nitrogen source and ectomycc  
Schmidt S, Stewart GR. 1997. Waterlogging and fire impacts on nitrogen availability  
Schmidt S, Stewart GR. 1997. Waterlogging and fire impacts on nitrogen availability  
Schmidt S, Stewart GR. 2003. δ15N values of tropical savanna and monsoon forest  
Schmidt S, Dennison WC, Moss GJ, Stewart GR. 2004. Nitrogen ecophysiology of  
Schmidt TSB, Rodrigues JFM, von Mering C. 2014. Ecological Consistency of SSU  
Schmit JP, Murphy JF, Mueller GM. 1999. Macrofungal diversity of a tem 3 aastal +

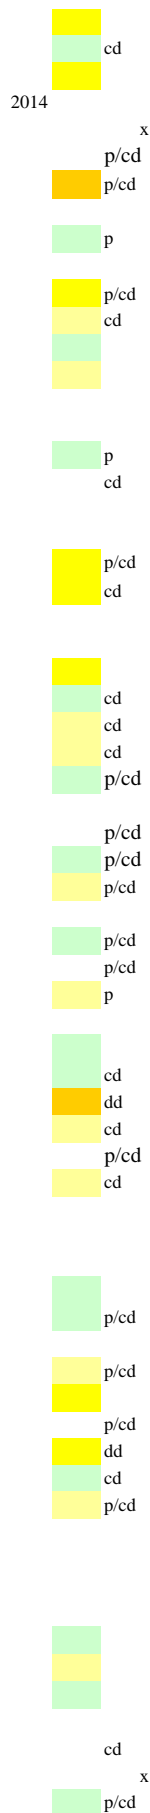

Schmit JP, Murphy JF, Mueller GM. 1999. Macrofungal diversity of a temperate forest. *Ecology* 80: 1085-1094.

Schneider K, Renker C, Maraun M. 2005. Oribatid mite (Acari, Oribatida) feeding ecology in a temperate forest. *Soil Biology and Biochemistry* 37: 1085-1094.

Schoch CL, Crous PW, Groenewald JZ, Boehm EWA, Burgess TI, de Gruyter J and Tedersoo L. 2015. Global diversity and biogeography of the Ascomycota tree of life. *Journal of Biogeography* 42: 1085-1094.

Schoch CL, Seifert KA, Huhndorf S, Robert V, Spouge JL, Levesque CA, Chen W, Schoch CL, Shoemaker RA, Seifert KA, Hambleton S, Spatafora JW, Crous PW. 2012. The Ascomycota tree of life. *Journal of Biogeography* 39: 1085-1094.

Schoch CL, Wang Z, Townsend JP, Spatafora JW. 2009. Geoglossomycetes cl. *Novae Species* 1: 1-10.

Scholes RJ, Dowty PR, Caylor K, Parsons DAB, Frost PGH, Shugart HH. 2002. Tree-ring analysis of plant colonization studies on black wastes from anthracite mining. *Journal of Biogeography* 29: 1085-1094.

Schrire BD, Lavin M, Lewis GP. 2005. Global distribution patterns of the Leguminosae. *Journal of Biogeography* 32: 1085-1094.

Schubert R, Raidl S, Funk R, Bahnweg G, Müller-Starck G, Agerer R. 2003. Quantitative analysis of endophytic fungi in a temperate forest. *Journal of Biogeography* 30: 1085-1094.

Schulz B, Boyle C, Draeger S, Römmert A-K, Krohn K. 2002. Endophytic fungi: a species list from a temperate forest. *Journal of Biogeography* 29: 1085-1094.

Schulz B, Boyle C. 2005. The endophytic continuum. *Mycological Research* 109: 661-686.

Schulz B, Sucker J, Aust HJ, Krohn K, Ludwig K, Jones PG, Döring D. 1995. Biological diversity of endophytes in a temperate forest. *Journal of Biogeography* 22: 1085-1094.

Schulz BJE, Boyle CJC, Sieber TN. 2006. Microbial root endophytes. Springer, Berlin.

Schulze E-D, Lange OL, Ziegler H, Gebauer G. 1991. Carbon and nitrogen isotope ratios in plant tissue. *Journal of Biogeography* 18: 1085-1094.

Schüssler. 2002. Molecular evolution, taxonomy and phylogeny of Geosiphon pyriformis. *Journal of Biogeography* 29: 1085-1094.

Schüßler A, Walker C. 2010. The Glomeromycota: a species list with new families and genera. *Journal of Biogeography* 37: 1085-1094.

Schuster CE, Stephenson RE, Evenden W. 1944. Mycorrhizas of filbert and walnut trees. *Journal of Biogeography* 21: 1085-1094.

Schwartz MW, Hoeksema JD, Gehring CA, Johnson NC, Klironomos JN, Abbott L. 2000. Specialization and resource trade: biological diversity in a temperate forest. *Journal of Biogeography* 27: 1085-1094.

Schwartz MW, Hoeksema JD. 1998. Specialization and resource trade: biological diversity in a temperate forest. *Journal of Biogeography* 25: 1085-1094.

Schweitzer JA, Bailey JA, Fischer DG, LeRoy CJ, Lonsdorf EV, Whitham TG, Hart SC. 2005. Nonadditive effects of mixtures of plant species on herbivory. *Journal of Biogeography* 32: 1085-1094.

Schwartz A, Le Blay G, Blaut M. 2000. Quantification of different Eubacterium species in a temperate forest. *Journal of Biogeography* 27: 1085-1094.

Scmalenberger A, Schweiger F, Tebbe CC. 2001. Effect of primers hybridizing to different bacterial species in maize rhizospheres. *Journal of Biogeography* 28: 1085-1094.

Scmalenberger A, Tebbe CC. 2003. Bacterial diversity in maize rhizospheres: conclusions from a temperate forest. *Journal of Biogeography* 30: 1085-1094.

Scotland RW, Wortley AH. 2003. How many species of seed plants are there? Taxonomic diversity in a temperate forest. *Journal of Biogeography* 30: 1085-1094.

Scotti I, Soranzo N, Ferrario S, Binelli G. 1998. Genetic variation in Norway spruce populations in a temperate forest. *Journal of Biogeography* 25: 1085-1094.

Seaver F. 1914. North American species of Aleuria and Aleurina. *Mycologia* 6: 273-283.

Seberg O. 1991. Biogeographic congruence in the South Pacific. *Australian Systematic Botany* 4: 1085-1094.

See LS, Alexander JJ. 1994. The response of seedlings of two dipterocarp species to herbivory in a temperate forest. *Journal of Biogeography* 21: 1085-1094.

Segre H, Ron R, De Malach N, Henkin Z, Mandel M, Kadmon R. 2014. Competitive interactions in a temperate forest. *Journal of Biogeography* 41: 1085-1094.

Seguritan V, Rohwer F. 2001. FastGroup: A program to dereplicate libraries of 16S rDNA sequences. *Journal of Biogeography* 28: 1085-1094.

Seifert E, Bever JD, Maron JL. 2009. Evidence for the evolution of reduced mycorrhizal dependence in a temperate forest. *Journal of Biogeography* 36: 1085-1094.

Seifert KA, Gams W. 2001. The taxonomy of anamorphic fungi. In: McLaughlin DJ, Seitzman B, Ouimette A, Mixon RL, Hobbie EA, Hobbie DS. 2011. Conservation of fungal diversity in a temperate forest. *Journal of Biogeography* 38: 1085-1094.

Selby C, Kennedy SJ, Harvey BMR. 1992. Adventitious root formation in hypocotyls of a temperate forest. *Journal of Biogeography* 19: 1085-1094.

Selmants PC, Hart SC, Boyle SI, Stark JM. 2005. Red alder (Alnus rubra) alters carbon sequestration in a temperate forest. *Journal of Biogeography* 32: 1085-1094.

Selosse M-A, Sebacina spp. *Journal of Biogeography* 37: 1085-1094.

Selosse M-A, Costa G, Di Battista C, Le Tacon F, Martin F. 1996. Meiotic segregation of a temperate forest. *Journal of Biogeography* 23: 1085-1094.

Selosse M-A, Dubois M-P, Alvarez N. 2009. Do Sebaciniales commonly associate with plants in a temperate forest? *Journal of Biogeography* 36: 1085-1094.

Selosse M-A, Faccio A, Scaj Epipactis microphylla: Tuber spp, Pezizales spp, Russulales spp. *Journal of Biogeography* 37: 1085-1094.

Selosse M-A, Jacquot D, Bouchard D, Martin F, Le Tacon F. 1998. Temporal variation in a temperate forest. *Journal of Biogeography* 25: 1085-1094.

Selosse M-A, Le Tacon F. 1998. The land flora: a phototroph-fungus partnership? *Journal of Biogeography* 25: 1085-1094.

Selosse M-A, Martin F, Le Tacon F. 1999. Survival of an introduced ectomycorrhizal fungus in a temperate forest. *Journal of Biogeography* 26: 1085-1094.

Selosse M-A, Martin F, Le Tacon F. 2001. Intraspecific variation in fruiting bodies of a temperate forest. *Journal of Biogeography* 28: 1085-1094.

Selosse M-A, Richard F, He X, Simard S. 2006. Mycorrhizal networks: des liaisons dangereuses in a temperate forest. *Journal of Biogeography* 33: 1085-1094.

Selosse M-A, Roy M. 2009. Green plants that feed on fungi: facts and questions about mycorrhizal networks in a temperate forest. *Journal of Biogeography* 36: 1085-1094.

Selosse M-A, Schardl CL. 2007. Fungal endophytes of grasses: hybrids rescued by a temperate forest. *Journal of Biogeography* 34: 1085-1094.

Selosse M-A, Setaro S, Glatard F, Richard F, Urcelay C, Weiss M. 2007. Sebacinial endophytes in a temperate forest. *Journal of Biogeography* 34: 1085-1094.

Selosse M-A, Vohnik M, Chauvet E. 2008. Out of the rivers: are some aquatic hyphomycetes in a temperate forest? *Journal of Biogeography* 35: 1085-1094.

Selosse M-A, Weiss M, Jany J-L, Tillier A. 2002. Communities and populations of ectomycorrhizal fungi in a temperate forest. *Journal of Biogeography* 29: 1085-1094.

Selosse M-A. 2003. Founder effect in a small Leccinum duriusculum (Schw.) Leccinum population in a temperate forest. *Journal of Biogeography* 30: 1085-1094.

Selosse M-A. 2005. Are liverworts imitating mycorrhizas? *New Phytologist* 165: 345-349.

Semenova TA, Morgado LN, Welker JM, Walker MD, Smets E, Geml J. 2015. Long-term effects of a temperate forest. *Journal of Biogeography* 42: 1085-1094.

Sen DN. 1961. Root ecology of Tilia europea L. -I. On the morphology of mycorrhizas. *Journal of Biogeography* 8: 1085-1094.

Sen R, Hietala AM, Zelmer CD. 1999. Common anastomosis and internal transcribed spacer sequences in a temperate forest. *Journal of Biogeography* 26: 1085-1094.

Sen R. 1990. Intraspecific variation in two species of Suillus from Scots pine (Pinus sylvestris). *Journal of Biogeography* 17: 1085-1094.

Sen R. 2000. Budgeting for the wood-wide web. *New Phytologist* 145: 161-165.

Sen R. 2001. Multitrophic interactions between a Rhizoctonia sp. and mycorrhizal fungi in a temperate forest. *Journal of Biogeography* 28: 1085-1094.

Senior E, Smith JE, Watson-Craik IA, Tosh JE. 1993. Ectomycorrhizae and landfill succession in a temperate forest. *Journal of Biogeography* 20: 1085-1094.

Senn-Irlt B, Bieri G. 1999. Sporocarp succession in soil-inhabiting macrofungi in a temperate forest. *Journal of Biogeography* 26: 1085-1094.

Sequerra J et al. 1997. Taxonomic position and intraspecific variability of the nodular ectomycorrhizal fungus in a temperate forest. *Journal of Biogeography* 24: 1085-1094.

Serna-Chavez H, Fierer N, van Bodegom PM. 2013. Global drivers and patterns of microbial diversity in a temperate forest. *Journal of Biogeography* 40: 1085-1094.

Sessitsch A, Hackl E, Wenzl P, Kilian A, Kostic T, Stralis-Pavese N, Tankouo Sandouk H, Berg MP, Jones TH. 2005. Trophic structure and functional redundancy in a temperate forest. *Journal of Biogeography* 32: 1085-1094.

cd  
p/cd  
p/cd  
p  
p/cd  
p/cd  
p  
cd  
j  
p/cd  
cd  
p  
cd  
e  
p/cd  
p/cd  
p/cd  
cd  
B  
cd  
p/cd  
p  
x  
x  
p  
p/cd  
p/cd  
p/cd  
p  
p  
p  
p

Setälä H. 2000. Reciprocal interactions between Scots pine and soil food web structure. *Setaro S, Garnica S, Herrera PI, Suarez JP, Göker M. 2012. A clustering optimization*

Setaro S, K. *Ericaceae: Vaccinioideae ja Cavendishioideae Ecuadori mägitsetades: Setaro S, W Cavendishia + S Cavendishia nobilis*: vaid Sebaciales B kladist

Seviour RJ, Willing RR, Chilvers GA. 1973. Basidiocarps associated with ericoid mycorrhizas in the forest of *Shahin O, Martin-St. Paul N, Rambal S, Joffre R, Richard F. 2013. Ectomycorrhizal Shamekh S, Grebenc T, Leisola M, Turunen O. 2014. The cultivation of oak seedling*

Shan XC, Liew ECY, Weatherhead MA, Hodgkiss IJ. 2002. Characterization and taxonomic diversity of ectomycorrhizal fungi in the forest of *Shannon P, Markiel A, Ozier O, Baliga NS, Wang JT, Ramage D, Amin N, Schwikowski S, Sharma R, Rajak RC, Pandey AK. 2009. Ectomycorrhizal mushrooms in India*

Sharon M, Kuninaga S, Hyakumachi M, Naito S, Sneh B. 2008. Classification of *Rhizoglyphus* species based on molecular data *Sharon M, Kuninaga S, Hyakumachi M, Sneh B. 2006. The advancing identification of ectomycorrhizal fungi*

Sharp C, Pearce G. 1999. Some interesting gasteroid fungi from Zimbabwe. *Kew Bulletin* 53: 1-10

Sharples JM, Cairney JWG. 1997. Assimilation of inorganic nitrogen by a mycobiont of an ectomycorrhizal fungus. *Plant and Soil* 192: 1-10

Sharples JM, Cairney JWG. 1997. Organic nitrogen utilization by an unidentified mycobiont of an ectomycorrhizal fungus. *Plant and Soil* 192: 11-18

Sharples JM, Chambers SM, Meharg AA, Cairney JWG. 2000. Genetic diversity of *Rhizoglyphus* species based on molecular data *Shaw PJA, Lankey K, Jourdan A. 1996. Factors affecting yield of Tuber melanosporum*

Shaw TM, Dighton J, Sanders FE. 1995. Interactions between ectomycorrhizal fungi and plants. *Plant and Soil* 178: 1-10

Shefferson RP, Cowden CC, McCormick MK, Yukawa T, Ogura-Tsujita Y, Hashino T, Shefferson RP, Kull T, Tali K. 2008. Mycorrhizal interactions of orchids colonizing *Shemakhanova NM. 1956. Hebeloma crustuliniforme - mikorizo-obrazovatel duba*

Shemakhanova NM. 1956. Hebeloma crustuliniforme - mikorizo-obrazovatel duba. *Trudy Vsesoyuznogo Nauchno-Issledovatel'skogo Instituta Lesnogo Khozaystva* 1: 1-10

Sherwood S, Bony S, Dufresne J-L. 2014. Spread in model climate sensitivity traced by fossil pollen. *Science* 343: 737-739

Sherwood S, Fu Q. 2014. A drier future? *Science* 343: 737-739

Shi L, Gutte x pöök: vs poud poud ei mojutatud: *Lactarius* subdud

Shimbo PN, Newton AC, Leakey RRB. 1996. Vegetative propagation of *Gnetum africanum* by mycorrhizal fungi. *Plant and Soil* 182: 1-10

Shimada M, Akamatsu Y, Tokimatsu T, Mii K, Hattori T. 1997. Possible biochemical pathways for the synthesis of *Shimura H, Sadamoto M, Matsuura M, Kawahara T, Naito S, Koda Y. 2009. Characterization of ectomycorrhizal fungi*

Shinohara M, LoBuglio KF, Cenococcum sp. isolaadid

Shinohara M, LoBuglio KF, Cenococcum-taksoneisene üle maailma vs rDNA 2D s

Sieber TN, Grünig CR. 2006. Biodiversity of fungal root-endophyte communities in forest trees. *Plant and Soil* 283: 1-10

Sieber TN. 2007. Endophytic fungi in forest trees: are they mutualists? *Fungal Biology* 111: 1-10

Siebert BD et al., An improved PCR method for walking in uncloned genomic DNA *Sigler L, Allen T, Lim SR, Berch S, Berbee M. 2005. Two new Cryptosporiopsis species*

Sigüenza C, Espejel I, Allen EB. 1996. Seasonality of mycorrhizae in coastal sand dunes. *Plant and Soil* 182: 1-10

Silvani VA, Fracchia S, Fernandez L, Pergola M, Godeas A. 2008. A simple method for the isolation of mycorrhizal fungi. *Plant and Soil* 254: 1-10

Silvertown J, Dodd M, Gowing D, Lawson C, McConway K. 2006. Phylogeny and evolution of mycorrhizal fungi. *Plant and Soil* 283: 1-10

Silvertown J, Dodd M, Gowing D. Phylogeny and the niche structure of meadow mycorrhizal fungi. *Plant and Soil* 283: 1-10

Silvertown JW. 1981. Micro-spatial heterogeneity and seedling demography in species-rich grasslands. *Journal of Ecology* 69: 1-10

Simard SW, Beiler KJ, Bingham MA, Deslippe JR, Philip LJ, Teste FP. 2012. Mycorrhizal fungi: carbon allocation and carbon transfer between plants. *Plant and Soil* 358: 1-10

Simard SW, Jones MD, Durall DM, Perry DA, Myrold DD, Molina R. 1997. Reciprocal effects of mycorrhizal fungi on plant growth. *Plant and Soil* 192: 1-10

Simard SW, Jones MD, Durall DM. 2002. Carbon and Nutrient Fluxes Within and Between Plants and Mycorrhizal Fungi. *Plant and Soil* 243: 1-10

Simard SW, Martin K, Vyse A, Larson B. 2013. Meta-networks of fungi, fauna and plants. *Plant and Soil* 365: 1-10

Simard SW, Perry DA, Jones MD, Myrold DD, Durall DM, Molina RM. 1997. Net primary production and mycorrhizal fungi. *Plant and Soil* 192: 1-10

Simard SW, ebatsuugal ebatsuuga istikute ebatsuugal: läbikaevatud juurtega (tr) *Simard SW, Radosevich SR, Sachs DL, Hagerman SM. 2006. Evidence for competition between mycorrhizal fungi*

Simon C, Daniel R. 2011. Metagenomic analyses: past and future trends. *Applied and Environmental Microbiology* 77: 1-10

Simon L et al. 1993. Origin and diversification of endomycorrhizal fungi and coincidence with the evolution of angiosperms. *Plant and Soil* 152: 1-10

Simon L, Lalonde M, Bruns TD. 1992. Specific amplification of 18S fungal ribosomal DNA from mycorrhizal fungi. *Plant and Soil* 142: 1-10

Simon MF, Grether R, de Queiroz LP, Skema C, Pennington RT, Hughes CE. 2009. Intraspecific variation of fungal ribosomal genes is high in *Simonsen L, Weis M. 2008. Intraspecific variation of fungal ribosomal genes is high in*

Sims K, Watling R, de la Cruz R, Jeffries P. 1997. Ectomycorrhizal fungi in the forest of *Sims KP, Sen R, Watling R, Jeffries P. 1999. Species and population structures of P*

Singer R, Araujo Aguiar I. 1986. Litter decomposing and ectomycorrhizal fungi in the forest of *Singer R, Araujo I, Ivory MH. 1983. The ectotrophically mycorrhizal fungus Lõuna-A*

Singer R, Digilio APL. 1951. Prodrómo de la flora agaricina Argentina. *Li Lõuna-A*

Singer R, Morello JH. 1960. Ecotrophic forest tree mycorrhizae and forest communities in the forest of *Singer R, Moser M. 1964. Forest mycology and forest communities in South America*

Singer R. 1944. Genera of fungi. *Mycologia* 36: 358-368.

Singer R. 1948. New genera of fungi-IV. *Mycologia* 40: 262-264.

Singer R. 1952. Russulaceae of Trinidad and Venezuela. *Kew Bull.* 7: 295-301.

Singer R. 1953. Four years of mycological work in southern South America. *Lõuna-A*

Singer R. 1962. Monographs of South American Basidiomycetes, especially those of the forest of *Singer R. 1964. Boletes and related groups in South America. Nova Hedw.*

Singer R. 1964. Boletes and related groups in South America. *Nova Hedw.* 101: 1-10

Singer R. 1968. Sand dune inhabiting fungi of the South Atlantic coast from *liivaluude*

Singer R. 1970. New agarics from South America. *Nova Hedw.* 20: 785-792.



t  
p/cd  
  
cd  
p/cd  
  
p/cd  
cd  
  
p  
  
1  
cd  
cd  
p/cd  
  
1  
p/cd  
p  
  
p/cd  
  
p/cd  
  
p/cd  
cd  
  
p/cd  
cd  
  
cd  
j/cd  
  
cd  
p  
  
x  
  
p/cd  
  
p/cd  
  
p/cd  
  
x  
x  
  
p  
  
cd  
cd  
p

Sonstebo JE jumps *Bistorta vivipara* Tomentella, Inocybe, Sebacinia  
Southworth D, Carrington E, *Quercus garrya* taimla: *Laccaria* sp, Tuber sp; v  
Southworth D, Donohue J, F Pinus-Quercus Tom-thel  
Spain AV, Gordon V, Reddell P, Correll R. 2004. Ectomycorrhizal fungal spores in  
Spatafora JW, Johnson D, Sung G-H, Hosaka K, O'Rourke B, Serdani M, Spotts R,  
Spatafora JW, Owensby CA, Douhan GW, Boehm EWA, Schoch CL. 2012. Phylog  
Sprent JI. 2007. Evolving ideas of legume evolution and diversity: a taxonomic pers  
Sprent JL, James UK. 2007. Legume evolution: where do nodules and mycorrhizas f  
Sridhar KR, Beaton M, Bärk amfipoodide sitast seente DNA määramine: 18;  
St. Hilaire LR, Leopold DJ. 1995. Conifer seedling distribution in relation to microsi  
St. John H. 1951. The distribution of *Pisonia grandis* (Nyctaginaceae). *Webbia* 8: 22  
St. John TV, Uhl C. 1983. Mycorrhizae in the rain forest at San Carlos de Rio Negr  
St. John TV. 1980. A survey of mycorrhizal infection in an amazonian rain forest. A  
Stach JEM, Maldonado LA, Masson DG, Ward AC, Goodfellow M, Bull AT. 2003.  
Staddon PL, Bronk Ramsey C, Ostle N, Ineson P, Fitter AH. 2003. Rapid turnover c  
Stadenrausch S, Kaldorf M, *kask uraanikaeva kaevandus: Lactarius decipiens*, Mel.  
Stahl E. 1900. Der Sinn der Mycorrhizenbildung. *Jahrb. Wissenschaftl. Bot.* 34: 539-  
Stajich JE, Berbee ML, Blackwell, Hobbett DS, James TY, Spatafora JW, Taylor JW  
Stamatakis A, Hoover P, Rougemont J. 2008. A rapid bootstrap algorithm for the R/  
Stamatakis A. 2006. RAXML-VI-HPC: maximum likelihood-based phylogenetic ana  
Stanford AM, Harden R, Parks CR. 2000. Phylogeny and biogeography of *Juglans* (.  
Stanton NL. 1988. The underground in grasslands. *Annu. Rev. Ecol. Syst.* 19: 573-5  
Starost M, Kõljalg U, Karp K, Vool E, Noormets M, Paal T. 2006. Mycorrhizal col  
Stark C, Babik W, Durka W. 2009. Fungi from the roots of the common terrestrial o  
Stark NM. 1971. Mycorrhizae and Nutrient Cycling in the Tropics. *Hacskaylo E* (ed  
Starr JR, Harris SA, Simpson DA. 2004. Phylogeny of the unispicate taxa in *Cypera*  
StatSoft, Inc., 2001. STATISTICA (data analysis software system), version 6. www  
Steane DA, Wilson KL, Hill RS. 2003. Using matK sequence data to unravel the ph  
Stears RL, Martinski T, Schena M. 2003. Trends in microarray analysis. *Nature Me  
Steele JA, Countway PD, Xia L, Vigil PD, Beman JM, Kim DY, Chow CET, Sach  
Stefani FOP, Berube JA. 2006. Biodiversity of foliar fungal endophytes in white spr  
Stefani FOP, Hamelin RC. 2010. Current state of genetically modified plant impact  
Stefani FOP, Jones RH, May TW. 2014. Concordance of seven gene genealogies co  
Stefani FOP, Moncalvo J-M, Seguin A, Berube JA, Hamelin RC. 2009. Impact of ar  
Stein A, Fortin JA. 1990. Enhanced rooting of *Picea mariana* cuttings by ectomycorr  
Stein A, Fortin JA. 1990. Pattern of root initiation by an ectomycorrhizal fungus on l  
Steiner M, Linkov I, Yoshida S. 2002. The role of fungi in the transfer and cycling o  
Stendell ER, Horton TR, Br *Pinus ponderosa*: kontroll: *Russula*, *Rhizopogon*, Tom  
Stenlid J, Gustafsson M. 2001. Are rare wood decay fungi threatened by inability to  
Stenlid J, Rayner ADM. 1989. Tansley review No. 19. Environmental and endogen  
Stenlid J, Rayner ADM. 1991. Patterns of nuclear migration and heterokaryosis in p  
Stenlid J. 1985. Population structure of *Heterobasidion annosum* as determined by s  
Stenlid J. 2000. Variation with and without sex in mycorrhizal fungi. *Oikos* 90: 609-  
Stenström E. 1991. The effects of flooding on the formation of ectomycorrhizae in P  
Stergios BD, Aymard GA. 2008. A striking new species of *Aldina* (Fabaceae-Swart  
Stern RF, Andersen RA, Jameson I, Küpper FC, Coffroth M-A, Vulot D. 2012. Ev  
Steucl B, Hector A, Friedl T, Löffke C, Lorenz M, Wesche M, Kessler M. 2012. Bi  
Stevens GC. 1989. The latitudinal gradient in geographical range: how so many spec  
Stevenson G. 1962. The Agaricales of New Zealand: IV. *Kew Bull.* 16: 373-384.  
Stewart GH, Rose AB, Veblen TT. 1991. Forest development in canopy gaps in old-  
Stewart-Oaten. 1995. Rules and judgements in statistics: three examples. *Ecology* 76  
Stielow B, Bubner B, Hensel G, Münzenberger B, Hoffmann P, Klenk H-P, Göker M  
Stielow B, Hensel G, Strobelt D, Makonde HM, Rohde M, Dijkstraerhuis J, Klenk H-  
Stinson KA, Campbell SA, Powell JR, Wolfe BE, Callaway RM, Thelen GC, Hallet  
Stobbe U, Stobbe A, Sproll L, Tegel W, Peter M, Büntgen U, Egli S. 2013. New evi  
Stocker TF, Qin D, Plattner K, Tignor MMB, Allen SK, Boschung J, Nauels A, Xia  
Stockinger H, Krüger M, Schüssler A. 2010. DNA barcoding of arbuscular mycorrh  
Stockinger H, Peyret-Guzzon M, Koegel S, Bouffaud M-L, Redecker D. 2014. The  
Stockinger H, Walker C, Schübler A. 2009. 'Glomus intraradices DAOM197198', a  
Stoll P, Prati D. 2001. Intraspecific aggregation alters competitive interactions in ex  
Stone EL, Kalisz PJ. 1991. On the maximum extent of tree roots. *For. Ecol. Manage  
Straatsma G, Ayer F, Egli S. 2001. Species richness, abundance, and phen xxx, 21a  
Straatsma G, Konings RNH, van Griensven LJLD. 1985. A strain collection of the n  
Stralis-Pavese N, Sessitsch *metanotroofidel* ARRAY põhjal  
Straub TM, Daly DS, Wunshel S, Rochelle PA, DeLeon R, Chandler DP. 2002. Ger  
Strauss SY. 2001. Benefits and risks of biotic exchange between *Eucalyptus plantati  
Strickland MJ, Osburn E, Lauber C, Fierer N, Bradford MA. 2009. Litter quality is i  
Strickland MS, Lauber C, Fierer N, Bradford MA. 2009. Testing the functional signi***



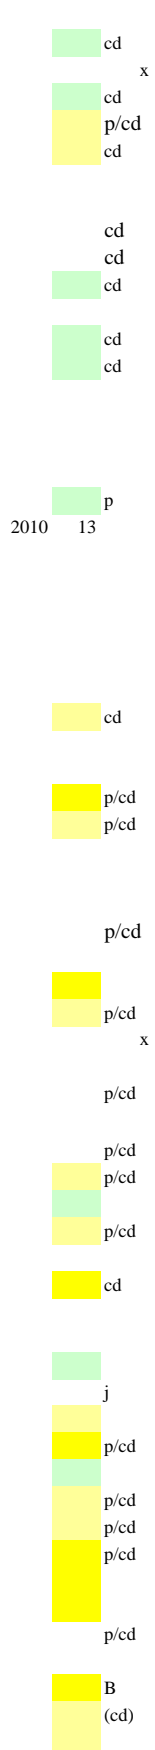

Strullu DG, Grellier B, Marciniak D, Letouze R. 1986. Micropropagation of chestnut  
 Strzelczyk E, Kampert M, Pachlewski R. 1994. The influence of pH and temperature  
 Stubbe D, Nuytinck J, Verbeke A. 2010. Critical assessment of the *Lactarius gera*.  
 Stukenbrock EH, Christiansen FB, Hansen TT, Duthiel JY, Schierup MH. 2012. *Fus*  
 Stukenbrock EH, Rosendahl S. 2005. Development and amplification of multiple co-  
 Stursova M, Snajdr J, Cajthaml T, Barta J, Santruckova H, Baldrian P. 2014. When  
 Su JC et al. 2004. Beyond species richness: community similarity as a measure of cr  
 Suarez JP, Weib M, Abele A, Oberwinker F, Kottke I. 2008. Members of Sebacin  
 Sulkava P, Huhta V. 1998. Habitat patchiness affects decomposition and faunal dive  
 Summerbell RC. 1987. The inhibitory effect of *Trichoderma* species and other soil  
 Summerbell RC. 1988. Benomyl-tolerant microfungi associated with mycorrhizae of  
 Summerbell RC. 1989. Microfungi associated with the mycorrhizal mantle and adja  
 Summerell BA, Leslie JF. 2004. Genetic diversity and population structure of plant-  
 Sun G, Dilcher DL, Zheng S, Zhou Z. 1998. In search of the first flower: a Jurassic  
 Sun Y-P, Fries N. 1992. The effect of tree root exudates on the growth rate of ecto  
 Sun Y-P, Unestam T, Lucas SD, Johanson KJ, Kenne L, Finlay RD. 1999. Exudatio  
 Sundaram S, Brand JH, Hymes MJ, Hiramath S, Podila GK. 2003. Isolation and ana  
 Sunderland T, Walters G, Issembe Y. 2004. A preliminary vegetation assessment of  
 Supplementary information  
 Šutara J. 2008. *Xerocomus* s. l. in the light of the present state of knowledge. Czech  
 Šutara J. 2008. *Xerocomus* s. l. in the light of the present state of knowledge. Czech  
 Sutherland JR, Hopkinson SJ, Farris SH. 1984. Inland spruce cone rust, *Chrysomyx*  
 Suvi T, Tedersoo L, Abarenkov K, Gerlach J, Beaver K, Kõljalg U. 2010. Mycorrh  
 Suz LM, Barsoum N, Benhai Kesk-Euroopa Kontakt-tüüp ja *Scleroderma* of  
 Suz LM, Martin MP, Colinas C. 2006. Detection of *Tuber melanosporum* DNA in s  
 Suzek BE, Huang H, McGarvey P, Mazumder R, Wu CH. 2007. UniRef: comprehe  
 Suzuki R, Shimodaira H. 2006. Pvcust: an R package for assessing the uncertainty i  
 Swarts ND, Sinclair EA, Francis A, Dixon KW. 2010. Ecological specialization in n  
 Swaty RL, Gehring CA, van Ert M, Theimer TC, Keim P, Whitham TG. 1998. Temp  
 Swaty RL, Deckert RJ, Whitpõuakahj ALADE puudel madalam liigirikkus, diversit  
 Swedjemark G, Stenlid J. 2001. A high diverse population of *Heterobasidion annos*  
 Sweeney M, Harmey MA, Mitchell DT. 1996. Detection and identification of *Lacca*  
 Swenson NG, Enquist BJ, Pither J, Thompson J, Zimmerman JK. 2006. The proble  
 Swenson U, Backlund A, McLoughlin S, Hill RS. 2001. Nothofagus biogeography r  
 Swofford DL. 2002. PAUP\*. Phylogenetic Analysis Using Parsimony (\*and Other M  
 Sykes WR. 1982. Checklist of dicotyledons naturalized in New Zealand 15. N. Z. J.  
 Sykes WR. 1987. The parapara, *Pisonia brunoniana*. N: Z. J. Bot. 25: 459-466.  
 Sylvia DM, Chellemi DO. Interactions among Root-Inhabiting Fungi and Their Impl  
 Sylvia DM, Sinclair WA. 1983. Suppressive influence of *Laccaria laccata* on *Fusari*  
 Symonds MRE, Moussali A. 2011. A brief guide to model selection, multimodel inf  
 Sysma KJ, Litt A, Zjhra ML, Pires JC, Nepokroeff M, Conti E, Walker J, Wilson P  
 Szava-Kovats RC, Zobel M, Pärtel M. 2011. The local-regional species richness rel  
 Tagu D, Rampant PF, Lapeyrie F, Frey-Klett P, Vion P, Villar M. 2001. Variation ir  
 Talbot JM, Allison SD, Treseder KK. 2008. Decomposers in disguise: mycorrhizal f  
 Talbot JM, Bruns TD, Taylor USAs Pinaceae: Mänd mujal vs *Picea* Alaskal.  
 Tallantire PA. 1974. The palaeohistory of grey alder (*Alnus incana*) and black alder  
 Tallents LA, Lovett JC, Hall JB, Hamilton AC. 2005. Phylogenetic diversity of fores  
 Tammi H, Tsuillus bov, ts su mikrokosmoses metsahuumusel  
 Taniguchi T, Kanzaki N, Tar JPN, vs *Robinia* vähe: Cenoc, unkn. Russula  
 Tarkka M, Nyman TA, Kalkkinen N, Raudaskoski M. 2001. Scots pine expresses s  
 Taroncher-Oldenburger G, Griner EN, Francis CA, Ward BB. 2003. Oligonucleotide r  
 Tata HL, van Noordwijk M, kummiistandik *Tomentella* spp, *Pisolithus*, *Scl*  
 Tate JA, Simpson BB. 2003. Paraphyly of *Tarasa* (Malvaceae) and diverse origins o  
 Tautz D, Arctander P, Minelli A, Thomas RH, Vogler AP. 2003. A plea for DNA ta  
 Taylor AFS *Russula aeruginea*  
 Taylor AFS *Tylospora fibrillosa*=*Piceirhiza guttata*  
 Taylor AFS, Alexander IJ. 2005. The ectomycorrhizal symbiosis: life in the real wor  
 Taylor AFS, Finlay RD. 200. dolomiit (BD san Kontroll: *Tylospora fibrill*, Hygroph  
 Taylor AFS, Fransson PMA, Högberg P, Högberg MN, Plamboeck AH. 2003. Spec  
 Taylor AFS, Gebauer G, Read DJ. 2004. Uptake of nitrogen and carbon from doubl  
 Taylor AFS, Högberg L, Högberg M, Lyon AJE, Näsholm T. 1997. Natural 15N ab  
 Taylor AFS xxx 4 kuusikut, 4 pöö pöök: *Russula ochroleuca*; 4 kuusiku  
 Taylor AFS. 2002. Fungal di probleemid, arute lu, valemid, suhted vs ECM;  
 Taylor AFS. 2008. Missing links-δ13C anomalies between substrates and consumer  
 Taylor AFS. 2008. Recent advances in our understanding of fungal ecology. Coolia  
 Taylor DL, Bruns TD, Leake orhideedel, seeni illelistel: ülevaade  
 Taylor DL, Bruns TD, Szaro orhidee *Hexalecti Sebacina* spp varietetideli erinevad h  
 Taylor DL, Bruns TD. 1997. Independent, specialized invasions of ectomycorrhizal



p  
 n  
 j  
 p/cd  
 cd  
 p  
 p  
 p/cd  
 cd  
 p/cd  
 p/cd  
 p/cd  
 p  
 p  
 p/cd  
 p/cd  
 cd  
 cd  
 cd  
 p/cd  
 p/cd  
 p  
 p  
 p  
 cd  
 p  
 p/cd  
 p/cd  
 p/cd  
 p  
 p  
 p/cd  
 p/cd

x

Theodorou C, Reddell P. 1991. In vitro synthesis of ectomycorrhizas on *C. Allocasu*

Theuerl S, Buscot F. 2010. Laccases: toward disentangling their diversity and functi

Thiers HD. 1979. New and interesting hypogeous and secotiid fungi from Californi

Thiers HD. 1984. The secotiid syndrome. *Mycologia* 76: 1-8. põhjuste

Thiers HD. 1989. *Gastroboletus* revisited. *Mem. New York Bot. Gard.* 49: 355-355

Thiet RK, Boerner REJ. 2007. Spatial patterns of ectomycorrhizal fungal inoculum i

Thirup J, Johansen A, Windi bakterite ja aktinobakterite suksessioon juurtel ja null

Thoen D, B. Senegalis Uapaca guineensis ja Afzelia africana puistutes: lüi Senegalis

Thoen D, D kohalikel puudel Senegalis EcM palju jamedam kui sissetoodi: Senegali

Thoen D, Ducouso M. 1989. Mycorrhizal habit and sclerogenesis of *Phlebobus suc*

Thoen D. 1974. Premieres indications sur les mycorrhizes et les champignons mycorr

Thoen D. 1993. Looking for ectomycorrhizal trees and ectomycorrhizal fungi in trop

Thomas CD and 18 others. Extinction risk from climate change. *Nature* 427: 145-14

Thomas GW Thelephora terrestris, Laccaria laccata jpt tundmatute seente I

Thomas KA, Peintner U, Moser MM, Manimohan P. 2002. *Anamika* , a new mycor

Thomas SE, Crozier J, Aime MC, Evans HC, Holmes KA. 2008. Molecular charact

Thomazini LL. 1973. Mycorrhiza in plants of the 'Cerrado'. *Plant Soil* 41: 707-711.

Thompson JN. 2009. The coevolving web of life. *Am. Nat.* 173: 125-140.

Thompson W, Rayner ADM. 1982. Spatial structure of a population of *Tricholomop*

Thomson BD, Hardy GES, N muutused peale väljaistutamist: inokuleeritud seene väl

Thrall PH, Burdon JJ. 2002. Evolution of gene-for-gene systems in metapopulations:

Thrall PH, Burdon JJ. 2003. Evolution of virulence in a plant host-pathogen metapo

Thrall PH, Hochberg ME, Burdon JJ, Bever JD. 2007. Coevolution of symbiotic mu

Tian C, He X, Zhong Y, Chen J. 2003. Effect of inoculation with ecto-and arbuscula

Tibbett M, Sanders FE, Minto SJ, Dowell M, Cairney JWG. 1998. Utilization of erg

Tibbett M, Sanders FE. 2002. Ectomycorrhizal symbiosis can alter plant nutrition th

Tiffany BH, Manchester SR. 2001. The use of geological and palaeontological evide

Tilman D, Reich PB, Isbell F. 2012. Biodiversity impacts ecosystem productivity as

Tilman D, Reich PB, Knops JMH. 2006. Biodiversity and ecosystem stability in a de

Tilman D. 1994. Competition and biodiversity in spatially structured habitats. *Ecol*

Tilman D. 1996. Biodiversity: population versus ecosystem stability. *Ecology* 77: 35

Tilman D. 1999. The ecological consequences of changes in biodiversity: a search fo

Timberlake J. 2000. Biodiversity of the Zambezi basin. *Occasional Publications in B*

Timling I, Dahlberg A, Walk Kanda ja Alaska arktikas; Dryas vs Salix; erine

Timling I, Dahlberg A, Walker DA, Gardes M, Charcosset JY, Welker JM, Taylor I

Timling I, Walker DA, Nusb mullaseened Kanadas NAAT transektil: EcM s

Timms R, Read AF. 1999. What makes a specialist special? *Trends Ecol. Evol.* 14: :

Timonen S, Kauppinen P. 20 Tilia sp linnas Tuber 3 spp, Russula

Timonen S, Sen R. 1998. Heterogeneity of fungal and plant enzyme expression in in

Timonen S, Tammi H, Sen R. 1997. Characterization of the host genotype and funga

Timonen S, Tammi H, Sen R. 1997. Outcome of interactions between genets of two

Timoney KP, Peterson G, Wein R. 1997. Vegetation development in boreal riparian

Tittensor DP, Mora C, Jetz W, Lotze HK, Ricard D, Vanden Bergh E, Worm B. 20

Tiunov AV, Scheu S. 2005. Facilitative interactions rather than resource partitioning

Tixier M-S, Guichou S, Kreiter S. 2010. Assessment of the usefulness of eight DNA

Tjorve E, Kunin WE, Polce C, Calf Tjorve KM. 2008. Species-area relationship: se

Toftegaard T, Iason GR, Ale Pyrolya media ju Suillus var, Amph, Russ, Pilod

Toju H, Guimaraes PR, Olesen JM, Thompson JN. 2014. Assembly of complex plar

Toju H, Tanabe AS, Yamamoto S, Sato H. 2012. High-coverage ITS primers for the

Toljander JF, Eberhardt U, Tokasmetsas Põhje seente kooslused gradiendi eri osade:

Tommerup IC, Bougher NL. 1999. The role of ectomycorrhizal fungi in nutrient cycl

Tonkin CM, Malajczuk N, McComb JA. 1989. Ectomycorrhizal formation by micro

Tornberg K, Olsson S. 2002. Detection of hydroxyl radicals produced by wood-dec

Torres Aquino M, Plassard C. 2004. Dynamics of ectomycorrhizal mycelial growth:

Torres P, Honrubia M. 1994. Inoculation of containerized *Pinus halepensis* seedlings:

Torti SD, Coley PD, Kursar T. 2001. Causes and consequences of monodominance:

Torti SD, Coley PD. 1999. Tropical Monodominance: A Preliminary Test of the Ect

Trapnell CG. 1959. Ecological results of woodland burning experiments in Northern

Trappe J, Molina R, Luoma D, Cazares E, Pilz D, Smith JE and 4 others. 2009. Div

Trappe JM, Bougher NL. 1999. The role of ectomycorrhizal fungi in nutrient cycl

Trappe JM, Bougher NL. 2002. Australasian sequestrate (truffle-like) fungi. XI. *Gu*

Trappe JM, Bushwell W, Castellano MA. 1997. NATS truffle and truffle-like fungi:

Trappe JM, Castellano MA, Halling RE, Osmundson TW, Binder M, Fechner N, M:

Trappe JM, Martellia medlockii sünt ja kirjeldus

Trappe JM, Castellano MA. 2000. New sequestrate Ascomycota and Basidiomycot

Trappe JM, Claridge AW, Arora D, Smit WA. 2008. Desert truffles of the African K

Trappe JM, Claridge AW, Claridge DL, Liddle L. 2008. Desert truffles of the Austr

 b  
 p/cd  
 p  
 j  
 p/cd  
 cd  
 p/cd  
  
 cd  
 p/cd  
 p/cd  
 cd  
 p  
  
 p/cd  
 p/cd  
 cd  
 e  
 p  
 cd  
 p/cd  
 p/cd  
  
 p  
 p/cd  
  
 cd  
 cd  
  
 p/cd  
  
 p  
 cd  
  
 p/cd  
  
 p/cd  
  
 2011 34  
 p/cd  
 cd  
 cd

Trappe JM, Claridge AW. 2005. Hypogeous fungi: evolution of reproductive **arv maas**  
 Trappe JM, Kovacs GM, Claridge AW. 2009. Comparative taxonomy of desert truffle  
 Trappe JM, Kovacs GM, Claridge AW. 2009. Comparative taxonomy of desert truffle  
 Trappe JM. 1962. Fungus associates of ectotrophic mycorrhizae. Bot. Rev. 28: 538-  
 Trappe JM. 1964. Mycorrhizal hosts and distribution of Cenococcum graniforme. LI  
 Trappe JM. 1967. Pure culture synthesis of Douglas fir mycorrhizae with species of  
 Trappe JM. 1971. A synopsis of the Carbotomycetaceae and Terfeziaceae (Tuberales)  
 Trappe JM. 1971. Mycorrhiza-forming Ascomycetes. In: HacsKaylo E (ed. ). Mycor  
 Trappe JM. 2005. A.B. Frank and mycorrhizae: the challenge to evolutionary and ec  
 Trappe MJ, Trappe JM, Bonito GM. 2010. *Kalapuya brunnea* gen. & sp. nov. and  
 Treadeder KK, Allen MF, Ruess RW, Pregitzer KS, Hendrick RL. 2005. Lifespans of  
 Treadeder KK, Cross A. 2006. Global distributions of arbuscular mycorrhizal fungi. E  
 Treadeder KK, Czimeczik CI, Trumbore SE, Allison SD. 2008. Uptake of an amino ac  
 Treadeder KK, Maltz M, Hawkins BA, Fierer N, Stajich JE, McGuire KL. 2014. Evo  
 Treadeder KK, Maltz MR, Hawkins BA, Fierer N, Stajich JE, McGuire KL. 2014. Ev  
 Treadeder KK, Masiello CA, Lansing JL, Allen MF. 2004. Species-specific measure  
 Treadeder KK, Torn MS, Masiello CA. 2006. An ecosystem-scale radiocarbon tracer  
 Treadeder KK, Turner KM, Mack MC. 2007. Mycorrhizal responses to nitrogen ferti  
 Treadeder KK. 2004. A meta-analysis of mycorrhizal responses to nitrogen, phosphor  
 Treu R. 2004. Notes on fungi from the eastern highlands of Papua New Gu **PNG eri**  
 Triptahi SKM. 2012. The systematics and evolutionary perspectives of fossil fungi. I  
 Triptahi SKM. 2012. The systematics and evolutionary perspectives of fossil fungi. I  
 Trocha LK, Kalucka I, Stasi **eri puuliikide** standikes. Männiliigid olid oma  
 Trocha LK, Mucha J, Eissenstat DM, Reich PB, Oleksyn J. 2010. Ectomycorrhizal i  
 Trocha LK, Oleksyn J, Turz **punakivitellisel** ki *Lactarius pubescens*, *Hebeloma meso*  
 Trocha LK, Rudawska M, L **kuusel metsataim** *Sagedasimid Wilcoxina mikolae*, Ca  
 Troesch A, Nguyen H, Miyada CG, Desvarenne C, Gingeras TR, Kaplan PM, Cros  
 Trojanowski J, Hüttermann A. 1987. Screening of wood-inhabiting fungi for their ca  
 Trost T. Ag **uute morfotüüpi** **kuusikus**: vana vs vana: *Tylospora*, *Cenococcum*, *Pinirf*  
 Trowbridge J, Jumpponen A **Salix liustiku** **ääre Sordariaceae** 3spp, *Russula fragilis*, I  
 Trudell SA, Rygielwicz PT, Edmonds RL. 2003. Nitrogen and carbon stable isotope  
 Trudell SA, Rygielwicz PT, Edmonds RL. 2004. Patterns of nitrogen and carbon stat  
 Truszkowska W. 1951. Badania nad mykotrofizmem nizinnego zespołu lakowego n  
 Truszkowska W. 1953. Mykotrofizm olesow Białowieskiego Parku Narodowego i I  
 Truu J, Truu M, Lõhmus K, Ostonen I, Ivask M, Kanal A. 2001. Structure and activ  
 Tulasne L-R, Tulasne C. 1845. Memoire pour servir a l'histoire des champignons hyp  
 Tulasne L-R, Tulasne C. 1943. Champignons hypogés de la famille des Lycoperdact  
 Turgeman T, Asher JB, Roth-Bejerano N, Kagan-Zur V, Kapulnik Y, Sitrit Y. 2011.  
 Turjaman M, Tamai Y, Segah H, Limin SH, Cha JY, Osaki M, Tawaraya K. 2005. I  
 Turnau K, Berger A, Loewe A, Einig W, Hampp R, Chalot M, Diezengremel P, Kot  
 Turnau K, Przybyłowicz WJ, Mesjasz-Przybyłowicz J. 2001. Heavy metal distributi  
 Turner H, Hovenkamp P, van Welzen PC. 2001. Biogeography of Southeast Asia an  
 Turner S, Pryer KM, Miao VPW, Palmer JD. 1999. Investigating deep phylogenetic  
 Turner TR, James EK, Poole RS. 2013. The plant microbiome. Genome Biol. 14:20  
 Twieg B, Durall DM, Simar **CAN Pseudotsug** **Domin Thelephoraceae** (21), Cortina  
 Tyler G. 1992. Tree species affinity of decomposer and ectomycorrhizal m **tamm vs**  
 Tylianakis JM, Tscharntke T, Lewis OT. 2007. Habitat modification alters the struct  
 Tzean SS, Barron L. 1983. A new predatory hyphomycete capturing bdelloid rotifer:  
 Uecker FA. 1967. *Stephensia shanori*. I. Cytology of the ascus and other observatic  
 Uehling JK, Henkel TW, Vilgalys R, Smith ME. 2012. *Membranomyces* species ar  
 Uetake Y, F **OrM**: *Ceratobasidium* vs *Spiranthes*: morf ja aktiini paigutus mykoriaisa  
 Ugawa S, F **vedelkultuuris** kasvatatud puudel olemasoleva EcMde mantlid hävineva  
 Ugolini FC. 1968. Soil development and alder invasion in a recently deglaciated are  
 Ugolini FC. Soil development and alder invasion in a recently deglaciated area of GI  
 Uhl M, Agerer R. 1987. Studies on ectomycorrhizae XI. Mycorrhizae formed by *De*  
 Uibopuu A, Moora M, Saks Ü, Daniell T, Zobel M, Öpik M. 2009. Differential effe  
 Ulrich E. 1937. Ergebnisse neuerer Forschungen über die Mykorrhiza. Ges. Naturfo  
 Ulrich W, Almeida-Neto M, Gotelli NJ. 2009. A consumer's guide to nestedness an  
 Ulrich W, Gotelli NJ. 2007. Disentangling community patterns of nestedness and sp  
 Ulrich W, Piwczynski M, Maestre FT, Gotelli NJ. 2012. Null model tests for niche c  
 Umata H. 2000. Germination and growth of *Erythrorchis ochobiensis* (Orchidaceae)  
 Unestam T, **hüdrofoobsus** vs hüdrofiilsus-mütseel  
 Unestam T. 1991. Water repellency, mat formation, and leaf-stimulated growth of sc  
 Untereiner WA, Angus A, Réblova M, Orr M-J. 2008. Systematics of the *Phialoph*  
 Untereiner M, Jumpponen A, Öpik M, Tedersoo L, Moora M, Dormann CF, Schnit  
 Upson R, Read DJ, Newsham KK. 2007. Widespread association between the erico  
 Urakawa H, El Fantroussi S, Smidt H, Smoot JC, Tribou EH, Kelly JJ, Noble PA, S  
 Urakawa H, Noble PA, El Fantroussi S, Kelly JJ, Stahl DA. 2002. Single-base-pair c

p/cd  
 p/cd  
 j  
 p/cd  
  
 p/cd  
 p  
 p  
 p/cd  
  
  
 cd  
  
 p  
 cd  
 p/cd  
 cd  
 p/cd  
 p/cd  
 p/cd  
  
 cd x  
 p/cd  
 p/cd  
 p/cd x  
 cd x  
 p/cd  
 cd  
 p/cd  
 p/cd  
 p/cd  
  
 cd x  
 cd x  
 p/cd  
 p  
 p  
  
 cd  
 p  
 j

x

x

x

Urban A, Neuner-Plattner I, Krisai-Greilhuber I, Haselwandter K. 2004. Molecular s

Urban A, Puschenreiter M, S Austria serpent **ECM: Cantharellus lutescens**, C

Urban AU, **Sebacina spp.** ülemine väga krobeline mantlikiht ja alumised **parv Seba**

U'Ren JM, Dalling JW, Gallery R, Maddison DR, Davis EC, Gibson CM, Arnold A

U'Ren JM, Lutzoni F, Miadlikowska J, Laetsch AD, Arnold EA. 2012. Host and ge

U'ren JM, Lutzonia F, Miadlikowska J, Arnold AE. 2010. Community analysis reve

Uri V, Tullus H, Lõhmus K. 2002. Biomass production and nutrient accumulation in

Ursic M, Peterson RL, Husb **2-3 a istanduse m Wilcoxina, punaneAsco, Hebeloma,**

Ursic M, Pe **Phialophora finlandia** (ist: EEMR, sünt ECM; kollakas, EMH hüäl + tug

Usuki F, Abe JP, Kakishima M. 2003. Diversity of ericoid mycorrhizal fungi isolate

Usuki F, Narisawa K. 2005. Formation of structures resembling ericoid mycorrhizas

Vaario L-M, Fritze H, Spetz P, Heinonsalo J, I Tricholoma matsutake dominen

Vaario L-M, Guerin-Laguette A, Gill WM, Lapeyrie F, Suzuki K. 2000. Only two w

Vaario L-M, Guerin-Laguette A, Matsushita N, Suzuki K, Lapeyrie F. 2002. Saprob

Vaario L-M, Pennanen T, Sarjala T, Savonen E-M, Heinonsalo J. 2010. Ectomycorr

Vaario L-M, Tervonen A, H; **Picea abies tait samad: Thel terr, Amphinema**

Vainio EJ, Hantula J. 2000. Direct analysis of wood-inhabiting fungi using denaturin

Vajda V, McLoughlin S. 2003. Fungal Proliferation at the Cretaceous-Tertiary Boun

Valencia R, Condit R, Foster RB, Romoleroux K, Villa Munos G, Svenning J-C, M; **M**

Valencia R, Foster RB, Villa G, Condit R, Svenning JC, Hernandez C, Romoleroux

Valentine LL, Fiedler TL, H; **Quercus garryana Cenococcum, Tomentella sp.** Tuber s

Valentini A, Pompanon F, Taberlet P. 2009. DNA barcoding for ecologists. Trends I

Valenzuela E, Moreno G, Garnica S, Godoy R, Ramirez C. 1999. Mycose **Tsili No**

Valinsky L, Della Vedova G **põllumullas: mikroarray: ainult kott-ja kandseened**

Vamosi SM, Heard SB, Vamosi C, Webb CO. 2009. Emerging patterns in the comp

Van Breemen N, Finlay R, Lundström U, Jongmans AG, Giesler R, Olsson M. 2000.

van der Berg C, Goldman DH, Freudenstein JV, Pridgeon AM, Cameron KM, Chas

van der Gast CJ, Ager D, Lilley AK. 2008. Temporal scaling of bacterial taxa is infli

van der Gast CJ. 2008. Islands shaping thought in microbial ecology. Adv. Appl. Mi

van der Heijden EW, de Vric **Salix; vs kk-tingii Laccaria, Hebeloma, Inocy Salix; vs**

van der Heijden EW, Kuyper TW. 2001. Does origin of mycorrhizal fungus or myco

van der Heijden EW, Kuyper TW. 2003. Ecological strategies of ectomycorrhizal fu

van der Heijden EW, Vosatk **vs AM diversiteet: Salix; vs kk-tingimused, vs aastaaja**

Van der Heijden EW. 2001. Differential benefits of arbuscular mycorrhizal and ecto

van der Heijden MGA, Bardgett RD, van Straalen NM. 2008. The unseen majority:

van der Heijden MGA, Boller T, Wiemken A, Sanders IR. 1998. Different arbuscul

van der Heijden MGA, Horton TR. 2009. Socialism in soil? The importance of myc

van der Heijden MGA, Kliro **AM diversiteet t**õstab taimede BDD, biomassi, P sisald

van der Heijden MGA, Streitwolf-Engel R, Riedl R, Siegrist S, Neudecker A, Ineich

van der Heijden MGA, Wiemken A, Sanders IR. 2003. Different arbuscular mycorrl

van der Putten WH, Klironomos JN, Wardle DA. 2007. Microbial ecology of biolog

van der Putten WH, Kowalchuk GA, Brinkman EP, Doodeman GTA, van der Kaaij

van der Putten WH, Macel M, Visser ME. 2010. Predicting species distribution and

Van der Putten WH, Vet LEM, Harvey JA, Wäckers FL. 2001. Linking above-and b

van der Putten WH, Bardgett RD, de Ruyter PC, Hol WHG, Meyer KM, Bezemer T

van Driel KGA, Humbel BM, Verkeleij AJ, Stalpers J, Müller WH, Boekhout T. 20

van Elsas, Turner S, Bailey MJ. 2003. Horizontal gene transfer in the phytosphere. T

Van Geel M, Busschaert P, Honnay O, Lievens B. 2014. Evaluation of six primer pa

van Hees PAW, Godbold DL, Jentschke G, Jones DL. 2003. Impact of ectomycorrh

van Hees PAW, Rosling A, Essen S, Godbold DL, Jones DL, Finlay RD. 2006. Oxa

van Schöll L, Hoffland E, van Breemen N. 2006. Organic anion exudition by ectomy

van Schöll L, Smits MM, Hoffland E. 2006. Ectomycorrhizal weathering of the soil

Van Tuinen D, Jacquot E, Zhao B, Gollotte A, Gianinazzi-Pearson V. 1998. Charac

van Velzen R, Weitschek E, Felici G, Bakker FT. 2012. DNA Barcoding of Recent

Vandenkoornhuysse P, Baldauf SL, Leyval C, Straczek J, Young JPW. 2002. Extensi

Vandenkoornhuysse P, Mahé **13C rikastatud** süsinikuga taimedest RNA ekst

Vandenkoornhuysse P, Ridgway P, Watson IJ, Fitter AH, Young JPW. 2003. Co-exis

Vanderklift MA, Ponsard S. 2003. Sources of variation in consumer-diet d15N enric

Vardavkis E. 1992. Mycorrhizal Endogonaceae and their seasonal variations in a Gr

Väre H, Ohtonen R, Ahonen-Jonnarh U, Tarvainen O, Markkola A-M, Jalkanen R.

Väre H, Vestberg M, Eurola S. 1992. Mycorrhiza and root-associated fung **Teravmä**

Väre H. 1989. Effect of nitrogen on the growth of Suillus variegatus and on mycorrh

Väre H. 1989. Influence of d istandikes **Thelephora**

Väre H. 1989. The mycorrhizal condition of w **esinesid Thelephora, Cenococcum**

Väre H. 1990. Aluminium polyphosphate in the ectomycorrhizal fungus Suillus varie

Varela E, Martinez AT, Martinez MJ. 2000. Southern blot screening for lignin pero

Vares A, Lõhmus K, Truu M, Truu J, Tullus H, Kanal A. 2004. Productivity of black

Varese GC, Gonthier P, Nicolotti P. 2003. Long-term effects on other fungi are stud





cd  
x  
cd  
p  
p/cd

p/cd  
p/cd  
p/cd  
p/cd  
p  
b  
p/cd  
cd

p/cd  
cd

cd

p/cd  
p/cd

cd

p/cd  
j  
p

j  
p/j

p/cd  
p/cd  
p/cd

p/cd  
p/cd  
p  
p  
p/cd

p/cd  
p/cd

Ward BB. 2002. How many bakterite diversiteet: lühiülevaade, Curtis2002 kommer  
Wardle DA et al. 1999. Plant removals in perennial grassland: vegetation dynamics,  
Wardle DA, Bardgett RD, Klironomos JN, Setälä H, van der Putten WH, Wall DH. 2004.  
Wardle DA, Bonner KI, Nicholson KS. 1997. Biodiversity and plant litter: experime  
Wardle DA, Lindahl BD. 2014. Disentangling global soil fungal diversity. Science 3  
Wardle DA, Yeates GW, Barker GM, Bonner KI. 2006. The influence of plant litter  
Wardle DA, Yeates GW, Williamson W, Bonner KI. 2003. The response of a three  
Wardle DA, Zackrisson O, Hörnberg G, Gallet C. 1997. The influence of island area  
Wardle DA. 1999. Is "sampling effect" a problem for experiments investigating biod  
Wardle DA. 2006. the influence of biotic interactions on soil biodiversity. Ecol. Lett  
Wariishi H, Valli K, Gold MH. 1992. Manganese (II) oxidation by manganese perox  
Waring BG, Averill C, Hawkes CV. 2013. Differences in fungal and bacterial physio  
Warren JM, Brooks JR, Meinzer FC, Eberhart JL. 2008. Hydraulic redistribution of  
Warren JM, Brooks JR, Meinzer FC, Eberhart JL. 2008. Hydraulic redistribution of  
Waterman RJ, Bidartondo MI, Stofberg J, Combs JK, Gebauer G, Savolainen V, Ba  
Waterman RJ, Bidartondo MI. 2008. Deception above, deception below: linking pol  
Watling R, Lee SS. 1995. Ectomycorrhizal fungi associated with members Malaisi  
Watling R, Lee SS. 1998. Ectomycorrhizal fungi associated with members Malaisi  
Watling R. 2001. Australian boletes: their diversity and possible origins. Aust. Syst.  
Watling R. 2001. The relationships and possible distributional patterns of boletes in  
Watling R. 2005. Fungal conservation: some impressions -a personal view. Exotic sp  
Watling R. 2006. The sclerodermatoid fungi. Mycoscience 47: 18-24.  
Watve MG, Gangal RM. 1996. Problems in measuring bacterial diversity and a poss  
Webb CO, Ackerly DD, Kembel SW. 2008. Phylocom: Software for the Analysis of  
Webb CO, Ackerly DD, McPeck MA, Donoghue MJ. 2002. Phylogenies and comm  
Webb CO, Cannon CH, Davies SJ. 2008. Ecological organization, biogeography, an  
Webb CO, Gilbert GS, Donoghue MJ. 2006. Phylodiversity-dependent seedling mor  
Webb CO. 2000. Exploring the phylogenetic structure of ecological communities: A  
Weber A, Karst J, Gilbert B, Kimmins JP. 2004. Thuja plicata exclusion in ectomyc  
Weber AT, Pawlowski J. 2013. Can Abundance of Protists Be Inferred from Sequen  
Weber J, Diez J, Selosse M-A, Tagu D, Le Tacon F. 2002. SCAR markers to detect  
Weber MG, Agrawal AA. 2012. Phylogeny, ecology, and the coupling of comparati  
Weden C, Danell E, Camacho FJ, Backlund A. 2004. The population of the hypogea  
Weden C, Danell E, Tibell L. 2005. Species recognition in the truffle genus Tuber-t  
Weden C, Ericsson L, Danell E. 2001. Tryffelnyheter fran Gotland. Svensk Bot. Tid  
Weden C, Pettersson L, Danell E. 2009. Truffle cultivation in Sweden: results from  
Wedin M, Döring H, Gilenstam G. 2004. Saprotrophy and lichenization as options fi  
Wei J, Agerer R. 2011. Two sebacinoid ectomycorrhizae on Chinese pine. Mycorrhiz  
Wei J, Persson H, Humaria, Trichophaea vf woolhopeia, Geopora, Geopora-Tric  
Weiblen GD, Webb CO, Novotny V, Basset Y, Miller SE. 2006. Phylogenetic dispe  
Weidemann HN. 1998. Pavisning av Helvella ektomykorrhiza hos Dryas og Salix  
Weir JR. 1921. Thelephora terrestris, T. fimbriata, and T. caryophyllea on forest t  
Weir JT, Schluter D. 2007. The latitudinal gradient in recent speciation and extinct  
Weiss M, Oberwinkler F. 2001. Phylogenetic relationships within Auriculariales and  
Weiss M, Selosse M-A, Rexer K-H, Urban A, Oberwinkler F. 2004. Sebacinales: a  
Weiss M, Sykora Z, Garnica S, Riess K, Martos F, Krause C, Oberwinkler F, Bau  
Wells JM, Boddy L, Donnelly DP. 1998. Wood decay and phosphorus translocation  
Wells K, Oberwinkler F. 1982. Tremelloscypha gelatinosa, a species of a new fami  
Wells K. 1975. Studies of some Tremellaceae. V. A new genus, Efibulobasidium. M  
Welsh AK, Dawson JO, Gottfried GJ, Hahn D. 2009. Diversity of Frankia in root ne  
Wen Z, Murata M, Xu Z, Ch Pseudotsuga si RuLa, Seb, Tom-thel; spetsiifili  
Wenkart S, Roth-Bejerano N, Mills D, Kagan-Zur V. 2001. Mycorrhizal association  
Went FW. 1973. Rhizomorphs in soil not connected with fungal fruiting bodies. Am  
Werner RA, Brand WA. 2001. Referencing strategies and techniques in stable isotop  
Wesser SD, Armbruster WD. 1991. Species distribution controls across a forest-ste  
Westoby M. 2006. Phylogenetic ecology at world scale, a new fusion between ecol  
Wheeler CT, Tilak M, Scrimgeour CM, Hooker JE, Handley LL. 2000. Effects of sy  
Whigham DF, O'Neill J, McCormick M, Smith C, Rasmussen H, Caldwell B, Danie  
Whipps JM. 2004. Prospects and limitations of mycorrhizas in biocontrol of root pat  
Whittaker RJ, Grogan DW, Taylor JW. 2003. Geographic barriers isolate endemic pe  
Whitby CB, Hall G, Pickup R, Saunders JR, Ineson P, Parekh NR, McCarthy A. 200  
White JR, Navlakha S, Nagarajan N, Ghodsi M-R, Kingsford C, Pop M. 2010. Alig  
White MM, James TY, O'Donnell K, Cafaro MJ, Tanabe Y, Sugiyama J. 2006. Phyl  
White P. 2006. The 20th NZ fungal foray, Westport. Available at: www.. NZL for  
Whitlock MC, McPeck MA, Rauscher MD, Rieseberg L, Moore AJ. 2010. Data arch  
Whitlock MC. 2011. Data archiving in ecology and evolution: best practices. Trends  
Whittaker RH, 1975. Communities and Ecosystems. 2nd edn. Macmillan, New York  
Whittaker RJ. 2010. Mega-analyses and mega-mistakes: calling time on meta-analys



n  
p/cd  
  
cd  
p/cd  
  
cd  
p  
  
p  
  
p  
p  
cd  
cd  
p/cd  
  
cd  
p/cd  
  
j  
  
p/cd  
p/cd  
  
p/cd  
cd  
  
p/cd  
  
p/cd  
  
p  
  
cd  
p/cd  
p/cd  
  
p/cd  
cd  
cd  
  
p/cd  
p/cd  
p/cd  
  
p/cd

x

Wicklow DT. 1979. Competitive hierarchy in post-fire Ascomycetes. *Mycologia* 71: 1-10.

Wiedmer E. *Melanogaster broomeianus* lepal

Wiegand T, Gunatilleke CSV, Gunatilleke IAUN, Huth A. 2007. How individual sp

Wiegand T, Huyh A, Getzin S, Wang X, Hao Z, Gunatilleke CVS, Gunatilleke IAU

Wiemers M, Fiedler K. 2007. Does the DNA barcoding gap exist? – a case study in

Wiemken V, Boller T. 2002. Ectomycorrhiza: gene expression, metabolism and the

Wiens JJ, Ackerly DD, Allen AP, Anacker BL, Buckley LB, Cornell HV, Damscher

Wiens JJ, Donoghue MJ. 2004. Historical biogeography, ecology and species richne

Wiens JJ, Graham CH. 2005. Niche conservatism: integrating evolution, ecology and

Wiklund K, Nilsson L-O, Jacobsson S. 1995. Effect of irrigation, fertilizati muutub k

Wikström N, Savolainen V, Chase MW. 2001. Evolution of the angiosperms: calibr

Wilberforce EM, Boddy L, Griffiths R, Griffith GW. 2003. Agricultural managemen

Wilcox HE, Wilcoxina: mitut tüüpi klamüdosp kultuuris, ektendoMR klamüdospoor

Wilcox HE, 2 eritüüpi ektendomükoriisat -toen. Wilcoxina ja phialophora

Wilcox HE, ektendomükoriisa, toen Phialophora -rakusisesed hüüfid tungisid isegi p

Wilcox HE, Phialocephala dimorphospora (pms rakkudevah H, paiguti paks mantel)

Wilcox HE. 1971. Morphology of Ectendomycorrhizae in Pinus resinosa. In: Hacs

Wilde SA. 1971. Studies of Mycorrhizae in Socialist Republics of Europe. In: Hacs

Wilkinson A, Alexander IJ, Johnson D. 2011. Species richness of ectomycorrhizal h

Wilkinson A, Solan M, Taylor AFS, Alexander IJ, Johnson D. 2010. Intraspecific di

Wilkinson DM. 1998. Mycorrhizal fungi and Quaternary plant migrations. *Glob. Ecol*

Wilkinson DM. 1998. The evolutionary ecology of mycorrhizal networks. *Oikos* 82: 1-10.

Wilkinson DM. 1999. Mycorrhizal networks are best explained by plurality of mech

Wilkinson DM. 2001. Horizontally acquired mutualisms, an unsolved problem in ec

Wilkinson DM. 2001. Mycorrhizal evolution. *Trends Ecol. Evol.* 16: 64-65.

Wilkinson DM. 2001. What is the upper size limit for cosmopolitan distribution in fr

Wilkinson HT. 1987. Association of Trechispora alnicola with yellow ring disease o

Wilkinson SC et al. 2002. PI laguneval kuuse ja männiokastel. Männil domin seenel

Will KW, Rubinoff D. 2004. Myth of the molecule: DNA barcodes for species cann

Willerslev E, Davison J, Moora M, Zobel M, Coissac E, Edwards ME et al. 2014. F

Williams AF, Chambers SM, Davies PW, McLean CB, Cairney JW. 2004. Molec

Williams END, Todd NK, Rayner ADM. 1981. Spatial development of populations

Williams PG, Roser DJ, Seppelt RD. 1994. Mycorrhizas of hepatics in continental A

Williams SE. 1979. Vesicular-arbuscular mycorrhizae associated with Actinomycet

Willig MR, Kaufman DM, Stevens RD. 2003. Latitudinal gradients of biodiversity. J

Wills C and 37 others. Nonrandom processes maintain diversity in tropical forests. S

Wilmé L, Goodman SM, Ganzhorn JU. 2006. Biogeographic evolution of Madagasc

Wilson AD. 1991. Somatic incompatibility in dikaryotic-monokaryotic and dikaryoti

Wilson AW, Binder M, Hibbett DS. 2012. Diversity and evolution of ectomycorrhiz

Wilson AW, Binder M, Hibbett DS. 2012. Effects of gasteroid fruiting body morph

Wilson AW Calostoma cinnabarinum on pisolithuse ja sclerodermaga ühe

Wilson BJ, Addy HD, Tsune Kanada arktikas paljudel EcM ja AM taimedel: dominl

Wilson KH, Wilson WJ, Radosevich JL, DeSantis TZ, Viswanathan VS, Kuczmar

Wilson MJ, Certini G, Campbell CD, Anderson IC, Hillier S. 2008. Does the prefer

Wilson PG, O'Brien MM, Gadek PA, Quinn CJ. 2001. Myrtaceae revisited: a reass

Wilson SD. 1993. Belowground competition in forest and prairie. *Oikos* 68: 146-150

Wilson WJ, Strout CL, DeSantis TZ, Stilwell JS, Carrano AV. 2002. Sequence-spec

Wingate L, Ogée J, Burrett R, Bosc A, Devaux M, Grace J, Loustau D, Gessler A. 2

Wingfield MJ, Slippers B, Roux J, Wingfield BD. 2001. Worldwide movement of ec

Wingler A, Wallenda T, Hampp R. 1996. Mycorrhiza formation on Norway spruce (

Winka K. 2000. Phylogenetic relationships within the Ascomycota based on 18S rD

Winkworth RC, Wagstaff SJ, Glenn D, Lockhart PJ. 2002. Plant dispersal N.E.W.!

Winter K-U, Becker A, Münster T, Kim JT, Saedler H, Theissen G. 1999. MADS-b

Winther JL, Friedman WE. 2008. Arbuscular mycorrhizal associations in Lycopodia

Wipfl D. 1997. Polymorphismes protéique et génomique au sein des Morchellaceae -

Wipfli MS, Deal RL, Hennon PE, Gomi T, Orlikowska E, LeSage C, D'Amore DV.

Wirsle SGR, Leibinger W, E pilliroo juurtes kultuur + sekv ITS; juurtes suurim BD I

Wirsle SGR. 2004. Homogei AM mol BD pilliroo juurtes: kas praimereid nii tava-G

Wisn MS, Pottier J, Kissling WD, Pellissier L, Lenoir J, Damgaard C, Dormann CF,

Withington JM, Reich PB, Oleksyn J, Eissenstat DM. 2006. Comparisons of structu

Wojciechowski MF, Lavin M, Sanderson MJ. 2004. A phylogeny of legumes (Legu

Wojciechowski MF. 2003. Reconstructing the phylogeny of legumes.. In: Klitgaard

Wolfe BE, Klironomos JN. 2005. Breaking new ground: soil communities and exotic

Wolfe BE, Kuo M, Pringle A. 2012. Amanita thiersii is a saprotrophic fungus expar

Wolfe BE, Pringle A. 2012. Geographically structured host specificity is caused by t

Wolfe BE, Richard F, Cross Amanita phalloides invad N-Am: VK enamasti

Wolfe BE, Rodgers VL, Stinson KA, Pringle A. 2008. The invasive plant Alliaria pe

 p  
 p  
 p/cd  
  
 1  
 cd  
 j  
 p/cd  
  
 p/cd  
 p/cd  
 p/cd  
  
 p/cd  
  
 p/cd  
  
 cd  
 p  
  
 cd  
 cd  
  
 cd  
 cd  
 p/cd  
 cd  
  
 cd  
 p/cd  
  
 cd  
  
 p/cd  
 p/cd  
 p/cd  
 p/cd  
  
 p/cd  
  
 p/cd  
 p/cd  
  
 p/cd  
  
 p  
 p

Wolfe BE, Tulloss RE, Pringle A. 2012. The irreversible loss of a decomposition pa  
 Wolfe CB, Bougher NL. 1993. Systematics, mycogeography, and evolutionary histo  
 Wöllecke J. paljude uute k N väetamine: p eri aastaegadel eri dominandid  
 Wolpert J. 1910. Die Mycorrhizen von *Alnus alnobetula*. Flora 100: 60-68.  
 Womack AM, Bohannan BJM, Green JL. 2010. Biodiversity and biogeography of th  
 Won H, Renner SS. 2006. Dating dispersal and radiation in the gymnosperm *Gnetum*.  
 Wong KKY *Laccaria bicolor*: eritüvede erinevused  
 Woodcock S, Curtis TP, Head IM, Lunn M, Sloan WT. 2006. Taxa-area relationship  
 Woodruff DS. 2003. Neogene marine transgressions, palaeogeography and biogeogr  
 Worrall JJ, Anagnost SE, Zabel RA. 1997. Comparison of wood decay among dive  
 Wright JE. 2005. Checklist of the mycobiota of Iguazú Natinal Park (Misi: ARG Ig  
 Wright MM, Cross R, Cousens RD, May TW, McLean CB. 2010. Taxonomic and f  
 Wright S, Keeling J, Gillman L. 2006. The road from Santa Rosalia: A faster tempo  
 Wright SD, Yong CG, Dawson JW, Whittaker DJ, Gardner RC. 2000. Riding the ic  
 Wright SHA, Berch SM, Ber Tsuga; vs väet enim Cortinarius spp (liigiliselt  
 Wu B, Hogetsu T, Isobe K, Ishii R. 2007. Community structure of arbuscular mycor  
 Wu B, Lian C, Hogetsu T. 2002. Development of microsatellite markers in white bir  
 Wu B, Maruyama H, Teramoto M, Hogetsu T. 2012. Structural and functional intera  
 Wu B, Nara K, Hogetsu T. 1 ECM seente võitlus juurel  
 Wu B, Nara K, Hogetsu T. 2001. Can 14C labeled photosynthetic products move be  
 Wu B, Nara K, Hogetsu T. 2002. Spatiotemporal transfer of carbon-14-labelled pho  
 Wu B, Nara K, Hogetsu T. 2004. Genetic structure of *Cenococcum geophilum* popu  
 Wu B, Watanabe I, Hayatsu M, Nioh I. 1999. Effect of ectomycorrhizae on the grov  
 Wu C-G, Lin S-J. 1997. Endogonales in Taiwan: A new genus with unizygosporic sp  
 Wu J, Ma H, Han S, Zhu Y, Jin H, Liang J, Liu L, Xu J. 2010. Rhizoctonia fungi enl  
 Wu L, Thompson DK, Li G, Hurt RA, Tiedje JM, Zhou J. 2001. Development and e  
 Wu Q, Mueller GM. 1997. Biogeographic relationships between macrofungi of tem  
 Wu Q-W, Mueller GM, Lutzoni FM, Huang Y-Q, Quo S-Y. 2000. Phylogenetic and  
 Wu T, Kabir Z, Koide RT. 2005. A possible role for saprotrophic microfungi in the l  
 Wu T, Sharda JN, Koide RT. 2003. Exploring interactions between saprotrophic mic  
 Wu YT, Wubet T, Trogisch : mullaseened CHN vanuseras: vanusega seenel  
 Wu Z, Tsumura Y, Blomquist G, Wang X-R. 2003. 18S rRNA gene variation among  
 Wubet T, Kottke I, Teketay D, Oberwinkler F. 2003. Mycorrhizal status of indigen  
 Wubet T, Weiss M, Kottke I, Oberwinkler F. 2006. Two threatened coexisting indig  
 Wubet T, Weiss M, Kottke I, Teketay D, Oberwinkler F. 2003. Molecular diversity  
 Wurzbürger x luite-vs segamänn n/a  
 Wurzbürger N, Bledsoe C. 2 luite-vs segamännik,  
 Wurzbürger N, Hartshorn A: raba vs mets. Me metsas pigem kuusel ja kuusel pms C  
 Wurzbürger N, Hendrick RL. 2009. Plant litter chemistry and mycorrhizal roots pro  
 Wurzbürger N, Higgins BP, Hendrick RL. 2012. Ericoid mycorrhizal root fungi and  
 Xiang Q-Y, Soltis DE. 2001. Dispersal-vicariance analyses of intercontinental disj  
 Xiao G, Berch SM. 1996. Diversity and abundance of ericoid mycorrhizal fungi of C  
 Xie J, Yanping Y, Jiang D, Li G, Huang J, Li B, Hsiang T, Peng Y. 2008. Intergene  
 Xiong S, Nilsson C. 1999. The effects of plant litter on vegetation: a meta-analysis. l  
 Xu J, Sha T, Li Y-C, Zhao Z-W, Yang ZL. 2008. Recombination and genetic differe  
 Xu LH, Ravnskov S, Nicolai juure- vs risosf vs mulla seente BD hernel: juur  
 Xu X, Thornton P, Post WM. 2013. A global analysis of soil microbial biomass cart  
 Ya T, Ren Z. 1996. Geographical distribution of *Tilia* L. Acta Phytotaxon. Sin. 34: 2  
 Yagame T, Orihara T, Selosse M-A, Yamato M, Iwase K. 2012. Mixotrophy of *Plat*  
 Yagame T, Yamato M, Suzuki A, Iwase K. 2008. Ceratobasidiaceae mycorrhizal fu  
 Yagame T, Yamato M. 2013. Mycoheterotrophic growth of *Cephalanthera falcata* (C  
 Yamada A, *Tricholoma matsutake*  
 Yamada A, xxx  
 Yamada A, xxx 2\*64 subproovi; vs viljakehade asetustumuster xxx, 3a,  
 Yamada A, Kitamura D, Setoguchi M, Matsuda Y, Hashimoto Y, Matushita N, Fuk  
 Yamada A, *Tricholoma matsutake*  
 Yamada A, Ogura T, Ohmasa M. 2001. Cultivation of mushrooms of edible ectomy  
 Yamada A, jaapani söögiseened: kirjldused  
 Yamanaka T, Li C-Y, Bormann BT, Okabe H. 2003. Tripartite associations in an al  
 Yamanaka T. 1999. Utilization of inorganic and organic nitrogen in pure cultures by  
 Yamasaki SH, Fyles JW, Egger KN, Titus BD. 1998. The effect of *Kalmia angustifl*  
 Yamashita S, Hattori T, Momose K, Nakagawa M, Aiba M, Nakashizuka T. 2008. I  
 Yamato M, Iwase K. 2008. Introduction of asymbiotically propagated seedlings of C  
 Yamato M, Iwase K. 2008. Introduction of asymbiotically propagated seedlings of C  
 Yamaya K. 1968. On the influence of alder (*Alnus inokumae*) on soil properties in n  
 Yang CY, Wilcox HE. 1984. An E-strain ectendomycorrhiza formed by a new speci  
 Yang H, Zang Y, Yuan Y, Tang J, Chen X. 2012. Selectivity by host plants affects t

cd  
p/cd  
y  
(j)  
p/cd  
p/cd  
p/cd  
p  
cd  
p/cd  
cd  
p/cd  
j  
p/cd  
p  
cd  
cd  
cd  
p/cd  
p  
p/cd  
cd  
p/cd

Yang Y, Gao Y, Wang S, Xu D, Yu H, Wu L, Lin Q, Hu Y, Li X, He Z, Deng Y, Zl  
Yang Y, Qiu Q, Yang Z, Hu Z, Tam NF-Y, Xin G. 2010. Arbuscular mycorrhizal fu  
Yang YH, Speed T. 2002. Design issues for cDNA microarray experiments. Nature  
Yang ZL, Matheny PB, Ge ZW, Slot JC, Hibbett DS. 2005. New Asian species of tl  
Yang ZL, Trappe JM, Binder M, Sanmee R, Lumyong P, Lumyong S. 2006. The sec  
Yang, G, Cl xxx, vulkaanipurskest r-strateegid vulkaanilisel pinnasel: su  
Yao F, Vik U, Brysting AK, Bistorta vivipara; järsakul vs nõgu: kooslustes :  
Yao H, Song J, Liu C, Luo K, Han J, Li Y, Pang X, Xu H, Zhu Y, Xiao P, Chen S. 2  
Yao Y.-J, Pegler DN, Young TWK. 1994. New species in *Endogone* (Endogonales  
Yao Y-J, Pegler DN, Young TWK. 1995. Youngiomyces, a new genus in Endogona  
Yao Y-J, Spooner BM. 1996. *Oviascoma*, a new genus of Otideaceae. My **Oviascon**  
Yarwood SA, Myrold DD, F **mullaseened vs**. Girdling: kontrollis EcM seene  
Yen AC, Olmstead R. 2000. Molecular systematics of Cyperaceae tribe Cariceae ba  
Yergeau E, Schoondermark-Stolk SA, Brodie EL, Déjean S, DeSantis TZ, Goncalve  
Yilmaz P, Kottmann R, Field D, Knight R, Cole JR, Amaral-Zettler L. 2011. Minimu  
Yomyart S, Piapukiew J, Wu B, Hogetsu T, Sihanonth P (2007) Community structur  
Yoo K-O, Wen J. 2002. Phylogeny and biogeography of *Carpinus* and subfamily C  
Yorou NS, Agerer R. 2007. *Tomentella furcata*, a new species from Benin (West A  
Yorou NS, Agerer R. 2007. Type studies of three tomentelloid species (Basidiomyc  
Yorou NS, Kõljalg U, Sinsin B, Agerer R. 2007. Studies in African theleporoid fun  
Young BW, Massicotte HB, Tackaberry LE, Baldwin QF, Egger KN. 2002. *Monotr*  
Young HE. 1937. *Rhizopogon luteolus*, a mycorrhizal fungus of *Pinus*. Forestry 11:  
Young YPW. 2005. The phylogeny and evolution of nitrogenases. In: Palacios R, N  
Yu T, Nassuth A, Peterson RL. 2001. Characterization of the interaction between th  
Yu TE, Egg **ektendomükoriis: ektendomükoriisa**: Wilcoxina, Sphaerosporella, Phialo  
Yu Y, Breitbart M, McNairnie P, Rohwer F. 2006. FastGroupII: A web-based bioin  
Yu Y, Breitbart M, McNairnie P, Rohwer F. 2006. FastGroupII: A web-based bioin  
Yuan L, Yankg ZL, Li S-Y, Hu H, Huang J-L. 2010. Mycorrhizal specificity, prefer  
Yuan Z-L, Zhang C-L, Lin F-C, Kubicek C. 2010. Identity, diversity and molecular j  
Yuan ZY, Chen HYH, Reich PB. 2011. Global-scale latitudinal patterns of plant fin  
Yuan ZY, Chen HYH, Reich PB. 2011. Global-scale latitudinal patterns of plant fin  
Yue JC, Clayton MK. 2005. A similarity measure based on species proportions. Cor  
Yue JC, Clayton MK. 2005. A similarity measure based on species proportions. Cor  
Yukawa T, Ogura-Tsujita Y, Shefferson RP, Yokoyama J. 2009. Mycorrhizal divers  
Yuwa-Amornpitak T, Vichit: **Tai: 8 proovial Tomentella, Scleroderma-pisol**,  
Zabarovsky ER, Petrenko L, Protopopov A et al. 2003. Restriction site tagged (RST  
Zachow C, Berg C, Müller F **risosfääri seene**kooslus Tenerifel: enim mõjutat  
Zafar U, Houlden A, Robson polyuretaani lagunemisel eri temperatuuridel. 2  
Zak B, Marx DH. 1964. Isolation of mycorrhizal fungi from roots of individual slash  
Zak B. 1969. Characterization and classification of mycorrhizae of Douglas-fir. I. P  
Zak B. 1974. *Cortinarius zakii* maasikapuul: ektendomükoriisa  
Zak B. 1974. leesikas + mfg seened sh kuuserisikas (Lactarius sanguifluus), Rhizopo  
Zak B. 1974. **arbutoidse mükoriisa sünt puhaskultuurist: Thel terrestris, Pil**  
Zak DR, Holmes WE, White **mikroobide PLFA** mitmekesisus sõltub taimede biomas  
Zak JC, Rabatin SC. 1997. Organization and description of fungal Commu **seente dr**  
Zak JC, Whitford WG. 1986. The occurrence of a Hypogeous Ascomycete in the N  
Zak JC, Wicklow DT. 1979. Structure and composition of a post-fire ascomycete co  
Zambonelli **Tuber albidum ja Tuber aestivum** sarapuul  
Zambonelli A, Branzanti MB. 1990. Mycorrhizal synthesis between *Tuber albidum* v  
Zambonelli **Tuber vs Hebeloma** sinapizans, Laccaria, kontaminandid  
Zambonelli A, Iotti M. 2001. Effects of fungicides on *Tuber borchii* and *Hebeloma s*  
Zangaro W, Bononi WLR, Trufen SB. 2000. Mycorrhizal dependency, inoculum pot  
Zangaro W, Nisizaki SMA, Domingos JCB, Nakano EM. 2003. Mycorrhizal respon  
Zanis MJ, Soltis DE, Soltis PS, Mathews S, Donoghue MJ. 2002. The root of the an  
Zanne AE, Tank DC, Cornwell WK, Eastman JM, Smith SA, FitzJohn RG et al. 201  
Zar JH. 1999. Biostatistical analysis. Upper Saddle River, New Jersey, USA: Prenti  
Zare R, Gams W. 2008. A revision of the *Verticillium fungicola* species complex ar  
Zeller B, Bréchet C, Maurice J-C, Le Tacon F. 2007. 13C and 15N isotopic fraction  
Zeller B, Bréchet C, Maurice J-C, Le Tacon F. 2008. Saprotrophic versus symbiotic  
Zelmer CD, **Corallorhiza trifida** juurest isoleeritud kandseen mood EcM männil. Uue  
Zelmer CD, Cuthbertson L, Currah RS. 1996. Fungi associated with terrestrial orch  
Zeng NK, Cai Q, Yang ZL. 2012. Cornerobolus, a new genus to accommodate the  
Zeppa S, Si: **2 trühvli liigi sünteessitud EcM morfoomeetria** on erinev pärnal. Seene ko  
Zerova MY, Rozhenko HL. 1966. *Entoloma erophilum* and *E. sericeum* - mycorrhi  
Zerova MY. 1950. *Scleroderma verrucosum* - mikoriznyi grib drevesnykh porod v :  
Zerova MY **Inocybe serotina** tuvastamine pajul  
Zervakis GI, Moncalvo J-M, Vilgalys R. 2004. Molecular phylogeny, biogeography

cd  
 b  
 p/cd  
 p/cd  
 (cd)  
 cd  
 p/cd  
 j  
 p/cd  
 p  
 p/cd  
 cd  
 cd  
 cd  
 p/cd  
 cd  
 cd  
 cd  
 2012 1  
 j  
 p  
 cd  
 p/cd  
 p/cd  
 p/cd  
 cd  
 p  
 p  
 p

x

x

x

x

Zervakis GI, Venturella G, Papadopoulou K. 2001. Genetic polymorphism and taxon

Zhan J, McDonald BA. 2005. Analytical and experimental methods for estimating p

Zhan J, Pettway J, McDonald BA. 2003. The global genetic structure of the wheat p

Zhang B-C, Minter DW. 1989. *Gymnohydnotrya*: a new hypogeous ascomycete gen

Zhang C, Yin L, Dai S. 2009. Diversity of root-associated fungal endophytes in *Rho*

Zhang D, Hui D, Luo Y, Zhou G. 2008. Rates of litter decomposition in terrestrial e

Zhang D-X, Hewitt GM. 2003. Nuclear DNA analyses in genetic studies of populati

Zhang D-Y, Lin K, Hanski I. 2004. Coexistence of cryptic species. *Ecol. Lett.* 7: 16:

Zhang J, Taniguchi T, Taten *Quercus* CHN: tom-thel, sebacina

Zhang L, Yang J, Yang Z. 2004. Molecular phylogeny of eastern Asian species of *A*

Zhang N, Blackwell M. 2001. Molecular phylogeny of dogwood anthracnose fungus

Zhang N, Castlebury LA, Miller AN, Huhndorf S, Scoch CL, Seifert KA, Rossman .

Zhang Y-H, Zhuang W-Y. 2004. Phylogenetic relationships of some members in the

Zhao Q-F, Wang G, Li Q-X, Ma S-R, Cui Y, Grillo M. 2006. Genetic diversity of fi

Zhao XR, Lin Q, Brookes PC. 2005. Does soil ergosterol concentration provide a re

Zheng D, Alm EW, Stahl DA, Raskin L. 1996. Characterization of universal small-s

Zhou D, Hyde KD. 2001. Host-specificity, host-exclusivity, and host-recurrence in s

Zhou J, Bruns MA, Tiedje JM. 1996. DNA recovery from soils of diverse compositi

Zhou J, Deng Y, Luo F, He Z, Tu Q, Zhi X. 2010. Functional molecular ecological r

Zhou J, Deng Y, Luo F, He Z, Yang Y. 2011. Phylogenetic molecular ecological net

Zhou J, Kang S, Schadt CW, Garten CT. 2008. Spatial scaling of functional gene div

Zhou J, Thompson DK. 2002. Challenges in applying microarrays to environmental :

Zhou J, Xia B, Huang H, Pal *bakterid mullaprophilis*: 18S RFLP+sekv. Ülakhiris liikic

Zhou J, Xia B, Treves DS, Wu L-Y, Marsh TL, O'Neill RV, Palumbo AV, Tiedje JI

Zhou J. 2003. Microarrays for bacterial detection and microbial community analysis

Zhou LW, Tedersoo L. 2012. *Coltricia australica* sp. nov. (Hymenochaetales, Basid

Zhou M, Sharik TL. 1997. Ectomycorrhizal associations of northern red oak (*Quercu*

Zhou Z, Hogetsu T. 2002. *Stropharia mellea* *Suillus grevillei* viljakkehade all: suur vari

Zhou Z, Miwa M, Hogetsu T. 1999. Analysis of genetic structure of a *Suillus* *Suillus gr*

Zhou Z, Miwa M, Hogetsu T. 2000. Genet distribution of ectomycorrhizal fungus *Su*

Zhou Z, Miwa M, Hogetsu T. 2001. Polymorphism of simple sequence repeats reve

Zhou Z, Miwa M, Matsuda Y, Hogetsu T. 2001. Spatial distribution of subterranean

Zhu GS, Yu ZN, Gui Y, Liu ZY. 2008. A novel technique for isolating orchid mycor

Zhu H, Mallik AU. 1994. Interactions between *Kalmia* and black spruce: isolation a

Zhu Y-G, Miller RM. 2003. Carbon cycling by arbuscular mycorrhizal fungi in soil-

Ziegler H, Trimborn P. 2000. Typen der Photosynthetischen CO<sub>2</sub>-Fixierung bei *Lan*

Zijlstra JD, van't Hof P, Baar J, Verkley GJM. 2005. Diversity of symbiotic root end

Zimmer K, Hynson NA, Gebauer G, Allen EB, Allen MF, Read DJ. 2007. Wide geoc

Zimmer K, Meyer C, Gebauer G. 2008. The ectomycorrhizal specialist orchid *Cora*

Zimmermann K, Mannhalter JW. 1996. Technical aspects of quantitative comparativ

Zinger L, Amaral-Zettler LA, Fuhrman JA, Horner-Devine MC, Huse SM. 2011. Gl

Zinger L, Coissac E, Choler *seeded Alpimullas*: ITS vs LSU (*viletsam resol*

Zinger L, Gobet A, Pommier *veeorganismide* kooslused: ülevaade metoodik

Zinke PJ. 1962. The pattern of influence of individual forest trees on soil properties.

Zobel M, Öpik M, Moora M, Pärtel M. 2006. *Biodiversity and ecosystem functionir*

Zobel M, Otsus M, Liira J, Moora M, Möls T. 2000. Is small-scale species richness

Zobel M, Suurkask M, Rosen E, Pärtel M. 1996. The dynamics of species richness i

Zobel M. 1992. *Plant species* coexistence -the role of historical, evolutionary and ec



ribosomal DNA Large Subunit (LSU) and Internal Transcribed Spacer 2 (ITS2) in DNA barcoding of Collembola. Eur. J. Soil. Biol. 69: 1-7.

r choice on characterization of orchid mycorrhizal communities using 454 pyrosequencing. Mol. Ecol. Res. 14: 679-699.

and F, Abvarenkov K. 2015. Analytical biases in microbial diversity studies. Science (in press).

rs. 2005. Genome sequencing in open fabricated high density picoliter reactors. Nature 437: 376-380. **1. artikkel** 454 pürosekv-st. Teeb vigu enamasti homopolüü

er AK, Jumpponen A. 2015. Scraping the bottom of the barrel: are rare high-throughput sequences arti **13-19% NGS on artefactid ja 27-54% potentsiaalselt artefa**

from 16S rRNA sequences produced by highly parallel pyrosequencers. Nucl. Ac. Res. 2008: 1-11 **16S RDNA**s sobivaim jupp 454 jaoks

. The widely used small subunit 18S rDNA molecule greatly underestimates true **18S ei suuda erist** **18S ei s** **18S ei suuda** eristada meiofauna liike nii hästi kui

biotic on the human gut microbiota, as revealed by deep 16S rRNA sequencing. PLoS Biol. 6: e280. **18S rDNA**: bakteritel täispikal sekventsil parem resolutsioo

ssment of estuarine sediments by pyrosequencing eukaryotic ribosomal DNA. Front. Ecol. Environ. 8 **18S setete** meiofauna 454ga. All18SF ja ALL18SR praime

RNA genes requires copy number correction to accurately reflect the effects of management practices **454 - 18S** nematoodidele; soovib korrekteerida rRNA koop

ma preerias ei sõltu stimul kliimamuutustest - mulla soojendamisest. LSU - 454 **454 - LSU** seentele

454 LSU. Juurtes oli palju Actinobacteria. Baktereid juurtes mõjutab sesoonsus, seeni n **454 - LSU** seentele ja **16S** bakteritele

girikkam kui alakülil lamatüvedel arv eostega levimise tõttu. EcM seeded Amphinema j: **454 ITS2** seeded puutüvedest

SC, Schleper C. 2006. Archaea predominate among ammonia-oxidizing prokaryotes in soils. Nature **454 metatranskriptom**i esimene töö

lega eukarüotidele, SSU kõigile. Univ-praimer on paljude hälvetega ning ei oma piisav **454: eri** Leidsid takson-spetsiifilised thresholdid eri organ

-correction of amplicon pyrosequences using Acacia. Nature Meth. 9: 425-426. **Acacia** noise removal: 100x kiirem kui Ampliconnoise, ent

cular mycorrhizal fungal biodiversity in soil through a land-use gradient using a pyrosequencing appro **AM seeded** eri-taimkattetiüpidel mullast

navahel seotud. ANDMETES on varjatud kasvukohatüübi efekt, mis eriti mõjutab seeni **Amazonias**: seente kooslus ja puude kooslus omavahel seot

arv. Et singletonid ei ole artefaktid; ITS1 454

d Y, Stenlid J, Brandström-Durling M, Clemmensen KE, Lindahl BD. 2012. New **gITS7, fITS7 ja fI** **A-tag** parem 3 x kui T-tag; väga haruldased ampliconid oli

pattern s of bacterial richness and evenness in the NW Mediterranean Sea explored by pyrosequencing bakterid meres: liigirikkus suureneb s RAREFACTION on

analysis of bacterial diversity in a single soil type as affected by management and land use. Soil Biol. E **bakterid** mullas

Camargo FAO, Farmerie WG, Triplett EW. 2007. Pyrosequencing enumerates and contrasts soil micro **bakterid** mullas

in ML. 2007. Microbial population structures in the deep marine biosphere. Science 318: 97-100. **bakterid** ookeanisügavikus

erndl GJ. 2006. Microbial diversity in the deep sea and the underexplored "rare biosphere". Proc. Nat **bakterid** ookeanisügavikus

ontrasted bacterial diversity between oak rhizosphere and surrounding soil. Environ. Microbiol. Rep. **Bakterid** risosfääris vs bulk mullas: v erinev

2010. Shifts in microbial community structure along an ecological gradient of hypersaline soils and sea **bakterid** setetes: vee konts põhjal arv O2 konts on suurim f

oding of plants and animals. Mol. Ecol. 21: 1834-1847. **bakterid** bioinformaatilised probleemid ja lahe bioinformaatilised pi

seasonal dynamics of taxa within Baltic Sea bacterioplankton communities. ISME J. 4: 171-181. **ca 33%** bakterite V6 järjestustest on püro põhjal valesti kla

d H. 2011. CLOTU: an online pipeline for processing and clustering of 454 amplicon reads into OTUs **CLOTU** proge **CLOTU** proge

ding and the cytochrome c oxidase subunit I marker: not a perfect match. Biol. Lett. 10: 20140562. **COI ei sobi** metabarcoding jaoks, kuna praimerite mismatc

ding and the cytochrome c oxidase subunit I marker: not a perfect match. Biol. Lett. 10: 20140562. **COI ei sobi** metabarcoding jaoks, kuna v tugev primeri bia

ndrial cytochrome c oxidase subunit I for marine invertebrates and application in all-taxa biotic survey **COI super-degeneereerunud** praimerid annavad paremaid tu

l. Next-generation DNA barcoding to enhance and accelerate DNA barcode caprute from single specie **COI** triipkoodi sekveneerimine 454 meetodiga. Müned kon

2012. Darwin (Darwin Core standardid terminoloogiale **Darwin Core standardid terminoloogiale**

loiting rank-abundance distributions. Nature Meth. 7: 668-669. **DeNoiser**

kov K, Petri, Rosenblad MA, Nilsson RH. 2011. Metaxa: a software tool for automated detection and domeenid, mitokondrite ja plastiidide automaatne

g exacerbates the potential for biased community diversity comparisons due to variable library sizes. **ei tohi** kasutada Chao, ACE jms. Kui siis kasutada võrdsus

coding: a next-generation sequencing approach for biomonitoring applications using river benthos. PLo **Environmental** barcoding termin; COI jõe putukate uurimi

. 2010. Diversity in a hidden world: potential and limitation of next-generation sequencing for surveys **eukarütoidid** merevees: 18S rDNA pürp vs traditsiooniline

2010. Multiple marker parallel tag environmental DNA sequencing reveals a highly complex eukaryoti **eukarütoidid** merevees: 18S RDNA: V4 ja V9 regioon ann

er M, Carvalho GM, Blaxter ML, Lamshead PJD, Thomas WK. 2010. Ultrasequencing of the meiof: **eukarütoidid** mullas ja vees: 18S, sest COI ei sobi paljudel

sp, Sclerod citrinum domin; rühmadest Bas 44%, AscoM 17%, Unclassif F 11%, Mortic **FRA** mets 6 liigiga

, Albertin W, Durrens P, Sherman DJ, Marullo P, Hittinger CT, Goncalves P, Sampaio JP. 2014. A G **fülogenoomika**: toidutööst **fülogenoomika**: toidutööstuse p

r J, Nekrutenko A, The Galaxy Team. 2009. Windshield splatter analysis with the Galaxy metagenomi **Galaxy** pipeline metagenoomidele: suur puudus referents-a

R, Goudet J, Guex N. 2013. Density-based hierarchical clustering of pyrosequences on a large scale - **hierarhilise** klasterdamise meetod, mis arvestab tihedusfun

dfield EE, Shaw EA, Steenbock C, Bradford MA, Wall DH, Fierer N. 2014. Biogeographic patterns in **HiSeq** prokarütoididele ja eukarütoidile NY Central park

se in next generation amplicon sequencing. New Phytol. In press. **illumina** andmete töötlemine: soovib kasut ainult 1 ahelat. S

SM, Betley J, Fraser L, Bauer M, Gormley N, Gilbert JA, Smith, G, Knight R. 2012. Ultra-high-throu **illumina** MiSeq ja HiSeq kasutamine

gedasem 0-10 cm kui 10-20 cm **illumina** pipeline seentele

of a dual-index sequencing strategy and curation pipeline for analyzing amplicon sequence data on the **illumine** paired end andmetöötlus mothuris. 99% vigadest

, ten Cate JM, Crielaard W. 2008. Pyrosequencing analysis of the oral microflora of healthy adults. J. I **inimese** suuõõnes (saliva, plaque) sadu baktereid

n WE, Metsis **invasiivsed palmid assots väga generalisti** de seentega invas-mullas **invasiiv**sed palmid assots väga generalistide seentega invas

semiconductor chip based sequencing. Electrophoresis 33: 3397-3417. **Ion** Torrent trendid, kvaliteet, kvantiteet

remini kui sealne peremeestaim **ITS** seletab seenekooslust paremini kui LSU; P

**: ruumilist** mustrit ei ole; Mulla P mõj neg ja pH, taimedeBD ja kõrgus!! mõj pos liigiril **ITS1** 454 seentekooslused Sveitsis 700 km2 alal 200 alal: r

ot determined by mineral and chemical differences in serpentine substrates. PLoS ONE 7(9): e44233. **ITS1** ja **ITS2** annavad sarnaseid tulemusi

Kooslused on erinevad ja katustel BD madalam. Illuminal ITS1 pyro **ITS1** seentel illumina masinal

/ 2014. Comparison and validation of some ITS primer pairs useful for fungal m **ITS1F-ITS2** keh **ITS1F-ITS2** kehvem kui ITS3-ITS4 ja ITS86F-ITS4. PCR i

ludes seentekooslusi 1-13 a pärast lisamist. P. gigantea pidas vastu vaid 1 aasta **ITS1F-ITS2** + 454

na liigid asenduvad kiiresti Tyl fibr, Tyl aster ja Athel sp-ga, mis domineerivad lõpuni. **ITS2**: SWE kuusikute vanusereas - BD kasvab, EmH biom

creales ja Mortierellales ja Helotiales. Seente elurikkus ei muutu liustikust kaugenedes, **ITSfull**

, and washing on the diversity of hand surface bacteria. Proc. Natl. Acad. Sci. USA 105: 17994-17999. **käte** baktereid mõjutab inimese sugu, pesemisest möödum

012. Sample richness and genetic diversity as drivers of chimera formation in nSSU metagenetic analy **kimääride** teke on suurem kõrgema Bdg kooslustes ja pigi

abbad D, Highlander SK, Sodergren E, Methé B, DeSantis TZ, Petrosino JF, Knight R, Birren BW. 20 **kimääride** teke: tüüpiliselt SSUs 15-20%; sarnasematel järj

etween replicate 454 pyrosequencing analyses of ectomycorrhizal plant root samples. Mycorrhiza 22: **kloneerimine** vs 454: kloneerides ei tulnud Glomalest , 454

osphere: pyrosequencing errors can lead to artificial inflation of diversity estimates. Environ. Microbio **konkreetse** järjestuse pürosekv korrektsete tulemuste saami

iverse fungal communities in temperate *Quercus macrocarpa* phyllosphere. *New Phytol.* 184: 438-447. **lehe-endof**  
 :tic markers for high-throughput sequencing-based biodiversity assessment in complex planktoni määran loomsele planktonile: COI üldprimerid ei sobi, kuna selge  
 L, Ulrich T. 2012. CREST – classification resources for environmental sequence määramine refere määramine referents-aligneringu vastu. Integreeritud MEC  
 mady M, Knight R, Bushman FD. 2008. The macaque gut microbiome in health, lentiviral infection, a makaagi soolestikus - põhierinevused inimese, makaagi ja  
 V. 2013. Reliable, verifiable and efficient monitoring of biodiversity via metabarcoding. *Ecol. Lett.* 16: metabarcoding termin metagenoteetika kohta; edukalt kasuta  
 :ommunities: towards an integrative approach to the study of global biodiversity. metabarcoding vs metabarcoding vs barcoding: vaja standardiseeritud lähene  
 Shi JZ, Yuan MM, Sherry RA, Li D, Schuur EAG, Chain P, Tiedje JM, Zhou J, Konstantinidis KT. 2012. metagenoom mikroobidel vs mulla soojendamise 2 kraadi  
 sets and why it matters. *ISME J.* 8: 2349-2351. metagenoomide katvuse määramine: vaja statistiliste testid  
 alysis of environmental sequences using MEGAN4. *Genome Res.* 21: 1552-1560. Metagenoomika analüüs MEGANiga: kasutab identifitseer  
 ysis of environmental sequences using MEGAN4. *Genome Res.* 21: 1552-1560. Metagenoomika analüüs MEGANiga: Metagenoomika anal  
 :nomic technologies for complex microbial community analysis: open and closed metagenoomika ja metagenoomika ja metagenoomika ja metagenoomika  
 rative metagenomic and rRNA microbial diversity characterization using archaeal and bacterial synthe metagenoomika vs amplikoni-põhine: 64-spp bakteri mock  
 chitzki B, Richter A, Eberl L, Zechmeister-Bolternstern S, Riedel K. 2012. Who is who in litter decon metagenoomika vs amplikoni-põhine: veeproovid. Metagen  
 id validating sequence identification tags robust to indels. *PLoS ONE* 7: e42543. MID/tag vead: delets pms tootmisel ja indel pyros. Indel tu  
 36-637. mida haruldasem on OTU, seda suurema tõenäosusega arte  
 na metabarcoding of a soil fungal community. *Soil Biol. Biochem.* 65: 128-132. Miseq Illumina: ITS1F1 praimer; ITS1 regioon: 4M sekven  
 cture in pyrosequencing datasets. *PLoS One*: 7: e43093 mock cc mock community: suurem sekveneerimissügavus s  
 mploying 454 amplicon pyrosequencing to reveal intragenomic divergence in the internal transcribed monospoorse kultuuri sisene ITS varieeruvus tavaliselt min  
 ns on the assessment of bacterial community structure in soil and human-associated samples. *FEMS M mullaproovide seismise aeg ega temperatuur ei avaldanud t  
 sed metagenomic data. PLoS ONE* 8:e60458. müra eemaldamise võtted: trade-off sekvenside arvu, kesk  
 rsity and community structure of anaerobic gut fungi (phylum Neocallimastigomycota) in ruminant ane Neocallimastigomycota loomade kõhus: suguk tasemel pa  
 135-1145. next-generation DNA sekv strat, sh 454 (pms indelid vigad  
 re *Biotechnol.* 26: 1117-1124. next-generation DNA sekv strat, sh 454, Illumina, AB Soli  
 chnologies for environmental DNA research. *Mol. Ecol.* 21: 1794-1805. NGS meetodite ülevaade  
 lost identity is a dominant driver of mycorrhizal fungal community composition during ecosystem deve NS31-AML2 454 vs TRFLP: tulemused kvaliti ja kvantiti sa  
 ated in the MinION portable single-molecule nanopore sequencer. *GigaScience* 3:22. Oxford Nanopore MinION: mediaanpikkus 5500 b, ent kui  
 ncer. *Mol. Ecol. Res.* 14: 1097-1102. Oxford Nanopore MinION: mediaanpikkus 5500 b, ent kui  
 ing multiplexing and validation of data accuracy for diet assessment: application to omnivorous diet. M palju praimerid multipleksitud taimelede ja loomadele eri  
 PH. 2013. Simultaneous amplicon sequencing to explore co-occurrence patterns of bacterial, archaeal paljude eri geenide produktide kokkusegamine ühiseks NG  
 m C, Gnrke A. 2011. Analyzing and minimizing PCR amplification bias in Illum PCR bias: AT ja PCR bias: AT ja GC rikkad piirkonnad, kus kumbagi üle 9  
 al inference from next generation DNA sequencing. *PLoS ONE* 9: e90234. PCR replikaatide arv ei mõjuta liigirikkust ega BD-indeksi  
 es from complex microbial communities. *ISME J.* 3: 1314-1317. PCR-järgne DNA replikatsioon eriti metagenoomide, vähem  
 54 pyrosequencing: does read abundance count? *Mol. Ecol. In press* PCR-põ PCR-põhised meetodid ei kõlba kvantifitseerimise  
 ltra-deep sequencing enables high-fidelity recovery of biodiversity for bulk arthropod samples without PCR-vaba rikastatud mtDNA CO1 ja rDNA sekveneerimise  
 of soil pH as a predictor of soil bacterial community structure at the continental scale. *Appl. Environ. pH määrab bakterite BD (unimod pH6-7) ja koosluse struk  
 sity. In: Xu J-R, Bluhm BH, eds. Fungal Genomics: Methods and Protocols. ???: Humana Press, pp.?? pipeline kirjeldus: assambleerimine, esmane trimm, kehvac  
 2007. A pyrosequencing-tailored nucleotide barcode design unveils opportunities for large-scale sampl praimerite tagide konstrueerimine. Pyro produktide arv või  
 in tallgrass prairie soil. *Mycologia* 102: 1027-1041. preeriamullas. ITS1 praimer ei kõlba. Esindatud kõik seent  
 ugenholtz P. 2010. Experimental factors affecting PCR-based estimates of microbial species richness : produktid kuni 400 bp: lühemaid produkte valitakse 454s,  
 /T. 2009. Accurate determination of microbial diversity from 454 pyrosequencing data. *Nat. Meth.* 6: programm PyroNoise suurendamiseks 454 andmete täpsust j  
 . 2012. The Biological Observation Matrix (BIOM) format or: how I learned to stop worrying and love proovide-OTUde tabelid ja ühtlustatud pakkimise formaat  
 t; linnas Russ, Boletaceae, mól: Tuberaceae, Cortinariaceae Quercus spp Kansases linnas vs maal; vs aastajad; lühikes  
 va L, Snajdr J, Ridl J, Vleck C, Voriskova J. 2012. Active and total microbial communities in forest s RNA vs DNA, ITS ja SSU  
 rosequencing: current approaches to data analysis and the introduction of the pipeline SEED. *Biol. Fer SEED pipeline; soovit kasutada konsensusjrk  
 erer N. 2010. Soil bacterial and fungal communities across a pH gradient in an arable soil. ISME J. 4: 1 seened ja bakterid põllumullas pH gradiendil SSU põhjal  
 iettinen O, Oinonen P, Auvinen P, Paulin L, Larsson K-H, Mäkipää R. 2010. Id seened ja puutüvede seened j 454 Power Soil puudust  
 eographically patterned and more diverse in temperate zones than seened siseruumide tolmus: olul seened siseruumide tolmus: oluline geograafiline regioon/k  
 ers TO, Tucker AE, Sung W, Thomas K. 2009. Evaluating high-throughput sequencing as a method for segu-DNAst ei peegelda kvantitatiivset aspekti kuidagi. V  
 Heath DD, Critescu ME, McIsaac HJ. 2013. High sensitivity of 454 pyrosequen sensitiivsus kuni sensitiivsus kuni 2.3 x 10<sup>-5</sup> 1/24 plaadil, mis on u 50000 s  
 G. 2008. Increasing ecological inference from high throughput sequencing of fungi in the environment if sequence tags suuremahuliseks sekveneerimiseks keskkonn  
 ing reads suffice for accurate microbial community analysis. *Nucl. Ac. Res.* 35: 1-10. simuleeritud lühikesed jupid 16S rDNAst on õnnestunud praimerite v  
 on and sequencing artifacts on 16S rRNA-based studies. *PLoS ONE* 6: e27310. SSU Pipeline bakteritele; ehk ka Ampliconnoise. Puhastati  
 Experiment - a proposal for standards in functional genomic data reporting. <http://www.fged.org/projects> standardid metagenoomika uuringutele  
 e *Rev. Genet.* 14: 89-99. standardid mikroar standardid mikroarrayde ja metatranskri  
 sse TC, Woolstra CR. 2014. Assessing Symbiodinium diversity in scleractinian corals via next-genera Symbiodinium dinoflagellaatidele ITS2 454  
 led primers for pyrosequencing hundreds of samples in multiplex. *Nature Meth.* 5: 235-237. tagide väljatöötamine, millel 3 bp erinevused - 1 mismatch  
 us *macrocarpa* phyllosphere differ between urban and nonurban environments. *New Phytol.*, in press tamme lehe-endofüüdid: ITS1F-ITS4; sekv ITS4ga ITS2 re  
 re accurate pictures of protistan community complexity using pyrosequencing of hypervariable SSU rDNA Titanium teeb rohkem homopool vigu kui FLX, ent ei tekita  
 ning our way towards understanding global eukaryotic biodiversity. *Trends Ecol. Evol.* 27: 233-243. trendid ja potentsiaal euk jaoks  
 Gussarova G, Hassel K, Henden J-A, Killengreen ST, Rämä T, Stenöien HK, Yoccoz NG, Ims RA. trnL taimelede ja ITS1 seentele lemmingute maost. Eraldi s  
 1 759-769. ülevaade  
 rud H. 2012. Environmental microbiology through the lens of high-throughput DNA sequencing: curr ülevaade meetodites ja bioinformaatikast  
 slimy MM, Batzoglou S, Ronaghi M. 2007. Bacterial flora-typing with targeted, chip-based pyrosequen vagiinaproovides bakterid:  
 in the rare biosphere through improved OTU clustering. *Environ. Microbiol.* 12: 1889-1898. vanades andmetes liigselt OTUsid kuna klasterdamismeeto  
 lecular surveys. *New Phytol.* 188: 916-918. vead sekveneerimisel ülehindavad BDD, eriti Chao-hindaja  
 l quality of massively parallel DNA pyrosequencing. *Genome Biol.* 8: R143. vead: tingitud arv mitme template seondumisest kuulile; ve  
 nd quality assessment of 454 GS-FLX Titanium pyrosequencing. *BMC Genomics* 12: 245. vigade teke: eriti lõpuosas, kokku 10% ilma vigadeta; dom**

associations. *Fung. Ecol.* 7: 70-77.

lant pathogen invasions. In: Ziska SH, Duker JS (eds). *Invasive Species and Global Climate Change*. CABI International, Wallingford, UK, pp. 22-44.

lil toitainevaestes kasvukohatüüpides. *Magistritöö*, Tartu Ülikool.

13. Towards a unified paradigm for sequence-based identification of Fungi. *Mol. Ecol.* 22: 5271-5277.

rhyzical impacts on plant nitrogen nutrition: emerging isotopic patterns, latitudinal variation and hidden mechanisms. *Ecol. Lett.* 18: 96-107.

sequencing reveals host ecological group specificity of arbuscular mycorrhizal fungi in a boreonemoral forest. *New Phytol.* 184: 424-437.

stress combinations. *New Phytol.* 203: 32-43.

sson RH, Bork P, Hildebrand F, Abarenkov K. 2015. Shotgun metagenomes and multiple primer pair-barcode combinations of amplicons reveal biases in metabarcoding ar  
gger F, Pritsch K, Koricheva J, Abarenkov K. 2015. Tree diversity and species identity effects on soil fungi, protists and animals are context-dependent. *ISME J.* in press.

Ruiz L, Vasco-Palacios A, Quang Thu P, Suija A, Smith ME, Sharp C, Saluveer E, Saitta A, Ratkowsky D, Pritsch K, Riit T, Põldmaa K, Piepenbring M, Phosri C, Petersen  
nia]. *Eesti Loodus* 62: 8-13.

rem E, Chuyong G, Kõljalg U. 2010. 454 Pyrosequencing and Sanger sequencing of tropical mycorrhizal fungi provide similar results but reveal substantial methodological  
lowground Components. Princeton University Press, New York.

and K, Kjoller R, Larsson E, Pennanen T, Sen R, Taylor AFS, Tedersoo L, Ursing B, Vrålstad T, Liimatainen K, Peintner U, Kõljalg U. 2010. The UNITE database for mc  
: ITS vs SSU annavad mõnevõrra erinevaid tulemusi kott vs. Kandseente taksonite osas;

ITS as an environmental DNA barcode for fungi: an in silico approach reveals potential biases. *ITS praimerid seentel: ITS ITS praimerid seentel: ITS4 on hea; ITS1F ja ITS5*  
P, Sanchez-Garcia M, Ebersberger I, de Sousa F, Amend AS, Jumpponen A, Unterseher M, Kristiansson E, Abarenkov K, Bertrand YJK, Sanli K, HMM-põhine ITS E:  
iC content of template DNA as a predictor of PCR success. *Nucl. Ac. Res.* 31:e99.

read occurrence of spliceosomal introns in the rDNA genes of Ascomycetes. *Mol. Biol. Evol.* 17: 1971-1984.

versus ITS2 as DNA metabarcodes for fungi. *Mol. Ecol. Res.* 13: 218-224.

128.

ivironmental samples. *Appl. Environ. Microbiol.* 66: 4356-4360.

ele ja liigirikkusele pole olulist efekti; kooslustes domineerib Archaeorhizomycetes 73% kuivas ja 95% niiskes, ent eri töötlustega aladel eri alarühm  
unity ecology and phylogenetic biology. *Ecol. Lett.* 12: 693-711; liigiteke ja spetsialiseerumine alluvad biogeo vs ajaliste faktoritele sõltuvalt skaalast;

pecies from samples. Version 9. User's Guide and application published at: <http://purl.oclc.org/estimates>.

sensitivity and speed of chimera detection. *Bioinformatics* 27: 2194-2200. Uchime

-generation sequencing data. *Bioinformatics* 23: 3150-3152. CD-Hit

er-friendly OTU processing pipeline. *Microbiome* 2: 30.

lies based on data from restriction site mapping of nuclear rDNA. *Mycologia* 86: **Praimerid LR0R, LR5, LR7, LR3R jt LR-praimerid Coprinaceae**

ra R, Stajerova K, Vosatka M, Sykora Z. 2014. Comparison of commonly used **AM praimerid: parim ja esinduslikum on Krügeri fragment ja soovitus NGS j**  
osomal RNAs in metatranscriptomic data. *Bioinformatics* 28: 3211-3217.

oid homobasidiomycetes. *Mycol. Res.* 108: 983-1002. **LSU homobasidiomütseedid** **LSU homobasidiomütseedid.** 12 pea  
n Iowa (United States) aquifer and from previously collected marine and freshwater targeted high-throughput sequencing sets. *Environ. Microbiol.* 15: 2333-2341.

seq: PAired-eND Assembler for Illumina sequences. *BMC Bioinformatics* 13: 31.

gion as a target for characterization of fungal communities using emerging sequencing technologies. *FEMS Microbiol. Lett.* 296: 97-101.

orter TM, Bengtsson-Palme J, Walker DM, de Sousa F, Gamper HA, Larsson E, Larsson K-H, Kõljalg U, Edgar RC, Abarenkov K. 2015. A comprehensive, automatically  
l mycorrhizal fungi in meadows and forests as revealed by 454 pyrosequencing. *New Phytol.* 205: 1608-1618.

works. *Ecology* 83: 2416-2424. connectance võrgust

associated *Frankia* Actinobacteria. *New Phytol.* 204: 979-988.

unit and internal transcribed spacer rRNA operon regions show similar classification accuracies influenced by **blastN ja Naive Bay klassifikaator ning ITS1, ITS2**  
O. 2013. The SILVA ribosomal RNA gene database project: improved data processing and web-based tools. *Nucl. Ac. Res.* 41: D590-D596.

i RA, Oakley BB, Parks DH, Robinson CJ, Sahl JS, Strez B, Thallinger GG, van Horn DJ, Weber CF. 2009. Introducing Mothur: open-source, pl **Mothur - sekvensipõ**  
Bolchacova E, Voigt K, Crous PW, Miller AN, Wingfield MJ, Aime MC, An KD, Bai FY, Barreto RW, Begerow D, Bergeron MJ, **Blackwell M**, Boekhout T, Bogale M,  
1;

trong host preference of ectomycorrhizal fungi in a Tasmanian wet sclerophyll forest as revealed by DNA barcoding and taxon-specific primers. *New Phytol.* 180: 479-490.

strategies and novel lineages revealed by sequences from belowground. *Fung. Biol. Rev.* 27: 83-99.

l assignment of rRNA sequences into the new bacterial taxonomy. *Appl. Environ. Microbiol.* 73: 5261-5267. **klassifitseerimine automaatselt 16S rDNA põhjal**

. 2014. ITS1: a DNA barcode better than ITS2 in eukaryotes? *Mol. Ecol. Res.* In **ITS1 ja ITS2: resolutsioon liigitasemel on paljudes taime- ja loomaperekonda**  
g of fungal ribosomal RNA genes for phylogenetics. In: Innis MA, Gelfand DH, **Spraimerite ITS1-5, NS-seeria ja mt ML-seeria originaalkirjeldused**

ification of fungi by using the ITS2 genetic region and an automated fluorescent c **ITS86F praimer seentel: kattub 90% Ihermarki f/gITS7 praimeriga**  
relationships among cyanobacteria and plastids by small subunit rRNA sequence **SSU151F ja 1391R praimerid originaal**

molecular and morphological evidence. *Fung. Div.* 49: 125-143.

s in the genus *Hebeloma* based on ITS1 and 2 sequences, with special emphasis on the *Hebeloma crustuliniforme* complex. *Mycologia* **Hebeloma: soestumine Salicaceae**  
n within a biological species of the ectomycorrhizal fungus *Hebeloma velutipes*. *Mycol. Res.* 105: 284-290. **Hebeloma velutipes: dikaartion sisal**  
ive isolation in the ectomycorrhizal *Hebeloma crustuliniforme* aggregate in Northwestern Europe: a phylogenetic approach. *Evolution* **Hebeloma crustuliniforme kompleks**  
henetic species concept in the *Hebeloma crustuliniforme* complex within a phylogenetic framework. *Persoonia* 18: 285-316. **Hebeloma crustuliniforme kompleks**  
*phalanthera longifolia* (Neottieae, Orchidaceae) is mixotrophic: a comparative study between green and nonphotosynthetic individuals. *Can. J. Bot.* 84: 1462-1477.

ous M, Aan A, Ots M, Kurina O, Ostonen I, Jõgeva J, Halapuu S, Põldmaa K, Toots M, Truu J, Larsson K-H, Kõljalg U. 2010. PlutoF – a web based workbench for ecolo  
ponents by different fungi: a basis for environmental carbon flux studies. *FEMS Microbiol. Ecol.* 46: 121-128.

Fine-scale phylogenetic architecture of a complex bacterial community. *Nature* 4 **Bakterite mass-sekv planktoni: Bakterite mass-sekv planktonist: 516 OTU (algelt 1067, )**  
r: testing the or **tunnuste erinevuste ajastuse ja jrk analüüs: Ceanothuse (ja tammede) eri alamperek liigid esinevad koos, aga mitte alamperek sisese tunnuste erinevuste ajast**

Roslev P, Wagner M. 2003. The isotope array, a new tool that employs substrate-mediated labeling of rRNA for determinati **18nu oligod 14C rRNA ja nif geenide tuvastat**  
i as a basis for detecting genetically distinct mycelia. *Can. J. Bot.* 45: 1583 – 1589. *Nova Hedw.* 53: 267-289.

JS Cairnsi läh: *Russ/Lact* (6), Boletoid (6), **Põhja-AUS Cairnsi läh: Russ/Lact** (6), Boletoid (6),  
*Bot.* 83: 1-13.

their terrestrial **Igapo: Manause ümbruse ökoloogia; Aldina latifolia domineerib kuivema poole peal. Kuivema igapäo taimekooslus on kasvukoha-end**  
n. J., *For. Res.* 36: 1805-1817.

classification of eukaryotes. *J. Eukaryot. Microbiol.* 59: 429-493.



inc-adapted fungus protects pines from zinc stress. *New Phytol.* 161: 549–555.  
; and Plant Co AM vs ErM taimed erineva N, P juures  
case study in kõrbes kooslused taastuvad kiiremini kui varem hinnatud, sõltuvalt assotsiatsioonitüübist  
äbisch Gmünd, Germany.

1 v lüh tšüüdid

Ectomyc. 3: 13–18.

omycetes, Basidiomycota), a new species from Australia with spores distinctly blue in water. *Aust. Syst. Bot.* 14: 599–606.

Amaurodoni AUS uus liik. Cunning

RM

Thelephoraceae, Hymenomycetes, Basidiomycota) from Australia. *Aust. Syst. Bot.* 14: 607–614.

Tomentella subamyloidea ja T. Radi

tus of *Ramaria*. *Mycol. Progr.* 11: 47–59.

te and H<sub>2</sub>O ex eriliigid vs mikro-mullaerinevused

1 EcM seente omavaheline asetus, mikrokaalas, k EcM seente omavaheline asetus, mikrokaalas, konkurents, kooselu

Hydnum sp. 2 RE

liigisisene ITS varieeruvus

vs kastmine vs lubi

koos Suilluse ja Rhizopogoniga või ilma. Spets haustorid, arv parasitlus

1 AK (eds). *Techniques for the Study of Mycorrhiza*. Academic Press, London, UK: Academic Press, 25–73.

1 AK (eds). *Techniques for the Study of Mycorrhiza*. Pp. 25–73. Academic Press, London.

Suilluse ja Rhizopogoniga või ilma. Spets haustorid, arv parasitlus

htkirper und Ektomykorrhizen. *Z. Mykol.* 60: 143–158.

†arst. *Descr. Ectomyc.* 1: 23–28.

ectomyc. 1: 107–112.

cr. *Ectomyc.* 4: 43–47.

ctomyc. 4: 109–113.

nnuste lühiülevaade. Gomphoid klaad on v tugev; Thelephora-Albatrellus ja Gomphidium on v sarnased EcM poolest. Thelephora terrestris ja Tom subliil üsna erinevad ja v  
ed, sügavuti liigirikkus väheneb; seened liigivaesed, sügavuti liigirikkus väheneb. bakterid ja seened. DGGE. Bakterid väga mitmeklesised, sügavuti liigirikkus väheneb; see

ctomycorrhizal fine roots of forest trees and shrubs. *New Phytol.* 132: 259–270.

ectomycorrhizal *Pinus sylvestris* seedlings in a natural substrate treated with elevated Al concentrations. *Tree Physiol.* 23: 157–167.

orrhizal plants under constant versus variable soil nutrient concentration. *Mycorrhiza* 12:257–261.

7 and interesting species from Guyana. *Mycologia* 95: 614–619.

Guyana torikud, sh. Coltricia verruc;

i seedlings wit Larix idandite EcM kolonis suurim lehise metsas, vahepealne paljal pinnasel, väiksem Salix juures. Ilmselt Salix ei fasiliteeri

icer of the nuclear ribosomal repeat identify *Laccaria proxima* strains. *Mycologia* IGS2 RFLP *Laccaria proxima* tüvede eristamiseks sobib PCR produkt 4000 bp, tihti mitu;

levis *siccigleba* (Cribbeaceae), in the Albatrellaceae using morphological and molecular data. *Mycol. Res.* 111: 653–662.

Leucogastrales+Polyporoletus ja All

ycol. *Res.* 111: 1030–1039.

puguseente teke tavalistest Russulac

re hepatics. J. Sammalde ja maksasammalde eelistused teatud raba-kasvukohatüüpide suhtes (sh *Lophozia*, *Aneura*)

s are induced in eucalyptus roots according to aggressiveness of Australian ectomycorrhizal strains of *Pisolithus* sp.

eukalypti

osts in a transitional tropical plant community. *Ecology* 88: 559–566.

AM ITS-T-RFLP

in relation to mycorrhizal infection. *New Phytol.* 97: 401–411.

s from *Goodyera repens* mycorrhizas. *Trans. Br. Mycol. Soc.* 80: 99–106.

of some Malaysian forest trees. *Phil. Trans. R. Soc. Lond. B* 335: 379–388.

of some Malaysian forest trees. *Phil. Trans. R. Soc. Lond. B* 335: 379–388.

thacrylate. *Br. mycol. Soc.* 77: 425–429.

ECM puud troopikas: Dipterocarpaceae, Euphorbiaceae (Uapaca), Caesalpiniaceae, Fabaceae (Pericopsis), Myrtaceae, Nyctaginaceae (Neea)

orest: implicati mükorüasüsteemid troopilises Aasias ja Aafrikas. Troop metsi limit pms P, N vaid valge-liiva ja erikoidide ökosüs-des. Seentest tihti rohkem kasu kasvule l

ECM taimed troopilises Lääne-Aafrikas: ülevaade

Syst. Bot. Mis Amherstieae (GilbertioD, PellegrinioD, Ju Amherstieae (GilbertioD, PellegrinioD, Julbernardia, Brachy Amherstieae (GilbertioD, Pelle;

Kus ja millal tekkisid EcM seened ja taimed esmalt või tek iseseisvalt eri paigus? Seab kaheldavaks dipter

aring the performance of Bayesian Markov chain Monte Carlo sampling and bootstrapping in assessing phylogenetic confidence. *Mol. Baieesia vs Baieesia vs maximum lii*

rhizal fungi by other soil-microorganisms. *Mycol. Res.* 93: 182–186.

spooride i

on rates of genetic divergence and speciation. *Proc. Natl. Acad. Sci. USA* 103: 9130–9135.

ECM vs AM globaalskaalas

ECM vs AM globaalskaalas

interactions a ECM ja AM seened: ülevaade; liigirikusele kindlustushüpootees

ECM vs VAM vulkaanilisele alale. ECM probleem monokaartü ECM vs VAM vulkaanilisele alale. ECM probleem monokaartüonite mitte kokkusaamises

ion find different fungi from the same ericoid mycorrhizal roots. *New Phytol.* 160 ITS1F-TW13, ErM seentele

setting conservation guidelines. Trends Ecol. Evol. 16: 613-622.

Õ3 mõju: peaaegu kõigi EcM seente VK toodang vähenes, v.a. Laccari aktiivsete mikroobide tuvastamiseks süstiti mulda 3-bromo-deoksü-uridiini communities. Proc. Natl. Acad. Sci. USA 105: 11512-11519.

etel seentel käändudes, peentes okstes ja ladvajuppides; T-RFLP vs kultuurid vs viljakehad. Eri puuduosades seemned viljusid erinevalt, ent arv peenes lagupidus on olemas l Kapimaa taimede MR staatus: Ericaceae-ErM; EcM pole; NM -Cryophyllidae, Brassicaceae, Crassulaceae, Proteaceae, Santalaceae, Zygothylaceae, Restionaceae, Cyperbe database. Appl. Environ. Microbiol. 62: 3557-3559.

oligonukleotiidprobe andmebaas eeskirja oligonukleotiidprobe andmebaas eeskirjade RNA extracts affects hybridization results. Appl. Environ. Microbiol. 66: 4547-4554. RNA hübrid RNA hübridiseerimist segavad humiinhapped

nsistent metric for nestedness in ecological systems: reconciling concept and measurement. Oikos 117: 1227-1239. nodF nestedness arvi

thinking matri: anti-nestedness: võib tuleneda mitmest asjaolust - keelatud interaktsioonid ja malalaua-asustus. Ka high-turnover, eriti väheste vaatlus infectious diseases: from evidence to a predictive work. Science 341: 5 kliimamuutused viivad soodustada või inh haiguste levikut. Erinevad mehhanismid

7. Gapped BLAST and PSI BLAST: a new generation in protein database search programs. Nucl. Ac. Res. 25: 3389 - 3402.

w genus of Inocybaceae from the Mediterranean region. Mycologia 102: 1389-1397.

yan GS, Venturella G. 2011. First molecular data on *Delastria rosea*, *Fischerula macrospora* and *Hydnocystis piligera*. Bol. Soc. Micol. Madrid 35: 31-37.

n. *Tuber melosporum* comb. nov. Bol. Soc. Micol. Madrid 36: 23-28.

nd to clay minerals. Mol. Ecol. 7: 775-778. eri koostisega saviosakestega seonduva DNA säilimine, er

a maaiseste viljakehadega seente liigirikkus. ECM peremeestaim on juurde pandud meelevaldselt ilma igasuguse maaisese vaatluseta

ultimaculatum sp. nov. Mycologia 84: 926-929. Loculotuber gen. Nov. (kasvuk

llings in mineral soil with and without organic layers in a California forest. Can. J. For. Res. 9: 311-315.

spatial distribution of acid phosphatase activity in ectomycorrhizal tissues depends on soil fertility and morphotype, and relates to host plant phosphorus uptake. acid pho

ie core Malvales: evidence from the ndhF sequence data. Am. J. Bot. 86: 1474-1486. ndhF: päim sosarperek Craigiaga ja s

es in microbial ecology. FEMS Microbiol. Rev. 24: 555-565. RNA hübridiseerimise plussid miinused; PCR

e viljakehadega seentel: eriti vanades metsades ja kõdupidus

eld: linkages ii ülevaade: ECM funktsioonid ja roll looduses

or western hemlock (*Tsuga heterophylla*). Mol. Ecol. Notes 2: 236-238. RAPD, SCAR markerid tsuugale

ion of a prized edible mushroom *Tricholoma matsutake*. Conserv. Genet. 11: 295-302.

al structure of *Matsutake* mycorrhizas. Mycol. Res. 113: 541-551. mükoriisadest 1-koopia geenide amplif on suur pr

MC et al. 2013. Macroecological patterns of marine bacteria or bakteritel ookeanides globaalselt

or the identification of white Tuber species. FEMS Microbiol. Lett. 189: 265-269. multiplex-PCR tuberite eristamiseks, spets praimerid eri tuberi liikidele

of the ectomycorrhizal fungi in the genus *Tuber* by species-specific ITS primers. spets ITS või 18S praimerid eri tuberi liikidele

rm HN

Cortinarius species associated with *Quercus* and *Comarostaphylis* in Costa Rica. Can. J. Bot. 85: 794-812. Cortinarius Costa Ricas: liigid, mis s

rse overstorey: puude elurikkus ei mõj muude soontaimede elurikkust

cladistic analysis based on ndhF sequence data. Int. J. Plant Sci. 164: 763-773. Sapotaceae jaguneb 3 rühma, kus tri

ification of the Ericaceae. Nord. J. Bot. 14: 385-401. Enkianthus on basaalne Ericaceae. A

oing morphological, ultrastructural and molecular methods. Mycol. Res. 100: 1117-1126. Rhizoctonia kompleksi rühmad: Heli

seene mütseel mullas: PCR-põhine -ülevaade. Praimerite valik, T-RFLP, praimerid bias

ntier. FEMS Microbiol. Rev. 31: 388-406.

ialophora; cf *Hymenoscyphus*, pms tundmatud

l internal transcribed spacer polymerase chain reaction primers for estimating fun seente mulla BD uurimine: eri seente mulla BD uurim PAUP analüüsi väärkasutamine ilma

liigisisene: SI vs RAPD; mikrosatelliit

ke by two Australian *Pisolithus* species. Mycol. Res. 105: 977-982. glutamiini

liigisisene: RAPD

RAPD mikrosatelliit

sation by *Pisolithus* isolates maintained in axenic culture. Mycorrhiza 11: 53-56.

method of constrained ordination for ecology. Ecology 84: 511-525. CAP: mitteparameetrilin

nce. Aust. Ecol. 26: 32-46. DISTLM, DISTLM for

ional multivariate analysis of variance. University of Auckland, New Zealand.

imine Chao2, jackknife ja bootstrap abil. Proovide arvu suurendades suureneb Chao2 pooltel juhtudest (vahemikus 5-15); 15-20 peal +-stabiilne mardikate ja põrnaikate

. Comparative analysis of human gut microbiota by barcoded pyrosequencing. PLOS One 3: e2836.

Lõuna-Brasíilia Araukaaria ja Atlantilise vihmametsa puud AM Lõuna-Brasíilia Araukaaria ja Atlantilise vihmametsa puud AM, ECM puuduvad, isegi *Coccoloba* ja *Caesia*

tive analysis of different methods for evaluating quality of *Quercus ilex* seedlings inoculated with *Tuber melanosporum*. Mycorrhiza 24: S29-S37.

mul ja O3 nõrgalt inh EcM seente VK biomassi haavikus. *Leccinum* spp suurenesid enim, ent mõnedel liikidel ka vähenes (*Paxillus*). Pigem vähen

ersal. In: Wicklow DT, Söderström BE (eds.) *The Mycota IV*. Springer: Berlin, Germany.

plant surface: bakterid, arhed ja seemned taimede pinnal. Funktsioon bakterid, arhed ja seemned taimede pinnal. Funktsioon, fülogenees, kohastumused, hotspot

*Salix rotundifolia*. III. Resynthesized mycorrhizal complexes and their surface phosphate activities. Can. J. Bot. 59: 2458-2465.

and belowground responses to global change at community and ecosystem scales. Glob. Change Biol. 15: 914-929. Structural equation r

orrhizal fungi: Leaf fall and litter quality explain changes in fungal communities on the roots of co-occurring Mediterranean oaks. Soil Biol. Biochem. 42: 788-796.

ja varise lan tammeliigid omavad erinevalt varise kvaliteeti ja varise langemiseaega. Varise kvaliteet mõj F-horisondi kvaliteeti ja seeläbi EcM koo

re B. Appl. Environ. Microbiol. 58: 3110-3116. LIP tuvast

yrosekv: Domin *Sistotremastrum*

ynamic null n bioloogiline mitmekesisus mõõda laiuskra bioloogiline mitmekesisus mõõda laiuskraade: troopika on tekkekese, aga nullmudel ei toea

edlings. New männid transpordivad juurtesse arv apoplasti kaudu ohku, samas kui kuusel on see minimaalne

n eleven Swedish coniferous forests in relation to site fertility and nitrogen fertilization. Scand. J. For. Res. 11: 1-6.

1 *Alnus glutinosa* seedlings inoculated with *Frankia* sp. & *Pinus contorta* seedlings connected by a common ectomycorrhizal mycelium. New Phytol. 124: 231-242.

mine: mõnevõrra erinev, koostulise sarn madal. Kloneerimisega rohkem kandseeni ja suurem mitmekesisus, vähem *Sordariomycetes*. K lehe-endofüüli lehe-endofüüdid: kultuu

s, *Dothideomycetes*; temp-mets SordM, DothM, boreaalne mets: DothM, SordM. Fülogeneet BD troopikas väiksem kui parasvöötmes

. V, Kauff F, Lutzoni F. 2009. A phylogenetic estimation of trophic transition networks for ascomycetous fungi: are lichens cradles of samblikega seotud seemned on f

challenges, and frontiers. Fung. Biol. Rev. 21: 51-66.

ogy. In: Carson WP, Schnitzer SA (eds.) Tropical Forest community Ecology. Wiley-Blackwell, Oxford, 254-271.

läne-Euroopas 1930-1990; ECM vs saprotroofid; K vs R-strateegid, peremeestaime järgi

roopas väheneb ECM seentel

l ajas ja ruumis: ülevaade

composition in the rhizosphere of Norway spruce seedlings colonized by *Piloderma croceum*. J. Plant Nutr. Soil Sci. 479-486.

peroxidase and laccase in degradation and selective ligninolysis of wheat straw. Int. Biodeterior. Biodegr. 50: 115-120.

Enzyme Microb. Technol. 28: 602-605.

d seeltsist Helotiales

*Pisonia grandis*-Thelephorales ECM esmakirjeldus: Hartig net v vilets, transfer-rakud

*Pisonia grandis*-Thelephorales must tüüp ja pruun tüüp: ECM morfoloogia ja anatoomia kirjeldus: Hartig net v vilets, transfer-rakud. Kummagi tüübi esinemine eri saartel mycorrhizal fungi. Plant Soil 244: 177-187.

, *Thelephora* sp, Cenoc; Isol lüited: samad dominantid, aga saba palju lühem; inokpot mets: *Suillus* spp, *Rhizopogon* spp, *Wilcoxina*, *Trich ustale*, Cenoc, Tom subli; isol 413-433.

varis: *eucalyptus regnans* (mull-huumus, pH 4.0-4.1) lagun 2xkiiremini kui *Pomaderris aspera* (pH5.3-6.1, sisald palju Ca, N, P, K, madal C/N). Eukalüpti al *Eucalyptus* re; *Eucalyptus regnans* vs *Pomaderris aspera*: Euc: juurte teke, areng ja juurestiku omapära: areneb süvajuur, mis peatselt kõduneb. Juured ulatuvad väh 1.5 m s

ip siledatel (sh *Clitocybe*, *Agaricus*, *Mesophellia*, *Cort radicatus*). *Mesophellia* mood leiva-moodi ECM kus juuretipp läbisegi VK-dega

. Biogeogr. 14: 249-285.

Sri Lanka ja India vihmametsa puud on üsna liigivaesed, ent kuuluvad eripärastesse suguko forest structur Aasia dipterokarbid on jaotunud mullastiku, valg Aasia dipterokarbid on jaotunud mullastiku, valguse ja niiskuse gradiendil. Savanniliigid on mitmeid kordi :orrhization helper bacteria: a case of specificity for altering ectomycorrhiza architecture but not ectomycorrhiza formation. Mycorrhiza 216: 533-541.

ured Archaea. ISME J. 4: 182-190.

Arhede kooslust globaalselt ei mõjuta miski peale soolsuse (3%); metaandmete vähesus inh elected in nitrogen uptake rates and ecosystem delta 15N. Ecology 92: 883-891.

lants and deco Süsinikku ladestavad N ühiku kohta ECM-domineeritud metsad 1,7x rohkem kui AM-domin metsad.

ntinental patter C:N 18-20 on piir, kus edasi mikroobid hakkavad allokeerima N-ensüümidele. Seega enamikus kooslustes on mikroobid C-limiteeritu

ngle genet of an isolate of *Terfezia boudieri* (Ascomycotina), a desert truffle. Ant ITS1-4; *Terfezia boudieri* ühel eksemplaril 2 ITS tüüpi, mis erinevad pika deletsiooni poo

ald DNA põhjal ei saa kätte kooslust. PCR põhisüüdlane. Kloonimine+sekv annab >90 kloni pu EcM seenekoosluste uurimisel: Vkke segust erald

spp; resistant prop: samad perek vähemate liikidega. Resistant+N väet Cortinarius väheneb ning Tomentella ja *Wilcoxina* suureneb.

f terminal restriction fragment length polymorphism (TRFLP) analysis of soil fung T-RFLP puudused EcM seente uurimisel: mitmetel seentel tuvastati samal isendil ITSs pu

Russula aff. *A puisniidul* väetades muutub kogu taimekatte 3 RE, + ITS, LSU seq

ibellus, Russ mariae; Ind N: Russ amoen, Cenoc, Russ mariae2; Chic kontr: Xeroc rubellus, Russ sp, Lact quietus; Chi N: Lact quietus, Pez, Cort, (

own Kame *Terfezia claveryi*. Mycologia 72:494-499.

2. BEAGLE: an application programming interface and high-performance computing library for statistical phylogenetics. Syst. Biol. 61 BEAGLE workbench: kiiremad

at specialize in taimed EI stimuleeri mullaloomastikku, mis on spetsialiseerunud nend e kõdu lagundamisele

high-elevation kōdulagunemine: männi kõdu laguneb oma tüüpkasvukohas kiiremini kui võõrsil, ent kuuse ja haava oma mitte Home field advantag

pecies traits in puuliigid Hb, Mä ja Ku mõj mulla pH, N, C/N ja nematoodide kooslust

p E, all epidermoidne

olous and silicolous populations of *Helianthemum nummularium* Helianthemum nummularium: Belgia -suur populatsioonisisene diversiteet vrd samalaadsete taim allosüümi

sis of tropical African trees. Mycorrhiza 22: 1-29.

4 seent. Esimene tumep arv Tom

*Afzelia africana* -tesalpiiniline-ECM süntees õnnestub vaid sama puuliigi alt korjatud seente isolaatidega: *Scleroderma* spp., *Amanita* spp, *Pisolithus*

lengut: *Rhizopogon*1, *Wilcoxina*, *Hebeloma*, *Pyronemataceae*1; inokpot kuivatud 3 RE, sekv vajadusel mitu piirkonda

oot developme lepa ECM seened eelistav looduslikke märgi metsi, eutrofiseerumise ja kuivendamise tulemusel ECM kolonisatsioon väheneb

hizal fungi on organic and inorganic nitrogen sources. Mycol. Res. 101: 523-529.

33 või Cenoc; eemaldades *Laccaria*, *Rhizopogon*, *Russula*, *Lactarius*

*estrus* L.) seedlings in different soils. Plant Soil 179: 287-292.

*s muricata* from resistant propagules after a stand-replacing wildfire. New Phytol 143: 409-418.

ts of needle litt vs okka-(mõnd stimuleerib, teist inhibeerib) ja kõrreekstrakt (inhibeerib):

mycetes and soil microfungi under different ammonium regimes in vitro. Mycol. Res. 104: 691-697.

:M seened: Cort ja Lact võivad viljuda püstistel lepatüvedel. Lapa ECM seened kaovad kuivematel aladel, kuna tõrjutakse välja muude puude ECM

5-20 aasta vanuses prim männikus vs sekundaarses. Huumuse koorimine suurendas viljakehade arvu ja BD

lockum and Zoon, The Hague, The Netherlands.

on of soil fungal mycelium during soil incubation be used to estimate ectomycorrhizal biomass in soil? Soil Biol. Biochem. 36: 2105-2109.

into ergosterol. Soil Biol. Biochem. 33: 2011-2018.

tion into ergosterol. Soil Biol. Biochem. 33: 2011-2018.

JA, Johnson I AM network hoiatab teisi seotud taimi lehetäide rünnaku eest, mille järel taimed eritavad keemilisi ühendeid, mis peletavad lehetäisid.

protist diversity assessments: morphology compared with cloning and direct pyrosequencing of 18S rRNA genes and ITS regions using the conspicuous tintinnid ciliates as

Pyronemataceae, *Scleroderma*, Cort.

iral dynamics in miombo (*Brachystegia-Julbernardia*) woodland Tansaania miombod: kooslused sõltuvad mullatüübist ja tule-reziimist.

ergrazed hillslopes in semi-arid central Tanzania. J. Veg. Sci. ? Tansaania keskosas metsatüübid: peaaegu kõikides *Brachystegia*

and Asia. J. V suur osa Aafrika savannidest ja enamus India-Aa suur osa Aafrika savannidest ja enamus India-Aasia ja PNG savanidest on inimtekkesed ja püsivad tänu põ

og GS. 2008. Biodiversity of the genus *Cladophialophora*. Stud. Mycol. 61: 175-191. Cladophialophora põhiharv=H

f fungus in soil environments by quantitative competitive polymerase chain reacti CQ PCR seentele DNA ekstraktsioon ei soltu pinnases; parim spooride ja k

d function alor looduslike rohumade taastamine: aastati muutub üldkatvus ning eri taimerühmade osakaal: kõrreliste hulk, juurte biomass, mikroobide biomass kasvab, roh

, Lewis OT. 2014. Pathogens and insect herbivores drive rainfo. Janzen-Connell fenomen on tugevam taimedel, kelle seemnete tihedus on suurem; fungitsii

zali fungi of exotic pine plantations in relation to native host trees in Iran: evidence of host range expansion by local symbionts to distantly related host taxa. *Mycorrhiza* 23: 1454-1463.

ral variability in communities of mycorrhizal fungi. *New Phytol.* 205: 1454-1463.

*us tremula*) tree individual may potentially harbour dozens of *Cenococcum geophilum* ITS genotypes and hundreds of species of ectomycorrhizal fungi. *FEMS Microbiol. Ecol.* 2013: 465-473.

ecinity of ectomycorrhizal fungal diversity and community structure along an altitudinal gradient in the Hyrcanian forests of northern Iran. *New Phytol.* 193: 465-473.

acina. Stigavusjaoitus mitteleoline, ent Amphinema, Cenoc suht arvukamad ülakihis (F horis); Tomentella, Craterellus, Ramaria, Lactarius suht arvukamad alakihis (A hor) tion methods on plant and arbuscular mycorrhizal fungal DNA. *J. Microbiol. Meth.* 82: 124-130. **AM seente** DNA säilib paremini külmutatud juurt

, Holloway JD, eds. Biogeography and geological evolution of **Kagu-Aasia, Austraalia, Papuaasia**: mitmed taimerühmad nagu palmid, Elaeocarpaceae, Gramineae; idapoc : 269-272.

he ecology of their native rhizobial populations in tropical soils. *Appl. Soil Ecol.* 22: 211-223.

ecete *Pleurotus ostreatus*. *Folia Microbiol.* 47: 385-390. **lakaasi to**

*FEMS Microbiol. Rev.* 32: 501-521. **tselluloo**

ova I. 2013. Estimation of fungal biomass in forest litter and soil. *Fung. Ecol.* 6: 1-11. **lakaasi: r**

v. 30: 215-242. **arv. Et E**

evidence for their role as facultative soil saprotrophs? *Oecologia* 161: 657-660.

(ETS) of 18S-26S rDNA: Congruence of ETS and ITS trees of *Calycadenia* (Cc 18S-IGS primer

M, Morgan MJ, King AJ, Wilson JS, Hodda M, Hardy CM. 2013. Impacts of inundation and drought on eukaryote biodiversity in semi-arid floodplain soils. *Mol. Ecol.* 22: 2601-2618.

3. Biotite weathering and nutrient uptake by ectomycorrhizal fungus, *Suillus tomentosus*, in liquid-culture experiments. *Geochim. Cosmochim. Acta* 72: 2601-2618.

**Tansaania: Ka Tansaania: Katavi NP dominCombretum jt mopane** puud. Kasutataval maal basaalpind, puude arv ja BD suurem kui kaitsealal -arv et tegu on kahe koosluse n along a protection gradient in a miombo ecosystem of western **Tansaania** Katavi RP-s vähe sademeid ja sealsetes miombodes domin AM-taimed

sed on type studies. *Mycologia* 90: 118-124.

Plenchette C, Prin Y, Duponnois R, Thiao M, Sylla S, Dreyfus B, Ba AM. 2006. The ectomycorrhizal fungus *Scleroderma bermudense* alleviates salt stress in seagrass (C and heterotrophy in New Zealand mistletoes. *Oecologia* 126:10-20.

re some microbes more ubiquitous than others? Predicting the habitat breadth of soil bacteria. *Ecol. Lett.* 17: 794-802.

mpetitive PCR for quantitation of a Cytophaga-Flexibacter-Bacteroides phylum **kvantit PCR MHB-le**

ory metabolism. *New Phytol.* 181: 243-245.

ies of temperate upland grasslands. *Funct. Ecol.* 13: 650-660. **PLFA**

to linking abo **mullaökoloogia ajaline aspekt: päevasised muutused** johtuvad taimede C liikumisest, sesoonsed sõltuvad taimede suremisest ja toitainete ringest, aastatep bial communities along a fertility gradient of temperate grasslands. *Soil Biol. Biochem.* 40: 100-108.

i. Parasitic pla **Rhinanthus minor** hemiparasiit suurendab taimede maapealset liigirikkust (supresseerides absol dominante), vähendab prod; vähendab mullas seente suht osa nt of decomposer microbial communities following deglaciation. *Soil Biol. Biochem.* 40: 100-108. **PLFA: mikroobide** biomass suurem prim suks aladel lepa, Equisetumi ja Rhacomitriumi r cing DNA extracted from single conidia of aquatic hyphomycetes. *Fung. Ecol.* 3: 261-268.

iron. *Sci. Technol.* 28: 78A-87A. **peroksida:**

391-399. **liigitekke kiiruse määramine, harude vanuse määramine**; näitab et pleistotseenis on liigitekke kiirus peale jääaega jäänud **täpseks rekonstr** kõikide liikide olen lant-enemy int **peremehe-spetsiifika taimede ja nende parasiitide, patogeenide, herbivooride vahel: generalistliigid või peremehe-spetsiifika taimede ja**

**a NW-Am vs Maailma ja sh Patagonia** eksoot istandikes: 15 Patagonias ja 65 Maailma

õma, Amphinema, Wilc, Tom, Pez ostracod, Tuber, Lacc, Rhiz

**ia männi istandikes**: Eur liigid *Hebeloma mesoph*, *Rhizop roseolus*, ka *Thel terrestris*, *Amphinema byssoides*, *Suillus*, *Laccaria*, *Inocybe*, *Amanita*, *Scleroderma*, *Tuber*. Ne tütüpi, kokku 18 tüüpi

i. *J. Bot.* 65: 774-778.

ngi in fourwing saltbush, *Atriplex canescens*. *J. Arid Environ.* 51:449-459.

mid aastaajati erinevad, koloniseerib ka juhtelemente ilma patoloogiliste sümptomiteta, DSE mood v palju lipiiditilku. Pakutakse mutualistlikku kooselu iosphate following absorption by the ascocarps of *Tuber melanosporum* and *T. aestivum*. *Mycol. Res.* 99: 167-172.

scular plants: towards a world map of phytodiversity. *Erdkunde* **globaalne taimede liigirikkus** 10000 km2 kohta: suurim Borneo, PNG, BRA Atl vihmamets. ips among New Caledonian Sapotaceae (Ericales): molecular ev **Uus-Kaledoonia** Sapotaceae on sinna levinud mitmeid kordi AUSSt ja **Uus-Kaledoonia** Sapotaceae on sinn ifferences in arbuscular mycorrhizal fungal communities associated with sugar maple seedlings in and outside of invaded garlic mustard forest patches. *Biol. Invas.* In press

eration of multimillion-sequence 16S rRNA gene libraries from complex microbial communities as assembling paired-end Illumina reads. *Appl. Environ. Microbiol.* 77: 384-391.

animal mutual network-anal, seemnetelevitajad ja tolmeldajad olif rohkem nested kui toi duahelad. Mida rohkem on koosluses i network-anal, seemn ciliate biodiversity maintenance. *Science* 312: 431-433. **network analüüs: tug**

f biodiversity. *Annu. Rev. Ecol. Evol. Syst.* 38: 567-593. **network analüüs öko**

**network analüüsi rakendamine ökoloogias**; viitab koevolutsioonile; muutuste ennustamine; rakendamine pop-geneetikas

ogler AP. 2013. Whole-community DNA barcoding reveals a spatiotemporal continuum of biodiversity at species and genetic levels. *Nature Commun.* 4:1892.

2012. Arthro Lüliljalgsete BD korreleerub taimede Bdga Panamas - nii herbiv kui muud. Troopikas vaid 2-8 korda rohkem artropoodide liike kui ter sade vahel olulised erinevused

n vs 10-20 cm sügavus. Põletamine mõjutab seenekooslusi vaid 10 cm ülakihis, 10-20 cm mitte;

**suguk: Russ(17), Thel(12); Lacc(3); Inoc(3+?); Cort(3). Kontroll: Pisol1; Inoc1; Russ3; Unkn; 2y põletamine: Lact1; Thel1; Thel2; Thel3; Thel4; Thel5; 4y põletamine: In**

l. The architect **network-anal: kooslused on tavaliselt niimoodi** organiseerunud, et konkurents oleks vähim

tsest DNAST kuulub arhedele, suurem kui C:N madal; r **Archaea üle Ameerikate**: keskm 2% prokarüootsest DNAST kuulub arhedele, suurem kui C:N

er N. 2013. Global biogeography of highly diverse protistan co protistide rühmiade levikut määrab eelkõige kliima niiskusk kontinentaalses skaalas.

er and sitka al **lepaseemikud peale ülejutamist vähendavad nitrogeeni** aktiivsust ja juurte kasvu ning õhulõhede avatust. Tekivad adventiivsed ja ujutuse-juured. Nooduli S, Novak M, Buzek F, Harkness D, Persson T, Schulze E-D. 2000. In: Schulze E-D (ed). Carbon and Nitrogen Cycling in European Forest Ecosystems. Springer-Verlag, I

2001. Portable system for microbial sample preparation and oligonucleotide microarray analysis. *Appl. Environ. Microbiol.* ( **väga kiire** DNA eraldamine, märgistamine, ka konkurents **ECM seene osakaalu muutus juurel kui on ka teisi seeni**

: BD parandab taimede kasvu, kuigi on palju vastuväiteid. Funktsionaalse diversiteedi tuvastamise olulisus

:corrhizal dive **ECM seente suurem diversiteet suurendab org P**, aga mitte anorg P kättesaadavust ega mitte N kättesaadavust

em)

WS, Chase MW. 1999. Support for an expanded family concept of Malvaceae w **atpB, rbcL** **Malvales**: sugukonnad sees täiesti se

i from roots and leaves of *Lepanthes* (Orchidaceae). *New Phytol.* 135: 143-149.  
 mycete "fungi". *Protoplasma* in press. **Oomycota**: basaalsed rühmad n  
 ated with *Populus-Salix* stands in a semiarid riparian ecosystem. *New Phytol.* 170: 369-380.  
 11. Impacts of climate change on the world's most exceptional ecoregions. *Proc. Natl. Acad. Sci. USA* 108: 2306-2311.

haliformis, *Russula* sp, Tom2  
 haliformis. Lact ja Russ eelistasid madalamat pHd ja kõrgemat N konts; Tom spp pos või neg seotud pHga

fungi isolated from stem tissue of upland cotton (*Gossypium hirsutum*). *Aust. J. Bot.* 53: 571-578.  
*africanum* rooted cuttings using a range of mycorrhizal fungi. *Int. J. Biol. Chem. Sci.* 3: 578-586  
 s kattus Malaisia dipterokarpidelt saadud liigiga  
*africanum* plantlets from Cameroon. *Plant Soil* 353: 379-393.  
 iversity with a View to Ameliorating Domestication Efforts. PhD Thesis, University of Aberdeen, UK.  
*na sinnamariense*: A tropical mycorrhiza fungus isolated from *Gnetum africanum* ectomycorrhiza root tips. *J. Yeast Fung. Res.* 2: 132-142.  
 inoculated with ectomycorrhizal fungi and planted on a clear-cutting and strip mine. *Can. J. Bot.* 62: 1571-1574.  
 fertilization on growth and formation of ectomycorrhizae of *Quercus alba* and *Q. rubra* seedlings by *Pisolithus tinctorius* and *Scleroderma auranteum*. *Can. J. Bot.* 63: 167-174.

slus **508-511**

que du Congo. *Bulletin de la Societe Royale de Botanique.* 78-107.  
 l von Ektomykorrhizen. PhD Thesis. Ludwig-Maximilians Universität München, Munich. 414 pp.  
 ives of fungal DNA barcoding and rapid identification procedures. *Appl. Microbiol. Biotechnol.* 87: 99-108. **seente barcoding**: COI ei sobi, ITS kõige laiemalt  
*Pisolithus tinctorius* hyphae during ectomycorrhizal infection while excreted fungal hypophorine controls root hair development. *New Phytol.* 136: 525-532.  
 Amann R. 2003. In situ accessibility of small-subunit rRNA of members of the domains Bacteria, Archaea, and **FISH: oligo**; **FISH: oligo**u probed cu3-ga 2 bakteril, 1 arh  
 ulosuse genetiit.

ister species of Rhizopogon fungi on mesic and xeric sites in an interior Douglas-fir forest. *Mol. Ecol.* 21: 6163-6174.  
 ber melanosporum istutatud (BD madalaime seal); liigirikkus neg korrel Tuber melanosp+ aestivumi ohtusega juurtel; spets praimeritega leiti ka T r  
 revisited. *Am. J. Bot.* 97: 1296-1303. **õistaimede** rühmade fülogeneet

005. Larger islands house more bacterial taxa. *Science* 308: 188-191. **liigirikkus** bakteritel veeaugu suurusel sõltub  
 Arv on segunenud nii vana kui ka uute seente DNA **5.8S**\_Fungi praimer ITS1 amplifitseerimiseks. CAAGAGATCCGTTGTTGA  
 rested present: põldude metsastamisel jäävad metsataimestikust puudu paljud kлонаalselt levivad taimed  
**AUS Liivakivi** pinnase EcM taimed (lõtv kriteerium McGee jr); **Platysace** (Apiaceae), Amperea (Euphorbiaceae), Dillwynia, Pultanea (Fabaceae), Dampiera (Goodeniaceae)  
 equenti nelle piante tartufigene. *Nota 1- Inquinanti in vivaio. Micol. Ital.* 1995: 167-178.  
 of ectomycorrhizal plants. VI. Activities of nutrient mobilizing enzymes in birch litter colonized by *Paxillus involutus*. *New Phytol.* 130: 411-417. **proteasid**  
 ctivities of ericoid and ectomycorrhizal fungi. *Soil Biol. Biochem.* 28: 1595-1602. **tanniinid**  
 ex by ericoid and ectomycorrhizal fungi. *Soil Biol. Biochem.* 28: 1603-1612. **proteiin-p**  
 rhizal and ericoid mycorrhizal fungi. *Mycol. Res.* 101: 1348-1354. **ligninaasi**

er bacteria? *New Phytol.* 173: 707-710.  
 in multiple testing with independent statistics. - *J. Educ. Behav. Statist.* 25: 60-83 **Benjamini-Hochberg**  
 rees. *J. Biogeogr.* 18: 103-115. **Europas jääaegade** refuugiumid: eriti tähtsad ilmselt Apenniinid ja W-Balkani mäed; väidet  
 triplett EW (ed) Prokaryotic Nitrogen Fixation: A Model System for Analysis of Biological Process, pp. 207-224. Horizon Scientific Press: Wymondham, UK.  
 and biogeography. In: Gillings M, Holmes A (eds.) *Plant Microb Frankia ja peremeestaimede* fülogenees ja biogeograafia. Lahatakse kõiki taimerühmi eraldi. Palju avaldam  
**ngi shared by various boreal forest seedlings naturally regenerating after a fire in Interior Alaska and correlation of different fungi with host growth responses.** *Appl. Environ*  
 omycorrhizal root tips. *J. Microbiol. Meth.* 80: 206-208. **PCR ilma** DNA eraldamata: 100-kordne lahjendus  
**puude kalibreerimine** ja mol kell. Ar

i2-58 **vendist tänaseni** massväljasuremised ja radiatsioonid nii maal kui meres

hing order among Ascomycota: how many nucleotides are enough? *Mol. Phyl. Evol.* 17: 337-344. **vajalik hüpp vajalik hüpot**.  
*Can. J. Bot.* 71: 1114-1127. **seente evol**: Chytr: 550Ma, Basidio.  
 time. *The Mycota* 7B: 229-245. **rRNA vs muud geenid**: problemaatika fülogeneesis, **rRNA vs muud geenid**: problemaatika  
 ve? *Fung. Biol. Rev.* 24: 1-16.  
 ete morphology based on 18S rRNA gene sequence data. *Mol. Biol. Evol.* 13: 462-470. **Lokulooskomiteedid**: pole monofyl  
 and phylogeny of ericoid mycorrhizal fungi. *Plant Soil* 244: 55-66. **ITS ErM seentel**, sekv **ErM seened**: palju erirühmi, märgata

mitte; välja istutatud  
*um, Pinus sylvestris, Allium cepa* and *Allium porrum*. *Can. J. Bot.* 61: 899-905.

Am Prantsuse Guajaanas EcM taimed *Coccoloba* 3 spp., *Neea tristis*  
 iteet, mis antagonistlikud *Verticillium*ile, maasika vs rapsi risosfääris vs bulk soil Box-PCR + SSU sekv  
 ation structure across three isolated subpopulations of *Russula brevipes* in an oak **SCAR: Russula brevipes**  
*cowanites* sp, *Pilod* sp, *Byssocort* sp, ; taksonitest Thel-Tom (ca 14), Russ-Lact (12), Boletaceae (6), *Tricholoma*, *Inocybe* (mõl 5); endof: *Lachnum* sp, *Phialophora* sp., unl  
**uusikus vs männikus**: *Russula brevipes*-sama-suurus 3-18m **RAPD: 3 mikrosat**  
 iversity of ericoid mycorrhizal fungi in the absence of the host plant in a Mediterranean ecosystem. *Mycorrhiza* 13: 69-75.  
 fungi are common root associates of a Mediterranean ectomycorrhizal plant (*Qu* sekv 2 erikoidMR  
**matsutake**): distribution, abundance and ecology. *Scand. J. For. matsutake levikuökoloogia* **Rootsis**  
**id taimed, toril haruldased taimed, torikulised ja resupinaatsed**: mida suurem ala, seda liigirikkam. Saarte biogeograafia  
 h C. Newton WE (eds.). *Associative and Endophytic Nitrogen-Fixing Bacteria and Cyanobacterial Associations*. Springer, Berlin, 257-301.  
 . Geijer J, Herrmann J, Foster GN, Ribera I, Nilsson AN, Barraclough TG, Vogler AP. 2012. The effect of geog barcoding gap: veemardikate liigisisene COI var s  
 ins the coevolu **mutualismi stabiilsuse ja suurima kasu tagab** aeglane evolutsioneerumine  
**MA, USA: EcM** puud *Alnus*, *Betula*, *Fagus*, *Quercus*, *Pinus*, *Tsuga*; *Prunus*, *Comptonia peregrina*, **NM**  
 idikumullal suurem ECM BD. **ANCOVA**

ergosterol as an indicator of fungal biomass. *Mycol. Res.* 99: 479-484. **ergosterooli mõõtmine** j abio **ergosterooli** mõõtmine j biomassi kalkuleerimine pole vee

septad. Ultrastruktuuri põhjal saab kand-ja kottseeni eristada vaid dolipoori vs Woronini kehakese abil, teised mujal mainitud meetodid ei tööta -sõltuvad vanusest, prepara-  
94: 734. **RAPD: Tuber melanosporum** -regiooni väga väike erinevus, erva tegu pudelikaelaaga viim  
and M. 2001. Population genetics and dynamics of the black truffle in a man-made **mikrosat (viletsad tulemused)** + **RAPD: Tuber melanosporum**: ühe puu ümber keskm 2 g  
enerate oligonucleotide probes targeting a variable region in bacterial 16S rRNA by PCR with detachable primer; **2 PCR tsüklil 2 PCR** tsükliga, beadsid sidumine ja järgn  
. A new pair of primers designed for amplification of the ITS region in Tuber species **ITS4 analoogid trüüvliitele**: ITS6 ja ITS7 -mõnikumend b p eemal. Paremad tulemused  
epigeous fungi **tavaaravate toidus Alpides asinevad pms maaiseste viljakahadega** seened: **Rhizogon, Gautieria, Balsamia, Hysterangium; lehkseentest vaid Boletus ja L**  
Calif kõrbes: EcM taimi pole  
ck WD, Tibbe **mikroobsed interaktsioonid stabiliseerivad** taimekooslusi, ent mõj invasiooni ja troop monodominantsust; **ei usu** et CMNid jagavad ü  
allocation to beneficial symbiont with spatial structure maintains mycorrhizal mutualism. Ecol. Lett. 12: 13-21.  
:orrhizal fungi reduces plant benefit. Proc. R. Soc. Lond. B. 269: 2595-2601.  
eptual framework **koikide mullaorganismide koostoju taimedele**. **Negatiivne tagasiside domineerib positiivse üle, mis põhjustab muutusi mustlilises**  
R, Harvey JA taimeliigi mõju mullaloomade ja AM-seente kooslustele on enamikus rühmades oluline: PLFA>Nematod>Enchytr>Acari>Macrofaun:  
**Tulasnella sp/ Tulasnella spp Cryptothallus mirabilisel, taassüntees mikrokosmos**: **Tulasnella, spets praimerid** **Tulasnella, spets praimerid**  
**ITS: Tricholoma, Rhizogon, Gautieria; rbc: monoITS: Tricho geneetilise**  
ners in the dark: isotopic and molecular evidence of ectomycorrhizal liaisons between forest orchids and trees. Proc. R. Soc. Lond. B 271: 1799-1806.  
s in liverwort-fungal symbioses. Proc. R. Soc. Lond. B 277: 485-492.  
: carbon sink strength of ectomycorrhizal fungi? New Phytol. 151: 543-550. **JMP, anova**  
d uneven ectomycorrhizal diversity near *Sarcodes sanguinea* (Ericaceae): a cheater that stimulates its victims? Am. J. Bot. 87: 1783-1788.  
**2 RE, sekv mtLSU**  
ühmades mfg AM-seened, ent osades (Treibia, Haplomitrium) Endogonales - mood sarn struktuure AM-seentega (Paris tüüp). Arv. Et kõige esma:  
ation and development. Mol. Ecol. 17: 3707-3716.  
: klaadile. **AM diversiteet-epiparasiidid spetsialiseerunud kindlale klaadile.**  
**Mükoheterotr Mükoheterotroofide evol ökol: filogenees, toitumine jms**  
ification, and quantification in the environment. In: Dighton J, White JF, Oudema **PCR-põhiste ja sekveneerimise PCR-põhiste** ja sekveneerimise meetodite artefaktid: heter  
167: 335-352. **Pyrolaceae** on basaalne teiste arbu  
ycorrhizae. USDA Forest Service: Washington USA. pp. 69-80.  
**vs pöögi-tamme segamets (BD suurem, mass, tihedus väiksem)**  
s from boletoid ancestors. Mycologia 94: 85-98. **mikroosente diversiteedi**  
ylogenetic distribution of resupinate forms across the major clades of mushroom-forming fungi (Homobasidiomycetes). Syst. Biodiv. 3 **kandseened** ja resupinaatsed vormid  
**omycetes (mushroom-forming fungi) inferred from four rDNA regions. Mol. Phyl xxx mt vs nuc; SSU vs LSU** **mol; homobasidiomyc**  
f Boletales. Mycologia 98: 971-983. **Boletales EcM harud tek mitu korda**  
R, Price SA, Vos RA., Gittleman JL, Purvis A. 2007. The delayed rise of present-day mammals. Nature 446: 507-512. **imetajate peamine radiatsioon t**  
dures, problems, and prospects. Annu. Rev. Ecol. Syst. 33: 265-289 **superpuude** konstrueerimine, proble  
iku all. Sugaval kivimis sambliku-seene hüüfid, *Hymenoscyphus ericae* aggr., har IF-4  
J, Schumacher T, Kausserud H. 2010. High diversity of root associated fungi in both alpine and arctic *Dryas octopetala*. BMC Plant Biol. 10: 244.  
e. Svensk Bot. Tidskr. 38: 1-13.  
chte. Symb. Bot. Ups. 6. 2.  
iation in forest trees. Svensk Bot. Tidskr. 43: 223-262.  
poole juuresente BD väheneb ja see seletab ka koosluse struktuuri  
idase and xylanase by immunocytochemical labeling in wood decayed by basidiomycetes. Appl. Env. Microbiol. 55: 1457-1465. **MnP (väh**  
ls to degradation by white rot basidiomycetes. Can. J. Bot. 66: 1841-1847. **ligninaasi**  
5: 552-556.  
ot. 73: S999-S1010.  
e indigenous people of North America. In: ???  
**olemasolev: olemasolevate taimede AM-mükotroofsus** määrab ära, millised taimed võivad järgmisena koloniseerida. EcM seente olemasolu võib t  
ycorrhizae of *Picea abies* in the black forest. Agric. Ecosyst. Environ. 28: 27-30.  
y *Paxillus involutus* and mycorrhizal birch seedlings. FEMS Microbiol. Ecol. 33: 61-67.  
B, Chalot M. 2000. Differential responses of ectomycorrhizal fungi to heavy metals in vitro. Mycol. Res. 104: 1366-1371.  
Can. J. Biochem. Phys. 37: 911-917.  
ty on belowground communities. Ecosphere 1: 1-11.  
itive data: behavioral traits are more labile. Evolution 57: 717-745. **Blombergi** K. K vään  
ey TJ, Likens GE. 2002. Mycorrhizal weathering of apatite as an important calcium source in base-poor forest ecosystems. Nature 417: 429-431.  
ology: a critique **Network-anal: ülevaade nisipõhine ja mõjupõhine lähenemine; artefaktid ja juurdunud töed vs. Proovivõtu kallutus; soovitus anali**  
div. Conserv. 7: 617-630. **nematoodid** mullas: liigirikkus kõige kõrgem soojas temperaatses võõrtes ja troopikas  
e, Tanzania. III. Effects on the vegetation of local cultivation practices. J. Ecol. XXX  
uutuste mõju ülevaade viljakahade tekkele ja arengule: ülevaade  
**omycetes. FEMS Microbiol. Ecol. 31: 185-194.**  
idase-encoding genes are present in a phylogenetically wide range of ectomycorrhizal fungi. ISME J. 3: 1387-1395. **Peroksid**  
ic relationships of cyphelloid homobasidiomycetes. Mol. Phyl. Evol. 33: 501-515. **torukuj ja pulgakuj cyphelloidised ka**  
. 2003. Development and validation of a diagnostic microbial microarray for methanotrophs. Environ. Microbiol **metanotroof metanotroofid: 50 bp RNA fragmendid; väga**  
rns in old-growth forests of southern Chile as integrator for N-cycling. Isot. Environ. Health Stud. 41: 249-259.  
W, Schoch CL. 2009. A molecular phylogenetic reappraisal of the Hysteriaceae, Mytiliniaceae and Gloniaceae (Pleosporomycetidae, **Dothideomycetes: Pleosporomy**  
eness of soils long a successional chronosequence. Mycorrhiza 6: 79-90.

ise EcM seenekooslusi: lepp assots mõne kase seenega ja vastupidi, eriti siis kui on prioriteedi efekt. Hüpot, et spetsiifilisus avaldub eoste idanemisel nadal BD, ent Salixil suurem. Domin taksonid sh lepa-liigid olid jagatud mõlema peremehe vahel samades kasvukohtades, ent esines tugev peremehe ectomycorrhizal community and drought affect root hydraulic properties and soil adherence to roots of Pinus pinaster seedlings. Plant Soil 267: 213–223.

retilised, mitteparameetriselised ja filogeneetiliselt lahendused; VIITED

Pezizales sp., Thelephora americana

mikroobide diversiteedi

es az ezekkel valo tarsulasuknak mestereseges letrehosaza teren. Erdaszettudomnyi Koezlemynek 1: 93-118.

pecific primers enables quantitative, ultra-high-throughput profiling of fungal communities. Appl. Environ. Microbiol. 78: 1000–1008.

aporaseo JG. 2013. Quality-filtering vastly improves diversity estimates from Illumina amplicon sequencing. N Illumina järjestustele tavaline kvaliteedikontroll ; J onifers. In: Tra muld lepa all palju happelisem kui okasmetsas (F hor 3.5 vs 4.3)

of Archaea in defined compartments of pine mycorrhizospheres developed in boreal forest humus microcosms. FEMS Microbiol. Ecol. 43: 163-171.

isotopic, culture-based, and oligonucleotide microchip analyses of thermophilic microbial communities in a continental high-t termofiilsetele bakteritele ja arhedele Siberi n; in a world without fire. New Phytol. 165: 525-538. savannide ökosüsteeme maakeral, er Lõuna-poolkeral palju rohkem kui seletaks vaid kliima. Põlengutel ol

orical biogeography and diversification of truffles in the Tuberales and their newly identified Southern Hemisphere sister lineage. PLoS ONE 8: e52765.

), T Lyonii ohtrus ei sõltu sellest, kas neid on leitud ja kogutud viljakehadena. Liikide arvult tom-thel; palju Pezizalesid

of Tuber ITS rDNA sequences: species diversity, host associations and long-distance dispersal. Mol. Ecol. 19: 4 ITS barcode Tuber ITS barcode Tuber: 96%, hiaati

ron liigid, ka Hymenogaster-Hebeloma. Pezizaleste rohkust seostavad paljandunud mullaga, madala EcM juurte tihedusega, neutraalse-aluselise r

s in the rhizosphere: interactions between Norway Spruce seedlings Picea abies Karst.), mycorrhiza (Paxillus involutus (Batsch) Fr.) and naked amoebae (protozoa). Appl.

. Diversity of mycorrhizal fungi in terrestrial orchids: compatibility webs, brief encounters, lasting relationships and alien invasions. Mycol. Res. 111: 51-61.

n in a tempera EcM noored taimed kasvavad paremini ja on suurema elumusega, ent eelistatamad herbivooride poolt paikades, kus pole juurkonkurentsi suurte puudega. El cological variation. Ecology 73: 1045-1055. PCNM vektoritega F PCNM ruumiliste

of principal coordinates of neighbour matrices. Ecol. Modell. 153: 51-68.

seedlings grown in soils collected at different distances from pioneering hardwoods in southwest Oregon clear-cuts. Can. J. For. Res. 20: 712-721.

is and temporal taimede BD mõj taimede biomassi, mis stimul lüljalgsete biomassi ning diversiteeti, mis omakorda soodust stabiilsust. Taimede BD s explain the 13C-enriched sporocaps of ectomycorrhizal and saprotrophic fungi? New Phytol. 177:1012-1019.

thelephora, cort

<0.5 m sees pole ka ruumilist autokorrelatsiooni

sclerophyll forests urgently needed. Biodiv. Conserv. 4: 415-42 Uus-Kaled sklerofiillimetsad on hävimas

ure of two open-pollinated families of Picea abies. Effects of nitrogen source and ectomycorrhizal symbiosis. J. Plant Physiol. 160: 1211-1218.

Rozites species mycorrhizal with Nothofagus and Myrtaceae. Rozites: uued liigid, pms seotud Nothofagusega. Arv Rozites on hiljer Rozites: uued liigid, pms seotud Not karri (Eucalyptus diversicolor) seedlings inoculated with ectomycorrhizal fungi in relation to phosphorus supply. New Phytol. 114: 77-85.

ZL hüpogeilised seened: AUS v liigi- ja perek-rikas, NZL vaesem. Maapealsed sugulased. Sh AUS-sse introduts perek; Pezizales v v AUS ja NZL hüpogeilised seened: A

Descolea oli arv. algsest seotud Nothofagusega, ent tertsaaris kliima r Descolea maculata sp nov, mood Ec mycorrhizas and growth of karri (Eucalyptus diversicolor) seedlings inoculated with Descolea maculata, Pisolithus tinctorius and Laccaria laccata. New Phytol. 114: 87 m Australia. Mycotaxon 42: 255-262. Leccinum üksik liik AUS QLD euk

vi seente BD on u 6500 liiki, arvestades 660 liigi olemasolu ja 10% liikide kirjeldamist

oot-associated fungi from Epacris pulchella (Ericaceae) as determined by culturing and direct DNA extraction from roots. Environ. Microbiol. 7: 819-827.

on lochiaie (Ericaceae) in an Australian tropical cloud forest revealed by culturing and culture-independent molecular methods. Environ. Microbiol. 7: 1743-1754.

d other root-associated fungi from Epacris pulchella (Ericaceae). Mycol. Res. 110: 328-334.

quence analysis of endophytes from Acianthus, Caladenia and Pterostylis (Orchidaceae) in southeastern Queensland. Mycol. Res. 109: 452-460.

nderground orchid, Rhizanthella gardneri. New Phytol. 186: 947–956.

ot-associated fungi from Epacris pulchella (Ericaceae) as determined by culturing and direct DNA extraction from roots. Environ. Microbiol. 7: 819-827.

in Hymenosc ericae aggr., muud Helotialesed, Xylariaceae jpt kottseened, vaid paar identifitseerimata kandseent. Kult vs juurest sekv annab eri tulemused, ent mitte siiski didega: liikide erinevatel tuvastatavusel ja vaatleja võimekusel oluline roll liigirikuse hindamisel liigirikuse modelleerim

Abies, Picea, Fagus, Mycelis muralis ja Sambucus racemosa mood EcM Cenococcumiga; Ei illustreeritud

Fagetum carpaticum de Babia Gora et Celui D'Autres Fageta Precedemnt Etudies. Zezsyty Naukowe Wyzszej Szkoły Rolniczej w Szczecinie 3.1.

Cedrus seedri 3 liigil Prantsusmaal EcM: mitmed tüübid. Kahtlustab Geopora sumneriana seost

luorescent proteins for visualizing fungal pathogens. Fun. Gen. Biol. 37: 211–220.

bacterial communities across land-use types and their relationships bakterid õhus: kooslused määrab ära allolev ökosüsteem, mitte hetke kliimaatilised tingimus em pools and CO2 fluxes. New Phytol. 178: 24-40.

d drought toler: kasv veestressi korral ja kasu taimede

level of Rhizoctonia solani AG4 isolates by direct sequence of asymmetric PCR products of the ITS regions. C topeltipiikide interpret Rhizoctonia solani AG4 jaotub 3ks l 3noort vs 3 vana metsa

Cenoc, Suillus brevipes. Erilist raie mõju polnud

composition fauna 3 suurusrupi eemaldamine. Väikseimate loomakeste eemaldamine suurendas oluliselt rohundite ja liblikoeliste osakaalu vorreldes korrelistega; sama: mmunities to vascular plant abundance along a climate gradient. New Phytol. 205: 1175-1182.

LSU kaas: LSU kaasamine ITS-

LSU kaas: LSU kaasamine ITS-

anti katse eri päritolu muldadega

uber: mosaikne mantel ja tsüstiidid; Fagihiza granulosa -Tomentella

by plant-soil fi taimeliikide poolt genereeritud mulla heterogeensus suureneb teatud taimeliikide vitaalsust

l JD, Jacob A. 2003. PNA microarrays for hybridisation of unlabelled DNA samples. Nucl. Ac. Res. 31: e119.

valk-DNA arrayd; sekundaar-mass-spektrome

ke up nutrients by Betula spp. and Picea abies in mixed stands. For. Ecol. Manage. 198: 193–208.

Claridge MF, Dawah HA, Wilson MR (eds.). ??? Chapman & Hall. ???

seente liigikontseptsioonid: peab soot

cuta, seene elab korteksirakkude sees, ei parasiteeri, moodustab nn seedimistoone nagu orhideedel. Viitavad samasuguse assotsiatsiooni peale kuldkaani vahel; sünteesiti l

hizal fungi for degradation of polycyclic aromatic hydrocarbons. Appl. Microbiol. Biotechnol. 53: 127-132.

icroarray experiment (MIAME): toward standards for microarray data. Nature Genet. 29: 365-371.

geeniexpress: geeniexpressiooni arrayde standardite pakku

kõdu: Inocybe. Kõdu lisamine vähendab BD, ühtlust (tänu Cenoc-le, mis ei taha varist)

Shannoni, Berger-Parke

on in tropical ectomycorrhizal fungi. Res. Microbiol. 156: 184-190.

liigist, valgustatuse tasemest ja P lisamisest

*yobalanops lanceolata* (Dipterocarpaceae) seedlings grown in ultramafic and non-ultramafic soils. Soil Biol. Biochem. 38: 3407-3410.

ps and the efficacy of ectomycorrhizal inoculation schemes. QQQ

ps and the Efficacy of Ectomycorrhizal Inoculation Schemes. In: Rai M, Varma A, eds. Diversity and Biotechnology of Ectomycorrhizae. PP. 3-17. Springer: Berlin, Ger  
a, in press.

M, Barkhordarian E. 2002. Phylogenetics of asterids based on 3 coding and 3 non-coding chloroplast DNA regions. Mycol. Res. 106: 105-114.

phylogenetic relationships within Paxillus s. l. (Basidiomycetes, Boletales): separation of a southern hemisphere clade. Mycol. Res. 112: 650-662.

. 2010. Diversity of fungi associated with *Bistorta vivipara* (L.) Delarbre root systems along a local chronosequence on Svalbard. Agarica 29: 15-26.

54.

te pole. Muuhulgas Serendipita, Helotiales mfg, Cladophialophora, ChytridioM

ogeo, endeeme vähe

81-388.

India bio-ja paleogeograafia: Eraldub Aafrikast 160 MAT, Antarktikast 130 MAT, Madagaskarist 88 MAT

vastuväited maa paisumise hüpoteesidele

of a herbarium. New Phytol. 181: 719-724

70% ITS sarnasus, et defineerida perekonda; vana

ate upland grassland soil. FEMS Microbiol. Ecol. 45: 105-114.

T-RFLP on parem kui DGGE keskkonnaproovide võrdlemisel; popgene; polyniipolymor

tes regulate soil fungal community composition and diversity. Appl. Environ. Microbiol. 74: 738-744.

mutualismi ekspluateerimine: eritiübid (konditsionaalne, spets); sanktsioneerimisvõimalus tagab stabiilsuse. Päriliseks ekspluateerijad ei arene mutualistidest, vai

of Melaleuca, Callistemon and related genera (Myrtaceae). Aus Melaleuca levinud AUS-st ja Uus-Kaledoonias SE-Aasiani. Teiste läbi Melaleuca levinud AUS-st ja Uus-K

ened poolkõrb vs stepp: ilmastiku fluktuatsioonid, mändide vastuvõtlikkus röövlilikele: mõju sipelgatele, närilistele, ECM seente kolonisatsioonile, resistentsus

the North Crac juurte ulatus aine ülesvõtu järgi puudel 9,6-16,4 (tammel) m pikkusega 130 b; 333K sekventse jäi järgi pärast kvaliteedikontrolle. Ion Torrent: seened ITS1: 3M sekventsi keskmepikkusega 130 b; 333K sekver

spruce by Laccaria species and Thelephora terrestris and seedling survival and growth after outplanting. Can. J. For. Res. 23: 330-333. Thelephor

g BY, Durka W, Erfmeier A, Gutknecht J, Guo D, Guo LD, Härdtle W, He JS, Klein A, Kühn P, Liang Y, Liu X, Michalski S, Niklaus P, Pei K, Scherer-Lorenzen M, Scholter

the ectomycorrhizal association between Paxillus involutus and Betula pendula. I. Dynamics of mycorrhiza formation. New Phytol. 129: 487-493.

Austraalia SW osa taimede mükotroofsus: Allocasuarina (Cas), Gompholobium, Mirbelia, Oxyllobium (Papil, ;Mirb), Eucalyptus, Agonis, Melaleuca, Pericalymma (Myrt),

. I. Seasonal study of inoculum levels. New Phytol. 127: 539-546.

. II. Spatial variability of inoculum levels. New Phytol. 131: 461-469.

ECM harv prahipaikadel, sagedam normaalsel alal AUS troopikas

orrhizas in forestry and agriculture. ACIAR Monographs 21: 1-374.

stinellus meruloides) and an aphid parasitic on ash tree roots. Symbiosis 3: 315-320.

varakevadised varakevadised taimed ilma Amta

tol. 154: 275-304.

mükoriisa evolutsioon

Rev. 79: 473-495.

Mükoriisa definitsioonid. Paljud EcM raportid on tegelikult 'beaded VAM'

86% taimeliikidest mükoriissed, sh 74% AM, 9% OrM, 2% (6000 liiki) EcM, 1% ErMülevaade taimesugukondade ja elutüüpide kaupa: NM pms

ry inoculation of Eucalyptus seedlings in western Australia and Southern China using spores and mycelial inoculum of diverse ectomycorrhizal fungi from different clima

relationships of the Caesalpinioideae (Leguminosae) as inferred from DNA sequence data. Mycol. Res. 106: 105-114.

der seedlings. Eur. J. For. Path. 20: 430-435.

e roots of trees from the Alps: reliable and fast DNA extraction and PCR-RFLP analysis of DNA extracted from roots of trees. Mycol. Res. 106: 105-114.

gilises lepikus: palju saprotroofe, vähe ECM, üsna erinevad ECM liigid

: intraspecific tulu juured: 56% ül 25 cm; 44% 25-150 cm; taimendiivide peen juurte genetiite määramine SCAR markeritega

istuliniforme ectomycorrhizas. New Phytol. 177: 586-588.

orrhizal structure and growth of Picea abies (L.) Karst.

Alnus crispa in Alaska. Mycologia 81: 667-676.

Lepal Alaskal 2 uut Russula liiki, mi

d

iversity of ammonia oxidizer 16S rRNA gene sequences in native, tilled, and successional soils. FEMS Microbiol. Ecol. 45: 105-114.

angens genetiid enne ja peale tulekahju: täielik kontrast-suured vanad genetiid aser AFLP

E, FESIN, and frontiers in fungal ecology. New Phytol. 177: 586-588

õngut viljuvad 2 a pärast Chroogomphus, Suillus, pungens, Coltricia perennis, Hebeloma crustulinif. 5 a pärast lisanduvad Rhizopogon spp, Amph

engut viljuvad 2 a pärast Chroogomphus, Suillus, pungens, Coltricia perennis, Hebeloma crustulinif. 5 a pärast lisanduvad Rhizopogon spp, Amphinema byssoides

mmunities: what do the exceptions tell us? Integ. Comp. Biol. 42: 352-359.

ck NP. 2008. Inoculum potential of Rhizopogon spores increases with time over the first 4 yr of a 99-yr spore burial experiment. New Phytol. 181: 463-470.

ophic plants stimulated by fungi isolated from the adult plants. Mycol. Res. 148: 335-342.

nt advances and future directions. Can. J. Bot. 82: 1122-1132.

misidentifitseerimine, ITS vs LSU vs valgud; bayes vs par

skaalas ECM diversiteedi põhjustaja

tzer A; Garbelotto M, Li Y. 1998. A sequence database for the identification of ectomycorrhizal fungi. Mycol. Res. 102: 105-114.

atodes, mycorrhizal fungi, nematodid vs ECM vs taimed: ülevaade; taimed võivad mõjutada ECM seente kasvu ja nematoodide vältimist

si. 7: 123-129.

es on mountainsides: contrasting elevational patterns in bacterial and plant diversity. Proc. Natl. Acad. Sci. USA 105: 11505-11511.

Mantel test kooslust

enekoosluse struktuuris. Proove vaid 10

markers in a population of Picea abies. Mol. Ecol. 11: 305-315.

RAPD autokorrelatsioon kuusel

ed spacer (ITS) of rDNA genes in fungal communities in a southeastern U.S. salt marsh. Mycol. Res. 106: 105-114.

emaa torikute nimestik, sh Coltriciella dependens, Coltriciaperennis, cinnamomea, sapincta, strigosa

kortikoidide biogeo AUS ja ümbruses: kortikoididel endeesust keskmiselt, igatahes palju v laia levikuga lii

; in ectomycorrhizal fungi: an X-ray microanalytical study. Mycol. Res. 103: 31-39



carbohydrates in mycorrhizal roots of *Populus tremula* × *Populus alba* and the implications for transfer processes in ectomycorrhizal associations. *Tree Physiol.* 21: 101–107.  
species richness of pitcher plant food webs. *Ecol. Lett.* 6: 825–832.  
Il HV, Damschen EI, Grytnes J-A, Hawkins BA, McCain CM. Fungal diversity in a boreal forest: implications for the role of fungi in ecosystem functioning. *Plant Soil.* 321: 1–12.  
e zoo: an overview of plant-associated communities of microorganisms, including phages, bacteria, archaea, and fungi, and some of their structuring factors. *Plant Soil.* 321: 1–12.  
rend: *Clavulina*, *Cenoc*, *Lactarius*; talvel *Clavulina*, *Russula*, *Lactarius*, *Tomentella*; suvel *Clavulina*, *Cenococcum*, *Lactarius*, *Hebeloma*.  
ntial metabolic activity of the ectomycorrhizal community in a beech (*Fagus sylvatica*) forest subjected to two thinning regimes. *Mycorrhiza* 15: 235–245.

rikastes metsades Euroopas ja Põhja-Ameerikas. Pms lepaga seotud seened, mõned metsatüübid täiesti EcM seenete vabad. N-Am ja P-Eur seened 80% sarnased  
rion. *Curr. Opin. Microbiol.* 8: 362–369.

l + kultiveeritavad liigid NZL sissetoodud Tuber: 5 liiki Euroopa puudel + kultiveeritavad liigid

endophytes in a multitrophic interaction. *Oikos* 102: 491–496.

und-induced resistance and constrains tolerance in a grass. *Ecology* 85: 679–685.

luctivity and phenology. *Front. Ecol. Environ.* In press.

otina using sterile distilled water in cryovials. *Mycologia* 86: 275–280.

ogeous species of *Geopora* (Pezizales). *Mycologia* 60: 496–525.

gions of Africa Aafrika taimkate Aafrika taimkate

to increase growth and phosphorus uptake of *Eucalyptus globulus* and *E. diversicolor*. *Plant Soil* 153: 155–164.

ities associated with the roots of Douglas fir (*Pseudotsuga menziesii*) colonized by different ectomycorrhizal fungi. *Plant Soil* 153: 155–164.  
roll: *Tomentella* sp., *Cenoc*, *Rhizogogon* sp.

vironment infl juure-seened põõgi-vahtra segametsas: kooslust mõj enim taimkate ja mulla-toitained NMS põhjal

fication in single and pooled root samples: terminal restriction fragment length polymorphism (TRFLP) analysis. *Plant Soil* 153: 155–164.  
T-RFLP kvantitatiivne kasutamine: leiti et 3 dominantliigi

izal fungi: a possible source of Fenton radicals during the degradation of lignocellulose. *New Phytol.* 139: 637–645.

d ericoid mycorrhizal fungi. *Mycorrhiza* 12: 105–116.

ork. *Ch* 11, 12.

seente liigikontseptsioonid ja spetsiaalsed

otropical rainforests. *Phil. Trans. R. Soc. Lond. B* 359: 1595–1604. Lõuna-Am vihmametsad: taimkate kriidist tänapäevani. Kriidis vähe teada, vihmametsade kõrgaeg arv eots

ting in eastern oak forests on *Armillaria* spp. and a competitor, *Megacollybia platyphylla*. *Can. J. For. Res.* 29: 347–355.

I. 2010. Impact of wildfire return interval on the ectomycorrhizal resistant propagules communities of a Mediterranean open forest. *Fung. Biol.* 114: 628–636.

ei erinenud oluliselt liikide poolst ja põlengutel polnud mõju

itud jämejuuri nn valkja kattega. Identif septade ultrastr järgi. Mantel paks, Hartigi võrgustik vaid 1-kihiline!!!; väidet ECM. Sek koloniseeris ka kandseene ECM -hartigi v  
askultuuris Pax > Cyl > Laccaria; Cyl inhibeerib mõlemil, eriti Laccarial ECM teket -mantel on õhem ja hartigi võrgustik on imelik. Cyl tungib läbi Laccaria mantli, ent mi  
rhizas of *Morchella elata* with *Picea abies*. *Mycorrhiza* 4: 223–232.

1136

a community-focused living review of multivariate data analyses. *FEMS Microbiol. Ecol.* 90: 543–550.

melaniinid multivariaat-tehnika

r. (Amylocorticiales, Basidiomycota) from New Caledonia. *Crypt. Mykol.* 33: 453–461.

frican woodland. *Kew Bull.* 54: 675–681.

ine between *Russula* and *Lactarius*: the dilemma of *Russula* subsect *Ochricompaetae*. *Fung. Div.* 28: 15–40.

Multifurca gen. Nov. Sisaldab 1

h Anisoptera (Dipterocarpaceae) in Papua New Guinea. *Aust. Syst. Bot.* 12: 727–742.

Russula rõngaga uued liigid PNG dj

esk-ja lääneosas. *Cortinarius*, *Hebeloma* pole teada, *Inocybe* va Aafrika kesk-ja lääneosas EcM seentel. *Cortinarius*, *Hebeloma* pole teada, *Inocybe* vaid noortes metsades.

col. Res. 111: 787–798.

Lactarius liigid Aafrikas ja madagaskaril enamasti identsed. ITS peaaegu identsed. ITS peaaegu identsed. Paljud kasvavad nii vihr  
iscariil: Eukalüptidega on koos palju seeni, mida pole Austraaliast teada ja mis tunduvad olevat Aafrika päritolu. Malagassid on viimase 60 aastaga  
harellus (Basidiomycota, Cantharellaceae) in Tanzania. *Nova Hedw.* 71: 491–502.

Suilloid2; vanas metsas Suilloid, Tricholomataceae, *Cortinarius*; kottseeni rohke ITS1-ITS4B kandseente marker, ITS1F-ITS4 kottseente marker (multivar, x2

Gnetum gnemon Sumatral mood eksperim EcM Scleroderma sinnamariensega, mis soodustab taimede kasvu  
result in higher Fungogeneetilise diversiteedi mõju võib olla tugevam kui liigirikuse mõju taimede produktsioonile kooslustes

influence the strength of competition among vascular plants? *Persp. Plant Ecol.* 10: 41–50.

tomycorrhizas. II. Carbohydrate allocation in ageing *Picea sitchensis*/Tylospora fibrillosa ectomycorrhizas. *New Phytol.* 122: 153–158.

For. Res. 37: 207–215.

an important concept for a functional understanding of the ectomycorrhizal symbiosis. *New Phytol.* 134: 685–695.

l vaga. *Mycol. Res.* 91: 764–767.

udy of the internal structure of mature linear mycelial organs of four basidiomycete species. *Can. J. Bot.* 67: 2266–2271.

l saprotrophs: implications for decomposition of organic matter in soils and degradation of organic pollutants in the rhizosphere. *Can. J. Bot.* 80: 803–809.

rsh edaphic conditions. *Eur. J. Soil. Sci.* 54: 735–740.

hartigi võrgustikuga), kuusel (hartigi võrgustik nõrk, transfer-rakke pole) ja eukalüptil (ei moodusta)

iding functional diversity in ectomycorrhizal fungi. *Mycorrhiza* 9: 125–135.

of carbon dynamics in forest soil. *Soil Biol. Biochem.* 47: 198–208.

Türgi: palju valetateid EcM kohta. Väidet *Myrtus*, *Pistacia* (Anacardiaceae), *Rhamnus*, *Vitis*, *Helianthemum*, *Polygonum equisetiforme*, *Trachome*  
Cadophora

by dark-septate, root endophytes. *Mycologia* 92: 230–232.

ental samples using DNA microarrays. *J. Microbiol. Meth.* 53: 235–243.

liikide identifi liikide identifitseerimiseks: PCR amplifitseeri

oli O157:H7 using multiplexed PCR and nucleic acid microarrays. *Int. J. Food Microbiol.* 67: 71–80.

E.coli 100nu rDNA, oligonu probed 25-36 nu

LE INVADER AM seenete tapmine benomüüliliga soodustab invasiivse *Centaurea* sissetungi konkureerides mõne taimega, samas vähendab seda mõne muu taimega konkure  
lant invasion. Centaurea vohamine Ameerikas (pärist Euroopast) võib olla seotud AM-seentega, mis pole peremehe-spets patogeenide puudumisega A

nd diversification in a biodiversity hotspot: the California floristic California loomade väga kiire divergeerumine tänu mäetekkete protsess California loomade väga kiire diverg  
osphere on the functional diversity of soil bacterial and fungal communities from a forest stand in relation to nutrient mobilization processes. *Microb. Ecol.* 54: 567–577.

of heterogeneity in spore progenies and sexuality in the genus *Agaricus*. *Mycol. RAPD: 10 praimerit*

homo vs heterokaartiin

as by dark-septate, root endophytes. *Mycologia* 92: 230-232. **Phialocep**

ing of a new peroxidase found in lignocellulose cultures of *Pleurotus eryngii* and sequence comparison with other fungal peroxidases. *FEMS Microbiol. Lett.* 19: **VP klon**

ion of a versatile peroxidase involved in the natural degradation of lignin that has both manganese peroxidase and lignin peroxidase substrate interaction sites. *J. **VP, MnP,***

Gentianaceae: *Bartonia virginica* and *Obolaria virginica* as case studies. *Am. J. Bot.* 97: 1272-1277.

; the carbon cost of mycorrhizas in the green orchid, *Goodyera repens*. *New Phytol.* 180: 176-184.

re from plant-fungus carbon and nitrogen transfers in the green-leaved terrestrial orchid *Goodyera repens*. *New Phytol.* 171: 405-416.

hid *Corallorhiza trifida* derives little carbon through photosynthesis. *New Phytol.* 183: 358-364.

nial relationships within Orchidaceae. *Mol. Phyl. Evol.* 31: 1157-1180. **Orchidaceae** psaB ja rbcL. Basaalised h:

**Pyrola picta** on parasit ja **P. Aphylla** on selle ekstreemne variant

Miombo wood **miombo ökosüsteemide majanduslik tähtsus aafrikas kõrge: mesindus, seemed. Palju LK ja demogr probleeme, korruptsioon**

34: 87-108.

st: a flexible tool for aligning sequences to a template alignment. *Bioinformatics* 26: 266-267. **PyNAST · PyNAST - väga kiire**

itive liverwort *Haplomitrium* harbour a unique type of endophytic association with aseptate fungi. *New Phytol.* 160: 185-197.

R. Soc. Lond. B 266: 1221-1225. **diversifitseerumine** kiirem troopikas kui parasvöötmes

a P, O'Connor **taimede elurikkuse mõju ökosüsti funktsioonidele ja liigirikkusele: biomass, prod, lagun kasvavad, toitained ammenduvad kiiremini; ve**

eau C. 2006. **Eluigilise mitmekesisuse mõju ökosüsteemile on** selektiv sampling effectiga -s.t. Sõltub kõige efektiivsemast liigist koosluses. S.o. Sarnane v erinevates süstee

i fibrillosa poolt, ent vähendab *Lactarius rufus* arvukust juurtel ja viljakehadena

r moss ecosystem **hüüfid on võimelised elus-samblast toitaineid välja imema**

make a mista(g)ke: is tag switching an overlooked source of error in amplicon pyrosequencing studies? *Fung. Ecol.* 5: 747-749. □

ara-Kobresia myosuroides tundra plant community. MSc. Thesis. University of C **2 RE, sekv ITS**

ata K, Konno H, Muramatsu M, Hayashizaki Y. 2011. Balanced-size and long-si: **kloneerimine: eriti pikkadel juppidel pikkuse hälve**

and ecosystem ecology. *Ecology* 77: 677-680.

and ecosystem ecology: reply. *Ecology* 80: 1085-1088.

2008. Population evidence of cryptic species and geographical structure in the cosmopolitan ectomycorrhizal fungus, *Tricholoma scalpturatum*. *Microb Ecol* 56: 513-524.

2008. Population evidence of cryptic species and geographical structure in the cosmopolitan ectomycorrhizal fungus, *Tricholoma scalpturatum*. *Microb. Ecol.* 56: 513-524.

324.

S1316-1324.

10. Low pore connectivity increases bacterial diversity in soil. *Appl. Environ. Microbiol.* 76: 3936-3942.

a aladel (kultuur + ITS region): odrapõllul ja nisupõllul eri seemed, nisul sõltusid **mikroseened odra ja** nisujuurtes erineva maakasutusega aladel (kultuur + ITS region): od

arbuscular my **network AM vs taimed: kas co-occurrence** on interakts? Interakts puhul peab olema tõestus selle kohta otsene;

hizal fungal effects on the bioavailability and mobilization of soil P in the rhizosphere of *Pinus pinaster*. *New Phytol.* 163: 177-185.

ycota), a new sequestrate taxon from Belize. *Mycotaxon* 100: 289-294. **Mayamontana** gen nov maa-alu

nance of Douglas-fir nursery stock inoculated with *Rhizopogon* spores. *Can. J. For. Res.* 15: 613-617.

tripoideae in Oregon. *Mycologia* 77: 499-502.

Basidiomycotina, Tricholomataceae) and *Horakiella* gen. nov. (Basidiomycotina, Sclerodermataceae). *Aust. Syst. Bot.* 5: 639-643.

biography of type descriptions of Ascomycotina and Zygomycotina. *QQQ*

gen. et sp. nov., a new truffle-like fungus from the Sierra Nevada. *Mycotaxon* 55: 185-188. **nimekiri AUS maasisestest Pez**

iiiki, *Cenococcum* I, *Entoloma* I **Amogaster** gen nov California I

**lydnobolites**, *Pachyphloeus*, *Tuber*, *Elaphomyces*, *Melanogaster*, *Hymenogaster*, *Rhizopogon* jt Mehiko tamme-männi segametsades

*dotsuga menziesii* and *Tsuga heterophylla* seedlings. *Grown in Oregon Coast Range Soils. Mycorrhiza* 6: 65-67.

rhiza 2: 153-156.

ad. *Sci.* 106: 12794-12797. **taimede barcoding: soovit matK ja rbcL**

tonia solani AG-3 from potato and tobacco in North Carolina. *Mycologia* 94: 43 **AFLP: Rhizoctonia solani-Thanaephorus** AG3 erista **AFLP: Rhizoctonia solani-Thanaep**

logia 138: 5-12.

ñilia sp-I obs+illustr; *Balsamia platyspora* obs

sum. *Agric. Ecosyst. Environ.* 28: 55-58. **network-analüüs mik**

xisting microbes from environmental and whole-genome sequence data. *Genome Res.* 20: 947-959.

o evaluate the causes and consequences of arbuscular mycorrhizal community structure. *New Phytol.* 194: 307-312.

lophyte *Frankia*. A review. *Symbiosis* 51: 201-226.

enet. 21: S56-S60. **inimpopulatsioonide levik, geneetilir**

izal fungi and ectomycorrhizas. *FEMS Microbiol. Rev.* 22: 21-44.

ton B. 2002. An update on nutrient transport processes in ectomycorrhizas. *Plant Soil* 244: 165-175.

g amino acid uptake by the ectomycorrhizal fungus *Paxillus involutus*. *Mycol. Res.* 99: 1131-1138. **aminohap**

nical evidence of manganese-dependent peroxidase activity in *Tylospora fibrillosa*. **MnP Phanerochaete** vs *Tylospora* **MnP tõest**

**Pisonia grandis**: 2 liiki Thelephoraceae 7 Austraalia korallsaarel

**Pisonia-thelephoroid** **Pisonia-thelephoroid**

the direct detection of 16S rRNA on planar oligonucleotide microarrays. *Appl. Environ. Microbiol.* 69: 2950-29 **16S rRNA 2 16S rRNA** 2 bakteriperek kummagi 5 liigi ide

lose allies as inferred by analyses of ITS sequences and AFLP. **Tricholoma mats AFLP: Tricholoma matsutake** **molekulaarne** kell ja kor

**ljakehi tohtul**-arv saab kohalikust mullast lisa C-ühendeid

ossible means to control *Armillaria* root disease. *Can. J. Bot.* 78: 129-134.

ggi on dilute agar. *Mycologia* 82: 526-527. **Barcoding** geeni valik taimedel ja seentel: mt vs tu

es. I. Role of ecto- and endomycorrhizal fungi and *Frankia* on the growth performance of *Alnus incana*. *Plant Soil* 118: 145-150.

ing synthetic ecology: a database system to facilitate complex ecological meta-analyses. *Bull. Ecol. Soc. Am.* 91: 235-243. **MycDB** andmebaas

like genes in ectomycorrhizal basidiomycetes and transcriptional regulation by nitu comp RT-PCR **lakaas: ec**

oroid, *Dermocybe*, *Russula*; peale põlungut: *Eurotiales* spp, *Dermocybe*, *Helotia* **PCR from soil, cloning, sekv**

s production by Australian *Pisolithus* ssp. Isolates. *Mycorrhiza Online*

lignin peroxidases and manganese peroxidases in ectomycorrhizal fungi. New Phytologist 187: 1033-1042. **lignini peroksidaasi** ja mangaani peroksidaasi geenid **lignini ja** (Pectinase) inferred from three chloroplast datasets and its systematic implications. Taxon 59: 29-37. **Salix: atpB-rbcL** on hea: jagun

lules from Hippophae rhamnoides L. Botany. 86: 240-247.

Li X, Jia X, Lin Y, Leon C. 2010. Validation of the ITS2 region as a novel DNA barcode for identifying medicinal plant species. PLoS One 2010: e8613.

vascular mycorrhizae: VAM vs ECM

inoculating plantations in South China: effect on Scleroderma on colonization and growth of exotic Eucalyptus globulus, E. Urophylla, Pinus elliottii, and P. Radiata. Mycologia 152: 1033-1042. **ma 3 spp., Pisolithus 2 spp., Laccaria 2 spp domin; + 2 liiki Amanita, 2 liiki Russulat**

from sequences of nuclear ribosomal DNA ITS Region. Int. J. Fungal Genetics and Evolution 62: 1033-1042. **Alnus: subg. Alnobetula** on basaalne

**Alnus: subg. Alnobetula** on basaalne

as inferred from DNA sequences, morphology and paleobotany. Am. J. Bot. 90: 1033-1042. **ITS, rbc: betulaceae**

**Betulaceae:** pärit hiliskriidist; kask ja

king and reading microarrays. Nature Genet. 21: S15-S19.

**ARRAY** meetodika ja töö: ülevaade, pildid

Abell B, ed. The Miombo in Transition: Woodlands and Welfare in Africa. Pp. 175-193.

nutrient status: Zambia miombo: puude mahavõtt suurend rohu biomassi, arv. Et põllustamine on ohtlikum kui raie pinnase org-aine seisukohast

tenure and use of miombo: laastades muutub puude tihedus ja tood miombo: laastades muutub puude tihedus ja toodang, loomulikult esinevad tulekahjud

invaded by exotic pines. Oecologia (Berlin) 59: 239-245.

fungi within the ECM vs AM Eukalüptidel

vi kõdukihiga aladel

tüübid: Tüüp1 = Cenoc; Tüüp6 = Octavianina

9-234. **eukalüpti 2 liigi isendite juured kattuvad kõvasti; kummalgi puul c kromatograafia abil juurte määramine**

: 103-111. **Eukalüpti EcM seened eukalüpti liikide vahel ei vali, ent mändi ei nakata. Samuti ei lähe eukalüptile Suillus ja Rhizopogon**

nal transcribed spacer (ITS) should be incorporated into the core barcode for seedling identification of taime (er õistaimede) triipkoodistamiseks. **taimede (er õistaimede) triipko** oodistamiseks. Eri liianid eelist eri peremehi, er peenemaid pui

typical evergreen forests in the tropics: liianid diversiteet indias sõltub metsamaj intensiivsusest. Eri liianid eelist eri peremehi, er peenemaid pui

**1-2 kb** genoomifragmentide omavah hübriidist

zation by using genome fragments and DNA microarrays. Appl. Environ. Microbiol. 67: 3677-3682.

ontrols on bacterial community structure: microbial network analysis of bacteria, T4-like viruses and protists. ISME J. 8: 816-829.

ter Braaki co-corresp

ols of bacterial community structure: microbial network analysis of bacteria, T4-like viruses and protists. ISME J. 8: 816-829.

Ramaria morfotaksonoomia

omphales). Zeitschrift für mykologie, Band 71/1: 7-42.

s" und die Keimung von Piroloaceen. Beih. Bot. Centrabl. 38: 115-158.

l diversity in the Arctic is not fundamentally different from that of Douglas fir in New Zealand. N. Z. J. For. Sci. 9: 344-347.

ZL

seudotsuga)

aria laccata, Hebeloma crustuliniforme and Rhizopogon species on growth of radiata pine seedlings. N. Z. J. Bot. 23: 417-424.

oslus muutub ja laguens aktiivsus kasvab; =3 tõusuga kooslus muutub ja ens aktiivsus kahaneb

ns of Chimaphila japonica and Pyrola japonica (Pyrolaceae). Isr. J. Plant Sci. 44: 259-271.

rom Pectelis susanna (L.) Rafin (Orchidaceae), a threatened terrestrial orchid in Thailand. Mycorrhiza, in press.

te viljakahadega seened: Austraalias leiti korraga üle 150 uue liigi; provialade uurimine inimtundides

. Peaaegu kõik maasiseste viljakahadega

lutionary, and **mükofaagia levik loomadel. Obligaatsed vaid 3 liiki: 1 N-Am, 2 Austr -neil arenenud eesmagu eoste ferenteerimiseks. Ainult nendel pos energiabilanss vaid**

mnopaxillus (Basidiomycota, Austropaxillaceae). Aust. Syst. Bot. 14: 273-281.

**Gymnopa**xillus Lõuna-Ameeril

asuring net primary production: **produktiooni mõõtmine: maa peal ja maa all on väga palju komponente ja pot artefakte. Ei paku ka lahendust**

ucture. Aust. J. Ecol. 18: 117-143.

atamist ja soojendamist, arvukus korrel nitraadi rohkusega. Aeg (juuni vs juuli vs august) mõjutab mõne liigi arvukust oluliselt. Kokku 11 liiki, neist 5 Tom+Thelephora, lisa

saproobid; 5 **taimejuurtel ja EcM ning ErM seentel oluline roll C ladenemises kui ei põle**

vuti ja eri moodi põlenud ja põlemata aladel

rhizal abundance after long-term fertilization and warming of two arctic tundra ecosystems. New Phytol. 171: 391-404.

ndent N uptake: **peamine osa mulla N-st liigub taimedesse läbi mikroobide. EcM mütseel võttis üles ka glütsiini ja toimetas seda taimedesse.**

hiz vinicolor, PsTom tristic, eemal Rhiz rudus, R. Vinicolor, PsTom tristic, Tuber aff borchii. Huvitav Peziza limnaea LSU 99%

, Pezizales sp. (5st 3 Pezizalesed); kasvuhoone: Wilcoxina, Tomentella ellisii, Thel terrestris, Rhizopogon spp.; >16m Rhizopogon spp, Tuber sp (endine), PseudoTom tris

10-24 liiki

. 2007. Integration of biological networks and gene expression data using Cytoscape. Nat. Protoc. 2: 2366-2382.

network anal: Cytos

evolution of Entolomataceae. Persoonia 23: 147-176.

**Entolomataceae:** perek Clitopil

**bakterite** fylogeneesi ja systemaatika

otus ostreatus peroxidases are differentially attacked by Mn2+. Environ. Microbiol. 152: 1033-1042. **RT-PCR MnP transkriptide** mootmiseks

i juurte püro EcM seente uuringuteks; tuvastasid ka Oomycota ITS6-ITS7 primeritega

**Phytophthora** praimerid ITS6-ITS8 on mittespetsii

B. 2014. Leaf and root-associated fungal assemblages do not reflect soil fungal communities: **lehtede ja juurtega assots seente liigirikkus ei muutu kõrgusgradiendil. Juuri mõj ruum 45%**

, McGarrell SM, Marsh T, Garrity GM, Tiedje JM. 2009. The Ribosomal Database Project: improved alignments and new tools for rRNA analysis. Nucl. Ac. Res. 37: D1

es in filamentous fungi. Fung. Gen. Biol. 24: 86-100.

ikaryotes? A DNA guide. Mol. Phyl. Evol. 50: 197-203.

**Barcoding:** pakuvad ITS2 kui sobilikku kõigile eukarüootidele, kuna sel on k

sed seened: eri eelistused raie suhtes, üldjuhul raiudes diversiteet ja biomass vähenevad

: Kjeldsenia aureispora gen. et sp. nov., a truffle-like fungus in the Cortinariaceae. Mycotaxon 55: 175-178.

**Kjeldsenia** gen nov, arv EcM C

im

, Lact hepatic, Cenoc; mänd: Rhizop, Suill varieg, Lact hepat, Suill bov, Thel terr; vanadel puudel domin Lact hepat, Russ emetic, Cenoc. Lact rufu

otypes and the **limiteerivad toitained mõj mükoriisa kasutegurit. AM on pos mõjuga kui N/P üle 14. AM pos efekt kaob kui P-rikast mulda N-vätatd**

. Ecol. Res. In press.

**barcoding:** isendi määramise ja liigituvastamise ni

lutionary adaptation to Zn toxicity in populations of Suilloid fungi. New Phytol. 162: 549-559.

im of ectomycorrhizal fungi and the growth response of Pinus sylvestris L. New Phytol. 120: 127-135.

s of two ectomycorrhizal and a leaf saprotrophic basidiomycete colonizing beach leaf litter. *New Phytol.* 133: 133-141. vs ECM v

phorus uptake rates in mycorrhizal and non-mycorrhizal roots of intact *Pinus sylvestris* seedlings. *New Phytol.* 143: 589–597

ralization from beech leaf litter colonized by ectomycorrhizal or litter-decomposing basidiomycetes. *New Phytol.* 134: 123-132.

igisisene ISSR; normaalne vs metallireostusala ISSR: 3 praimerit

eography of sp liigirikkuks on suurem madalamatel laiustel (Rapo liigirikkuks on suurem madalamatel laiustel (Rapoportri seadus) ja madalates mägedes, sest need hõlmavad n

ncidence-based species accumulation curves. *Ecology* 85: 2717–2727.

pecies from samples. Version 8. Persistent URL <purl.oclc.org/estimates>.

cM liikide arv 230 liiki, domin Russula+Lact, Cort, Inocybe, Amanita, Hygrophorus, Hebeloma. 35 liiki on Cistuse-spetsid: sh Cort, Lact, Russ, Inoc, Hebel jt

rhizal fungal diversity: a continuous challenge. In: ... EcM eluviis on taimedel tekkin

rhizal fungal diversity: a continuous challenge. Pp. 165-200 in Pagano, M.C. [editor] *Mycorrhiza: Occurrence in Natural and Restored Environments*. Nova Science Publish

efaciens-mediated transformation as a tool for insertional mutagenesis in the symbiotic ectomycorrhizal fungus *Hebeloma cylindrosporum*. *FEMS Microbiol. Lett.* 220: 14

arch. *New Phytol.* 164: 11-14. Vahemeremaad, Kanaari saared jms taimede BD tsentrina: refuugiumid, endeemid, reliktid, välja ja sisserä

r permanent fi tree diversity network: metaandmete standardid ja nende tähtsus globaalseteks uuringuteks

Plant diversity and complexity patterns: local, regional and global dimensions. *Biol. Skrift.* 55: 565-582.

oidne seen eel kolonisatsioon sõltus kōdutuubist; maapinna kulukotte juured ei koloniseerinud. Eri dominandid erineval kōdul: suilloidne seen domineeris männikastel

ir areas of endemism, and cladistic biogeography. *Aust. Syst. Bot.* Paljasseemnetaimed: enim endeeme S-Hiinas. Sh Kolumbias perek. *Chigua*

lasmid-based 16S–23S rDNA intergenic spacer region array for analysis of microbial diversity in industrial wastewater. *J. Microveebakterite IGS: palju varieeruvad ja see*

, problems and practicalities. *Curr. Opin. Biotechnol.* 14: 311–318. array keskkonnaproovidest: identifitseerimine

epresents a post-Gondwanan radiation. *Proc. R. Soc. B* 272: 25 *Nothofagus* u 84 MYA; *Fagales* u 90 MYA; *Nothofaguse* pr *Nothofagus* u 84 MYA; *Fagale*

logeny of *Phytophthora* and related oomycetes. *Fung. Genet. Biol.* 30: 17-32. *Phytophthora* jt oo *Phytophthora* jt oomütsetide fi

mārgala connecticutis: *Populus deltoides* ja *Salix nigra* mood nii EcM kui AM

agus in the Southern Hemisphere. *MycKeys* 3: 13-22.

EcM seened EcM seened väidet. Kolonis sõnjalgu NZL kui läheduses on *Nothofagus* v mänd. Kultuuridega nakatamine ebaõnnestus; leptospermu

udying niche conservatism. *J. Evol. Biol.* 23: 2529-2539. fülogeneesi fülogeneetilise signa

sendite geneet kaugus (Mantel) ja puu-siseselt lehtede kaugus

l. *Ecology* 70: orav *Spermophilus* sööb palju *Elaphomyces*: eoseid ei söö, sest need ei seedu; seedib kitiini, seenes palju kättesaamatut N

l comparisons troopilised ökosüüsi eri mandritel on oma funktsioonid troopilised ökosüüsi eri mandritel on oma funktsionaalsete gruppide poolest erinevad vrd varemarvatuga, san

AM, EcM, IAM, EcM, ErM puittaimed erinevad C-ökonoomia poolest – kasvukiirus, lehtede lagunemine

a wide range of temperate plant species and types. *J. Ecol.* 84: 573-582.

ot. *L'Etat* 3: 257-279.

icol. *Soc.* 49: 101-113. Congo DR: 2 liiki *Thelephora*, *Ramaria* pannaldeta liikide süsi *Gomphus*, *Clavariadelphus*, Pa

mber polymorphisms in an arbuscular mycorrhizal fungal population. *Appl. Environ. Microbiol.* 73: 366-369. 16S rDNA geeni koopiate arv kõigub AM-seentel

us is not a cost to the plant in ectomycorrhizae. *Oikos* 121: 449-463.

rosporidia-like parasites of amoebae belong to the early fungal lineage *Rozellomycota*. *Parasitol. Res.* 113: 1909–1918. *Rozellomycota*: siia kuuluvad k

(2001) and Hurlbert (1984). *Oikos* 100: 394-396. pseudoreplikatsiooni võ

ture: interannual variation and effects of atmospheric change on arbuscu AMF: CO2 mõj kooslust 3,5%, osoon 0%; ent katse-aasta mõjutab 42%. S.t. samal p

: secretion of organic matter degrading enzymes by *Lactarius quietus* ectomycorrhizas before and during bud break. *Soil Biol. Biochem.* 39: 1655–1663.

f-P, Uroz S, G ECM koosluste tähtsus metsa ökosüsteemides: mobiliseerivad elemente mullaorgaanikast, kuigi ilmselt otseselt ei lagunda polümeere; EcM see

m lilgris; A -Cenoc, Lact quietus, Russula1, Russ ochrol. Kolmel dominandil suured erinevused O vs A (Tom sublil, Tom lilgris, Tom3 O-s; Cenoc

on F. 2011. Effect of poplar genotypes on mycorrhizal infection and secreted enzyme activities in mycorrhizal and non-mycorrhizal roots. *J. Exp. Bot.* 62: 249- haava lii

ities of the dominant ectomycorrhizal types in a lowland oak forest. *Soil Biol. Biochem.* 38: 1219-1222. EcM seen

: of ectomycorrhiza communities in two forest soils using multiple enzymatic tests. *New Phytol.* 167: 309-319. eri EcM-s

2011. Carbon AM-süsteemides AM spoorid vs taimejuured vs taimelehed vs mükohe: troop MH taimedel madal N conc; 13C rikastatus sama, mis

mycelium in clonal Sitka spruce during the first growing season after planting. *Can. J. For. Res.* 20: 861-868.

: and of strands from *Thelephora terrestris* mycorrhizas. *Can. J. For. Res.* 20: 1894-1899.

of Sitka spruce and lodgepole pine. *New Phytol.* 80: 63-69.

on of Sitka spruce and lodgepole pine to waterlogged soil. *New Phytol.* 80: 71-77.

is of Sitka spruce and lodgepole pine in waterlogged soil. *New Phytol.* 90: 467-476.

Mycorrhizas: The Use of Primers to Detect Arbuscular Mycorrhizal Fungi. In: Thangadurai D, Busso CA, Hijri M. *Mycorrhizal Biotechnology*. Science Publishers, Enfield,

ic dependence of morphological traits using co-inertia prior to investigate character evolution in Loricariinae catfishes. *Mol. Phyl. Evo* fülogeneesi fülogeneetiliste dum

. Laikudes vähem liike; eriti pärast 2 a tormiheidet liikide arv väheneb noortel seemikutel

ception? *Trends Ecol. Evol.* 20: 487-494. Orhideedel on elgne eluviis petmine

4 others. 2009. Global patterns of foliar nitrogen isotopes and their relationships with climate, mycorrhizal fungi, foliar nutrient concentrations, and nitrogen availability. *Nev*

Gnetales triases, juuras, kriidis laialt levinud, hiljem kasvab koos soontaimedega madalatel laiustel, makro

alpiaasal USA Rocky Mountains: EcM taimed vaid *Betula*, *Salix*, *Bistorta vivipara*, *Dryas octop.*, ÜLEVAADE varasematest uuringutest, millest j

ordiljeerides

:caria proxima. Muuhulgas *Populirhiza nigra* (Tom) leidis vaid lagupuidus

pproaches in biogeography. *Aust. Syst. Bot.* 19: 1-10. biogeo eri valdkonnad. Oluline ühitada ajalooline ja ökol biogeo eriti looduskaitsese seisukohalt

on PH, Westot fülogeneetiline konservatiivsus bioomide muutmise osas lõuna-parasvöötme taimedel; hüpped toimuvad pigem sarnaste bioomide vah

le biomes dominated by eucalypts originated at the Cretaceous-Eucalyptus ja seotud EcM Myrtaceae tek vara-Paleogeenis. Eucalyptus ja seotud EcM Myr

parisons of molecular phylogenies across multiple taxa tell us a Austraalia kaasaegsed kooslused on tek kliimamuutuste tagajärjel. Enne 25 MAT niisked metsad *Nothofagu*

obium group (*Fabaceae: Mirbelieae*). *Syst. Bot.* 28: 705-713. *Mirbelieae* (*Gastrolobium*, *Chorizema*, *Podolobium*, *Mirbelia*, *Oxylot* *Mirbelieae* (*Gastrolobium*, *Chorizer*

tant gymnosperms compared with angiosperms. *New Phytol.* 192: 997-1009. paljasseemnetaimede kroonirül

ng evolutionary fülogeneetiline nisi konservatism: ülevaade, null-mudelid, seda põhjustavad tegurid fülogeneetiline nisi konservatis

J. Biogeogr. 28: 183-198. **Austraalia endemism**: korrekteeritud endemism parim mõde. Ei lange kokku liigirikkaimate aladega. Ende  
nd fungi: introduction. J. Biogeogr. 28: 153-155. **VIITED** mol fülogeograafiale

techniques due to rrm operon copy number heterogeneity. Biotechniques 34: 2-9. **rDNA, rRNA** geenide koopiade erinevatest arvust  
ngal foraging and decomposition. Oecologia 167: 535-545.

aadel kui metsas; koosluste vahe rohumaadel ja metsas on suurim liivasel pinnasel. Mida suurem on MAT, seda väiksemad erinevused on rohuma  
: in Tulasnella by correlating morphology and nrDNA ITS-5.8 sequence data of basidiomata from a tropical Andean forest. **Tulasnella** VK ECU, mis mood  
cation method suitable for fresh, herbarium-stored, lichenized, and other fungi. P. **DNA ekstraheerimise** uus meetod CTABi põhjal, kus muudetud on kontsentratsioone ja n  
olecular phylogenetics of Caryophyllales based on nuclear 18S rDNA and plastid RBCL, ATPB and MATK DNA sequences. Am. J. **Caryophyllales**. EcM mood klaade 3  
r mycorrhizas from enriched soil patches. I. Roots and hyphae exploiting the same soil volume. New Phytol. 133: 453-460.  
r mycorrhizas from enriched soil patches. II. Hyphae exploiting root-free soil. New Phytol. 133: 461-467.

obial DNA from soil for PCR. Soil Biol. Biochem. 30: 893-993. **DNA eraldamine** mullast: kõrged temp (70°C) ja sügavkül  
functional diversity and resilience of ectomycorrhizal community. Oecologia 161: 661-664. **EcM tipp**

**of the ectomycorrhizal fungus Suillus granulatus in a Pinus contorta (lodgepole pine) stand in Yellowstone National Park. Oecologia 158: 77-83. ARV et**  
Elaphomyces (Eupenicillium); väidet Cenoc ei talu ja Unkn1 eelistab kasvada roogitud okastega plottides. Ent analüüs on vale ja liike üldse saadi kahtlaselt vähe. Kogu ko  
osa, Piloderma sp, Cortinarius sp. **Jääb ebaselegeks, mis määral kooslus ikkagi muutus, sest alalid oli 3 ja esitati vaid kogusumma**

of Monotropoideae based on partial 28S ribosomal RNA gene sequencing. Can. J. Bot. 78: 1-2. **Monotropa**: arv koosneb kahest mor  
ocybe (K 73%), Cenococcum puudus; mujal Rhizopogon, Cantharellaceae sp. **ITS1F/4-4B 2RE**  
x2 test liikidele eraldi  
, Hygroph; liigirikkaim Cort, Russu/Lact, Inocybe **ITS1F/4B 2RE**

base: applications to ecology and evolution. Mol. Ecol. 7: 919-923. **5.8 S nu RDNA andmebaas**: taimed, seemed, loomad

ceae sp, Wilco **kõdu lisamine: suurendas kolonisatsiooni, vähendas liigirikkust**

caerulescens grupp; Monotropa hypophitys: suilloidid; M. Uniflora: Russulaceae; Sarcodes sanguinea: suilloidid, kantarellidid  
d: Agaric1, Suillus, russula. Liigirikkaim Cortinarius, Russula; kui ühe puuliigi ol **ITS1F, ITS1, ITS4, ITS4b kombin, 2RE; sekv mtDNA**

base: applications to ecology and evolution. Mol. Ecol. 7: 919-923. **5.8S nu-rDNA ITS vs 5.8S**

evoluonay studies. Mol. Ecol. 1: 233-240. **taimespets praimer 28KJ**; lihtne DNA ealdamisprotseduur: 100yl CTAB+2xkloroform  
icaceae. Can. j. Bot. 74: 1896-1909. **kanarbikulaadsed: ektost erikoidse, i**

**-Coltriciella -enamasti seotud lagupuiduga** **Coltricia-Coltriciella -enamasti seott**

of an ericoid mycorrhiza-forming fungus occur in roots of Epacris pulchella (Ericaceae) and Leptospermum polygalifolium (Myrtaceae) in an Australian sclerophyll forest.  
290 OTU), 91 RFLP tüübist sai pärast sekveneerimist 68, millest 5 ol: **DGGE (59 OTU), RFLP ( DGGE (59 OTU), RFLP (290 OTU), 91 RFLP tüü**

oreal species of Platanthera and Coeloglossum (Orchidaceae). Can. J. Bot. 68: 1171-1181.

1 orchids and a new species in the genus Epulorhiza. Rept. Tottori Mycol. Inst. 30: 43-59.

atafora JF, Straus NA. 2003. Ancient tripartite coevolution in the attine ant-micr **xxx** **Pseudoagaricus-sipelgas-parasiit, pa**

1 DM, Kerr JT, Oberdorff T, O'Brien E, Turner JRG. 2004. Predictions and tests of climate-based hypotheses of broad-scale variation in taxonomic richness. Ecol. Lett. 7:  
jaotusele, individide arvule mullas ja mol tausturingutele, dominantsusele; arvukus väikeses ja laias skaalas: ookean: 160/ml; muld: 6400-38000 **prokarüootide** BD arvut  
influence of the infection on the multiplication of viruses in tomato, petunia and strawberry. New Phytol. 72: 975-983.

**loosul: domin**. Cortinarius spp., Russulaceae **Taxotron, probleemid kott-vs-kandseened, PCR, RFLP Sörenseni I.**

y concentration in sporocarps of Suillus variegatus in seven Swedish populations. Mycol. Res. 101: 545-551. **3 RE**

s indicated by spatial distribution of fungal clones. New Phytol. 115: 487-493

**riegatus liigisisene**

, viited võimalused ülevaade, viited

erties and nutrients in a California oak woodland. Biogeochemistry 39: 45-64.

ühel organismil mitmete alleelide olemasolu, praimerite selektiivsus **erinevad PCR-I põhinevad** meetodid -limitatsioonid, ühel organismil mitmete alleelide c  
distic analysis of nuclear LSU rDNA sequence data. Mycol. Res. 104: 388-394. **Cantharellus, Craterellus, LSU. Can**

rtigi võrgustikuga. Sage rakusisene kolonis; ainult männilistel; Arbutusel puudus

e amino acid metabolism in mycorrhizal roots of Norway spruce (Picea abies). Plant Soil 173: 67-77. **N transpo**

ie. New Phytol. 113: 523-527.

x

eened mood väikese osa mullakooslusest. Juurtes AM polnud!

th and mycorrhizal development of containerized jack pine seedlings. For. Sci. 30: 828-835.

iljakehi produtseeriv), Amphinema

lophloeus, 3 muud tüüpi

vs kaevanduspinnasele ümber istutatud: inokulandid hääbuvad 3a jooksul ja kohalikud seemed votavad yle : algul E-strain; hiljem (3a) Suillus, MRA, Tuber

inevad dominandid, peamiselt siiski thelephora, E, Amphinema, MRA

te viljakahadega kottseened: Geopora ja Elaphomyces Albertas ja nende võimalikud peremeestaimed  
ornamentatsiooni ja moniloidsete klamüdosporoide järgi, hüüfiseinte ornamentatsiooni

mitterteriilses (viletsam) kk-s 2.5 g/l Glc juures. Paks mantel Pinus ponderosa, Larix laricina; rakusisest kolonis polnud. Viitab tugevale tsellulolüütilisele ja fenooloksidaa  
**v vs põleng**

loma, Suillus, Amphinema

roughput taxonomic identification tool for use with next-generation sequencing (FHTiNGS). J. Basic Microbiol. In press. **automatiseeritud mä**

ikaylo E (ed. ). Mycorrhizae. USDA Forest Service: Washington USA. pp. 114-121.

lnud konkreetset mõju; mõj pigem kude ja samblaliik. Kooslust mõj kõik parameetrid

an. J. Bot. 84: 1509-1519.

from boreal and montane bryophytes. Mycol. Res. 111: 106-116. **Cladophialophora** spp nov sam

ja aastaajast;

d the hemiparasitic angiosperm *Rhinanthus minor* during co-infection of a host. New Phytol. 139: 555-563.

## Kobresia simpliciuscula, Carex spp NM

is for biodiversity **Mida lähemal ekvaatorile, seda rohkem liike. Liigirikkus sõltus enim ala suurusest ja õhutemp-st. Ei usu liigirikkus Gondwanan disjunctions: Evidence from Malpighiaceae. Proc. Malpighiaceae on arv tek Lõuna-Am ja migreerunud läbi Lauraasia ja Põhja-Atlandi maasillega Aafrikasse Radiation of Malpighiales Supports a Mid-Cretaceous Origin of Malpighiales on tek 120 MAT, radieerunud 110 MAT, Salicaceae tek 105 MAT, Salix+Populus 50 MAT; e) among liverworts and angiosperms: phylogenetics, distribution, and symbiosis. Am. J. Bot. 90: 1661-1667.**

erwort-associated endophytes. Am. J. Bot. 95: 914-924. **maksasammalde risoidide endofüütidid: seenekooslused erinevad suureneva distantsiga, ent 1** in plant ecology. Annu. Rev. Ecol. Syst. 33: 507-559.

**ical tree family Dipterocarpaceae based on nucleotide sequences Sarcolaena (Monotes(Pakaraimaea(sg Sipterocarpus+Shorea)));** ebasobiv outgroup. Vateriaopsis kuulub D nically profitable post fire restoration with black truffle (Tuber melanosporum) producing plantations. New For. In press.

mping-based normalization strategies for tagged high-throughput sequencing datasets from gut microbiomes. Appl. Environ. Microbiol. 77: 8795-4 rarefaction mediaani iversity. Trends **mullaökoloogia ruumiline aspekt: bottom-up ja t mullaökoloogia ruumiline aspekt: bottom-up ja top-down suhted eri ökosüsteemides. Eri organismide BD g** Bezemer TM, **mullaökoloogia: fauna indutseerib taimede suktsessiooni, inhibeerides algaoskuste dominanttaimeliike** /2: 131-133.

of Laccaria bicolor in pure culture and in symbiosis with Pinus banksiana. Can. J. Bot. 73: 1768-1779.

JR. 2001. **Clit taimede regenereerumist takistab tuli, vihm ja järgnev erosioon. Vihm tasandab Helianthemumi ja Cistuse seemikute suurusjaotust**

as: pms saproobsed kandseened, siin-seal EcM seened: Russ-Lact, Ramaria, Cort, Inoc, Coltricia; muuhulgas Phellodon ja Sarcodon. Kohalikud po **andustus: Tuber 7 spp, Hymenogaster 5 spp, Genea 2 spp**

7. Trends Ecol. Evol. 20: 68-73.

**arv läbi ookeanide levimine on tähtsam võrreldes vikariantsuse ja mandritriiviga kui seni arvatud. Näited, t**

ivelihoods. Proc Nutr. Soc. 65: 190-197.

tomycorrhizas published since 1961. Mycol. Res. 109: 1063-1104.

R. 2012. Land use alters the resistance and resilience of soil food webs to drought. Nat. Clim. Ch. 2: 276-280.

of Grania (Annelida, Clitellata, Enchytraeidae), with discovery of a cryptic specie Enchytraeidae: barcoding ITS parem kui COI (sel esineb liigisis var suur)

; what did Baas Becking and Beijerinck really say? Environ. Mi baas Becking

al fungi on bir **varajase vs hilise st seened: eri kaugusel tüvest eri seened mood mikoriisat; hilisema st seened mood rohkelt EcM viljakehade all, varase st seened mitte; va**

rsen GL. 2011. PCR amplification-independent methods for detection of microbial communities by the high-density microarr **DNA ja RNA põhine PCR-vaba phyloc** gical endophytes of Dipodium hamiltonianum (Orchidaceae). Aust. J. Bot. 54: 487-491.

logy, physiology, evolution and conservation aspects. In: Hock B. (ed.) Fungal associations, The Mycota IX, 2nd ed., in press. Springer-Verlag, Berlin, Germany.

a 17: 475-486.

n California. Mycologia 95: 148-155.

corrhizal fungus Hebeloma cylindrosporum associated with Pinus pinaster. New Phytol. 105: 429-435.

ons of ectomycorrhizal fungi. In: Varma A, Hock B, eds. Mycorrhiza. ???

ilo3, Pilo4; taksonitest domin: Lactarius/Russula, Piloderma, Amphinema+Tylos; ITS1F-NL6C

e of regenerating Betula alleghaniensis and Acer saccharum seedlings in two Quebec mixed deciduous forests. Can. J. For. Res. 32: 1094-1102.

the arbuscular mycorrhizal fungi colonizing Clintonia borealis from a mixed-wood boreal forest. FEMS Microbiol. Ecol. 58: 225-235.

ca. Mycotaxon 103: 329-335.

central African edible mushroom. Cryptog. Mycol. 28: 171-176.

abedian woodland area A nutritional and ecological approach. Biotechnol. Agron. Soc. Environ. 1: 221-231.

115-433.

Collembola: süsteem, morf, 700

nus fertility on **varjutamine suurendab männi ja kase tüve pikkust, mitte kuusel; männil ja kuusel oli tugevaimaks konkurendiks kask, mis pärssis kavu enim, seda mõj. Ka h** carpacae vs Fagaceae vs Pinaceae Chiang Mai kandis: Fagaceae all kõige liigirikkam. Väidet 37/57 liiki assots vaid dipterokarpidega

si mood HN ning tapavad Casuarina equisetifolia. Eukalüpti kasv suurenes 13-32 korda, Allocasuarina max 3x, Casuarina max 2 korda. Casuarina juured tegelesid vasturea d. Arv. Et viljakehas stimuleerit kasvu ja toitainete eritamist, mis induts VK arengut ja toitaineid

**id Hiinas: Pisolithuse püsimine (moned püsivad, teisi pole tuvastatud) ITS: Pisolithus**

vogel TM. 2011. Assessing the soil metagenome for studies of microbial diversity. Appl. Environ. Microbiol. 77: **ekstraheer**mise, rakkude lüüsi ja fragmentide pikk ion as a presumptive indicator of nitrogen fixation. Bot. Gaz. 140: S65-S69.

ic patterns in *Leccinum* sect. *Scabra* and the status of arctic-alpine species of *L. rotundifoliae*. Mycol. Res. 111: 663-672. **Leccinum** sect Scabra: Gapdh annab

l host specificity in the ectomycorrhizal genus *Leccinum*. New **Leccinum: ITS2. Gapdh -omavah inkongruentsed, ITS ei suuda hästi e Leccinum: ITS2, Gapdh -omavah inl** ork analyses. BMC Bioinform. 13.113. **Leccinum: ITS2, Gapdh -omavah inl network analüüs: mč**

10: 363-369.

la seenestik sarnaneb enim AFR omadega, er saproobide osas. **Venezuela seenestik sarnaneb enim AFR omadega, er saproobide osas: Venezuela** seenestik sarnaneb enim 65.

of zinc toxicity to higher plants. New Phytol. 135: 251-257.

ie to zinc among ectomycorrhizal associates. New Phytol. 106: 535-544.

ureau P-A, Nagasawa E, Soyong K, Taylor AFS, Watling R, Moncalvo J-M, McLaughlin DJ. 2010. Molecular phylogenetics of porcini mushrooms (Boletus section Bolet NA barcode markers for mushrooms and allies. PLoS One 6: e25081. **COI vs ITS: COI amplif eri pra**

g the mycelia of stipitate hydroid fungi in soil. Journal of Microbiological Meth **spots praimerid liigsiselt Bankera, Phellodoni, Hydnellumi ja Sarcodoni liil**

evi D, Hu P, Andersen GL. 2006. Greengenes, a Chimera-Checked 16S rRNA gene database and workbench compatible with ARB. Appl. Environ. Microbiol. 72: 5069-5

. Phan, and G. L. Andersen. 2006. NAST: a multiple sequence alignment server for comparative analysis of 16S rRNA genes. Nucleic Acids Res 34:W394-9.

ber, D. Dalevi, P. Hu, and G. L. Andersen. 2006. Greengenes, a Chimera-Checked 16S rRNA Gene Database and Workbench Compatible with ARB. Appl Environ Micro

y structured environmental variation. Evolution 57: 2647-2652. **fülogen distantsimaa**

ui ka Endogonales; kumb primaarne ei teata. Järjestused nii E. pisiformiselt kui ka flammicorona rühmast. Jpt rühmadest

gastroid boletes from Thailand. Fung. Div. 37: 1-8.

boletes from Malaysia. Mycologia 100: 956-961.

**Durianella: lähedane Intsiaga s**

is väheneb; N-väet: ei muuda eriti. Mõel mõjuvad koosluse struktuurile

may increase with [www: Betula nanast liiguba C ainult Betulasse](http://www.betula-nanast-liiguba-c-ainult-betulasse), mitte Salixisse, erikoididesse ega rohttaimesse; Ledumist ei liigu C teistesse taimed  
ms (DALP) or how to get and characterize new genetic markers in many species [DALP metoodika](#) populatsioonigeneetika või kryptiliste liikide uuringuks. Fragmentid ke  
alisation in [parasiitkonservatismi parasiitoididel, lehetäidel ja peremeestaimedel: lehetäide fülogeneesil](#) oluline mõju [parasiitkonservatismi parasiitoidide](#)  
he I, Rizzo DM. 2007. The fungal dimension of biological invasions: [invasiivsed seened: ülevaldatud](#); Phytophthora infestans, P. Alni, Cryphonectria parasitica,  
and Armillaria sinapina in the central interior of British Columbia. Can. J. Bot. [Armillaria sp2](#)

productivity, and nutrients in boreal grasslands. Can. J. Bot. 82: 104-114.

lpine and boreal [AM vs ECM \(antagonistlik v.a. Hebeloma sp\) vs Rhizoctonia \(mitteantagonistlik\)](#)

[eri päritolu isolaatide erinevused viljakaha morfoloogias ja viljakahade ning EC](#) [3 RE, 9prRAPD](#)

[humicola on Picea abies](#). Nova Hedw. 84: 429-440.

survive drying. Mycorrhiza 17: 547-550.

igiumi kasvu ja nodulatsiooni; eksperim küll vildakas ja sampling efekti mõju; kõikidel juhtudel mitu liiki parem kui eri monokultuurid

-330. [lähte- ja mülgaspulatsioonid: definitsioon, areng, asukate fitness](#), kaitse: ÜLEVAADE; VIITED

estimate the proportion of Pisolithus tinctorius and Eucalyptus globulus RNAs in ectomycorrhiza. Appl. Environ. Microbiol. 63: 840-843.

estimate the proportion of Pisolithus tinctorius and Eucalyptus globulus RNAs in ectomycorrhiza. Appl. Environ. Microbiol. 63: 840-843.

aid Cenococcum kattub (sekvents 99,8% identne). Tomentella sp ja juure-endofüütil sama T-RF proovide kokkusegamiel saab vähem liike kätte k  
beech spread. Nothofaguse seemikute EcM kolonis kukub järeseult pärast 12 m; Kunzea lähedal sama mis Nothofagusele 12 m lähemal

hizal fungal communities of oak savanna are distinct from forest communities. Mycologia 101: 473-483.

ism (T-RFLP) to identify mycorrhizal fungi: a methods review. Mycorrhiza in [T-RFLP kasutamine](#) mükoriisa [T-RFLP kasutamine](#) mükoriisaseentel: ülevalde, probleem  
effects attenuate from species to ecosystem properties? A field test with wood-inhabiting fungi. Ecol. Lett. 15: 133-141.

[tamme ECM kolonis on palju tamme läh> Helianthemum läh > eemal \(>20 m\)](#)

ede läheduses

Richardson SJ. [mükoriisade suksessioon: väga erinev piirkonniti](#); suksessiooni alguses on oluline roll nähtustel dispersal limitation ja pedogenees

zanska E. 2006. Soil modification by different tree species influences the extent of seedling ectomycorrhizal infection. Mycorrhiza 16: 73-79.

s sp. Pezizales: 2sp

ITS

ikide arvelt); Laccariat rohkem ja Russulat vähem raiealal

elds and saven [tammedel suurem elumus vanade puude risosfääris](#) vrd eemal, mida seletatakse seente abil saadud suurema N konts abil; Väga oluline oli võistlus rohunditeg

[T-RFLP, 2RE](#)

[Zar, 1999 X2](#) test iga lii

A, Orwin KH, Kirschbaum MUF, Hunt JE, Burrows LE, Barbour MM, Aislabie J. 2011. Ecosystem service and biodiversity trade-offs in two woody successions. J. Appl.  
r (GERM) program. Mycorrhiza 13: 171-172. [Exceli-põhine proge](#) RFLP bändide võrdlemiseks [Exceli-põhine proge](#) RF

-233. [spetsiifilisus ja eelistus mulla ja peremeestaimede osas](#); peremees võib ka mulda mõj: nishide n dimensionaalsus.

a G. 2010. Multi-host ectomycorrhizal fungi are predominant in a Guinean tropical rainforest and shared between canopy trees and seedlings. Environ. Microbiol. 12: 2219

[ITS-RFLP, mtLSU](#) sekveneerimine; ITS1-ITS4 ei ampl Afzelia DNA

5. Contrasting responses to ectomycorrhizal inoculation in seedlings of six tropical African tree species. Mycorrhiza 16: 11-17.

ncentration of glucose and fungal inoculum influence the competitiveness of two early-stage ectomycorrhizal fungi in Afzelia africana seedlings? For. Ecol. Manage. 203:

is in leaf 13C discrimination and implications for studies of past and future climate. Proc. Natl. Acad. Sci. USA 107: 5738-5743.

[s liigisisene, vs peremeestaimed](#) ja kasvukohatüübid

[Pisolithus spp](#)

truffles (*Terfezia* and *Tirmania*), host specificity and edaphic tolerance. Mycologia 94: 247-259.

[\(Terfezia+Tirmania\)Mattirolomyces](#)

r, Labyrinthomyces, Lacc fraterna, Pisol albus, Ruhlandiella berolinensis, Setchelliogaster (kõik AUS seened). Lisaks Sebacia, Thelephora jt teadmata päritoluga seened.

as, a saprotrophic fungus and the decomposition of organic substrates in a microcosm. Biol. Fertil. Soils 4: 145-150.

rimata tüübid vähenevad

A. 2008. 15N enrichment as an integrator of the effects of C and N on microbial metabolism and ecosystem function. Ecol. Lett. 11: 389-397.

rogen stable isotope composition of leaves and roots of plants growing in a forest and a meadow. Isotopes Environ. Health Stud. 39: 29-39.

omin. Alnicol [Lepp fix 40-85 kg N/ha\\*a](#). Mullahingamine ja primprod kõrgeim lepikus vrd põõgi metsa ja põlluga. Järeld, et lepp investeerib palju C ülalpidamaks risosfää  
kvantitatiivse analüüsi põhjalsuurem aeglaselt lagunevas nisupõhus kui rukkijäär [DGGE kvantitatiivne](#) interpret [ühel bakteris](#) solaadil kuni 5 DGGE bandi

liikide ja perekondade vahel tugevad peremehe-eelistused seeneliikidel

[RDA\\_MRPP](#), indika

ngs in geographical ecology. Glob. Ecol. Biogeogr. 12: 53-64.

[ruumiline](#) autokorr: t

iguez MA, Hawkins BA. 2012. On the selection of phylogenetic eigenvectors for ecological analyses. Ecography 35: 239-249.

[fülogeneetiliste](#) eiger

nating phylogenetic inertia. Evolution 52: 1247-1262.

[PCNM-tüpi](#) PCNM-tüüpi analüü

pecific variation in quantitative traits using sequential phylogenetic eigenvector regressions. Evolution 66: 1079-1090.

[fülogenees](#) [fülogeneetiliste](#) eign

heory in geographical ecology. Glob. Ecol. Biogeogr. 17: 479-488.

[ruumiline](#) autokorr:

eated from fungi in Benin. Afr. Invert. 54: 357-371.

oma, and *Sphaerozone* (order Pezizales). Mycotaxon 12: 287-306.

4-416.

/ white rot and ectomycorrhizal fungal species and the accumulation of chlorinated benzoic acid in ectomycorrhizal pine seedlings. Chemosphere 49: 297-306. [PAH ja kl](#)

ymbioses of ectomycorrhizal fungi. Mycorrhiza 3: 63-68.

ology 24: 7. (abstr.)

American Midland Naturalist 54: 443-451.

mikroobide biogeoge: poolt ja vastunäited

analysis: a new [nishianalüüs alternatiivina PCAle ja CCAle: viited: ADE-4](#)

[nishianalüüs](#) alternatiivi

d koos seenega

trough *Arachnitis uniflora* has a unique association with arbuscular mycorrhizal fungi. Botany 87: 1198-1208.

nzalez JA. 2006. The influence of mycorrhization with *Tuber melanosporum* in the afforestation of a Mediterranean site with *Quercus ilex* and *Quercus faginea*. For. Ecol.

[Tatra mäed](#): EcM: *Dryas octop*, *Helianthemum grandiflorum*, *Bistorta vivip*, *Pinus*, *Picea*, *Salix*, *Fagus*, *Rosa* (Cenoc) ja *Sorbus* (A-type). *Pedicula*

[Tatra mäed](#): EcM: *Picea*, *Salix*, *Pinus*, *Sambucus racemosa*, *Sorbus aucup*, *Ribes* (A-type EcM)

[Tatra mäed](#): *Pinus* spp, *Picea*, *Betula*, *Salix* 2 spp mood EcM; *Polygonum bistorta* ja *verticillatum* mood AM

[Tatra mäed](#): EcM: *Picea*, *Salix*, *Fagus*, *AbiesAcer pseudoplatanus*, *Dryopteris filix-mas*, *Galium schultesii* (A-tüüp ja Cenoc); *Sorbus* NM

**Ulmus campestris** AM

**Pyrus communis** EcM, vähem AM; **Malus sylvestris** AM, vähem EcM; **Padus avium** nii EcM ja AM, illustr!

**Pyrus communis** kogu Poolas: domin AM, vähem EcM. EcM leidub sõltumata mullatüübist, pHst, muudest EcM puudest, varieteedist ja geogr asu zwojowa jego metsapuude sügavusjaotus: eripuudel eri sügavusel, kuigi enamuse pindmises 20 cm

**POL: Pinus, Populus tremula, Salix, Betula** EcM, **Lythrum salicaria** mood EcM, millel õhuke seenmantel tumedatest hüüfidest ja HN puudus (Illus mükoriisastaatus Põhja-Poola pöögimetsades. Palju paska, sest oli vilets EcM kriteerium, pidas DSE Cenococcumiks ja arv. Eksis juurte määramise mantli str järgi; Ga, Ib, Id Tomentella; Ia, Ic Tuber; Kb-Cenoc; Kc Mel. Bicolor

. Tomentella ja Cenoc pandud ühte patta (Ga)

ient allocation and mycorrhizas in Scots pine seedlings. Plant Soil 239: 173–185.

alysis of a hyp **Network-anal: seemnelevitajad Animalia**: tugevad moodulid, mis sõltuvad pms loomade kehasuurusest ja ka fülogeneet seostest in of foraging ectomycorrhizal mycelial systems in soil microcosms. Mycorrhiza 14: 37–45.

lial systems of Stropharia caerulea and Phanerochaete velutina to soil nutrient enrichment. New Phytol. 138: 519 – 531.

haria caerulea and other cord-forming, saprotrophic basidiomycetes. New Phytol. 151: 691-704.

nviron. Contam. Toxicol. 54: 507-513.

uurem väetamata heinamaadel. Efekt ka seeneliikidele: vs väetis; muld vs lehekõ **PLFA: mikroobide** biomass, seente/bakterite osakaal suurem väetamata heinamaadel. Efel nt geography. Int. J. Plant Sci. 162: S41-S52.

d the Northern Hemisphere. Phil. Trans. R. Soc. Lond. B 359: 1 **biogeograafia**: enamus taimi on Hiinast läinud üle Beringi väina NW-Am>NE Am, NW Am välja surnud; v **taimed põhjapoolkeral** perek kaup: pms jagunemismustrid SE Aasia-NE Am, kusjuures SEA on pms algk y. Proc. Natl. Acad. Sci. USA 105: 11549-11555.

of species distribution data. Glob. Ecol. Biogeogr. 16: 129-138.

i, Hirzel A, Jetz W, Kissling D, Kühn I, Ohlemüller R, Peres-Neto PR, Reineking B, Schröder B, Schurr FM, Wilson R. 2007. Methods to account **ruumiline** autokorre s of species distribution data. Glob. Ecol. Biogeogr. 16: 129-13 **ruumiline** autokorr: liigirikuse lokaalsetel andmetel tekitab kohalikul **ruumiline** autokorr: l vol. 2. Polyporales, Boletales, Agaricales, Russulales. pp. 330-333. Nordsvamp, Copenhagen.

of ectomycorrhizas in the response of Douglas fir seedlings in drying soil. New Phytol. 117: 327-334.

ynthesis in Douglas fir seedlings by some ectomycorrhizas. New Phytol. 115: 267-274.

**ynthesis in Douglas fir seedlings by some ectomycorrhizas. New Phytol. 115: 269-274**

aryons from a basidiome of Laccaria bicolor using random amplified polymorphi **RAPD Laccaria bicolor**; genetiine sidusus: palju väikeseid kromosoomse

tree. John Hop **Eukalüptide kasvatamine väljaspool Austraaliat**: kõrge produktisioon, vastuolu kohalike elanikega, inh kohalike liikide kasvu. 1828 to 177: 849-858.

biogeography, and characters associated with a radiation of the **Nyctaginaceae**: Neea, Guapira ja Pisonia sõsartakson on Pisoniella, ja **Nyctaginaceae**: Neea, Guapira ja Pisuhtas männikus domin. Cenoc, Basidiom1 (arv Inocybe), Piloderma1 K; segamets **ITS1-4B (ITS4) + 2 RE**; sekv ITS ja mtDNA

*coccum geophilum* as a model to test how species concepts influence recombination analyses using sequence data from multiple loci. Curr. Genet. 52: 191-201.

might be used to develop microsatellite markers in organisms with limited amount **AFLP põhjal mikrosatelliitmar** **AFLP põhjal** mikrosatelliitmarkerite ning SCAR praimerite ectomycorrhizal fungus *Cenococcum geophilum*. New Phytol. 166: 263-271.

gpd, ITS, CgSSU intron; , mt SSU: *Cenococcum* pu **Cenococcum**: gpd, ITS, CgSSU intru

mycorrhizal fungi: from current knowledge to emerging directions. Fung. Biol. 115: 569–597.

ycorrhizas. I. Morphological and cellular changes in mycorrhizas formed by *Tylospora fibrillosa* and *Paxillus involutus*. New Phytol. 122: 141-152.

e woodland fairy ring fungus *Clitocybe nebularis*. New Phytol. 111: 699-705.

t Sci. 157: S3-S39.

inary and ecol **liigirikuse-pindala seoseid** tugevdab enim 1) proovide pesitsi paiknemine; 2) mets, 3 ala st n. Available at <http://R-Forge.R-project.org/projects/sedar/>.

etwork for principal coordinate analysis of neighbour matrixes (PCNM). Ecol. Model. 196: 483-493.

or community and ecosystem ecology: comment. Ecology 80: 1081-1085.

r of ectomycorrhizal abundance and diversity. Plant Cell Environ. 32: 992-1003.

h BEAUti and the BEAST 1.7. Mol. Biol. Evol. 29: 1969-1973.

izal influence on hydraulic and hormonal factors implicated in the control of stomatal conductance during drought. J. Experim. Bot. 47: 1541-1550.

rRNA gene in *Armillaria*. Mycol. Res. 94: 266-269.

l fungus *Paxillus involutus*: contribution of oxalic acid. **5S rDNA** suund enamusel kandseentel ja *Armillaria* sama **oksalaat**: l

real population allocation, based on AFLP data. Mol. Ecol. Notes 2: 380-383. **AFLPOP -AFLP** markerite analüüsimisprogramm, vabavara, mahalaadimisviide

oxina

M-seentega. Diferentseerunud koed ja tugev AM-hüüfide mass **Treubia -algelisimaid maksasamblai**

ns in liverworts share the same mycobiont: isolation of the partners and resynthesis of the associations in vitro. New Phytol. 129: 439-447.

l to the nitrogen-fixing legume tree *Acacia crassiparva* A. Cunn. ex Benth. in a field experiment in Madagascar. Eur. J. Soil Sci. IP.

**Sarcoleanaceae** on ECM taimed, dipterokarpuste sõsarsugukon **Sarcoleanaceae** on ECM taimed, dipterokarpuste sõsarsugukond endenne Madagaskaril. Nende ML anali iarellus garnierii sp. nov. , une nouvelle chanterelle des maquis miniers nickélifères de Nouvelle Calédonie. Crypt. Mycol. 25: 115-125 **Cantharellus** garnierii Uus-Kaledoor

**Madagascar**: EcM puud *Asteropeia 2* spp (*Asteropeiaceae*), *Leptolaena*, *Schizolaena*, *Sarcolaena* (*Sarcolaenaceae*), *Intsia* bijuga. *Asteropeiaceae* sč vaid *Acacia* sect *Phyllodes* (syn *Racosperma*; Austraaliast) mood EcM. Koik akaatsia liigid mood AM. Ser **Senegalis** looduslikud EcM puud *Monotes*, *Uapaca*, *Caesalpinaceae*. 4 metsatüpi kus EcM sened kasvavad: troop vihmamets, sesoonne mets, savann, istandik.

1 of the vegetative mycelium of ectomycorrhizal plants. III. Ultrastructural and autoradiographic analysis of inter-plant carbon distribution through intact mycelial systems. I

**Suillus grevillei** peremehespetsiifika C-puuduses

**Suillus grevillei** peremehespetsiifika C-külluses (10g/l)

for a flexible a liigirikuse ja indikaatorliikide mõõtmine: TWINSPAN oma puudustega, uus ja plastilisem IndVal

**Arbutusel** ektendoMR, sh tuberkuloidne tüüp

overdominance in the structure of natural communities of arbuscular mycorrhizal fungi: in there a role for stochastic processes? J. Ecol. 98: 419-428.

niche and neut **AM-seentel pH gradiendiga mullas**: ohtrus kattub kõige paremini zero-sum multinomiaalse jaotusega. Võtsid arvesse ruumilist autoko ginea, *Scleroderma* polyrhizum, *Tricholoma albobrunneum*, *Tuber borchii*, *Xerocomus badius*: sünteesitud männil



rma ja *Leccinum* viljuvad 3-aastaste istikutega

rial diversity in four Arizona soils. *Appl. Environ. Microbiol.* 68: 3035–3045.

bakterid 16S rDNA

bakterid 16S rDNA: BC

nterelle (*Cantharellus formosus*) genet size using co-dominant microsatellite mar

ISSR: *Cantharellus formosus* pop-d

genepop

ndikes W AUS ja üle maailma. Maailmas domin perek *Laccaria*, *Rhizopogon*, *Suillus*, *Scleroderma*, *Tricholoma* -kokku 99 liiki, sh *Thel terrestris* ja *Cenococcum*

th ectomycorrhiza development in *Eucalyptus globulus* and *Pisolithus macrocarpus*. *New Phytol.* 165: 599–611

iem, *L. bicolor* peab mitu aastat vastu)

08. Soil factors influencing the growth response of *Acacia holosericea* A. Cunn. Ex G. Don to ectomycorrhizal inoculation. *New For.* 35: 105-117.

nmunities. In: Dighton J, White JF, Oudemans P, eds. *The Fungal Community. Its Organization and Role in the Ecosystem*. CRC Press, Boca Rayton, FL, USA, pp. 833-8:

ühimiku suurus

: by ectomycorrhizal fungi in association with Douglas fir. *New Phytol.* 127: 725-729.

ecological paradigm versus a statistical concept. *Oikos* 66:152-171.

heteroskedastilisus -tern

ts. *Ecology* 74 heterogeenses kk-s: stat analüüs, erivoimalused: blokistamine, nested analüüs, plottide summeerimine kui pole ploti efekti, heteroge

heterogeenses kk-s, eriv

ycetes, including the white rot species *Coriolum versicolor* and *Phanerochaete chrysosporium*. *Appl. Microbiol. Biotechnol.* 39: 5-10.

oksalaat:

nd ecology in the soil environment. *Can. J. Microbiol.* 42: 881-895.

oksalaadi

004. The evolution of non-reciprocal nuclear exchange in mushrooms as a consequence of genomic conflict. *Proc. R. Soc. Lond. Ser. B.* 271: 1235–1241.

ogographical dist

taimede, loomade liikuvus, kohanemisvõime on suurem, BD väiksem suurematel laiuskraadidel, sest Milankovitschi tsükel mõjutab rohkem

estone grasslar

loopealsed niidud: peale metsaraiumist taastub aeglaselt

others. 2011. The plant cell wall-decomposing machinery underlies the functional diversity of forest fungi. *Science* 333: 762-765.

pruunmä

zation of ectomycorrhizal fungi under simulated nitrogen deposition. *Mycologia* 94: 921–932.

8 RE; eristatavus; sekv *Lactar*: sõsarliigid

liigisene 5 restriktiisi; sekv liigisene varieeruvus

*Russula*, *Lactarius*

*Russula*, *Lactarius*

rinevus eri inimeste vahel ja mukoosa ning .. Vahel; uued klaadid. Kõikvõimalikud programmid BD võrdlemiseks: rarefaction, ekstrapoleerimine, rarefaction, ekstrapoleer

haw HD, Heilman PE, Hinckley TM. Eds. *Biology of Populus and its Implications for Management and Conservation*. NRC Research **Populus**: vanimad fossiilid troo

sification for *Pinus* (Pinaceae): phylogenetic tests of fossil-based **Pinus**: tek Ida-Aasias ja levinud palju kordi üle Beringi väina Ameerikas

ction fragment length polymorphism analysis of ribosomal RNA genes to assess **T-RFLP** seente SSUle 2 RE, p **T-RFLP** seente SSUle 2 RE, prair **CA T-RFLP** kvantit mu:

l. *Ac. Res.* 26: 2460-2461.

Uclust

Uclust

n reads. *Nature Meth.* 10: 996–998.

iti *Malassezia* ja *Cryptococcus*-sarn pärmid;

rgal spores along a forestry gradient – responses to habitat loss and isolation? *Oikos* 104: 35-42.

ing spore dispersal of wood-decaying basidiomycetes. *Mycologia* 95: 553-556.

**T-RFLP** mullast: **ITS1F-4B**+nested **ITS1F/4**; 3 RE: madal resolutsioon, isegi mõningaid e

ressed by computer-simulated restriction analysis of a diverse collection of ecto

**T-RFLP vs RFLP** Ektomükori: **T-RFLP vs RFLP** Ektomükoriisaseente ITS regiooni erista

spheric N deposition alters fungal community composition and suppresses ligninolytic gene expression in a northern hardwood forest. *PLoS ONE* 6: e20421.

llakiht ja peremees mõj koguseene-kooslust enim, CO<sub>2</sub> ja O<sub>3</sub> efekt marginaalne, arv mõj saproobe ja MR-seeni erinevalt

ilability in grassland. *New Phytol.* 110: 377-381.

izal fungus, *Glomus mosseae*, within plant roots by competitive polymerase chain **comp quant PCR** *Glomusele*. Heterodupleksi probleem ja lahendus

olia Nee. (Fagaceae): patterns of root colonization and effects on seedling growth. *Mycorrhiza*: accepted

3-strain fungi inferred from ribosomal and mitochondrial DNA polymorphisms. *M RFLP*

**Wilcoxina** spp: W rehmiil turbapil

rhizas. *Can. J* **ECM** sümbioos kui vastastikune parasitism ja ekspuuteerimine: sõltuvus keskkonnast, ekspuuteerimise def Bronstein2001 jr; stabiliseerivad mehhanismid: gc

rgs and postfire ascomycetes (Pezizales) in monoxenic culture. *Can. J. Bot.* 64: 2719-2725.

eds and germinants of lodgepole pine. *Can. J. Bot.* 64: 2368-2371.

*Mycologia* 78: 771-780.

pürofiilsec

. *Bot.* 73: S1415-S1422.

ülevaade eripärimet: NL6Bmun jt. Eriti just sekveneerimine annab lubavaid tulemusi i

nd its relationship to *Tricharina* (Pezizales). *Can. J. Bot.* 74: 773-779.

veidrad praimerid, *Wilcoxina*, *Trich*

**Pezizales**: arv esineb tugev kontinuum saproobidega, sest paljudel saproobsed omadused: tsellulaasid, polifenooolioksidaasid, ligninaasid, kiire kasv.

ses. Ecosystem invasiivsed liigid mõjutavad mullastiku protsesse: ÜLEVAADE. Eriti kasvab biomass, võivad tulla juurde uued funktsioonid. mändidel C ja varise hulk kasv

nd Fungal communities in identification of cellulose-responsive soils by using stable isotope probing. *Appl. Environ. Microbiol.* 2012, 78(7):2316-2327. SIP mull

*Cassiope tetragona* embraces the Arctic. *J. Biogeogr.* 34: 1559 **Cassiope** (**Ericaceae**) on pärit Beringiast, kust on korduvalt levinud välja ja nüüdki N-Am ja

2013. Genetic roadmap of the arctic: plant dispersal highways, t Arktika taimed: Eri liikidel geneetilised piirid läbivad harilikult Kesk-Gröönimaa ja Uuralid

microbial communities: the strong effect of depth on the structure of bacterial and archaeal communities in soil. *Soil Biol. Biochem.* 50: 58-65.

occurring plant eritaimedel on erinev juurte allokatsioon, juure eripind jms; erinev reaktsioon mulla heterogeensuse dimensioonidele

3. Plant diversity taimede BD mõju mullaloomadele: mõju mikrofaunale positiivne, mesofaunale neutraalne; kasut path analüüsi e structural equation m

NH<sub>4</sub><sup>+</sup> by *Paxillus involutus* in association with *Betula pendula* and *Picea abies* as affected by substrate pH. *New Phytol.* 128: 629-637.

nd Norway spr kuusk ja kask www: 13C netotransport vaid 2%, sellestki pool juurtesse; kui algul andis kuusk 100% C seenele, siis hiljem vaid tühise osa ja sai 15N vastu l

is involutus in ectomycorrhizal association with *Betula pendula*. *New Phytol.* 135: 133-142.

**Guyana keskosa** taimede nimestik: sh *EcM* puud *Pradosia*, *Papilionaceae*, *Gnetum*, *Nyctaginaceae*, *Coccol*

soils reveals speed of link between tree photosynthesis and root respiration. *Oecologia* 127: 305-308.

nsfer from *A. incana* to *Pinus sylvestris* influenced by macronutrients and ectomycorrhiza. *New Phytol.* 131: 453-459.

ation of added C<sub>3</sub> -, C<sub>4</sub> - and 13 C-labelled sugars to a C<sub>3</sub> -forest soil. *Oecologia* 131:245-249.

ria and fungi in soil profiles from three Danish forest sites. Soil mikroobide levik sigavuti mullas: Im-ni bakterite hulk väheneb 100..500x; seentel 30..70x, algloomadel 50

dimensionality of ecological networks. *Ecol. Lett.* 16: 577-583.

network-analüüs: dir

1 functioning in mullaökoloogia: ülevaade: teadmatust, funktsionaalsed rühmad, nende interaktsioon, mull takistab organismide liikumist

tive physiological studies. *Trans. Br. Mycol. Soc.* 51: 353-367.

ition. Trans. Br. Mycol. Soc. 51: 353-367.

JM, Stahl DA. 2003. Direct profiling of environmental microbial populations by thermal dissociation analysis of amplifitseeri amplifitseerimata kogu rRNA 0,5 g proovist; j

ITS1-4, 3RE

mycorrhizal Suillus collinitus strain on Pinus halepensis roots suggest successful ISSR ektomükoriisadele, SCA ISSR ektomükoriisadele, SCAR marker ühele Suillus collin  
ishop.hawaii.org/bishop/HBS/  
Hawaii eri organismidest endeemide arvukus

Dryas octopetala Euroopa levila, VIITED esmastele mükoriisakirjeldustele (Hesselman 190

nentella (7). Liikidest domin Cenoc, Lact pseudomucidus, Piloderma asp.

environmental statistika: tavaline vs Bayesia

tavaline vs Bayesia

ulation genomics and local adaptation in wild isolates of a model microbial eukaryote. Proc. Natl. Acad. Sci. USA 108: 2831-2836. populatsioonigenoomika tuvast  
es. Am. J. Bot. 74: 123-131.

assimilation and isotopic fractionation of nitrogen by mycorrhizal and nonmycorrhizal subarctic plants. New Phytol. 151: 513-524.

assimilation and isotopic fractionation of nitrogen by mycorrhizal fungi. New Phytol. 151: 503-511.

nts and a Clavaria sp. New Phytol. 84: 661-667.

y a binucleate Rhizoctonia solani-like fungus. Plant Disease 70: 148-150.

ents. Adv. Eco skaalade ekstrapoleerimine, mikrokosmoste suurus, sellest tingitud vead

ss partitioning lokaalsed kooslused on taksonoomiliselt sarnasemad kui võiks oletada.

unities. Natur puude biomass ei sõltu laiuskraadist; puude arv ha kohta suurem troopikas ja see otseselt mõj BD-laiuskraadi suhet.

ectomycorrhizal mat soils of a Douglas fir ecosystem. Soil Biol. Biochem. 23: 285-290.

Hysterang

v. Conserv. 17: 261-276.

Protistide seas palju kirjeldama

ant Ecol. Evol. toimjate seemnetega taimed - pms parasitidid või mukonet; Kubiaceae jt pole parasitismi tuvastatud; Pöolparasitine eluviis on eeldusek

is 68:371-374. liigifondi hüpotees: testimiseks peab olema täielik liikide nimekirja ja ka liigifond ise; või uurida liikide evol kiirusi eri aladel samades perek-des

ecosystems. C jääkpopulatsioonide tähtsus taimedel

nslocation in ectomycorrhizal and non-mycorrhizal pine seedlings. New Phytol. 119: 235-242.

f three ectomycorrhizal fungi to colonize Pinus sylvestris roots. Mycol. Res. 96: 270-272

ectomycorrhizal basidiomycete Tylospora fibrillosa by RFLP analysis of the PCI Tylospora fibrillosa: IGS, ITS -kultuurist -ei mingit e Tylospora fibrillosa: IGS, ITS -kultu  
r, Tylopilus 3 RE, Taxotron probleemid topeltbändid ...

ngi infecting Pinus sylvestris L. II. Growth rates in pure culture at different pH values compared to growth rates in symbiosis with the host plant. New Phytol. 115: 683-6

Pinus sylvestris L. III. Saprophytic growth and host plant infection at different pH values in unsterile humus. New Phytol. 117: 405-411.

1 RE: Tylospora vs teised

minant tree co Brachystegia: seemned ei kuku kaugemale võrast kui 4 m; seemikute arengu kriitiliseks osaks on läbi mullakoore tungimine. Idandamine

tatistilised erinevused

sia herba-alba Helianthemum squamatum idanemine: 5 a jooksul ei vähene õhukindlas purgis; puju on allelopaatiline: eriti külm ekstrakt vrd kuumaga ja suuremates kontse  
nishment of H. Helianthemum squamatum elumus: sõltub pos kõvast mullakoorigust, samblikukatkest, emataimedest jt rohttaimedest; neg sammaldest. Seemned ei levi kaug  
jooksul

ruumiline mullaökoloogia: ülevaade

able Isotopes in Ecology and Environmental Science. Blackwell Publishing: Oxford, UK. Pp. 83-98.

se) is clarified by sequence data from duplicated GBSSI genes. Am. J. Bot. 89: 1478-1484.

Rosaceae: Photinia lähim sugulane c

rmania spp. New Phytol. 112: 419-422.

uurea kog

range expansion: lessons from the infinite-island model. Mol. Ecol. 13: 853-864.

incipes, S. Tomé, and Annobon). Bull. Brit. Mus. Nat. Hist. Ser. Bot. 4: 327-411.

s en Afrique Tropicale: Etude de Quelques Especies Rouges. Belg. Journ. Bot. 131: 139-149.

s Cantharellus (Basidiomycetes). Aust. Syst. Bot. 14: 587-598.

Cantharellus AUSs -tohtult valemäi

ncommon mut endofüütide kasulikkus. Toksiinide tootikkus ja mulla N rikkus

61: 1-10.

Faithi fül Faithi fülodiversiteet

mente JC, Knight R, Heath AC, Leibel RL, Rosenbaum M, Gordon JL. 2013. The long-term stability of the human gut microbiota. Science 350: 44.

opy number on PCR amplification of 16S rRNA genes from a mixture of bacterial PCR 16SrRNA geenide eristat PCR 16SrRNA geenide eristamine kui on erinevad koopia

obs Pinus strobus seemikute l taimitates. ILLUSTR. Amphinema mütseel väga seotud männi varise ja kõduga ning arvab sellel olevat oluline roll

e viljub itaalias ebatsuga ja männi 2-3 a istandikes. V sage. Lehise all puudub. Mood mükoriisat, kus vaheseinu ei leitud

eri mullakihtides

Brachystegia, Afzelia, Anthonotha, Paramacrolobium, Monopetalanthus, Gilbertiodendron, Julbernardia (Caesalp) mood EcM Kongos

strobuseel

. I. Micorriize e sviluppo dei semenzali nel secondo anno. Allionia 13: 177-186.

Gnetum africanum mood EcM Scleroderma sp-ga

r. Microbiol. l Network-anal: ülevaade-co-occurrence metoodikast

ay detection of small insertions and deletions in BRCA1 and BRCA2. Nature Genet. 18: 561-564.

läbi multiplex PCR SNP detekteerimine p53 t

ic, Percy DM, Hajibabei M, Barrett SCH. 2008. Multiple multilocus DNA barcoding: taime DNA barcoding: trnH-psbA ja rbcL on parimad lookused. Praimerite

ships within the Cantharellaceae inferred from sequence analysis of the nuclear large subunit rDNA. Mycol. Res. 101 : 1423-1430. Cantharellus, Craterellus, LSU. Amc

y and systematics of basidiomycetous yeasts as determined by large-subunit rDNA D1/D2 domain sequence analysis. Int. J. Syst. Evo pärimid esinevad nii nõigeseente, Trer

ers ET, Bücking H. 2012. Carbon availability triggers fungal nitrogen uptake and transport in arbuscular mycorrhizal symbiosis. Proc. Natl. Acad. Sci. USA 109: 2666-267

ate production of laccase and Mn-peroxidase by Panus tigrinus on olive mill wastewater-based media. J. Biotechnol. 100 77-85

MnP: mõt

: Landboh. Aarskr. 1: 332-382.

eks. Esmakordselt mainib seotust mükoriisete struktuuridega

Cenococcum graniforme: käsitl

etic studies of Terfezia pfeilii and Choiromyces echinulatus (Pezizales) support new genera for southern African truffles: Kalaharitube Terfeziaceae: Choiromyces echinula

nts and succes Costa Rica vanas kakaostanduses La Selva bioloogiajaamasloodusliku regener osas domin Neea sp.

cumi viljakehad meenutavad sklerootsüme. Ei sekveneeritud  
'ovirens complex): aspects of its conidiogenesis and ecology. Mycotaxon 54: 287-294.

phytes *Leptodontidium orchidicola* and *Phialocephala fortinii* (Fungi Imperfecti) on the growth of some subalpine plants in culture. Can. J. Bot. 74: 1071-1078.

action by Ceriporiopsis subvermispora during solid-state fermentation of Eucalyptus grandis. Enz. Microb. Technol. 32: 59-65 **MnP: prot**

do *Pinus pinaster*. Sol. Pub. Serv. Florestais Aquic. Portugal 8: 65-95.

ic composition Amazonia Igapod: Aldina domin  
**männiistandikes**

n DM, Kerr JI **liigirikkus sõltub enim kliimast. Suuremal liigirikkus sõltub** enim kliimast. Suurematel uuringualadel seosed tugevamad kui väiksemat  
oil bacteria. Ecology 88: 1354-1364.

vards RA, Felts B, Rayhawk S, Knight R, Rohwer F, Jackson RB. 2007. Metagenomic and Small-Subunit rRNA Analyses Reveal the Genetic Diversity of Bacteria, Archaea  
ecology. Soil **mullaökoogia, biokeemia integreerimine: tulemuste võrr fingerprinting meetodite v fingerprinting meetodite võrreldamatus vrd sekv-p**  
community structure by use of taxon-specific quantitative PCR assays. Appl. Env qPCR eri mikroobirühmadele: seened, arhed, bakterid ja nende eritaksonid  
unities. Proc. Natl. Acad. Sci. 103: 616-631. **bakteritel: latituudi gradienti ei tuvastatud T-RFLP baasil. Lokaalselt mõjutas kooslust ja lii**

t JA, McCulley RL. 2013. Reconstructing the microbial diversity of pre-agricultural tallgrass prairie soils in the United States. Science 342: 621-624.

ekt; kooslused ja metaboolne pot muutuvad tugevasti; fülogeneet, metagenoomi ja kataboolne distants olid omavahel korreleeritud Mantel testi põh  
A, Wall DH, Caporaso JG. 2013. Cross-biome metagenomic and **metagenoom** üle koosluste: kuuma- ja külmakõrbetes BD taksonitel ja metagenoomidel mad  
l communities. Am. J. Bot. 98: IN PRESS.

cterid, v palju liike, vähem seeni (SordarioM) ja taimi (Pinus pms) ning loomi (Diptera, lestad). Päevane temporaalne erinevus väga suur ning raske  
011. Microbes do not follow the elevational diversity patterns o **bakterid kõrgusgradientil: vahet pole. Arv mõj baktereid muud asjaolud**  
l controls on the landscape-scale biogeography of stream bacterial communities. Ecology 88: 2162-2173.

ition through two soil depth profiles. Soil Biol. Biochem. 35: 16 **mikroobide levik PLFA**

erns in belowground communities. Ecol. Lett. 12: 1-12. **mullaelukate, sh mikroobide biomass bioomide kaupa: suurim metsa-ökosüüs, er troop vihm:**

: and time. In: Zengler K (ed.). Accessing Uncultivated Microo mikroobide biogeograafia ja ökoloogia reeglid

lands. Biodiv. **Sao Tome, Principe, Bioko taimkate ja endemism. Sao Tomel 601 liiki, 95 neist endeemid (sh 81 vaid Sao Tomel)**

lands. Biodiv. Conserv. 3: 785-793.

nine + ARDRA + sekv. Kuuse risosfääri bakterid ja seened on erinevad haigete is **bakterid, seened, 18S (seentele NS1, NS2) + kloneerimine + AR sarnasusindeksid, puule**  
from soil substrate using real-time PCR. J. Microbiol. Meth. 67-76. **Real-time PCR monel** juhul mittesteriilne muld inhibeerib vrd steriilse mullaga; väga täpne

ography of Streambed Microbiota. Appl. Environ. Microbiol. 74: 3014-3021.

irkonnast v erinev; küünel hoopis teistsugused seened sh keskk omad; domin Malassezia, vähem Cryptococcus, Candida jt

õigis geogr piirkondades on kõik sobivad liigid esindatud tuule **heterotroofsete protistide BD on v madal globaalselt. Kõigis geogr piirkondades on kõik sobivad liigid esin**  
d assimilation of nitrogen from 15N-labelled ammonium by Pinus sylvestris plants infected with four different ectomycorrhizal fungi. New Phytol. 110: 59-66.

tomycorrhizal plants. I. Translocation of 14C-labelled carbon between plants interconnected by a common mycelium. New Phytol. 103: 143-156.

between *Pinu Suillus spp. Peremechespetsiifika*

Agric. Ecosyst. Environ. 28: 127-131.

is on the functional diversity of interactions involving the extraradical mycelium. J. Exp. Bot. 59: 1115-1126.

is on the functional diversity of interactions involving the extraradical mycelium. J. Exp. Bot. 59: 1115-1126.

stina and Xerocomus spp. show contrasting colonization patterns in a mixed fore **2 RAPD praimerit**

SL. Deep phylogeny and evolution of slime molds (Mycetozoa). Protist 161: 55-70. **Mycetozoa: viljakehadega lima**

nity composition in a northern hardwood forest - testing effects of root species, re **juurte kvantitat määramin juurte kvantitat määramine trnL kloneerimise+sekv**  
**noodulitega ja noodulitega ja mükoriisasümbiooside stabiilsus: Erikoidne ja orhhidee MR ning noodulitega küllalt stabiilne -ühes-kahes noodulitega ja mükoriisasümbioosid**  
231-243.

nd extinction rates from incompletely resolved phylogenies. Syst. Biol. 58: 595-611. **liigitekke ja väljasuremise prot:**

2-quality DNA from environmental soil samples. Appl. Environ. Microbiol. 76: 4571-4573. **DNA mitmekordne eraldamine/ puhastamine anna**

of the vegetati **Seisellide floora: ca 250 põlist õistaimeliiki, mill Seisellide floora: ca 250 põlist õistaimeliiki, millest 84 on endeemsed. Lisaks teada 80 sõnajalga. Eri metsa**  
ma; mitte isoleeritud Lact pubescens, Hebeloma. Lact vajab vanade puude juurte ühendust

rrhizas on birch seedlings grown around mature trees. New Phytol. 98: 143-153.

e paleozoic origin of enzymatic lignin decomposition reconstructed from 31 fungal gemones. Science 336: 1715-1719. **ligniini lagundavad ensüümid p**

e identification. Mol. Ecol. 11: 839-850. **DNA Barcoding defineerija: Molecular OTU nematoodide 18S rDNA põhjal. Barcoding c**

diomycotina). Mycologia 77: 732-742. **Destuntzia** perek gen nov

Dighton J, White JF, Oudemans P, eds. The Fungal Community. Its Organization and Role in the Ecosystem. CRC Press, Boca Rayton, FL, USA, pp. 733-758.

grown in clay-containing medium. J. Chem. Technol. Biotechnol. 78: 23-34.

i Veen FJF, Th **networking: modulaarsus ja nestedness sõltuvad assots intiimsusest, mitte par v mutualimusest; eri networkide sidumine; multitroofilii:**  
sect herbivore **Spetsialism: herbivooride networkide seas** rohkem spetsiliseerumist kui tolmeldajatel arv võidurelvastumise tõttu

ter tener, Hysetrangium, Cenoc, Tuber abidum eri peremeestaimedel

Allionia 24: 91-98.

n 29: 37-44. **Stephensia bombycina** mood k

39-46.

**ra ja Hebeloma longicaudum VK obs EcM tippudeni myc järgi, kirjeldab ka palju teisi tüüpe, illustr.**

**Salix 14 liigil** kõigil EcM; üksikud Salix alba, purpurea ja aurita var caprea isendid olid NM; AM v vähe

nd controlled conditions. New Phytol. 99: 441-447.

dland. Acta Hort. 457: 119-126.

apart molecular-versus fossil-based error estimates when dating **Betulaceae pärineb** mol fül jr 115-130 MAT tagasi; vanimad fossiilid **Betulaceae** pärineb mol fül jr 115-130

t of the onvasi **invasiivsed eukalüptid RSAs: mitmed liigid** levivad vaikselt koldest emale ja transformeerivad maastikku. Kasutatud ornamentaalselt  
l'*Helianthemum guttatum* par trois espèces de terfez des genres *Terfezia* et *Tirmania* d'Algerie. Can. J. Bot. 70: 2453-2460.

d their effect on mycorrhizal development. Plant Soil 71: 275-284.

ological changes during ectomycorrhiza formation. Can. J. Bot. 58: 361-365.

*s sylvestris* L. Can. J. Bot. 44: 1087-1092.

R, Bascompte network analüüs: tugevalt connected networkides on rohkem nii nested kui ka modulaarseid kooslusi; nestednessi tuvastamiseks paren  
r. New Phytol. 88: 705-712.

ributions. Biometrics 66: 186-195.

L. 2002. Mycorrhiza Helper Bacteria stimulate ectomycorrhizal symbiosis of Acacia holosericea with Pisolithus alba. New Phytol. 153: 81-89.

Soil 71: 269-272 **varane vs hiline: Leccinum ja Lacti pubescens ei levi eostega noortele taimedele; Inocybe, Laccaria ja Hebeloma kolonis eostega noori taimi holpsasti; eosed**

**Arg keskosas** Chaco puissavann: EcM vaid Salix humboldtiana

posure to subfreezing temperatures. Can. J. Bot. 57: 1845-1848.

stera monocyctogenes strains involved in invasive and noninvasive listeriosis outbreak **IRS-PCR kasutamine** ja selle eelised AFLP ees. Korratav. IRS-PCR>AP-PCR>RAPD

on of plant communities **taimed: ruderaalid vs teised: AM tähtsus**

with special requirements **taimed: ruderaalid vs teised: AM tähtsus**

**Quercus, Fagus, Corylus, Picea, Pinus, Castanea, Populus alba mood EcM**

**Mükoriisatüüpide esmakirjeldused: AM, ErM, OrM, Monotropoid ja EcM; Pyrola leiti NM**

. Ges. 6: 248-269.

haft vol. 1. W. Engelmann, Leipzig. 669 p.

belowground **ektomükoriisa mõiste, EcM esinevus Fagaceae, Salicaceae ja Pinaceae liikidel (Carpinus, Corylus, Fagus, Quercus, Castanea, Salix, Populus, Pinus, Picea, /**  
nt dispersal of fungal spores promotes seedling establishment away from mycorrhizal networks on *Quercus garryana*. Botany 87: 821-829.

mycorrhizal inoculum in Oregon white oak woodlands. Northwest Sci. 80: 264-273.

pseudoplatanus: relationships with seedling growth and soil factors. New Phytol. 101: 133-151.

of a decomposer fungus, Mycena galopus. Can. J. Bot. 73: S1399-S1406.

102: 1-15.

r, and mixed alder **lepaga segametsades suurem taimede ohtrus ja tihedus, mis arv seostud rohkema valgusega eriti veget-perioodi piirilal (???)**

mixed alder-conifer communities. I. Understory vegetation and stand structure. 37-44.

mixed alder-conifer communities. II. Epiphytic, epixylic, and epilithic cryptogams. In: Trappe JM, Franklin JF, Tarrant RF, Hansen GM (eds.) Biology of Alder. Pacific No  
mycorrhizal pine seedlings under elevated CO2 vary with fungal species? Plant Soil In Press.

respond differently to increased carbon availability. FEMS Microbiol. Ecol. 61: 246-257.

a sp. Domin.

loobuti

the dangers of ignoring an evolutionary model. Am. Nat. 178: E10-E17.

**fülogeneetiline GLS**

nd spatial sign **tunnuste muutuste uurimine tingimustes, kus liikide fülogeneesi ja areaali on samaaegselt arvesse võetud tunnuste r** tunnuste muutuste un

2: 1367-1375. **võrdleva analüüsi komistuskivid: madala R2-mudelite usaldamine suure valimi ja log-skaala korral; sa võrdleva e** võrdleva analüüsi ko

. 2004. An expanded plastid DNA phylogeny of Orchidaceae and analysis of Jackknife branch support strategy. Am. J. Bot. 91: 149-161. **Orhhideed: Apostasioideae, Vanilloid**

ricaceae) based on ITS sequences, morphology and development. Syst. Bot. 24: 398-408.

**Pyroloideae** feneetiliste tunnuste põ

ricaceae) based on ITS sequences, morphology, and development. Syst. Bot. 24: 398-408.

**Pyrolaceae: Chimaphila ja Moneses**

ret and cytosolic Zn sequestration in the fungal mantle of Picea abies -Hebeloma crustuliniforme ectomycorrhizas. Plant, Cell Environ. 23: 1257-1265.

rtinotti MG, Pierrat J-C, Garbaye J. 2005. Ectomycorrhizal symbiosis affects functional diversity of rhizosphere fluorescent pseudomonads. New Phytol. 165: 317-328

lation of an ectomycorrhizal fungus and mycorrhiza helper bacterium in two forest nurseries. Soil Biol. Biochem. 31: 1555-1562.

New Phytol. 176: 22-36.

circumscriptions in the ectomycorrhizal genus Laccaria (Agaricales). Mycologia 76: 633-642.

**Laccaria** koosn mitmest eri bioloogil

the ectomycorrhizal fungus Hebeloma mesophaeum (Agaricales). In: ??? (eds). Mycorrhizae: Physiology and Genetics. ???

Kiefer und Fichte. Sv. Bot. Tidskr. 36: 151-156.

es. Trans. Br. Mycol. Soc. 70: 319-324.

aria laccata (Agaricales). Mycologia 75: 221-227.

**Laccaria laccata** jaguneb vähemasti l

fungus Suillus luteus (Boletaceae). New Phytol. 107: 735-739.

fungus Suillus luteus, Boletaceae. New Phytol. 107: 735-740.

m the fossil record. Curr. Opin. Pl. Biol. 8: 5-12.

**õistaimede fülogenees** ja varajane biogeograafia: Chloranthaceae, Fag **õistaimede** fülogenees ja varajane bi

**Uruguay Leguminosae: enamasti AM, aga Gleditsia amorphoides, Calliandria parvifolia, tweedii; Prosopis spp mood AM ja EcM; Lonchocarpus n**

. Romantschuk M. 2000. Effect of Cd-containing wood ash on the microflora of coniferous forest humus. FEMS Microbiol. Ecol. 32: 43-51.

col. Res. 104: 1202-1212.

ned, väga vähe EcM seeni: Tom, Thel

Termitomyces and related taxa. Mycol. Res. 107: 1277-1286.

**LSU, mitoch**

**Termitomyces**: monofüleetiline seen

oom genus Cortinarius (Basidiomycota, Agaricales): A comparison of RPB1, RPB2, and ITS phylogenies. Mol. Phyl. Evol. 37: 602-616 **Cortinarius** subgen Phlegmacium: RI

o) in Transition: **Zambia miombod: Brachystegia BD tsender. Mio Zambia miombod: Brachystegia BD tsender. Miombo kliima, muld, juured ulatuvad puust väh 27 m eemale**

oil. Soil Biol. Biochem. 43: 1621-1625.

**PLFA: seente PLFAd** 18:2w6,9 ja 18:1w9 on sagedased ka teistel mullamikro

Sary J, Baldri **puuliik mõjutab tugevasti varise kvaliteeti**, mis omakorda mõjutab mulla A ja O horisondi keemiat ja mikroobe nii otseselt kui ka läbi

logy research in China. Soil Biol. Biochem. 1-9.

nden Pilzen. Bibl. Bot. 76: 1-32.

IH. 2008. A latitudinal diversity gradient in planktonic marine bacteria **latituudi gradient** merebakteritel - just nagu teistel org-del

liigirikkust ja mitmekesisust tundras. Erinevusi liigirikkuses ja koosluse struktuuris mõjutab happeline vs aluseline põhjakivim

**ITS-RFLP: SSU**

gical species of Armillaria associated with Wynnea and Entoloma abortivum using **IGS-RFLP: Armillaria** Jaapanis; eri Armillaria sp parasiteerivad eri Wynnea sp ja Entolon

tion and identification of mycobacterium species isolates by DNA microarray. J. Clin. Microbiol. 41: 2605-2615.

**gyrP geen** Mycobacteria; 15 nu oligod; liigini

re, Northeastern Area, State and Private Forestry. Available at [http://www.na.fs.fed.us/pubs/silvics\\_manual/Volume\\_2/alnus/glutinosa.htm](http://www.na.fs.fed.us/pubs/silvics_manual/Volume_2/alnus/glutinosa.htm)

5.3. URL <http://cran.r-project.org/package=fields> [accessed 1 February 2011].

A for expression cloning by indirect extraction methods. FEMS Microbiol. Ecol. 44: 153-163.

**DNA eraldamine** erinevatest keskkonnaproovidest -mehaa

metals and radionuclides by fungi, bioweathering and bioremediation. Mycol. Res. 111: 3-49.

ots of Pinus radiata. N. Z. J. For. Sci. 5: 33-41.

le and incompetent Paxillus involutus isolates for ectomycorrhiza formation in vitro with poplar (*Populus x canescens*) differ in H<sub>2</sub>O<sub>2</sub> production. *Plant Biol.* 6: 91-99.

mpheinema, Cenoc; Ala2: Amphinema (67%), Wilcoxina, Cenoc **99% ITS kriteerium**

contaminized black spruce seedlings as affected by nitrogen fertilization, inoculum type, and symbiont. *Can. J. For. Res.* 18: 922-929.

the cap: a field- and modeling-based study. *Mycologia* 103: 117-127.

epitiseerimata. Eri seeneharud

r sequence alignment and molecular phylogeny. *Comput. Appl. Biosci.* 12: 543-548. **Seaview Seaview**

ive molecular phylogeny of the subfamily Dipterocarpoideae (Dipterocarpaceae) based on chloroplast DNA sequences. *Genes Genet.* **Dipterocarpoideae jaguneb 4 rühmal**

IC, Fröberg M, Stendah J, Philipson CD, Mikusinski G, Andersson E, Westerlund B, Andren H, Moberg F, Moen J, Bengtsson J. 2013. Higher levels of multiple ecosystem successional plant community. *New Phytol.* 115: 85-91.

ljumine, eriti s **seente viljumine, eriti saproobidel ja EcM lehtpuude** seentel on nihkunud nii varasemaks kui ka hilisemaks

*onticola*. *Mycol. Res.* 110: 318-327.

rvation of Littoral Ecosystems in Southeastern Madagascar, Tolagnaro (Fort Dauphin). *SI/MAB Series #11*. Smithsonian Institution, Washington DC, USA.

, Buscot F, Guo L-D. 2013. Host plant genus-level diversity is the best predictor of ectomycorrhizal fungal diversity in a Chinese subtropical forest. *Mol. Ecol.* 22: 3403-3412.

neb keskealistest ja vanadest metsadest; noortes ja keskmistes metsades seletas pms keskk-tingimused, ent vanades metsades r SEM EcM kooslusel

l (16), Inoc (15), Russ-Lact (8), Sebacina ja Cort (7)

Malassezia?)

ectomycorrhizal fungus *Paxillus involutus* with special reference to summer drought. *For. Ecol. Manage.* 98: 221-228.

acteria associated with the *Pseudotsuga menziesii*-*Laccaria laccata* symbiosis. *Symbiosis* 14: 335-344.

o water stress. *Outlook on Agric.* 29: 63-69.

terokaryosis is not required for virulence of *Heterobasidion annosum*. *Mycologia* 89: 92-102.

terokaryosis is not required for virulence of *Heterobasidion annosum*. *Mycologia* 89: 92-102.

terokaryosis is not required for virulence of *Heterobasidion annosum*. *Mycologia* 89: 92-102.

ent and mycorrhizal inoculation as a practice in afforestation of soils with *Pinus halepensis* Miller: effect on their microbial activity. *Soil Biol. Biochem.* 32: 1173-1181.

5: 657-663. **Bonferroni korrektsioon**

EcM morf poolest v sarnased ja kasvavad aluselisel pinnasel koos *Quercus ilex*iga sünt põhjal

ylvain ZA, Milano de Tomasei C, Wall DH. 2014. Are there links between mullamikroobide ja ökosüüsi funktsioonide sültuvus kliimamuutustest on mõnevõrra s

es – application to the identification of mycorrhizas and rusts. *Mol. Ecol.* 2: 113-122. **primer ITS1F ja ITS4B, CTAB-protokoll**

**BD, VK: Suillus pungens, Amanita franchetii, Cortinarius sp** **2 (+2) RE, lisabändid; sekv mtLSU** **tildosakaalu valem**

enous and introduced symbiotic fungi in ectomycorrhizae by amplification of nuclear DNA. *For. Ecol. Manage.* 24: 27-42.

in Western Australia by mycorrhizal fungi. *For. Ecol. Manage.* 24: 27-42.

ises in fungi suggested by SSU rDNA phylogeny. *Science* 268: 1492-1495. **samblikud on tekkinud kand-ja kotts**

te

as; fülogeneetiline konserv mitmetes kooslustes, eriti häiritud tüüpides. Mõned Seb A liigid rohttaimede juurtes puudest 20 m eemal.

us forests in South Chile. *Mycologia* 34: 136-145. **CHI 4 uut Cortinariuse liiki. Se**

ic classification in the genus *Cortinarius* (Basidiomycota, Agaricales) derived from morphological and molecular data. *Can. J. Bot.* 83: 1019-1029. **Cortinarius**

og agarics from nuclear gene sequences and basidiospore ultrastructure. *Mycol. Res.* 111: 1019-1029. **Agaricales: tumedaoselised paksus**

õigi Tshiiilise sissetoodud puuliikide ja Nothofaguse EcM seente nimekirj: Eucalyptus, Betula, Pinaceae, Populus, Quercus, Salix

**Kesk-Tshiiilise 35,4-37,8\*N, EcM puud Nothofagus, Ugni molinae (Myrt); Luma apiculata (Myrt) ja Persea lingue (Kesk-Tshiiilise: (Austro)Pax 5, Ar**

gen on Walker Branch watershed. *Ecology* 74: 2098-2113.

graphy and soil phosphorus on the vegetation of Korup forest re **Korupi metsa taimeistik ja selle seotus mullafosforiga: tsesalp pms madala P kasvukohtades; Uapacal tugev**

iversity on ro **taimede liigirikkus ega taime funktsionaalsete rühmade rikkus ei avalda mõju juurte ega mullafauna diversiteedile. Libliköielised vähendasid juurte hulka j**

**ökol põhiküsimused on: latituudi grad - B ökol põhiküsimused on: latituudi grad - BD-energia suhted; BD-pindala; BD-BD suhted**

**ja Warra reservis; vana vs regener mets: peamine viljumisaeg veebr-sept, er juuli keskel. Domin perek Cortinarius s.l., Russulaceae, Amanita**

tion interactions in the ectomycorrhizal fungus *Hebeloma cylindrosporum* Romagnesi. *New Phytol.* 123: 335-343.

rsity studies and its implications in ecological and biogeographic inferences. *Mol. Ecol.* **endof liikide eristamiseks jääb teatud rühmades ITSist väheks resol tõttu )Co**

the sequestrate *Amogaster viridiglebus* is derived from within the agaricoid genus *Lepiota* (Agaricaceae). *Mycol. Progr.* 12: 151-155.

mixed stand of spruce, larch and beech trees and of understorey vegetation including fungi. *Isotopenpraxis Environ. Health Stud.* 29: 35-44.

coheterotrophic orchids provides insight into nitrogen and carbon gain from fungal association. *New Phytol.* 160: 209-223.

coheterotrophic orchids provides insight into nitrogen and carbon gain from fungal association. *New Phytol.* 160: 209-223.

nctional groups of fungi in relation to substrate utilisation. *New Phytol.* 142: 93-101.

a muricatum, Tuber sp, Pezizales sp, Laccaria ameth,

i-4 morfotüüpi (kuni 8) 4 c,3 mullas: heterogeensus suur, ent seda stat ei mõõdetud; Tomentella sp. eelistas orgaanikat

ortance of a community approach. *Environ. Entomol.* 38: 93-102.

o Australian rain forests: occurrence, colonization, and relationships with plant performance. *Mycorrhiza* 16: 89-98.

i the formation **haabadel AM vs EcM sõltub mullaniiskusest ja niisutamisest. Optimaalse korral EcM, liigimiskes ja liigikuias rohkem Ami. Eri genititel ponud rolli AM ja I**

a vastavus **2 RE**

the mycorrhizal mutualists of plants. *Trends Ecol. Evol.* 9: 251-255.

stress affect the ectomycorrhizae of pinyon pines. *Ecology* 76: 2118-2123.

, Schoch C, Tibell L, Untereiner WA, Aptroot A. 2006. Eurotiomycetes: Eurotiomycetidae and Chaetothyriomycetidae. *Mycologia* 98: 101-110. **(Eurotium + Mycocaliciales) L**

. ALASKA: VK andmed ja mulla DNA andmed ei klapi; mullas palju rohkem liike kui viljakel; **perek-sisesed kimäärid; singletonide eemaldamine**

and cryptic speciation events in the fly agaric (*Amanita muscaria*). **Amanita muscaria B-tub, ITS, LSU** **Amanita m NCA jms**

is: Alaska: 2 veget-tüüpi (eri tulemused); muld vs VK

os ME, Taylor DL. 2012. An arctic community of symbiotic fungi assembled by long-distance dispersers: phylogenetic diversity of ectomycorrhizal basidiomycetes in Sva

ong inter- and intracontinental phylogeographic structure in *Amanita muscaria* koosneb väh 8st iseseisvast evol-harust, mis asuvad eri kontinentidel ja/v

ae, an arbuscular mycorrhizal fungus. Mol. Ecol. 4: 61-68.

RAPD praimer *Glomus mosseale* -RAPD>sisesed spets praimerid; pole hea

acid phosph

mic layers by *Calluna*: the role of ericoid mycorrhizas. J. Exp. Bot. 51: 1117-1125.

/clic aromatic hydrocarbon (PAH) fluorene is retarded in a Scots pine ectomycorrhizosphere. New Phytol. 163: 641-649.

Thelephor

iom bicolor; EmH *Meliniomyces*, *Sistotrema*, *Cortinarius*, *Cenoc*

increases with *Calluna vs Nardus + mükoriisa*

ween Central and South America, Pleistocene climatic fluctuations, or an accident of the Andean orogeny? Annals of the Missouri Botanical Garden 68: 557-593.

ocal communities predicts the size of the regional species pool. *Jalvaritel mida* rikkam on liigifond, seda suurem on ka keskmine liikidevaheline fülogeneet

ction Cembroides: Implications for Molecular Systematic Studies of Pine Species Complexes. Mol. Phyl. Evol. 21: 449-467.

*Pinus subsect Cembroides*: ITS1 on

LM. 2001. Phylogenetics of Helotiales and Rhytismates based on partial small subunit nuclear ribosomal DNA sequences. Mycolog *Helotiales*: SSU -Helotiales sisaldab

dying the regulation of manganese peroxidase expression. Curr. Genet. 31: 519-524.

MnP geen

m, *Aureobasidium*, v palju reostuseid

*amethystina* pisikesed geneti

2 RAPD praimerit

ace and deep marinebacterial communities. Proc. Natl. Acad. Sci. USA 109: 17633-17638.

tionships of the Gomphales based on nuc-25S-rDNA, mit-12S-rDNA, and mit-atp6-DNA combined sequences. Fung. Biol. 114: 224-2 *Gomphales* 3 geeni baasil: väga

ja männi istandikes Brasiilias. Palju peremehe spets liike. *Domin. Laccaria spp. Ja Scleroderma spp.* Eukalüptil ühtl aastaringselt, er sügisel; männil pms talvel ja sügisel, v

. 31: 755-773.

Trichoder

sus. Ann. Bot. 31: 803-815.

ffects of glucose, nitrogen and phosphorus in relation to successions. Mycol. Res. 94: 166-172.

7-24.

mRNA mikroarray geeniekspressiooni uurimi

. Natl. Acad. Sci. USA 104: 4979-4983.

215-220.

Hydnocystis, Hydnoplicata, Ste

rv. 12: 1687-1697.

*Uus-Kaledoonia* kuivad troopised metsad on maailma ohustatumaid ökosüsteeme, sisald palju endeemseid

po of molecular evolution in mammals. Proc. R. Soc. B 276: 33: *diversifitseerumine* kiirem troopikas kui parasvöötmes; ning madalal vs kõrgel: imetajatel. V

kus, rakkude arv, epidermoidrakkude pindala

harun EmH

raceae. New Phytol. 92: 533-537.

ompatible and incompatibl fungi. Can. J. Bot. 68: 1239-1244.

i. Fung. Genet. Biol. 45: 791-802.

i of two Mediterranean plants. New Phytol. 155: 481-498.

of *Pinus halepensis* Mill. Allionia 33: 93-98.

ebauer G, Perotto S. 2011. Photosynthetic Mediterranean meadow orchids feature partial mycoheterotrophy and specific mycorrhizal associations. Am. J. Bot. 98: 1148-11

Segreto R, Loreto F, Cozzolino S, Perotto S. 2006. Inefficient photosynthesis in the Mediterranean orchid *Limodorum abortivum* is mirrored by specific association to ecto

klasteranalüüs. Polnud olulisi erinevusi aastajati ega eri pestitsiidide kasutamise *bakterid, seened, AM-seened*; 18S RT-PCR+DGGE + klasteranalüüs. Polnud olulisi erine

akup, immigration from the boreotropics, and transoceanic dispe *kauglevi on olnud* taimedel palju olulisem kui arvatud varem. Toetavad siiski Dipteroocarpaceae Gondwana

kontrollaladel proovi kohta

elial interconnectedness. Trends Microbiol. 12: 135-141.

*svus üle N-Am kontinendi; väiksem BD põhjapool. Resist. Propagule ja mullapõhine-liigirikkus negatiivses seoses (vigane analüüs) - ilmelt polnud*

*Epulorhiza sp. (sensu Sebacina)* isolated from Australian orchids. Aust. Mycologist 20: 12-15.

*Ceratobasidiales*: parentesoom perfo

<sup>13</sup>C content of primary and secondary plant products in different cell compartments and that of decomposing basidiomycetes. Plant Physiol. 102: 1287-1290.

jarrah metsas: peamine faktor metsa vanus 3-20 a vs vana. *Domin Austropax, Laccaria, Ramaria*

ic variation of ectomycorrhizal fungi associated with *Eucalyptus* ecosystems as re 4+2 RE, ITS, mt ITS

*Cortinariust* ei saa RFLP põhjal eristada. ITS vähe diverge

iscrimination of primers for PCR-RFLP of larger basidiomycetes and their applic *eri RE, praimerite genereerimi praimerisaitide* mutats eri DNA piirkondade muutumine eri

*Sebacina*: LSU, mükoriissed liigid er

*Pinus pinaster*, *Rhizopogon luteolus* and their ectomycorrhizal association. New Phytol. 154: 509-516.

NO3-tran

o) of large community datasets. Nucl. Ac. Res. 38: e155.

MultiCoLa automaat

nant process for carbon input into soil organic matter. Plant Soil 281: 15-24.

mullaorga

*Hebeloma, Cort, Tricholoma, Scleroderma, Pisol, Pax, Laccaria, Amanita, Leccinum, Lact, Thel, Cenoc, , Haaval. Lact pubescens, kase-spets Leccinum spp* mood EcM k

olor with container-grown white pine seedlings. Mycol. Res. 94: 1051-1058.

ts of competi Taimede kooseksisteerimine ei sõltu fülogeneetilisel kaugusest. Summaarne fitness oli fülogeneesist sõltuv tunnus

CHILE: väid *Nothofagus spp* mood EcM, Ugni candollei jt mood AM

r taxonomy of phytopathogenic fungi: a case study in *Peronospora*. PLoS One 4: e6319.

Geenipanga DNA, Geenipanga DNA jrk annoteeeri

lata, and their use in phylogenetic inference from sequences with intra-individual variability. BMC Evol. Biol. 8.86.

Fülogenee Fülogeneesi võrgustil

oaches to the study of fungal pathogenicity. Annu. Rev. Phytopathol. 39: 337-365.

erv. 6: 359-377.

*Kapimaa floora* on vahemereline, väga liigirikas, mida põhj suht stabiilne pikaajaline keskkond, toitainetev:

onserved across ökoloogilised seosed ja network liikide vahel on evolutsiooniliselt konserveerunud. Viirustel>bakterid>eukarioidid; sümbiontidel, ek

Garcia LV, Es *patogeenide ruumiline levik mullas neighborhood* mudeli baasil vüttes arvesse puude ja pöösaste lähedust ja basaalpinda; isetehud tark

na *Baixaada Fluminense*. Rodriguesia 4: 179-198.

AS systematics of *Ceratobasidium* and *Thanatephorus* with *Rhizoctonia* anamor ITS

v oluline on vältida se 2-tuumalised *Ceratobasidium* ja mul

osomal DNA and beta-tubulin sequences from fungi in the *Rhizoctonia solani* species complex. Mol. Phyl. Evol. Indelide kodeerimine *Ceratobasidiales*: parasiitsed *Thanat*

al small subunit rRNA V4, V6, and V9 domains reveal highly species-specific v mt SSU praimerid V4U, V4R, V6U, V6R, V9U, V9R *Psathyrellale*

al Small-Subunit rRNA V4, V6, and V9 domains reveal highly species-specific v V4U, V6U primerid originaalis

tion of *Pinus halepensis* Mill. and *Pinus pinaster* Aiton seedlings in two commercial nurseries. Ann. For. Sci. 60: 43-48.

of Concise Descr. Ectomyc.: Including Microscopic and Molecular Characterization. Mycologue publications, Victoria.

nika: Cenoc, Pilod1, Pilod fallax, Rhizopogon, Lactarius; mineraalis unidentified loobuti  
 ity of Chicago Press, Chicago. 1709 p.  
 e nutrient uptake from different soil depths in Quercus robur, Fagus sylvatica and Picea abies. Plant Soil 286: 87-97.  
 is Geopora liigid (5)  
 al Scots pine (Pinus sylvestris) to elevated CO<sub>2</sub>. New Phytol. 146: 163-168. anova  
 af photosynth **Pyrola rotundifolia**: fotosünt aparatuur madala võimsusega; aktiivsus suureneb augustis.  
 mycorrhizas and root-associated fungi of Vaccinium membranaceum across an elevation gradient in the Canadian Rocky Mountains. Fung. Ecol. In press.  
 f ecological data. J. Stat. Softw. 22: 1-18.  
 rs. 2009. Patterns and causes of species richness: a general sim **globaalne BD**: lahkab võimalikke põhjuseid: energia, levimine ja ajalugu  
 us/pindala = liikide tihedus. Kasutamisevõimalused ja paljud vead. Soovit indiviidide baasil proove koguda. Üld-liigirikkuse ekstrapoleerimine, VII **rarefaction**: indiviidi ja s  
 on 7. Acquired Intelligence Inc. & Kesey-Bear. Jericho, VT 05465. http://garyentsminger.com/ecosim.htm. **EcoSim**: permutatsioon  
 co-occurrence analüüs  
 1: 2606-2621.  
 st record of *Peridiospora tatachia*. Mycotaxon 96: 327-332. **Peridiospora tatachia** sp nov, se  
 ; P. 2008. For. **puujuurte ulatus 4-5 m. Sama liigi puude juurestik** kattub. Seente viljakohade põhjal sama tulemus  
 ed by traditional isolation and cultivation-independent DNA-based methods. FEMS Microbiol. Ecol. 58: 404-41 **ARDRA-DGGE** sama liik ja geneet v sarn tüvi esineb palj  
 ylidrocarbon destructans, Colletotrichum coccodes, Plectosporium tabacinum  
 al user interface for sequence alignment and phylogenetic tree building. Mol. Biol. Evol. 27: 221-224.  
 roduction and **boreaalsetes metsades prim prod suurem heitlehis**tes vs okasmetsades, samas juurte prod veidi suurem okasmetsades. Maasisese prod osakaal samas 0.36 vs  
 rral equation models for ecological systems. Ecol. Monogr. 80: 67-87. **structural equation r**  
**bacea**  
 (ed.). Nitrogen-Fixing Leguminous Symbioses. Springer, Berlin, 23-58.  
 haetales N-Carolinans: Coltriciella dependens levinud kōdūtūvedes ja nende all, alati koos EcM juurtega; Coltricia perennis, cinnamomea, foccicola -kōik seotud tugevasti l  
**Photinia glabra** moodusrab ECM Cenococcumiga ja tuberkuloiset tüüpi  
 evolution and the illusion of precision. Trends Genet. 20: 80-85. **teevad maha** Hedgesi **teevad maha** Hedgesi tööd, sest seal  
 incultured bacteria. Environ. Microbiol. 3: 481-492.  
 dies of actinorhizal symbioses of *Alnus* spp. In Slovenia. Phytol. 39: 207-211.  
 Evol. 21: 501-507. **mikroobide levik**: alla 1 mm mikroobid arv v laualt levinud, suuremad vahem. Ent pole uuritud molekulaars  
 omy to traits. Science 320: 1039-1043.  
 aga Austraalia, **koosluste erinevus suureneb kaugusega; ent ko**kottseente **BD T** **SSU1758, 58S8** kottseentele: ITS1 kompleksanalüüs **sōrensens indeks**, mante  
 dar M, Short JM, Mathur EJ, Detter JC, Bork P, Hugenholtz P, Rubin EM. 2005. **metagenoomide** DNA analüüs Sangeri baasil. Leidsid, et geenirühmad mulla:  
 arbon and nitrogen transfer between an ericaceous dwarf shrub and fungi isolated from *Piceirhiza bicolorata* ectomycorrhizas. New Phytol. 182: 359-366.  
 into the mycorrhizal Rhizoscyphus ericae aggregate: spatial structure and co-colonization of ectomycorrhizal and ericoid roots. New Phytol. 188: 210-222.  
 differences between ericoid mycorrhizal fungi affect nitrogen uptake by *Vaccinium*. New Phytol. 181: 708-718.  
 rhizae between Eucalyptus pilularis and several strains of Pisolithus tinctorius. Aust. J. Bot. 34: 95-102.  
**Agaricales perek** AUS vs muu maailm: Amanita, Hygrophorus, Hygrocybe, Mycena seas v palju endeemsi  
 83.  
 cybe spp.) fungi. Bot. J. Scotl. 54: 7-22.  
 ologia 59: 149-154.  
 traction of DNA and RNA from natural environments for analysis of ribosomal DNA and rRNA-based microbial **DNA ja RNA** eraldamine mullast: kitipõhine ja 10% CTAI  
*Gautieria monticola* and *Hysterangium setchellii* and their association with Douglas-fir seedlings, a case study. Plant Soil 134: 255-259.  
 / A, Zhao X, Korzeniewski F, Smirnova T, Nordberg H, Dubchak I, Shabalov I. 2014. MycoCosm portal: gearing up for 1000 fungal genomes. Nucl. Ac. Res. 42:D695  
 portal of the Department of Energy Joint Genome Institute. Nucleic Acids Res 40: D26-D32. seente genoomika andmebaas J  
 :NA elements associated with the MVX disease of Agaricus bisporus. Mycol. Res. 107: 147-154.  
 na, Suillus1; põlet + tuha eemaldus: Wilc1, Wilc2, Russ2, Rhizopogon; kokku liig **3 RE, sekv ITS, LSU, mtITS** **xxx**  
 nem Fichtenbestand mit Untersuchungen zur Merkmalsvariabilität in sauer beregneten Flächen. Bibl. Mycol. 125: 1-217.  
 f Rhizoctonia spp. And Suillus bovinus based on Southern blot and liquid hybridization-fragment length polymor **Southern blot Southern** blot, dot blot Suillus bovinus, Rhizo  
 patterns of conifer seedlings on a high elevation mine site. Can. J. For. Res. 13: 1145-1158.  
 orthern Channel Islands create fine-scale genetic structure in two **Rhizopogoni 2 liigi** populatsioonide geneetilise distant suureneb kaugusega  
 hology of *Pinus densiflora* without mycorrhizal formation. Mycologia 84: 528-533.  
 ōrtinii s.l. And Acephele applanata in two undisturbed forests in Switzerland and evidence for new cryptic species. Fung. Genet. Biol. **Phialocephala** fortinii uued krūptilise  
 FLP markers for population genetic studies of Phialocephala fortinii and closely **RFLP-põhised probed** DSE (Phialocephala, **RFLP-põhised probed** DSE (Phialocephala, t  
 e for subdivision of the root-endophyte Phialocephala fortinii into cryptic species and recombination within species. Fung. Genet. Biol. **ITS vs RFLP** vs ISSR Phialocephala  
 Gen. et Sp. nov.: a dark, septate, conifer-needle endophyte and its relationships to *Phialocephala* and *Acephele*. Mycol. Res. 113: 207-221.  
 DSE) of the *Phialocephala fortinii* s.l. - *Acephele applanata* s. **Phialocephala** fortinii-Acephele applanata kompleks: lisaks **Phialocephala** fortinii-Acephele  
 yphytic fungi (DSE) using inter-simple-sequence-repeat-anchored polymerase chain **ISSR DSE** kultuuridest üle maailma eristamiseks -tugev meetod, **MCA** klasteranalüüsi as  
 g strains of Phialocephala fortinii and phylogenetic analysis of the genus Phialocephala: **Phialocephala**: spets ITS praimerid **Phialocephala**: polifüleetiline perek  
 rd septate endophytes in a confined forest plot. Mycol. Res. 106: 832-840. **ISSR DSE** kultuuridest kuusejuurtest eristamiseks **klasteranalüüs**  
 ad root symbiont Acephele applanata gen. Et sp. Nov., formerly known as dark-se **Genoomi RFLP, ISSR**; sekven **sekvenerimine** otse r **Acephele** applanata  
 ociation with non-host roots. Mycorrhiza 24: 603-610.  
 010. Molecular detection of Entoloma spp. associated with roots of rosaceous woody plants. Mycol. Progr. 9: 27-36.  
 amics of the ectomycorrhizal fungal species Tricholoma populinum and Tricholoma scalpturatum associated with black poplar under differing environmental conditions. En  
**a: väikesed** mobiilsed genetiid, suur inbrüiding **3 RAPD praimerit**  
 F. 2008. A rock-inhabiting ancestor for mutualistic and pathogen-rich fungal lineages. Stud. Mycol. 61: 111-119. **Verrucariales, Chaetothyriales.**  
 orrhizal symbiosis between Lactarius deliciosus and Pinus sylvestris in forest soil samples: symbiotic efficiency and development on roots of a rDNA internal transcribed s  
**e yle jaapani**: IGS1 põhjal, 1 dominantne alleel, 4-5 haruldast **matsutake: IGS1 3RE**  
 s on mycorrhizal relationships between Pinus sylvestris and Lactarius deliciosus and unprecedented fruitbody formation of the Saffron milk cap under controlled soilless co  
 orrhizal fungus Tricholoma matsutake stimulates Pinus densiflora seedling growth in vitro. Mycorrhiza 14: 397-400.

00. Rapid in vitro ectomycorrhizal infection on *Pinus densiflora* roots by *Tricholoma matsutake*. *Mycoscience* 41: 389-393.

03. Growth stimulation of a shiro-like, mycorrhiza forming, mycelium of *Tricholoma matsutake* on solid substrates by non-ionic surfactants or vegetable oil. *Mycol. Progr*

1. The Evolutionary Split of Pinaceae from Other Conifers: Evidence from an Intron Loss and a Multigene Phylogeny. *Mol. Phyl. Evol.* **Paljasseem**metaind: Sycadales(Gin, nd persistence of an ectomycorrhizal fungus. *New Phytol.* 161: 539-547. kompetitiivne PCR

a *Cylindrospor Hebeloma sp. Ruderaalsus* IGS; 1 RE

vs EMH (ulatub 30 cm eemale) mulla kvantitatiivnePCR spetspraimeritega vs kontrolljärjestus

*loculata*: eripuudel erisendid, samal puul enamasti sama isend. 3 geeni sekveneerimine ja alleelid. Paariline enamasti koniid ja väga lähedalt IGS RFLP meetod geneti määramiseks ECMs

use of some different organic nitrogen sources by the ectomycorrhizal fungus *Hebeloma cylindrosporum*. *Mycorrhiza* 15: 167-177.

344. Mantel test ja partial

listic networks. *Ecol. Lett.* 14: 877-885. Koevol tekitab mitte-koevol set

s in specialization in ant-plant mutualistic networks. *Proc. R. Soc. B* 273: 2041-2047. network analüüs: nes

nis inokuleeritud *Suillus granulatus* või *Lactarius deliciosus* 0-7a; Sg: *S. bovinus*, *R. luteolus*, *C. rutilus*, *Inocybe sp.*, *L-laccata* 2-3a; Ld: *Suillus bovinus*, *Trich pessunda* r fast maximum likelihood-based phylogenetic inference. *Nucl. Ac. Res.* 33: 557-559. PhyML - PhyML - veebiproge

of fungi and bacteria from submerged decomposing leaf litter. *Microb. Ecol.* 45: 11-19.

sity of Peradeniya, Peradeniya.

J. Biogeogr. 1. Sri Lanka vihmametsakoosluste kirjeldused: väga vähe säilinud, domin, eri *Dipero* rühmad

laceae. *Pl. Syst. Evol.* 192: 11-29. rbc Juglans ja lähedased sugukonnad

on J. 2013. Pr juurte lagundamine ja N omastamine mikroobide ja noorte taimede poolt on kiirem kui lehtede lagundamine pöõgi kõdu puhul

exogenous co Juurte eluiga männil sõltub pms juurte järgust ja EcM vs Non-EcM olekust peenimatel juurtel, vähem ka tekkest kas talvel-kevadell vs

na chinensis based on morphology and rDNA sequences. *New Phytol.* 147: 617-630.

stem Brazil. *Mycotaxon* 105: 399-405. Scleroderma sp. Nov Atl vihma

r P, Mirzabekov A. 1997. Manual manufacturing of oligonucleotide, DNA, and protein microchips. *Anal. Biochem.* 250: 203-208. väike, 100-auguga 4% akrüülamiidigeelil põhini

l. 1997. Oligonucleotide microchips as sensors for determinative and environmental studies in microbiology rRNA, rDN, rRNA, rDNA; parim tulemus in vitro transkr i

ntrol of pitch in paper pulp manufacturing. *Trends in Biotech.* 19: 340-348. vaikude, t

. Hüüfid kurrulised, paljude lipiidkehadega. Parasitismi nähte pole

*Cistus L.* (Cistaceae) based on ITS, trnL-trnF, and matK sequen *Cistus -Lääne-Vahemerema* tsistuse perek radiats-tsepter, ent arv mitte perek ega suguk tekketsenter. Le

*roderma bermudense*: the status of *Scleroderma echinulatum* and the first record of *Veligaster nitidum*. *Mycologia* 96: 1370-1379. Scleroderma Ladina-ja Lõuna-Ameee

xidase by pellet culture of the lignin-degrading basidiomycete, *Pleurotus ostreatus*. *Appl. Microbiol. Biotechnol.* 55: 704-711. MnP: mõt

77-883. Pyroloideae feneetiiliste tunnuste põf

and its parent: *Pyrola minor* x *P. Asarifolia*: levik, nish, morfolo *Pyrola minor* x *P. Asarifolia*: levik, nish, morfoloogia

lissection and microarray analysis of *Tuber melanosporum* ectomycorrhizas reveal functional heterogeneity between mantle and Hartig net compartments. *Environ. Microbi*

ub 99: 17-20.

1 *Pinus virginiana*. *Mycologia* 47: 145-147.

logia 45: 971-975.

.i. 11: 401-404.

: 22: 577-583.

100: 217-223

imation of microbial diversity in theory and in practice. *ISME J.* in press. liigirikkuise ekstrapol on proble

ist. *Biol. Sci.* 22: 577-583.

onal climate models MPI Report No. 336, Max Planck Institute kliimakaardid

sh amendment on the growth of the ectomycorrhizal external mycelium. *FEMS Microbiol. Ecol.* 39: 139-146.

diversiteedikomponendi

a, Cort amoenolens; metsasrv: *Lactarius* 4, *Hebeloma*, *Wilcoxina*, *Cortinarius*, Ce 3 RE, ITS1/NL6mum

inema, Tom sp leesikal, *Rhizopogon* ja *Cenococcum*, *Rhiz2*, *Wilcoxina* ebausug 3 RE polyvinylpyrrolidone CTABis

a Vaikse ookeani vihmametsa Ramariad Colombia Vaikse ookeani vihmametsa Ramariad Colombia Vaikse ookeani vihmamete

n *Ramaricum albochraceum*, einer seltenen Art der Gomphales und seine verwandtschaftliche Beziehung zu *Geastrum* und *Gautieria*. *Geastrum*, *Gautieria*, *Ramaricit*

n AM (eds). *Nitrogen-fixing Actinorrhizal Symbioses*. Springer: Berlin, Germany. Pp 25-47. Frankia: 16S vs 23S ja muud g

ie influence of earthworms -a laboratory study. *Soil Biol. Biochem.* 24: 1525-1528.

odes distinguish species of tropical Lepidoptera. *Proc. Natl. Acad. Sci. USA* 103: 968-971. Barcoding Lepidoptera: Barcod

of species concepts of the small, white, European group of *Tuber* spp. Based on morphology and rDNA ITS sequences with special re *Tuber*: ITS põhine: esineb Euroopas

ns. *Trends Biotech.* 21: 433-438.

getatio 27: 49-69.

Optimal *Alnus glutinosa* Symbioses. *Bot. Gaz.* 140: S210-S126.

ae reduce damage to Russian larch by *Othiorhynchus* larvae. *Scand. J. For. Res.* 15: 354-358.

id *Torrendia*: sequestrate *Amanita* - or a mixed bag? Abstracts of the MSA Annual Meeting, 2004. University of North Carolina Asheville, NC. p. 56.

sidiomycetes. eostevihm monokartioididele: eosed levivad väga eostevihm monokartioididele: eosed levivad väga kaugele, ent elamistingimused ei loba eksootilistel liikide

orth America. *Mycologia* 99: 310-316. Bothia gen. Nov (Boletaceae) N

. Arora D, Hibbett DS, Binder M. 2012. Affinities of the *Boletus chromapes* group to *Royoungia* and the description of two new genera, *Harrya* and *Australopilus*. *Aust. Sy*

DS, Binder M. 2012. *Sutorius*: a new genus for *Boletus eximius*. *Mycologia* 104: 951-961.

ogeographic relationships. *Mycol. Res.* 112: 437-447. Tylopilus ballouii morfoliik on pantroopilise lev Tylopilus ballouii: ITS koosneb paljudest paraloogidest, m

phylogenetic analyses of microbial communities including analysis of pyrosequencing and PhyloChip data. *ISME J.* 4: 17-27. Fast Unifrac - palju v

ated fungi with phylogenetic affinities to *Rhizoscyphus ericae* (= *Hymenoscyphus ericae*), *Leotiomycetes*. *Stud. Mycol.* 53: 1-27. Meliniomyces on uus parafüleetiline

3: 305-326.

dendraceae. *Ann. Mo. Bot. Gard.* 78: 89-95. Ticodendron incognitum: levik Mehhikest Panamani, takso Ticodendron incognitum: levik

leotide sequences of chloroplast trnT-trnF region and nuclear rD pappel ja haab on sösarühmad, mille lähim perek on paju. pappel ja haab on sösarühmad, mill

logical survey Iraani lepakoosluse tüpifitseerimine. Paljudest väga vähe järele jäänud



ssner MO, Jabiol J, Makkonen M, McKie BC, Malmqvist B, Peeters ETHM, Scheu S, Schmid B, van Ruijven J, Vos VCA, Hättenschwiler S. 2014. Consequences of bio-  
midt S, Stewart GR. 1999. The 15N natural abundance (d15N) of ecosystem samples reflects measures of water availability. *Aust. J. Plant Physiol.* 26: 185-199.  
art RG. 1996. The 15N natural abundance patterns of field-collected fungi from three kinds of ecosystems. *Rapid Commun. Mass Spectrosc.* 10: 974-978.  
cts of the ecto- and VA-mycorrhizal fungi *Hydnangium carneum* and *Glomus clarum* on the delta15N and delta 13C values of *Eucalyptus globulus* and *Ricinus communi*.  
vegetation: dependence on water availability and disturbance. *Funct. Ecol.* 8: 306-315.

:Carroll SA. 2015. Large multiallelic copy number variations in humans. *Nature Genet.* In press.

ion in the ectomycorrhizal fungus *Suillus bovinus* using hygromycin B as a selective **Suilluse agrobacterium**-transformatsioon  
microarthropods **Oribatida: kõdusegus 3 a jooksul rohkem** liike ja rohkem isendeid kui monospec varises. Arv varise kvaliteedi ja arhitektuuri erinevus  
atmospheric CO2. *Phil. Trans. R. Soc. A* 371:20120294. **kliima** on sajandi jooksul soojenenud 1.7\*, polaaraladel 5\*. Tulevikus, kui CO2 2ko  
emphasis on *Peziza*. *Mycologia* 93: 958-990. **Pezizaceae**: maapealsed maaiseste  
*Peziza* inferred from ITS sequences and morphology. *Mycol. Res.* 106: 879-902. **Peziza s.s.** ITS region. Mõni liik va  
fungus genus *Peziza* and Pezizaceae inferred from multiple nuclear genes: RPB2,  $\beta$ 3 geeni **Pezizaceae**: maapealsed maaiseste  
diverse cup-fungus family Pyronemataceae (Pezizomycetes, Ascomycota) clarifies relationships and evolution of selected life history tra **Pyronemataceae 3 geeni põhjal**  
omycetes. *Mycologia* 98: 1031-1041. **Pezizales LSU ja SSU põhjal.**

ales, Agaricales, Russulales. 474 pp. Nordsvamp, Copenhagen.  
phylloroid and Gastromycetoid Basidiomycetes. 444 pp. Nordsvamp, Copenhagen.  
al taxa target different carbon sources in forest soil. *Ecosystems* 11: 1157-1167.  
graphic patterns: processes shaping the microbial landscape. Na **bakterid**: lokaalses skaalas keskkond seletab 25% ja geogr distant 10% bakterite koosluses  
of unsupervised Bayesian clustering. *Bioinformatics* 27: 611-618. **CROP, Bayesil põhil**  
700-706. **biogeograafia: tuumamarkerid** annavad rohkem ja laialdasemaid võimalusi kui mt-markeri  
e in sporophores of wood rotting fungi. *Mycologia* LXVI, No 3: 469-476 **lakaas: sti**

il and other fungi. *Norrlinia* 10: 1-200.  
ytol. 105 (Suppl.): 1-102  
ge for macroevolutionary simulation and estimating parameters related to diversification from comparative phylogenetic data. [www document] URL <http://cRAN.R-projec>  
ous root endophytes. *Mycol. Res.* 101: 1397-1404. **DSE: ITS + 14RE**; avastasiid et Phialophora finlandia **avastasiid** et Phialophora finlandia ja  
iin the Pezizales. I. 18S rRNA sequence data and classification. *Mycologia* 91: 41-50. **Pezizales: 18S rDNA: Orbiliaceae -c**  
etic inference of Sapindaceae sensu lato using plastid matK and rbcL DNA sequences. *Syst. Bot.* 30: 366-382. **Sapindaceae: Allophylus lähedane B**  
**Carex flacca** ja *C. Pilulifera* EcM-moodi struktuur (vähene HN, rakusisene kolonisatsioon, paks mantel) Cort cinnamomeusega. Väidet Cort cinn ei mu  
*Cenococcum*, *Dryadiriha fulgens*, *Domin* perek *Cortinari*. Kooslus sõltus eelkõige org aine sisaldusest. Org aine rohkus soosis *Craterellus* ja *Cenococcum*  
scens, *Dryadiriha fulgens*, *Cenoc*, *Boletus*. *Domin* perek. *Cortinari*. Ajaline varieeruvus polnud kunagi statistiluline  
**sekveneerimise vead**, nende geenipanka panek, geenipanga vead, nende kontroll, interpret  
of local commu **lokaalne liigirikkus sõltub lineaarselt ja vä** **lokaalne liigirikkus sõltub lineaarselt ja väga tugevasti regionaalset liigirikkusest.**  
for the study of microbial community similarity from termite mounds and tropical **mikrobikoosluste RAPD**, primerite valik, analüüs  
tal and isotopic patterns in macrofungal sporocarps and trees in semiarid forests of the south-western USA. *Funct. Ecol.* 20: 42-51.  
l forests of the Ituri Forest, Africa. *J. Trop. Ecol.* 11: 443-459.  
ive tolerance to potentially toxic metals in the environment? *Plant and Soil* 189: 303-319.  
: *sylvestris*) seedlings by the ectomycorrhizal fungus *Paxillus involutus* in the presence of inhibitory levels of Cd and Zn. *New Phytol.* 142: 141-149.  
: an open-source, high-throughput software tool to identify and extract hypervariable regions of small subunit (1 **eraldab SSU** eri regioonid H) **eraldab SSU** eri regi  
a, mullahorisondi ja kliimavõõtte efektid selet 15-20% igatüki. Mõningate eranditega EcM-seened olid kõik puutumata alade indikaatorid  
community structures throughout soil horizons of harvested and naturally disturbed forest stands. *Environ. Microbiol.* 11: 3045-3062.

nycorrhizae in forest soils of westwern Montana. *For. Sci.* 27: 442-445.  
ated with decayed wood of living northern Idaho conifers. *Mycologia* 81: 765-771. **nitrogenat**

ja ebatsugaat mõj eri istutusviisid erinevalt; eriviiside ja eripuulike eri dominant seened  
iht  
d dehydropolymer of coniferyl alcohol by ericoid and ectomycorrhizal fungi. *Arch. Microbiol.* 153: 352-354.  
2012. Mycoheterotrophic germination of *Pyrola asarifolia* dust seeds reveals convergences with germination in orchids. *New Phytol.* 195: 620-630.  
a 4 MR-tüüpi, millest väh 2 kandseened ja 1 *Cenoc* *Chosenia* (Salicaceae) mood EcM ja vähe AM JPN-s  
i polnud, ecM kolonisatsioon madalaim

d endophytic Mycelium *radicis atrovirens* that were dominant in soil from disturbed sites on growth of *Betula platyphylla* var. *japonica* seedlings. *Ecol. Res.* 16: 117-125.  
avad *Rhizopogon* ja *Tricholoma*  
**AM Juniperus** inhibeerib EcM teket *Pinus edulis*el oma pätsides  
tatus of boletes on the Northern Yucatan Peninsula, Mexico determined using isotopic methods. *Mycorrhiza* 26: 465-471.  
biopolymers. Pp. 129-180. Wiley-VCH, Weinheim, Germany. **MnP, LiP**  
inus. *J. Arn. Arb.* 14: 85-99.  
strobis L. *J. Arn. Arb.* 14: 324-334.  
obs Pinaceae (6 perek), *Quercus*, *Fagus*, *Betula*, *Carya*, *Corylus*. EcM sünt *Pinus* spp.  
i in tropical rain **kõdulagundamine: 'Starvation/inhibition of decomposers' hypotees** - puud minimis varises toitained, et saprobid nälgiks ja mükoriis;  
in terrestrial e **lagunemine vs BD: enamus juhtudel lagundajate seente ja loomade ning taimede BD kiirendab protsessi.** Seentel pms fasilitatsioon, m  
to utilize fatty acids and a lipid as a carbon source for mycelial growth. *Can. J. Bot.* 81: 1285-1292.  
**Graffenrieda emarginata** mood AM ja DSE *Hymenoscyphus ericae* rühmaga, mida peavad ekslikult EcMks. **Sealsamas olemas ka Tulasnella**, mida

ECM transfer-rakkudega  
**Taiwan: EcM** puud *Fagaceae* (sh *Castanopsis*, *Pasania*, *Cyclobalanops*), *Elaeocarpaceae*, *Juglandaceae* (*Engelhardtia*), *Pinaceae*. *Pisonia umbellifera* mood VAM  
; *Hymenoscyphus*; *Neea*: *Tom aff ellisii*; *Guapira*: *Tom aff ellisii*2 ITS, LSU

nonedes regioonides

Fungal community responses to precipitation. Glob. Change Biol. 17: 1637–1645.

nd 19 others. 2007. A global evaluation of metabolic theory as ; latituudi gradient: metabolismi teoori kohta pole tõendeid

rrings revisited: spatial autocorrelation and parameter estimation in geographical ecology. Ecography 30: 375–384.

ruumiline autokorr e

Mittelbach GG, Oberdorff TT, Porter EE, Turner JRG. 2003. Energy, water, and broad-scale geographic patterns of species richness. Ecology 84: 3105–3117.

The case of California butterflies. Am. Nat. 161: 40–49.

liblikatel ja taimedel pole diversiteedimuustrite regionaalses sarnasuses põhjuslikku seost, ise

m peremeeste ja kasvukohatüüpide rohkus, kotteeni lisaks ka ressurside rikkus. Arv troopikas on diversiteet suurim

nte ja alamrühmade BD maailmas, Inglismaal ja troopikas. Ekst. kõigi seente ja alamrühmade BD maailmas, Inglismaal ja troopikas. Ekstrapoleerimine taim:seen, putuk:see

Kapimaal looduslikud EcM puud puuduvad. Väidetavalt on EcM seeni korjatud Ida-Kapimaa metsadest (Knysna, Tsitsikamma)

specificity of *Pisonia grandis* (Nyctaginaceae). Mycorrhiza 22:647–652.

otions with inc. Mida stressirohkem on keskkond, seda suurem on pos interaktsioonis. Ellujäämise puhul on fasilitats tugevam; kasvu ja rproduts n

of Pinus arose in the fiery Cretaceous. New Phytol. 194: 751–759. Pinaceae tek 237 MYA (CI 19C)

ansfer from ectomycorrhizal pines to adjacent ectomycorrhizal and arbuscular mycorrhizal plants in California oak woodland. New Phytol. 170: 143–151.

ansfer between *Pisolithus* vahendab N liikumist Casuarina ja Eucalyptuse vahel. Transp on er suur kui Casuarina on Frankia noodulitega ja ECM > ECM > kontroll. Kui on hamiana is the N liikumine Eukalüptist kasuuriini sõltub suurel määral nii mükoriisest kolonisatsioonist kui kiirkbakterite olemasolust. Voog on kasuuriini arv seotütu, et

rength of ectomycorrhizal morphotypes of *Quercus douglasii*, *Q. garryana*, and *Q. agrifolia* seedlings grown in a northern California oak woodland. Mycorrhiza 18: 33–723. merede vs kontinentide biogeog vrd, probleemid. Väärad kalibreeringud eriti tektoonika jr (nt Panama kanal

rain species massings. J. Biogeogr. 33: 1066–1075. Nothofagus: arv Brassospora Uus-Kaled ja PNG-s kogu aeg olnud, al kriidist. Arv et see on peamine tekke

07–431. FIJI taimestik on arv seal evolutsioneerunud ja hüpanud ühelt saarelt teisele. Vanasti arv oli rohkem saari k

ironmental heterogeneity for productivity and mortality in a tropical tree plantation. J. Ecol. 96: 903–913. variation partitioning

izaceae (Pezizales). An. Jard. Bot. Madrid 66: S25–S32. Calongea gen nov. Maasiseste

Stafford K, Kumar L, Lee T, Hobart C, Trappe J, Vilgaly R, McLaughlin DJ. 2013. High diversity and widespread occurrence of mitotic spore mats in ectomycorrhizal P

alysis of fungal networks. Fung. Biol. Rev. 26: 12–29.

rough DNA barcodes. Proc. R. Soc. Lond. B 270: 313–321. DNA barcoding - triipkoodisamine esmane artikke

al kingdom. Biol. Lett. 6: 359–362. barcoding: töötab | barcoding: töötab hästi N-Am I

rough DNA barcodes. PLoS Biol. 2:e312. barcoding gap: esmane kasutamine; eristab hästi li

Molecular Evidence for the Early Colonization of Land by fungi and plants. Science 293: 1129–1133. seente ja taimede eristumine 119 prc

in strains from genetically isolated lineages of the ectomycorrhizal fungus *Paxillus involutus* s. lat. Mycorrhiza IN PRESS Pax invo: peremehe-spets ei sõl

recognition in the ectomycorrhizal fungus *Paxillus involutus*. Mycol. Res. 112: 965–975. Paxillus involutus koosneb 4 k

n in apatite amended and non-amended mesh bags buried in a phosphorus-poor spruce forest. Mycol. Res. 112: 681–688.

ltural land. Appl. Soil Ecol. 19: 71–78.

ikroobide BD põllumaa rekultiveerimine: külvati 4 vs 15 taimeliiki: mikroobide BD idiosünkraatiline, erinev 5 riigis, erinev 3 a jooksul, erinev töötlustes, ent kõikjal +-efek

gement on former agricultural land. Soil Biol. Biochem. 34: 1299–1307. 558–2562. Pseudoreplikatsiooni tüübid

esques d' Afrique et de Madagascar. 3–18.

re Francaise). Bull. Jard. Bot. l'Etat 25: 1–91.

sens -Fontana. Bull. Jard. Bot. l'Etat 28: 385–438.

rest soil CO<sub>2</sub> flux: uncovering the contribution and environmental responses of ectomycorrhizas. Glob. Change Biol. 13: 1786–1797.

o Scots pine seedling root and mycorrhizosphere compartments developed on reconstructed podzol humus, E-and B-mineral horizons. Plant Soil 259: 111–121.

a, Cenococcum; B: Suillus, Hymenoscyphus complex 3 RE ANOVA jt bakteriaal

et: vahe BD ja koosluses. Aastatega enne raiet istutatud puudel vähenes siledade morfotüüpide arvukus muude arvelt; pärast-lageraiet seosetu; vahe ka kauguses elusmetsasi

titutioning in ectomycorrhizal Scots pine seedlings. Soil Biol. Biochem. 42: 1614–1623.

icalyptus pilularis seedlings. II. The effect of ectomycorrhizas on seedling phosphorus and dry weight acquisition. Aust. J. Bot. 34: 445–454.

ironment affects birch leaf endophytes. New Phytol. 175: 547–5. endofüütide sagedus kaselehtedel seostud Ahvenenmaa saarte suuruse ja isoleeritusega

wood-wide web? Nature 394: 431. AM1 primer

wood-wide web? Nature 394: 431. AM1 primer

nizal fungi colonising Hyacinthoides nonscripta (bluebell) in a seminatural woodland. Mol. Ecol. 8: 659–666.

microbes emerge neutraalsed mutatsioonid ja geenidrift ning disp limitation põhj biogeog mustreid ookeani bakterite koosluses. Liigiteke on kiirem kui k

MSc Thesis. puisniidud: BD suurem Ida-Saaremaal ja Muhus, kus puisniite rohkem säilinud (metapop); BD seltub ümbritsevate puisniitude pindalast 10, 15 km raadiuses s suureneb

fractionation by basidiomycete fungi: Delta13C pattern and physiological process. Appl. Environ. Microbiol. 68: 4956-4964.

n of the ribosomal DNA spacers. Mycol. Res. 98: 37-43. ITS ja IGS1 RFLP trühvliikide eristamiseks. Liike eristavad hästi, tüvesid halvasti. Prain

rtin F. 1994. Monitoring the persistence of *Laccaria bicolor* as an ectomycorrhizal fungus. Mycol. Res. 98: 37-43. IGS1-RFLP; eristab hästi *Laccaria* nii liigisiselt kui liikidevaheliselt - suur varieeruvus

ectomycorrhizal fungi by amplification of ribosomal RNA genes. New Phytol. 120: 109-117. IGS1 (suured perekonnasisesed erinevused pikkuses: 500-900bp); I

Juured valesti määratud

oid lagunes: a preliminary analysis based on morphological and molecular data. In: Klitgaard BB, Bruneau A (eds.). Advances in Legume Mycorrhizal Research. Caesalpinioideae: morf süst: EcM pe

ssification and sequence-based identification of host-associated microorganisms. New Phytol. 205: 27-31.

Ecological implications of anti-pathogen effects of tropical fungal endophytes and mycorrhizae. Ecology 88: 550-558.

Shifting fungal endophyte communities colonize *Bouteloua curtipendula* in a grassland. juure-endofüütidel BD väheneb põhjast lõunasse (CAN-USA, N-Mex). Ent muld oli põhjas

ungal communities reveals sequences related to root-associated fungal endophytes. Microb. Ecol. 61: 239-244.

cuttings to study specific effects of mycobionts on plant morphology before, and in the early phase of, ectomycorrhiza formation by *Paxillus involutus* and *Piloderma crocospidium*. Mycol. Res. 111: 509-547.

Arkt: *Salix*, *Polygonum viviparum*, *Dryas octopetala* EcM; illustr. Phil. Trans. R. Soc. Lond. B. 359: 183-195. jää-aegade mõju taimeid migratsioonile ja geneetilisele divergeerumisele kvaternaaris: enamik laialt levinu

classification of the Fungi. Mycol. Res. 111: 509-547. seente klassifitseerimine hõimkonda

SSU tähelepanu pööratud resupinaatsetele seentele, palju vigu mt, nu LSU, SSU tähelepanu pööratud

ecay mechanisms, mating systems, and substrate ranges in homobasidiomycetes. mt, nu LSU pruumädanik on toenäoliselt tekkin

ECM vs saprotr; homobasidiomyc

id their plant hosts estimated using Bayesian relaxed molecular clock analyses. BMC Biol. 7: 13.

molecular and morphological taxon discovery in Fungi and options for formal classification of environmental sequences. Fung. Biol. Res. 5: 279-282. seeneliikide kirjeldamiseks kul

l mushrooms and puffballs inferred from ribosomal DNA sequences. Proc. Natl. Acad. Sci. U.S.A. 111: 129-133. mt DNA puguseened on arenenud vähemalt 3

nd? Nature Rev. Microbiol. 11: 129-133. keskkonnast pärit järjestuste tal

ns in the nuclear ribosomal DNA of mushroom-forming fungi. Mol. Biol. Evol. 13: 903-917. Grupp I intron; hibbett arvab, et on t

ty of *Lentinula*. J. Biogeogr. 28: 231-241. *Lentinula* edodes: kosmopoliit v. A. Euroopas, 7 eriklaadi, Ameerika ja Vana Maailma rühmad on teistest c

incompatibility in *Ceratobasidium bicorne*. Mycologia 95: 239-250.

*sidium bicorne* has an anamorph known as a conifer pathogen. Mycol. Res. 105: 105-110. Ceratobasidium: ITS v konserveerur

oollest Dothideomycetes, Sordariomycetes, Leotiomycetes, Endomycetes. Paljude 90% ITS kriteerium, ka 95, 97, 99%; lisaks LSU ja S Geoglossum-Trichoglossum on Pezi

usually caused by nonstandard means of dispersal? Ecology 84: 141-146. taimele juhuslik levik pika maa taha ei sõltu tava-levimistüübist. NZL on TAS-st kolonis taimed v palju miki

Wilson SD, Pärtel M. 2012. Plant species richness belowground: higher richness and new patterns revealed by next generation sequencing. Mol. Ecol. 21: 2004-2016.

Zobel M, Wilander L. 2004. Fungal diversity in a boreal forest: higher richness and new patterns revealed by next generation sequencing. Mol. Ecol. 21: 2004-2016.

Zobel M, Wilander L. 2004. Fungal diversity in a boreal forest: higher richness and new patterns revealed by next generation sequencing. Mol. Ecol. 21: 2004-2016.

Arbutoideae (Ericaceae): implications for the Madrea-Tethyan hypothesis. Arbutoideae fülogenees ja levik maailmas: levikutsenter Cal Arbutoideae fülogenees ja levik

Res. Bull. 2004: 233-253. Seisellide väikesaarte floora ja fauna võrdlus ning kaitseväärtus

gaceae): the contribution of the fossil record. Aust. J. Bot. 49: 307-314. nothofagus: ajalooline biogeograafia

. Lond. B. 359: 1537-1549. Austraalia kliima kriidist tänaseni: tugevad kuivenemised seoses Antarktikast eraldumisega ja hiljem. Fagal

reptibility of nectarivores. Asteraceae fülogeneet suhted seletavad 32% herbivooride põhjustatud kahjust. Asteraceae fülogeneet suhted se

163: 192-211 kõikidel makroorganismidel on biodiversiteedil laiuskraadi-gradient, mis on eriti tugev suur

*restriis* on outplanted Scots pine seedlings. Acta Mycol. 41: 313-318.

ges in the rhizosphere of *Pinus sylvestris*. Karstenia 39: 39-43. taimeid pms hapestavad mulda ATPaasid, selleks et saada kätte P, Fe. Reaktsioon NH4 ja NO3-le erinev, Al vältimiseks pH tõstmine. Mulda ka orgaanil

and *Cortinarius* species. Karstenia 39: 39-43.

lembola varies with the ectomycorrhizal symbiont. Mycorrhiza 5: 99-103.

ctus igas mullahorisondis, domin ka viljakahadena ISSR-RAPD>>>IGS Suillusele. 1 ISSR marker

horaceae). II. Svensk Bot. Tidskr. 64: 421-428.

horaceae). III. Svensk Bot. Tidskr. 68: 51-56.

spond to belowground exploration types. Plant Soil 327: 71-83.

m, availability, and mycorrhizal colonization affect biomass and nitrogen isotope patterns in *Pinus sylvestris*. Plant Soil 310: 121-136

al fungi correlate with nitrogen isotope patterns in plants. New Phytol. 157: 115-126. EBAKOMPETENTNE

nfluence water N ühendite konts mullas mõjutab taimele veekasutusefektiivsust. Suur transpireerimine on sageli seotud mitte kõrgendatud CO2 vajadusega kui hoopis mine

and tundra can estimate nitrogen cycling through mycorrhizal fungi: a review. Ecosystems 11: 815-830.

. 2014. Fungal carbon sources in a pine forest: evidence from a 13C-labeled global change experiment. Fung. Ecol. In press.

o nitrogen dynamics. New Phytol. 196: 367-382.

l mycorrhizal fungi mobilize nitrogen during litter decomposition. New Phytol. 173: 447-449.

velopment of mycorrhizae and nitrogen supply during primary succession: testing analytical models. Oecologia 146: 258-268.

ics of ectomycorrhizal and saprotrophic fungi from isotopic evidence. Oecologia 118: 355-371.

s. Biogeochem. 95: 355-371.

trophic and ectomycorrhizal fungi. Soil Biol. Biochem. 48: 60-68.

ctivation of ectomycorrhizal and saprotrophic fungi in natural abundance and 13C-labelled cultures. Mycol. Res. 108: 725-736.

2014. Fungal functioning in a pine forest: evidence from a 15N-labeled global change experiment. New Phytol. 201: 1431-1439.

ate use and assimilation by litter and soil fungi assessed by carbon isotopes and BIOLOG(R) assays. Soil Biol. Biochem. 35: 303-311.

termine the mycorrhizal status of fungi. New Phytol. 156: 129-136.

igi: the isotopic evidence. New Phytol. 150: 601-610.

ts. In: Buscot F, Varma A (eds.). Micro-organisms in Soils: Roles in Genesis and Functions. Springer: Berlin, pp. 385-404.

ngi. In: Dighton J, White JF, Oudemans P, eds. The Fungal Community. Its Organization and Role in the Ecosystem. CRC Press, Boca Rayton, FL, USA, pp. 361-370. 15N ja 13

ground allocation in culture studies. Ecology 87: 563-569.

f. 2009. Mycorrhizal fungi supply nitrogen to host plants in Arctic tundra and boreal forests: 15N is the key signal. Can. J. Microbiol. 55: 84-94.

and carbon flux rates in arctic tundra. Ecology 87: 816-822.

es do not mirror lagunemisprotsessi maa-alustele ja maa-alustele organite.e. Maa-alusteid kontrollib ligniini konts ja Ca; maa-alusteid määrab juurte jä

Arctic marine food web using d13C and d15N analysis. Mar. Ecol. Progr. Ser. 84: 9-18.

ates decomposition and acquires nitrogen directly from organic material. Nature 413: 297-299.

persion, interspecific competition and mycorrhizal colonization. New Phytol. 157: 303-314.

– the missing : heterotroofid on primaarsed asustajad, sest nad satuvad juhuslikult, elavad jäänustes ja kanduvad tuulega

le A. Zabinski mükoriisa mõju on eriti tugev siis kui N/P suhe on kõrge (P liimiteerib), sõltuvalt taime funktsionaalsest rühmast, mittesteriilsetes tingi

as. Kooslust mõj mullageogr ja taimepop, aga mitte nende koosmõju

spx, Cenoc ECM seente biodiversiteeti võib ülal hoida juurte "teadlik" selektiivne suretamine juhul kui ECM seedned on erineva konkurentsivõime ning kasulikkusega. S

ty in mycorrhizal interactions. Commun. Integr. Biol. 2: 110-112.

narket models: ress jagamisel põhinev mutualismi-protokooperatsiooni mudel kus arvest ress -de kättesaamisef, kättesaamiskomplem, ress vajalikkust. Seen vs bakter (N vs

corrhizal interaction: pines and false truffles. J. Evol. Biol. 20: 1 Rhizopogoni liigid ja männiliigid Californias ei ole spetsiifilised allo-ja sümpatrilisuse seisukohast; Inokul n

187: 286-300. MR seente ja taimede koevo ar

irg PF, Rogers JD, Peever TL, Carris LM. 2004. Fungal endophytes in woody roots of Douglas-fir (*Pseudotsuga menziesii*) and ponderosa pine (*Pinus ponderosa*). For. P

fungi along natural productivity gradients. Ecosystems 6: 739–746.

eling by fungi: kivimiproovid seenehyfidega. Erivanused. Mida vanemad, seda rohkem hüüfe.

endophyte communities in cupressaceous trees. Mycol. Res. 112: 331-344. >98% ITSi olid parimad liikide klastrid

atically diverse fungal endophytes. Appl. Environ. Microbiol. 76: 4063-4075.

99. Production of manganese peroxidase and organic acids and mineralization of 14C-labelled lignin (14C-DHP) during solid state fermentation of wheat straw v lakaas (m

:ka A. 1998. Oxidative decomposition of malonic acid as basis for the action of manganese peroxidase in the absence of hydrogen peroxide. FEBS Lett. 434: 26: malonaat

Microb. Technol. 30: 454-466. MnP: ülev

s of the Lyophylleae (Agaricales, Basidiomycota) based on nuclear and mitochondrial rDNA sequences. Mycol. Res. 106: 1043-1059.

ffects of nitroge metsakoosluste gradiendil produktiooni suurenemisega kaasneb pH alanemine, N tõus, C/N vähenemine, mikroobide biomassi tõus 20%, seente osakaalu v

rmton B, Hurry puud investeerivad maa alla augustis 6 x rohkem kui juunis; augustis EcMmood 39% mikroobsest biomassist mullas; seente viljakoh

adientid läbi veereziimi. N reostus ja puude koormine vähendab seentesse minevat C, ent ei mõj bakterite arvukust üldse. pH tõus iseenesest suurendab bakterite osakaalu. i

s one-third of microbial biomass and produces, together with associated roots, half the dissolved organic carbon in a forest soil. New Phytol. 154: 791-795.

rest: evidence from 15N abundance and foliar analysis. J. Ecol. 83: 217-224.

fractionation during nitrogen uptake by ectomycorrhizal and non-mycorrhizal *Pinus sylvestris*. New Phytol. 142: 569-576.

. 15N abundance of surface soils, roots and mycorrhizas in profiles of European forest soils. Oecologia 108: 207-214.

5N abundance of surface soils, roots and mycorrhizas in profiles of European forest soils. Oecologia 108: 207-217.

th and root respiration in boreal pine forest. Oecologia 132: 579–581.

puude koormisega

Zambia taimk Zambia taimkattetiübid Lawton1978 jr : tulest rã Zambia taimkattetiübid Lawton1978 jr : tulest räsitud Chipyas pole EcM taimi v.a. Pericopsis. Swartsia N

saprootroofid 13C sisaldus

ecology. Tren C-linge: mükoriisaseened vahendavad taimest tulnud süsinikku maa alla tundide ja päevadega. Juurte elumus 14C põhjal on palju suurem EcM juurteil kui ee

Uapaca , Monotes (Dipterocarpaceae) ja Brachystegia-Julbernardia, Afzelia (Caesalpinioideae) on ECM Tansaania

; (Tanzania). J. Appl. Ecol. 23: 676-688.

ECM taimed ida-aafrika savannis: Caesalpinaceae, ülevaade.

al habit of trees in mixed African woodlands. New Phytol. 115: 483-486.

Aafrika savannides EcM puid vaid miombo-tüüpi savannides, kus need domineerivad. Seal liimiteerib N, vihmametsas P; miombos ka P vähe, mist

79-203.

mplications of ITS rDNA sequences. Mycologia 92: 694-710. Cortinarius alamperekonnad, Rozites Cortinarius, Rozites, arutelu, võimal

s that detect quantitatively significant groups of butyrate-producing bacteria in human feces. Appl. Environ. Microbiol. 69: 4: 16S rRNA butüraatbakteritele: liigispets ja riil

es. Nature Rev. Genet. 4: 275-284. klassikalise filogeneesi: klassikalise

tremulae: puu kohta keskm. 4 genetit, paiknevad erikorgustel ja nakatavad toenäoliselt elusate okste kaudu, kui need surevad; juurtes puudub täielikult

ity of wood-decomposing fungi. FEMS Microbiol. Ecol. 12: 169-176.

ecetes in artificial systems based on variable inoculum sizes. Oikos 79: 77-84.

ics and possible horizontal transfer of group I introns between closely related plant pathogenic fungi. Mol. Biol. Evol. 16: 114-126. Grupp I intronite horisontaalne yleki

rea relationshi kõrgematel troofilistel tasemetel liigirikku kõrgematel troofilistel tasemetel liigirikkuse-pindala seos järsem ja tugevam

VK Paxillus erinevad isolaadid inokuleeritud tammedel ja pöökidel: eri-isolaadid IGS1 RFLP (5st 1 kõlbab), VIITED praimerite; IGS1 Paxillus

zales A, Duffy Ekstinktsioon mõj prim-prod samaväärselt vii tugevamini kui CO2 tõus ja muud kliimaatilised tegurid

Queenslandi N-osa; primaarses vihmametsas, kus domin Acacia, EcM pole. Arv nii on kõikjal N-AUS vihmametsades; sekundaarses EcM domine

Calif rohumaal: EcM taimi pole

rinus and dark-spored allies based on sequence data from the nuclear gene codir LR5, LR7, LR21 jt LR-praimerid LSU: Coprinus pole monofüleetiline

aus Patagonien: Singeromyces Moser, Paxillologaster Horak und Gymnopaxillus Horak. Nova Hedw. 10: 329–338. Singeromyces, Paxillologaster, G

yxacium and subgen. Paramyxacium. Sydowia 42: 88-168. Cortinarius: PNG, Malai, NZL Cortinariused uued liigid. Mitmed seot PNG, Malai, NZL Cortinariused uue

. Bulletin de la Societe Botanique Suisse 77: 362-375. Kesk-Aafrikas uued perek Tubosaet

. Zealand. N. Z. J. Bot. 9: 463-493.

Descolea levinud lõunapoolkera Nothofaguse metsades ja siin-seal Inc Descolea levinud lõunapoolkera Not

5-652.

tanica 18: 97-109. Boletused Tshili Nothofaguse metsades ei sarn NZL Boletustega. Uue Boletused Tshili Nothofaguse mets:

10: 157-205. Inocybe sect asterosporina PNGs, M

8: 202-208. PNGs uued seeneperek Fissolimbus

as, Boletales Austraalia ja ümbitsevatel mandritel. Arv et muu Agaricales, Boletales Austraalia ja ümbitsevatel mandritel. Arv et m Agaricales, Boletales Austraalia ja

255-309. NZL Hygrophoraceae: arv ainult per

172.

: Zürich, Switzerland. 40-111.

of eucalypt ectomycorrhizas. New Phytol. 109: 451-458.

1? New Phytol. 116: 297-301. terved (m

zal fungal communities are phylogenetically clustered at small scales. ISME J. 8: 2231-2242.

ion in bacterial **evol-ökol bakteritel: kooslused fülogeneet enamasti sarnasemad kui juhuslik; mõnedes kohtades ka erinevad = üledispersioon (eriti toitainerikkamates pai**  
on bacterial biodiversity. Proc. R. Soc. Lond. B 271: 113–122.

inev samas 3c **taimede ja bakterite liigi-pindala kõver soolasoos: taimede ja bakte bakterid: 16S rDNA** sekveneerimine, erinevad identsusastmed 95 **sörenseni indeks**, manta  
sity patterns along a gradient of primary productivity. Ecol. Lett **bakteritel vs produktiivsus gradient mesokosmostes. Eirirühmadel U- ja opt-trendid, MITTE**  
1 JA and 7 oth **kooseksisteerimine mikroobidel vs makro kooseksisteerimine mikroobidel vs makroobidel: Negatiivne assots oluline pea alati. Fingerj**  
is heterogeenne keskkond Imm3 skaalas; tähtis primaarprod -küürüköber; liigisiselt on biogeogr str, v suur erinevus levimisvõimes; kiire evol-võime nii mutatsioonide, k  
of the edible fungus *Lactarius deliciosus* field competition with *Rhizopogon* spp. Mycorrhiza 18: 69-77.

igus *Lactarius deliciosus*: effects of inoculation strain, initial colonization level, and site characteristics. Mycorrhiza 19: 167-177.

Martin F. 2012. Beech roots are simultaneously colonized by multiple genets in the ectomycorrhizal fungus *Laccaria amethystina* clustered in two genetic groups. Mol. Eco  
med C. 2013. Temperate eucalypt forest decline is linked to altered ectomycorrhizal communities mediated by soil chemistry. For. Ecol. Manage. 302: 329–337.

**xxx +taim** arcsin, t-test, anova  
sp1, Russ amoenolens, Russ xerampelina; vaid Tom sp1, Cort sp1 ja Rhizopogon **3 RE (seen ja taim: 28KJ, TW arutelu** Wilcoxon mitteparam.

**xxx** sekveneerimine: referentsi vähesus

d, Pilod fallax, Rhizop1; 40-a nulu seemikud: Russ xeramp, Pilod fallax, Cenoc; 400-a ebatsuga: Rhiz2, The1, Agaric1; 400-a nulg: Cort1, Russ1, Russ3; kokku 40-a: do  
ion in local scale. Plant Soil 244: 29-39. **ITS-tüüpide diversiteet: lokaalses skaalas väike, vaid ITS-tüüpide diversiteet: lokaalses sk**

ie gomphoid-phalloid fungi with an establishment of the new subclass Phallomycetidae and two new orders. Mycologia 98: 949-959. **Geastrales(Hysterangiales(Phallales-**  
hallomycetidae, Basidiomycota). Mycol. Res. 112: 448-462. **Hysterangiales: basaalsed on non-EcM; kosmopoliidid; EcM haru dest basaalne on levinud AUS. Üks tipr**

l emphasis on the position of *Sclerogaster*. Bull. Nat. Mus. Nat. Sci., Ser. B 34: 161-173. **Geastrales: koosn monofül Sph**

s of Boletaceae from tropical Asia: phylogeny, morphology and taxonomy. Fung. Div. 58: 215-226.

ental, spatial, and spatiotemporal components of species distributions. Ecol. Monogr. 81: 329-347. **mudeldamine paljud**

il analysis. Cladistics 13: 67–79.

maa-alade kladistilise v klasteranalüüsi asemel tuleb kasutada vikariantsusel põhin **biogeograafias maa-alad**

distribution in South America. J. Arn. Arbor. 87-95.

**Coccoloba: L-Am liigirikkuse kese Venezuelas ja Atlantilise Coccoloba: L-Am liigirikkuse l**  
**Coccoloba**  
) : 356-367.

egeration of *Nothofagus idaneb regener pms CWD-I ja üleskistud mullapallidel. Seemned idanevad pms hiliskevadel v varasudel; Arv tüvedes saavad juured paremini pe  
vs rotats-per 3 v 6 a: samad seemed puudel, ent mõj rot-periood*

· willows at former ore mining sites. Eur. J. Soil Biol. 44: 37-44.

i istanduses ilma stat vaheta; koosluse str ei hinnatud õigesti; 6 proovis 5-10 liiki; 10 proovis 8-11 liiki

Yong S, Mei-juan W, Yan-juan L, Li-si L, Langenfeld-heysler R, Eberhard F, Polle A. 2008. Effect of NaCl on growth and ion realtions in two salt-tolerant strains of *Paxil*  
r. J. Biogeogr. 33: 464-475. **Guajaana mägismaa pampade floristika, levik, ajalugu**

ic sequences in multiple sequence alignments. Bioinformatics 20: 2317-2319.

amunity composition in a woodland-forest ecotone. Mycorrhiza 18: 363-374.

: trees. Bioinformatics 17: 754-755.

**MrBayes: b MrBayes: baieesia tüüpi**

llassezia, *Cryptococcus*; antibiootikumid ja haigused põhj tugevaid nihkeid

accumulating in the public databases. Int. J. Syst. Evol. Microbiol. 53: 289–293. **kimäärsekvtside teke sarnae kimäärsekvtside teke sarnae dna korral (16S): lahend**  
l, mitteparam meetodid, head ja vead; VIITED **biodiversiteedi arvutami**

centage DNA sequence similarity for environmental species' delimitation across basidiomycete fungi. New Phyt **ühe viljakeha piiresITS heterogeensus: 50% esines**  
ribosomal ITS region of a *Flammulina* (Fungi, Agaricales) hybrid. Mol. Biol. Evol. 81:94-96.

L, Homer-Devine MC, Kane M, Krumins JA, Kuske CR, Morin **bakteritel jt mikroobidel: leviku tõenäosus sõltub levimisvõimest ja pop tihedusest; Hüpot. l**  
ers of bacterial beta-diversity depend on spatial scale. Proc. Natl. Acad. Sci. USA 108: 7850-7854.

99. **ei toeta liikide lognorm ja log-seeria jaotust, eelistab dünaamilist mudelit, kus üksikuid domin on v palju ja v palju ka haruldasi; Väidetavalt andmed lognorm**  
of *Pyrola japonica* Koreaas: suur populatsioonisisene diversiteet, väike populatsioonidevaheline erinevus vrs teiste sama eluviisiga liikidega **allosüümi**

ular phylogenetics of *Ramaria* and related genera: evidence from nuclear large subunit and mitochondrial small s **Ramaria LSU mitu er: Ramaria on** parafüleetiline (LSU, mt  
restry. III. Effects of commercially produced inoculum on container-grown Douglas fir and ponderosa pine seedlings. Can. J. For. Res. 16: 802-806.

ycorrhizal fungi in response to pH in vitro. Mycologia 75: 1983: 234-241.

**Pisonia grandise** leiud Tansaania ja mainib Seiselle

P+sekv vs kultuurid (rohumaadel sama, kultuuridel palju väiksem BD, RFLP bän **18 rDNA seenekloonide (EF4-fung5 )** kloonide RFLP+sekv vs kultuurid. RFLP bändid si:  
tion to shade. **Pyrola rotundifolia: varjus vs valguses kasvamine** ei mõjuta taime kasvu; kasv väga aeglane väljakaevatud ja ümberistutatud taimedel. Looduslikus kohas ko  
obal temperature variability despite changing regional patterns. Nature 5 **Kliima** varieeruvus jääb globaalses mõõtnes samaks, ent põhjapoolkeral on suurenei

es from 16S rDNA clone library sequences. J. Microbiol. 42: 9-13. **fülogeneetiline statistika**

ssp. *Rugosa* i **Lepp** saab 85%-100% N Frankiate kaudu, fikseerib u 40 kg N/ha aastas

l how would w **liigirikkuse ja energia seosed; energia on** ressursside kättesaadavus ja produktiivsus ja selle otseseim näitaja on laiuskraad. Energia sc  
tomol. 93: 533-535.

. Ecol. Monogr. 54: 187-211.

**kriitika ühele pseudorep**

i reply to Oksanen. Oikos 104: 591-597.

**pseudoreplikatsioonitüü**

us recovery of RNA and DNA from soils and sediments. Appl. Environ. Microbiol. 67: 4495–4503.

**DNA ja RNA** eraldamine mullast: 1% CTAB/2% SDS me

y of arbuscular mycorrhizal fungi and patterns of host association over time and space in a tropical forest. Mol. Ecol. 11: 2669–2678.

cosystem funct **Naemi ja Tiilmani tööde kriitika: tulemustes varjatud töötlused, vale interpret**

tion in vitro by **varase staadiumi seemned nakatavad perem taimi ilma lisa Glc sootmes, samas kui hilise st saaned tahavad lisa-Glc ja sel juhul võivad nakatada ka mitte-pere**  
-114.

hizal fungi. Mycologia 81: 587-594.

ulture. II. The enzymatic degradation of selected carbon and nitrogen compounds. Can. J. Bot. 68: 1522-1530.

**EcM kar**

tatus of *Catathelasma imperiale* in North America. Mycologia 84: 472-475.

**Catathel**

rsity of mycorrhizal fungi from single plants of *Caladenia formosa* (Orchidaceae). Ann. Bot. 104: 757-765.

ingus *Tricholoma matsutake*: sequence, structure, and phylogenetic analysis. Mol. Cells 8: 251-258.

**Tricholoma** matsutake 18S ja IGS2 ehitus ja pikkus ja sekt

4, Dissanayake AJ, Glockling SL, Goonasekara ID, Gorczak M, Hahn M, Jayawardena RS, van Kan KAL, Laurence MH, Lévesque CA, Li X, Liu J-K, Maharachchikumb  
rttrand Y, Oxelman B, Hartmann M, Kausserud H, Ryberg M, Kristiansson E, Nilsson RH. 2013. Incorporating molecular data in fungal systematics: a guide for aspiring res

## d ja Tomentellad

sive, but highly selective club. *New Phytol.* 185: 598-601.

. *Descomyces!*, *Amphinema*

from fungal ne **Pyroleae: varjutamine ja juurkontaktide läbilõikamine** ei suurenda oluliselt heterotroofsust; *Chimaphila* käitub nagu autotroof city is not a bottleneck for the germination of *Pyroleae* species (*Ericaceae*) in a Bavarian forest. *Mol. Ecol.* 22: 1473-1481.

bs through carbon and nitrogen stable isotope analyses. *Ecol. Res.* 25: 745-756.

. Does chemi **mida tüübirikkamad on mändide monoterpeenid**, seda suurem on alustaimestiku (rohudid, kõrred) liigirikkus. Üksikud monoterpeenid ei korrel liigirikkuseg t results on orchid mycorrhizal fungi in Hungary. *Acta Biol. Hung.* 61: S68-S76.

in the diversity of the mycorrhizal fungi of orchids as a function of the water supply of the habitat. *J. Appl. Bot. Food Qual.* IN PRESS.

ectomycorrhizal ammonia fungi in warm temperate forest in Japan. *Mycoscience* 49: 42-55.

phic *Afrothismia gesnerioides* (*Burmanniaceae*). *Can. J. Bot.* 84: 852-861.

:scr *Ectomyc* 4: 127-133.

aa; samas tugev korrelatsioon temperatuuriga

is. London, UK: HMSO.

nev

ds). *PCR Protocols: A Guide to Methods and Applications.* Academic Press: ??? **kõigi PCR komponentide optii kõigi PCR komponentide optimeerimine**, anning 55\*-72 ctomyc. 9-10: 21-25.

characterization of mycelia of some Tuber species in pure culture. *New Phytol.* 1 Tuber sp

binant manganese peroxidase genes in ligninolytic fungus *Pleurotus ostreatus*. *Ap RT-PCR MnP transkriptide mootmiseks* **MnP geen**

s a specific association with two *Ceratobasidium* root-associated fungi across its range in eastern Australia. *Mycoscience* 48 231-239.

*Hymenoscypha ericae*), taksonitest *Russ/Lact* (35), *Sebacina* (17), *Tomentella/Thel* (16), *Inocybe* (15), *Cortinarius* (10)

min sageduselt ja ohtruselt

ctivity of ectomycorrhizal fungal spores in relation to their ecological traits during primary succession. *New Phytol.* 180: 491-500.

munities of *Vaccinium* roots in two contrasting boreal forest types. *Soil Biol. Biochem.* 42: 234-243.

etic production **Pyrola incarnata autokoloogia: lehed keskmiselt 1,5a**; suuremine maapealsetel osadel koguaeg, maasisestel pms augustis; maasiseste osade proportsioon 25 p

studies: how **mikrokosmosed, poollood tingimused, mensur katsed**, vaatluskatsed: levik, kestvus, liikide & gener arv jms stat **mikrokosmosed, poollood**

it. 168: E1-E14.

**interaktsioonide võrgustikus m**

00 m *Dipterocarpaceae*, 1700 m *Fagaceae+Leptospermum*, *Tristaniopsis*, 2700m, 3100m *Myrtaceae*. Seente liigirikkus suurim 1700m peal

a, *Trich. Aestuans*, *Lact glycosmus*, *Pilod fallax*; käänd: *Suillus variegatus*, *S. Luteus*, *Trich. Aestuans*; rahnud: *Piloderma fallax*, *Piloderma byssinum*, *Pilod. Reticulatum*. K ycorrhizal fungus *Tricholoma robustum*. *Can. J. Bot.* 70: 1234-1238.

:xpression of nitrogenase genes (*nifH*) from ectomycorrhizas of Corsican pine (*Pinus nigra*). *Environ. Microbiol.* 8: 2224-2230.

n of endobacterial communities in ectomycorrhizas by DNA- and RNA-based molecular methods. *Soil Biol. Biochem.* 39: 891-899.

Rhizopogon; sugukonniti *Russulaceae*, *Thelephoraceae*, *Piloder*. **Ektomükoriisase RFLP eristas tüüpe**, mille erine **ITS1 kriteerium** 4% identsust. Uu **kõikal kasutati rarefakti** 'enoc; 75\*: *Rhiz olivaceotinctus*, *Rhiz roseolus*, *Rhiz arctostaphyli*. Olul erin *Wilc*, *Cenoc*, *Rhiz olivaceot*. *Arv Rhiz eosed on kuumutamisele üsna vastupidavad*, arv *Rhiz* (

**ike hektari kohta**

us, *Rhiz2*, *Cenoc*; nulg: *W. Rehmii*, *Cenoc*, *Pezizales* sp, *Cadophora finlandica*. *Domin Rhizopogon* spp ja kottseened vrd vana metsa kooslusega.

s of the latitudinal diversity gradient. *Science* 314: 102-105.

**troopika on nii liikide tekke allikas kui vanade muuseum**. Hüpotees, et troopikast järjest uued liigid asenda

ological patter: **evolbiool vs paleoökoloogia: ülevaade** evolbiool vs paleoökoloogia: ülevaade

tances and DNA from environmental samples. *Appl. Environ. Microbiol.* 63: 4993-4995.

**DNA puhastamine** humiinainetest on efektiivsem sepharos

tic relationships among *Phialocephala* species and other ascomycetes. *Mycologia* 95: 637-645.

*Helotiales* SSU, LSU: *Phialocep*

tion of forest, woodland and savannah biomes. *Phil. Trans. R. S. Aafrikas kaasaegsete biomide teke: katteseemnet domin al hiliskriidist: palmi ja pandanimetsad. Paleotsee **anulatus: RAPD eristab** paremini kui SI*

ulations of *Suillus granulatus* as determined by in vitro mycorrh **Suillus granulatus**: feneetiliste tunnuste ja ECM mood edukuse põhjal mitu väliselt eristamatut liiki: laia peir random spatial structuring of orchids in a hybrid zone of three *Orchis* species. *New Phytol.* In press.

rrhizal associations with tulasnelloid fungi among populations of five *Dactylorhiza* species. *PLoS ONE* 7:e42212.

and nested subset structure characterize mycorrhizal associations in five closely related species in the genus *Orchis*. *Mol. Ec OrM-le*

2011. Analysis of network architecture reveals phylogenetic constraints on mycorrhizal specificity in the genus *Orchis* (*Orchidaceae*). *New Phytol.* 192: 518-528.

cts on tree seedling emergence and growth. PhD Thesis. Swedish University of Agricultural Sciences, Umea, Sweden.

gi. *Ecology* 77 **mikrokosmoste head ja vead uurimaks nematoodidel** parasit seeni

ts of Australian and African ectomycorrhizal fungi in mixed eucalypt plantations. *New Phytol.* 192: 179-187.

mmunity nutrit **arv et AM-süsteemis C-liikumine taimest taimel** üldiselt ei toimi. Pettus võib olla, et osad taimed panustavad üh süsteemi vähem, anastomoseeruvad hüüfid v

id

la juhul], ECM kirjeldused. Erin rakuseinte paksuse, mantli mustade laikude ja risomorfide noodide poolest. Fülogeneetiliselt 2 v 3 klaadi, mis arv alamliigid

ti vähemusmorfotüübid, 4 a piires samas paigas suht püsivad

moisture in gra **mulla veesisaldus üldiselt väiksem preerias kui metsas; koikuvam** kui vosas ja metsas, tugev aastaajaline fluktuatsioon

NA spacers and its relation to breeding structure of the widespread **Schizophyllum** commune DNA heterog: IGS2>IGS1>ITS. Kogu maail **Schizophyllum** commune DNA heter: **Rozellomycota** pakuvad **Cryptoc**

ode. *Bioessays* 34: 94-102.

**seente algne fülogenees** 6 geeni baas

tion of fungi using a six-gene phylogeny. *Nature* 443: 818-822.

al diversity of ITS rDNA sequences in *Glomus intraradices* assessed by cloning and sequencing, and by SSCP analysis. *Mycol. Res.* 106: 670-681.

tion by differe **AM 1 vs 2 vs 3 AM-seent**. Mitme seene puhul mõju biomassile aritm. Keskmine eri liikidemõjule

. *Bot. Buitenzorg* 14: 53-205.

ies say about the latitudinal diversity gradient? A new look at the **enamik taksoneid** on tek ja seetõttu ka edaspidi radieerunud troopikas; pärast teise bioomi l

s developed from expressed sequence tags in the ectomycorrhizal fungus *Hebeloma* SCAR praimerite konstrueerimine EST andmebaasi põhjal *Hebeloma cylindrosporum*ile. (enotüübid RFLP, RAPD)

*Cenococcum geophilum* and *Lactarius* sp. in relation to soil water potential in five beech forests. *Plant Soil* 255: 487–494.

*Nat.* 104: 501 **kitsa peremeesringiga herbivoorid ja parasiitseened mõj taimede dominantsust**

*Nat.* 311: 1893-1896. **Kolumbia-Venetsueela taimede mitmekesisus 60-20 MAT: tugevasti kõikuv, korreleerub jääaja miinimumi**

netic species delimitation in ectomycorrhizal fungi and implications for barcoding: the case of the *Tricholoma scalpturatum* complex (**Tricholoma scalpt kompleks: 3** s s. str. (Basidiomycetes: Boletales). *Plant Biol.* 1: 701-706. **Paxillus involutus: tüüpliik rabamäni**

*Cortinarius* ja *Russ-lact*

angi in spruce wood by restriction fragment length polymorphism analysis of amplified genes encoding rRNA. A **DNA eraldamine** puidust: täisprotokoll, täiensused, probleemid / and historical biogeography of the genus *Tuber*, the 'true truffle' **Tuber pärit Euraasiast.** *JagunebV* grupiks (*puberulum*, *melanosp*, *rufum*, *excavatum*, *aestivum*). *Perek. Tekst.* 109: 107-116.

nowledge: toward a global map of life. *Trends Ecol. Evol.* 127: 151-158.

of birds in space **lindude radieerumine on ajas erinev, aeglasem** Kesk-kriidis ja K-T piiril; erinevates linnurühmades ja **lindude radieerumine on ajas erinev**

between *Frankia*, *Glomus* and *Alnus* at different soil phosphorus regimes. *New Phytol.* 123: 307-311.

template for ocean acidification data. *Earth Syst. Sci. Data Discuss.* 8: 1–21.

in an unmanaged *Picea abies* forest in Sweden. *For. Ecol. Manage.* 115: 203-211. **3 RE saprotoofidel** puidust ja söötmelt eraldatult

inguish fungi of the rice sheath-blight complex, *Rhizoctonia solani*, *R. Oryzae* ar **praimerid Thantephoruse** eri liikidele riisil **praimerid Thantephoruse** eri liikidele

here and their significance for sustainable agriculture. *FEMS Microbiol. Ecol.* 48: 1–13.

*Ustilago* spora; kask: *Cenococcum* **xxx, PCR sõltub tugevasti proovi hoidmisajast**

in young alders grown **Leppadel suur potentsiaal biokütusena**

2007. Soil nutrients influence spatial distributions of tropical tree species. *Proc. Natl. Acad. Sci. USA* 104: 864-869.

er using pine trees with a distinct stable carbon isotope signature. *Funct. Ecol.* 19: 81-87.

*Nat. Ecol. Evol.* **ECM seente levik närliliste, kukrulistelt jt väikeste ECM seente levik närliliste, kukrulistelt jt väikeste imetajatega: efektiivne, kaugel, mahamattmine; evolutsioon**

diversity does **taime genotüüpide liigirikkus vähendab seene T-RFLP peakide arvu; arv et mõni genotüüp soosib seeni, aga need ei pääse domineerin**

ngem *Carex flacca* mullas madalam pH, [N], [C]kogu) kui taimede mono ning s **bakterite liigirikkus RT-PCR-DGGE bändide põhjal kõrgem** *Carex flacca* monokultuuris j

regulate the function, community structure, and diversity of mycorrhizal fungi? *J. Exp. Bot.* 56: 1751-1760.

anal studies of grassland mycorrhizal mycelial networks. *New Phytol.* 152: 555-562.

mycorrhizal mycelium of an upland grassland: short-term respiratory losses and accumulation of <sup>14</sup>C. *Soil Biol. Biochem.* 34: 1521–1524.

traits: intraspecific diversity of mycorrhizal plants and fungi in ecosystems. *New Phytol.* In press.

g JPW, Read DJ. 2004. Plant communities affect arbuscular mycorrhizal fungal c **AM liigirikkus: T-RFLP + branch ja bound algoritmi puu jaoks + AM liigirikkus: T-RFLP**

pendence and mullapatogeenide negatiivset tagasiside üle USA; mida liigirikkam on kooslus, seda suht tugevam efekt. Põhineb Dickie et al kommentaari **modulite valik ning**

*col. Evol.* 19: 101-108.

levaade: optiimalne, adaptatiivsus, N ja CO<sub>2</sub>, invasiivsed liigid, maakasutuse muutus

**along the mutualism-parasitism continuum.** *New Phytol.* 135: 575-585.

mitation is a driver of local adaptation in mycorrhizal symbioses. *Proc. Natl. Acad. Sci. USA* 107: 2093-2098.

genetic signal in biological traits. *Bioinformatics* 26: 1907-1909. **adephylo - picante ar**

of polycyclic aromatic hydrocarbons (PAHs) both within and beyond the rhizosphere. *Environ. Poll.* 142: 34-38.

plants: a new aspect of rhizosphere interactions. *Agronomie* 23: 495-502.

of a local assembly of denitrifier communities. *ISME J.* 4: 633-641 **nirK ja nirS** geenide globaalne fülogeograafia: reageerivad keskkonnale erinevalt. **nirK** genee mõj (oksalladi)

soils – misconceptions and knowledge gaps. *Plant Soil* 248: 31–41.

iesmikumullal: sama, suur liikide kattuvus eriti segakultuuris; 3a jooksul suurenes oluliselt

mycorrhizal symbioses in willow ectomycorrhizas and their changes with time. *New Phytol.* 119: 99-106.

mycorrhizal *Eucalyptus coccifera*: growth response, phosphorus uptake efficiency and external hyphal production. *New Phytol.* 140: 125-134.

ferences in <sup>15</sup>N uptake amongst spruce seedlings colonized by three pioneer ectomycorrhizal fungi in the field. *Fung. Ecol.* 2: 110-120. **ruumiline autokorr:**

EcM fungal communities to long-term fertilization of lodgepole pine (*Pinus contorta* var *latifolia*) stands in central British Columbia. *Appl. Soil. Ecol.* 60: 29-40. **ensüma**

mycorrhizas alv: **ECM ja AM sümbioosi kui parasitismi-mutualismi kontinuum: sõltuvus genotüüpidest, keskkonnast, konkurentsist, ajafaktorist, ; arv MR moodustades taimse**

toot (11), *Pseudotsuga* (4), *Inocybe* (4). *Cenococcus* arvukus suurenes langis sees ja *Cort* vähenes. **ECM see**

õletatud vs terve metsas

. Discovery of novel intermediate forms redefines the fungal tree of life. *Nature* 474: 200-203. **Cryptomycota nimi Rozellidale**

19-226. **mikstroofus: protistidel fagotroofus on algne** staadium, mikstroofuse teke lihtne. Mikstroofidel oluline roll C ja P ringes planktonikooslustes

ng phylogenetic methods: accounting for uncertainty of phylogenetic inference ar **fülogeneetiline koosluse struktuur: meetodika eristamiseks kasut: fülogeneetiline koosluse**

**õrm vs lämmastik-** suure erinevused; domin *Cantharellus tubaeformis* **3RE, RFLP 4 megamorfootüübist (random)**

mycorrhizal community in an oligotrophic Swedish *Picea abies* forest subjected to experimental nitrogen addition: above- and below-ground views. *For. Ecol. Manage.* 13: 153-157

ssulaceae (*Lactarius rufus*), *Cortinarius* spp. **3 RE** **liigisisene ja** liikide vaheline varie PCA

s 4 vana metsa (peale põlengut) vs ECM

rhizid mycorrhizal fungus from tropical Africa. *New Phytol.* 83: 121-128.

rise tüüp mõj koosluse struktuuri. *Cenococcus* proportsioon kasvas orgaanika ja tanniinide kontsentratsioonis kasvades

efektiga; vahe eripinnasel eripuudel

**sula, Lact.)** **xxx, Taxotron** **t-test**

procal spetsialiseerunud vastastikune spetsialiseerumine on väga harv nähtus interaktsioonide ökoloogias, juhuslik

*col. Evol.* 19: 101-108. **PhyloWidget fülopuude visuaalne**

l: connectance, dependence asymmetries, and coevolution. *Am. Nat.* 129: 657-676. **network analüüs**

on of glycogen, starch, and other insoluble polysaccharides during ontogeny of *Paxillus involutus*-*Betula pendula* ectomycorrhizas. *New Phytol.* 140: 331-341.

fungus-growing termites as weathering agents. *Eur. J. Soil Sci.* 53: 521-527. **termiidid**

diversity opposing *Pseudomonas* bakterite tüvede rikkus ja geneetiline erinevus suurendavad koosluse funktsionaalset erinevust ja teise bakteriliigi kasvu

and related *Pseudomonas* bakterite tüvede rikkus ja geneetiline erinevus suurendavad koosluse vastupidavust. Lihtsal toidul liigirikkus inhibeeris v

ga, mida pidas koniidideks  
helised vs albi **albiinude vahene fitness esialgu takistab MH taimede laia levikut ITS**  
ixotrophy in orchids: insights from a comparative study of green individuals and r ITS  
ironments: a c **seente suktessioon: ülevalde. Primaarne ja sekundaarne suktessioon. Arv põhj suktessiooni eri mustreid seentel mitmesug filtrid: liigifond, keskkonna sot**  
ital difference **eri taimed omastavad NH4 erisügavusest eri efektiivsusega. Seda võib muuta omavaheline konkurents, võib mitte muuta**  
t rohkem kandseeni (mulle tundub, et saproobid). Väidet eri kooslused mullas ja juurtel, kuigi suurem osa klaadidest kattusid (ei testitud). N eff pole  
rad sademed: efekti kooslusele ega liigirikkuusele polnud ei liigi ega klassi tasemel  
; the rhizoid environment of the liverwort *Cephaloziella* varies in Antarctica are **SSU** **kimäärid; blasti otsing kimäärid; blasti otsingud muude tule**  
lophytic fungus, *Phialocephala fortinii*, at a primary successional site on a glacier **RAPD DSE kultuuridele**  
**Dark septate** **Dark septate**  
**D: liustiku taandudes domin. Eosepanga seened, hiljem ECM seened ja kott-ning** **18S, chimera check, kimääride suur probleem; üsna imelikud seened eriti eospanga-koosl**  
ary successional glacier forefront: rDNA sequence results can be affected by pri **mullaseente sekv mullast prim** **mullaseente** sekv mullast primerid EF3/4 ja nuSSU 0817/1  
bacteria exhibit a bipolar distribution. Proc. Natl. Acad. Sci. US **bakteritel globaalselt: mida poolusepoole on levila keskosa, seda suurem on levila (Rapopor**  
Monogr. Biol. **Varzea taimestik ja ökoloogia: EcM liike pole peale Salix humboldtiana**  
idue removal, and nonsymbiotic nitrogen fixation in forest soils of the inland Pacific Northwest. Can. J. For. Res. 22: 1172-1178.  
Jain TB. 1997. Impacts of timber harvesting on soil organic matter, nitrogen, productivity, and health of inland northwest forests. For. Sci. 43: 234-251.  
i of the horizontal spatial structure of soil fungal communities in seente ruumiline autokorr tugevam O horisondis kui A horisondis  
as *Tuber melanosporum* on ka säilinud. Segane **vs mikroskoopia: suur vahe, loll teadlane**  
fication of a host plant for the desert truffle *Terfezia pfeilii* by molecular methods. **Terfezia ja 3 rohttaime: Terfezia pfeilii viljakeha ja a Terfezia ja 3 rohttaime: Terfezia pfe**  
v, Murphy DV. 2015. Exploring the transfer of recent plant photosynthates to soil microbes: mycorrhizal pathway vs direct root exudation. New Phytol. 205: 15 eksudeer  
l, Zechmeister-Boltenstern S, Sessitsch A, Richter A. 2010. Belowground carbon allocation by trees drives seasonal patterns of extracellular enzyme activities by **N ja giru**  
areous grassla **seemnepank: oluline roll taimede levimisel peale häiringut, ent olul** **isem liigirikkuuse ja tousemete rohkuse kohalt seemnepank + seemnevihm. Vaid 1 liik levis**  
**ITS1-4, 5 RE**  
ccaria; *Phialocephala* väga sage endofüüt eriti *Laccaria mantlil* **5 RE**  
PCR). J. Biosci. Bioeng. 96: 317-323. **PCR bias: ülevalde ja lahendused: primer bias sõl**  
icrosatellite markers of a *Pisolithus* sp. from a Eucalyptus plantation. Mol. Ecol. **RAPD markerite loomine (SC, RAPD markerite loomine (SCAR, ISSR) Pisolithus -eukal**  
: *Pisolithus* 2 spp (AUSst arv), *Inoc*, *Tomentella* (arv AUSst), aff. *Choiromyces* 85% (arv AUSst)  
phylogeny of ectomycorrhizal *Pisolithus* fungi associated with pine, dipterocarp, and eucalyptus trees in Thailand. Mycoscience 44: 28 **Taimaal** **sissetoodud eukalüptic**  
soil mimcroar **kõdude segu laguneb kiiremini kui on enn** **ustatav üksikkomponentide järgi. Segudes oli üpalju rohkem Oribatida**  
Martin FN, Levesque CA, Blair JE. 2010. The promise and pitfalls of sequence-based identification of plant-pat *Phytophthora* määramine ITS põhjal: probleemid  
aponica and *P. Pyrola* ja *Chimaphila*: kõrge homosügootsus, sarn ametid u 10 m sees samast genetiist **ensüümkr**  
a terrestris. FEMS Microbiol. Lett. 161: 151-156. **eksolakaa**  
e with special reference to *Wakefieldia macrospora* (Hymenogastraceae, Agaricales) and *Geopora clausa* (Pyronemataceae, Pezizales) *Wakefieldia* kuulub *Hymenoga*  
feedback contr **pioneeritaimed vohavad uudsete mikroobidega mullal, ent kiiresti järgnev neg tagasiside; Hilisemad ei saa algul käima, ent hiljem kogi**  
**gisisene ja liikidevaheline** **3 RE, liikidesisesed ja -vahelis RFLP usaldatavus** **xxx**  
us tree pathogen *Heterobasidion annosum* during early infection of scots pine. Fu **Heterobasidion annosum cDNA rmtk**  
aal liigirikkam ja kooslused erinevad  
*Ehaliotis* C. 2009. Effect of continuous olive mill wastewater applications, in the presence and absence of nitrogen fertilization, on the structure of rhizosphere-soil fungal co  
ific variation in growth responses of lodgepole pine. Plant Ecol.  
inum in ectomycorrhizas: a quantitative assessmet using meta-analysis. Ecology 89: 1032-1042.  
geneous mycorrhizal symbiosis in a rare epiphyte is unrelated to broad biogeographic or environmental features. Mol. Ecol. 22: 5949-5961.  
In: Kasesalu H (ed). Year-book of The Estonian Naturalists' Society vol. 74. pp. 101 – 121. Valgus, Tallinn (in Estonian; abstract in English).  
luating the pho **P sisaldus kontrollib kõdu lagunemist ja varisekihi paksust troopikas (L-Am)**  
i seedlings. Mycorrhiza 6: 451-454.  
t-Tyl sp1,2  
Akd. Nauk. U: **RUS Eur-põhjaosas: EcM Polygnum viviparum, Dryas octopetala, Salix spp, Betula spp, Picea obovata, Arctostaphylos alpina, Pyrola**  
ctics of Phyllanthaceae inferred from Wve genes (plastid atpB, matK, 3 ndhF, rbcL, and nuclear PHYC). Mol. Phyl. Evol. 36: 112–134 **Uapaca: lähilike sugukonnas Phylla**  
ing MAFFT and LAST. Bioinformatics, in press. **aligneerimine; lisatakse uued jr**  
racy of multiple sequence alignment. Nucl. Ac. Res. 33: 511-518.  
n 7: improvements in performance and usability. Mol. Biol. Evol. 30: 772-780. **Lühikeste Lühikeste sekventsic**  
ment program. Brief. Bioinform. 9: 286-298. **Mafft Mafft**  
stem for multigene phylogenies. Syst. Biol. 56: 523-531. **WASABI: multigeneetilise info**  
t ka vahtra  
ushroom's spore size and timing of fruiting are strongly related: is moisture important? Biol. Lett. In press.  
iving parts of boreal forest bryophytes. Botany 86: 1326-1333.  
ay fungus *Phellinus nigrolimitatus* (Basidiomycota). Can. J. Bot. 80: 597-606. **ITS, IGS1, EF** **homokaarüonidel pol** **ITS var P nigrolimitatusel 20/730 ja**  
**is rosea: lokaalselt ja populatsiooniti sarnased, siiski kõrge heterosügootsus** **ITS, IGS, mtLSU, mtSSU, ISSR**  
neer wood-decay fungus *Trichaptum abietinum*. Mycologia 95: 416-425.  
heritance in the basidiomycete *Trichaptum abietinum*: implications for reticulate c **Trichaptum: mitu ITS ja IGS v Trichaptum: mitu ITS Trichaptum: mitu ITS ja IGS variant**  
ryptic species of the cellar fungus *Coniophora puteana* (Basidio **Coniophora puteana** levikukese N-Am **Coniophora puteana** levikukese N-A  
yptic species of the cellar fungus *Coniophora puteana* (Basidiomycota). Mol. Ecol. 16: 389-399.  
nsiflora saplings by inoculation with *Lyophyllum shimeji*. Mycologia 89: 228-232.  
**nsiflora** saplings by inoculation with *Lyophyllum shimeji*. Mycologia 89: 228-232.  
jr: v hea max ühtlases kk-s, vilets norm-tingimustel (taimed). Konservatiivne kui n<B, optimistlik kui n>B; R2 ei saa kasutada ekstrapol headuse h **liigirikkuuse** **modelleerim**  
ectomycorrhizal fungi of *Pinus cembra* in pure culture. Mycol. Res. 100: 989-998.  
its of the tribe Pomaderreae (Rhmannaceae) using internal transcr **Pomaderreae on** **levinud üle AUS ja NZLs paiguti, endeemsed. NZL-sse levinud iseseisval Pomaderris mit**  
tic and chitinolytic enzymes in forest soil. PLoS ONE 5:e10971. **praimerid tsellulolüütilistele seente ensüümidele. Rohkem genee leit** **praimerid**  
nberg SP, Webb CO. 2010. Picante: R tools for integrating phylogenies and ecology. Bioinformatics 26: 1463-1464. **Picante pakett Ris fü**



ee community. **fülogeneet str taimekoosluses Barro Colorado**: sekund taimekattega ja per kuivadel aladel esines klasterdumine, soistel aladel ja nõlvade relationships between phyllosphere bacterial communities and plant functional traits in a neotropical forest. Proc. Natl. Acad. Sci. USA 111: 13715-13720.

bly: assessing the performance of community phylogenetic structure tests. Ecol. Lett. 12: 949-960. nullmudelid fülogeneetilise str

tulemused Chao1, Sace jt; VIITED bakterid: erinevate BD e

achusetts, USA

J. Bot. 39: 1079-1085. Phialocephala gen nov

oheterotrophic *Hexalectris* Raf. (Orchidaceae: Epidendroideae). Mol. Ecol. 20: 1303-1316.

seeded ja bakterid T-RFLP ja ARISA ordinatsioon Monte Car

actions, comm **konkurents EcM kooslustes ja katsetes: kas määrab taim v seen? Metoodika**

rhizal competition between two Rhizopogon species colonizing Pinus muricata seedlings. New Phytol. 166: 631-638.

rhizal fungi in Mexican Alnus forests support the host co-migration hypothesis and continental-scale patterns in phylogeography. Mycorrhiza 21: 1-10.

v Tom subuliacina s.l. Puudel on eksitud - Tom lateritia ja Tom galzinii, Lact spinosulus UNITEst poleilmselt lepaga seotud. Kahelt alalt leitud ka l

mong three ectomycorrhizal fungi and their relation to host plant performance. J.Ecol. 95: 1338-1345.

ga: Russula1, Ascomycota1, Sebacia; Lithocarpus: Agaricales1, Ascomycota1. 2 RE, taimel trmL + Alu; sekv 1 praimeriga; ITS1F/ITS4 sarnasuskoeff, t-test

Scaling up: examining the macroecology of ectomycorrhizal fungi. Mol. Ecol. 21: 4151-4154.

zal fungi: are priority effects a rule or an exception? Ecology 90: 2098-2107.

e of the ectomycorrhizal symbiosis between Rhizopogon species and Pinus muricata. Plant Soil 291: 155-165.

: elurikkus, pea kõik sagedasemad seeneliigid mõlemal peremehel

rsity as a barrier **põllul mida suurem taime diversiteet, seda suurem resistentsus invasioonidele**

*lasiocarpa* and *Picea engelmannii*. Can. J. Bot. 75: 1843-1850.

entella, *Amphinema*, *Pseudotomentella*; vs ECM: väga erinev, domin Cortinarius

judel seentel esineb peremeespuu-eelistus, ent spetsiifilisust mitte. Kask erineb okaspuudest suht rohkem

: *Thelephora* sp., Hymenosc., *Phialophora*; Ala2: *Thelephora*, *Phialophora*, Hyme 2 RE; NL6C fpraimer; kogu ju **panevad kokkute** ja kandade ITSid samasse algneeringusse

multiregressioon, CA

öötmes 4 RE; subalpi vöötmes

520. arv taimed ja seened induts biol. Mitmekesisust vastastikku

terial diversity associated with subalpine fir (*Abies lasiocarpa*) ectomycorrhizae 1MHB:ARDRA 16S phi-indeks

. A general suite of fungal endophytes dominate the roots of two dominant grasses in a semiarid grassland. J. Arid. Environ. 74: 35-32.

ction in two different types of soil. Plant Soil 50: 719-722.

Global patterns of plant diversity and floristic knowledge. J. Bio **taimede liigirikku**se globaalne analüüs inimõjusid arvestamata: Suurim Borneol. Inimõju ja liigirikkus k

n CR, Kowalchuk GA, Hart MM, Bago A, Palmer TM, West SA, Vandenkoornhuyse P, Jansa J, Bücking H. 2011. Reciprocal rewards stabilize cooperation in the mycorrh

rsity in phaner **korallrifidel korallide mitmekesisusest sõltub ökokatastroofiga kaasnev muutus liigilise koosseisus, mitte aga vastupidi. Toetab kindlustushüpoteesi**

on of basidiospores of the ectomycorrhizal fungus *Suillus bovinus*. Mycorrhiza 17: 563-570. Flavonoid

throughput method to extract high yields of good quality DNA from fungi. Mol. Ec **DNA eraldus seenekultuuridest uus ja kiire meetod, mis arv ei sobi juurtele n**

re of a tropical semideciduous forest in the Chiquitania region. **Neea hermaphrodita** on rohkuselt teine puu Boliivia kuivas heitlehises metsas

: tribes Scutellineae and Sowerbyellae (Pyronemataceae, Pezizales, Ascomycetes). Mycologia 78: 735-743. Acervus ja Caloscypha on sarn Aleu

leuriidae in the Pyronemataceae (Pezizales, Ascomycetes). Mycologia 78: 407-417. septade ultrastr järgi saab ära tunda

worth DL (ed.). Ascomycete systematics: Problems and Perspectives of the Nineties. Pp. 127-141. septade ultrastr järgi saab ära tunda.

ol. Ecol. 7: 1151-1161. *Alnus glutinosa*: L-Eur ja Aasias populatsioonid mitmekesisel. Alpideist ja Karpaatidest põl

ngerprinting closely related *Xanthomonas* pathovars with random nonamer oligonucleotide microarrays. Appl. Environ. Micro **Xanthomonas** eritüve Tüvede eristamine PCA

*Tuber* spp.) inferred from sequences of four nuclear loci. Mycologia 103: 779-794 .

thin Entoloma inferred from molecular phylogenetic analyses. Fung. Biol. 116: 1250-1262. Entoloma: Rosaceae-seotud har

dini: BD väheneb 25-50%. Taluvate seas on rohkesti Pyronemataceae esindajaid ja Rhizopogon

tel BD madalam kui varasematel; koosluse str erineb põlenud vs mitte aladel, ent põlengu vanusel polnud mingit efekti

uillus granulatus SAMPLING EFF arvelt, eriti niiskes (vrd kuivas). 8 ensüümi rohkus ei seleta taime biomassi kasvu

16-517.

ginases by *Panerochaete chrysosporium*: effect of selected growth conditions and use of a mutant strain. Enzyme Microb. Technol. 8: 27-32. ligninaasi

elin J, Prin Y, **eukalüpti invasioon arv tänu mürgisele varisele ja allelokemikaalidele. Eukalüpt mõjutab risof bakterite kooslust DGGE ja funktsionaalset mitmekesisust ne**

towards novel approaches to modelling biotic interactions in multispecies assemblages at large spatial extents. J. Biogeogr. 39: 2163-2178. kooseksisteerimise a

l continuum of tropical rain forests differing in N availability on Mount Kinabalu, Borneo. Plant Soil 229: 203-212.

iversity: impac **taimede BDI suurem efekt juure mikroobikooslustele kui indiv taimede efekt või kohaliku vs eksoot päritolu ef. Kohalikel taimedel rol**

California pine forests. Mycologia 95: 603-613. Rhizopogon ECM-kultuurist 2RE

ric Atheliaceae sp; mä kontr: Russ decol, R paludosa, vinoso; Kuusk lubi: Tyl aster, T fibrill, Helot sp1; ; Cenoc; Ku kontr: Tyl aster, Pilod1, Cenoc

: *Tylospora fibr* tundlik N suhtes. Ühtlasi väheneb ka mükoriisade arv ja mütseeli ohtus

ubartic mire community share fungal root endophytes. Fung. Ecol. 3: 205-214.

in roots by **nested PCR and SSCP (Single Stranded Conformation Polymorphism) SSCP AM-seentele**

ella1, *Tomentella*2; EcM: *Russula nigricans*, *Lact subdulcis*, *Inoc peltiginosa*, *Cort anomalus*; taksonitest Russul **Kloonidest 20.7% olid NM-seened ja liikidest proovi koht:**

j-maal suurem seente BD kui metsas ja põllumaj-maal T-RFLP (ARDRA): ITS1F-ITS4 -mahajäetud põllumaj-maal suurem seente BD kui metsa

tiivselt seeni CO2-rohkuses enam t-RFLP, 2 RE ??? ITS praimerid, nendega manipuleerimine täpsuse saavutan

; ; v palju Sordariales, Hypocreales, Helotiales

verall diversity and dominance of microdiverse relationships in salt marsh sulphur **kimääridest hoidumine: 15 tsül kimääridest hoidumin kimääridest kimääridest hoidumine:**

och AM, Facelli JM, Facelli E, Dickie IA, Bever JD. 2010. For **AM olemasolu** seletab 18%-57% taime BDst v liigirikkusel

: 651-652. **Laccaria bicolor tapab collembolaid ja transpordib 15N taimesse**

veness in communities. Nature 417: 67-70.

arius obs, vilets illust

J, Myrold DD. 2010. Ectomycorrhizal mats alter soil biogeochemistry. Soil Biol. Biochem. 42: 1607-1613. EcM ma

18. Host generalists dominate fungal communities associated with seeds of four neotropical pioneer species. *J. Trop. Ecol.* 24: 351-354.  
van FC, Knight R, Kellwy ST. 2011. Bayesian community-wide culture-independent microbial source tracking. *Nat. Meth.* 8: 761-765. **proovi koosluse struktuuri**  
-2635. **fülogeograafia populatsioonidel: ülevaade ja Templetoni NCA mahate fülogeograafia fülogeograafia populatsioonidel**  
3-612. **meetodid fülogeograafias**  
n North Europe **uibulehelised: vähene putuktölmlemine, taimed võimelised iseviljastuma, kuid mitte apomiktiliselt. Seemned v väikesed (viited edasi)**  
fungus *Trichaptum abietinum*. *Mol. Phyl. Evol.* 23: 112-122. **mch, ITS1, ITS2, spets ITS1 praimerid** **Trichaptum abietinum: 3 ortoloogset**  
fid kollapseeeruvad

diation of TNT-contaminated soil. *Acta Biotechnol.* 22: 67-80.

EcM taimedel lehtedes P konts kõrgem, ent kui arvestada fülogeni seoseid, siis mitte. Muud lehtede omadused sarnaselt EcM ja muudel taimedel. *Arv. J. Bot.* 10: 1-10.  
Wolf M, Schultz J. 2010. The ITS2 Database III - sequences and structures for phylogeny. *Nucl. Ac. Res.* 38: D275-D279. **ITS2 sekundaarstruktuuri and**

**Ellesmere CAN: EcM taimed Kobresia, Salix arctica, Dryas integrif., ebaharilikest ka Pedicularis capitata (2/8), Saxifraga oppositifolia (3/4), Cassiope tetragyna (1/1),**  
noodi struktuuri kirjeldus [tundub, et siiski pole ektoga tegemist, sest mantel väga laiguline ja HN väga nõrgalt arenenud]. **Neocudoniella radicea kuusejuure**  
-308. **seente liigitamise mehhanismid: ülevaade**

ik M. 2011. Ericaceous dwarf shrubs affect ectomycorrhizal fungal community of the invasive *Pinus strobus* and native *Pinus sylvestris* in a pot experiment. *Mycorrhiza* 21: 1-11.  
mics of 13C natural abundance in wood decomposing fungi and their ecophysiological implications. *Soil Biol. Biochem.* 37: 1598-1607.

**13C diskriminatsioon** eristab EcM seeni ja saprotroofe

*Soil* 244: 307-317.

ing fungal DNA from ectomycorrhizal roots. *Biotechniques* 32: 52-56. **DNA ekstaheerimine: alternatiivne meetod**

*Pinus resinosa* EcM juured lagunevad mõnedel seeneliikidel kiiremini kui teistel liikidel ja kui NM juured

between *Pisolithus tinctorius* and other forest-floor microbes. *New Phytol.* 150: 179-188.

biotrophy-saprotrophy continuum. *New Phytol.* 178: 230-233. **lagundar**

rv EcM-del ajalist erinevust ei esine, kuna juuretippud elavad suht vanaks. Uurida võiks eri juurekohortide tasemel. Arvutiproge abil leidsid 3 kontrastset mustri EcM seeni  
d pine plantations in Pennsylvania, USA. *Plant Soil* 219: 57-69.

ns of *Pinus resinosa* and ectomycorrhizal fungi. *New Phytol.* 140: 539-547.

*Pinus resinosa* plantation. *New Phytol.* in press

la; ECM: Cenococcum **ECM seente pms vältivad interakts omavahel, pms dominantidel: DNA eriline ekstaheerimine** mullast + TRFLP ITS1F-ITS4 ann 49°C 2 RE mõl ottest; s  
10; ECM Cenococcum, Lactarius, Tylophilus, Clavulina ;; 1 juuretippu anal -Ceno T-RFLP mullast

y herbs in deciduous forest. **potis kasvatatud Pyrola japonica: lehed kuni 3-a, varjulehe tüüpi FS. Mõningane FS ka sügisel ja talvel**

ui M, Urushigawa Y, Stahl DA. 2002. Parallel characterization of anaerobic toluene- and ethylbenzene-degradin. **16S rDNA j 16S rDNA** ja in vitro transkribeeritud rRNA (*Pinus sylvestris*). *Mycol. Res.* 96: 215 - 220.

Asia. 213 pp. Fungiflora, Oslo.

x

*Tomentella* sp

and S, Høiland K, Kjølner R, Larsson E, Pennanen T, Sen R, Taylor AFS, Tedersoo L, Vrålstad T, Ursing BM. **andmebaas ITSle** **andmebaas ITSle**

pinate Hymenomyces. *Karstenia* 40: 71 - 77.

x

real-time PCR a **AM seente liigirikkus sõltub taimede liigirikkusest**, mull DNA eraldus mulda läbi pestes EDTA-Triton lahusega; FastDNA Spin Kit F  
ree species in a cross-inoculation experiment. *J. Ecol.* 99: 1394-1401.

**Angianthus, Waitzia (Asteraceae), Poranthera (Euphorbiaceae), Styliidium (Styliidiaceae), Gompholobium Pultanaea (Fabaceae), on ECM sünteesides nii Labyrinthomyces,**  
vires: a meta-analysis. *Ecology* 90: 2088-2097.

ened (Wilcoxina, Cenoc jt.), Atheliaceae; kiiretel Atheliaceae ja Thelephora terr jt.

derma reticulatum, Amphibys, Mel bicolor, Amphibys, Sh 4 Tylosporat, 2 Wilcoxinat, 3 Amphinemat, 4 Pilodermat, 4 Thelephorales. Arv et metsas puuindiv arv läbi genee  
edle litter from slow- and fast-growing Norway spruce (*Picea abies*) clones; *Microb. Ecol.* 56: 76-89.

suurlinna läheduses, korreleerub okkakahjustustega

**Havai EcM infektsioonid** vaid sissetoodud *Coccoloba*; *Pisonia umbellifera* jt AM v NM

dunes. *Can. J. Bot.* 53: 87-93.

**ri metsatüüpides.** Kõikjal v.a. Männiistandikes EcM seeni polnu Keenia: sademed märts-mai; Oct-Dec

. *Byssocorticium caeruleum* sp. nova, and new combinations in *Dendrothele* and *Pseudomerulius* (Basidiomycota). *Ann. Bot. Fenn.* 48: 37-48.

inoculation with feces of tassel-eared squirrels. *Mycologia* 76: 758-760.

**symbiondid maksasammaldel: Jungermanniales: Sebacinaceae + mõned tundmatud kottseened; Aneura pinguis: Tulasnellales. Jungermannoidne mükoriisa**

establishing mycorrhizae in coniferous tree seedlings. *Trees* 1: 191-194.

skventsitüübid kattuvad minimaalselt, ent täpsed järjestused mitte grupisiseselt liikidel kattuvad!; orhideedel ja kanarikulistel Sebacinales liigid ei kattu!, ent grupi-sees ki  
lar bodies of Cenococcum geophilum Fr. mycorrhizas as detected by electron energy loss spectroscopy. *New Phytol.* 129: 411-416.

dua and *Picea abies* by *Suillus grevillei*. *Trees* 2: 115-128.

tes in the hyphal sheath of ectomycorrhizas -the soil-root interface. In: ??? (eds). EUROSILVA -Contribution to Forest Tree Physiology. Les Colloques, Dourdan, France.  
:ogumises

lomycetes belonging to the 'rust' lineage (Pucciniomycotina) form mycorrhizae with terrestrial and epiphytic neotropical orchids. *Proc. R. Soc. Lond. B.* 277: 1289-1298.

h status of trees in diverse forest stands in West Germany. In: Hüttel RF, Mueller-Dombois D (eds.). Forest Decline in the Atlantic and Pacific Region. Pp. 189-201. Springer  
of exotic and native plant species on the structure and function of soil microbial communities. *Soil Biol. Biochem.* 35: 895-905.

desert truffles: new species and a highly variable species complex with intrasporocarpic nrDNA ITS heterogeneity. *Mycologia* 103: 841-847. **Terfezia clavaryi, leptoderma** si

juure mood sklerootsiume -just nagu *Morchella*. Peremeestaimi palju

stavaid tüüpe Ungaris

ffle genus to accommodate *Terfezia gigantea*. *Mycologia* 100: 930-939.

**Imaia, gen nov (sõsar Leucangia)**

ia disappears from the American truffle mycota as two new genera and *Mattirolomyces* species emerge. *Mycologia* 103: 831-840. **Stouffera, temperantia/marcell**

zia ja Robinia vahel pole samuti mingi EcM. Helianthemumi ja Robinia korteksirakud lagundati, eriti kõrgete P konts juures, hüüfid tungisid teeli ja endodermisesse, põhj

of fungal infections of *Ammophila arenaria* (Marram grass) roots by Denaturing (DGGE: *Ammophila arenaria* ja DGGE  
:composti inokul vs kontr DNA ei hävine peale autoklaavimist  
s. 2012. Disentangling the drivers of beta diversity along latitud beta-BD globaalselt: kui võtta arvesse Gamma-BD, siis efekt puudub: Lin ef asemel unimoc  
y assembly, and the phylogenetic structure of ecological communities. Am. Nat. 170: 271-283. Fülogeneetilise struk  
ommunity asse topograafia määrab Yasunis puude nishid  
y of dry grass: ölandi suure alvari geobotaanilised kooslused, kokku 4. Üks olulisemaid *Helianthemum oelandicum*-*Galium oelandicum* kooslus -väga ohukesel ja kuival kü  
u  
comus badius, *Piceir* parallella; mitesaast: *Amphinema*, *Hydnum rufescens*, *Piceir oleiferans*, *Cenococcum*  
l. Sci. Prague 6: 9-15.

ANOVA

n foliar nitrogen concentration and d15N along productivity gradients of a boreal forest. Ecosystems 13: 108-117.  
rikkusele ja kooslusele ümberistutuskatsete põhjal: ökotüüp NS, Kooslust mõj prooviala ja eriti selle produktiivsus. Ökotüübi looduslikul distantsil  
; laggeraie: *Thelephora* domin tugevasti; vana mets: *Paxillus*, *ITE6=Tylospora*???  
ccinum, *Lactarius*; Lageraie puudeta: *Thelephora*, *ITE2=Elaphomyces*???, *Cenoc*  
il (madalam liigirikkus, domin *Amphinema*, *Thelephora*, *Laccaria*) kasvanud istikutel vs ümberistutamine lagedale (muudab kooslusi sarnasemaks. Domineerima hakkavad  
, *Cenoc*, *Russula decolorans*; tsuugal *Russ occidentalis*, *Lact pseudomucidus*, *Cenoc*, *Amphinema*; juurekontakti osas sama  
Phylogenetic interaktsioonide networkid on fülogeneet determineeritud mooduliteks. Parasiitide peremehed on pigem interaktsioonide networkid on f  
skaya NP, Pou parasiitide - lestade ja kirpude fauna-kooslus sõltub närliliste taksonoomilisest ja fül kaugusest; distant parasiitide distantsimaatriksite j  
in ecological t peremehe-spetsiifika kirpudel: regionaalselt fülogeneet signaal puudub, ent kontinentaalskaalas on see olu peremehe-spetsiifika kirpudel:  
ground growth of white spruce seedlings with roots divided into different substrates with or without controlled release fertilizer. Plant Soil 217: 131-143.  
snelloid fungi (Basidiomycota) - a model for early steps in fungal symbiosis. Funç *Tulasnella* praimerid LR2Tulrev,  
Proc. Natl. Acad. Sci. USA 104: 5925-5930. taimede globaalne liigirikkus 110x110 km ruutudel: pos tegurid energia, sademed, mägisis  
mainib esmakordselt *Coccoloba* EcM ilma kirjelduseta

the Boletales. Mol. Phyl. Evol. 13: 483-492. mt atp6 , cox3 praimerid Rhizopogon: viited html  
:al the below ground distribution of genets in two species of *Rhizopogon* forming *Rhizopogon* 2 spp genetid EC Rhizopogon 2 spp genetid ECM järgi: SCAR praimerid G  
from 38 recognized species of *Suillus* sensu lato: Phylogenetic and taxonomic im ITS: *Suillus* spp. Suillus spp: sisaldab *Boletinus*, *Fusc*  
gon vinicolor species complex based on analysis of ITS sequences and microsat ITS Rhizopogon s villosuli liikide ühend  
identification of mycorrhizal fungi in *Neuwiedia veratrifolia* (Orchidaceae). Mol mt LSU rDNA ML3LIN-ML6  
orhoidne MR, ühest pelotonist, mch-DNA  
kveneerimise jr, eriti streptokokke (arv PCR artefakt, mistõttu lõigati streptokoki-restriktasiga DNA katki IRW). Paljud bakterid ei kasvanud kultuuris  
Luteyn JL. 2002. Phylogenic classification of *Ericaceae*: molecular and morphological evidence. Bot. Rev. 68: 335-423. Ericales matK, rbcL, morph  
plex microbial community fingerprints using pairwise similarity measures. J. Mic geelitatud mikroobiprofiilide statistiline võrdlemine: igale jooksul geelitatud mikroobiprofi  
sequestate genus in the *Agaricaceae* with evidence for adaptive radiation in western North America. Mycologia 104: 164-174. Cryptolepiota = end. Am. Giga  
archipelago with biogeographical evidence for a paleotropical origin. Fung. Biol. 114: 790-796. Inoc tauensis Samoalt - korjatu  
w sequestrate genus in the *Agaricaceae* with evidence for adaptive radiation in western North America. Mycologia 104: 164-174.  
l performance on monokaryons and reconstituted dikaryons of *Laccaria bicolor*. Can. J. Bot. 66: 289-294.  
er of the Basic arv *Cercocarpus* on ECM -seotud *Gigasperma americanaga* Gigasperma americanum sp nov -arv  
ogia 74: 479-488.

VDI

itavatest ka *Cenococcum*, *Rhizopogon* spp, *Suillus* spp  
nities associated with *Populus tremula* growing on a heavy metal contaminated site. Mycol. Res. 112: 1069-1079.  
and purification of total community DNA from soil. J. Microbiol. Meth. 39: 1-16. DNA eraldamine: fenool-kloroformi etapp v oluline; lüsi  
ciation between *Quercus robur* and *Piloderma croceum*. New Phytol. 163: 149-157. Piloderma  
rence data for systematics and phylotaxonomy of arbuscular mycorrhizal fungi from phylum to species level. New Phytol. 196: 970-984 AM seentele SSU, ITS, LSU re  
tection of *Glomeromycota*: one PCR primer set for all arbuscular mycorrhizal fungi. New Phytol. 183: 212-223.  
olatile compounds. Can. J. Bot. 49: 1425-1431. Suillus va  
oxalate in lignin biodegradation. Proc. Natl. Acad. Sci. 90: 1242-1246. oksalaat s  
l community resemblance methods differ in their ability to detect biologically relevant patterns. Nature Meth. 7: 769-775. Ordinatsioonides eri  
-ground competition shapes tree regeneration in invasive *Cinnamomum verum* forests. J. Ecol. 95: 273-282.  
on of ectomycorrhizal eucalypts for plantations. Mycol. Res. 96: 273-277.  
*Leotia lubrica* arbutoidne mükoriisa *Comarostaphylosel*  
r filtering in trait analysis. Glob. Ecol. Biogeogr. 18: 745-758. ruumilise ja fülogene  
rth U, Finlay RD, Tuomi J. 2003. Severe defoliation of Scots pine reduces reproduc samal uurimisalal tuberkuloidne ECM: *Suillus bovinus*, *S luteus*, *Rhizopogon* sp  
n in the ontogeny of orchids of the temperate zone. Russ. J. Ecol. 32: 408-412.  
eg. Sci. 2: 711 Laelatu puisniit: suurem valgus, vähesem sigade tuhmine, niitmine suurendavad taimede BD  
ids of rare vase Eesti taimkatte elemendid: haruldaste taimede levik (pms Lä-Saaremaa, Hiiumaa), levilapiirid jm haruldust põhjustavad faktorid  
roportsionaalset osakaalu ja juurte koguarvu nulul. Cenoc talub hästi varju ja vajab ilmselt vähem C kui *Lactarius*  
rDNA ITS regions within and between anastomosis groups in *Rhizoctonia solani* ITS Thanatephorus cucumeris=Rhizocto  
ctonia solani to anastomosis group 2-1 (AG2-1) on account of rDNA-ITS sequence similarity. J. Pl. Pathol. 82: 61-64.  
SAR, Chatelain C, Sosef M, Barthlott W. 2004. Africa's hotspo Afrika floristika hotspodid: 2004 uuendus BIOTA-AFRICA põhine. Suuresti kattub Myersi omaga ja katt  
izosphere, plant stress, and herbivory affect the abundance of microbial decomposers in soils. Microb. Ecol. 45: 340-352.  
acting species of saprotrophic fungi. Mycol. Res. 99: 1128-1130.  
l. 177: 297-300.  
ds using multiple stable isotopes. Oecologia 110: 262-277.  
odendron vaid elusjuurtes (ka kasel ja männil); *Geomyces*, *Gymnoascus*, *Pseudogymnoascus* ja pigem seigseenend kōdujuurtes

own or closely **arv et ECM seente dikariootsed genetiidid** in korpor endisse haploidseid eoseid et säilitada potentsiaali  
ecies Lophozia: **Lophozia-peamiselt asex levik -idanemine aprillis, vähenedes järsult sügiseks.**

Fenn. 16: 208-212.

ization of differentially expressed genes in the mycelium and fruitbody of *Tuber borchii*. Appl. Environ. Microbiol. 68: 4574- **geeni**spressioon trühvli viljakehas vs müte  
rF, Green JL, Pollard KS. 2013. Global marine bacterial biodiversity peaks at high latitudes in winter. ISME J. in press.

Biogeography of Australian Rhamnaceae, tribe Pomaderreae. J. **Rhamnaceae -Pomaderreae (ecm)** Austraalias: pms ida ja lääne vaheli **Rhamnaceae -Pomaderreae (ecm)** A  
nd the phylogeny of large genera in the plant family Myrtaceae. **Myrtaceae: Eucalyptus (Australia), Eucalyptopsis (Uus-Guinea), Arill** **Myrtaceae: Eucalyptus (Australia), I**  
s. Aust. Syst. Bot. 18: 1-3.

. Res. 111: 1075-1099.

**Pezizales** maaaluste viljakehad

velopment in forest nurseries. Acta For. Fenn. 77.2.

9.3.

or. Fenn. 106: **1-72.**

i in plant diver **taimede elurikkus SW AUS** lokaalses skaalas seletab pH, mis tuleneb kohaliku liigifondi kohastumisest.

in forest management. Int. J. For. Res. 2012:263953.

SEM metsandustööd

nsformed white spruce on soil fungal communities under greenhouse conditions. FEMS Microbiol. Ecol. 76: 199-208.

isof: liigirikkus ja koosluse str sama; mõjutab mullahorisont ja aeg

aceae. Syst. Bot. 28: 326-332.

**Polygonaceae: Coccoloba** sõsarriihn

soils. I. Effects of density and time of application of inoculum and phosphorus amendment on mycorrhizal infection. Soil Biol. Biochem. 6: 167-171.

soils. II. Effects of density and time of application of inoculum and phosphorus amendment on seedling yield. Soil Biol. Biochem. 6: 173-177.

**omycorrhizal** **vastupidavus temperatuurile: eosed=oidid>klamüidosp (arv Helotiales spp)>>hüüfid**

gies change with soil age. Trends Ecol. Evol. 23: 95-103.

ter stress of *Pinus pinaster* inoculated with ten dikaryotic strains of *Pisolithus* sp. Tree Physiol. 10: 153-167.

r potential at the soil-root interface of *Pinus pinaster* seedlings inoculated with different dikaryons of *Pisolithus* sp. Tree Physiol. 10: 231-244.

/orrhiza formation by *Pisolithus arhizus* on *Pinus pinaster* and *Pinus banksiana*. New Phytol. 115: 689-697.

matricial phase of *Pisolithus* sp.

liome development on current photosynthesis of *Pinus strobus* seedlings. Can. J. For. Res. 24: 1797-1804.

**W-AUS** lubjakivi koopas >10 m sügaval *Eucalyptus gomphocephala* EcM juured tumepi morfotüübiga

al agents for e **mükofagne kukkurrott sööb pms Mesophellia, Zelleromyces** ja *Labyrinthomyces* eoseid. Eosed idanevad ja mood EcM vaid siis kui rott on need ära sööm  
noc 7 cort5

plants to rocks: ectomycorrhizal fungi mobilize nutrients from minerals. Trends Ecol. Evol. 16: 248-254.

oksalaat: 1

orans; E1: *R. decolorans*, *C. collinitus*; E2: *C. sp.*; B: *Piloderma* sp1, *P. sp2*

**ITS1F-4B, annealing 500**

mõga

ne, vale interpretatsioon

ification of ectomycorrhizal mycelium in soil by real-time PCR compared to conventional quantification techniques. FEMS Microbiol. Ecol. 45: 283-292.

reen and everg **Pyrola: suurem assimileerimine kevadel ja sügisel, igihaljas; vrd igih taimedega väiksem FS varieeruvus**

**Atlantilises BI** **Atlantilises BRA** vihmametsas **domin AM** mürdilised; **ainsaks uuritud EcM** taimeks *Coccoloba rosea*. *Coccoloba* on BRA sh Atl vihmametsades laialt levint  
the Pezizales (Ascomycota): phylogenetic analyses of SSU rDNA sequences. Nordic Journal of Botany 17: 403-418.

**Pezizales: SSU:** jagunevad 3 kladid

oodfellow (ed.), Nucleic acid techniques in bacterial systematics. John Wiley & Nu-SSU-515f ja Nu-SSU-1391r praimerid

d molecular characterization. In: Stocchi V et al (eds) Biotechnology of Ectomyc **trühvlid: IGS vs ITS vs RAPD** eri liikidele. IGS varieeruvad kui ITS

i three ectomycorrhizal truffles. FEMS Microbiol. Lett. 134: 109-114.

**chs, kitini süntetaasi** geen trühvlitel: sarn eriliikidel väh 91.5%, aminohapetel palju vähen

irikusest, sest *Fraxinus* rikub ära. Basaalpinna ja juurte biomassi järgi puude diversiteet v sarn

namus liike laia peremeheringiga

ogy 84: 2302- **ECM peenjuured** lagunevad aeglasemalt kui mitteECM peenimad juured; Seeneosas rohkem N, P, ent kuni 60% kitini ja seetõttu lagun aegl. ; arv sõltub st  
007. *Paxillus involutus* mycorrhiza attenuate NaCl-stress responses in the salt-sensitive hybrid poplar *Populusxcanescens*. Mycorrhiza 17: 121-131.

/stem function: **bakterite BD vs funktsionaalsus: mida roh bakterite BD vs funktsionaalsus: mida rohkem liike, seda kõrgem metaboolne akt ja väikser**

n influences in vitro ectomycorrhizal synthesis on the European aspen *Populus tremula* L. Mycorrhiza 18: 297-307.

root decomposition: the post-mortem fungal legacy. Ecol. Lett. 9: 955-959.

of polymorphic simple sequence repeat loci in *Armillaria ostoyae*. Mol. Ecol. No **RAPD, SCAR markerid** *Armillaria ostoyae*

fungus *Paxillus involutus*. New Phytol. 106: 139-146.

oksalaat:

i *Paxillus involutus*. Plant Soil 110: 3-8.

oksalaat:

l fungal inoculum. New Phytol. 100: 585-593.

:alcifuge, of the mycorrhizal fungus *Paxillus involutus*. New Phytol. 100: 93-104.

sociated with **eukalüptid: pH, ECM vs AM**

ung. Div. 49: 93-100.

**Oomycota:** basaalsed rühmad n

ned ja Ciliates

zella form the deepest branching clade of fungi. Protist 161: 116-121.

is and pyrolaceous plants in northern California. Can. J. Bot. 58: 2274-2279.

analysis of phylogenetic trees. Mol. Biol. Evol. 16: 750-759.

**Monte Carl Monte Carlo** Bayesi pro

**a fallax = bicolor** = croceum ja eristamine *P. Byssinum* värvi, tsüstidioolide, eoste, basiidide jr

Thesis. Göteborg, Sweden: University of Göteborg

tes with emphasis on aphylliphorelean taxa. Mycologia 95: 1037-1065.

**ITS, LSU, viited eripraimeritel .**

**russuloidse** klaadi liigid. *Albatrellus*

d.

**ITS1F/4B**

*Gloeocystidiellum*

pine forest in northern Fennoscandia. Mycoscience 52: 289-295.

**Lyophyllum:** palju lähedasi liik

Hymenochaetales: a molecular phylogeny of the hymenochaetoid clade. Mycologia 98: 926-936.

11: 1040-1063.

**staim** vananedes liigirikkus ja BD kasvavad. 2 a: *Laccaria*; 3: *Thelephora*; 4: *Hebeloma*, *Inocybe*, *Lactarius pubescens*; 6: *Cortinarius*, *Leccinum*, *Peziza*, *Ramaria*

lora and its mycorrhizal fungus *Epulorhiza* sp. Biol. Plant. 54: 97-104.

species diversity. In: Ricklefs RE, Schluter D (eds). Species Diversity in Asia-Europe. Seepärast et Aasia külgnev subtroop region, ei liigenda E-W mäestiku struktuuri üle. New Phytol. 161: 51–58.

õlenud mullal madal BD; sh paar kottseent, Tomentella sp.

Plant Soil 170: 23-33.

Vihmausside arvukus soojas temperaatses ja troopilises vöötmes ühtmoodi kõrge. Arv vihmalegüminosae implicates a rapid diversification of lineages during Leguminosae tek vara-Paleotseenis ja radieerus kiiresti peale teket; Ecl Leguminosae tek vara-Paleotseenis ja kes CE, Matos AB, Wojciechowski MF. 2004. Metacommunity process rather than continental tectonic history better explains geograph Fabaceae s.l. Kontinentidevahelised metsad selgitab taimede fülogeneesi ja endemismi. In: ? arv. L-Am kuivad kooslused on olnud püsivad u 10 MA, mitte efemeersed, sest Coursetia liigid on jõudnud suure genetilise mitmekesisuse. Mol. Phyl. Evol. 44: 778-789.

berales. Acta Mycol. 26: 7-75.

Pezizales maasiseste Vkedega liikide levik Euroopas

te viljakadega seente mitmekesisus enamuses Eur maades v vähe uuritud, mistõttu on ka puudulik kaitsekorraldus. Lihtsalt pole teada harulduse põhjused, kas nt leuef. ? related chipya vegetation types of northeastern Rhodesia. J. Zambia Marqusia mets v piiratud aladel ja väga tundlik raele. Areneb võsamedes chipyaks ja v raskelt taastatakse. 66: 175-198. rohumaal taimkate võimaldab areneda Uapacal, n rohumaal taimkate võimaldab areneda Uapacal, mis omakorda soodustab Brachystega, Julbenardia ja Marqusia, Cryptococcus, kottseened. Kult vs otse PCR+klon andsid eritulemused

son T, Tunlid A. 2004. Divergence in gene expression related to variation in host specificity of an ectomycorrhizal fungus. Mol. Ecol. 13: 3809–3819.

me of the ectomycorrhizal fungus Paxillus involutus. Fung. Gen. Biol. 36: 234-241.

power and influence: the role of mycorrhizal mycelium in controlling plant communities and agroecosystem functioning. Can. J. Bot. 82: 1016–1045.

); Ecological saprotroofid vs ECMseened: roll looduses, enstümid, konkurents, ülevaade

ies of carbon flux to ectomycorrhizal mycelium following 14C pulse labeling of Pinus sylvestris seedlings: effects of litter patches and interactions with a wood-decomposer. 2008. Biological weathering in soil: the role of symbiotic root-associated fungi biosensing minerals and directing photosynthate energy into grain-scale mineral weathering.

and development of the myco-heterotroph Monotropa hypopitys in nature and its requirement for locally distributed Tricholoma spp. New Phytol. 163: 405–423.

Res. 94: 993-995.

ytol. 127: 171-180. mükoheterotroofid: ülevaade kõigist aspektidest

zal and arbuscular mycorrhizal fungi. Curr. Opin. Plant Biol. 7: 422–428.

and New Zealand species related to Russula. Mycologia 94: 327-354.

les) in Australia. Aust. Syst. Bot. 22: 39-55.

Orihara gen. nov. (Boletaceae) from Australasia and Japan: new species and new combinations. Fung. Div. 52: 49–71.

cies of Russula (Russulaceae, Basidiomycota). Aust. Syst. Bot. 20: 355–381.

t long-sistance suill-rhizop

e copy number: absolute and relative quantification assays with Escherichia coli rDNA geeni koopiaste arvu rDNA geeni koopiaste arvu määramine RT-PCR abil. Evaluation of arbuscular mycorrhizal fungi. FEMS Microbiol. Ecol. 65: 339-349.

mongolica Koreas: domin Boletaceae, Amanita, Russula/Lact. Coltricia cinnamomea peetakse saproobiks

usted granite: textural controls on organic–mineral interactions and deposition of silica-rich layers. Chem. Geol. 161: 385–397.

In: Innis MA, Gelfand DH. (eds). PCR Protocols: A Guide to Methods and Applications. Academic Press: ???; DNA eraldamine SDS+Tris+merkaptotet-kloroformfenool-? prosula Russula, jt

2. Population Intsia: seemned langevad võra alla, putuktolmlemine, suured viljad. Nagu enamuse troopika puid, populatsioonid väheerinevad, pop sees suur varieeruvus

nutrient additions and ectomycorrhizal infection. Plant Soil 163: 299-306.

la sp, Scleroderma sp; tugev suksessiooniline muster 1-7 kuu; liigirikkus suurem, kus vanu peremeestaimi tihedamalt

ulation of two dipterocarpaceae species with locally isolated fungus in Peninsular Malaysia. J. Trop. For. Sci. 20: 237-247.

alaysian dipterocarpaceae seedlings. J. Trop. For. Sci. 22: 355-363.

adiumi seemned malaisias: Russula alboareolata, R. Virescens, Boletus aureomycelinus, Scleroderma sinnamariense -kasvad raielankidel

Pasoh dipterokarbid: domin Russula+Lactarius, Boletaceae, Amanita, Russ ja Amanita viljuvad üksteist välistavalt. Pms viljumisper märts ning aug-sept. Lisaks 10 liiki m

ew of Dipterocarpaceae: Taxonomy, Ecology and Silviculture. Pp. 100-114.

ches for detecting complex multivariate relationships in the spatial analysis of genetic data. Mol. Ecol. Res. 10: 831-844.

ation of species data. Oecologia 129: 271-280.

ity in a subtropical broad-leaved forest of China. Ecology 90: 663-674.

ple regression and canonical analysis. J. Plant Ecol. 1: 3-8.

a spp; vs risomorfide diversiteet

rrhizal fungi. Scand. J. For. Res. 7: 177-182.

arating the roles of environmental filters and historical biogeography. Ecol. Lett. 13: 1290-1299.

restrictions and dispersal in the composition of arbuscular mycorrhizal fungal communities. J. Ecol. 95: 95-105.

1 SJ, Rosendahl S. 2012. 454-sequencing reveals stochastic local reassembly and high disturbance tolerance within arbuscular mycorrhizal fungal communities. J. Ecol. 100

icient solution for the problem of large phylogeny estimation. Proc. Natl. Acad. Sci. 99: 10516–10521.

:- and intraspecific variability in the main species of Boletus edulis by ITS analysis. FEMS Microbiol. Lett. 243: 411-416.

from the middle Eocene. Am. J. Bot. 84: 410-412.

based on fossil and extant representatives. Acta Hort. 615: 29-30. Männiliste levik nüüd ja vanasti. Pseudolarix teada Mongooliast hilis-Juuras 156 MAT. See lükkab Wang t

a split-root system of arbuscular mycorrhizal plants is fungal and plant species dependent. New Phytol. 157: 589–595.

elie der van D. 2008. Elevated atmospheric CO2 affects soil microbial diversity associated with trembling aspen. Environmental Microbiology 10: 926-941.

ane, koosluse struktuur veidi erinev

lerma, Paxillus

villei; ülejäänud 5 kõi Pezizales

ry: Wilcoxina

size, mismatch position and number on hybridization in DNA oligonucleotide microarrays. J. Microbiol. Meth. 57: 269–278 Bac thuringensis Cry1Aa1 geen: eripikkusega and cons of synthetic stands and across-site comparisons in established forests. Basic Appl. Ecol. 10: 1-9.

nd genomic exploration. Fung. Div. 50: 35-46.

291.

rrhizal inoculation. QQQ 42-47

liigitekke mehhanismid: saartel suurem ökoloogiline võimalus, sama ka suure häiringu korral mujal. Poliüpl

Pauls P, Swanton CJ, Trevors JT, Dunfield KE. 2007. Cycling of extracellular DNA in the soil environment. *Soil DNA mullas: bakterite poolne lagundamine, transf* populations of the *Pleurotus eryngii* complex in Israel. *Mycol. Res.* 105: 941-951. **RAPD: 1 praimer, praimerite valik** populatsioo Popene, sas, statistica erinevate fülogeneesi moodulite võr

strategy for some hemiparasitic species of *Pedicularis* (Orobanchaceae). *Mycorrhiza* 18: 429-436.

**Hiinas Pedicularis liigid 90% AM**

Douglas-fir tuberculate ectomycorrhizae. *Plant Soil* 140: 35-40.

Alba and their infiltration into a residence. *Mycol. Res.* 109: 123. **Amanita muscaria** eoste levik: aja jooksul eoste suurus vähenes; eoste eraldumine max pära ark septate endophytes in a grassland site in southwest China. *FEMS Microbiol. Ecol.* 54: 367-373.

relationships in Fagales based on DNA sequences from three genomes. *Int. J. Plant Sci.* 165: 311-324.

**Fagales: Nothofag** (((Fagaceae

molecular and morphological evidence. *Fung. Div.* 49: 125-143.

siflora (Japanese red pine) by microsatellite polymorphism. *Heredity* 88: 88-98. **RAPD männile tolmeldajate leidmiseks.**

ment of microsatellite markers in polyploid *Salix reinii*. *Mol. Ecol. Notes* 1: 160. **RAPD, SCAR markerid pajule**

Tomentella sp, Cort sp; ringis Tr matsutake ja 3 liiki <1%; ringist väljas: Russ sp, Rhiz sp, Cort sp, Sistotrema sp; Huvitavatest Coltricia sp. Klaadidest domin Thel (8), Co arkers using amplified fragments of inter-simple sequence repeat (ISSR). *J. Plant. RAPD, ISSR genereerimine*

**d kontsentreerunud** 2-3 m kaugusel viljakehadest

analysis tool. *Plant Ecol.* 188: 117-131.

**MRM - partial Mant**

2010. C and N stable isotope signatures reveal constraints to nutritional modes in orchids from the Mediterranean and Macaronesia. *Am. J. Bot.* 97: 903-912.

gain through ectomycorrhizas in the ghost orchid *Epipogium aphyllum* Swartz. *Plant Biol.* In press.

l zone. *Env. Exp. Biol.* 10: 35-40.

From extensive clone libraries to comprehensive DNA arrays for the efficient and **OrM: parim ITSOF-ITS4, ent soovit l OrM seentele** Tulasnellaceae rühmast parenhüümi gametofüütil, sarnased struktuurid orhidoitse mükoorisaga

**Kanabala mükulaarne MR ja DSE, kahest kohast leiti Cenococcum, mille ristlõik v sarn okaspuudele**

sis. 6.3.

nt communitie **mida rohkem investeeritakse juurtesse, seda suurem liigirikkus** (vastupidi ???) juurte ja taime üldbiomass valitseb rametite arvuga küürselg-kõver

E jr **mikrolüüjalgsete BD mõjutab taime kasvu vähesel määral, suurem DGGG (Pennanen 2001 meetod), PLFA**

ited Scots pine and Norway spruce seedlings. *For. Path.* 30: 109-115.

ls of water-loss rates of epigeous ectomycorrhizal fungal sporocarps during summer drought. *New Phytol.* 182: 483-494.

st stand-level spatial structure in ectomycorrhizal fungal commu **ECM seente ruumiline autokorrel: olematu alates 8 m. Eri liikidele erinev. Biomass Mantel test: ECM seent**

fungi of contrasting life history strategies are mediated by addition of organic nutrient patches. *New Phytol.* 159: 141-151.

us, Tomentella **Tom subilicina: eosed levivad paljute mullaselgrootute seeditraktis ja kitiinkest. Võimalik levimiskaugus. Eosed vitaalsed peale esimest seeditraktis läbi**

**N-gradient: kõrge N> ECM BD väiksem. VK korrel tugevasti ECM andmetega, N 3 RE; sekv ITS (ITS1F/4), mchITS (ML5/6)-osadele morfofüütidelle**

**N saastudes. Eriti tundlikud Cortinarius, Lactarius, Russula, Hebeloma, Tricholoma. N taluvad Lact theiogalus, Laccaria, Pax, Hygroph olivaceo-albus. Koosluse koosseis r**

response to ni **ECM seente 13C korreleerub seente N-ühendite** kasutusega. **Mida mineraal-N rikkamal pinnasel kasvab seen, seda jõuetum on ta kasutama valke ja aminoh**

: exploring the linkages between functional and taxonomic responses to anthropogenic N deposition. *Fung. Ecol.* 4: 174-183.

rhizal fungal community-environment relationships? *New Phytol.* 174: 250-256. **ECM seente koosluste u**

fungi of contrasting life history strategies are mediated by addition of organic nutrient patches. *New Phytol.* 159: 141-151.

nd abundance of microsatellites in 14 fungal genomes. *Fung. Genet. Biol.* 41: 1025-1036.

õhjal: Thuja ja Tsuga lisandumine kooslusse muudab struktuuri

P and 33P between wood blocks connected by mycelial cords of *Hypholoma fasciculare*. *New Phytol.* 150: 189-194.

rhizal fungal communities. In: Dighton J, White JF, Oudemans P, eds. *The Fungal Community. Its Organization and Role in the Ecosystem.* CRC Press, Boca R **ECM seen**

secondary colonization of wood by basidiomycetous fungi. *New Phytol.* 169: 389-397. **saproobse**

arasmus, Cantharellales, sambalakõdust ja allpool Capronia, Thelephorales, Helotiales, Umbelopsis (endof Zygomycota), Archaeorhizomycetes

reactions and 32P between saprotrophic and an ectomycorrhizal fungus in soil microcosms. *FEMS Microbiol. Ecol.* 1287: 1-10.

cting mycelia of a wood-decomposing fungus and ectomycorrhizal fungi in microcosm systems. *New Phytol.* 144: 183-193

cycling in boreal forests -towards a less phytocentric perspective. *Plant Soil* 242: 123-135.

posers, yet not **ECM seened lagundavad teatud määral orgaanilist ainet, ent N ja P kättesaamise eesmärgil. Neid ei saa saproobideks pidada. ECM se**

16 - 387

enduvad Helotialestega, samas bakterite hõimk tasemel rühmad samad

J, Pennanen T, Rosendahl S, Stenlid J, Kausarud H. 2013. Fungal community analysis by high-throughput sequencing of amplified markers - a user's guide. *New Phytol.* 15

nes in ectomycorrhizal basidiomycetes. *New Phytol.* 164: 193-199. **kitinaasi**

. *Soc. Lond. B* 359: 1623-1632.

**Kapimaa floora** on eristunud <5 MAT kui kliima muutus kuivemaks. **Restionaceae** Kapimaa al 40 MAT

ogeogr. 28: 169-182.

**Aafrikas: suurima taime liigirikusega** alad Kamerun-Gabon, Dar-Es-Salaam-kuni Keenia; Põhja-Sambia

The Complete External Transcribed Spacer of 18S-26S rDNA: Amplification and ETS1F primer

fungal ITS sequences from *Picea glauca* roots. *Mycologia* 101: 157-165.

res phylogenetic relationships and inflates estimates of operational taxonomic units in genus *Laetiporus*. *Mycol. Laetiporus* kultuurisene ITS varieeruvus enamast

dl R, Delzon S, Corona P, Kolström M, Lexer MJ, Marchetti M. 2010. Climate change impacts, adaptive capacity, and vulnerability of European forest ecosystems. *For. E*

chung. *Bot. Not.* 315-355.

phic and yeast-like fungal pathogens using specific DNA probes. *J. Clin. Microbiol.* 39: 3505-3511. **pärmseenpatogeenide hindamiseks ITS rDNA**

l macroalgae. *J. Biogeogr.* 28: 243-251. **makrovetikate levik** Põhja-jäämerest Vaiksesse ja Atlandi ookeani ning vastupidi. Väinade ühendused, hoo

ligonucleotide arrays. *Nature Genet.* 21: 20-24. **ARRAY** metoodika, analüüs: ülevaade, pildid

of amino acid nitrogen to the alpine sedge *Kobresia myosuroides*. *New Phytol.* 142: 163-167.

udel ja suvel. Ajaline mitterepl. Kogu-DNA hübridisatsiooni põhjal ning funktsionaalsete assayde põhjal: talvel suht rohkem seeni, parem tselluloosi ja vanilli lagund. Suvel

*Alnus viridis* are strongly influenced by host species identity. *Int. J. Plant Sci.* 172: 403-410.

beyond Mantel: bringing procrustes association metric to the plant and soil ecologist's toolbox. *PLoS ONE* 9: e101238.

**Procrustes ja Partial**

is (Pinaceae) based on nuclear ribosomal DNA Internal Transcribed Spacer region sequences. *Mol. Phyl. Evol.* 11: 95-109. **Pinus -mänd: ITS 3000 bp: 2 erialan**

nish BA, West MA, Black MND, Tester PA. 2007. Recognizing dinoflagellate s **dinoflagellaatidele** sobib p **dinoflagellaatidele** sobib paremini triipkoodistami:

nd terrestrial e **Invasiivsed mittepatogeensed mmikroobid Invasiivsed mittepatogeensed mmikroobid: ülevaade (seente osa v vilets)**

and terrestrial ecosystems. Ecol. Lett. 13: 1560-1572.

Population genomics of domestic and wild yeasts. Nature 458: 337-341.

SaccharoM cerevisiae - inimic

Change Biol. 13: 2089-2109.

l endophytes isolated from Woollisia pungens. New Phytol. 140: 145-153.

Woollisia pungens erikoidse mükoriisa seened RAPD

ir role in orchid conservation in China - a review. Bot. Rev. 76: 241-262.

A polymerase II phylogeny. Proc. Natl. Acad. Sci. 101: 4507-4512.

kottseened: RPB2: Helotiales sõsarr

ge-scale coestimation of sequence alignments and phylogenetic trees. Science 324: 1561-1564.

SATE' - proge mis võimaldab iteratiivselt paranda

onomic classification of fungal large-subunit rRNA genes. Appl. Environ. Microbiol. 78: 1523-1533.

ochip for microbial identification studies: a non-equilibrium dissociation approach. Environ. Microbiol. 3: 619-626.

in vitro trans: in vitro transkribeeritud 16S rRNA; 30 20-nu

nce for a phylogenetic analysis of the monophyly of Taphrinomycotina, including Schizosaccharomyces fission yeasts. Mol. Biol. Evol. 16: 1799-1808.

fülogenoomika ESTde põhjal: 1

vidence from an RNA polymerase II subunit. Mol. Biol. Evol. 16: 1799-1808.

RNA pol II, kottseened, aminohapped RNA pol II, kottseened, aminohapp

ennost, Moscow. 217 p.

orrhizal Fungi: Key Genera in Profile. pp. 187 - 309. Springer, Berlin.

orrhizal symbiont Cenococcum geophilum Fr. and other mycorrhizal fungi amo. Mycol. Res. 108: 772-780.

18S Kottseened, sh kõik suuremad ECM

orrhizal fungus Cenococcum geophilum Fr. Mycologia 94: 772-780.

PCR-SCCP 9 lookusele; spets Cenococconi praimerid geneetiine

lomycorrhizal seedlings of Pinus resinosa on iron tailings. Can. J. Bot. 66: 55-60.

ishing: Oxford, UK.

### AM vs ECM

paju ja Populus deltoides: Looduses EcM domin mooduka niiskuse juures, AM domin kuivemates ja niiskemates, ent väldib ka äärmusi. Eksperim

Puerto Rico EcM taimed on Pisonia subcordata, Coccoloba swartzii, C. Pyrifolia, mis mood kõik transfer-rakkudega HN; lisaks teada C. Uvifera ja arv. Neea buxifolia

ER site. <http://luq.lternet.edu/data/lterdb86/metadata/lterdb86.htm>

iates, Inc. Sunderland, Massachusetts, USA.

Dipterocarpaceae from the Neotropics. I. Introduction, taxonom. Pseudomonotes tropenbosii levinud Colombias mõnes kasvukohas 200-300 müm terra firmal, 3000mm sad

inktsioonidega Haruldaste liikide rühmit liigirikkuise ekstrapoleer

masoonias: eri metsatüüpides; Pseudomonotese metsas Russ, Lact, Bol,

J, Johnson KB, Rodriguez RJ, Dickman MB, Ciuffetti LM. 2001. Green fluorescent protein is lighting up fungal biology. Appl. Environ. Microbiol. 67: 1987-1994.

iversity using terminal restriction fragment (TRF) pattern analysis: comparison of 16S rDNA-RFLP metoodika, arvutibioloogia uute praimerite disainimisel ja restriktasidde määramis

ty experiments biodiversiteedikatsete analüüs: var jagamine sampling efektiks ja komplementaarsuse efektiks. Sobib vaid katsetele, kus on ka monok

ty experiments taimede liigirikkus suurendab koosluse biomassi võtters arvesse iga liigi panust polükultuuris vs monokultuuris taimede liigirikkus s

ent knowledge taimede mitmekesisus vs funktsioon: ylevaade. Üksikud dominandid võivad anda vale ettekujutuse koosluse liigirikkest

a prob = sampling eff - tihti tugev kattuvad; taastumine häiringust. teoreetiline tagapõhi. Originaalidecc

p.) with ectomycorrhizal fungi on mined boreal peatland. Plant Soil 116: 229-238.

4-1354. ökomorfoloogiline fülogenees ökomorfoloogiline fülogenees: probl

onship between phylogenetic niche conservatism and diversification: evidence from a phylogenetic analysis of plant communities

gematel juureostel, õhukese mantli ja tugeva rakusise kolonis-ga, HN hästi arenenud

Singapur rand: mida suurem oli taimede katvus ja vanem ranna ala, seda rohkem oli AM taimi. Scaveola (Goodeniaceae), Casuarina equisetifolia

plocystis wrightii in the Sclerodermatales (Boletales) based on nuclear ribosomal large subunit DNA sequences. Mycoscience 48: 66-69.

and ecosystem AM diversiteet suurem seal kus suurem taimede primaarprod, ent kooslus v erinev. AM koosluse ühtlus suurendas P summaarset ülevõttu. AM kooslused t

altitudinal gradient in the Eastern Arc mountains of Tanzania. J. Trop. Ecol. 12: 629-650.

Tansaania Udzungwa mägedes puude BD suurim u 1500 m peal. Arv mägede ülemise võtme puudumise t

y in the Eastern Arc mountains of Tanzania. J. Trop. Ecol. 12: 629-650.

SSCP, sekv dominandid 18S (1900 bp) TU indeks BD jaoks

..

2002. Oligonucleotide microarray for 16S rRNA gene-based detection of all recognized lineages of sulfate-reducing bacteria. Science 320: 1632-1635.

16S rDNA: 16S rDNA: 132 probe 18nu, erinevatele bakte

sequence alignment and evolutionary analysis. Science 320: 1632-1635.

icrobial communities. Appl. Environ. Microbiol. 71: 8228-8235.

mikroobide fülogeneetilise koosluse

ective distance metric for microbial community comparison. ISME J. 5: 169-172.

Unifrac sõltub sekve

ight R. 2008. The convergence of carbohydrate active gene repertoires in human gut microbes. Proc. Natl. Acad. Sci. 105: 15076-15081.

mittealigneeritavate geenide võ

β diversity measures lead to different insights into factors that structure microbial communities. Environ. Microbiol. 73: 1576-1585.

UNIFRAC-kaalutud stati

icrobial community diversity in a phylogenetic context. BMC Bioinformatics 7: 1-14.

UNIFRAC-online anali

id. Sci. USA 104: 11436-11440.

Vaja rohkem metaandmeid UNIFRAC analüüsideks

al diversity. FEMS Microbiol. Rev. 32: 557-578.

fülogeneetiine statis

ps of endophytic Colletotrichum isolates from the Iwokrama Forest Reserve, Guyana. Mycol. Res. 108: 53-63.

us globulus istandikes W AUS ja üle maakera: Auss domin Cortinariaceae ja Russulaceae. Laccaria ja Sclerodermataceae ka v noortes istandikes. Maailmas pms perek Arr

lobulus seedlings inoculated with spores of various ectomycorrhizal fungi. Mycorrhiza 8: 81-86.

I.W. Chase MW, Wilson PG. 2005. Phylogenetic patterns in the fleshy-fruited Myrtales - preliminary molecular evidence. Plant Sys Myrtales: Leptospermum ja Eucaly

: activity following simulated atmospheric N deposition. Soil Biol. Biochem. 40: 1662-1669.

### Pyrola perek seemnete idanevus eri tingimustes

ial response of ectomycorrhizal and saprotrophic fungal mycelium from coniferous forest soils to selected monoterpenes. Soil Biol. Biochem. 40: 669-678.

ctic ecosystems. Soil Biol. Biochem. 40: 11-29.

ilaceae, ülal seejärel saproMycena spp, Boletaceae spp

ntides: suurim O-horis: seal pms saproobide oma, min-mullas pms ECM seente sl kandseente lakaasi geenide diversiteet mulla eri horis taks: Ruhlandiella, Sphae: lakaasi ge

olonization of root systems of three Populus species grown under elevated CO<sub>2</sub> (POPFACE). Glob. Change Biol. 9: 838-848.

geography of fungi. Mycol. Res. 112: 423-424.

mikro- ja makrosentel on väga konkreetsed biogeo muistriid

nal phylogenetic relationships of Lecanoromycetes based on a Bayesian analysis nuLSU, mtSSU Lecanoromycetes on monofüleet, se

mycota -2007. Myconet 13: 1-58.

kottseente taksonoomia klassid

seudotsuga menziesii seedling roots and monokaryotic and dikaryotic isolates of Laccaria bicolor. Mycorrhiza 5: 237-244.

y J, Engelbrektsson A, Kunin V, del Rio TG, Edgar RC, Eickhorst T, Ley RE, Hugenholtz P, Tringe SG, Dangl JL. 2012. Defining the Rarefiteerimine vs mitte annal

innovations for high-throughput amplicon sequencing. Nature Meth. 10: 999–1002.

and nutrient uptake in oak seedlings inoculated with selected ectomycorrhizal fungi. Restor. Ecol. 11: 125–130.

ste vk seentel NW-Am ebaasuuga metsas: kokku 0.59 ha 4 aasta jooksul: 47 liiki; biomass 1.3 kg ha-1. 5 metsatüüpi uuriti (n=2). Eri liikidel tugev eelistus mingite kasvukohadele, kuid peaaegu kõik liigid olid suurem kui võra alt väljas

Chondrogaster angustisporus k

/sorr, Russ vesca, Tricholoma albobrunn obs tammedel + ILLUSTR: Arcangeliella asterosperma obs tammel (EcM ei klapi Russulaceae-ga)

Pseudaleuria gen nov: saproobri

Idas LS, Ziegler, puuvoorikutel sama intens fotosynt kui peremeestaimedel. Puuvoorikutel kauem ohulohede avatud, madalam lehetemp ja korgem rakusis CO2 rohk

Seentel. 4 geeni. Kottseentel Taphri

progress, classification, and evolution of subcellular traits. Am. J. Bot. 91: 1446-1480.

mbiotic ancestors. Nature 411: 937-940.

evolutsioon kiireneb lihenis vs mitt

mutualism. Proc. Natl. Acad. Sci. 94: 11422-11427.

multi-regressioon: ta

328-341.

aeae; Pneumatospora (Canth); cf Volvariella; Ceratobasidiaceae; Coprinus; SSU-ITS-LSU kandseente-spets praimerid -andsid ca 4.6% muid seeni

d with early decaying leaves of Spartina spp. from central California estuaries. Oecologia 162: 435-442.

ion resistance. mida suurem BD, seda raskem invasiivsel raiealal (Lolium multiflorum) kanda kinnitada, samas kui biomass ei avalda mingit vastunõju

acid irrigation on enzyme activities of the single partners of ectomycorrhizas from a limed stand of Norway spruce (Picea abies [L.] Karst.). Plant Soil 199: 71-8 Glc6P DI

Dufresne M, Freitag M, Grabherr M, Henrissat B et al. 2010. Comparative genomics reveals mobile pathogenicity chromosomes in Fusarium. Nature 464: 367-373.

hiza isolates from tropical orchids. Mycol. Res. 107: 1041-1049.

orhideedel Sebacia-Epulothiza ITS1-ITS4 kultuuris orhideedel Sebacia-Epulothiza ITS

ic black truffle (Tuber indicum) in commercialized products: fruiting bodies and PCR produkt liikide eristamiseks; sekv Tuber sp ITS

rRNA for stable isotopic characterization. Environ. Microbiol. 4: 451-464.

13C eriliikid 13C eriliikide 16S rRNA valikuline puhastam

LV. 2008. Fungal root endophytes from natural vegetation in Mediterranean environments with special reference to Fusarium spp. FEMS Microbiol. Ecol. 64: 90-105.

analysis. Evolution 62: 1103-1118.

rid, Flexibakter-grupp, aktinobakterid

18S rDNA

ty of bacterial and archaeal communities in the anoxic zone of the Cariaco Basin. 16S rDNA

täpne ja põhjalik ülevaade JPN taimede mükoriisusest. EcM: Abies, Cedrus, Larix, Picea, Pseudotsuga, Tsuga, Pinus, Alnus, Betula, Carpinus, Cor

112. Plant spec liigirikkus taimedel kuivadel aladel suurendab otseselt ökosüsti multifunktsionaalsust (eri mullaühendite rohkust)

M, Kitamoto Y, Aimi T. 2008. Rapid Species Identification of Cooked Poisonous keeduetud jm töödeldud seentest DNA eraldamine ja PCR liigispets-praimerid

Pakaraima dipterocarpaceae: Guyana ja Venezuela savannides Pakaraima dipterocarpaceae: Guyana ja Venezuela savannides üksikutel aladel. Kindlasti on vikariantne, nr

Press, Princeton, N.J.

species abundance haruldaste liikide suure osakaalu põhjused -log jaotus; dominantidel log-norm jaotus. Nende kattudes tekib negatiivne skew

scr. Ectomyce. 4: 61-65.

eloma; Lageriaie + looduslik uuendus: Thelephora, Amphinema, Wilcoxina; Lageriaie 3 RE, põhjalik protokoll kirje RFLP lahutus vs morfotüüpiseerim PHI jt indeksid, Bonferr

2012. PHYMYCO-DB: A curated database for analyses of fungal diversity and e PHYMYCO-DB: andmebaas SSU ja fülogeneesis kasutatud geenidele

ar mycorrhizal fungal communities. PLoS One 7: e36695.

embly and ecosystem functioning. Science 316: 1746-1748.

eiogalus

3 RE

x

ood ash on microbial activity, plant growth and nutrient uptake by ectomycorrhizal spruce seedlings. FEMS Microbiol. Ecol. 43: 121-131.

fibrillosa; 3 t tuhka/ha: Unkn1, Tylospora fibrillosa, Piloderma1, Piloderma falla: 3 RE + tarkvara, andmebaas

fungi in wood ash amended substrates. FEMS Microbiol. Lett. 221: 81-87.

kottseened kui ECM moodustajad: Pezizales ja Elaphomyces kui EcM moodustajad: kõigi autori töödest ülevaade, v palju kontrollimatut jama

in an organism with endosymbionts: microsatellites in the scleractinian coral Seriphaea hillebrandii RAPD, SCAR markerid sümbi RAPD, SCAR markerid sümbiontile korallile. vaja sümbi

ytic and proteolytic activity in ectomycorrhizal fungi and Heterobasidium annosum. New Phytol. 117: 643-648.

proteaaasid

, Kew Bull. 1: 1-19.

ig on forest str Kongo Ituri: prim metsas rohkem >10cm dbh puuliike nii ala kui indiv kohta vrd sekund-metsaga. Sek-metsas eriti vähe Gilbertiodendroni ja Julbernardiadi, nr

ace of six African timber species. Biotropica 37: 227-237.

III. Superficial ectomycorrhizas initiated by Hysterangium and Cortinari species. New Phytol. 105: 421-428.

tlets of Eucalyptus camaldulensis with ectomycorrhizal fungi, and comparison with seedling inoculation using inoculum contained in a peat/vermiculite carrier. Aust. For. J

ajast. MR tüübid levinud eri horisontides.

mycorrhizal and uninfected seedlings of Eucalyptus calophylla. Aust. J. Bot. 23: 231-238.

. II. The ultrastructure of compatible and incompatible mycorrhizal fungi and associated roots. New Phytol. 96: 43-53.

Tüüp4 meenutab väga Meliniomyces bicolorit

Orthilia secunda: ErM ja Arbut MR; Rosa, Rubus NM; Alnus, Cetula, Populus balsamifera EcM ja AM; Corylus ja Picea vaid EcM. Obs Cenococ

Cistaceae in North America. Can. J. Bot. 63: 872-875.

EcM evolutsioon: arv, et EcM c

cance of myco mükoriissed taimed kogu maailmas: ülevaade mükoriissed taimed kogu maailmas: ülevaade

(parem kuivemas)

urtel Scleroderma; cenococcum

ark septate endophytic fungi. Stud. Mycol. 53: 173-189.

ing, a novel means of linking microbial community function to phylogeny. Appl. RT-PCR bakteriteel, mille fenoolne substraat oli rikastatud 13C-ga; gradienttsentrifugim

ria, and Fungi During Leaf Decomposition in a Stream. Microb Ecol 56: 467-473.

er JD. 2010. Ni troopikapuudel negatiivne mullamikroobide tagasiside, mis arv suurendab BD.

Suillus ITS -suur liigisisene varieerub

interrelationships among common European Suillus species based on ribosomal ITS

id derivatives: kuuse eriligi hübriidid on väiksema fotosünteesivoimega kui molemad vanemliigid

cies Profiles for Pacific Island Agroforestry. Permanent Agriculture Resources (PAR), Hōlualoa, Hawaii. Available at: http://www.traditionaltree.org

molecular differentiation in Quercus subgenus Quercus (Fagaceae). Mol. Phyl. Evol. 12: 333-349.

tamm: Quercus alamperek Quercus:

he tertiary history of temperate and subtropical forests of the Neogene Fagaceae: tertsiararis või varem olid kõik perek olemas nii Eur, N-Am kui Aasias. Fagus tek arv Kaug-Idas



tification of a laccase gene family in the new lignin-degrading Basidiomycete CE **SB, NB, lakaasi geenidele** ja transkriptidele: väh 5 geeni (Trametes) **Trametes**  
e gene family from Basidiomycete I-62 (CECT 20197). Appl. Environ. Microbiol. 64: 771–774. **Trametes**

R-based estimates of soil microbial richness and community structure. Appl. Environ. Microbiol. 76: 2086-2096 proovide poolimine vähendab üldise liigirikkuse t  
s to water stre **põuataluvus mullaorganismidel: seentel on** eeliseid kuivades tingimustes; mineraalmullas tundlikum madalate veepotentsiaalide suhtes, kuna lah  
onvergent evolution of arboreal life in oribatid mites indicates the primacy of ecology. Proc. R. Soc. B 276: 3219-3227. **Oribatida:** puudel elavad vormi

atid mites. Ecography 30: 209-216. **Oribatid mites** lestad globaalne liigirikkus: tipp temperaalsed metsad ja troopika: troopika  
**fusipes genetiid** **SI vs IGS1, IGS2 pikkus;** hästi ei klappinud; täpne amplifitseerimisprotokoll

DGGE 18S rRNA 1650 bp. Algul risof domin pleosporales, mitterisof Eurotia **DGGE 18S rRNA 1650 bp NS1-FR1.** DGGE bändi taga võib olla 5 eri seeneliiki (sekv  
cotton root rot pathogen, Phymatotrichopsis omnivora. Persoonia 22: 63-74. **Phymatotrichopsis omnivora o**

**NW-ITA: EcM taimed** Alnus glutinosa, Cistus spp, Arbutus (arbutoidne), Quercus spp, Pinus spp, Populus alba, Crataegus monogyna (ei illust.)  
strait. Nature 397: 149-151.

tican Nothofagus forests. In: In: Veblen TT, Hill RS, Read J (ed) **Nothofagus: tek** Antarktika ps-Satagoonia väh 83 MAT. Siis oli kooslustes koos Podocarpaceae, Protea  
itrogen fixation in an actinorhizal plant at the edge of its range. Botany 86: 398-407.

86: 501-510.  
creases carbon limitation in ectomycorrhizal symbiosis of *Betula pubescens*. Oecologia 140: 234–240.

**vs Ni; vs samblike eemaldamine; P. fallax ei talu** samblike eemaldamist, suiloid-tüüp eelistab kergelt niklisaastet  
ngal biomass in Scots pine stands on an urban pollution gradient. New Phytol. 131: 139-147.

03. Application of an rRNA probe matrix for rapid identification of bacteria and fungi from routine blood cultures. J. Clin. Microbiol. 40: 1003-1007.  
pecies richness: **niidu niitmine suurendab pms rohundite liigirikkust**

IX No1: 244 – 276 **xxx, isotsi**

phic? Oecologia **puuvoorik saab kadakast 61 protsenti oma süsinikust**  
. Recent introduction of a chytrid fungus endangers western palearctic salamanders. Science 346: 630-631.

ty of microbial communities. Appl. Environ. Microbiol. 68: 3673–3682.  
ribosomal DNA in Pisolithus isolates associated with pine, eucalyptus and Afzelia **Pisolithus IGS ja ITS** võrdsele variatsioonile

l *Pisolithus* species as inferred from nuclear ribosomal DNA **Pisolithus spp. C Pisolithus spp: ITS**  
**opmental cross talking in the ectomycorrhizal symbiosis: signals and communication genes.** New Phytol. 151: 145-154.

gord black truffle genome uncovers evolutionary origins and mechanisms of symbiosis. Nature 464: 1033-1038.  
hts. Curr. Opin. Plant Biol. 12: 508-515. **Laccaria**

he ectomycorrhizal basidiomycete Laccaria bicolor: structural analysis and allelic polymorphism. Microbiology **Laccaria bicolor/ samal** indiviidil 2 IGS2 alleeli, mis erinev  
is of the ITS region of environmental DNA extracts. BMC Microbiol. 5: 28. **praimerid seenespets** mullast amplif-ks ümber ITS regiooni ja 5.8S: sh 58SF

y between *Stephanospora caroticolor* and *Lindneria trachyspora*. Mycotaxon 90: 133-140. **Stephanospora ja Lindneria on**

phylla and Setchelliogaster tenuipes based on morphological and molecular data. Mycotaxon 71: 141-148. **Setchelliogaster** (puguseen) on tulene  
Robertson GP, Santos OC, Treseder K. 1999. Nitrogen stable isotope composition of leaves and soil: tropical versus temperate forests. Biogeochem. 46: 45-65.

x G. 2001. DNA extraction from soils: old bias for new microbial diversity analysis methods. Appl. Environ. Microbiol. 67: 338-344.  
l fungi from heavy metal polluted soils: their identification and growth in the presence of zinc ions. Mycol. Res. 104: 338-344.

**kahandavad** kõvasti metsade saagikust, er EcM seente viljumist. Cistuse plotid annavad mitmekesisemalt seente viljakahi kui männi plotid ja paljud liigid kattuvad. Männi  
losse M-A. 2009. Independent recruitment of saprobic fungi as mycorrhizal partners by tropical achlorophyllous orchids. New Phytol. 184: 668–681

f epiphytism in architecture and evolutionary constraint within mycorrhizal networks of tropical orchids. Mol. Ecol. 21: 5098–5109.  
tions of Thelephora terrestris and other ectomycorrhizal fungi of shortleaf pine seedlings grown in fumigated soil. Can. J. Bot. 48: 207-211.

ent and susceptibility of loblolly pine roots to ectomycorrhizal infection by *Pisolithus tinctorius*. Can. J. Bot. 55: 1569-1574.  
tomycorrhizae on pine seedlings using basidiospore-encapsulated seeds. For. Sci. 30: 897-907.

**Inoculum. In: ???**  
basidiospores of Thelephora terrestris. Can. J. Bot. 48: 197-198.

basidiospores of Thelephora terrestris. Can. J. Bot. 48: 197-198.  
**ic ectomycorrhizae on loblolly pine seedlings.** For. Sci. 27: 167-176.

itions. In: Hacskeylo E (ed. ). Mycorrhizae. USDA Forest Service: Washington USA. pp. 81-95. **ECM: bak**

ment and growth of inoculated Eucalyptus globulus seedlings in wet and dry conditions in the glasshouse. For. Ecol. Manage. 128: 269-277.  
gen and phosphorus on mycorrhizal development and shoot growth of Eucalyptus globulus seedlings inoculated with two different ectomycorrhizal fungi. For. Ecol. Manage  
d phosphorus concentration on mycorrhizal development and growth of Eucalyptus globulus seedlings inoculated with 10 different fungi. For. Ecol. Manage. 128: 249-258

**rs sookask** (väiksem kasvukiirus, vähem seeneliike); põhjapoolt toodud kase kloonid aegl kasvuga, vähemate viljakahadega  
read of sheathi **varajase vs hilise staadiumi seened: Hebeloma** eelistab tugevasti mineraalmulda turbale; **inokuleeritud varase st seened** võivad samuti asendada peale istutan  
mise faasist (kohe-ohem), mõnel juhul taime rakukestest tegi sissesopistisi.

of ectomycorrhiza formation in Alnus glutinosa and Pinus resinosa with Paxillus involutus. Mycorrhiza 8: 229-240.

usad, PILDID

l P-asarifolia; ülejäanutel üksikudel juuretippudel ja Amphinemat meenutaval morfotüübil

**peremehespetsiifika, selle liigisene, sektsioonisene ja perekonnisene varieeruvus, variatsioonimustrid, mõju taimedele**  
**eri peremeeste eelistused, juhuperemehed**

aponica: domin Cortinarius sp ja cf. Paxillus sp. Alnus firmal lisaks ka Cenococcum, mis võib olla valetade vale puu juurte põhjal

ccosus männil, "Hydnum" männil, Bankera männil, Scleroderma Castaneal VK viidi EcMga kokku

Lodge DJ, Soyong K, Trappe JM, Hibbett DS. 2009. Out of the palaeotropics? Historical biogeography and diversification in the cosmopolitan ectomycorrhizal mushroom  
forests of Guyana. Mycol. Res. 107: 495-505. **Inocybe Diemybe** all: mitmed liigid l

a (Inocybeaceae, Agaricales): molecular systematics, taxonomy & Auritella (Inocybe s.l.) Aafrikas ja Austraalias -kalibr Ida- ja Lääne Aauritella (Inocybe s.l.) Aafrikas ja A

les: a multilocus phylogenetic overview. Mycologia 98: 984-997. Euagarics klaad = Agaricales. Palju

; the phylogenetic position of the Wallemiomycetes: an enigmatic major lineage of Basidiomycota. Can. J. Bot. 84: 1794-1985. Wallemiomycetes on takson, mis eri

ve phylogenetic inference among mushrooms (Inocybe, Agaricales). Am. J. Bot. RPBII (RNA Pol II) + LSU Inocybe: RPBII (RNA Pol II) + LSU

l to the phylogeny of mushrooms and allies (Basidiomycota, Fungi). Mol. Phyl. Evol. 43: 430-451. kandseente süst: rpb2 hea, tefl kesk

l RPB2 nucleotide sequences (Inocybe; Agaricales). Mol. Phyl. Evol. 35: 1-20. Inocybe: uus sugukond Inocybeaceae

17. Effects of abiotic factors on the phylogenetic diversity of bacterial communities in acid thermal springs. Appl. Environ. Microbiol. 73: 2612-26; Paarikaupa Fii(st) vä

usus ectomycorrhizas on Momi fir by RFLP analysis of the PCR-amplified ITS region of the rDNA. J. For. Res. 4: 145-150.

a sp1; seemikutele seelajel Cenoc, vanadel puudel teised mitteidentif tüübid ITS-RFLP 2 RE

sessioon

cture and function. Biol. Chem. 387: 1535-1544. Leucine

and mixtures (Melampyrum) mõjutab peremeestaimede vah konkurentsi. Peremehe segude mõju parasitidele idiosynkraat. Voib soodustada korgemat lokaalset taimede dive

Malpighia 1: 359.

use and biodiversity. Trends Ecol. Evol. 20: 610-616.

pteroocarpaceae. In: Appanah S, Turnbull J, eds. A Review of Dipteroocarpaceae kogu maailmas. Fossilid Ida-Aafrikas, kahtlased fo: Dipteroocarpaceae kogu maailmas. F

. 110: 499-500.

In: Eucalypt Ecology: Individuals to Ecosystems. Williams J, W Austraalia seemed: taksonoomia probleemid Eur nimelega, Paljud see: Austraalia seemed: taksonoomia prof

beyond. Aust. Syst. Bot. 14: 329-356.

rofungi? Aust. Syst. Bot. 15: 501-511. Austraalia seente biogeograafia: W-AUS mitmeid endeeme perek-des Amanit, Torrendia, er maasis kandseened.

a for the year 2000. J. Biogeogr. 31: 861-877. Aafrika maakasutuse kaart: SLAIDID; LINGID; statistika

monodominant tropical forests of Guyana? New Phytol. 169: 579-588. arv, et Ec

fungi using stable isotopes. Ecol. Lett. 12: 171-183.

otope patterns in Alaskan black spruce reflect organic nitrogen sources and the activity of ectomycorrhizal fungi. Ecosystems 15: 819-831.

rhizal mycobionts under field conditions. Can. J. For. Res. 17: 859-864.

ts under field conditions. Can. J. Bot. 64: 848-852.

comment on distance-based redundancy analysis. Ecology 82: 290-297. DISTLM, DISTLM for

naal: majandamata alal suurem BD, suurem liigirikkus, kollektorköber järsem. Sa bakterid 16S rDNA majandatud vs majandamata rohumaal: majandamata alal suurem BD,

community structure under different land management regimens by using 16S rDNA. DGGE: looduslik vs pollooduslik vs kultuurrohumaal: vahet p PCA -DGGE bändidele

012. Limitations on orchid recruitment: not a simple picture. Mol. Ecol. 21: 1511-1523.

r; Tipularia bicolor: Tulasnella spp; Liparis: Tulasnella 1sp; Goodyera pubescens: Tulasnellad saadi kätte ITS5/ITS4 või ITS1F/ITS4 p: fülogeneesiaal tot jura

bruns TD, Taylor DL. 2009. Abundance and distribution of Corallorhiza odontorhiza reflect variations in climate and ectomycorrhizae. Ecol. Monogr. 79: 619-635.

fungus fidelity: a marriage meant to last? Ecology 87: 903-911.

MjM Software, Gleneden Beach, Oregon, USA.

Version 5.04. MjM Software, Gleneden Beach, Oregon, U.S.A. PC-Ord 5.04

Rocky Mountains Pseudotsuga, Pinus murrayana, Abies, Picea, Populus tremuloides mood EcM; Juniperus, Cercocarpus 3 spp ja Pinus monophyl

Illinois: Populus deltoides, Carya cordiformis, Carpinus sp, Quercus spp, Tilia am mood ECM, Juglans, Crataegus, Prunus, Carya laciniata mood ,

Michigan: Tilia, Carya, Quercus, Larix mood EcM, illustreeritud!

North Carolina: Castanea dentata, Betula lutea, Magnolia spp, Quercus velutina, Carya glabra, Abies balsamea, Picea, Tsuga, Pinus mood EcM. Ill

ics. Trends Ecol. Evol. 21: 157-164. L-Am suurimetajate paleontoloogia ja biogeograafia uusaegkonnas, ulatuslikud kliimamuutused ja levik

mi pine (Wollemia nobilis) and related Araucariaceae. Aust. J. Araucariaceae VAM

Ceratopetalum apetalum: VAM ja 1-rakukihise mantliga ilma HN-ta EcM. EcM-ga rakud elavad kauem kui ilma. Ceratopetalumi seemed ei mood EcM muudel puudel.

Further Australian sporocarpic Glomaceae. Aust. Syst. Bot. 15: 115-124. Glomus spp, mis mood viljakehi ja /

Austraalia poolkõrbe EcM taimed: Thysanotus (Asphodelaceae), Helichrysum, Podolepis, Toxanthus (Asteraceae: Inuleae), Astroloma (Epacrid), Poranthera (Euphorb.)G

Thysanotus (monokott) väidetavalt ECM, kuigi ECM struktuur pole peale rakkudevah kolonis, juurte vohamise ja kogu kasvu stimulu. [Arv auksiinid]

Thysanotus mood v naljakaid struktuure AM ja EcM (Peziza whitei) seentega, mis mood vaid rakusisesed struktuure. Eriti Peziza parandas taimel

ra tubaeformis mood 1-2 rakukihise mantli Melaleuca uncinata. Võib mood viljakehi potikultuuris Densospora (Endogonaceae) -EcM s

unctional diversity in resource use by fungi. Ecology 91: 2324-2332.

de liigirikusest kõdus; kõdus ja mullas olid erinevad seenekooslused fülogeneetilised võin

L-Am Guyana L-Am Guyana puud enamasti AM, v.a. Aldina mood EcM ja Dicycme mood nii eCM kui Amv EcM+AM soodustab Dicycme levikut ja paremat minera

mposition is b monodominant metsas kõdulagunemine aeglasem kui AM-metsas GUY: lehtede päritolul polnud tähtsus; AM-metsas suurem mikroobne

nce in a tropic Dicycme monodominantsus: seemikute elumus suurem puude läheduses, kus on olemas EcM võrgustikud. EcM ja/või juurte kontakt parandab kasvu. Ka ee

ymbe corymbo Dicycme idanemine ei olene seemnete tihedusest. Dicycme jpt AM puud idanesid paremini Dicycme-rohketes metsades. Dicycme elumus palju suurem l a

a-sarn seeni. Vahet pole kas AM-taimed saeti maha v mitte

t of myco-heterotrophic plants in nature: transfer of carbon from ectomycorrhizal Salix repens and Betula pendula to the orchid Corallorhiza trifida through shared hyphal c

development of the myco-heterotrophic orchid plants in nature: ontogeny of Corallorhiza trifida and characterization of its mycorrhizal fungi. New Phytol. 145: 523-537.

emaa seente nimestik, sh. Coltriciella dependens, Theleporales

Mycologia 66:197-202.

zoic floristic provincialism. Aust. J. Bot. 49: 271-300. Gondwana lagunemine ja floristilised tsoonid

ja vähese Nothofagusega metsas; vs eri vanuses peale põlengut. EcM seentest Laccariasp ja Cort1 mõni a peale põlengut ja ka vanades metsades, vaid vanades Clavulina,

l.

547.

Lepa juured l Lepa juured lähevad nii horisontaali kui ka sügavale, mis varustab veega ka kuivaperioodil. Frankiad pms tüvede lähedal ja ei ulatu veepeiri alla

l. Alnus glutinosa kannatab palju paremini üleujutamist kui kask; ei kasva happelisel turvasel, kus ei mood ka aktinoriisa

Mediterranean Basin. J. Biogeogr. 36: 1333-1345. refuugiumid: Vahemere-äärsed märgised piirkonnad on täis. Pooled neist korral taimede BD

ta. Bull. Soc. Mycol. Fr. 121: 91-98. Sowerbylla liikide morf ja kas

us sõltub VK suurusest vaid mones perekonnas, teises poordvõrdeline

iations and toxic metal cations. Mycol. Res. 107: 1253–1265.

orgaanilis

ity, and below-**kõdulagunemine: kõdu segu efekt sõltub** kõdu keemilisest diversiteedist (S-W index), mitte taimeliikide diversiteedist. Keemiline BD

le

num conditions for pure culture of major ectomycorrhizal fungi obtained from *Pinus sylvestris* var: *mongolica* plantations in southeastern Keerqin sandy lands, China. J. F

arisk vähendab EcM ja AM seente kolonisatsiooni BD ja mõj EcMF koosluse struktuuri; neg efekt EcM seentele tugevam kasvuhoone-katses

unities indicates limited taxon sharing between studies and the presence of biogeographic patterns. New Phytol. 201: 623-635.

ir significance in respect to Phosphorus uptake. New Phytol. 68: 141-149.

vuseti (kus olid erinevad morfotüübid), ent sama aastaajati. Cenococcumi tüüp eriti 10-30 süg mullas. Teistel puuliikidel erinevused ka aastaajati. '

Euroopas, k.a. Cenoc

*abies* by two *Boletus* species on the accumulation of phosphorus. New Phytol. 74: 455-459.

**mükoriisast: mükoriisastaatus Tsehhi turvastunud metsades-rabades.** Puud norm EcM.

us Virginiana through mycorrhizal mycelium. Bot. Gaz. ???: 243-246.

(L.) karst. Svensk Bot. Tidskr. 15: 192-203.

hiza in reinkultur. Svensk Bot. Tidskr. 16: 161-196.

zen und Ihre Pilzsymbionten. Svensk Bot. Tidskr. 17: 479-519.

der Mykorrhizen von *Pinus sylvestris* L. und *Picea Abies* (L.) Karst. Mykol. Untersuch. Ber. 2: 73-331.

az der Wurzelpilze von Kiefer und Fichte. Bot. Not. 1924: 38-48.

ot. 4: 69-92.

is der pilzsymbionten. Svensk Bot. Tidskr. 19: 98-103.

. Handb. D. Biol. Arbeitsmeth. 11. 4.

zen, mit besonderer berücksichtigung der wurzelpilze von bäumne. Symb. Bot. Ups. 8.3: 3-117.

nsk Bot. Tidskr. 48: 86-94.

inatum and its relatedness to other black truffles. Environ. Microbiol. 4: 584–594.

**Tuber uncinatum** ja **Tuber aestivum**

ldanud

he detection of white truffles in ectomycorrhizal roots. New Phytol. 141: 511-516 **multiplex PCR: spets** praimerid **Tuber borchii**, **T. Magnatum**

al roots by PCR amplification of the ribosomal DNA spacers. Mycorrhiza 6: 417 **Tuber: ITS-RFLP** eriiliikide ja **Sphaerosporella** eristamiseks

ii versus *Tuber maculatum*: neotype studies and DNA analyses. Mycologia 92: 326-331.

**Tuber borchii** erineb **T maculatum**ist

lihtsate matemaatiliste funktsioonidega: 11 eri funktsiooni paljudele eri biol andmetele. Üldiselt parim LS meetod, järgn neg binoom, jackknife1, k **liigirikkuse** ekstrapoleer

ycorrhizae synthesized between dry as *Integrifolia* and *Hebeloma cylindrosporum*. Bot. Gaz. 148: 332-341.

tor visitation **Network-anal: võõrliigid nii mesilastel kui** ka taimedel on integr hästi kohalikku networki; võõrliikidel on on tavaliselt 1.2 korda vähe

gy. Trends Pl. Sci. ? : 1-5.

elustüvedes: erinevad, ent paiguti kattuvad *Phialocephala* liigid

**DSE -ITS -juuretip**udes, lagujuurtes, kändudes, elusjuurtes, elustüvedes: erinevad, ent p

ldamine parandab puude kasvu, ent inh EcM kolonis

ov. and a sequence-based classification of related soil fungal species. Fung. Ecol. 118: 943-945.

**Archaeorhizomyces borealis**. S

muudest *Neonectria*, *Phialoceph fortinii*, *Neonectria2*

, *Suillus lut*; kuusk *Amphinema*, *Hymenosce*, *Thel*; plastikpottides *Thel*, *Laccaria* eripuudel. Liikidest männil 52% **ITS liigisisene** var <2 %; perekonnasisene var 90-97%

; *Mä -Suillus luteus*, *Rhizopogon spp*, *Thel terr*

ities in mycorrhizal roots of conifer seedlings in forest nurseries under different cultivation systems, assessed by morphotyping, direct sequencing and mycelial isolation. M

val on growth and mycorrhization of *Picea abies* seedlings outplanted on a forest clear-cut; Mycorrhiza (2010) In press

**ARG mägia**asadel vaid AM

ivum, mesentericum, macrosporum -cys pole

ular mycorrhizal mutualism. Proc. R. Soc. Lond. Ser. B 275: 1029-1035.

plants. Ann. Bot. 104: 1255-1261.

**mükohet** taimed võivad olla ev

Mycoheterotrophic interactions are not limited to a narrow phylogenetic range of arbuscular mycorrhizal fungi. Mol. Ecol. In press.

duced water stress. Can.J.Bot. 51: 1579-1588

guez A, Stevens R, Wilke A, Wilkening A, Edwards RA. 2008. The metagenomics RAST server – a public resource for the automatic phylogenetic and functional analysis

**Manause läl Manause kandis erin mujal amasooniast** happeline N-vaene liiv; sademed okt-mai, üleuj jaan-juuni. Varzea muld K, P-rikas, Igapos N

rdkinson BP, Kukwa M, Lücking R, Hestmark G, Ojalora M.G, Rauhut A, Büdel B, Scheidegger C, Timdal E, Stenros S, Brodo I, Pe **Lecanoromycetes**

, preiliminary phylogeny of the tribe Miconieae (Melastomataceae) based on nr I taimedele 24LR praimer 240 bp LSU

haltsbestimmung von Chimaphilin in *Chimaphila umbellata* Urtinktur mittels differentieller Puls polarographie. Pharmazie 52: 451-453.

**chimaphil**

xicology, and ethnomycology. Mycol. Res. 107: 131-146.

**toksiinid**,

ce in heath and **forest tundra ecosystems is closely correlated** with presence and type of mycorrhizal fungi in roots. Oecologia 115: 406-418.

phyte genotypes in a *Woolisia pungens* (Ericaceae) root system. Aust. J. Bot. 50: 559-565.

us (1 m eemal) juurest saadud kultuuride põhjal. Palju selliseid isolaate, mis hilje **mikrosatelliitpraimerid** genetite tuvastamiseks, ITS-RFLP (3) liikide grupeerimiseks ErM s

proobid

ability on rhizomorph generation by *Armillaria tabescens* in comparison with *A. gallica* and *A. mellea*. Mycol. Res. 106: 897-704.

ng. Mycol. Res. 111: 339-346.

anistic backgrounds and experimental approach with a decomposer food web. Oikos 83: 180-194.

ilcoxina

Research Institute, Helsinki. 101 p.

**Cenococ**

un. `Vanamo` 9: S197-S201.

neb

eritud puude istandikes. Enamasti levitas Kew Bot Aed. Puud ameerikast, seemned euroopast. Enamus seemni levinud koos puu kasvumullaga. Männiga eriti laialt levinud Su

ektendoMR seemed: varajane kolonisatsioon, väike konkurentsivõime, kasu

acceleration · Kõdulagundamisel koduväljajaelis-5.4%, 6.6% ja 19.5% vastavalt kõdu kvaliteedi langusele;

phology is a better predictor of phylogenetic relationships than ascospore morphology in the Sordariales (Ascomycota, Fungi). Mol. Ph **Sordariales**; LSU+RPB2+B-tub pere of DNA extraction and purification procedures for soil and sediment samples. Appl. Environ. Microbiol. 65: 47 **DNA eraldamine**: fenooli või kloroformi etapp v oluline; lü y substances from soils and sediments. J. Microbiol. Meth. 44: 49–58. **DNA eraldamine** huumushapetest ja muust sodist -palju m

stem collapse in Pleistocene Australia and a human role in mega **arv et hiidlinnud** ja teised suurloomad surid Austraalias välja 45000 a eest tanu inimese põhj kliimamuutuse d Aculeiferum.. Austr. Syst. Bot. 16: 27-33.

7-705.

**Acacia: osad harud** Austraalias, osad Aafrikas-L-Am

**Acacia: subgen** Acacia, Aculeiferum

alysis of the Acacieae and Ingeae (Mimosoideae, Fabaceae) based on trnK, matK, psbA-trnH, anf trnL-trnF sequence data. Syst. Bot. **Acacia + Ingeae** (Mimosaceae) -aka le new volvate genus in the Elaphomycetaceae from Guyana. Mycol. Res. 105: 1268-1272. **Pseudotulostoma** gen nov. 2 lii;

**Kariibi mere saartel EcM taimed Cocoloba, Andira inermis** (Papilionaceae), arv ka Hymenea courbaril (Caesalpinaceae). Uued liigid **Kariibi mere saartel EcM taimed Co** 228.

ot. 61: 909-916.

a 95: 176-183.

erished soils. mitteMR juured domineerivad väga toitainevaestes tingimustes Carex ja Proteaceae rühmades. Norm toitainete korral teevad normaaljuuri.

axillus, mitte Cenococcum

the new Russulales. Mycologia 98: 960-970.

**Russulales** LSU: 2 EcM haru: 1) Rus

of ectomycorrh **maasiseste viljakehadega seemte eosed püsivad** mullas kevadeni palju rohkem vrd maapealsete viljakehadega seentega; **Maasisestel seentel eoseid rohkem k** ds: mycelial and cultural characteristics of field and pot culture isolates. Can. J. Bot. 65: 598-606.

17 others. Bio **invasiivsed liigid: kasu ja kahju levikul mutualistidest, konkurentidest, vaenlastest, abioot kk sobivusest ja nende interaktsioonidest. L** ): 62-74.

**keskkonnast seemte** sekveneeri **keskkonnast** seemte sekveneerimine: praimerid, regioonid,

ison SP, Hurlbert AH, Knowlton N, Lessios HA, McCain CM, **latituudi gradient**: ülevaade hüpoteesidest, kõigil tähtsamatel organismirühmadel nüüd ja aja; peremeestaimel.

**ispinnasel**

3. 2012. Biogeography revisited with network theory: retracing **network-anal** kasutamine biogeograafias hydrothermal vent koosluste **network-anal** kasutat nyceten als mykorrhizabildner bei kiefer und fichte. Svensk Bot. Tidskr. 33: 91-93.

3ot. Ups. 5.1: 3-147.

usega alal

**ARDRA bakteritele** + juhust kloonide sekv

**power-analüüs** optimaal

ality DNA from plants. Mol. Ecol. Notes 3: 666-668.

**DNA eraldamine** taimematerjalist 96-täite kaupa SDS + rä

han S, Lang A, Machmuller M, Taylor M, Witt CA. 2014. Mycorrhizal t põua, temp, CO2 ja O3 mõju AM ja EcM ohtrusele ja aktiivsusele

lbicaulis (5-okka-mänd): madal BD Domin Cort, Suillus-Rhizop, Hygrophorus

the characterisation of fungal communities: methods for DNA extraction, PCR a **seentele LSU P1, P2** (40 ja 85 **DNA eraldamine** vanadest metallmaalist: vaja lisaks Che mbiosis: community-ecological consequences and practical implications. In: Allen M (ed) Mycorrhizal functioning. An integrative plant-fungal process. New York, USA: r Manipulation of Ectomycorrhizal Fungi. In: ???

Conservation and management of forest fungi in the Pacific Northwestern United States: an integrated ecosystem approach. In: ???

genus Rhizopogon. III. Influence of co-cultured conifer species on mycorrhizal specificity with the arbutoid hosts Arctostaphylos uva-ursi and Arbutus menziesii. New Phy

lence and the **modelleerimine: negatiivne ruumiline soltuvus: nork neg soltuvus** -liigid kobaras, juhustlikult; 2. tugev ja levimisvoimalus suur voi väike: kobaras rastriline

es: positive fre **Üldine diversiteediteooria positiivse tagasisideme kohta, kus vaja** asustamiskolbmatuid alasid. arusaamatu

naivosolo R, Eggleton P, Barraclough TG, Vogler AP. 2009. Accelerated species inventory on madagascar using coalescent-based models of species delineation. Syst. Biol dealing with incongruent gene trees and phylogenetic reconstruction methods. Mycologia 98: 937-948. **Cantharellloid clade: Basaalne haru**

ides of euagarics. Mol. Phyl. Evol. 23: 357-400.

**LSU kandseened**

**LSU homobasidiomycota**

ma inferred from the internal transcribed spacers and 25S ribosomal DNA sequer **ITS: LR0R, LR21; LR3; LR5; LR7; ITS liigisene e** **Ganoderma** : ITS

itred. Protist 161: 7-34.

**Barcoding: Diatoomid ITS on parem kui COI praimerite sobivuse ja eristatav**

fungi. Can. J. Bot. 77: 1580-1594.

**ErM kultuurist RFLP, 5 RE, I.**

**ErM seemed: ITS2 sekveneerimine F**

er relations of the mycorrhizal association Helianthemum almariense-Terfezia clavaryi. Mycorrhiza 10: 115-119.

resadola, Trento, Italy, 714 p.

etwork structu **network-anal: taimeliigid valiti n vastavalt** ohtrusele; MEX taimedel taimede nestedness 2x suurem kui seentel; Öpiku koosluses ka ol fungal biomass from soil ergosterol analyses. Soil Biol. Biochem. 32: 1207-1217.

nces from picoplankton reveal unsuspected eukaryotic diversity. Nature 409: 607-610.

(FAST DNA Spin Kit): 1800 bp tuleb ilusti kätte v paljudest rühmadest.

nse to different root-associated microbial communities and to alterations in nutrient availability. Ann. Bot. Fenn. 41: 263-271.

ference to the jelly fungi. Mycologia 70: 1007-1024.

**heterokandseentel** (Exidia, Tulasnell

etry and spectral mapping technique for the study of the production of manganese-dependent and manganese-independent peroxidases by Pleurotus ostreatus. J. F **MnP: mõc** studies. Oikos 100: 403-405. **ettepanek Bonferroni** I

diversification in the age of angiosperms. Science 312: 101-104.

**sipelgate radieerumine** langeb kokku

); Fungal Diversity 20: 121-155.

**Alnicola: liigikirjeldused, süno.**

jeldust kahtlaseks

**Alnicola cholea** on basaalne teistele

oom genus **Alnicola** (Basidiomycota, Cortinariaceae) based on **Alnicola: poliüfüleiline väh 3 haruga. Hymenogaster ka poliüfüleel ka** **Alnicola: poliüfüleiline väh 3 harug**

ardes M. 2012. Agarics of alders 1 – The *Alnicola badia* complex. *Mycotaxon* 121: 1-22.

my of *Alnus*-associated hypogeous species of *Alpova* and *Melanogaster* (Basidiomycota, Paxillaceae) in Europe. *Cryptog. Mycol.* 32: *Alpova*

*kandera* sp. BOS55. 1. Regulation of enzymatic production. *Bioproc. Engin.* 23: 657-661. **MnP tood**

*kandera* sp. BOS55. 2. Operation in stirred tank reactors. *Bioproc. Engin.* 23: 663-667. **MnP tood**

ification of genes differentially expressed in extraradical mycelium and ectomycorrhizal roots during *Paxillus involutus*-Betu **EMH-s** ekspresseeruvad mitmed geenid teistiti

ndalucía (España). *Bol. Soc. Micol. Madrid* 25: 215–241.

õD väheneb, kuivas sama. Niiskes domin Cort Tom, RuLa, Inc **EcM** seened: niiskes tundras BD väheneb, kuivas sama. Niiskes domin Cort Tom, I

lignin degrading heme peroxidases in the Agaricomycetes. *J. Mol. Evol.* 66: 243-257. **Agaricomycetes: Ligniiniiperok**

reen JL. 2008. A general framework for the distance decay of similarity in ecological communities. *Ecol. Lett.* 11: 904-917. **ruumiline autokorr: c**

of Social Anthropology, Goldsmiths' College, University of London, New Cross. *Kirkia* 13: 323-364.

ybe 4; *Sebacina* 3 *Tricholoma* 3; domin Cort sp1; *Lactarius* aff. *Alnicola*

ies on ectomycorrhizal communities associated with two co-occurring oaks (*Quercus* spp.) in a tropical cloud forest. *FEMS Microbiol. Ecol.* 69: 274-287.

nybe (20), Russ-Lact (12) *Sebacina* (10), *Genea* (9). Huvitavatest *Scabropezia*, *Marcelleina*, *Hydnobolites*, *Hydnoplicata* (*Peziza* aff *badia*).

orks are structured independently of latitude and host guild. *Ecol. Lett.* 17: 340-349.

ionally active methanotroph population in a peat soil microcosm by stable-isotop **13C metaanil kasvavad bakter** **13C DNA** eraldamine mullast, CsCl gradient, 265000g tse

pplications in parasitology. *DNA Cell Biol.* 22: 357–394. **eksperimenti disain j mikroarrayde** eksperime

water relations in mycorrhizal and non-mycorrhizal *Pinus halepensis* in response to drought. *Biol. Plant.* 44: 263-267.

ropagated *Helianthemum almarjense* plantlets with *Terfezia clavaryi* (desert truffle). *Agric. Sci. Finl.* 3: 309-314.

staceae). *Agronomie* 12: 807-809.

ribosomal RNA intergenic regions of *Verticillium alboatrum* and *V. Dahliae*. *Myc. Verticillium: IGS ca* 1570 bp, **Verticillium** IGS ca 1570 bp, 5S RNA pole selles paigas; :

ectomycorrhizal types of *Quercus robur* L. In relation to tree decline and thinning. *Soil Biol. Biochem.* 39: 2897-2904. **8 ens akti**

ntella sp, *Genea* sp; sh ka *Gilkeya* ja *Otidea*. Linidzitest domin *Sebacina*, *Tom* ja *genea-humaria*

a 39: 138-147. **Cortinarius** spp Papuaasias, Australe

47-101. **Cortinarius**, mis seotud lepagea:

l. 77: 32-40.

**Alpid vs Rocky** Mountains: väga palju samu ja sõsarliike. Tihti r **Altai vs Alpid vs Rocky** Mountains: seeneliigid: väga palju samu ja sõsarliike. Tihti regionaalselt aluseline

phy evolved from mixotrophic ancestors: evidence in *Cymbidium* (Orchidaceae). *Ann. Bot.* IN PRESS

ay spruce (*Picea abies*) seedlings in relation to boron supply. *Trees* 15: 319-326.

Jeremia RA. 2011. Differences in fungal communities associated to *Festuca paniculata* roots in subalpine grasslands. *Fung. Div.* 47: 55-63.

Ecophylogenetics: advances and perspectives. *Biol. Rev.* In press. **fülogeneesi kaasami**

an arbuscular mycorrhizas in tropical heath forests? *New Phytol.* 150: 591–599.

celand indicates multiple long-distance dispersal from Australia **Pisolithus** krüptilised liigid on iseseisvalt Austraaliast kohale tulnud I **Pisolithus** krüptilised liigid on isese

**ECM vs AM: ECM vs AM: Uapaca on pigem ECM** kui val pinnal ja **AM** niiskel pinnal, topeltkolonis harvem kui võiks eeldada; **Leptospermum** on ECM kui lähedal teise

Lõuna-Venezi Lõuna-Venezuela Caatinga **EcM** taimed on *Neea*, *Guapira*, *Aldina*, *Coccoloba*, paiguti ka *Gnetum*. Keskm **EcM** kolonis 7-100% Kõigil lisaks ka **AM**. Papili

**Pakaraima** ja kogu *Dipterocarpaceae* **EcM** seened on arv tek e **Pakaraima** ja kogu *Dipterocarpaceae* **EcM** seened on arv tek enne Gondwana lagunemist 135 MAT

lact

oships between mushrooms and false truffles. *McIlvainea* 11: 61-74.

RE, Hjortstam K, Iturriaga T, Larsson K-H, Lodge DJ, May TW, Mintner D, Rajchenberg M, Redhead SA, Ryvardeen L, Trappe JM, Watling R, Wu Q. 2007. Global dive

**Ne, NW Ameerika** **Suillus, Xerula, ITS** **Suillus, Xerula, Armi Suillus, Xer Simpsoni indeks**

avah sugulased, jmuidu oli ka muid, sh *Cenoc*, *Geopora cooperi*, *Rhiz rubescens*, *Tom pilosa*. Arv kottseened on arvukamad parasiteeritud puudel, sest need on stressi all (I

agriculture in insects. *Annu. Rev. Ecol. Evol. Syst.* 36: 563-595.

ophilum. Rühmadest domin *Tomentella* (8), *Inocybe* (3), *Cort* (2), *Sebacina* (2)

, sh *Tarzetta*

es water conductance and limits shoot sodium uptake in white spruce (*Picea glauca*) seedlings. *Plant Soil* 238: 217-225.

t and root hydraulic conductivity in *Ulmus americana* seedlings. *New Phytol.* 153: 153-158.

ment of the effects of environmental heavy metal pollution on the genetic structure **AFLP: Suillus luteus**

cterization of microsatellite loci from the ectomycorrhizal basidiomycete *Suillus* **SCAR markerid Suillus luteus** mikrosatelliitregioonidele

T. 2000. The taxonomic position of *Asterodon*, *Asterostroma* and *Coltricia* inferred from the septal pore cap ultrastructure. *Mycol. Re* **Hymenochaetales**: enamuse liikidel oi

ion and analysis for sustainable forest management in ACP countries -linking national and international efforts. *FAO, Rome.*

alysis or arbuscular mycorrhizal fungal communities via terminal restriction fragm **AM Seentele LSU** praimerid: **FLR4** ja **FLR4** pole **AM**-spets või ei kata kõiki rühmi

n madalas korrelatsioon, ent kumbki sõletub erinevatest kk-tingimustest: taimekooslused sõltusid N-st, ent seened mitte. 0.3 m skaalas autokorr p

l. 2012. How to measure and test phylogenetic signal. *Meth. Ecol. Evol.* 3: 743-756. **fülogeneesi fülogeneetilise signa**

-distance dispersal vehicle in the Southern Hemisphere. *Science* **Lõunapoolkera** subantarktilistel ja parasvöötme saartel mängib tuul olulist rolli (mitte geogr. Lähedus) saml

F. 2009. The ectomycorrhizal morphotype *Pinihriza sclerotia* is formed by *Acephala macrosclerotiorum* sp. nov., a close relative of *Phialocephala fortinii*. *Mycorrhiza* I

lulum; mineraalmullas *Wilcoxina*, *Pinihriza dimorpha*, *Inocybe*1; org-s *Amphinema*, *Pinihr discolor*; aluselisel *Tuber*, *Inocybe*1; happel *Pinihr dimorpha*

anatomische charakterisierung der Mykorrhiza *Lactarius deterrimus*-*Picea abies* in vitro. *Z. Mykol.* 52:407-415.

ties in mycorrhizal and non-mycorrhizal fine roots of Norway spruce (*Picea abies*) and larch (*Larix decidua*). *Can. J. Bot.* 75: 932-938. **peroksida**

Morphology, anatomy, and molecular studies of the ectomycorrhiza formed axenically by the fungus *Sistotrema* sp. (Basidiomycota). *Mycol. Progr.* 11: 817-826.

s in Japan. II. Comparative studies on all species, including shrub **Alnus Jaapanis: levikumustrid, taksonoomia** **Alnus Jaapanis: levikumustrid,**

2004. Polymorphism at the ribosomal DNA ITS and its relation **Tuber melanosp** **Tuber melanosporum: ITS sari** **Tuber melanosporum: Tuber melar** **ARLEQUIN; NCA, jt**

el, Le Tacon F, Robin C, Halkett F, Martin F, Paolocci F. 2013. Fine-scale spatial structure of the black truffle (*Tuber melanosporum*) investigated with neutral microsatell

erit, 2 Helvella-morf sarnased ja väidet omavah assotsieerunud), *Sebacinaceae*

atened by an invasive species? We dreaded it and it has happened **Arv. Et Tuber indicum** koloniseerib Euroopat pms läbi saastatud istikut

e perspectives. *Mycorrhiza* 25: 77-81.

the massive persisting rhizosphere colony "shiro" of the ectomycorrhizal basidiomycete *Tricholoma matsutake* (Fr.) Karst. *IRAP: retrotransposoonidel põhinev geneetiline fingerprint Tricholoma matsutakele inarius*

a subgenus *Phyllosticta* (Mimosoideae: Leguminosae) based on DNA sequences of the internal transcribed spacer region. *Aust. Syst. Acacia: Phyllosticta: kamm-ectomycorrhizal fungi in paired culture and in association with seedlings of lodgepole pine and Sitka-spruce. For. Path. 31: 331-344.*

rhizal morphology and dark septate fungal associations in medicinal and aromatic plants of Western Ghats, Southern India. *Mycorrhiza 17: 11-24.*

**Lõuna-Hiina: Shorea-Castanopsis-Lihocarpus metsas EcM pole**

*view. Mycorrhiza 14: 65-77.*

ulations by denaturing gradient gel electrophoresis analysis of polymerase chain reaction products of primerid 341f ja 806r originaalis

sity hotspots for conservation purposes. *Nature 403: 853-858.* **taimeid ja selgroogsete loomade BD tulipunktid. Endeemsete liikide arv, suhe pindalasse, ohukategooriad;**

al abundances and N use by tundra plants. *Oecologia 107: 386-394.*

ences in forest soil organic matter. *Soil Sci. Soc. Am. J. 52: 1633-1640.*

stem function and service? *Curr. Opin. Environ. Sustain. 2: 75-79.*

and plant production **taimeid biodiversiteeti suurendades kasvab ka bioproduktioon; produktiivsus on sõltuv muutuja**

509. **mikroorganismide funktsionaalsete rühmade arvukus ja suurem liigiline koosseis suurendavad biomassi, vähendab juhuslikku varieeruvust**

nic studies of closely related species in the oriental fruit fly (*Bactrocera dorsalis*) complex. *Mol. Ecol. Notes 3: 662-665.* **50 b** probed *Bactrocera*-kärbsede aktiivi geeni

ri primerid annavad erineva pildi; domin *Saccharomycetales*. Sügavusest pole erinevust

theoM, SordM, ExobasM, TremelloM, MicrobotrM, Asco DSF1, Cryptomycota, Fungi BCGI

the unseen fungal diversity hidden? A study of *Mortierella* reveals a large contribution of reference collections to the identification of *Mortierella*: tüüpikultuuride sek

rends *Ecol. Evol. puuliikide koeksist teooriad parasvõttes: tuul vs putuktolmlemine, seemne suurus vs levimine vs varud vs varjataluvus. Paljudele liikidele on olulised kaits*

**tüüpides: suurim sõltuvus puuliikidest**

the alder wood **Lepikud Iraanis jaot 3 rühma, neist üks A. Lepikud Iraanis jaot 3 rühma, neist üks A. subcordata jõgedes, muud A. glutinosa madalmaa-**  
bovistä, *Laccaria amethystina*) vs suur terve põõsas (*Inocybe lacera*, *Laccaria murina*) vs suur haige põõsas (*Laccaria laccata*, *Laccaria murina*). Noore *Salix* ECM kooslus  
lomin *Laccaria*, *Inocybe*, *Scleroderma* (peremees *salix* reini)

*laccaria laccata*, *L. Amethystina*, *Inocybe lacera*; keskm. *Scleroderma* bovista, *L. T-RFLP: ITS1F-HinFI; ITS3-ITS4*, duubelbändid

**Pearsoni exact test + M**

primary succession. *New Phytol. 169: 169-178.*

al, Hebel mes **Salixi prim kolonis ja EcM nakatamine võimaldab hiljem ka kasel ja lehisel kolonis kui nad EcM seentega nakatuvad.**

and dormancy. *New Phytol. 181: 245-248.*

state root endophyte allied to the Herpotrichiellaceae (*Chaetothyriales*) obtained from some forest soil samples in Canada using bait pl: **Chaetothyriales: Chatospira (C**  
*n* wilt in eggplant by some fungal root endophytes. *Eur. J. Plant Pathol. 108: 103-109.*

nder S, Högbe **ektomükoriisased arv soodustavad suuremat N-limitats boraalsetes okasmetsades; arv. See tagasiside tagab neile ja madalt N toler**

arison of SSU, ITS and COI genes as tools for molecular identification of naked **amööbidel triipkoodistamine: COI palju parem kui ITS (parem resolutsioon,**

**terr, Lacc, Rhizop; 7a Lacc, Rhiz, Suillus; 12a: Amanita, Rhizop; 17a Scleroderma, Amanita, Rhizop, Suillus;**

**ned Indias dipterokarpuste metsas: domin Russulaceae, Inocybe, Amanita. Nimekirjas väga vähe! Peremeespuud Vateria, Hopea, Dipterocarpus**

**taimeid kauglevimine -juhuslik protsess, mis toimub ennustamatute sündmustena. V raske analüüsida harul**

ir phylogeny of *Alnus* (*Betulaceae*), inferred from nuclear ribosomal **Alnus: 2 alamperek ja 3 sektsiooni, mida toetab ITS fülogeen, on Jaapa Alnus: 2 alamperek ja 3 sektsiooni,**  
floras associated with mycorrhizae of red alder and Douglas-fir. In: Trappe JM, Franklin JF, Tarrant RF, Hansen GM (eds.) *Biology of Alder. Pacific Northwest and Range*  
*carune mantel)*

l communities across compost recipes, preparation methods, and Composting times. *PLoS ONE 8: e79512.*

ctomycorrhizas: gene expression, monosaccharide transport and metabolic control. *New Phytol. 150: 533-541.*

*l. Sci. 70: 3321-3323.*

ll number of individuals. *Genetics 89: 583-590.*

tection of 16S ribosomal RNA hybridization on reusable DNA arrays using surface plasmon resonance imaging. *Environ. Mi* **pinnarefrektsioon-pegeldus array. Põhineb k**

rk School revisited. *Aust J. Bot. 49: 389-409.*

**biogeograafia: ajalugu, näited, paralogia**

N, Townsend A, Cleveland CC, Stanish L, Knight R. 2010. Glo **bakteritel globaalselt: arv et laialt levinud bakteriOTUd on laborireostus; ohtrus ja sagedus (**

**JE, Starcy JL mikroobide biogeo ja koosluste str mõjuta mikroobide biogeo ja koosluste str mõjutajad: rev**

JK. 2008. The significance of ectomycorrhizas in chemical quality of silver birch: **primerid AM-seentele SSUsse (spetsiifilised)**

Tatra mäed: EcM *Salix* 2 spp; *Bistorta vivipara* ja *Polygonum bistorta* mood AM

ptibility to attack **kooslustes patogeene kahjustused suurenevad kui lähikonnas on fülogeneet lähedasem liik** **koosluste** uued fülogeneetilise

vs lehtedes: BD sama. Enamus liike kattub maapealsetes ja maa-alustes osades, ent paaril stat olulised erinevused juurtes vs mujal või ülejutatud v

imate over global land areas. *Clim. Res. 21: 1-25.*

frican rain forest Kamerun: EcM puude rohkus mõjutab juurte hulka pealispinnases ja suurendab P hulka mullas. Arv EcM seemned hoiavad üleval tsesalpiinide monodominant:

**Korupi taimeistik: domin EcM tsesalp. EcM tõestati 10 perek: A Korupi taimeistik: domin EcM tsesalp. EcM tõestati 10 perek: Anthonotha, Aphanocalyx, Berlinia, Dideloti**

d dipterocarp forest at Danum Valley, Sabah, Malaysia: structu **Dipterocarbid on** basaalpinna jr domin Sabah vihmametsas Malaisias. Esineb ka *Fagaceae*

ain forest trees **Dipterocarpaceae massviljumine toimub keskm üle ühe aasta peale kuiva kuivaperioodi, millele eelnes niiske kuivaperiood. Arv ecM seemned regul mass-vilj**

age and soil phosphorus on the vegetation of Douala-Edea fores **Kameruni Douala-Edea LKA taimeistiku kirjeldus: vähe EcM puid, millest sagedasemad Anthonothamacro**

**bolan under sitka spruce: distribution, abundance and selective grazing. Soil Biol. Biochem. 16: 227-233.**

**taimesugukondade kaupa EcM, VAM: kontrollimata andmed**

**s: viljakehade liigirikkus sõltub peremeestaime hulgast kogu maal. Cortinari, Naucoria, Russula, Suillus, Leccinum, Hygrophorus liigid teada vaid üksikute peremeestaime**

g oak and birch. I. Nutrient uptake and the development of mycorrhizal infection during seedling establishment. *New Phytol. 117: 37-44.*

g oak and birch. II. The effect of fertilizers on growth, nutrient uptake and ectomycorrhizal infection. *New Phytol. 117: 45-52.*

s kasele või tammele. *Scleroderma* eelistas selgelt tamme ja *Paxillus* eelistas kaska. *Cenoc. arenes* eriti potis

*corrhiza 2: 75 varajased-hilised*

ies of *Leohumicola* from South Africa and the United States. *Persoonia 21: 57-69.*

**Leohumicola: ITS vs Cox1 bar**

tes in mycorrhizas of Norway spruce and changes induced by exposure to frost and desiccation. *Eur. J. For. Path. 22: 291-299.*

. *J. Ecol. 95: 1* **Network-anal: absol nestedness ei sõltu** proovide arvust, suht nestedness: 50% proovidest on ok, connectance puhul 25% on ok

l. Colonisation and molecular diversity of arbuscular mycorrhizal fungi in the aqu **AM seentele LSU** nested amplif: 1-universaalne, 2. eri klaadidele eri degener primerid

on of ectomycorrhizal fungi in rooting of Scots pine fascicular shoots. Can. J. For. Res. 30: 1221-1230.

ogenous auxins influence root and mycorrhiza formation of Scots pine hypocotyl cuttings in vitro. Tree Phys. 22: 1231-1239.

IBA stimu

ng summer in Mikroobne ens aktiivsus palju suurem leppade kui mändide all

Mikroobn

iora terrestris, tomentellopsis sp

ater fungi on decaying leaves: comparison of traditional and molecular approaches. DGGGE, T-RFLP vs koniidide lugemine: erinevused; T-RFLP ei suuda eristada 18S lõikusi mycorrhizae of Norway spruce. Plant Soil 198: 179-184.

rhizal mycelia ErM+ECM biomass suureneb lokaalsel toitaenete gradiendil kui toiyu on vähem (mõõmistehnika kahtlane, saproobide lahutamine peale proovide pikka seis al fungi in a norway spruce forest was reduced in response to nitrogen fertilization. New Phytol. in press.

mpetrum hermaphroditum on development and nitrogen uptake by roots and mycorrhizae of Pinus sylvestris. Can. J. Bot. 71: 620 - 628.

tion and diversity on the boreal forest plant-soil system. Oikos 86: 16-26.

IF, Ryberg M, Kristiansson E. 2010. An open source chimera checker for the fungal ITS region. Mol. Ecol. Res. 10: 1076-1081.

eline for processing and identification of fungal ITS sequences. Source Code in Biology and Medicine 4: 1.

lves A, Anderson CL, Antonelli A, Arnold AE, Bahnmann B, Bahram M, Bengtsson-Palme J, Berlin A, Branco S, Chomnunti P, Dissanayake A, Drenkhan R, Friberg H, F

cific ITS variability in the kingdom Fungi as expressed in the international sequence databases and its implicatio barcoding seentel: barcoding barcoding seentel: pr

omic affiliation of unidentified sequences in public databases - an example from the mycorrhizal fungi. BMC Bioinforma automaatne blast otsingute kordam automaatne blast otsingi

ular identification of root tip mantle mycelia provides strong indications of ectomycorrhizal associations in two species of Sistotrema. Sistotrema: vaid üks klaad koos Hyc

reliability of DNA sequences in public sequence databases: a fungal perspective. PLoS ONE 1: e59.

andmebaasides palju v kaugeid sarnasuseta sekventse ja v

hoch CL, Nylander JAA, Bergsten J, Porter TM, Jumpponen A, Vaishampayan P, Ovaskainen O, Hallenberg N, Bengtsson-Palme J, Eriksson KM, Larsson K-H, Larsson

Pennanen T, Stenlid J, Bruns T, Larsson K-H, Kõljalg U, Kausserud H. 2011. Towards standardization of the description and publication of next-generation sequencing dat

son E, Ryberg M, Jumpponen A, Abarenkov K 2010. An open source software package for automated extraction of ITS1 and ITS2 from fungal ITS sequences for use in h

ne A, Bertrand Y, Alfredsson JF, Larsson K-H, Kõljalg U, Abarenkov K. 2011. A note on the incidence of reverse complementary fungal ITS sequences in the public seque

343: 493-494. metaani kogus atmosfääris on alates 2007 tkiiresti tõusnud, kuigi vahepeal langes. T

ja pöögil, Tricholoma terreum, Hygrophorus russula männil ja pöögil, Geastrum fornicatus, fimbriatus -männil ja nulul; mütseeli jälgimine mükori

gi, construction characteristics and environmental conditions on the quality of wooden check-dams. J. For. Prod. 58: 72-79.

of astigmatid mites using the second internal transcribed spacer (ITS2) region and its application for phylogenetic study. Exp. Appl. A Acari: liigisisene var ITS < 2%

comparing fertilizer N transformations in soil and trees of a Scots pine ecosystem. Plant Soil 158: 169-182.

octonia-like fungi from roots of three orchid genera, Pachiopedilum, Dendrobium, and Cymbidium, collected in Chiang Rai and Chiang Mai provinces of Thailand. Mycor

idudele, mida on eelnevalt lagundanud Fomitopsis pinicola

drive diversity-dependent mortality in established seedlings of two dominant African rain-forest trees? J. Trop. Ecol. 26: 1-9.

seedlings using image analysis. Scand. J. For. Res. 10: 347-352

fysiologi. Svensk Bot. Tidskr. 38: 121-122.

skr. 43: 485-490.

pecial reference to mycorrhiza formation. Symb. Bot. Ups. 11.1.

ces of two Alnus species. Can. J. Microbiol. 28: 1133-1142.

lineages. Biol. J. Linn. Soc. 79: 69-84.

lpine flora of I kõrgmägede floora eripärad, tüübid ja võõ kõrgmägede floora eripärad, tüübid ja võõndid Iraanis. EcM taimedest siin-seal arvukad Ko

al P. pleurocystidiata sp. nov. and P. carmanahensis reconsidered. Mycologia 92: 984-991.

ities associated to Nothofagus species in Northern Patagonia. Mycorrhiza 23: 487-496.

Phlebopus bruchii ei mood EcM Fragara cocoga. Eluviisi lähemalt ei kirjeldata

carp production from Nothofagus dombeyi and N. pumilio forests in southern Argentina. Mycologia 104: 45-52.

iew of the Boletineae. Fung. Biol. 117: 479-511.

tualistic netwo antinested mustrid ilmuvad kui koevolutsioon suurendab vastastikust spetsialiseerumist; koevolutsiooniltähtis roll networki kuju mõju

mberloff D. 2013. Exotic mammals disperse exotic fungi that promote invasion of exotic trees. PLoS One 8:e66832.

iz 3 spp. Wi EcM seened fasilit Mä invasiooni ARGs

trient acquisition patterns by mycorrhizal fungi of rare and common orchids explains diversification in a global biodiversity hotspot. Ann. Bot. 111: 1233-1241.

patterns of intact Pinus sylvestris mycorrhizospheres in dry pine forest soil: an electron microscopy study. Can. J. Microbiol. 43: 1017-1035.

in Lactarius section Deliciosi in Europe. Mycol. Res. 111: 1285-1297.

Natural Areas Journal 6: 6-36.

racellular protease activity in different species and genera of ectomycorrhizal fungi. Mycorrhiza 17: 241-248.

nary Biology Centre, Uppsala University.

Hebeloma cylindrosporum mycorrhizal with Pinus pinaster and P. sylvestris L. in hydroponic culture. Mycorrhiza 4: 247-250.

orrhizal colonization of Sitka spruce (Picea sitchensis) and ash (Fraxinus excelsior) in Irish nursery soil. For. Path. 30: 165-174.

tiiv vs. niiske

arpellales and Kickxellales. Mycologia 90: 624-639.

among ascomycetous truffles and false morels inferred from 18S and 28S ribosom SSU, LSU kottseentel: ei ühti eriti

in a monophyletic lineage of the fungus Fusarium are nonorthologous. Mol. Phyl. Fusarium, ja selle teleomorf Gibberella: mtSSU, nuL Fusariumil ja selle teleomorfil Gibbe

lani species complex. Mycologia 92: 919-938.

ng mucoralean fungi (Zygomycota): evidence for family polyphyly on a large sca EF1a, LSU, SSU

hizopogon sp

JPN Vulkaani primaarsukts: Quercus, Betula, Populus maximowiczii, Salix sachalinensis, hultenii mood EcM

omycorrhizal fungi in potted Populus maximowiczii seedlings. Mycoscience 50: 143-145.

013. Enigmatic Sebaciniales. Mycol. Progr. 12: 1-27.

Sebaciniales, a case study. Mycol. Progr. 13: 445-470.

Sebaciniales: Sebacinaceae s.str

luation of the Ceratobasidium-Rhizoctonia complex and Rhizoctonia butinii, a new species attacking spruce. Mycol. Progr. 12: 763-777 Ceratobasidiaceae: perek Rhizc

his (sh Hygrocybe A-horis) Arv 97 protsentü ITS regiooni identsust on konservatiivne l

composition on ectomycorrhizal colonization and seedling growth. Plant Soil, IN PRESS.

Trends Microbiol. 11: 272-279.

most utilization taimtuiduliste putukate kooslust mõjutab taimede fülogeen lähedus; efekt eksponentsiaalselt kahanev

ny and historical biogeography of true morels (Morchella) reveals **Morchella**: paljude geenide põhjal väh 40 liiki - M. Elata ja **Morchella**: paljude geenide põ

i. In: Veblen T Nothofagus NZL: ülevaade

or novel and specialized mycorrhizal parasitism: the orchid *Gastrodia confusa* gains carbon from saprotrophic *Mycena*. Proc. R. Soc. Lond. Ser. B. 276: 761-767.

ungi during the evolution of autotrophy to mycoheterotrophy in Cymbidium (Orchidaceae). Am. J. Bot. 99: 115 ITS1OF ja ITS4OF ei tööta Tulasn puhul eriti

l preference towards ectomycorrhizal fungi with contrasting geographic distributions in Japan. Mycorrhiza 18: 331-338.

ation of wood-decaying fungi by hybridization of immobilized sequence-specific oligonucleotide probes with PCR-Amplified **ARRAY** seente identifitseerimiseks puudust: li

ama, ent kooslused erinevad

**tamine**: üldiselt kahaneb, urea soodustab

**larch seedlings assessed by ergosterol assay. Mycologia 92: 394-398.**

enus Boletus in pure culture. Mycoscience 44: 295-300.

aji, in pure culture. Mycoscience 35: 147-151.

eloma in pure culture. Mycoscience 39: 15-19.

ificity in Lecanorchis. Mycorrhiza 22: 545-553.

il, Solymos P, Stevens HH, Wagner H. 2012. vegan: Community Ecology Package. Available from <http://vegan.r-forge.rproject.org/>.

ue?. Oikos 94: 27-38. **pseudoraplifikatsioon on**

605. **pseudoraplifikatsioon on**

s var. magnus (Diapensiaceae) is regarded as ericoid mycorrhiza from its structure and fungal identities. Mycoscience 52: 425-430.

: European species of Clavulina (Cantharellales, Basidiomycota) inferred from phylogenetic analyses of ITS region and morphological **Clavulina**: suur liigisisene mor

production and nitrogen fixation of black locust (Robinia pseudoacacia) seedlings grown under elevated atmospheric carbon dioxide. New Phytol. 142: 133-140.

l. Insight into trade-off between wood decay and parasitism from the genome of a fungal forest pathogen. New Phytol. 194: 1 **Heterobasidion annosum** genomika

11: 438.

o. Infect. 4: 1353-1359.

ood EC, Damico JA, Itoua I, Strand HE, Morrison JC, Loucks **maakera jagamine** 8 realmiks ja 14 bioomiks

cautionary examples from the human genome. Mol. Biol. Evol. 19: 93-100. **mitokondriaalsete pse** **mitokondriaalsete pseudogeenide tu**

14. Response of ericoid mycorrhizal colonization and functioning to global change factors. New Phytol. 162: 459-469.

egies of Myco **ECM vs AM: EMH ehitus, RM, transport, sink, source, EMH kasv: ülevaade** **ECM, AM**

**Gomphidius sõltuvus Suillus spp.** **Suillus + Gomphidius** sega-DNA, erikontsentratsioonid ja vahekorrad

bacterial community in soils amended with various primary minerals. FEMS Microbiol. Ecol. 27: 195-205.

bacterial community in soils amended with various primary minerals. FEMS Microbiol. Ecol. 27: 195-205.

bacterial community in soils amended with various primary minerals. FEMS Mic **PLFA**

edling survival **troopilised ECM-puud: seemikud sõltuvalt kaugusest emapuust (oluline) ja ECM kolonisatsioonist (pole oluline)**

**Kameruni lõunaosa ECM puud: Uapaca spp, Gnetum 3 spp, Caesalpinoideae: Anthonotha, Berlinia, Brachystegia, Didelotia, Gilbertiodendron, Julbenardia, Monopetalanth**

**i Tropenbosi a Kamerunis inokpot: muld Gnetumi alt vs Afzelia alt vs Amhersteae alt nii raiatud kui ürgses metsas Tetraberlinia ja Afzelia** seentele -oluline saidi ja häiringu

tion of Glomeromycota: the virtual taxonomy of environmental sequences. Botany 92: 135-147.

okulumi potentsiaal **AM seemed + DGGE**

mycorrhizal fungal communities colonize roots of Pulsatilla spp. in boreal Scots pine forest and grassland soils. New Phytol. 160: 581-593.

lar mycorrhizal fungal communities in different ecosystems around **AM biogeo taksonitel** (klaadidel) erinev: lokaalsed, regionaalsed ja globaalse levikuga liigid. AM BD suuri

diversity of arbuscular mycorrhizal fungi in a boreal herb-rich coniferous forest. New Phytol. 179: 867-876.

f. 2010. The online database MaarjAM reveals global and ecosystemic distribution patterns in arbuscular mycor **Fülotüüpide** nimetamine, esindussekvenside loom

M, Koorem K, Leal ME, Liira J, Metsis M, Neshataeva V, Paal J, Phosri C, Pölme S, Reier Ü, Saks Ü, Schimann H, Thiery O, Vasar M, Moora M. 2013. Global sampling

ersity and DN **mullauuringute metoodika standardiseerimise vajadus ning ühtse andmebaasi loomine**

ase K. 2010. Taxonomic reconsideration of a sequestrate fungus, Octaviania columellifera, with the proposal of a new genus, Heliogaster, and its phylogenetic relationship

stematics of the sequestrate genus *Octaviania* in Japan: two new subgenera and eleven new species. Persoonia 28: 85-112.

**ante perek nim Uus-Meremaa EcM taimed: Leptospermum, Kun Uus-Meremaa EcM taimed: Leptospermum, Kunzea, Nothofagus.** Seente perek nimekirjad nii kohalike pu

omposer fungal communities and decomposition processes of leaf litter. Can. J. Microbiol. 52: 701-716.

omposer fungal communities and decomposition processes of leaf litter. Can. J. Microbiol. 52: 701-716.

nino acids in grassland and arable soils. Soil Biol. Biochem. 31: 1751-1755.

oos A-J, Nöjd P, Uri V, Merilä P, Asi E, Löhmus K. 2011. Fine root foraging strategies in Norway spruce forests across a European climate gradient. Glob. Change Biol. 17

ub seeneliigist. Mantel 16.5 -29 (max 70) ym, korteks 84 -104 ym, steel 123 -166 ym. Rikkalikemal mullatüüpidel oli suurem korteksi, steeli, kogujuure diam

ycorrhizal root traits in *Alnus* species? Can. J. For. Res. 39: 1787-1796.

tic Rhizoctonia-like fungi from tropical orchids. Am. J. Bot. 89: 1852-1858.

etween two tropical orchids. Mol. Ecol. 13: 2393-2404.

stems in the ectomycorrhiza-building basidiomycete *Paxillus involutus* (Bartsch) Fr. and its reaction to cadmium. FEMS Microbiol. Ecol. 42: 359-366. **antioksid:**

i chordata

e puudest: kaugus mõjutab %kol ja liigirikkkust

isteerimine tüvedel kasutades Bayese meetodeid; Stat oluline co-occ võib tuleneda paljudest asjaoludest ja see püstitatab vaid **kooseksisteerimine t**

. 16S T-RFLP ja sekveneerimine sam tulemustega, mitmed DGGE bändid on kin **bakterite ja arhede BD** hüpersaliinses (kuni 32%) vees. 16S T-RFLP ja sekveneerimine sa

id: hea ülevaade **mikroobide BD** mõõtmise põhjustel ja mõõtmismeetodid: hea ülevaade (nt RISAs, ARISAs,

eneity and mycorrhiza as determinants of plant species diversity. Acta Bot. Neerl. 46: 237-254.

nn. (in Estonian)

ta Mycol. 16: 97-103. **Coltricia**

mycorrhizae in nurseries. Acta Mycol. 27: 49-61.

us silvestris L.). Warsaw, Forest Research Institute. 130 p.



in Zimbabwe. Mycotaxon 75: 225-228. **Mackintoshia** gen nov Boletale

ia eukalüptimetsas (koos Nothofagus cunninghamiiga): pms mõj seenekooslusi metsa vanus ja geoloogiline aluspõhi  
to evolutionary divergence at the molecular level. Science 314: 119-121. **liigiteke on pms punktuatsiooniline, molekulaarse**  
877-884. **sete kellade kalibreerim**

inberra, Australia.

r. 29: 1517-1530. **Castanea dentata** vs Endothia

rylus, Quercus, Pinus; T. Rufumil ka P. Sylvestris, Abies alba, Tilia, Fagus jt. T rufum ja melanosp -cys pole  
isatsioon, EMH jämedad, paksu kestaga, tihedate septadega

Mantel nurgeline kuni subepidermoidne. EmH jämedad, esinevad rakusisesed hüüfid. Tõestatud RFLP analüüsiga vs VK  
s, Helotiales sp; linidzitest domin Tom-Thel

axillus, Boletus, Russula, Gautieria, Cenococcum

ion and cpDNA **kase fylogeograafia, programmid; cpDNA kask. 3 levikutsentrit peale jääaega: Ural, Alpid ja Louna-Skandinaavia**

Sebacina (4), huvitavatest Chromelosporium, Pulveroboletus pulverulentus, Byssocortium, Hydnobolites. Liikidest domin Scleroderma areolatum  
t, Tuber, Sebacina; liikidest Scleroderma areolatum, Russula pectinatoides, Russula sp **taimeperemehe määramine ITS järgi**

375-397. **arvutisimulatsioon fenogramm RFLP, AFL**

etic orchid is non-specific in its mycorrhizal associations. Mol. Ecol. 22: 2341-2354. **AFLP; 2praimerit; RFLP: 2RE ITS liigisisene polümorfism**

'cola in culture. Can. J. Bot. 40: 1313-1319.

iber uncinatum: two morphotypes or 3 two species? FEMS Microbiology Letters in press. **Tuber aestivum ja T. Uncinatum on**

mperate to boreal forests. Glob. Ecol. Biogeogr. 20: 170-180.

Pezizales 3 spp, theleporoid 2 spp, Cortinarius ja Hebeloma

ion in R language. Bioinformatics 20: 289-290.

tomycorrhizal fungi mediated by Agrobacterium tumefaciens. Mycol. Res. 106 : 132-137.

osystems at regional and global scales. In: West JB, ed. Isoscapes: Understanding Movement, Pattern and Process on Earth Through Isotope Mapping. Springer: New Yor  
ing foliar and root d15N. Biogeochem. 80: 143-171.

12. Glacial survival of boreal trees in Northern Scandinavia. Sci Andoya saar N Norras oli jääaja refuugium

orphological discrimination of stipitate hydroids in the genera Hydnellum and Phellodon. Mycol. Res. 111: 761-777. **Phellodon ja Hydnellum liigikomplei**

erson DJ, Katz LA. 2010. Broadly sampled multigene analyses yield a well-resolved eukaryotic tree of life. Syst. Biol. 59: 518-533. **Eukariotiidid: plastiide on oma**

-or ammonium-saturated 2:1 phyllosilicates by ectomycorrhizal fungi in vitro. Soil Biol. Biochem. 27: 1237-1244.

I K, Geiser DM, Kang S. 2011. Cyber infrastructure for Fusarium: three integrated platforms supporting strain identification, phylogenetics, comparative genomics and kno  
r Entomobryomorpha (Collembola: Hexapoda). Entomol. Res. 39: 334-340. **Collembola: ITS**

mycorrhiza and vesicular-arbuscular mycorrhiza formation in disturbed and undisturbed forest soils of Southwest Oregon. Can. J. For. Res. 13: 657-665.

velopment and growth of Douglas-fir and western red cedar seedlings. Can. J. For. Res. 13: 666-671.

thern Spain to colonize Douglas-fir and other introduced conifers. Mycorrhiza 6 :51-55.

em diameter growth response of Pinus pinea seedlings mycorrhizal with Rhizopogon roseolus and submitted to two water regimes. Mycorrhiza 11: 129-136.

species for the production of Pinus pinaster and P. sylvestris mycorrhizal seedlings under greenhouse conditions. Mycorrhiza 14: 171-176.

an igapó flood **Rio Negro igapo: domin Aldina latifolia üleujutatava ala ülemises osas**

rs. 2004. Centu Igapo, Varzea taime ökofüüs omadused, sh Salix, Aldina

us, Russ2, Russ3\* Lact\*; CO2 rohkem: Russ1, Russ2\*, Lact1, Russ2; kladidest ITS4NA praimer, 97% ITS kriteerium, mass-sekveneerimine **Chao koosluse sarnasus**

attem to process in fungal symbioses: linking functional traits, community ecology and phylogenetics. New Phytol. 185: 882-886.

nandid ja koosluse str muutuvad. EmH: Tylospora D, Thel; EcM: Russula G. Kokku domin Theleporoid 63; Sebacina 11; Russula 9

era to epacrid mycorrhizae and to Hymenoscyphus ericae display specificity. Can. J. of Bot. 78: 841-850. **taime rets**

ne grassland c alvarite taastamine. Alvarilt võetud mullapahmakas olevad taimed kadusid metsa istutades ära, värskest raadatud rohumaale viies jäid aga püsima. Mingit efe  
ion in species **Eesti alvarite jaotus kuueks kladiks (liigilise koosseisu baasil)**

onships across **taimedel liigirikkuse-produktsiooni seos li taimedel liigirikkuse-produktsiooni seos lineaarne troopikas, ent unimodaalne parasvöötme**

en calcareous **16 alvaril ei esine geograafilist liigirikkuse agregeerumist, tuumik-liikidest sõltub liigirikkus, satelliitliikidest mustriüks** Mantel test + Monte Ca

l alvar commu **karussellimudel töötab nii suures kui väikeses skaalas metsas, raiesmikul, niidul**

s determined b **taimeliikide arvu ja liigifondi vahel tugev korrelatsioon nii alabaasil kui varte arvu baasil alvaritel läänesaartel**

il scale. Ecol; **taimed vs pH: kõrge pH tugevas korrelatsioonis li taimed vs pH: kõrge pH tugevas korrelatsioonis liigirikkusega. Suurem osa liigitekketsentrid kõrge pHga**

ecological papers. Acta Oecol. 30: 97-99. **online supplementide ja toorandmete kättesaadavuse vajalikkus meta-uuringuteks**

. Increased air humidity and understory composition shape short root traits and the colonizing ectomycorrhizal fungal community in silver birch stands. For. Ecol. Manage.  
imed: vahet pole, ent Inoc, Hebeloma ja Laccaria (Agaricales!!!) vähem transgeensetel taimedel ja Phialocephala palju rohkem Arv siiski, et taimek  
ly: a unified approach. Biol. Rev. 86: 792-812. **fülogeneetilise diver**

geny, traits, abiotic variables and space: a novel approach to linking environmental filtering and plant community assembly. J. Ecol. 99: 165-175. **Fourth corner analüü**

ommunities: a double principal coordinate analysis. Journal of Theoretical Biology 228: 523-537. **PCoA**

arbuscular mycorrhizal fungi. Nature 427: 733-737.

otic richness beyond the animal, plant, and fungal kingdoms. PLoS Biol. 10:e10 **protistide barcoding: SSU protistide barcoding protistide barcoding: SSU eel-t**

A. 2015. Quantitative evaluation of bias in PCR amplification and next-generation sequencing derived from metabarcoding samples. Anal. Bioanal. Chem. 407: 1841-1848.

ies of Armillaria. Can. J. Bot. 65: 69-71.

. new insights into gene flow in the Australian bush rat, Rattus fuscipes. Evolution 57: 1182-1195. **Mantel test on nõrge**

om Phanerochaete chrysosporium. J. Bacteriol. 174: 3532-3540. **MnP: Pha**

ra. J. Biogeogr. 34: 132-146. **Antarktika samblad ja samblikud. Arv mitmed samblikud iidse vikariantse levikuga, samblad hiljutised kol**

t-oliv, Humicola-endof; kontr: Wilc, Laccaria, Rhiz-occid **ADONIS-R-põhine**

g to the biogeography of fungal-plant interactions across roots, shoots and ecosystems. New Phytol. 185: 878-882.

scale is driven by stochastic and deterministic processes and ge **EcM kandseente levimine eostega on maastiku skaalas piiratud. Erinevused nii ajas kui ruu**

iz occidentalis, Thel terrestris, Tom subil sagedaimad eri alade **EcM seente liigirikkus** kasvab kooslustes seoses pindalaga 2-10000 m<sup>2</sup>. Puurühmade kaugusest liigirikku  
icroorganisms: isolation reduces species richness on mycorrhiza **EcM seentel** - isolatsioon vähendab BD: üksikpuudel 1000 m peale liigirikkus kukub 50%  
t with a molecular master. Bioscience 58: 799-810.

(13), Cort(12), muuh ElaphoM, Helot???,Piloderma, Sord

**Ruumiline** autokorr:

fungal dispersal : macroecological patterns driven by microscop **EcM seened:** eoste efektiivne levik, kus taimed mükoriisid 100-1000 m; Eri liikidel erinev  
er, and mixed **lepaga segametsades krüptogaamide BD suurem**

cts plant competition for phosphorus between Pinus elliottii and Panicum chamaelonche. Mycorrhiza 9: 199-204.

ing and Conservation. Royal Botanical Gardens, UK.

esser Antilles. Kew Bull. 33: 601-627.

**v vähe EcM seeni** (ilmselt korjatud valedes kohtades); s.h. Phle **seened Keenias:** v vähe EcM seeni (ilmselt korjatud valedes kohtades) **seened Keenias:** v vähe EcM seeni (

Zambia. Kew Bull. 37: 255-271.

**Väikeste antillide** seenestik: sarnaneb mandri-L-Am omaga enim **Väikeste antillide** seenestik: sarnaneb mandri-L-Am omaga enim. EcM **Väikeste antillide** seenestik: sarnane

:kley &Curtis. 1987. Kew Bull. 42: 501-585.

e &Murrill. 1987. Kew Bull. 42: 855-888.

nd species. Kew Bull. 43: 53-75.

l: EcM seentest 2 liiki Inocybe, uued liigid

**Kapimaaal: EcM** seentest 2 liiki Inocybe, uued liigid

**Kapimaaal: EcM** seentest 2 liiki Inoc

Vilgalys R. 2001. Multiple origins of sequestrate fungi related to *Cortinarius* (Cortinariaceae). Am. J. Bot. 88: 2168-2179.

**Cortinariaceae** (sõsar arv Gymnopilt

*be* and *Rapacea* inferred from ITS and LSU rDNA sequences. Mycologia 94: 620-629.

**Cortinarius** sisaldab Rozites, C

t chrysorrhoeus, Lact sp, Boletus aereus, Piloderma sp; EmH: Russula emetica, Lact vellereus, Tylosp asterophora, Byssocorticium, Tomentella sp, Cenoc, Mortierella, Seba  
infrageneric relationships in *Cortinarius* ( Agaricales, Basidiomycota). Mycologia 96: 1042-1058.

**Cortinarius:** sisaldab endas Roz

rhizal Cortinarius species from tropical India and their phylogei Cortinariused Indias: pole omavah seotud, paikn nii subgen Cortinarius **Cortinariused** Indias: pole omavah s  
:st boundary. J **mullaorganismidega neutraalne tagasiside**

in Biotechnol. 19: 500-506.

ennius, Hyster. Cenoc proportsioon kasvas

üüpi N-ühendeid eri aegadel ja eri kaugusel märgistatud allikast, mis vastab eksploratsioonitüübile

ucture of the microbial communities in coniferous forest soils in relation to site fe **mikroorganismid: PLFA eri-okasmetsatüüpides: seened vs bakter** PCA

:t analysis of fungal communities in the complex environmental samples. Soil Bio **PCR otse mullast 18S rDNAle bändide rohkus**

pp, Setchelliogaster, Descomyces ja mõned kohalikud seened

ini

netic relationships of basal papilionoid legumes based on sequences of the chloroplast trnL intron. Syst. Bot. 26: 537-556.

**Papilionoideae:** Aldina sõsarperek C

and ecology in the tropics: perspectives from seasonally dry trop **kuivad troopilised metsad S-Am:** mitmekesised; kuna esinevad saarekestena, siis on kõrge e  
d speciation in neotropical seasonally dry forest plants. In: ??? **Caesalpiniaceae:** öietolm hiliskriidist, makrofossiilid paleotseenist. L-Am kuivade caatingade leguminoosid  
ion of species-rich biomes from dated plant phylogenies, neutral **taimekoosluste** struktuur ja selle põhjused üle maailma, eriti troopikas. L-Am-sse on paljud liigid üle mere :  
1598-1599.

ay-based detection of bacteria with 16S rRNA-targeting oligonucleotide probes. Appl. Environ. Microbiol. 69: 1 **16S rDNA: 16S rDNA:** 15-20 nu oligod; sama probe liitult  
93-200.

ruffles (Pezizales: Tuberales, Terfeziaceae) derived from nuclear rDNA sequen **Pezizales, Tuberales**

18S rDNA 2D struktu **SSU: Pezizales, Tuberales.** Chiro

lecular characterization of mycorrhizal fungi isolated from neotropical orchids in Brazil. Can. J. Bot. 83: 54-65.

dvantages of a Procrustean superimposition approach over the Mantel test. Oecologia 129: 169-178.

**Protest ja Procrustes**

le of site suitability, morphology and phylogeny versus species interactions. Oecologia 140: 352-360.

**co-occurrence anal. I**

es data matrices: estimation and comparison of fractions. Ecology 87: 2614-2625.

sts and savannas in southern Mexico. J. Biogeogr. 33: 438-447. **Mehhikos savannid** ja kuivad metsad on taksonoomiliselt üsna erineva koosseisuga vrd Aafrika süsteemide

tems with special reference to nutrient recycling in boreal forests. Proc. R. Soc. Lond. B. 268: 1329-1335

irect pathway provided by the mycorrhizal mycelial network. Plant, Cell Environ. 24: 1219-1226.

o tree seedlings via the vegetative mycelium of ectomycorrhizal plants. New Phytol. 145: 301-309.

dentification by searching sequence databases using mass spectrometry data. Electrophoresis 20: 3551-3567.

i from ericoid mycorrhizal roots. Mol. Ecol. 5: 123-131.

**RFLP, RAPD: erikoidse** mükoriisa jaoks

ErM seentel introni probleem

**Uus-Kaledoonia EcM taimed: Nothofagus ja Tristanopsis. Teisel alal Araukaaria** mägimetsas >860 müm Tristanopsis vaid AM. Kõigil taimedel sh Nothof VAM

nd substrates. Plant Soil 71: 345-351.

4: 277-278. **eritaimeteaduste webi-lingid**

emataceae. Mycol. Res. 111: 549-571.

**Pyronemataceae:** maasisesed VK tel

ronemataceae (Ascomycota, Pezizales) from California. Fung. Div. 28: 65-72.

**Chaetothiersia** gen nov kevadel

apping in ecosystems. Bioscience 39: 230-237.

s and other tales of positive feedback, redundancy and stability. In: ??? (eds). The ecology of mixed-species stands of trees. ???

id ecosystem stability during climate change: the belowground connection. Conserv. Biol. 4: 266-274.

mediation of competition between coniferous tree species. New Phytol. 112: 501-511.

reforestation: **arv et mükoriisade mitmekesisus** muudab seemikud tolerantsemaks eri keskkonningimustele

244. **kompleksökoloogia** eritasanditel: iseregulatsioon, tagasisidemed

communities. **mükoriisasümbioosi** tähtsus läbi aegade, teke, petmine

le J, Cheung F, Parvizi B, Tsai J, Quackenbush J. 2003. TIGR Gene Indices clustering tools (TGICL): a software system for fast clustering of large EST datasets. Bioinform

iversity perfor **taimede funktsionaalse BD** mõtmise üritus. Mõõdeti tohtu hulka tunnuseid, tehti neist 2-kaupa kombinatsioonid ning bootstrapi abil **taimede funktsionaalse I**

us spp

**morfot vs ECM** random RFLP: väga erinev, minimaalne kattuvus. Liigirikkaamad **proovist I juuretipp** random + rarefaction

vs N väetis

3 RE, varieeruvus

ITS polimorfism

Arcangeliiella ja Zelleromyces on La

lessis S, Chalot M, Podila G, Martin F. 2003. Analysis of expressed sequence tag ESTde võrdlus: Laccaria vs Pisolithus systems: desig mesokosmose uuringute usaldusväärsus

: enamuse eelistab aluselise pinnast ja vähest org sisaldust. V.a Pez badia happelisel pinnasel

stimul viljumist tuleasemeseentel Ascobolus pusillus, Fayodia maura, Trich hemisphaerioides, Lamprospora, Octospora, Pex endocarpoides, Pez praetervisa, Pez granulosa  
sidel: 4 suktessioonitaset: I Anthracobia spp -vaid lõkkeasemel, arv kasut kiiresti vabanenud toitaineid ja lagund juuri; II Ascobolus carbonarius, Geopyxis carbonaria (e  
metsades Taanis: 4-5 suktessioonitaset/gruppi: I Antaracobia spp 3-5 k peale põlemist; II Geopyxis, Peziza praetervisa, echinosp, trachycarpa, Rhizina , Pholiota; III Trich  
aa tuleasemel ja põlendikel: domin Tricharina gilva, Peziza praetervisa, Pez echinosp. Samad seemned mis Taanis. Geopyxis carbonaria esines tuleasemel koos Salix sp  
: osad kevadel (Tazetta ochracea, Helv acetabulum, Pez sp), teised sügisel

scules. McIlvainea 18: 22-28.

seeneliigid Põhja-poolkeral: eri

49: 440-452.

Kandseentel Sümpatrilisi mikroliike üllatavalt palju. Allopatrilistel liik liigikontseptsioonid ja nende sobivu:

ndendropsis. Mycotaxon. 45-65.

ican Collections. Mycologia 80: 571-576.

Clavulina ja Scytinopogon Ven

Heroni korallsaarel mood taimed peale Pisonia jt Nyctaginaceae AM. Pisonia metsas enamuse taimi NM.

ünktsioon tundmatu

kus korteksi rakud on sobivalt moonunud; mantlit pole, rakusis kolonis mõõdukas

ots, but not melting pots of genetic diversity. Science 300: 156: puudel geneetiline mitmekesisus suurem vahemere refuugiumides, eriti Sarapuu, valgepöök  
et. Roma 3: 43-50.

. Le Stazioni Esperimentali Agrarie Italiae 53: 24-31.

, virescens, chloroides, populnea, Lact volemus, piperatus, laricinus, Inocybe praetervisa, Boletus radicans, calopus, Cantharellus edulis, Lecc scab

ITA: Pinus, Abies, Larix, Fagus, Quercus, Betula, Populus, Tilia

ITA: Fagus, Corylus, Betula, Larix mood EcM

+ Betula: kirjeldused; Tuber melanosporum + Quercus obs.

Salix, Helianthemum, Bistorta vivipara, Arctostaphylos ja Vaccinium uliginosum mood EcM

Alpid. Salix, Helianthemum, Polygonum viviparum, Asrtostaphylos, Vaccinium uliginosum (vaid ühes kohas 1 tipp Cortinariusega) mood EcM

3G, Lemke PA (eds.). The Mycota VIIA. Systematics and Evolution. Pp. 257-281. Springer-Verlag, Berlin.

Pezizales-Helotiales-Rhytismales j

les (Ascomycota) with four genera. Mycol. Res. 112: 513-527.

sarnane ja sarnane ka nende mükoriisale

Genea, Humaria, Jafneadelphuse vilj

ics of voles and shrews for use in biodiversity monitoring studies, and evaluation of mitochondrial cytochrome o närilised ja i närilised ja putuktoidulised: morf eristamatud

hing mycorrhiza between the tropical bolete Phlebopus spongiosus and Citrus maxima. Mycoscience in press.

transport in woody roots of Sitka spruce and lodgepole pine. New Phytol. 85: 489-494.

is. Oecologia 127: 171-179.

: mixing models. Oecologia 130: 114-125.

a critique. Oecologia 127: 166-170.

e magnitude of EcM taimed vs AM taimed: EcM taimede risofääris palju suuremad erin vs bulk soiliga kui AM taimede risof: eriti N miner pot, fosfataaside aktiivsus. Ec

sts and fungi a mulla süsiniku akumul vähenev suurenenud CO2 keskkonnas, kuna risodeposiidid avhelduvad kiiremini ja EcM seemned vabastavad ni

eny and re-assessment of some Scleroderma spp. (Gasteromycetes). Ann. Jard. Bot. Madrid 66: S83-S91.

Scleroderma ITS: 3 suurt klaad

city and community composition of ectomycorrhizal fungi in a dry deciduous dipterocarp forest in Thailand. Biodiv. Conserv. 21: 2287-2298.

atkendlik HN, ulatuslik rakusisene kolonis; hüüfid tugevasti vakuol.

ycorrhizas: analytical strategies. In: Azcon-Aguilar C (ed.) Mycorrhizas - Functional Processes and Ecological Impact, pp. 155-164.

re paiknemine - enamik liikidel ruumiline autokorr 0.5 - 1.2 m piirides

ivironmental factors in an ectomycorrhizal symbiosis, and the pe EcM-Rhizopogoni efekt männile sõltub genotüübist ja on päritav, sõlti LRR - Log Response

cephala fortinii across a broad latitudinal transect in Canada. M Phialocephala fo ITS2

igal taxa from ericalean roots and their association with the roots of Rhododendron groenlandicum and Picea mariana in culture. Mycorrhiza 12: 175-180.

he northern lir harilik pärm: pohjasuunas levimine takistatud, sest kevadel tolmutorud ei joua valmida ja sügiseks viljad ei küpse.

ata; tüüpiline kottseene ultrastr

lry soils. New Phytol. 92: 513-517.

a sumave? Ceska Mykol. 19: 180-181.

Buchwaldoboletus (Phlebopus)

Buchwaldoboletus gen nov. Mi

fcFarlane E, Baker B, Molina R, Smith JE. 2007. Ecology and management of morels harvested from the forests of western North America. Gen. Tech. Rep. PNW-GTR-7

ty of morel mushrooms in healthy, burned, and insect-damaged forests of northea Morchella spp.

Morchella spp. Sisaldavad krüptilisi

odels. Available from http://cran.rproject.org/web/packages/nlme/.

ion, isolation and identification of Tuber melanosporum from old and new oak hosts in Israel. Mycol. Res. 104: 472-477.

f mycorrhizae during development of riparian forests along an unregulated river. Ecography 31: 245-253.

nism. BioSystems 6 : 153-164.

arv AM eellased ja kaasaegsete taimede eellased koloniseeri arv AM eellased ja kaasaegsete

ustralaasias ja ümb regioonides: parasiidid ja sümbiondid er. N seened Australaasias ja ümb regioonides: parasiidid ja sümbiondid er. Nothofagusel aitavad mõista biogeo

piaryExplorer: visualizing large phylogenetic trees with environmental metadata. Bioinformatics 27:3067-3069.

TopiaryE TopiaryExplorer: IT

n rainforest. Phil. Trans. R. Soc. Lond. B 359: 1573-1583.

Ida-Aafrika vihmametsade areng. Aafrikas väiksem B ja G-BD kui S-Am ja SE Aasias. Hiliskriidist paleog

iber melanospor Tuber melanosporum parasiteerib mitte-peremeestaimedel: Antho: immunoblot, ELISA trüüvile taimejuures

l fungal genomes. Trends Genet. 27:14-22.

5: 21-31.

SSCP markerite leidmine mändidel

work of ecolo ökoloogilised võrgustikud üle mitmete troofiliste tasemete, ent taimedele tsentreeritud: struktuurne keerukus ei taga stabiilsust. Kriitili

a kirjeldus: viljakehad kasvavad välja otse ECMst; juure struktuur häviv. Eriti cenococcumil

is MJ. 2002. Fungal gene expression in early symbiotic interactions between *Laccaria bicolor* and red pine. *Plant Soil* 244: 11 **Laccaria bicolor** geeniekspressioon ECM tekl

l. *Biotechnol.* 57: 20-33. **ligninaasi** Network analüüsi be

pecies interaction networks. *Ecol. Lett.* 15: 1353-1361.

tification of differentially expressed cDNA clones in *Tilia platyphyllos*-Tuber bo **cDNA raamatukogu** tegemine **vähene mRNA** sisaldus

forest in Con **Nothofagus mägede kõrgemates paikades ei vaja** regen-ks suuri häiringuid, arv sest puuduvad Lauraceae varjutajad

nen M, Wang P-H, Matsuda Y, Naadel T, Kennedy PG, Kõljalg U, Tedersoo L. 2013. Biogeography of ectomycorrhizal fungi associated with alders (*Alnus* spp.) in relatic

lid A, Hågström Å. 2007. Global patterns of diversity and community structure in marine bacterioplankton. *Mol. Ecol.* 16: 867-880.

2 others. 2007. Global patterns of diversity and community stru **latituudi gradient** merebakteritel - just nagu teistel org-del

food web of s **13C ja 15N toiduahelas mullas: d13C sama, d15N** kasvab ahelas ylespoole; kõik solub vaga palju kohapealsest varise 15N vaartustest; 15N prop kasvab sy

**sylvestris-Lactarius rufus ectomycorrhizas and their effect on mycorrhiza format** bakterite 16SrDNA **ANOVA** **B. ensüüm**

al isolates belonging to AG-6 and AG-12 of the *Rhizoctonia solani* species complex. *Mycologia* 93: 712-719. **Rhizoctonia** AG-6 ja AG-12 sisald r

all DH. 2003. **taimede BD vs mullaloomade BD looduslik** rohu maadel. Taimede BD ei mõj nematoodide, algloomade BD ega bakterite PLFA-sid.

ty and effects on seed germination and plant growth. *Mycologia* 99: 510-525. **praimerid ITS Ceratobas ja Tulasnellale**

008. Novel Root Fungal Consortium Associated with a Dominant Desert Grass. *Appl. Environ. Microbiol.* 74: 2805-2813.

ppropriate for classifying internal transcribed spacer (ITS) metagenomic amplicons? *New Phytol.* In press. **BLAST-põhised mee**

l *Saccharomycotina* ja *Taphrinomycotina* vahepeal **mullaseened: kõikjal mullas sage ko**

ntario Tsuga, EmH: 185 liiki kandseeni mullast; domin Agaricales; 57-65% liikidest mood EcM; väidet. Annavad EmH vs viljakehade uuringud e

s: Advantages of Akaike information criterion and Bayesian approaches over likelihood ratio tests. *Syst. Biol.* 53: 793-808. **Akaike informatsiooni kriteerium on**

distic analysis of the geographical distribution of genetic haplotypes. *Mol. Ecol.* 9: 487-488. **fülogeograafia** -Geodis.

n. *Bioinformatics* 14: 817-818. **MODELTEST**

orks. *Trends Ecol. Evol.* 16: 37-45. **ülevaade eri fülogeneesikäsitlustest 1**

253-1256. **jModel Test: mude jModel Test: mudelite valik. Si**

s and assumptions. *Ecology* 83: 703-718.

ular mycorrhizal, fine endophytic and dark septate fungi across a pH gradient in acid beech forests. *Soil Biol. Biochem.* 39: 400-408.

'-89. **Rosaceae: Photinia** lähim sugulane c

rtson KR, Arsenault M, Dickinson TA, Campbell CS. 2007. Phylogeny and classification of Rosaceae. *Plant Syst. Evol.* 266: 5-43.

and biogeogra **võrdlev analüüs ja biogeo parasiitidel: fülogneet** signaal mitmel tasemel, uuritava või seletava tunnusena; karpude nish ja levila kasvab

hic space. Tre **peremehespetsiifika parasiitidel: erinevad** indeksid ja terminid geogr ja fülogneet asjaolude jaoks;

is. Parasitolog; fülogeneetiline sarnasus peremeeskaladel suguk sisese mõjutab parasiitusside esinemist (Monogenea ja Trematoda, ent mitte Cestode

rm operational approaches in producing ecologically relevant fungal species inventories. *Mol. Ecol.* 20: 655-666.

logenetic trait conservatism and the evolution of functional trade-offs in arbuscular mycorrhizal fungi. *Proc. R. Soc. B* 276: 4237-4245.

182-184. **keystone-liikide uuem kontsept ja diskussioonid**

ublilacina **klasterdamine järk-jä**

ased clustering: using ecology to refine the Operational Taxonomic Unit. *Appl. Environ. Microbiol.* 79: 6593-6603.

**e-tuning of carbon gain by two partially myco-heterotrophic orchids.** *Proc. R. Soc. Lond. B* 277: 1333-1336.

litter and soil **puuliikide varis mõj seenekooslusi, eriti F-horisondis.** Home vs. Away - viimases madalam lagunemiskiirus

few *Phytol.* 16 **parasiitsete taimede mõju peremeestaimedele, kooslustele jm organismidele.** PEAB arvestama parasiitidega, tehes toitainete analüüsi. PAR vähe, ent liigub l

e carbon flux **Hemiparasiit Striga spp** saavad 28-35 protsenti C oma peremehelt

nutrient poor **hemiparasiidid: kõrgem toitainete konts tänu suuremale resp-le, mõj taimede maapealset konkurentsi ja suurendavad BD tänu koguprod inh-le.** Arv toitainete

s a range of host responses in the rhizoids of leafy liverworts: an experimental and cytological analysis. *Fieldiana* 47: 59-72.

/ functional diversity using sole-carbon-source utilisation profiles -a critique. *FEMS Microbiol. Ecol.* 42: 1-14.

Munch J-C. 2) põua mõju Saksamaa pöõgi-kuuse segametsades **FastTree - FastTree - kiire NJ**

n trees with profiles instead of a distance matrix. *Mol. Biol. Evol.* 26: 1641-1650. **Gnetales sõsarühm katteseemnetain**

lar evidence. *Int. J. Plant. Sci.* 157: S40-S49. **Gnetum: iseseisvad alamperekonad põhja- ja lõunapoolkeral**

mita phalloides was introduced and is expanding its range on the **Amanita Phall** IGSil palju koopiaid

rhizal symbio **invasiivsus: mükoriisa roll taimede invasiivsus** - invasiivsed taimed pms NM või väikese kasvufektiga. Paljud suruvad kohalikku n

?: 1-9.

biogeography and invasion biology of the death cap mushroom / *Amanita phalloides*: looduslik biogeo ja introduts. Am, AUS, Probleem liigikontsepts, leiuandmete usaldus

l, Schaminee J **Fül klasterdunud taimekooslustes on suurem f-naalne mitmekesisus kui mitteklasterdunud kooslustes h. Fül klasterdunud taimekoosluste**

n and identification of *Alnus acuminata* ectomycorrhizae from Argentinean alder stands using anatomical characterization and ITS-sequence analysis. *Mycologia* 102: 126

**pikus: väike** **5 RE, mustri sarnasuse järgi perekondade eristamine**

n M, Egli S, Ernst J, Fraissinet-Tachet L, Kuhar F, Legname E, Marmeisse R, Müller A, Nikolova P, Peter M, Plassard C, Richard F, Schloter M, Selse M-A, **standard**

neral nutrients from soil organic matter. *Ann. For. Sci.* 68: 25-32.

**Alnirhiza cystidiobrunnea: v sarnane Th terrestrisele ja T sublilacinal**

2004. A rapid and highly sensitive method for measuring enzyme activities in single mycorrhizal tips using 4-methylumbelliferone-labelled fluorogenic substrates in a micro

Schwarzerle (*Alnus glutinosa* (L.) Gaertn.). PhD Thesis. University of Tübingen. **Lepa-Ec**

llatüübil, Chytridiomycota teisel mullatüübil. Mõjur arv N

2007. A phylogenetic evaluation of whether endophytes become saprotrophs at host senescence. *Microb. Ecol.* 53: 579-590.

IL, Green LE, **ökoloogia teooria kehtib väga paljuski ka** bakteritel. Arvestada tuleb, et bakterid asex organismid.

oöl 244: 9-17. **viited, lühitülevaade** kõigist mol ja FA meetoditest, probleemid

quality checked and aligned ribosomal RNA sequence data compatible with ARB. *Nucl. Ac. Res.* 35: 7188-7196. **T-RFLP tippe ja DGGE b: T-RFLP tippe ja DGGE bänd replikatsioon ja korr:**

i, muudest domin Tom ellisii, v palju teisi tomentella-thelephora, Tuberi ja Scleroderma liike

*Puccinia sorghi*. *Can. J. Bot.* 65: 1380-2383.

ocum, *Laccaria amethystina*. *Tomentella* ja *Cortinari* küllalt liigirikkad

Discovery for primary species delimitation. Mol. Ecol. 21: 1864–1877. **Barcoding gap leidmine** paariviisilise distantansi põhjal ar **Barcoding gap** leidm

ius spp, Tomentella, Laccaria

files, and microhabitat structure in Sierra Nevada old-growth habitat. Can. J. For. Res. 32: 1016-1024.

gradients revisited. Glob. Ecol. Biogeogr. 22: 659–670.

globally consistent relationship that precludes region effects. Ar **regionaalne efekt** on taimekoosluste taksonirikkuse määramisel tugevam kui laiuskraad. En:

rsity of temperate plants. Nature 407: 180-182. **Aasias suurem sama perek taime** BD kui N-Ameerikas, sest heterogeenne kk, palju refuugieme, väiksem

nts and terrest **taimedel ja maismaalooma rühmadel esine** taimedel ja maismaalooma rühmadel esineb terav diversiteedigradient laiuskraadi järgi. See

togeographical patterns in East Asia in relation to latitudinal and **Ida-aasias on alla 30° laiused** palju taimeperekonna-rikkamad kui ylevall pool

iversity along latitudinal and elevational gradients. Science 335: **beta-BD on globaalselt** ja N-Am puude andmetel tugevasti negatiivselt seotud laiusesega

rth America. Glob. Ecol. Biogeogr. 18: 327–332.

ntagonistic microfungi populations and their potential interactions in the mycorrhizosphere of Norway spruce (*Picea abies* (L.) Karst.) and beech (*Fagus sylvatica* L.) on aci

tic basidiomycete with an exceptionally large plant host range. Mol. Plant Pathol. In press.

net. 32: S496-S501. **cDNA arrayde transf** **cDNA arrayde transform**

ryptic speciation in *Hymenoscyphus albidus*. For. Path. 41: 133–142.

l temporal dynamics of a community of the tree-root endophyte *Phialocephala fortinii* s.l. New Phytol. 168: 651–660.

geographical pattern for a root-associated fungal species complex. **Phialocephala**: kõik dominantsed liigid levinud kogu Põhja-Poolkeral; Sveits liigirikkaim al

fer from oaks **tpoud: tamme süvajuured votavad vaid öösiti vett** üles ja translokeerivad seda vaid AM ja ECM seente, mitte parasiitide hüüfidesse. Translokatsioon palju ef

zosphere hyph **rohumaadel tammedeta mulla ülakihid kuivavad** palju kiiremini läbi ja hüüfid surevad vrd tammesavanniga. Arv hüdrauliline veevarustus selle taga.

**tammel Cali tammel Californias: kuiv vs niiske a; nõgu** vs kuiv küngas: AM domin kuival aastal kuivas kasvukohas; ECM seentel ja AM-seentel (p

ey on root colonization, growth, and nutrient uptake of aspen and balsam poplar. Biomass Bioen. 32: 381-391.

d species 5 years after nursery inoculation in the Canadian Prairie Provinces. New For. 35: 235-253.

and ectomycorrhizal development of black spruce seedlings. ???

velopment of container-grown *Picea mariana* seedlings in response to exponential nutrient loading. Can. J. For. Res. 30: 191-201. **vektoranalüüs**

omputing. R Foundation for Statistical Computing, Vienna, Austria. Available from <http://www.R-project.org/>.

tool in microbial ecology. Nature 403: 646-649. **substraadi rikastamine** 13C-ga **substraadi rikastamine** 13C-ga, 13C inkorporatsioon DNA:

ids: a window to the function of uncultured microorganisms. Curr. Opin. Biotechnol. 14: 296-302. **13C kasutamine** mikroobide funktsionaalsetes uuringutes

ecologically important microbes by rep-PCR genomic fingerprinting. In: Akkermans ADL, van Elsas JD, de Bruijn FJ (ed.). Molecular microbial ecology manual, v3.4.3.

d ecology thro **ookeanides Ameerika ümber funktsionaa** **ookeanides Ameerika ümber funktsionaalne metagenoomi-põhine BD** on tipuga 20\*N ja kc

ness. Proc. Natl. Acad. Sci. 98: 4534-4539. **Lõuna-Am lindudel: 1\* ruutude kaupa: BD kasvab koos topogr heterogeensusega, sademete**

**Costa Rica pilvemetsade epifüütidel, esines sageli ka seenmantel -eriti maapinnal kasvavatel ning epifüütsetel veidi kuivemates tingimustes, DSE kuivemates, AM kõikjal**

uccession of active fungi during the decay of Norway spruce logs. Fung. Ecol. 4: **RNA ITSst ja 18S**-st võimaldab identifitseerida aktiivset kooslust

lgul domin va-mä *Phellinus* spp; ECM seened (*Lact* tabidus, Russ, *Piloderma*, *Tylospora*) mood 10% järjestustest II st. kuni 60% V st. VK arvukus

ycotaxon 54: 427-453. **ARG Nothofagus torikud: Post**

**kari Uapaca 3** metsa, sh Isoala. Domin *Boletus* s.l., *Russula-Lact*, *Amanita*, *Cantharellus*

ce and environmental heterogeneity in a patchy ecosystem. Proc **bakteri Burkholderia ambifaria** isolaatide genoomide sarnasuse ruumiline autokorr ulatub ki

l. 62: 142-160. **ordinatsioonid** ja **Mante**

origin of Orchidaceae from a fossil orchid with its pollinator. Nature 448: 1042-1045. **Orhideede** minim. Tekkeag 76-84 **M**

cea (Pinaceae): implications for phylogeographical studies using **Picea: tek Põhja-**Ameerikas ja väh viis mandritevah levikut. Aasia kaudu levis ka Euroopasse

nal tool for spatial analysis in macroecology and biogeography. Glob. Ecol. Biogeogr. 15: 321-327. **Ruumilise varieeruvuse**

**bakterite (IGS) ja seente (ITS) ARISA=ARDRA.** Sekveneerimise polyakrylamiidigeel. K

species and their nutrient uptake in gypsum mine spoil in India. Appl. Soil Ecol. 17: 279–284.

lture of *Cortinarius orellanus*. Trans. Br. Mycol. Soc. 89: 41-44. **ECM seer**

some ectomycorrhizal fungi. Mycol. Res. 96: 971-976.

agous life style. Oikos 118: 334-345.

y technique and its application in terrestrial orchids. Am. J. Bot. 80: 1374-1378.

ion of *Tipularia discolor* (Orchidaceae). Am. J. Bot. 85: 829-834.

studies of terrestrial orchid populations. Bot. J. Linn. Soc. 126: 49-64.

**ia eri metsades** saproobid ja lehk-EcM seened 7 a jooksul: domin *Cortinarius* s.l., Russ+Lact; *Amanita*

he Barcode Index Number (BIN) system. PLoS One 8:e66213. **Liikidele ja OTUdele geneetilis**

ogy. Wiley: Chichester, UK.

and epigenetic instability in mycelial systems. Can. J. Bot. 73: 1241 – 1248.

n processes in **ekto- ja erikoidse MR seentel oluline roll tundra-**ja boreaalse vöötme C ja N ringes. Omastavad eelistatult aminohappeid mineraalse N üh asemel ja suudavad

mation of the ectotrophic mycorrhizal sheath in conifer seedlings. New Phytol. 71: 49-53.

ciations in 'lower' land plants. Phil. Trans. R. Soc. Lond. B 355: 815-831.

a journey towards relevance. New Phytol. 157: 475–492.

emasolu sõltub **Ericales: erikoidne, arbutoidne, monotropoidne MR.** **Pyrolatel mantli olemasolu sõltub mullast; Kõik Pyrolaceae liigid on seotud EcM taimedega; Ei ole õnn**

yy. Soc. Edinb **luidete arenemine. N-limit faktor.** Vajadus mükoriisa järgi suureneb. Eri kk-des eri tüübid. *Pyrola* rotundif ssp maritima, *Monotropa*: esinevad luidete vahel **r**

Hill RS, Read *Nothofagus* *Australias*: ülevaade

. Ecol. 76: 558 **Tasmaania vihmametsad: Nothofagus regener pidevalt, ent okaspuud vajavad suuri gäppe**

pecies of *Nothofagus* strateegiad: varjukartlikud, samas ruderaalsed, ent ka troopikametsade dominandid, ECM polearvestatud

s of some mon **Nothofaguse monodominantsed ja segametsadel Nothofaguse monodominantsed ja segametsadel** pole olulist vahet puude koosluses. Kus on palju Nothofag a contortipes, the Rosetta Stone of a mycoparasitic agaric genus. Can. J. Bot. 72: 1812-1824. **Kamerunist** kortikoidid, sh Tom radi igiline koosseis sarnasem lähemal asuvates. Järvest vaid 1 proov **bakterite BD** suurem suuremates Hisp mägijärvedes; liigiline koosseis sarnasem lähemal asuvates. Järvest host species **Casuarinaceae: EcM ja noodulite teke sõltub v palju Casuarina ja Allocasuarina** liigist ning mullaomadustest. Allocasuarinal esineb EcM sagemini kui Casu JS eukalüpti hõredates metsades: Boletoidid (19) Russ/Lact (15) **Põhja-AUS: eukalüpti hõredad metsad: basaalpinnalt domin EcM puud, juurtel 24-55% EcM kolonis ja 6-2 Queensland apogeotroofsete juurte funktsioon on arv hingamine, stemflow ära kasutamine, läbi mükoriisade kõrgvee ajal toitainete omastamine** (ginata) in litter **varise tüüp mõjutab EcM mood: Banksia lehekõdul ei mood, ent eukalüpti ja akaatsia kõdul moodustab. Cenoc ja Hysterangium levinud mineraalmullas, val EcM taimed AUS kaevanduspinnasel: Allosyncarpia, Asteromyrtus (Myrt), Erythrophloeum (Caesalp., mantel 1-2 kihti, HN pole; Aafrikas VAM), Jacksonia (Legumin, M izzal fungi. Soil Biol. Biochem. 23: 767-774.**

**Casuarina cunninghminia** Queenslandis vaid AM. Üleujutatud aladel mood klasterjuuri

Pinus patula se **Laccaria ja Thelephora koinokuleerimine oli 12 kuud hiljem parem kui kumbki seen eraldi voi kontroll. Parem igal juhul steriliseeritud agropinnasel. Theleph** cience 289: 1920-1921. **Glomales** fossiil 460-455 MAT (enn izzal fungi (Glomales). Mol. Phyl. Evol. 14: 276-284. **AM-spec praimerid, AM-seen AM-spec praimerid, k AM-seened; morfoloogia ja SSU sel sporocarp-forming species of glomeromycotan fungi in the Diversisporales lineage. Mycol. Progr. 6: 35-44. Glomeromycota: uue haru kirjeldus al fungi): recent developments and new gene markers. Mycologia 98: 885-895. AM seentel mt LSU** homogeenne ja paljulubav süste **Glomeromycota: Geosiphon on arv. An evidence-based consensus for the classification of arbuscular mycorrhizal fungi (Glomeromycota). Mycorrhiza 23: 515-531. Glomeromycota taksonoomia nthogalactus, Russula cremicolor and Amanita francheti in late-stage ectomycorrh AFLP + elektroferogramm**id **sarnasusindeksite jaotus** l fungi. Plant Soil 244: 64-73. **SSU AM-seened; ülevaade SSU fülogene** rhyllosphere: geographic and phylogenetic variability in the dist **baktritest endofüütidel: tähtsam peremeestaime hõimkond kui geogr kaugus fülogene BDle. Afzelia ja Brachysetia mood EcM Nigeerias**

**anada and its biological status. Can. J. Bot. 64: 1249-1254. n. J. Bot. 67: 3003-3062. ciated with a superficial fairy ring. Can. J. Bot. 59: 410-414. ia ; 3, on Neolecta . Mycologia 71: 1248-1253.**

parasitism: who controls the outcome, host or invader? New Phytol. 151: 705-716.

ance generated by plant/fungal symbiosis. Science 298: 1581.

studies of the euascomycetes (Pezizomycotina, Fungi) with special emphasis on LSU, SSU, RPB2 **kottseened, er liheniseerunud ja poi** 729-735.

as of the Indian Ocean and reconnecting continental shear zones **Gondwana lagunemise kronoloogia. India uuendused** d EF1-a sequences: evidence for cryptic diversification and links to *Cordyceps* teleomorphs. Mycologia 97: 84-98.

gonucleotide microarray to characterize ectomycorrhizal fungal communities. BMC Microbiol. 9: 241. **EcM seentele: chipil mitteolevaid liike**

over J, Chadwick OA, Hale CM, Tjoelker MG. 2005. Linking litter calcium, earthworms and soil properties: a common garden test with 14 tree species. Ecol. Lett. 8: 811-12. Impacts of **Liigirikkuuse mõju funktsionaalsusele ja bipomassile tüüsub aastatega ja näiline esialgne redundantsus org vahel väheneb**

association of **l valgus: varjukartlikud liigid kasvavad kiiremini ka varjus kui varjutaluvad muid aeglased liigid; ruderaalsel väikeseseemnelistel puudel algne kasv aeglaser** al pole ühtki natiivset EcM-seent. Sünonüümiprobleem

Africa. Contributions from the Bolus Herbarium.No.7. **ligniiniilag**

phora terrestris. In: Hacskaylo E (ed. ). Mycorrhizae. USDA Forest Service: Washington USA. pp. 222-227.

athogens and i **invasiivse Prunus liigi** **invasiivne asurkond Eur-s seotud vähem patogeensete Pythium tüvedega kui Am-s** hiza: integrating evolutionary history and plant traits. Ecol. Lett. 15: 689-695.

**radikal rühm kuloidne ECM (???)**

. Dreyfus B, D **Acacia Austraaliast** **introtutseeritud ja eriti** kui veel nakatatud Pisolithus albusega, mõjutab mikroobikooslusi ja -aktiivsust, mulla toit tes as potential vectors for soil microfungi: study of mite-associated fungal species. Microb. Ecol. 50: 518-528.

Atherospermataceae (Laurales): evidence from coding and non **Atherospermataceae** Lõuna-poolkeral. On Nothofaguse matsade alustaimestikust pea kõikjal. Sugukond tek ts. Int. J. Plant Sci. 165: S23-S33.

ts. Trends Plant Sci. 10: 550-558. **Gnetales biogeo** illustr.; molekulaarsete relaxseeritud kellade kasutamine ajaloolises biogeos

nder ES, Mitzenmacher M, Sabeti PC. 2011. Detecting novel associations in large data sets. Science 334: 1518-1524. **MIC: Maximal Infor** est tom-thel, inoc, amph-tyl

and plant con **niidutaimed koloniseerivad neile omasemaid sub**stradaalike. Eritaimede elupaigas erinev mikroobne aktiivsus, N sisaldus and phylogeny on the nested structure of mutualistic networks. Oikos 116: 1919-1929.

a coextinctions **Network-anal: väljasuremised on mittejuhuslikud; fülog ja ökol distant on tugevasti korreleeritud networkis tolmeldajate vahel; loom:** yxotrichoid hyphomycete, Oidiodendron maius. Mycol. Res. 106: 1463-1467. **Oidiodendron maius: toodab turbapa** ialocephala dimorphospora ). Can. J. Bot. 51: 2247-2248. **MRA vanad kultuurid (Melini**

ns; Tomentella sp; maasikapuu: Cenoc, Tomentella, Inocybe tigrina; suguk kaup: **ITS1F-4; RFLP liig**isene varieeruvus olematu v a seal kus ennegi kahtlustatud krüptilisi **Quercus ilex-Arbutus: 4 a jooksul Domin Laccaria laccata, Lact chrysothrix, Inocybe tigrina. Liigirikkaid perek Russulaceae, Cortinarius s.l., Amanita, Inocybe. Väga :** i aastaaeg kui ka põua indukts; aastaaeg eriti põuastel plottidel. Aastati võisid kevad vs talv mõjud olla v erinevad - ilma sesoonse muutritra

sions - the rol **taimede** **invasiivsus ja invasiooni seosed mutualistidega: Ficus-liblikas parimini uuritud; introtuts. Liikidel võib spetsiifilisus muutud:** Naturalization **invas sõnastiku definits: invasiivne - kui levib ise >100 m eemale v >6m 3 a jooksul; naturalization, aliens, transformers, weeds** d predictive fr **invasiivsed paljasseemnetaimed - pea eranditult Pinaceae ja Araucariaceae-Podocarpaceae; teistest paistavad andmete põhjal olulisel k** well do we unc **invasiivsed liigid RSAs: Pinus spp, Acacia spp, Populus spp jpt**

**sissetoodud metsanduseliikide omadused: parem puit, kiirem kasv, lihtsam majandamine, seemnete/seemikute saadavus, suurem resist** ic analysis of Rhamnaceae using rbcL and trnL-F plastid DNA s **Rhamnaceae: EcM Austraalia Rhamnaceae-Pomadereae (sh Pomader)** **Rhamnaceae: EcM Austraalia Rham** richness values. Insect Conserv. Div. 1: 135-141.

ings inoculated with mycelial slurries of ectomycorrhizal fungi. New Forest. 3: 247-258.

irjeldused Langemannia gigantea, Lygoperdon ja Tapinella atrotomentosa ei mood EcM

osa) **mycorrhizoplane-associated actinomycetes on in vitro growth of ectomycorrhizal fungi. Plant Soil 115: 109-116.**

lobal Ecol. Biogeogr. 11: 353-361. **saarte biogeograafia** edasiarendus väikeste antillide ja lindude näitel: levimine>kolon>nishid>ekstinktsioon

Evolution 48: **taimesuguk vanuse ja liikide arvu vahel pos seos**; suguk vanuse mõõtmine esmaleidude põhjal fossiilidena on ebakorrekne. Liigirikkus es. In: Ricklefs: **lokaalne BD sõltub regionaalsest BD-st (ränne)**. lokaalne BD sõltub regionaalsest BD-st (ränne). Liikide vahetus lokaalsete paikade vahel on asümm, sõltub ecol. Lett. 7: 1: **globaalsetes liigirikkusmuustrites on lokaal globaalsetes liigirikkusmuustrites on lokaalsed ja regionaalsed tasemed väga tihedasti seotud** nment relationship. Ecology 87: S3-S13.

**Frankia IGS primer F16S** ggggaccgcccattgggac

species, from New Zealand (Fungi, Agaricales, Amanitaceae). Aust. Syst. Bot. 6: 155-159.

**Limacella** spp. NZL: Podocarpaceae

ional scale and possible speciation in *Sebacina epigaea* and *S. incrustans*. BMC Evol. Biol. 13:102.

st refuges in Gabon: Preliminary results. Bull. Mus. natl. Hist. nat. **Gaboni ja Kameruni lääneosa metsad, eti Montsde Cristal on tähtsad vihmametsa refuugiun** f artificially inoculated Ponderosa and Scots pine in a greenhouse and plantation. For. Sci. 28: 646-660.

d. ). Mycorrhizae. USDA Forest Service: Washington USA. pp. 97-113.

**Cystodem**

rrhizal infection on the rhizosphere pH around roots of maritime pine (*Pinus pinaster*). New Phytol. 130: 141-147.

ensive sampling of basidiomycete genomes demonstrates inadequacy of the white rot/brown rot paradigm for wood decay fungi. Proc. Natl. Acad. Sci. USA 111: 9923-9927.

th, glomalin, and soil aggregate stability in semiarid Mediterranean steppes. Soil Biol. Biochem. 35: 1257-1260.

1-53.

**glomaliin:**

1: van der Heij **taimed, mükoriisaseened vs globaalset muutus**: ülevaade

arating the wheat from the chaff. Fung. Div. 33: 1-45.

llings with seven ectomycorrhizal fungi. Mycorrhiza Online

sis Mill. with selected ectomycorrhizal fungi improves seedling establishment 2 years after planting in a degraded gypsum soil. Mycorrhiza 18: 23-32.

Mõne liigi ohtrus muutus (Lact delic vähenes)

to measure iron mobilization and oxalate secretion by ectomycorrhizal tree roots. Soil Biol. Biochem. IN PRESS

**oksalaat:**

as a case study of functional diversity and functional redundancy. Ann. For. Sci. 68: 69-80.

mycorrhizal communities through specialized fungal symbionts? Mycorrhiza 19: 493-500.

A. 2013. Carbon availability triggers the decomposition of plant litter and assimilation of nitrogen by an ectomycorrhizal fungus. ISME J. 7: 2010-2022.

**Guineas EcM** taimed: Afzelia spp, Anthonotha spp, Cryptosepalum, Gilbertiodendron, Paramacrolobium, Pellegriniodendron, Uapaca spp

**Guinea EcM** puud Afzelia, Cryptosepalum, Pellegriniodendron, Paramacrolobium, Anthonotha, Gilbertiodendron, Uapaca 5 spp

**idiomycete Russula subsect Foetentinae populations in a primary dipterocarp forest.** Mycorrhiza 16: 143-148.

al communities: **eksootiliste patogeensete seente introduktioon**: näidisliigid, nende päritolu, kahju jms. Nii munasseened, kottseened kui roosteseened. Tingimused epideemi peraceae) based on ITS and trnT-L-F region sequences. Syst. Bot. 26: 318-341.

**Kobresia** on pisike rühm perek Care  
**Ceratobasidium** obscurum on tegelt  
klavarioidsed seemed Korupist

interpreted as an orchid associate. Mycol. Res. 102: 1074-1076.

54: 517-539.

55: 803-842.

vation Area at Kew. Kew Bull. 56: 761-762.

**Amphinema angustispora** sp nc  
**Tulasnella**, Thanatephorus jt he

Bull. 56: 163-187.

ecology 68: 744 **geostatistika autokorrelatsiooni korral**

**geostatistika** autokorrel

development of mycorrhizal roots and its significance for experimental studies. QQQ 253-283.

irikkus sama, koosluse koosseis erinev

il rotifer communities are extremely diverse globally but spatially autocorrelated locally. Proc. Natl. Acad. Sci. USA 108: 4406-4410.

**keriloomade** ruumili

1:341-353.

plants linked by a common mycorrhizal network. J. Experim. Bot. 50: 9-13.

ol. 16: 153-162.

**seened AUS** -samad v sarn EUR omadega

siuksessioonis 5a jooksul pärast põlengut

rius (19), Inocybe (12), Clavulina (6), Russ-Lact )6) Amanita (5), Ramaria (4), Boletaceae (4); va palju Pezizaleseid

st specialization in three mushroom-forming genera of Alnus-as: **lepaseentel Lactarius**, Alpova ja Alnicola - paljud liigid spet **lepaseentel Lactarius**, Alpova ja

Ley P. 2010. Marine nematode taxonomy in the age of DNA: the present and future molecular tools to assess the nematodid ITS peetakse ebasobivaks kuna indity and functional roles. New Phytol. 182: 314-330.

elt-down in a plant-bacteria mutualism? J. Biogeogr. 37: 1611-1622.

mycorrhizal fungi drives plant growth and intraspecific fungal coexistence. ISME J. 7: 2137-2146.

rjalä K, Hahtela K. 2000. Means to improve the effect of in situ bioremediation of contaminated soil: an overview of novel approaches. Environ. Poll. 107: 179-185.

ot. Tidskr. 15: 204-213.

:530.

ms of mycotrophy. Svensk Bot. Tidskr. 32: 90-99.

der mixed models. Bioinformatics 19: 1572-1574.

**MrBayes 3: MrBayes 3:** baieesia tüü

, Liu L, Suchard MA, Huelsenbeck JP. 2012. MrBayes 3.2: efficient Bayesian phylogenetic inference and model choice across a large model space. Syst. Biol. 61: 539-547.

Birth and death of a concerted evolution paradigm. Proc. Natl. Acad. Sci. 102: 5084-5089.

**5S rDNA** paikneb seentel jt organismidel paljude koopiata

: BD, näiline suur erinevus, ebapiisav proovivõtt

**Praimerid: Viaud2000** kottseened troopikas termidukihulates vs mullas: kõrge BD, näiline

f ascomycete fungi have drag-minimizing shapes. Proc. Natl. Acad. Sci. USA 105: 20583-20588.

Host plant variability and heritability of ectomycorrhizal and root traits. New Phytol. 126: 105-110.

Fungal variability and heritability of ectomycorrhizal traits. New Phytol. 126: 111-117.

on the growth and colonization of mycorrhizal fungi. J. Chem. Ecol. 9: 1153-1162.

**USA, ENG, JPN: Alnus, Myrica, Shepherdia (Elaeagnaceae) mood EcM ja AM; Dryas ja Comptonia mood vaid EcM. Protokoll mõeldud AM tuv** rizedal fungi. New Phytol. 178: 253-266.

ffect on fine-root and leaf morphology in a silver birch forest chronosequence. Eur. J. For. Res. 132: 219-230.

ss.

n function posterior probabilities. Bioinformatics ????: 1-6.

**Probalign:** efektiivne ar

James TY. 2011. Archaeorhizomycetes: unearthing an ancient class of ubiquitous soil fungi. *Science* 333: 876-879. Archaeorhizomycetes = SCGI;

Piloderma spp. Nii O kui C

and mycelium colonising different mineral substrates. *New Phytol.* 162: 795–802.

to acidification of ectomycorrhizal fungi in response to different minerals. *FEMS Microbiol. Ecol.* 1583: 1-7. eriseened

phae in Terfezia. *Antonie van Leeuwenhoek* 85: 165–168.

1999. Phylogenetic relationships between European and Chinese truffles based on **Tuberaceae: ITS1F-4** **Tuber aestivum**-pikk; **Tuberaceae**: 3 põhiklaadi

liikide kooseksist hüpotees: keskmise häirimise teooria: liigid püsivad koos tänu häiringutele teat aja tagant. See võimaldab ruderaalidel levida ja C-strateegi

lence from population genetics that the ectomycorrhizal basidiomycete *Laccaria amethystina* is an actual multihost symbiont. *Mol. Ecol.* 17: 2825-2838.

erotropic orchids from Thailand tropical forests associate with a broad diversity of ectomycorrhizal fungi. *BMC Biol.* 7: 51.

I-A. 2009. Ectomycorrhizal *Inocybe* species associate with the mycoheterotrophic orchid *Epipogium aphyllum* but not its asexual propagules. *Ann. Bot.* 104: 595-610.

or the revegetation and remediation of contaminated ecosystems. *Can. J. Bot.* 85: 237-251.

ization of polymorphic microsatellite loci in white truffle (*Tuber magnatum*). *Mol. SCAR praimerite konstrueerimine AFLP ja minisatellit-probede ning sekveneerimise põhj*

F. 2011. The AD-type ectomycorrhizas, one of the most common morphotypes present in truffle fields, result from fungi belonging to the *Trichophaea woolhopeia* species

osporum: mating type distribution in a natural plantation and dynamics of strains of different mating types on the roots of nursery-inoculated host plants. *New Phytol.* 189:

ti 1 ja 2 a seas, 3 a vähem

*involutus* strains in relation to their IAA-synthesizing activity. *New Phytol.* 137: 509-517.

pecific labeled 16S rRNA gene oligonucleotide probes for genetic profiling of cyanobacterial abundance and diversity by array **22-28 bp** oligod -vastavate PCR praimerite kc

on stable isotope fractionation and trophic transfer of fatty acids in fungal based soil food chains. *Soil Biol. Biochem.* 37: 945–953.

aiknemist sam **137Cs/134Cs** erinevus mullas näitab seente mütseli paiknemist samas mullas VK sisalduse baasil; saprotroofid, *Hydnum*, *Xerocomus*, *Lactarius F* ja *O hori*

gr. 32: 921–927. Guajaana mägismaa on biodiv hotspot, kuna on võimaldanud jääaegadel taimedel pidevalt üles-alla liikud:

t, *Cenococcum*, *Xerocomus badius*, *Wilcoxina*; pöök eripaigus -Russ ochroleuca, *Xerocomus chrysenteron*, *Genea*, *Cenococcum*, *Lact subdulcis*

ve basidiomycete teleomorphs and phylogenetic placement of the coelomycete genera: *Chaetospermum*, *Giulia* and *Mycotribus* based c *Chaetospermum camelliae* ja C

**DS ja AM** arktika rohttaimedel sessoonselt

ke kui teistel, ent peremehe spetsiifikaat ei esine. Alade kaupa m **eri männiliikidel** *Rhizopogon*: mõnel idaneb rohkem liike kui teistel, ent peremehe spetsiifikaat ei esine. Ala

generation by **taimed ja seemikud on mittejehuslikult jaotunud heterogeenselt** maastikul, samblad ja samblikud soodustavad seemikute idanemist, ent kuld kannil mitte

aceae harbour arbuscular mycorrhizal fungi. *New Phytol.* 156: 283–295. **AM seente spets praimerid** uued: *Glomus cf intraradices* ja *Archaeospora sp* kolonisatsioon

In: Werner D, Newton WE (eds.). *Nitrogen Fixation in Forestry, Agriculture, Ecology, and the Environment*, Springer, Amsterdam, 143-171.

: PC, Stebner F, Thomas JC, Solorzano Kraemer M, Williams C **India Kesk-Lääne** osas olid 50 MAT suured Dipterokarbimetsad

& Sons Inc.

izal communities associated with *Salix herbacea* and *Salix polaris* in alpine tundra. *Mycorrhiza* 21: 289-296.

1, Russ-Lact, Cort, Suill-Rhizop. *Piloderma*, *Sebacina*; kõik ITS kokku: Cort, Russ-Lact, Tuber, **seente ITS** kasvab eksponentsiaalselt, eriti mittetäi

gical and ecological characters in the mushroom family *Inocybaceae*. *Mol. Phyl. Evol.* 55: 431-442. **Inocybe**: kiudloor tekki hiljem

u); *Inoc*

ication of a large clade of mushroom-forming fungi. *Evolution* 65: 1862-1878. **Hebelomatae**: EcM rühm 60+-1

Agaricales. *Proc. R. Soc. B* doi:10.1098/rspb.2011.2428 **EcM** harud *Agaricales* tek eri a

Agaricales. *Proc. R. Soc. B.* 279: 2003-2011.

ining metadata from unidentified ITS sequences in GenBank: A case study in *Inocybe* (Basidiomycota). *BMC Evol. Biol.* 8: 50. **Inocybe g** **Inocybe geenipanga**

hedra: Creataceous fossils and extant molecules. *Proc. Natl. Acad. Sci.* 101: 165 **taimede ITS praimerid** ITS18-SF, ITS26S-R

temporal occurrence of ectomycorrhizae on ponderosa pine (*Pinus ponderosa* Laws.) seedlings grown under varied atmospheric CO<sub>2</sub> and nitrogen levels. *Plant Soil* 189: 2

stone grassland **gap-dünaamika ja seemikute elumus rohumaadel: gappidel erilist** efekti pole, pigem karm kk jm faktorid

**Coltriciella -enamasti seotud lagupuiduga või põlenud puiduga** **Coltricia-Coltriciella -enamasti seot**

n. Muuhulgas männijuured lähevad väh 18m puust eemale

rk persistence **network-anal: organismid, mis oluliselt panustavad** networki, on suurimas väljasuremisohus; sama ka firmade kohta

*oma radicosum* (*Agaricales*): shrew, *Sorex sp.* (*Mammalia*, *Insectivora*). *Mycoscience* 49: 207-210.

**a radicans jms korjustel**

ikkad tüübid siledamate tüüpidega, seente biomass ja penjuurte mass vähenes, kolonisatsioon 100%

ymbioses. *Trends Pl. Sci.* 9: 275-280.

teria from phylogenetic lineages previously only detected in cultivation-independent surveys. *Environ. Microbiol.* 4: 654–666.

ud *Rhizopogone* **vs morfotüüpiseerimine**: kattusid enamasti kergelt tuntavate liikide puhul, ent ei eristanud R

**oslustes 2 aastal + biomass, vs sadem**

root hemiparas **Melampyrum oli palju parema kasvuga ja reprod** mykoriisetsel mandidel kui mitte-MR. EcM seened ei takist parasiidiga nakatumist; ilma taimeta *Melamp s*

on host plant-parasitic interactions. *Mycorrhiza* 11: 95-100.

t DNA in the grasses. *Mol. Ecol. Notes* 1: 76-78. **praimerid taime kloroplastile: trnL jt**

inus uuritud faktor) määrab seenekooslused

132-141. **Uapaca** paikneb suguk *Phyllanthaceae*.

evolution of *Eriogonoideae*. *Syst. Bot.* 33: 87-96. **Coccoloba** sõsarühmaks *Eriog*

on in vitro cultures of ectomycorrhizal fungi from Mediterranean forests. *Cryptog. Mycol.* 22: 243-258.

phytic mycobiota of leaves and roots of the grass *Holcus lanatus*. *Fung. Div.* 41: 115-123.

genetics of the fungal partner. *Annu. Rev. Genet.* 44: 271-292.

ste morf jr metoodika, sest sporulatsioon esineb vähestel ja morf on konservatiivne. Kas eelistada liigisisest BD rühmasisesele Bdlle? AM liigikontseptsioon; erinevate v eri

ing the age of angiosperms from rbcL and 18S rDNA data. *Am. J. Bot.* 88: 1499–1516. **õistaimede** ; **õistaimede radiatsioonij**;

trees. *Trends Pl. Sci.* 8: 374-379. **superpuud: meetodid, vead; bootstra**

*Annu. Rev. Ecol. Syst.* 2002. 33: 49–72. **metoodika probleemid: outgroup, ge**

ce times: a penalized likelihood approach. *Mol. Biol. Evol.* 19: 101-109. **ultrameetriiliste puude konstr: n**

osis of fungal infections. *J. Clin. Microbiol.* 33: 2913–2919. **14 nu radioa 14 nu radioakt** märgistatud oligod; iga seene 2

olution and biogeography of *Paeonia* (*Paeoniaceae*). *Am. J. Bot.* 84: 1120–1136. **psbH praimer**



gen sources using a new floating culture technique. Mycol. Res. 106: 74-85. **ECM seer**

nd diversification in the Holarctic. Biol. J. Linn. Soc. 73: 345-359. **Põhjapoolkeral** loomade biogeoge: tektoonika ülevaade. Enim vikariantsusi Eur --> Aasia vahel ning NW-An

phylogeny-based island biogeography, with special reference to **Kanaari saarte** kesksaared on liigirikkaimad suure kõrgus-ja kliimavööndite rohkuse tõttu. Bayesi meetodid

it-based models: plant versus animal patterns. Syst. Biol. 53: 216-230. **Lõuna-poolkeral** taimed vs loomad. Mustrid väga erinevad. Loomade rühmad tihti märksa vanemad kui taim

molecular analyses in *Scleroderma* species associated with some Caesalpinioid legumes, Dipteroocarpaceae and Phyllanthaceae trees **Scleroderma** Burkina Fasos - p

**Burkina Faso**: Afzelia, Isoberlinia, Brachystegia, Uapaca, Monotes: viljakahadena Boletaceae, Russulaceae, Sclerodermataceae, Amanita; paljudel peremehe-spets. Stünt. I

046-1056. **sümbioos vs mutualism: terminoloogia, teaduse areng, ajaloolised ja kaasaegsed käsitlused**

17: 155-198.

TOL plasmid containing mycorrhizosphere bacterium on development of Scots pine seedlings, their mycorrhizosphere and the microbial flora in m-toluat-amended soil. FE

M, Sen R. 1998. Microbial biofilms and catabolic plasmid harbouring degradative fluorescent pseudomonads in Scots pine mycorrhizospheres developed on petroleum con

allel temporal responses in a host tree and its fungal symbionts. Oecologia 156: 117-123.

ts. Mycologia 97: 45-49.

idel ja EcM seentel eri aegadel JPN. EcMF sültub fotosünt aktiivsusest, saproobidel kliimast.

omycorrhizal genus *Strobilomyces*: Population-level CAPS marker-based genetic analysis. Mol. Phyl. Evol. 48: 326-334.

tribution of fungal species: new insights into microbial cosmopolite seentel: EcM kitsam liikide areaal kui saproobidel. EcM sõltub rohkem sama peremeestaim

tomycorrhizal genus strobilomyces (Strobilomycetaceae). Am. J. Bot. 94: 1630-1641. **Strobilomyces**: JPN palju krüpt

r in the genus Salix. PhD Thesis. University of Minnesota, USA.

i in development of a mycosilviculture. Appl. Microbiol. Biotechnol. 89: 971-979.

ysis of plastid atpB and rbcL gene sequences. Syst. Biol. 49: 306-362. **rbcL vs atpB vs rDNA: väikesed erinevused** **paljas-ja katteseemmetaimede pohiri**

ysis based on rbcL sequences. Kew Bull. 55: 257-309. **rbcL** **eu-kaheidulehelised**

1995. The use of herbarium specimens in DNA phylogenetics: evaluation and improvement. Plant Syst. Evol. 197: 87 - 98.

milies related to Celastrales based on rbcL 5' flanking sequences. Mol. Phyl. Evo atpF ja rbcL introni praimerid

us sp. Liigisisene **3 RE, mikroliigid**

ria liigisisene: **Amanita introduktioon** **RAPD: mikrosatelliit**

of the desert truffles *Picoa juniperi* and *Picoa lefebvrei*. Antonie van Leeuwenhoek 98: 429-436. **Picoa: P. Lefebvrei ja P juniper**

sinteesitud: palju lima, mantil tüüpiline limane saagias str, juurekarvad alusel olemas; kuusel õhuke mantel 1 või enam kihiga, HN norm, rakusis kolonis pole; kasele ka 1. j

keskus inimese soolestikus pasa põhjal: kultiv-ja mittekultiv annavad v erin tulemusi: Candida vs Blastocystis spp. Ka Psathyrella candolleana ja C

l korrel chIA sisaldusega lehtedes, mis mõl korrel seente koosluse struktuuriga

rinevad

koosluse struktuuri

nanita muscaria; OH: Cenoc, Elaphom, Russ acrif; A: Russ acrif, Cenoc, Elaphom; B: Russ acrif, Cort obtusus, Cenoc

orway spruce stands and correlations with the main pedoclimatic factors. PhD Thesis. Universita Degli Studi di Padova, Italy.

les, Verticillium, Dothideaals **18S + DGGE; sekv 18S: eri praimerid -kottseened aknaakasi värvilt**

used talve-kevade ning suve vahel. Molekulaarne diversiteet. Ka ACE ja Chao **ITS9 -LSU1221 (uus)**: uued kottseente harud tundramullas. Märgatavad erinevused talve

n of a dark-septate fungus associated with the alpine plant Ranunculus adoneus. New Phytol. 150: 747-755.

: least one widespread group. Science, in press.

linking molecules and fossils in oribatid mites (Acari, Oribatida). Mol. Phyl. Evol. 57: 113-121. **Oribatida: evol 570 MAT, radi**

i. A novel test **kõrreliste ja lehe-endofüütide koevoluts on** küllalt jäik, ent esinevad mõned peremehe-vahetused. Arv **koevolutsi koevolutsiooni test**

and oomycetes: a review. Mol. Ecol. 12: 2861-2873.

y common descent of fungal symbionts (Epichloë spp.) and grass hosts. Mol. Biol. Evol. 14: 133-143.

asse M-A. 2010. A case study of modified interactions with symbionts in a hybrid Mediterranean orchid. Am. J. Bot. 97: 1278-1288.

acteria and ectomycorrhizal fungi in vitro. Mycorrhiza 6: 481-485.

itudinal gradient in the importance of biotic interactions? Annu. Rev. Ecol. Evol. Syst. 40: 245-269.

ers. 2010. **taimede BS mõj muude maismaaorg indiviidide arvu ja BDD. Mõju tugevaim herbivooridel , vähim omnivooridel; Maa peal on peam**

lds G, Schulze E-D. 2006. The design of experimental tree plantations for functional biodiversity research. Ecol. Stud. 176: 348-375.

**15N sisaldus kasvab mulla toiduahelas ylespoole (3-5 lyli). Sama liigi d15N muster oli sama eri mullahoris -arv et liiguvad eluea jooksul ringi. Vihmaussid e**

nne and comm **vihmaussid: 3 erifunktsionaalset tüüpi, tüübisiseselt enam-vähem** redundantsed; suurem funktsionaalne ja ka liigiline mitmekesisus suurendavad potentsiaals

la as affected **hooghännalised toituvad eri saproobide peal eri eelistusega. Melaniin ei mõjuta. Kahel hooghännalise liigil sarnased eelistused. Paljunemise edukus üldiselt e**

s, legumes, and root nodules herbor different arbuscular mycorrhizal fungal communities. Appl. Environ. Microbiol. 70: 6240-6246.

ifferent tree species in forests of the Taunus Mountains in Central Germany. Open J. Ecol. 3: 66-81.

Trends Ecol. **evolutsioonilised ja ökoloogilised loksud, mis on põhjustatud inimtegevuse poolt. Loomaökoloogia näited**

Saavedra F, S **networks: Seemnelevitajate ja taimede vü Seemnelevitajate ja taimede võrgustike modulaarsuskasvab pooluste suunas. Parimates muc**

ining operational taxonomic units and estimating species richness. Appl. Environ. Microbiol. 71: 1501-1506. **DOTUR: genereerib OT**

statistics: a test to compare gene libraries. Appl. Environ. Microbiol. 70: 5485-5492. **S-Libshuff -võrdleb erin**

nunities have the same structure. ISME J. 2: 265-275. **fülostatistika paketti**

diversity. In: **sarnased kooslused isol arenevad samades suundades, samad evol-harud on sarn s** **koosluste konvergentsiu**

). **liigitekke mehansmid: ülevaade**

diazotrophic alpha-and beta-proteobacteria. In: Elmerich C, Newton WE (eds.). Associative nad Endophytic Nitrogen-Fixing Bacteria and Cyanobacterial Associations. Sj

. Holzforschung 52: 229-233. **RAPD majaseentele: Serpula lacrymans-väike gen.var.; S. himanthoides & C.puteana -su**

eron Island, a **guaanosaaarel taimed omast efektiivselt kusihipet ja ammoniumi. Taimedel üsna erinev 15N ülevõtt, Pisonial sh suht madal -arv. To**

rrhizal association on growth and δ15N of two subtropical Eucalyptus species from contrasting ecosystems. Funct. Plant Biol. 33: 367-379.

y abd utilization in a subtropical wet heathland. Plant, Cell Environ. 20: 1231-1241.

y and utilizatio **AUS niiskes põõsastikus (wallum) mükori**isset taimedel ja NM-taimedel erinev 15N signatuur, mis tuleneb arvatavasti N transpordis

species reflect root specialisations and soil nitrogen status. Oecologia 134: 569-577.

Heron Island, a subtropical coral cay of the Great Barrier Reef, Australia. Functionnal Blant Biology 31: 517-528.

rRNA-Based Operational Taxonomic Units at a Global Scale. PLoS Comput. Bi **klasterdamine algoritmid single, average, complete linkage, UCLUST, CD-H**

**hinnang: proovipõhine hinnang alahindab alati, v.a. Chao3. See jällegi erinevalt teistest ei anna komponentide hinnangu summat sama mis komponentide summa hinnang**

pinna- vs puudusaprotroofid 2 alal 2 aastal koguliigirikust ennusta  
n ectomycorrhizal fungi. Mycorrhiza 16: 67–72.

148 others. 2009. A class-wide phylogenetic assessment of Dothideomycetes. Stud. Mycol. 64: 1-15. Dothideomycetes: Dothideomy  
o L., Federnse S. 2014. Finding needles in haystacks: linking scientific names, reference specimens and molecular data for Fungi. Data tüüpeksemplaride ja liiginimed  
Fungal Barcoding Consortium. 2012. Nuclear ribosomal internal transcribed spacer (ITS) region as a universal DNA barcode marker for Fungi. Proc. Natl. Acad. Sci. USA  
106. A multigene phylogeny of the Dothideomycetes using four nuclear loci. Mycologia 98: 1043-1054. Dothideomycetes:  
e: a phylum-wide phylogeny clarifies the origin and evolution of fundamental reproductive and ecological traits. Syst. Biol. 58: 224-237. Ascomycota 6 geeni baasil: par  
t., Geoglossales ord. Nov. And taxa above class rank in the Ascomycota Tree of Life. Persoonia 22: 129-138. Geoglossomycetes, kottseente l  
nds in savanna structure and composition along aridity gradient Edela-Zambiast LAVni: Brachystegia savann kui sademeid üle 700 mm  
ig in Pennsylvania. Trans. Am. Phil. Soc. 56: 1-194.

tae: insights from recent phylogenies. Biologiske Skrifter 55: 37 Caesalpinioidae: mõned EcM perek-grupid levinud nii Aafrikas kui S-Ameerikas (nt Intsia -Afzelia-Brodr  
itative detection of agar-cultivated and rhizotron-grown Piloderma croceum Eriks quantPCR Piloderma fallax vs hüüfide otsene loendamine. Väga tähtis on inhibitoritevab  
source of novel biologically active secondary metabolites. Mycol. Res. 106: 996-1004. lehe-end

ogically active secondary metabolites of endophytic *Pezicula* species. Mycol. Res. 8: 1007-1015. endofüüt  
lin.

ratios of mistle puuvoorikutes 47-67 protsenti Cst tuleb peremeestaimest; v tugev korrel puuvooriku ja peremehe 15N vaartustel. Puuvooriku 13C 2 promilli vaiksem kui C2  
mis and arbuscular mycorrhizal fungi. Plant Soil 244: 75-83. Geosiphon ja AM-seened

nd genera. Schüßler A, Walker C, Gloucester, Published in libraries at Royal Botanic Garden Edinburgh, Kew, Botanische Staatssammlung Munich, and Oregon State Un  
Oregon: *Colrylus avellana* on EcM, *Juglans regia* AM  
K, Pringle A. EcM ja AM seente introduts: ülevaade ja ohud: seend ei pruugi soodust peremehe kasvu, võivad stimul invas taimede invasiivsust, er männid a eukal. Sama  
arkets as a mess jagamisele põhinev mutualismi-protokooperatsiooni mudel kus on vaja, et organismid spetsialiseerusid mingi konkreetse ressursi kättesaamisele. Hiljert  
a Trees. 185 pp. Springer-Verlag, Berlin Heidelberg.

t SC. 2008. Plant-soil-microorganism interactions: heritable relationship between plant genotype and associated soil microorganisms.  
ing cottonwood kōdulagunemine: kloonidevah erinevused sama suured kui liikidevah (Populus). Kōdusegul pole aditiivset efekti  
). in human fecal samples with species-specific 16S rRNA-targeted oligonucleotide probes. Appl. Environ. Microbiol. 66: 37 18-20 nu oligonu probed eraldi; nii PCR-ampl  
fferent evolutionarily conserved regions of the small-subunit rRNA gene in PCR- 16S: eri praimerid + SSCP 18S: eri praimerid + SSCP: kultuurist samal bakteril kuni 4  
usions on the use of genetic profiles based on PCR-amplified partial small subuni 16S: + SSCP bakterite BD ma SSCP ühes bāndis sisaldub mitukümmend liiki, arv suurem  
n 52: 101-104 taimede liigirikuse globaalne hinnang 223300. Arv sõltub enim sünonüümide% hinnangutest. Muud estimateid 260000-422000  
as revealed by mapped PCR-based markers. Acta Hort. 457: 363-369. RAPD, SCAR  
-281. Aleuria, Aleurina, Sowerbyella

127-136. Nothofagus ja tema parasiidid on kongruentselt levinud austaalises; siiski siin-seal seletama  
nutrient additions and ectomycorrhizal infection. Plant Soil 163: 299-306.

e exclusion, b liikidevaheline konkurents mõjutab taimede liigirikust ja beta-div positiivselt v negatiivselt  
rDNA sequences. BMC Bioinformatics 2: 9. FastGroup: sekvenside  
nizal dependen invasiivsel *Hypericum* P-Ams sissetoodud populatsioonidel väiksem sõltuvus sümbiontidest kui euroopa populatsioonidel. Katse vai  
, McLaughlin ???, Lemke ??? (eds.). The Mycota VIIA. Systematics and Evolution. Pp. 307-347. anamorfseid seened -pms kottseened.

f biotrophy in Hygrophoraceae inferred from combined stable isotope and phylogenetic analyses. Mycologia 103: 280-290.  
l cuttings of *Picea sitchensis* -the influence of plant growth regulators. New Phytol. 120: 453-457. kuuse mik  
nmunity-level soil microbial function in conifer forests of the Pacific Northwest, USA. Soil Biol. Biochem. 37: 1860–1868. lepa lisand

ion and recombination of the intergenic spacer of the ribosomal DNA in the ecto IGS1 IGS1 heteroduplekside moodustumine tandemjärjestuste tc  
with plant roots as endophytes? Mycol. Res. 113: 1062-1069.

ila sp, *Hysterangium* spp, *Sebacina* sp, *Tomentella* spp, *Elaphomyces* spp (?) Epipactis ITS1F-ITS4, TW13; ITS1-ITS4Tul  
bicolor: introdutseeritud vs kohalikud tüved  
rends Ecol. Evol. 13: 15 – 20. taime ja seene vaheline sümbioos, se

S *Laccaria* intraspec. sekv LSU M3/M6  
sp perek-sisene, geneti RAPD

dangereuses? Trends Ecol. Evol. 11: 621-628.  
ut mixotrophy miksotroofsed taimed: arv. C-toitumine on tek N ja P toitumise käigus pooljuhuslikult  
vertical transmission? An evolutionary perspective. New Phytol. 173: 452-458.  
es are common mycorrhizal associates of Ericaceae. New Phytol. 174: 864-878.

omycetes plant endophytes? New Phytol. 178: 3-7.  
sebacinoid basidiomycetes associated with the achlorophyllous orchid *Neottia* nic ITS1F-4: *Sebacinaceae*  
i *duriusculum*: noores metsas suur genet, vanemates palju väiksemaid: rajaja efekt -1m kasvukiirus a-1  
19. maksasammaldes endofüütised seened mood palju erinevaid struktuure. Tõenäoliselt pole need igivanad, vaid suht uued. Ka paljud seenerühmad on noorema  
g-term experimental warming alters community composition of ascomyc tundras saprotroofsed kottseened: BD ei muutu, ent soojenemise mõju on kooslustel  
izal roots. Presilia 33: 341-350.

d spacer RFLP groupings in binucleate *Rhizoctonia* isolates representing root end 3 RE: *Rhizoctonia*  
sylvestris L.) forests based on somatic incompatibility and isozyme analyses. New Phytol. 114: 607 – 616. esteraas, l

angi affect Scots pine seedling performance in nursery soil. New Phytol. 152: 543-553. ANOVA jt oxalaat  
site reclamations: fungal selection criteria. Lett. Appl. Microbiol. 16: 142-146.

nass suurem) vs vanas (BD suurem) alpikuusikus  
e forming *Penicillium nodositatum* inferred from RFLP analysis of the ribosomal *Penicillium nodositatum*: ITS-RFLP 2234T (ITS1) ja 3126T (ITS4 analoog); RAPD 10me  
microbial abun mullamikroobide biomassi glob skaalas sc mullamikroobide biomassi glob skaalas seletavad paremini MAP, evapotransp, MAP/Eto x  
ljong B, Bodrossy L. 2006. Diagnostic microbial microarrays in soil ecology. New Phytol. 171: 719-736. mikroarray tüüpide ülevaade. Seente ja bakter  
soil communi mulla mikroja mesofauna redundantsus: funktsionaalne redundantsus olemas, ent liikidel ilmselt erinevad ökol tolerantsid, mistõttu t

ure in the presence and absence of ectomycorrhiza. *Oecologia* 125: 109-118.

a strategy to estimate species richness in Sebaciniales in the tropical Andes based Sebaciniales DNA barcoding: ITS 3% vastab LSU 1% (20% vähem liike!) mõlemad rühmad assots nii kottseentega kui Sebacinialestega, ent vaid Cavendishioiidid mood rakkudevahelisi hüüfe ja õhkuse seenmantli

ycorrhizas. *New Phytol.* 72: 381-385.

fungal diversity in *Quercus ilex* Mediterranean woodlands: variation among sites and over soil depth profiles in hyphal exploration types, species richness and community gs inoculated with *Tuber aestivum* in the boreal region of Finland. *Mycol. Progr.* 13: 373-380.

onomic replacement of *Rhizoctonia*-like endophytes from orchid roots. *Mycologia* 94: 230-239.

owski B, Ideker T. 2003. Cytoscape: a software environment for integrated models of biomolecular interaction networks. *Genome Res.* 13: 2498-2 Cytoscape, enestik, originaalandmed Madhya Pradesh )Kesk-IND): W Ghat-Dipteroc, W-Himal-Pinaceae,Fagaceae, MP-Shorea domin russ-lact, amanita, bole rhizoctonia spp. using rDNA-ITS sequence analysis supports the genetic basis of the classical anastomosis grouping. *Mycoscience* 49: 93- Ceratobasidiaceae, Tulasnellaceae and classification of *Rhizoctonia* spp. using molecular and biotechnological methods compared with the classic multi-tuumset Rhizoc multi-tuumset Rhizoctoniad (Thanat ull. 54: 739-746.

it isolated from *Pisonia grandis* (Nyctaginaceae) mycorrhiza. *Mycorrhiza* 7: 255-260. Tomentel

ycobiont isolated from mycorrhizas of *Pisonia grandis*. *Mycol. Res.* 101: 315-318.

root-associated fungal endophytes from *Calluna vulgaris* at contrasting field sites. *New Phytol.* 148: 153-162.

rum in a *Quercus ilex* plantation in southern France. *Mycol. Res* 100: 1176 -1178.

saprotrophic fungi on agar and in association with seedlings of lodgepole pine (*Pinus contorta*). *Mycol. Res.* 99: 159-165

oto T. 2010. Evolution of host breadth in broad interactions: mycorrhizal specificity in East Asian and North American rattlesnake plantains (*Goodyera* spp.) and their fungi Estonian mine site tailings hills. *Am. J. Bot.* 95: 156-164.

l vaid 2 klaadi Tulasnellaga ilma geogr mustrita; palju Phialophora-endofüüte, mi ITS, LSU, mtLSU Mikrobioloogia 25: 57-60.

osa praimerid sekv taime, teised ei amplif üldse

l to atmospheric convective mixing. *Nature* 505: 37-42.

globaalse soojenemisega toimub maismaapinna ja ookeanipinna kuivenemine, kuna 22. sajandiks on kõik kooslused maismaal muutunud kuivemaks peale alade Indias j

cis, *Xerocomus chrysenteron*, *Byssocorticium atrovirens*

xxx ITS praimerid ???

fricanum Welw., a leafy vegetable from West Africa. *J. Hort. Sci.* 71: 149-155. Gnetum: v

al roles of oxalic acid as low molecular weight compound involved in brown-rot and white-rot wood decays. *J. Biotechnol.* 53: 103-113. oksalaat: v

cterization of mycorrhizal fungi isolated from the threatened *Cypripedium macranthos* in a northern island of Japan: two phylogenetically distinct fungi associated with the Cenococcum sp rDNA intron ja ITSd

struktuur

ITS: 13 RE; Cenococcum sp ü

Cenococcum ITS kor Cenococcum sp

d populations, in particular of the dark septate endophyte *Phialocephala fortinii* s.l. In: Schulz BJE, Boyle CJC, Sieber TN (eds.). *Microbial root endophytes*. Springer, Bte v. 21: 75-89.

. *Nucl. Ac. Res.* 23: 1087-1088.

DNA walking meetodi parandus, arusaamatu

ecies from roots of ericaceous hosts in western North America. *Stud. Mycol.* 53: 53-62. Cryptosporiopsis brunnea ja C.

unes of Baja California. *Mycorrhiza* 6: 151-157.

l to obtain endophytic microorganisms from field-collected roots. *Soil Biol. Biochem.* 40: 1259-1263.

the hierarchical organization of plant diversity. *Ecology* 87: S39-S49.

int communitie vastuargument evolutsioonilisele ökoloogiale hemiboreaalsel rohumaal

ies-rich grassl: Reseda ja Anthyllis idanesid horeda taimkattega mikropaikades alvaril

rrhizal network EcM võrgustikud: C transport: ülevaade; sesoonselt võib suund olla erinev; kevadel PsTsuga -> Betula, suvel vastupidi ja sügisel PsTs

tween Betula papyrifera nad Pseudotsuga menziesii seedlings using 13C pulse labeling method. *Plant Soil* 191: 41-55.

rocal transfer of carbon isotopes between ectomycorrhizal Betula papyrifera and Pseudotsuga menziesii. *New Phytol.* 137: 529 – 542.

etween Myco ülevaade ECM seente mineraal-ja C-toitumisest, WWW, C, N, P ülekanne taimest taime

l flora as agents of complex adaptive systems. In: Messier C, Puetman KJ, Coates KD (eds.) *Managing Forests as Complex Adaptive Systems*. Oxon, UK: Routledge. Pp.

transfer of carbon between ectomycorrhizal tree species in the field. *Nature* 388: 579-582.

enched): MRA (Phialocephala), Rhizopogon, E-strain (Wilcoxina), Amphinema -mitmed RM tüübid; kontroll: MRA, E-strain jt siledad tüübid. Oluline erinevus vaid Rhizo

tion and facilit Lepp facilitateerib noorte mändide kasvu läbi mõõduka varjutuse ja N produtseerimise

iron. *Microbiol.* 77: 1153-1161.

lence with vascular land plants. *Nature* 363: 67-69.

al genes from vesicular–arbuscular endomycorrhizal fungi colonising roots. *Appl NS31 primer*

Recent assembly of the Cerrado, a neotropical plant diversity h Cerrado taimestik on evolutsioneerunud iseseisvalt 10 MAT v vähem

ner than previously thought. *Mol. Biol. Evol.* 25: 2251-2254.

ühel haploidsel seeneindiviidil mitukümmend SSU

idel: domin Boletus; Suillus koos sissetoodud ja origin-mändidega; Paxillus rubicundulus lepal; Scleroderma, Ramaria (Dipteroc); Thelephora (1);

isolithus and Scleroderma identified by combined phenotypic and genomic mark 3RE, Pisolithus, Scleroderma isosüümid

Manause läh üleujutatud aladel (tumed, toitainevaese settega, happeline pind) EcM taimed domin: Aldina ja Swartzia (, Macrolobium?). Seened üleujutuste vahepeal vihn

Lõuna-Ameerika põhjaosas: Aldina, Glycoxyton (Pradosia), Allophylus edulis (Gyrodon rompelii, mille lähedased Lõuna-Ameerika põhjaosas: C

Ameerika lõunaosas: Tucuman + Tierra del Fuego: Nothofagus, Alnus, Salix, sissetoodud lehtpuud Populus, Tilia. Lõuna-Ameerika lõunaosas: Tu

ties. *Ecology* 41: 549-551.

CHL: EcM seente viljakehi väljaspool Nothofaguse metsi pole; domin Cortinarius ja Inocybe

Boletochaete, Xanthoconium (s

Neopaxillus gen nov Brasiilia l

Lõuna-Ameerikas Eur EcM puude all Amanita muscaria, Am pl Lõuna-Ameerikas Eur EcM puude all Amanita muscaria, Am phalloides, Leccinum nigrescens, Trich flavo f the east slope of the Andes and Brazil. V. Gasteromycetes with agaricoid affinities (secotiaceous Hymenogastreae and related forms). *Bol. Soc. Arg. Bot.* 10: 52-67.

meerikas Boletaceae: v mitmekesine Paxillaceae: nii EcM kui sapro vormid kogu kontinendil. Linderomyces, Gyrodon, Gyrodon romp Lõuna-Ameerikas Boletaceae: v mit tel Uruguai Atlandi rannikul: sagedasemad Peziza ammophila ja Peziza ammophila, ka Hygrocybe, Leucoagaricus, Coprinus, Conocybe, Agrocybe, Psilocybe. EcM liike p

Tsiilist uute saproobsete lehkseente

mycorrhizal Symbiosis and Fungus Succession in the Nothofagus dombeyi-Austrocedrus chilensis Woods of Patagonia. In: Hacsakaylo E (ed. ). Mycorrhizae. USDA Forest Service dombeyi -Austrocedrus segamets: põlismetsas domin Cortinariusi, Inocybe, muid palju vähem liike; põlendikel Peziza echinospora, Pez. nothofagei, P. Petersii, Sowerbyi, **Phyllobolites** gen nov (Paxillaceae).

**Manause lähi ülejutatud adadel (valge liivaga, toitaineterikka settega) puuduvad EcM taimekooslused, kuigi v üksikud Amanita nauseosa, Gyrodon ja Pulveroboletuse viljad. Manause juures Campinaranas (valgel liival) esineb palju EcM puid -Aldina, Pradosia schomburgkiana (syn Glycoxyllon inophyllum), Swartzia, G** 40: 435-447. **Lactarius** sect panuoidei: kasvavad c

c Books, Germany.

fillard P. 2008. Relationship between assemblages of mycorrhizal fungi and bacteria on grass roots. Environ. Microbiol. 10: 534-541. **koosluste korrelatsioonid**

nd seed yield, and seed quality. Eur. J. For. Path. 20: 397-404.

ri praimerid annavad v erineva pildi; domin Wallemiomycetes ja Malassezia.

ions of 16S rRNA gene sequence libraries from environmental samples. Appl. Environ. Microbiol. 67: 4374-4376. **evolutsioon evolutsiooniline distant**

d 15 others. 2008. Stoichiometry of soil enzyme activity at global scale. Ecol. Lett. 11: 1252-1264 **mullaens**

river and its ba **Amasonia igapo vs varzea. Sademete jaotus. Salix humboldtiana varzea alumise piiri puu**

cleroderma) ja Russuloid klaidid **Peremeestaime identif trnL-trnF järgi**

ete rakkude läbimõõdu ja mantli paksusega

998. In vitro mycorrhizal synthesis of micropropagated Tilia platyphyllos plantlets with Tuber borchii mycelium in pure culture. Acta Hortic 457: 379-387.

ic matter, biota and aggregation in temperate and tropical soils - effects of no-tillage. Agronomie 22: 755-775.

nary history of Serpulaceae: molecular phylogeny, historical biogeography and evidence for a single transition of nutritional mode. BMC Evol. Biol. 11: 230.

, Carbohydrates, and Auxines. In: Hacsakaylo E (ed. ). Mycorrhizae. USDA Forest Service: Washington USA. pp. 151-182.

f 16S rRNA in soil. Appl. Environ. Microbiol. 67: 4708-4716. **vt<; detektsi 15-20 nu** detektor-chaperon probed, eraldi pü

titution rates through time in Bayesian phylogeny reconstruction of Sapotoideae (Sapotaceae). Mol. Phyl. Evol. 39: 706-721. **Sapotaceae:** Sapotoideae -

diversity in the wheat rhizosphere by sequencing of cloned PCR-amplified genes encoding 18S rRNA and temperature gradient gel electrophoresis. Appl. Environ. Microbi

**ECM: väga erinev** **DGGE; ITS1, ITS4B; DGGE; anniing 48°C**

times. J. Afr. Earth Sci. 28: 71-97. **Gondwana kambriumist triiaseni: peri-Gondwana tükid, lagunemine tõenäoliselt pluumide toimetel; pooluste**

al forest and vicinity -I. The genus Phaeocollybia (Agaricales) and notes and descriptions of other species in the Agaricales. Mycologia 64:1138-1153. **Cribbea** gen nov. Maapealsete :

tal forest and vicinity I. The genus *Phaeocollybia* (Agaricales) and notes and descriptions of other species in the Agaricales. Mycologia 64: 1138-1153. **Psiloboletinus** on arv Suillus

l. ). Mycorrhizae. USDA Forest Service: Washington USA. pp. 1-8.

llings of Pinaceae and Betulaceae after spore inoculation with *Glomus intraradices*. Mycorrhiza 7: 279-285.

lc sp

Cortinariusi42; sagedus: Tricholoma sp, Rhizopogon sp, Piloderma sp; perekondadest eriti Inocybe, Tomentella ja Cortinariusi; Liigiti aastatevah erinevus palju suurem kui a **regressioon (SAS)**

ushrooms. In: Zambonelli A, Bonito GM (eds). Edible Ectomycorrhizal Mushrooms. Springer: Berlin, Germany. Pp. 17-38.

: exception or the rule? Dominant ectomycorrhizal fungi on *Pinus sabiniana* differ from those on co-occurring *Quercus* species. New Phytol. 182: 295-299.

**lla (16); Russ/Lact (15); Geneoid (8); Inocybe (8) Amanita (5); sh Amanita ja Tricholoma (4) ei leitud EcM-na.** Väidavad, et vilets viljakohade korjamine on tublisti kalluta

riation of ectomycorrhizal fungi as assessed by rDNA sequencing of sporocarps and pooled ectomycorrhizal r **EcM seente** liigisisene varieeruvus väh 40% liikidest lokaa

Phylogenetic analysis of the genus *Modicella* reveals an independent evolutionary origin of sporocarp-forming fungi in the *Mortierella Modicella* on viljakohi produkt

nd. Mycol. Res. 113: 858-866. **Otidea** 2 haru. Mõl mood EcM

fungus diversity and community structure on three co-occurring leguminous canopy tree species in a Neotropical rainforest. New Phytol. 192: 699-712.

he ectomycorrhizal fungal community in a neotropical forest dominated by the endemic dipterocarp *Pakaraimaea dipterocarpacea*. PLoS One 8 (1): e55160.

raction between *Boletus robropunctus* (Boletaceae) and *Quercus* species (Fagaceae) in the United States and Mexico. Am. J. Bot. 96: 1665-1675.

truffle *Fevansia aurantiaca* is an ectomycorrhizal member of the *Albatrellus* lineage. Mycorrhiza 23: 663-668. **Fevansia aurantiaca** kuulub /all

v of F. von Höhnelt's truffles from Java. Mycol Progr. 10: 249-260.

ov. (sequestrate Russulaceae), an ectomycorrhizal associate of *Quercus* in California. Mycol. Res. 110: 575-582.

ascumata and ectomycorrhiza formation in a *Quercus* woodland. Mycologia 98: **Genea, Genabea ja Gilkeya** on sarn perekonnad. Ger **Genea, Genabea ja Gilkeya** on sarn j

rapping fungi (Orbiliaceae). Microb. Ecol. IN PRESS **Orbiliaceae:** LSU fülogenees ja s

ry in flowering plants. Science 322: 86-89. **Puud** evolutsioneeruvad aeglas

s, London.

s, London, UK.

al (AM) symbioses: the contribution of the mycorrhizal P uptake pathway is not correlated with mycorrhizal responses in growth or total P uptake. New Phytol. 162: 511-5

nix experiments result from differences in resource quality between litters? Oikos 102: 235-242.

ssima (Orchidaceae) and persistence in a re-introduced population. Aust. J. Bot. 58: 97-106.

**tor in forest re** **Dipterokarbid: poolvarjus kasvavad seemikud kõige paremini.** Fagaceae ja Pinaceae juurte lisamine ei nakatanud seemikuid EcMga. Arv selektiivraiega aegl

ransformations puulüügid mõjutavad mulda ja mikroobide aktiivsust eriti >40 a metsades

en K, Baldrian P. 2011. Transformation of *Quercus petraea* litter: successive changes in litter chemistry are reflected in differential enzyme activity and changes in the mic

8) Spatial variability of enzyme activities and microbial biomass in the upper layers of *Quercus petraea* forest soil. Soil Biol Biochem 40: 2068-2075.

inktsioonidega: Michealis-Menten-fn parim **liigirikku**se ekstrapoleer

in *Pleurotus sajor-caju*. Microbiol. 147: 1755-1763. **lakaasi geenide rt-PCR** **4 lakaasi i**

a podzolized pine forest soil in Central Sweden. Soil Biol. Biochem. 11: 149-154.

ending disaster. Trends Ecol. Evol. 19: 654-660. **Kagu-Aasia** biodiversiteet eri geoloogilistel mikrokontinentidel, hetkeseis, kaitse ja tume tulevik

by organism size. Ecology 94: 660-670.

ological communities. Ecography 30: 3-12. **ruumilise** autokorrel:

osystems. Ecology, in press.

neity among lineages of tracheophytes: integration of fossil data and evidence for molecular living fossils. Proc. **erinevad soontaimede erinevad soontaimede rühmad** DNA

Limited carbon and nutrient gain from mycorrhizal fungi by adult Australian orchids. Am. J. Bot. 99: 1133-1145.

LD. 1996. Isolation of expressed sequence tags of *Agaricus bisporus* and their assignment to chromosomes. Ap **rDNA** koopiare arv on erinev ja pikkus isolaadisiseselt var

älja istutatud: Pezizales domin

the mounds of **termiidipesades on paiguti v palju ECM seente eoseid**

Lutzoni F, Hofstetter V, Fraker E, Gueidan C, Miadlikowska J, Reeb V, Lumbsch T, Lücking R, Schmitt I, Aptroot A, Roux C, Miller **leukottseened: OrbilioM(Pezizo**  
genetic placement of the ectomycorrhizal Cenococcum in Gloniaceae. Mycologia 104: 758-765. **Cenococcum on suguk Gloniac**

pective on the occurrence of nodulation. New Phytol. 174: 11-2: **Leguminosae** noodulite evol, teke ja kaotamine: arv mitmekordselt. **Leguminosae** noodulite evol, teke ja  
fit in? Plant Physiol. 144: 575-581.

S vs ITS (pole viburseeni) andis v erin tulemused;

ite conditions **erinevate okaspuude seemnete idanemine eri soo mikropaikades:** erisamblad on oluliselt erinevad eriokaspuude idanemiseks ja kasvuks, moni neist sammald  
15-229. **Pisonia grandis** on levinud AUS Jõulusaarest Taivanini ja Pitcairini

o, Venezuela. Acta Cient. Venezolana 34: 233-237.

**Manause ümbruse amasonias mood EcM Gnetum ja Neea 2 spp. EcM ja AM puude juured pms ül 10 cm kihis; NM puude juured (sh Swartzia 2 spp) pms >30 cm kihis;**  
Statistical approaches for estimating actinobacterial diversity in marine sediments. Appl. Environ. Microbiol. 69: 6189-6200. **aktinobakterid** 16S rDN

of hyphae of mycorrhizal fungi determined by AMS microanalysis of 14C. Science 300: 1138-1140.

. Bicolor; kõrvalalal: Cenoc, Mel. Bicolor, Amanita muscaria, Lact decipiens

**Pyrus communis, Malus domestica, Sorbus aucuparia, Crataegus, Prunus mood EcM**

v. 2009. The Fungi. Curr. Biol. 19: R840-R845.

AxML web-servers. Syst. Biol. 75: 758-771.

lyses with thousands of taxa and mixed models. Bioinformatics 22: 2688-2690.

**RaXML uus versioon**

Juglandaceae) based on matK and ITS sequence data. Am. J. B **Juglans levinud** P-Am, Andides Kaukaasias, Ida-Aasias. Arv levinud I **Carya(Platy**carya(Cyclocarya(Juglar  
89. **taimed toodavad niitudel juuri eri aegadel, nematoodide, termiidite tähtsus**

onization of half-high blueberry cultivars influenced by cultural practices. Acta Hortic. 715: 449-454.

rchid *Gymnadenia conopsea*. Mycol. Res. 113: 952-959

l.) Mycorrhizae. USDA Forest Service: Washington, USA.228-229.

ceae tribe **Cari**ceae I: generic relationships and evolutionary scenarios. Syst. Bot. 29: 528-544. **Kobresia on** polüfüleel rühm Carexi

.statsoft.com.

phylogeny of Casuarinaceae. Mol. Phyl. Evol. 28: 47-59.

**Casuarinaceae:** Allocasuarina, Casuarina, Ceuthostoma ja Gymnoston **Casuarinaceae:** Allocasuarina, Casu  
dicine 9: 140-145. **ülevaade, pildid**

deva R, Jones **network-anal:Bakterite ja protistide SSU-põhine kooseksist network meres**

uce (Picea glauca) from southern Quebec. Can. J. Bot. 84: 777-790.

on target and non-target fungi. Environ. Res. 18: 441-475.

mpared to phenotypic data reveals multiple cryptic species in Australian dermocyboid Cortinarius (Agaricales). Mol. Phyl. Evol. 71: 2 Cortinarius AUS: parim ITS ba  
1 8-year-old transgenic poplar plantation on the ectomycorrhizal fungal community. Appl. Environ. Microbiol. 75: 7527-7536.

hizal fungi. Can. J. Bot. 68: 468-470.

hypocotyl cuttings of Larix laricina. Can. J. Bot. 68: 492-498.

of radionuclides in forest ecosystems. J. Environ. Radioactivity 58: 217-241.

1, Russ2; poletatud: Martellia, Tom2, Tomentella sublilacina, Hygroph. Liigirikkk 3 RE

spread? Ecol. Bull. 49: 85-91.

ous controls of developmental pathways: variation and its significance in the forest **pathogen, Heterobasidion annosum.** New Phytol. 113: 245 – 258. **lakkasi, P**

airings between sibling homokaryons of Heterobasidion annosum. Mycol. Res. 95: 1275-1283

omatic incompatibility, sexual incompatibility, and isoenzyme patterns. Can. J. Bot. 63: 2268 – 2273. **isotsüüma**

611.

**ei usu et ECM seente dikartiiootsed genetid inkorpor endisse haploideiseid eoseid et säilitada potentsiaali, sest on tugev konkurents, vähe toitaineid ja vähe val**  
inus sylvestris **Hebeloma, Laccaria, Thelephora mood ECM ka vee all olevatel juurtel, Suillus spp mitte. Samas olemasoleva ECM ülejutamine ei tapa mükoriaasid. Suill**  
zieae-Aldininae) from the Venezuelan Guayana highlands. Harv **Aldina levinud** NW-BRA, COL, VEN, GUY

aluating the ribosomal Internal Transcribed Spacer (ITS) as a candidate dinoflage **Barcoding: Dinof**lagellate ITS on parem kui COI, sobiv 98% threshold; vahe:  
odiversity effe **stress: mida suurem stress, seda tugevam negatiivsem mõju on madala BD-ga kooslustele. Vetikate põhjal**

ies coexist in **Raportori seadus** **Raportori seadus**

**NZL Hygrophoraceae** taksonoo

-growth beech (Nothofagus) forests, New Zealand. JJ. Veg. Sci. 2: 679-690.

5: 2001-2009.

**ANOVA, multiple comp**

v. 2010. The neglected hypogeous fungus Hydnotrya bailii Soehner (1959) is a widespread sister taxon of Hydnotrya tulasnei. Mycol. Hydnotrya: ITS põhjal 13 liiki,  
P, Göker M. 2013. *Hoffmannoscypha*, a novel genus of brightly coloured, cupulate Pyronemataceae closely related to *Tricharina* and *Geopora*. Mycol. Progr. 12: 675-68

t SG, Prati D, Klironomos J. 2006. Invasive plant suppresses the growth of native tree seedlings by disrupting belowground mutualisms. PLOS Biol. 4: 727-731.

idence for the symbiosis between Tuber aestivum and Picea abies. Mycorrhiza 23: 669-673.

Y, Bex V, Midgley PM. Climate Change 2013: The Physical Science B: **ülevaade** toimunud ja eeldatavatest kliimamuutustest

izal fungi. New Phytol. 187: 461-474.

largest subunit of RNA polymerase II as a new marker gene to study assemblages of arbuscular mycorrhizal fungi in the field. PLoS ONE 9: e107783.

model fungus in arbuscular mycorrhiza research, is not Glomus intraradices. New Phytol. 183: 1176-1187.

perimental plan **taimed: tihedusest ja agregeeritusest sõltuvad kasvuerinevused: 4** taime väga erineva kasvukiirusega. Vaid koige kiiremini kasvaval taimel oli liigisisene kon  
. 46: 59-102. **metsas puujuurte ulatus reeglina 10-20 m, üksikutel puudel kuni 30m; troopikas kuni 50m; sügavus sõltub pinnaveest; kuni 60m troop**

**xxx, transform**

ycorrhizal mushroom *Cantharellus cibarius* obtained by germination of spores and culture of fruit body tissue. Trans. Br. Mycol. Soc. 85: 689-697.

**proovid soo metanotroofid: ca 18 b probed (soovit teha üh**

otyping *Cryptosporidium parvum* with an hsp70 single-nucleotide polymorphism microarray. Appl. Environ. M **15 nu probe, 15 nu probed SNP** a **ANOVA**

ions and native Australian forests. Aust. Ecol. 26: 447-457.

in the eye of th **metsataime Rhododendroni varis laguneb** kiiremini metsa-aladel; rohu varis laguneb kiiremini rohumaadel

ificance of mic **varis laguneb** kiiremini omaenda kasvukohast korjatud mullainokulumi juures, mis on eriti oluline rasklaguneva varise puhul. Mikrok

it and conditions of mycorrhizal synthesis in vitro. *New Phytol.* 102: 95-101.

on ethylene production by mycorrhizal fungi on pine. *Mycorrhiza* 4: 193-196.

*rdii* species complex (Russulales). *Fung. Biol.* 114: 271-283.

**Lactarius gerardii** koosneb troosioon of two divergent fungal individuals led to the recent emergence of a unique widespread pathogen species. *Proc. Natl. Acad. Sci. USA* 109: 10954-10959.

-dominant genetic markers from single spores of arbuscular mycorrhizal fungi by **AM seente intronite** ja LSUle multiplex PCR. K mitte-degener praimerid, mis arv on p the forest dies: the response of forest soil fungi to a bark beetle-induced tree dieback. *ISME J.* 8: 1920-1931.

oss-taxon koos **koosluste võrdlemisel kasutada sarnasusindeksit**, mis põhineb BD-I mitte vaid liigirikkusel. Bray-Curtise indeks, mantel-test **koosluste võrdlemisel k** es subgroup B from mycorrhizae with epiphytic orchids in a neotropical mountain rain forest. *Mycol. Progr.* 7: 75-85.

rsity: a microc **erinevad mullaloomad armastavad eri-lehekõdu**; BD suurem kui kõdud on laikudena vs segatud; lagunemiskiirus ei muutu; CWDs kõige vähem loomi microfungi on formation of mycorrhiza by *Laccaria bicolor* in vitro. *New Phytol.* 105: 437-448.

black spruce. *Can. j. Bot.* 66: 553-557.

cent microhabitats within the rhizosphere of black spruce. *Can. J. Bot.* 67: 1085-1095.

pathogenic species in the genus *Fusarium*. In: Gillings M, Holmes A (eds.). *Plant Microbiology*. Pp. 207-223.

angiosperm, *Archaeofructus*, from Northeast China. *Science* 282: **Archaeofructus**: ülem-triases Hiinast, iseloomulikud tunnused mycorrhizal and saprotrophic fungi. *Mycorrhiza* 1: 63-69.

n-reabsorption in a mycorrhizal fungus, the dynamic interface for interaction with soil and soil microorganisms. *Mycorrhiza* 9: 137-144.

lysis of a symbiosis-regulated and Ras-interacting vesicular assembly protein gene from the ectomycorrhizal fungus *Laccaria bicolor*. *New Phytol.* 161: 529-538.

the Mbé National Park, Monts de Cristal, Gabon. CARPE report, Libreville, Gabon

*Mycol.* 60: 29-62.

*Mycol.* 60: 29-62. **Xerocomellus, Hemileccinum** g a pirolata, in *Pyrola asarifolia* and cones of *Picea glauca*, and morphology of the spore stages. *Can. J. Bot.* 62: 2441-2447.

zal symbionts of *Pisonia grandis* and *P. sechellarum* in Seychelles: identification of mycorrhizal fungi and description of new *Tomentella* species. *Mycologia* 102: 522-5.

tram N-depos aladel, lkust puudusid *Tricholoma*, *Piloderma*, *Cortinarius*; *Boletus* vähem arvukas; **oil**. *FEMS Microbiol. Lett.* 254: 251-257. **Tuber melanosporum**-spets ITS praimerid, kv *Tuber melanosporum*-spets ITS nsive and non-redundant UniProt reference clusters. *Bioinformatics* 23: 1282-128 Uniref, Uniprot in hierarchical clustering. *Bioinformatics* 22: 1540-1542.

ycorrhizal symbiosis leads to rarity in an endangered orchid. *Mol. Ecol.* 19: 3226-3242.

oral variation in temperature and rainfall differentially affects ectomycorrhizal colonization at two contrasting sites. *New Phytol.* 139: 733-739.

et ja ECM kolonis kui põua poolt mittekahj ALADE puudel. ECM kooslus erine **ITS1F-ITS4 + 2 RE** **multidimens** skaleerimim in a single stump of *Picea abies*. *Mycol. Res.* 105: 183 - 189.

ria species using DNA sequence from *Laccaria proxima*. *Mycol. Res.* 100: 1515-6 RE, southern blot **southern blot + RFLP** põhjal n and promise **evolutsiooniline ökoloogia taimedel: olulised agr evolutsiooniline** ökoloogia taimedel: olulised agreg-mustrid alates regionaalsest ja riiklikust skaalast ning v evisited with special emphasis on the enigmatic distribution of **Nothofagus Uus-Kaledoonias** arv levinud Uue-Meremaalt kunagise maismaatihenduse kaudu 70 MAT neid *Methods*. Version 4. Sinauer Associates, Sunderland, MA.

Bot. 20: 333- **Uus-Meremaale naturaliseerunud taimed: sh Dipi Uus-Meremaale** naturaliseerunud taimed: sh Dipterokarpused L-Am-st; tammed, pajud, paplid, haab; *Nyct* **Pisonia brunoniana (soe lõunapoolkera parasvöö)** *Pisonia brunoniana* (soe lõunapoolkera parasvööde, rannikul NZL AUS; OCE) lindude abil levik, P. Umbe ications for Biological Control of Root Pathogens.

am oxysporum and on Douglas-fir seedlings. *Phytopathology* 73: 384-389.

erence and model averaging in behavioural ecology using Akaike's information criterion. *Behav. Ecol. Sociobiol.* 65: 13-21. **mudelite valik**, võrdl G. 2004. Clades, clocks and continents: historical and biogeogr. **Myrtales: pms** klaadid tek 110-100 MAT eiteakus, ent Lõuna-Ameerikas enim basaalseid rühmi; Myrtaacea ationship: new perspectives on the null-hypothesis. *Oikos* 121: 321-326. **log-ratio** transformat r the ability to form ectomycorrhizas in the F1 progeny of an interspecific poplar (*Populus* spp.) cross. *Mycorrhiza* 10: 237-240.

ungi as regulators of soil C dynamics in ecosystems under global change. *Funct. Ecol.* 22: 955-963.

Kooslused on määratud eelkõige ruumilise kauguse poolest (ligi 50%), ent horisondil pole mõju! Mulla pot ensümaatilist aktiivsust mõj eelkõige l ( *A. glutinosa* ) in Fennoscandia. *New Phytol.* 73: 529-546. **Lepp levis Eesti ja Skand aladele** ulatuslikult 7000-6000 a BC; mägilepast pole P-Eur mingi st trees in the Usambara mountains of Tanzania: correlations with **Tansaania Udzungwa mägedes** puude fülogeneetiline BD liigi ja perek tasemel väheneb, ent suguk ja seltsi **2 RE, õnnestumisast** PCR-RFLP **Sekv 97.0% ITS** kriteerium

spp; *Robinia* plaju: *Tomentella stuposa* ja *T. ellisii* **peroksida**: root-root-specific peroxidases during development. *Eur. J. Biochem.* 268: 86-92.

microarray for the study of functional gene diversity in the nitrogen cycle in the environment *Appl. Environ. Mic* **nir\*\*:** 70 nu **nir\*\*:** 70 nu probed cy5, cy3; n=(3)\*2; kõva r proderma

f the polyploid species *Syst. Bot.* 28: 723-737. **trnH** praimer **süsteemaatika**: DNAl põhineva eeldu: xonomy. *Trends Ecol. Evol.* 18: 70-74.

ld. *Mycologist* 19: 102-112. **EeM taimede** biogeograafia: männilised, dipterokarbid, tsesalp, pöögilised. *Cortinarius*: pms parasvöötmes. oliv-alb, Russ ochroleuca, Pilod sp; Dolomiidi lisamine: *Amphinema*, *Tomentella* loobuti ies level patterns in C and N abundance of ectomycorrhizal and saprotrophic fungal sporocarps. *New Phytol.* 159: 757-774. isotoopidel kui fn rühmi e-labelled (15N and 13C) glycine by mycorrhizal pine seedlings. *New Phytol.* 164: 383-388.

andance in fruit bodies of ectomycorrhizal fungi from boreal forests. *New Phytol.* 136: 713-720.

it, 4 pöögikut Euroopas; *Laccaria amethystina* liigisisene: väga väikesed genetid **loobuti**; **RAPD 2** praimerit: *Laccaria amethystina* **orgaanilis** arutelu **loobuti**

s. *New Phytol.* 177: 845-847. **ITS1F/cNL2F** (seenespets, k1100bp) **3 RE, täpsus** RFLP **mutualism** by two nonphotosynthetic orchids. *Proc. Natl. Acad. Sci.* 94: 4510-45

vipes, *Lactarius rufus*, *Amanita franchetii*, 0/17st Pezizales; inokpot: *Rhizopogon* 2 RE; sekv RFLP-tüüpidel mch ja ITS  
ogenetic bias in fungal environmental clone library construction. *Environ. Microbiol.* 9: 1329-1334. eri kloneerimismeetodid annavad mõnede liikide arvukuse  
es for improved characterization of basidiomycetous orchid mycorrhizas. *New Phytol.* 163: 217-221. primerid kandseentele, Tomentellale, Tulasnellale tuvastamiseks mullast. ITSO, ITS4-OI  
view of the past 8 years of DNA barcoding. *Mol. Ecol. Res.* 12: 377-388. barcoding: ajalugu, kriitika  
tion, speciation and classification. *Annu. Rev. Phytopathol.* 37: 197-246.  
2000. Phylogenetic species recognition and species concepts in fungi. *Fungal Genetics and Biology* 31: 21–32.  
robres, species recognition and the geographic limits of species: Liigikriteeriumid seentel ja kuidas liikide arv kasvab morfo- Liigikriteeriumid seentel ja kui  
robres, species recognition and the geographic limits of species: seenetaksonitel v konkreetsed biogeo mustrid ja allopatriline liigiteke mol andmete põhjal. I  
ring the gamet Rhynie Cherti taimede elukäik: sporofiitid ja gar Rhynie Cherti taimede elukäik: sporofiitid ja gametofiitid faas. Algselt AM-seened koloniseerisid kogu tal  
tions for biodiversity conservation in Cameroon. *Tropenbos Car Kameruni lõunaosas* on tsesalpiiniliste üks BD koldeid. Eriti madalates mägedes ja jõeartees palju endemis  
onito GM, Veldre V, Jairus T, Ryberg M, Larsson K-H, Kõljalg U. 2011. Tidying up International Nucleotide Sequence Databases: ecological, geographical and sequence  
H, Hillebrand F, Abarenkov K. 2015a. Performance of nine primer pair and genetic marker combinations in high-throughput sequencing of fungi. *MycKeys* (pending review  
nd F, Abarenkov K. 2015a. Performance of nine primer pair and genetic marker combinations in high-throughput sequencing of fungi. *Science* (pending review)  
hic interactions in Pezizomycetes (Ascomycota, Fungi). *Mol. Ecol.* 22: 1488–1493.  
of ectomycorrhizal fungi? Re-evaluation of Gao et al. (2013) data sets reveals sampling effects. *Mol. Ecol.* 23: 992-995.  
rianjohany E, Razafimandimbison S, Sadam A, Naadel T, Kõljalg U. 2011. Spatial structure and the effects of host and soil environments on communities of ectomycorrhiz  
fungi. *Science* 234: 1078.  
al biogeography of the ectomycorrhizal /sebacina lineage (Fungi, Sebaciales) as revealed from comparative phylogenetics analyses. *Mol. Ecol.* 23: 4168–4183.  
I, Nara K, Nouhra E, Peay KG, Pölm S, Ryberg M, Smith ME, Kõljalg U. 2012. Towards global patterns in the diversity and community structure of ectomycorrhizal fung  
us T. 2009. Establishment of ectomycorrhizal fungal community on isolated *Nothofagus cunninghamii* seedlings regenerating on dead wood in Australian wet temperate f  
iversity of peizizalean ectomycorrhiza. *New Phytol.* 170: 581-596.  
e analysis, field observations and synthesis experiments suggest that *Odontia* is a non-mycorrhizal sister genus of *Tomentella* and *Thelephora*. *Fung. Ecol.* 11: 80-90.  
ectomycorrhizal fungi and roots across substrate layers including coarse woody debris in a mixed forest. *New Phytol.* 159: 153-165.  
iversity, distribution, and evolution of phylogenetic lineages. *Mycorrhiza* 20: 217-263.  
g host plants explain differences in fungal species richness and community composition in ectomycorrhizal symbiosis. *New Phytol.* 199: 822–831.  
aa K. 2012. Enzymatic activities and stable isotope patterns of ectomycorrhizal fungi in relation to phylogeny and exploration types in an afro-tropical rain forest. *New Phyt  
ectomycorrhizal fungi.* *New Phytol.* 185: 351-354.  
associated with ectomycorrhizas: molecular diversity and ecology with particular reference to the Helotiales. *Environ. Microbiol.* 11: 3166–3178.  
nycoheterotrophy in understory Ericaceae and Orchidaceae: ecological evidence for mixotrophy in Pyroleae. *Oecologia* 151: 206-217.  
tomycorrhizal symbionts associate with Gnetum gnemon (Gnetophyta) in Papua New Guinea. *Mycorrhiza* 22: 663-668.  
nd high host preference of ectomycorrhizal fungi in Western Amazonia, a neotropical biodiversity hotspot. *ISME J.* 4: 465-471.  
elles: diversity patterns and host shifts from the native *Vateriopsis seychellarum* (Dipterocarpaceae) and *Intsia bijuga* (Caesalpinaceae) to the introduced *Eucalyptus rob  
riciella* (Hymenochaetales, Basidiomycota) on Caesalpinaceae, Dipterocarpaceae and Myrtaceae in Seychelles. *Mycol. Progr.* 6: 101-107.  
ty composition of ectomycorrhizal fungi on seedlings of *Picea abies* and *Betula pendula*. *Environ. Microbiol.* 10: 1189–1201.  
fungi of *Alnus*: differential host specificity, diversity and determinants of the fungal community. *New Phytol.* 182: 727-735.  
of ectomycorrhizal fungi in a wooded meadow. *Mycol. Res.* 110: 734-748.  
nia, Seychelles and Australia. PhD Thesis. University of Tartu, Estonia. 22.627417  
, Bergeron Y (eds.). *Handbook of Forest Ecology*. Routledge Publishing, Milton Park, UK. (in press)  
ut in a silvopastoral system. *Biol. Fertil. Soils* 43: 843-848.  
morphospecies. *Science* 312: 1015 diatoomide metapopulatsioonidel on kindel regionaalne biogeogr struktuur. Arv metakoosluse protsessid or  
undance  $\delta^{15}N$ : indicators of relative rates of nitrogen cycling in temperate forest ecosystems. *Oecologia* 153: 399-406.  
rees about gene flow and population history. *Mol. Ecol.* 7: 381 fülogeograafia populatsioonidel: ülevaade ja statistik fülogeograa fülogeograafia populatsi  
, Ashton PMS. 2005. Ectomycorrhizal colonization and seedling; Allocasuarina all palju seeni, mis samad eukalüptide ja akaatsiatega; Casuarinade all v vähe liike ja harva  
ethod to relate two community compositions. *Ecology* 85: 834-846 (abstract). CoCA kahe eri org koos  
/indows user's guide: software for canonical community ordination (version 4.5). Ithaca: Microcomputer Power.  
ntinental-scale patterns of canopy tree composition and function Amazonia taimekooslused on eri L-Am osades veidi erinevad pms leguminooside ohtruse poolest. EcM pu  
ia highland area: a brief overview. In: ??? Plant diversity in Gua; Guyanas veget sõltub tugevasti kõrgusest. Dicymbe Kesk- ja Lääne Guyanas madalates j akõrgemates mets  
tegy in Guyana. *Biodiv. Conserv.* 7: 1457-1483. Guyanas metsatüübid. EcM metsad levinud valge liivaga toitainetevaestel muldadel Kesk-Guyanas ja Lõun  
n a National Protected area strategy in Guyana? *Biodiv. Conser* Guyanas eir veget-tüübid. Eriti keskosas ja Lõunaosas EcM-domin metsad, er Swartzia lokaalne rikkus ja c  
cal and regional scales. *J. Trop. Ecol.* 14: 645-664.  
wo Amazonian treelets. *J. Trop. Ecol.* 15: 751-763. Neea on väikeste gäppide pioneerliik, mis peale idanemist talub hästi varju  
nte viljakehade koguproduksioon noores vs vanas metsas, ülevaade  
seedlings of *Pinus sylvestris*. *Eur. J. For. Pathol.* ???: 404-413.  
nte viljakehade arv liigiti: noor vs vana mets  
g phylogeny, environment and space to explore variation in macroecological traits of Viperidae and Elapidae (Squamata: Serpentes). *J. ruumiliste ruumiliste ja fülogen  
sterangium; au peale kobraste poolt põhj üleujutisi säilib sadakond aastat metsa asemel kõrgerohu-niit, kuhu okaspuud tagasi ei leviarv seetõttu, et niidul pole ECM-seente  
la J. 2013. Ploidy-specific symbiotic interactions: divergence of mycorrhizal fungi between cytotypes of the *Gymnadenia conopsea* group (Orchidaceae). *New Phytol.* 199  
-A. 2015. Two widespread green Neottia species (Orchidaceae) show mycorrhizal preference for Sebaciales in various habitats and ontogenetic stages. *Mol. Ecol.* 24: 112  
ination capability of four *Epipactis* species (Orchidaceae) is broader than expected from adult ecology. *Am. J. Bot.* 99: 1020-1032.  
ter patterns of mükoriisa võrgustikud: seemikute kasv parim kui www olemas ja kaugus puust nii et ei varjuta, aga mükorisofäärid kattuvad  
etween Pseud www: transport väga vähene, sporaadiline, ei sõltu taime suuruselt ega fotosünteesitava C kogusest, ent on olemas seeneliigist (*Rhizopog  
xina* rehmii, www olemasolu suurendab seemikute elumust 26% . Seemikutesse jõudis 0.0004% teiste puude süsinikust ehk 0,0063% seemikute sü  
Can. *J. Bot.* 65: 419-431.  
ire of mutualis network-anal:  
ociations of *Pinus radiata*. *Aust. J. Bot.* 17: 59-67.  
ations of *Pinus radiata*. *Aust. J. Bot.* 19: 13-20.  
mycorrhizal fungi. *Soil Biol. Biochem.* 5: 765-771.*

Casuarina (sh. equisetifolia), Allocasuarina kui Eucalyptus liikidel. Casuarina liikidel EcM kolonis väiksem ja tihti nõrgalt arenenud HN. Suiloidid ei nakata ühtki. Optimaalsus in relation to soil organic matter cycling. Biol. Fertil. Soils 46: 215-225. lakaas: e a. Sydowia 8: 381-390.

ja viisid kuidas sekotioidsed ja maaisest viljakahedega vormid on arenenud maapealsetest nii kott kui kandseened. Arv põhjuseks p. põhjused ja viisid kuidas sekotioidsed )

n arbuscular n EcM seente mütseelimatid ja nendega seotud noored puud võimaldavad mändidel rohumaid invadeerida. Samas tammedel ja rohumadel väga madal inokp as erinev; veidi erinev ka peale Ps. Fluorescens inokul ja fungitsiid imazolil kasutamist. PsF ise väheneb aja jooksul tunduvalt

Uapaca guineensis ja Afzelia africana puistutes: domin Russula/Lactarius, Boletaceae, Amanita. Vähesed liigid kattuvad eri peremeestel. Arv et liigirikkus võrreldav par Senegali EcM taimed: Uapaca spp, Afzelia, Anthonotha (Caesalp), + introduts liikidel (sh Cinnamomum sp, Lauraceae).

lanicus (Gyrodontaceae) in Senegal. Agric. Ecosyst. Environ. 28: 519-523.

hiziques des plantations d' exotiques du Haut-Shaba (Republique du Zaïre). Bull. Rech. Agron. Gembloux 9: 215-227.

ical Africa. In: Isaac S, Frankland JC, Watling R, Whalley AJS Aafrika EcM puud perekondade ja liikide kaupa, võib-olla ka Salix ja Allophylus. Enim EcM puud on Gui 8.

EcM süntees ja kirjeldused Picea istandikus; Type5 = MelinioM. bicolor

rhizal genus Cortinariaceae from India and its phylogenetic position based on ITS and LSU sequences. Mycol. Res. 106: 245-251. Anamika gen nov Indiast Hope risation of fungal endophytic morphospecies associated with the indigenous forest tree, Theobroma gileri, in Ecuador. Mycol. Res. 112:852-860

BRA cerrado mikoriisne staatus: kõik AM, v.a. Campomanesia; BRA cerrado mikoriisne staatus: kõik AM, v.a. Campomanesia coerulea (Myrtaceae) ja Bauhinia holophy koevolutsoon igapäevaselt ja o

sis platyphylla in a woodland site. New Phytol. 92: 103-114.

henemine 3, 6, 12 kuu jooksul

: the effect of s peremees-parasiidi interaktsioonide modelleerimine metapopulatsioonide tasandil: pole superpatogeene; patogeensusgeene rohkem kui peremeestel resistant pulation. Scien parasiidi-peremehe koevolutsoon; tasakaal: resistentsed populatsioonid ründavad agressiivsemad vormid ja norku vorme avirulentsemad tualists and parasites in a community context. Trends Ecol. Evol. 22: 120-126.

tr mycorrhizae and Rhizobium on the growth and nitrogen fixation by black locust, Robinia pseudoacacia. New For. 25: 125-131.

ganic nitrogen by ectomycorrhizal fungi (Hebeloma spp.) of arctic and temperate origin. Mycol. Res. 102: 1525-1532. aminohap

rough improved access to discrete organic nutrient patches of high resource quality. Ann. Bot. 89: 783-789.

nce in evaluating plant phylogeographical hypotheses in the No Põhja-poolkera tertsiaaris: taimekooslused, nende liikumine, ookeanide sulgumine, temperatuur, niiskus.

much as resou Liigirikuse mõju funktsionaalsusele ja biomassile tüüseb aastatega samas kui N-lisamisel ja häiringutel vähenev või ei muutu. Eskale ecade-long gra taimede bioloogiline mitmekesisus põhjustab pikemaajalist koosluse prod stabiilsust

gy 75: 2-16. niidutaimed: eri koloniseerimine, suremus, konkurents võimaldab koeksistentsi

0-363. rohumadel suurem liigirikkus tagab stabiilsema keskkonna ja biomassi nii põuatingimustes kui sellest taastudes (kiirem taastumine). Samas liigisisene biom

or general prin diversiteet vs stabiilsus: ülevaade taimede kohta. Arv mitmekesisemad ökosüsteemid on resistentsed invasioonidele. Teoreetilisel mitmekesisus suurenda

biodiversity No Zambezi jõgikonna taimkattetüübid: levik ja kaitse; Zambezi jõgikonna taimkattetüübid: levik ja kaitse, iseloomustus

svusi kiikide arvus pole laiuskraadi mõõda ega taimeliikide koosluste vahel

DL. 2012. Distribution and drivers of ectomycorrhizal fungal communities across the North American Arctic. Ecosphere 3(11):111.

seente BD väheneb põhjapoolle, lihheniseerunud seentel mullaseened Kanadas NAAT transektil: EcM seente BD väheneb põhjapoolle, lihheniseerun 333-334. vereimejate spetsialiseerumine teat linnuliikidele: mis on põhjus? Kas aerodüün, füsiol või mitte-kokkujuhtumine?

tact Scots pine – Suillus bovinus and – Paxillus involutus mycorrhizospheres developed in natural forest humus. New Phytol. 138: 355 – 366. PPO, laka

il diversity in Scots pine ectomycorrhiza from natural humus microcosms using is x

Suillus spp. and different Pinus sylvestris genotype combinations: identity and 315-319

320-321

esteraas, i

esteraas, i

plant commun Pyrola suur indikaatorväärts -näitab kuusemetsa; metsasuksesioon Kanada joeäärsetes metsades

10. Global patterns and predictors of marine biodiversity across taxa. Nature 466: 1098-1103.

: drive diversit suurem seente arv mikrokosmis induts kiiremat substr lagunemist, kuna ühed seemned induts teisi. BD efekt suurem tselluloosil vrd kee

. fragments for phylogenetic studies within the family Photoseiidae. In: Sabelis M oribatida: triipkoodistamis; oribatida: triipkoodistamiseks sobivad nii ITS, kui arating the eff liigirikuse-pindala seose kuju mõjutab a; liigirikuse-pindala seose kuju mõjutab agregatsioon ja liikide katvu

it-fungus networks. Nature Commun. 5: 5273.

Network taimejuurte

alju EcM se networks: antagonistlike võrgustike struktuur ei sõltu laiuskraadist ega taksonoomiast. Enamik ntw meetrikutest sõltub maatriksi suuri

: DNA-based identification of ascomycetes and basidiomycetes in environmental ITS praimerid degener saitidega (liiga palju neid): ITS1F, ITS3 ja ITS4 pos-d

s üsna erinevad. Üleval vaesemas ja kuivemas domin Russ decolorans, Pilod fallax, Pilod reticulatum, Tylospora fibrillosa; allpool Tyl asterophora, Tomentella sp, Amphin

ling in temperate Australian woodlands. In: Hobbs RJ, Yates CJ, eds. Temperate eucalypt woodlands in Australia: biology, conservation, management and restoration. Surr propagated clones of Eucalyptus marginata inoculated with isolates of Pisolithus tinctorius. New Phytol. 111: 209-214.

omposing fungi. FEMS Microbiol. Ecol. 40: 13-20.

OH\*

and P transfer EMH kasv on jõudsam vähesema mulla P korral; väga tugev seos EMH koguse ja taim P vahel

s with basidiospores of Pisolithus arhizus, Rhizopogon roseolus and Suillus collinitus. Ann. For. Sci. 51: 521-528.

in tropical low monodominants troopikapuudel. Levinud laiguti kõikjal, pms EcM taimedel, ent er L-Am ka AM taimed. Gilbertiodendron Kongos: mets v varjukas (ka g; omycorrhizal Hypothesis. Biotropica 31: 220-228.

:Rhodesia. J. I Zambia Copperbelt miombo ; vs varane põletamine vs hiline põletamine. Domin Brachyst, Julbern, Uapaca spp, Marquesia paiguti. Põletamine vara vähesi ersity, Ecology, and Conservation of Truffle Fungi in Forests of the Pacific Northwest. USDA general technical report PNW-GTR-772.

sperms from an evolutionary standpoint. In: Safir RF (ed). Ecophysiology of VA Plants. 224 pp. CRC Press, Boca Raton, FL.

mmivena potorooi gen. et sp. nov. (Basidiomycota, Mesophelliaaceae), with a key to the 'gummy' genera and species in the Mesophelliaaceae. Australas. Mycol. 21: 9-11.

6: Stephensia bynumii sp. nov. (Ascomycota), with a key to the species of Stephensia. Mycotaxon 55: 185-188.

Stephensia bynumii, sp nov

alajczuk N. 2013. Australasian sequestrate fungi. 18: Solioccus polychromus gen. & sp. nov., a richly colored, tropical to subtropical, hypogeous fungus. Mycologia 105:

1 covered by the northwest forest plan. Mycotaxon 75: 153-179.

Fevansia gen. Nov -lähedane R

alahari: ecology, ethnomycology, and taxonomy. Econ. Bot. 62: 521-529.

Kalaharituber ökoloogia ja kast

alian outback: ecology, ethnomycology and taxonomy. Econ. Bot. 62: 497-506.

Elderia arenivaga, Ulurua nonp



is viljakehadeg arv maasis viljakehadega seened tek kohastumusena per põuale, aga ka külmale. EcM seenete tekkearv langeb kokk arv maasis viljakehadega seened tek  
fles of the Australian Outback and African Kalahari. Mycol. Progr. In press.  
fles of the Australian Outback and African Kalahari. Mycol. Progr., in press.  
606.  
loydia 27: 100-106.  
*Hebeloma, Suillus* and *Astraeus*. For. Sci. 13: 121-130.  
i. Trans. Br. Mycol. Soc. 57: 85-92. **Carbomyces** (Carbomycetaceae); Te  
rhizae. USDA Forest Service: Washington USA. pp. 19-37.  
ologic theory. **A.B. Franki panus ektomükoriisatöödesse. Juba 1840**ndatel kirjeldati EcM struktuure, ent seeni peeti parasiitideks. Frank oli esimene, kes tuli välja vastastil  
its relationship to the other sequestrate genera in Morchellaceae. Mycologia 102: 1058-1065. **Kalapuya**, monofüleet Imaia-La  
f fungal rhizomorphs under nitrogen fertilization in a pinyon-juniper woodland. Plant Soil 270: 249-255.  
ecosystems 9: 305-316.  
id by ectomycorrhizal fungi in a boreal forest. Soil Biol. Biochem. 40: 1964-1966.  
lutionary histories of soil fungi are reflected in their largescale biogeography. Ecol. Lett. 9: 1086-1093.  
**olutionary histories of soil fungi are reflected in their large-scal** Seenehõimkonnad erinesid keskmise distantsi poolst ekvaatorist Ameerika latituudi gradie  
nents of ectom **vaidavad, et ECM-seened saavad viljakehade C taimedelt kohe, e** x  
to test use of litter carbon by ectomycorrhizal fungi. Soil Biol. Biochem. 38: 1077-1082.  
lization in boreal ecosystems: potential consequences for soil carbon storage. Glob. Change Biol. 13: 78-88.  
us, and atmos **mükoriisa väheneb N ja P (tugevamini) väetades**, kasvab CO2 mõjul: metaanalüüs  
**metsades domin** Cortinarius, Russ/Lact; Boletus, Inocybe. Muul PNG metsade EcM taimed: rannaäär -Casuarina, Leptospermum; Kuiv igihaljas mets -Myrtaceae, Acacia; ;  
In: Misra JK, Tewari JP, Deshmukh SK. Systematics and Evolution of Fungi. Science Publishers: Jersey, UK, pp. 15-28.  
In: Misra JK, Tewari JP, Deshmukh SK. Systematics and Evolution of Fungi. Science Publishers: Jersey, UK, pp. 15-28.  
vahel sarnasemad kui tammeliigid omavahel. Sissetoodud puuliikidel sama plaju EcM BD kui kohalikel puuliikidel. Plotte reostavad naaberplottide  
identity determ **EcM seeneliigid mõjutavad erinevalt EcM** juurte hingamist. Peamine mõjutaja oli siiski juuretippude N sisaldus, mis erines tugevasti ;  
phaeum, H.helodes, Tomentella lilacinogrisea  
dophora finlandica, Tuber sp. Ka Pulvinula constellatio ja Tricharina ochroleuca  
P, Mabilat C. 1999. Mycobacterium species identification and rifampin resistance testing with high-density DNA probe array **Mycobacterium**: 4 eri geeni rDNA, sh 16S rR  
pacity to degrade and solubilize 14C-labelled lignin. Microbios 50: 91-97. ligninaasi  
hiza epidermoides, Cortinarius sp; noorendusega: Tylospora (49%), P. Epidermoides, Cenoc, Piceirh cornuta  
Laccaria sp, Tomentella spp, Peziza spp, incl P. Alaskana (pigem tiivest eemal)  
abundances support the myco-heterotrophic nature and host-specificity of certain achlorophyllous plants. New Phytol. 160: 391-401.  
le isotope rati **Arv et korge 15N liigid on S strateigid suure EMHga ja mad 15N liigid R-strat limit EMHga**  
**Wroclaw: Salix mood EcM; Alnus ja Polygonaceae NM**  
**Wroclaw: Alnus glutinosa, Betula EcM ja AM; Carpinus, Corylus, Picea, Tilia ECM; Frangula alnus, Ribes subaeratus, Sorbus aucuparia mood Ec**  
ity of microbia **Lepp on mikroobide poolst mitmekesiseim ja aktiivseim kooslus**. Eri koosluste vahel mõj mikroobe enim %Orgaanika, %N, pH **Lepp on n**  
ogés suivi de laur monographie, et accompagne de planches. C. R. Hebd. Seanc. Acad. Sci. Paris 21: 1432-1436.  
ées, observés dans les environs de Paris et les départements de la Vienne et d' Indre-et-Loire. Ann. De la Soc. Nat. 19.1.  
. Mycorrhizal association between the desert truffle Terfezia boudieri and Helianthemum sessiflorum alters plant physiology and fitness to arid conditions. Mycorrhiza 21: ;  
nocolation with the ectomycorrhizal fungi Pisolithus arhizus and Scleroderma sp. improves early growth of Shorea pinanga nursery seedlings. New For. 30: 67-73.  
tke I. 2001. Carbon dioxide concentration and carbon input affect the C and N storage pools in Amanita muscaria-Picea abies mycorrhizae. Tree Phys. 21: 93-99.  
on in Suillus luteus mycorrhizas-as revealed by micro-PIXE analysis. Nucl. Instr. And Meth. In Phys. Res. B 181: 649-658.  
id the West Pacific. J. Biogeogr. 28: 217-230. **taimede ja putukate** biogeogr S, SE-Aasias, Austraalias ja Okeaanias **PAUP analüüs** biogeograafias  
relationships among cyanobacteria and plastids by small subunit rRNA sequenc nu-ssu-517f primer  
9.  
rius (19), Russulaceae (17), Inocybe (13). Liikidest Rhiz vinicolor, Cenoc  
**pöök vs valgej tamm vs pöök vs valgepöök: ektomükoriisaseened on veidi spetsiifilisemad kui saprotroofid, täielikke spetse väga vähe**  
ure of tropical host-parasitoid food-webs. Nature 445: 202-205. **mesilaste ja parasitoidide toiduahela võrgustiku muutused seoses maakasutusega: muutused**  
s in soil. Can. J. Bot. 61: 1345-1348.  
ns. Mycologia 59: 819-832. **Stephensia**=Densocarpa shanor  
e common ectomycorrhizal symbionts in Northern Hemisphere forests. Mycorrhiza 22: 577-581. **Membranomyces** on Clavulina  
tekkel ning lagundamisel  
d, säilib vaid Hartigi võrgustik. Vee all tekkivad uued mükoriisad omavad vaid Hartigi võrku.  
a of Glacier Bay, Alaska. In: Trappe JM, Franklin JF, Tarrant RF, Hansen GM (eds.) Biology of Alder. Pacific Northwest and Range Experiment Station Forest Service, U.  
lacier Bay, Alaska. 115-139.  
*rmocybe crocea* on *Pinus sylvestris* and *Dermocybe palustris* on *Pinus mugo*. Nova Hedw. 45: 509-527.  
ct of arbuscular mycorrhizal fungal communities from ecosystems along management gradient on the growth of forest understorey plant species. Soil Biol Biochem. 41: 214  
rsch. Freunde Berl. 253-289  
alysis. Oikos 1 **Nestedness: pea kõik kooslused on nested** ja see on loodusl normaalne, käib kaasa koevolutsiiooniga. Andmete kc **Nestedness**: pea kõik  
ecies co-occurrence. Oikos 116: 2053-2063. **nestedness ja co-occ**  
onservatism, phylogenetic assortment and habitat filtering. Meth. Ecol. Evol. 3: 930-939. **Niche proge**. Null m  
acelerated by monokaryons and dikaryons of Lenzites betulinus and Trametes hirsuta. Mycoscience 40: 367-371.  
ome ectomycorrhizal fungi. Mycorrhiza 1: 13-20.  
*ra verrucosa* complex: new insights from analyses of beta-tubulin, large subunit nuclear rDNA and ITS sequences. Botany 86: 742-7. **Chaetothyriales**: Phialophora, F  
tler M. 2011. Species abundance distributions and richness estimations in fungal metagenomics - lessons learned from community ecology. Mol. Ecol. 20: 275-285.  
id mycorrhizal fungus Rhizoscyphus ericae and a leafy liverwort in the maritime and sub-Antarctic. New Phytol. 176: 460-471.  
tahl DA. 2003. Optimization of single-base-pair mismatch discrimination in oligonucleotide microarrays. Appl. **2le organisn 2le organismile tihed** **Neural Network** (mitteli  
discrimination of terminal mismatches by using oligonucleotide microarrays and neural network analyses. Appl. **2le organisn 2le organismile tihed** **ANOVA-SNK**; Neural 1

studies on terricolous microfungi reveal novel anamorphs of two Tuber species. Mycol. Res. 108: 749-758. Tuber anamorfid: iseloomustus, sarn

enoc, Lact deliciosus; muidu Russ-Lact (5), Tom-Thel (4); EcM-kaas eraldi praimerid Capronia, Hymenoscyphus, Porteri AscoM, Phialocephala f

cina on assots arv Sebacina on assots mitmete kottseentega, sest neid on alatihti Sebacina ITS,LSU ECM liigid 2 klaadis

E. 2009. Diversity and evolutionary origins of fungi associated with seeds of a neotropical pioneer tree: a case s DOTUR ja Sequen seemnete endofüüdid on eri per

graphical structure of endophytic and endolichenic fungi at a continental scale. Am. J. Bot. 99: 898-914.

als close affinities between endophytic and endolichenic fungi in mosses and lichens. Microb. Ecol. 60: 340-353.

short-rotation Lepp: peenjuuri 550+-105 kg/ha; u 50% -10 cm ja 75% -20 cm süg. Juurte biomass 18% kogumassist. Aastas viib mulda 30-60 kg N/ha. Valge lepp paljulul

Thelephora, Tuber

gev must pigment) Wilcoxina, punaneAsco, Hebeloma, Thelephora, Tuber istandikus vs puhaskult (v a Hebeloma)

d from hair roots of Rhododendron obtusum var. kaempferi in a Japanese red pine forest. Mycoscience 44: 97-102.

by the root endophytic fungus Heteroconium chaetospira within roots of Rhododendron obtusum var. kaempferi. Mycorrhiza 15: 61-64.

rib oma shiro-aladel; shiro-alal vrd ümbrusega kõrgem b-glükosidaasi akt shiro-ala

weeks are required to differentiate ectomycorrhizal Hartig net structures in roots of Pinus densiflora seedlings cultivated on artificial substrate. J. For. Res. 5: 293-297.

ic potential of Tricholoma matsutake: growth over pine bark treated with surfactants. Mycorrhiza ???

hization of Tricholoma matsutake and two major conifers in Finland - an assessment of in vitro mycorrhiza formation. Mycorrhiza 20: 511-518.

ng gel electrophoresis of amplified ribosomal DNA. Mycol. Res. 104: 927-936. PCR otse mullast 18S rDNAle PCR otse mullast 18S rDNAle, geelektroforeesil lahutar

rdary. Science 303: 1489. krriidi-tertsiaari piiril peale asteroidi mõned (?) aastad valitsesid palüoloogilistes andmetes vaid seeneseose

agard E, Bass M, Losos EC, Balslev H. 2004. Yasuni Forest Dynamics Plot, Ecuador. In: Losos EC, Leigh J, Giles E, eds. Tropical forest diversity and dynamism: Finding

K, Losos E, M Yasuni ploti kirjeldus

sp?; tundmata liigid, palju Pezizaleseid (väidetavalt mitu Tuberit, Peziza infossa j ITS1F-4; 3RE

Ecol. Evol. 24: 110-117. triipkoodistamise geenide valik

hofaguse metsades: invasiivsed liigid Pinus radiata istandikest: Amanita muscaria, A. Rubescens, Pax involutus, Xerocomus rubellus; kohalikest liikidest domin Cort, Tricl

ARRAY seente identifi UPGMA

arative analysis Fül koosluse str: klasterdumine on domineeriv pooltes maailma kooslustes, ent tugevam kõrgemal taks Fül koosluse str: klasterdumine

Mycorrhizal weathering: A true case of mineral plant nutrition? Biogeochem. 49: 53-67.

e MW. 2005. An overview of the phylogenetic relationships within Epidendroideae inferred from multiple DNA regions and recircums Orhideed Epidendroideae: ITS pikku

enced by both stochastic and deterministic ecological factors. Environ. Microbiol. 10: 1411-1418.

icrobiol. 64: 167-182. prokariotoidel liigirikkus-pindala seos madalam, ent võib olla sarnane taimede ja loomadeg

ECM BD vs k ECM: Salix: eri kk-tingimused PCA

rrhizal plant influence effectiveness of the mycorrhizal symbiosis? Plant Soil 230: 161-174. repeated ANOVA

ngi of Salix re Eri strateegiad: osad stimul kasvu (root stimul), teised asendavad juuri (suur kolonis, madal kasvustimul; root replacement). eri ECM seemned annavad taimed

d; vs N, P sise ECM vs VAM: Salix repens; vs kk-tingimused, aastaajad

mycorrhizal in ECM vs AM: kevadel vs sügisel, ajas

soil microbes: hüpotees: mikroobide BD on suurem tähtsus vaestes ökosüsteemides kui rikastes

ir mycorrhizal AM eriseened eritaimedel MANOVA, AM-sõltuv

rrhizal fungal mükoriisa võrgustikud: seemikud võivad saada kasu v kahju

ust, vähendab AM diversiteeti tõstab taimede BDD, biomassi, P sisaldust, vähendab mulla P sisaldust

ten K, Boller T AM seemned soodust P ülevõttu, mullastruktuuri (peatasid erosiooni), mitmete taimeliikide ellujäämist süsteemis ning taimeliikide ühtlust. Eri seemned mõjuta

nizal fungi alte 2 taime omavahelist konkurentsi mõjutavad eri-AM-seened, mis individuaalselt mõjuvad ka erinevalt. 3 AM-seene koostajate keskmine

ical invasions. invasiivsus mikroobidel, mis seotud taimedega v mitte. ↑ Augustis taimed investeerisid

RM, Kamp A invasiivne kõrs Cenchrus Botswanas on seotud vaid 1-2 AM seeneliigiga; positiivne-neutr tagasiside oma mullaga. Samas kohalikud liigid seonduvad rohker

abundance res kliimamuutuste mõju mikroobidele ja mikroob-taim suhetele. Ennustamine keskkonna ja omavaheliste suhete läbi

elowground n v oluline on urida interaktsioone laiemalt, mitte vaid 2 osapoole vahel, vaid kaasata ka muud seonduvad. Taim-patogeen + mükoriisa, antagonist, patogeen2.

FM, Bradford l mullaorganismid võivad mõj suktessiooni; taimed mõj läbi assots mikroobide teineteist;

09. Septal pore complex morphology in the Agaricomycotina (Basidiomycota) with emphasis on the Cantharellales and Hymenochaeta Kandseentel septumi parentesoc

New Phytol. 157: 525-537.

irts targeting the nuclear rRNA operon for characterization of arbuscular mycorrh AMF seentele 8 SSU ja LSU praimeri paari katsesused. NS31-AM1 amplifits

izas on the concentration and biodegradation of simple organic acids in a forest soil. Eur. J. Soil Sci. 54: 697-706. Paxillus k

ilate and ferricrocin exudation by the extramatrical mycelium of an ectomycorrhizal fungus in symbiosis with Pinus sylvestris. New Phytol. 169: 367-378. Hebeloma

corrhizal fungi and Pinus sylvestris in response to nutrient deficiencies. New Phytol. 170: 153-163. EcM seen

minerals muscovite and hornblende. New Phytol. 171: 805-814.

terization of rDNA AM-seente koosseisistents rDNA LSU

y Diverged Species: Relative Performance of Matching Methods. PLoS ONE 7: e30490. barcoding; keerulis; barcoding: keerulisem kui liigi

ive fungal colonization in plant roots. Science 295: 2051. uued seenespets praimerid 18S-le, Korrelise juurtest tohtu mitmekesisus seeni, millest pa

raheerimine ja seente ning bakterite sekveneerimine: DNA, rikastatud RNA ja rikastamata RNA 13C rikastatud süsinikuga taimedest RNA ekstrah

sting grass species have distinctive arbuscular mycorrhizal communities. Mol. Ec NS31-AM1; mõlemad märgist T-RFLP erijooksud erinevate tulet parsimoonia analüüs 100

thment: a meta 15N ökosüsteemide toiduahelates, metaanal: 15N prop sohtub enim eritatava N jaagi aineist, taimtoit=loomtoit>kodutoit, taksonoom kuuluvus, elupaik magev

EEK sand dune. Pedobiologia 36: 373-382.

1993. Element concentrations in certain ectomycorrhizal fungi in Finnish Lapland. Aquilo Ser. Bot. 31: 137-142.

Teravmägedel AM taimi pole, leiti vaid 1 AM eos. EcM taimed Dryas, Salix spp, Betula; ErM Cassiope, Empetrum. Sagedad DSE. 1 EcM tipp leiti Pedicularis dasythalt

izal and non-mycorrhizal Pinus sylvestris seedlings. Aquilo Ser. Bot. 26: 19-24

gatus as revealed by energy dispersive spectrometry. ???

idase and aryl-alcohol oxidase genes in 30 fungal species. J. Biotechnol. 83: 245 - 251. LiP, artüül

k alder (Alnus Lepp Sirgalas: lehed ja varred v N ja P rikkad. Must lepp v paljulubav karjääride rekultiveerimisel

ied in biological and chemical stump treatments in the fight against Heterobasidion annosum. Mycologia 95: 379-387.

Macromycetes de la región del medio Caqueta, departamentos de Caqueta y Amazonas (Colombia). *Biota Colombiana* 6: 127-140.

roots of conifer seedlings. *New Phytol.* 174: 441-446.

VE FEATURE **taimede-tolmeldajate spetsialiseerumine on asüm.** Põhjused (mitteorig): vaatlushälbed, proovialade hälbed, regionaalne kohastumine; väljasuremise risk, s pollinator inter network analüüs: taimede ja tolmeldajad: nullmudelite kasutamine, erinevad statistikud ja artefaktid. NullM2 on parim, ent nullM1 tul structure of plant-animal mutualistic networks. *Ecology* 90: 2039-2046. **fülogeneesi, ruumilis**

species abundance **network-anal.: liikide erinev ohrtus põhj** peamiselt asümmeetriat ökol suhete võrgustikus. Sagedasemad liigid mõj oma partnereid tuge fide kooslus muutub kui lisada lujja, eriti okaspuudelkasvavad vähenevad; mõned lisanduvad, mõned kaovad; ECM seentest *Amphinema* ja *Sistotrema octospora* eelistasi position and di puude elurikkus ei mõj lüljalgsete liigirikkust, ent eri aladel ja eritaksonitel esines puulügi efekt. Vaja uurida mitmeid kooslusi Federsoo L. 2013. Evolution of nutritional modes of Ceratobasidiaceae (Cantharellales, Basidiomycota) as revealed from publicly available ITS sequences. *Fung. Ecol.* 6: 2 its correlation with anastomosis grouping and ecology. Thesis. University of Tartu, Tartu.

facilitation. O väljend 'diversity begets diversity'. Konkurents ja fasilitats avaldavad samaaegset mõju liigirikkusele sõltuvalt sümmeetriast, ajast ja u : 183-206. Koosluseökoloogia põhikontseptsioonid on liigiteke, geenitriiv, looduslik valik, levimine; m ta (*Agaricaceae*). *Mycologia* 95: 442-456. **ITS, LSU** **Macrolepiota**, *Endoptychum*, *Chlorc* tions. *New Phytol.* 181: 960-973. **introduits ECM** seened: pms perek *Suillus*. Kokku 200 teada introduits liiki -ainult VK põhjal ons of ectomycorrhizal diversity and root structuring in seedlings of Norway spruce (*Picea abies*) with fast- and slow-growing genotypes. *New Phytol.* 201: 610-622.

tree effects on the ectomycorrhizal community and root characteristics of Norway spruce. *Mycorrhiza* 23: 21-33.

**PNG ECM** puud *Pimelodendron amboinicum* (*Euphorbiaceae*), **Haplobolus floribundus** (*Burseraceae*); dipterokarbid on ü hõredalt; Int **Lactarius** PNGs: madalates metsades: **PNG: Pimelodendron** (laikudena monodominant) mood ECM ja assotsieerub *Pterygellusega* (*Cantharellales*) tion of the world's biodiversity hotspots: the biota of African C: **Cape: taimed** levinud hiljuti üle mandrite, mitte Gondwana jäänukid; radiatsioon eri rühmac ate control: increasing your power. *Oikos* 108: 643-647. **Bonferroni** analoogid, m omy of root-inhabiting *Cryptosporiopsis species*, and *C. rhizophila* sp. nov., a fungus inhabiting roots of several Ericaceae. *Mycol. Res.* **Cryptosporiopsis** spp nov *Pezic* ; Franken P. 1998. *Piriformospora indica*, gen. Et sp. Nov., a new root-colonizing fungus. *Mycologia* 90: 896-903. **Piriformospora indica** -sarn 18S rDN

**Panama** maakitsuse formeerumine 3 MAT korreleerus Atlanti ookeanis suure väljasuremiste lainega 2,4 M l, Va-mäd ja P **ECM morfotüüpide suht arvukus ei erine** metsapinnasel, Va-mäd ja Pruunmäd lagupuidul, ent seenmanti paksus va-mäd puudul samade morfotüüpide kaupa obovata in the Altitudinal Gradient ( the Denezhkin Kamen' Mountain Ridge, Central Urals). *Sib. Ekol. Zh.* 15: 497-505.

3: 337-344. **puittaimed mõjutavad savannide mullastiku toitaineid.** Rohttaimede ja puude vaheline fasilitatsioon onomes and its consequences for bacterial community analyses. *PLoS One* 8:e57923. **Bakterite rDNA: 1-15** koopiat, pms 1-7; koopiate : P of ITS. *Mycol. Res.* 104: 1027-1032. **total DNA mullast**

rlequin ladybird carries biological weapons against native competitors. *Science* 340: 862-863. **Rhizoctonia: Ceratobasidiaceae**

izoctonia. *Annu. Rev. Phytopathol.* 32: 135-155. **Rhizoctonia: Ceratobasidiaceae**

Thanaophorus *praticola*. *Curr. Genet.* 18:277-280.

ally amplified ribosomal DNA from several *Cryptococcus* species. *J. Bacteriol.* 1 **LR1, LR3, LR5, LR6, LR7, LR7R, LR12, 5.8S, 5.8S-R** praimerite süntees ne oyster mushroom *Pleurotus* revealed by phylogenetic analysis: **Pleurotus ostreatus** kompleks: ristumise baasil morfoloogilised liigid on samad bioloogilised liigid, bioloogil sp, *Cenoc*, *Lactarius* sp

rom the *Hymenoscyphus ericae* aggregate and roots of *Pinus* and *Vaccinium*. *New Phytol.* 164: 183-192.

ns between ectomycorrhizal fungi and ericaceous plants. *Symbiosis*, in press.

**segamets-okasmets-nõmmemets; ECM** (eriti segametsas ja okasmetsas) vs saprotroofid (eriti AM-lehtmetsas) icolor peab mitu aastat vastu)

M-A. 2012. Extensive gene flow over Europe and possible speciation over Eurasia in the ectomycorrhizal basidiomycete *Laccaria amethystina* complex. *Mol. Ecol.* 21: 28 gal associates of *Pyrola rotundifolia*, a mixotrophic Ericaceae, from two Estonian boreal forests. *Mycorrhiza* 19: 15-25.

owland vegetation during the Late Quaternary: pollen evidence f **ZAMBIA-Tanz** piiriala taimkate on viimase 45000 a jooksul pidevalt muutunud sõltuvalt vihmaper pikkuses oyers BT, Renaut S, Rennison DJ, Veen T, Yeaman S. 2013. Mandated data archiving greatly improves access to research data. *FASEB J.* 27: 1304-1308.

fomentella

**llus, Coltricia**, *Inocybe*; keskiga: *Russula*, *Bankera*, *Lactarius*, *Cortinarius*; vana: **Russula, Suillus, Cortinarius, Hydnellum** **none**

5: 1861-1876. **inimasustus on viimastel ajal muutunud oluliselt nii N, C, S** tsükleid, levivad tehnogeensed ühendid ja raskemetallid. Globaalne soojenemine toimub pms fos through long-t **kõdulagunemine: iga puu varis laguneb** tema alal kiiremini kui teise puu all - arv mikroobikoosluste adaptatsiooni tõttu; Lehtede segu ) from the Dominican Republic and the status of *Neopaxillus* within the Agaricales. *Mycologia* 102: 138-147. **Neopaxillus** on *Crepidotus* sõs

ness determine the diversity and productivity of a tallgrass prairie system. *New Phytol.* 172: 554-562.

with a ligninolytic basidiomycete, but not root symbiotic ascomycetes, positively affects growth of highbush blueberry (*Ericaceae*) grown in a pine litter substrate. *Plant Sc* lated genes in *Eucalyptus globulus*-*Pisolithus tinctorius* mycorrhiza by differential **ECM geenid array** põhjal

ogenetic positioning of fungi: impact in applied microbiology and environmental biotechnology. *Appl. Microbiol. Biotechnol.* 90: 41-5 **seentel ülevaade.** Mikrosporiidi ification of thermophilic *Campylobacter jejuni*, *C. coli*, *C. lari*, and *C. upsaliensis* 1. *J. Clin. Microbiol.* 41: 4071-4080.\* **Campylobacter** spp identifitseerimiseks: 2 gee a species by microarray-based assay. *J. Clin. Microbiol.* 40: 4720-4728. **Listera** spp identifitseerimiseks: 1 geen, iga lii a tool for improved taxon identification and detection of species diversity. *Biodiv barcoding taimedele* (rbcL, matK, trnH-psbA ja seentele ITS

eri klassidel selged substraadi/elukeskkonna eelistused. Ringpuu diversity in environmental samples: pitfalls of PCR-based rRNA analysis. *FEMS Microbiol. Rev.* 21: 213-229. **erinev molekulaarse** analüüsi tulemus vrd reaalse olukorraa systems and time durations. *J. Biogeogr.* 27: 1151-1157. **Pleistotseeni** veetaseme kõikumised kuni -120m: Juba -40 m Sumatra, Jaava, Kra, Kalimantan omavahel üf ad graduaalselt lagundajatega, >12 mo domin kandseened (pärmid) ja liigirikkus kasvab; ajapikku kasvab ka CBH geenide BD; 24 mo kõdus domi nade kaupa, ECM max suvel, min kevadel ent mitteoluliselt. Paljudel ECM liikidel olulised erinevused

ia, *Cenoc*, *Xerocomus*, *Phylloporus* ECM süntees ilma kirjeldusteta! Ei mood *Strobilomyces* ja *Lycoperdon*

**Maryland: Fagus, Quercus** ECM, *Ilex*, *Liriodendron*, *Acer rub*, *Ulmus* am AM; kõik illustr

**Populus delto: Populus deltoides** on AM *Mississ deltas*, vähemviljakal mood AM ja ECM; P. *Heterophylla* oli NM; P. *Fremontii*, P. *Grandidentata*, P. *Tremuloides* mood v; *Mycorrhizae*. USDA Forest Service: Washington USA. pp. 187-195.

**Piceirhiza vs Hymenoscyphus** **perekonnaspetsiifilise** **Piceirhiza** vs *Hymenoscyphus* *carbonaria* (*Ascomycota*) is a biotrophic root associate with Norway spruce (*Picea abies*) in nature. *Mol. Ecol.* 7: 609-616.

finitities of symbiotic root-associated ascomycetes of the Helotiales in burnt and metal polluted habitats. *New Phytol.* 155: 131-148. **enamus juure** isolaate ja *Piceirhiza* b

ew Phytol. 164: 7-10.

mycetes. PhD Thesis. University of Oslo.

cure for use in forest ecosystems. Environ. Exp. Bot. 21: 267-268.

ation management system for DNA barcoding workflows. Integr. Biol. In press.

süsteem DNA eraldus

ersity, dominance and community structure in the rhizosphere of clonal *Picea mariana* plants throughout nursery production chronosequences. Microb. Ecol. 54: 672-684.

atellite markers from an ectomycorrhizal fungus, *Laccaria amethystina*, by a dual SCAR mikrosatelliidid *Laccaria amethystina*. AFLP põhjal + kloneerides, 3 praimeriga

soil communit mullaorganismide suuruse järgi kaotamine tugevalt vähendas ökosüsteemide multifunktsionaalsust. Osaliselt toimus mõju läbi taimede

y effects of pla AM-seente realiseerunud mitmekesisus suurendab prod. Statistiliselt eemaldati erinevate liikide efekt eraldi. AM-seente realiseerit

ycorrhizal, arbuscular mycorrhizal, and dark septate fungi in seedlings of four members of the Pinaceae. Mycorrhiza 18: 103-110.

Variogram analysis of the spatial genetic structure of continuous populations using multilocus microsatellite data. Genetics 169: 1739-1752.

variogramide kasu

ldwide taxa *Phellinus* s.l. And *Inonotus* s.l., and phylogenetic relationships of allied genera. Mycologia 94: 998-1016.

Hymenochaetales: Phellinaceae ja Ir

Tom-Thel 2 spp, PsTom 2 spp, *Lact rufus*, *Lacc prox*, jpt

nõjutas fenoolide lisamine, tugev mõju männiokaste lisamisel. Fenoolide lisamine 13C PLFA

puisniidul

Agaricales sp, *Mortierella* sp, *Metharhizum* sp, *Fusarium* sp. Teiste hulgas ka Ec ITS1-ITS4 mullast

ponen A. 2011. Diverse Helotiales associated with the roots of three species of Arctic Ericaceae provide no evidence for host specificity. New Phytol. 191: 515-527.

ungus assemblages on oak seedlings in the southeastern Appalachian Mountains. Mycorrhiza 18: 123-132.

aria laccata, Cantharellaceae1; sugukonniti Russulaceae, Thelephoraceae, Cortir ITS

ITS1+5.8S+ITS2 identsuskriteerium 97%

of ectomycorrh **ECM seeni inhibeerivad erikoidid, v.a Cenococcum**

tatus of *Tremellodendron* (Sebacinaceae). In: Cripps CL (ed.). Fungi in Forest E ITS4NA praimer kandseente jaoks

t need ühel peremehel singletonid; ensüümide aktiivsus Acid phosphatase kõrgem lepa seentel kui PsTsuga seentel. Haruldastel liikidel samasugun

1 in subalpine clearcuts affects ectomycorrhizal root tip community structure within fifteen years of harvest. Appl. Soil Ecol. 60: 5-15.

and soil N fertility effects on growth, mycorrhizal colonization, and xylem water potential of juvenile ponderosa pine in a field soil. Plant Soil 195: 25-36.

ycorrhizal fungi in intensively fertilized Norway spruce forests. For. Ecol. Manage. 262: 999-1007.

natural abundance EMH kuusikus vs kuuse-tamme segametsas. Kuusikus sügavusjaotus ühtlasem kui tammikus, üldse kuni 70 cm süg olulisel määral. 13C müteelisel sügavuti s

composition of ectomycorrhizal rhizomorphs grown in contact with different minerals in forest soil. FEMS Microbiol. Ecol. 39: 147-156.

mposition of ectomycorrhizal mycelia identi éed by PCR ^RFLP analysis and grown in contact with apatite or wood ash in forest soil. FEMS Microbiol. Ecol. 44: 57-65.

und seasonal growth of external mycelium of ectomycorrhizal fungi in the field. N PLFA: ergosterool, rasvhapped, söelkotist väljas-söelkotis, 13C eristamiseks saprotroofides

nd mineral concentration in host tissue on ectomycorrhizal development on *Pinus sylvestris* L. in relation to nutrient supply. New Phytol. 127: 521-528.

ration and mycorrhizal development of *Pinus sylvestris* L. seedlings. New Phytol. 119: 405-411.

l by different ectomycorrhizal fungi. Plant Soil 218: 249-256.

ering of biotite induced by pine seedlings colonised by ectomycorrhizal fungi from two different soils. Plant Soil 222: 215-229.

etes, Sordariomycetes domin. Kandseentest domin Agaricales, Aphyllophorales, Boletales. Sesoonsed muutused esinesid klassi-ja madalamatel takson-tasemetel. Mullasti

; the in situ activity of soil extracellular enzymes. Soil Biol. Biochem. 40: 2098-2106.

mõõtmis

est by trampling: Effects on mycorrhizal roots of seedlings and mature trees of *Fagus sylvatica*. Plant Soil 243: 143-154.

. J. Bot. 51: 331-353.

and plants. Mymaismaatimede MR staatus: palju valeandmeid, andmed puudu. EcM ja NM taimed ning mükoheterotek tek palju kordi maismaatimede MR staatus: palju v

ycorrhizal genes in the common ancestor of land plants suggests a key role of mycorrhizas in the colonization of land by plants. New P mükoriisa tekkeks vajalikud ge

rrhizal fungi: *Phialophora finlandia*, *Chloridium paucisporum* and *Phialocephala fortinii*. Mycologia 77: 951-958. Phialophora finlandia (Cadoph

of PCR co-amplification of 16S rRNA genes from different bacterial species. Mic keskkonnaproovide sekveneer keskkonnaproovide sekveneerimine 16S rDNA ja kimääric

1 ferruginea

lianotungensis of different ages in a northern China temperate forest. Mycorrhiza. In press.

f oligonucleotide-microarray method for the detection of human intestinal bacteria in fecal samples. FEMS Micr 16S rDNA r 16S rDNA probed 4( Ei mingit normaliseerim

from the roots of aspen in central Alberta: identification, morphology, and interactions with the host, in vitro. Can. J. Bot. 85: 1241-1226.

vidence from three genomes. Mol. Biol. Evol. 17: 773-781. männiliste teke juura-ajastu lõpus. Fülogenees: basaalne *Cedrus* ((*Pin männiliste teke juura-ajastu lõpus. F*

es. Scand. J. For. Res. 16: 199-220.

RFLP, SCCE, AFLP jt: ülevaade puude kohta; sekve eritaimedel ja eriDNA pii allosüüma

ments. Can. J. Bot. 82: 1063-1073.

olution of helotialean fungi (Leotiomycetes, Pezizomycotina): a nuclear rDNA phylogeny. Mol. Phyl. Evol. 41: 295-312.

Helotiales: LSU + SSU +5.8rDNA.

phylogenetic classification of the Leotiomycetes based on rDNA data. Mycologia 98: 1066-1076.

Leotiomycetes fülogenees

rphology in leaf endophytes. PLoS One 4: e4246.

Helotiales: VKD on redutseerun

nsend JP. 2011. Tasting soil fungal diversity with earth tongues: phylogenetic test of SATé alignments for environmental ITS data. PL Geoglossales INSDst ITS. SAT

Austraalia Asi Austraalia Asteraceae subF Inuleae on u pooled ECM, sh kõik on l-a rohttaimed; puud ja puhmad on AM, teised subF on AM. Sünteestitud mullal mingi tun

ds. New Phytol. 66: 631-641.

amorfii iseloomustus, kasvavad eukalüptidega, peale põlengut mood viljakehi. Mantel õhuke, HN fragmentaalne. Sam Ruhlandiella. Pu Muciturbo: hüpogeiliste viljakehade;

. New Phytol. 70: 41-46.

ECM puud austraalias: Myrtaceae, Casuarinaceae, Rhamnaceae, mimosaceae, Fabaceae, Euphorbiaceae, Sterculiaceae, Thymeliaceae, Apiaceae, Rubiaceae, Goodeniaceae

87: 371-381.

): 267-272.

: and close association with *Melaleuca uncinata* (Myrtaceae) in western Australia. New Phytol. 99: 273-280.

Lobelioideae moned 1a Austraalia liigid mood EcM (*Lobelia heterophylla*), teised mood endoMR EcM seentega, kolmandad AM. EcM on monedele liikidele hadavajalik,

Phytol. 110: 227-231.

eukalüptimetsas 1-3 a peale põlengut: pirofiilsetel kottseentel oma suksessioon. 1a: *Anthracobia melaloma*, *A. Maurilabra* (mitteMR), *Peziza tenacella* (mitteMR), *Pulvin*

ole, HN norm

Inuleae (AUS Inuleae (AUS Asteraceae) mood kas EcM ja VAM või VAM, sõltuvalt fülogen. Positsioonist

Inuleae (AUS Asteraceae) mood ka

andiella, Muciturbo -Viljakehade mood põhjal taassünteisil puhaskultuurist, nähti ka identifitseerimata anamorfte), kandseentest *Laccaria*

*Thanatephorus gardneri* mood ECM *Melaleuca* ja eukalüptidel

ol. 72: 387-392.

taar, bakterite molekulaarne liigidefinitioon (97% SSU = 70% DNA-DNA reass kineetika); 16S rDNA põhjal bakterite diversiteet: lühiülevaade, Curtis2002 kommentaar decomposers, erinevate troofiliste rühmade sõltuvus taimede funktsionaalsest mitmekesisusest: väike; tugev vaid taimkatte puudumise korral

2004. Ecologic maapealsed ja maaalused seosed: ülevaade  
ntal evidence which does not support the view that enhanced species richness improves ecosystem function. Oikos 79: 247-258.  
46: 1052-1053.

diversity on d kōdulagunemine: kōdu segu efekt on aditiivne. Mullaloomadele mõjub mitte BD, vaid taimeliikide identiteet!

trophic level s taimede liigirikkus per se ja funktsionaalsed grupid ei mõjuta niivõrd mikroobide BD kui seda teevad individuaalsed taimeliigid; mõ blocked 1-way ANOVA  
a on ecosystem properties. Science 277: 1296-1299. saare suurusest sõltuvad taimekooslused: kovariatsioon: suured saared põlevad sagedamini, sest on suurem

iversity-ecosy ülddiverseediuringud: probleemid, ämbrid, korrektne katse püstitus  
9: 870-886. taimede liigirikkuse ja muude tunnuste/funktsioonide stimuleerivad mõjud mullaelustiku BD-le otseselt ja kaudselt  
idase from the basidiomycete *Phanerochaete chrysosporium*. J. Biol. Chem. 267:23688-23695. MnP: met

ology alter soil seente-bakterite suhe sõltub enim mulla C:N suhtest

water from Pinus **hydrauliline lift**: maha saetud puukändudele joodetud vesi ja deuteerium jõuavad 3 nädalaga läbi mükoriisaseente ka noortele puudele  
water from *Pinus ponderosa* trees to seedlings: evidence for an ectomycorrhizal pathway. New Phytol. 178: 382-394.

rraclough TG, Pauw A. 2011. The effects of above- and belowground mutualisms on orchid speciation and coexistence. Am. Nat. 177: E54-E68.

lination and mycorrhizal biology of orchids. J. Exp. Bot. 59: 1085-1096.

a: eri diptero-k perek-del dominadid kattuvad: Huvitavatest *Sarcodon thwaitsei*, *Laccaria vinaceoavellanea*  
a: eri diptero-k perek-del dominadid kattuvad: Huvitavatest *Leccinum* sp  
Bot. 14: 407-416. Boletales poroides perek Austraalias ja seosed Aasia ning Lõuna-pooleraga: *Boletus*, *Boletellus*, *Tylopilus*  
south-east Asia. Mycol. Res. 105: 1440-1448. Boletales: er perek *Boletus* SE aasias v liigirikas. Käib läbi kõigi troop Boletales: er perek *Boletus* SE aasia  
pecies and fungi: interactions with fungal, plant, and animal communities. In: Dighton J, White JF, Oudemans P, eds. The Fungal Community. Its Organization and Role in  
Sclerodermales: *Astraeus hygrometricus* on arv komplekslik nagu P Sclerodermales: *Astraeus hygrome*  
prokariotoidide BD indek

sible solution. Appl. Environ. Microbiol. 62: 4299-4301.

f Community Phylogenetic Structure and Trait Evolution, Version 4.0.1. Available from URL: <http://www.phylodiversity.net/phylocom/>.

unity ecology. süstemaatika abil liikide grupeerimine, tegemaks analüüse: ülevaade

id the phylogenetic structure of tropical forest tree communities. troopika puukoosluste fülogeneetilise võrdlemise idee

rtality, size str evol ökol: Borneol seemikute ellujäämus sõltub nii sama liiki seemikute kui sõsarliikide tihedusest. Mida suurem on sõsarliikide fülogen mitmekesisus seemi  
n example for evolutsiooniline ökoloogia: sarnasemad liigid sar evolutsiooniline ökoloogia: sarnasemad liigid sarnasemates kasvukohtades vrd juhuslikuga. Evol superpuu  
orrhiza-dominated forests: testing the role of inoculum potential of arbuscular mycorrhizal fungi. Oecologia 143:148-156.

ice Data: A Case Study of Foraminifera? PLoS One 8:e56739. mock community: Foraminifera - saab anda kvantitatiivse hinnangu enamiku  
mycorrhizas of an American *Laccaria bicolor* strain inoculated in European Dou SCAR markerid *Laccaria bicolor* N238le. RAPD unikaalsete bändide põhjal. N238 sageli  
ve and experimental approaches. Trends Ecol. Evol. In press.

us fungus *Tuber aestivum* syn. *T. uncinatum* on the island of Gotland. Tuber aestivum | RAPD Tuber aestivum  
he synonyms *Tuber aestivum* and *Tuber uncinatum*. Environ. M Tuber aestivum Roots: täpset sisserändepäritolu ei suudetud näidata. Tuber aestivum = *Tuber uncinatum* l  
skr. 95: 205-211.

*Quercus robur* and *Corylus avellana* field trials on the island of Gotland. Scand. J. For. Res. 24: 37-53.

ör the same fu Stictis ja *Conotrema*: lihenis ja mittelihhenis saproobne kottseen on jaotunud samade seeneliikide vahel Stictis ja *Conotrema*: lihenis ja mitt  
iza 21: 105-115.

harina sp

rsion of host u herbivoorsete putukakooslused on sarnasemad fülogeneet lähedasematel peremeestaimedel. Spetsialiseeritus erines suuresti putukarühmiti  
ved hjælp av taxon-selektive nrDNA baserte *Helvella* -primere. Cand. Sci. Thesis *Helvella*-spets praimerid  
ree seedlings. Phytopathology 11: 141-144.

on rates of bird Liigiteke ja väljasuremine on suurem temp-boreaalsetel aladel ,kus kliimamuutused on tuge  
l related groups-hypothesis derived from nuclear ribosomal DNA sequences. My heterobasidiomycota: ITS, LSU Heterobasidiomycota: Tremellales, /  
hitherto overlooked cosm of heterobasidiomycetes with a broad mycorrhizal potential. Mycol. Res. 108: 1003-1010. Sebaciales: taksonoomia, süstema  
er R, Redecker D. 2011. Sebaciales everywhere: previously overlooked ubiquitous fungal endophytes. PLoS One 6: e16793. Sebaciales: palju juure-endofü  
by the corf-forming basidiomycete *Phanerochaete velutina*: the significance of local nutrient supply. New Phytol. 138: 607-617.  
ily Sebaciales. Mycologia 74: 324-331. Tremelloscypha gen noc. 2 liiki  
Mycologia 67: 147-156. Efibulobasidium: VK sültjad n;  
dules of geographically isolated Arizona alder trees in Central Arizona (United States). Appl. Environ. Microbiol. 75: 6913-6918.

si liike vaid 1 *Rhizopogon*

is between *Tuber melanosporum* mycelia and transformed roots of *Cistus incanus*. Plant Cell Reports 20: 369-373.  
. J. Bot. 60: 103-110.

pe ratio analysis. Rapid Communications in Mass Spectrometry 15: 501-519.

pe transition: stepis vs metsas vs kkt (eri mullaniiskus, mullatemp, PAR, kōdu, pH, orgaanika sisaldus, häiring; mulla N, P); DCA DCA

gy and evolution. Ecology 87: S163-S165.

mbiosis with Casuarinal N lisamine ja taimekasvukiirus määrasid d15N

ill T. 2002. Interactions between decomposing wood, mycorrhiza, and terrestrial orchid seeds and protocorms. In: Kindlmann P, Willems JH, Whigham DF, eds. Trends an  
hogens. Can. J. Bot. 82: 1198-1227.

opulations of hyperthermophilic archaea. Science 301: 976-978.

01. 13C incorporation into DNA as a means of identifying the active components 13C rDNA bakterid, rikastatud 13CO2  
nment and clustering of phylogenetic markers - implications for microbial diversity studies. BMC Bioinform. 11: 152. iteratiivne klasterdar  
logeny of the Zygomycota based on nuclear ribosomal sequence data. Mycologia 98: 872-874. Zygomycota: 3 evol-haru. End  
ray: *Amanita*, *Austropax*, *Boletus*, *Cantharellus*, *Clavulina*, *Coltricia*, *Cortinarius* (domin), *Descolea*, *Entoloma*, *Hebeloma*, *Inocybe*, *Laccaria*, *Tom  
iving. Am. Nat. 175: 145-146. andmete kättesaadav*

s: Ecol. Evol. 2 andmete säilitamine arhiivides on eelistatum kui artikli kodulehtedel, kodulehel või andmete säilitamine arhiivides on eelistatum kui a  
c

is of the speci meta-analüüsi vaja kaasata ka uuritud skaala, proovide suurus. Kriitika Pärtel 2007 ja Laanisto 2008 aadressil

ecies structure **troopikametsades üldiselt pole üksikliike**, kel väga suur mõju koosluse struktuuri üle. Panamas pigem repellendid ja Sri Lankal mõned N. 2012. Testi **kooseksisteerimine: suurema liigirikkuse korral puudel üksteise vältimise muster väheneb (proportsionaalselt, mitte abs!) ja assotsiatsiooni barcoding gap: artefakt väheste proovide tõttu**

wood-wide web. Curr. Opin. Plant Biol. 5: 1-7.

HV et al. 2011 **nisi konservatism: ülevaade testimisest, LK-st, toiduahelast, invasiivsetest, kliimamuutusest; prioriteedid nisi konservatism: ülevaade testis. Trends Ecology and Evolution 26: 11-18.** **evolutsioonilise ökoloogia arendus, filogeneetilis: evolutsioonilise ökoloogia arendus, filogeneetilise nissi säilitamine. Taksoni levikut mõj algne ökoniss, algd conservation nishi konserveerumine: sõltub skaalast ja nishi konserveerumine: sõltub skaalast ja tuvastamisprobleemid; olemus**

**ui väetada: Cortinarius kaob, niisutades tuleb Cortinarius just juurde** atting the family tree. Proc. R. Soc. Lond. B. 268: 2211-2220. **taimedel: erinevate geenisekventsides**

it affects communities of culturable root-endophytic fungi in temperate grasslands. Soil Biol. Biochem. 35: 1143-1154. **DCA; TWINSpan, Bri** idega; Phialophora finlandia sarnane ektendoMR klamüdosporiididega (??? Chloridium paucisporum???)

eaajuurtesse, väga ohuke mantel, DS hüüfid, harv kaheksharunemine

, P fortinii, Phialophora finlandia (ECM või ektendoMR), Chloridium paucisporum??? (ECM või ektendoMR), Cenoc. Mitmed peremeestaimed: mänd, kuusk, kask

lylo E (ed.). Mycorrhizae. USDA Forest Service: Washington USA. pp. 54-68.

aylo E (ed.). Mycorrhizae. USDA Forest Service: Washington USA. pp. 183-185.

ypthal necromyces ECM seente liigirikkus vs hüüfide lagunemine ja CO2 eritamine: BD pos efekt

iversity regulat **Paxillus obscurusporus isolaatidel v erinev** mõju taime kasvule ja mullahingamisele. Suurem genotüüpide arv stimuleerib kasvu

ol. Biogeogr. Lett. 7: 137-140. **arv. Et mükoriisad mõju taimede migratsiooni pärast jääaega. Puude levikukiirused 200-2000**

:407-410. **ektomükoriisa püsimine probleemid: vastastikuse altruismi hüpoteesi -likatit ümber, positiivse tagasisidemega koosolemine (Perry et al 92 hüpot); grupivalik,**

anisms. A comment on Fitter et al. 1998. Funct. Ecol. 13: 435-436.

ology? Oikos **sümbioosi sh mükoriisa evol püsümiseks kõlbavad lisaks vertikaalsele ülekandele ka horis ülekande erijuhud: kui peremees saab valida paljude sümbiontide l**

**AM ja ECM teke. ECM tekkinud iseseisvalt mitu AM ja ECM teke. ECM tekkinud iseseisvalt mitmetes rühmades ja tagasi pöördumine saprootfideks, mit**

ree-living microorganisms? J. Biogeogr. 28: 285-291. **amööbidel suurusega alla 100 µm on enamasti kosmopoliitne levik**

f Poa pratensis. Can. J. Bot. 65: 150-153.

ja kuusel bakterid, hiljem hakkavad bakterid enam domin. Mikroobide biomass suureneb ajas.

ot replace morphology for identification and classification. Cladistics 20: 47-55. **DNA barcoding ei saa DNA barcoding ei saa asendada mor**

ifty thousand years of arctic vegetation and megafaunal diet. Nature 506: 47-51.

ular investigation of sterile root-associated fungi from Epacris microphylla R. Br. (Ericaceae) and other epacrids at alpine, subalpine and coastal heathland sites. Australas. **of Coriolus versicolor. New Phytol. 89: 307-319.**

Antarctica. Mycol. Res. 98: 34-36.

**North New Mexico, S Wyoming: Purshia tridentata, Cercocarpus montanus mood EcM, AM ja Frankiagi nooduleid**

Annu. Rev. Ecol. Evol. Syst. 34: 273-309. **latituudi gradient: ülevaade taksonitest ja hüpoteesidest. Geometric constraint on tähtis**

science 311: 5. **troopikas puude diversiteeti hoiab üleval lokaalselt haruldaste väiksem sümum**

ar's microendemic biota. Science 312: 1063-1065. **Madagaskari jaot biogeo mikroregionideks. Imetajatel on see sõltuv veelehmalaadest. Kuivadel ja jahedel**

ic pairings of Echinodontium tinctorium. Can. J. Bot. 69: 2716 - 2723.

al host associations in the Sclerodermatineae (Boletales, Basidi **Sclerodermatineae - arv /scler-pisool linidz tek 66 (50-90 err) MAT Aasias. Arv Aasias tek k:**

ology on diversification rates in three independent clades of Fungi estimated during binary state speciation and extinction analysis. Evo **gasteroidsete ja mitteG volvkiri**

s pundis, mood EcM **Calostoma cinnabarinum on pi:**

Phialocephala fortinii, P. Sphaeroides, vähem Leptodontidium orchidicola **Phialocephala sphaeroides liigikirjel**

ci TA, Andersen GL. 2002. High-density microarray of small-subunit ribosomal DNA probes. Appl. Environ. Microbiol. 68: **16S rDNA: >30000 probe, väga tihedasti, 20**

ential microbial colonisation of ferromagnesian minerals affect mineral weathering in soil? Naturwissenschaften 95: 851-858.

essment of infrafamilial groups. Am. J. Bot. 88: 2013-2025. **Myrtaceae: EcM perek väh 4 eri har**

). **juurkonkurents preerias karmim kui metsas haavale, ent mitte Boutelouale. Haab ECM-puu**

ific identification of 18 pathogenic microorganisms using microarray technology. Mol. Cell. Probes 16: 119-127. **18 eri patogeeni (viirused, bakterid jt) spetsiif**

2010. Photosynthetic carbon isotope discrimination and its relationships to the carbon isotope signals of stem, soil and ecosystem respiration. New Phytol. 188: 576-589.

otic forest fungi, especially in the tropics and the Southern Hemisphere. Bioscience 51: 134-140.

(Picea abies) roots affects the pathway of anaplerotic CO2 fixation. Physiol. Plant. 96: 699-705. **PEP karb**

NA sequences. PhD Thesis. University of Umea, Sweden. **kottseente üldfilogenees 18S: vilets,**

S from New Zealand. Trends Ecol. Evol. 17: 514-520. **Uus-Meremaa biogeo: paljud NZL taimeliigid on hiljuti sinna levinud, radieerunud ja edasi levinud. Arv ei**

ox genes reveal that gnetophytes are more closely related to conifers than to flowering plants. Proc. Natl. Acad. Sci. 96: 7342-7347. **Gnetales vs õistaimed: MADS home**

ceae. New Ph **Lycopodiaceae sporofüüdid ja gametofüüdid mood AM. Gametofüüdid on mükoheterotroofid ja seonduvad vaid nende Glomuste rühmadega, mis ka eelnev:**

- Mise au point d'un outil moléculaire adapté à l'étude de l'écologie du genre *Morchella* en milieu forestier. PhD thesis, Laboratoire de Biologie Forestière, Nancy, France

2003. *Compat Alnus rubra* on tähtis komponent Alaska ökosüsteemis nii tootlikkuse kui bioloogilise mitmekesisuse koha pealt

kuival pinnal (Cylindrocarpon, Trichoderma), nii kival kui märjal juurtes (Bjerkaa **ITS1F-ITS4 + spets** praimerid pilliroole ning Trichoderma

lomustele kui ka spetspraimerid eristunud rühmadele. Leiti 35 liiki, sügiseti rohk **AM mol BD pilliroo** juurtes: kas praimereid nii tava-Glomustele kui ka spetspraimerid eri

. Svenning J-C **liikide kooseksisteerimise, sh konkurents** ja fasilitatsiooni mõõtmise viisid ja interpreteerimine; ülevaade **liikide kooseksisteer**

re and life span **taime lehtede ja juurte ökomorf: okaspuudel juured jämedamad pms seenmantli võrra! Välja toodud seenmantli paksused liikide kaup:**

minosae).. **liblikõielised: väh 2 EcM klaadi: ak**

BB, Bruneau A. (eds.) Advances in legume systematics. **liblikõielised: radiatsioon kesk-ootse**

plant invasion **mullamikroobid hõlbust invas taimede invasiooni mullamikroobid** hõlbust invas taimede invasiooni. Paljud invas taimed muudavad mullamikroobide kooslus

ading its range in the United States. Mycologia 104: 22-33.

the range expansions and host shifts of a symbiotic fungus. ISME J. 6 :745-755.

leitud teede ääres, ent mõnes kohas ka sügaval metsas **Amanita phalloides invad N-Am: VK enamasti leitud teede ääres, ent mõnes kohas ka sügav**

tiolata (garlic **invasiivsed taimed Alliaria petiolata reduts**. Männi EcM kolonis ja ecM biomassi allelopaatia teel.

thway marks the single origin of an ectomycorrhizal symbiosis. PLoS ONE 7: e39597. Amanita: saproobsed. EcM armory of Tylopilus subg. *Roseoscabra* in Australia, elucidated by comparison with Asian and American species. Aust. Syst. Bot. 6: 187-200. Tylopilus subgen *Roseoscabra*: uued morfoloogilised vormid. Aastate lõikes muster ei kordu.

*Alnus alnobetula* idandid: obs vaid AM ja juurenooduleid atmosfääris. Phil. Trans. R. Soc. B 365: 3645-3653. atmosfääri mikroobid: dormantsed aga v paljud ka aktiivsed; arvukus väheneb vertikaalselt; *Gnetum* -v vana rühm, mis säilis L-Am ja viimase 47-13 MA jooksul *Gnetum* -v vana rühm, mis säilis L-Am

for microbes: the unsampled and the unseen. Ecol. Lett. 9: 800-806. mikroobide liigirikkus-ala suurus väikesed z-väärtused tulenevad eelkõige tuvastamata haruldastest tüüpi üleminekutest. J. Biogeogr. 30: 105-112. Malaka poolsaar, Kra maakitsus; merede regressioonid ja transgressioonid ning selle mõju elusloodusele ja lignicolous fungi. Mycologia 89: 199-219.

uazu NP: EcM puid ei mainita. Leituid vaid *Thelephora* 1 sp, *Coltricia* 1-2 spp; saproobidest sh *Phlebobolus tropicus*, *Geastrum* 3 spp, *Sphaerobolus* 1 sp. Functional characterization of fungi from the *Sebacina vermifera* complex from common and rare orchids in the genus *Caladenia*. Mycorrhiza, in press.

of evolution in tropical climates. Proc. Natl. Acad. Sci. 107: 1111-1116. taime molekulaarne evolutsioon troopikas keskm 2x kiiremini kui temperaatsetes piirkondades. taime molekulaarne evolutsioon eelkõige El Nino? Pacific biogeography and evolution of *Metrosideros* tek arv Uus-Meremaal, kust levis suht hiljuti alles välja arv kliimamuutuste ja sellest lähtuvalt ja ka ca 33% kloonidest)

rhizal fungi in a primary successional volcanic desert on the southeast slope of Mount MAM nuLSU t-RFLP, sekvantsid. Mol. Ecol. Notes 2: 413-415. RAPD, SCAR markerid kasele ja kask. Interactions between extraradical mycelia of ectomycorrhizal *Pisolithus* isolates. New Phytol. 194: 1070-1078.

between *Pinus densiflora* seedlings linked by ectomycorrhizal mycelia? New Phytol. 149: 137-146.

tosynthate from ectomycorrhizal *Pinus densiflora* seedlings to extramatricial mycelia. Mycorrhiza online.

lations in primary successional volcanic deserts on Mount Fuji. *Cenococcium*: levib primaarse suksessiooni aladele vegetatiivselt. Lähedastel aladel mõned identsed genotüübid. Uptake and transport of <sup>15</sup>N-labeled compounds by *Pinus tabulaeformis* seedlings under water-stressed conditions. Biol. Fert. Soils 28: 136-138.

porocaps and a hyphal mantle. Mycotaxon. 179-188.

*Peridiospora* gen nov. Zygomycota

hance the growth of the endangered orchid *Cymbidium goeringii*. Botany 88: 20-29.

valuation of functional gene arrays for detection of selected genes in the environment. Appl. Environ. Microbiol. 68: 1111-1116. kogu geeni : kogu geeni array: amoA, pmoA, nirS, nirK, 16S rRNA. sarnaseimad piirkonnad 'Simpsoni indeksi jrk'. Amanita -Aasia-Eur; NE Am-NW Am; Lactarius -Eur-Aasia; *Suillus* biogeograafia: Aasia vs Ameerikas -populatsioonid on selgelt eristunud moningatel liikidel

N nutrition of ectomycorrhizal *Pinus resinosa*. Soil Biol. Biochem. 37: 965-975.

robies and ectomycorrhizal fungi using a protein-tannin complex as an N source by red pine (*Pinus resinosa*). New Phytol. 159: 131-139.

kooslus muutub, korrel taimekooslusega va EcMF

g common airborne fungi, and development of specific oligonucleotide probes for the detection of fungal isolates. Appl. Environ. Microbiol. 68: 1111-1116. slot blotid >30 eostega levivale seenetele, 18-20 puudel Etiopias AM

genous conifer species in the dry Afromontane forests of Ethiopia are associated with distinct arbuscular mycorrhizal fungal communities. Can. J. Bot. 84: 1617-1627.

of arbuscular mycorrhizal fungi in *Prunus africana*, an endangered medicinal tree species in dry Afromontane forests. *Prunus africana* -praimerite mittesobivus AM seent. X2 test 2 koosluse eristamine. 2RE + sekv

*Cenococcium*; rabas mänd ja männil *Suillus tomentosus*; 3. *Russula* sp. Tuvastatud *Suillus* ka tsuuga ja kuuse juurel

note a nitrogen-fixing *Rhododendron* varis lagun aeglasemalt kui lehtpuudel ja sisald rohkem tanniine. ErM juured said *Rhododendron* pinnaselt paremini kätte. their multicopper oxidases from a temperate forest shrub. Ecol. Evol. 2: 65-79.

acts: Historical biogeographical implications for angiosperms in 10 taimeperekk boreotroopilises vöötmes: enamuse levikutsentent SE-A. Proge DIVA kasutamine traimede bioloogilises jaultheria shallon on forest clearcuts. Can. J. Bot. 74: 337-346.

ric transfer of ribosomal genes between two fungi. BMC Evol. Biol. 8: 87.

J. Ecol. 87: 98 varise efekt taimekooslustele: üldjuhul negatiivne seal kus paks kōdukiht; pikemas perspektiivis varustab toitainetega; positiivne rohukogus. nantation among natural populations of the ectomycorrhizal mushroom *Tricholoma matsutake* from southwestern China. Mol. Ecol. 17: 1238-1247.

tiis vähim, mullas rohkem; kooslused muutuvad haigetel taimedel

on, nitrogen and phosphorus in terrestrial ecosystems. Glob. Ecol. Evol. 2: 65-79. Mullas ja mikroobne C, N, P suurenevad pooluste poole; maailma keskmine mulla C/N=17 ja N/P=14. pärm levinud vaid põhjapoolkeral kuni Kesk-Mehhikoni, tsentriga Ida-Aasias. Tek hiliskriidid Kagu-Aasias

*tanthera minor*, an orchid associated with ectomycorrhiza-forming *Ceratobasidiaceae* fungi. New Phytol. 193: 178-187.

ngi isolated from nonphotosynthetic orchid *Chamaegastrodia sikokiana*. Mycorrhiza 18: 97-101.

(Orchidaceae) in tripartite symbioses with *Thelephoraceae* fungi and *Quercus serrata* (Fagaceae) in pot culture condition. J. Plant Res. In press.

vrđ ECM BD

Kolmogorov

uda M. 2008. *Monotropastrum humile* var. *humile* is associated with diverse ectomycorrhizal Russulaceae fungi in Japanese forest. Ecol. Res. 23: 983-993.

ectomycorrhizal fungi associated with *Pinus densiflora* by in vitro mycorrhizal synthesis. I. Primordium and basidiocarp formation in open-pot culture. Mycorrhiza 11: 59-66.

3 RE, tõestamine

ler: effects of Frankia and *Alpova diplophloeus* on the growth, nitrogen fixation and mineral acquisition of *Alnus tenuifolia*. Plant Soil 254: 179-186.

saprotrophic and ectomycorrhizal fungi producing sporophores on urea-untreated forest floor. Mycol. Res. 103: 811-816.

olia on the growth, nutrition and ectomycorrhizal symbiont community of black spruce. For. Ecol. Manage. 105: 197-207.

Effects of Forest Use on Aphyllorhaceous Fungal Community Structure in Sarawak, Malaysia. Biotropica 40: 354-362.

*ephalanthera falcata* (Orchidaceae) into natural habitat and investigation of colonized mycorrhizal fungi. Ecol. Res. 23: 329-337.

*ephalanthera falcata* (Orchidaceae) into natural habitat and investigation of colonized mycorrhizal fungi. Ecol. Res. 23: 329-337.

orthern Japan. lepa muld on happeline, ent okaspuudega võrreldes toitaineterikas; lepa varis laguneb kiiresti vrđ teiste puudega, on toitaineterikas (eriti kask, *Tricharina mikolae*. Mycologia 76: 675-684. *Tricharina mikolae* (nüüd *Wilcoxina*)

he distribution of arbuscular mycorrhizal fungi: evidence from ITS rDNA sequence metadata. BMC Evol. Biol. 12: 50.

hou J. 2014. The microbial gene diversity along an elevational gradient of the Tibetan grassland. ISME J. 8: 430-440. **geenide**

ngi in two mangroves in South China. Plant Soil 331: 181-191.

Rev. Genet. 3: 579-588.

**cdNA** microarray di: **cdNA** microarray disair

he genus *Anamika* (eugarics, hebelomatoid clade) based on morphology and ribosomal DNA sequences. Mycol. Res. 109: 1259-1267. **Anamika** tuued liigid JPN „S-Hi

questrate genus *Rhodactina* (Basidiomycota, Boletales) in northern Thailand. Mycotaxon 96: 133-140. **Rhodactina** gen nov. Hypog Bc

**lktseksioon**

suured erinevused, ent BD sama. EcM BD nõgudes kõrgem. Seentekooslusel ja taimede kooslusel v tugev Procrustes korrelatsioon

2010. Use of ITS2 region as the universal DNA barcode for plants and animals. **ITS2** eristab keskmiselt 92% loomaliikidest ja 75% taimeliikidest. 0.3% taim

); Kew Bull. 50: 359-365

les (Zygomycotina) Kew Bull. 50: 349-357.

**na kirjeldus**

rd Cortinarius, Atheliales, girdling: Helotiales, Serendipitaceae, Ganodermataceae. Bakteritel muutused väiksemad: vähenesid alphaproteob ja Acic

sed on two chloroplast DNA regions: ndhF and trnL Intron-intergenic spacer. Syst. Bot. 25: 479-494. **Kobresia** on pisike rühm perek Care

as O, Piceno YM, Andersen GL, Kowalchuk GA. 2009. Environmental microarray analyses of Antarctic soil microbial comm **Phylochip** vs Geochip: fülog BD ja funi

im information MIMARKS standardid ökoloogilistele uuringutele ja proovidele

re of ectomycorrhizal fungi in a dipterocarp forest in Thailand. International Symposium on Microbial Ecology. Asia 2007, 15-17 September 2007. Ehime Univ., Matsuyar

oryloidea (Betulaceae). Int. J. Plant Sci. 163: 641-650. **Corylus(Ostryopsis(Ostrya+Carpinus segi))**. Aasia on refuugium **Corylus(Ostryopsis(Ostrya+Carpinu**

frica) with basidia forming internal hyphae. Mycol. Progr. 6: 239-247. **Tomentella** furcata sp nov

ta, (Thelephorales): *Tomentella radiosa*, *Tomentella cinereoumbriana* and *Tomentella punicea*. Nova Hedw. 85: 521-539. **Tomentella** tüübikirjeldused: T. Pun

igi: 1. *Tomentella capitata* and *Tomentella brunneocystidia*, two new species from Benin (West Africa) with capitate cystidia. Mycol. Progr. 6: 7-18.

*opa uniflora*: morphological and molecular assessment of mycorrhizae retrieved from sites in the sub-boreal spruce biogeoclimatic zone in central British Columbia.

: 30-31.

ewton WE (eds.). Genomes and Genomics of Nitrogen-Fixing Organisms, Springer, Amsterdam, 221-241. **nitrogenaasi** eri geenid bakterit

e dark septate fungus *Phialocephala fortinii* and *Asparagus officinalis* roots. Can. J. Microbiol. 47: 741-753.

phora

formatics platform for analyses of large 16S rDNA libraries. BMC Bioinform 7: 57

formatics platform for analyses of large 16S rDNA libraries. BMC Bioinform 7: 57

ence, and plasticity of six slipper orchids from South Western China. Mycorrhiza 20: 559-568.

phylogeny of the endophytic mycobiota in the roots of rare wild rice (*Oryza granulata*) from a nature reserve in Yunnan, China. Appl. Environ. Microbiol. 76: 1642-1652.

e-root nitrogen **Juurte N:P suhe on suurem troopikas, eksJ Juurte N:P suhe** on suurem troopikas, eksponentsiaalne seos; lehtede N:P suhe troopikas lin

e-root nitrogen and phosphorus. Nature Commun. 2: 1-6. **lehtede ja juurte N/C suhe on troopikas palju suurem kuna P on limiteerivam;**

mmun. Stat. 34: 2123-2131. **Nonparametric Maxi**

mmun. Stat. Theor. Meth. 34: 2123-2131.

ity in *Apostasia* (Orchidaceae) indicates the origin and evolution of orchid mycorrhiza. Am. J. Bot. 96: 1997-2009.

**Russ-lact**

) microarrays: a novel technique to study the species composition of complex microbial systems. Nucl. Ac. Res. 31: e95. **NotI** kõikuvatel regioonidel põhinev restrikti

b sademed, mitte EcM vs AM; Domin kandseened! Eriti Cryptococcus; männi-tsistuse kooslusest identif Inocybe x 2, Hebeloma x 2

5\* domin Fusarium; 45 ja 50\* domin Candida ethanolica

r pines. For. Sci. 10: 214-222.

*seidotusga menziesii* + *Poria terrestris* (blue- and orange-staining strains). Can. J. Bot. 47: 1833-1840.

gon vinicolor, *Poria terrestris*; Cenoc ja *Piloderma fallax* ei moodustanud ECM

oderma bicolor, Cenoc, *Pisol* -lühikirjeldused

ssist, mis omak **mikroobide PLFA mitmekesisus sõltub taimede** biomassist, mis omakorda on seotud taimede liigirikkusega Tilmani plottides; samas muutused mikroobikoos

**versiteet: kontseptsioon, põhimõtted, meetodid, ülevaade** **diversiteediindekseid** ei

orthern Chihuahuan desert. Mycologia 78: 840-841.

mmunity: role of abiotic and biotic factors. Can. J. Bot. 58: 1915-1922.

with *Castanea sativa*, *Quercus suber* and *Alnus cordata*. Agric. Ecosyst. Environ. 28: 563-567. **3 RE**

**inapizans ectomycorrhizas. Mycol. Res. 105: 611-614**

tential and habitat preference of native woody species in South Brazil. J. Trop. Ecol. 16: 603-622.

se and successional status in 80 woody species from south Brazil. J. Trop. Ecol. 19: 315-324.

giosperms revisited. Proc. Natl. Acad. Sci. 99: 6848-6853. **õistaimede** basaalne perek. On Amb

14. Three keys küllmas kliimasse tulekuks oli vaja taimedel juba peenikeste juhtsoonte olemasolu. Samas lehtede langetamine tekkis pärast kolimist j

ce Hall.

rd its affinity with the genus *Lecanicillium*. Mycol. Res. 112: 811-824.

ation in trees, soils and fungi in a natural forest stand and Norway spruce plantation. Ann. For. Sci. 64: 419-429.

strategy during truffle ascocarp development under holm oak. A response based on 13C and 15N natural abundance. Ann. For. Sci. 65: 607-617.

mate uuringute andmete põhjal on tegu *Tomentella* liigiga

d mycorrhizas, seeds and protocorms. Mycoscience 37: 439-448. **Ceratobas**

: southeastern Asian *Boletus indecorus*. Mycologia 104: 1420-1432.

e osakaal 79 vs 37%; seene RNA osakaal 64 vs 35%; ergosterooli konts 1,62 yg/mg vs 0.72 yg/mg

izal symbionts of oak. Ukr. Bot. Zh. 23: 62-66.

suhije stepi. Ukr. Bot. Zh. 10: 67-71.

and speciation of the mushroom species *Pleurotus cystidiosus* a **Pleurotus spp.** enamik liike esineb konkreetsetes makroregioonides, v üksikutel sõsargrupp kaugel -arv. Ku



omic infrastructure of the *Pleurotus eryngii* species-complex as determined by RAPD analysis, isozyme profiles and ecomorphological **Pleurotus eryngii**: populatsioonide ja populatsioonide genetiiline struktuur. In: Dighton J, White JF, Oudemans P, eds. The Fungal Community. Its Organization and Role in the Ecosystem. CRC Press, Boca Ray  
athogen *Mycosphaerella graminicola* is characterised by high nuclear diversity, low mitochondrial diversity, regular recombination, and gene flow. Fung. Genet. Biol. 38: 2  
us from Australia. Mycol. Res. 92: 192-198.

*dodendron fortunei* in subtropical forests of China. Mycorrhiza 19: 417-423.

ecosystems: global patterns and controlling factors. J. Plant Ecol. 1: 85-93.

ions: practice, problems and prospects. Mol. Ecol. 12: 563-584.

**populatsiooniuuringuteks** ja SNPde tuvastamiseks soovit SCAR praimerid; DHPLC kirjel

5-169. **kimalaste krüptilised liigid on tihti spetsialiseerunud** eri taimeliikidele. Samale liigile spetsialiseerunute koeksistentsi soodustab suguline allokatsioon

manita (Agaricales, Basidiomycota): taxonomic and biogeographic implications. Fung. Div. 17: 219-238.

**Amanita perek-sisene ITS, LSU**

(*Discula destructiva*) and the Diaporthales. Mycologia 93: 355-365.

**RNApol II SU; SSU: LSU**

**Diaporthales on monofüleetiline rüh**

AY, Rogers JD, Kohlmeyer J, Volkman-Kohlmeier B, Sung G-H. 2006. An overview of the systematics of the Sordariomycetes base **Sordariomycetes: Lulworthiales+Xy**

genus *Hymenoscyphus* (Ascomycetes, Helotiales). Nova Hedw. 78: 475-484. ITS

**Hymenoscyphus on v lai perekond, i**

ve *Kobresia* ja **Kobresia: levikukese Hiina-Tiibeti alpijaasad. Täl Kobresia: levikukese Hiina-Tiibeti alpijaasad. Tähtis keystone rühm. Aseks paljunemine risoomidega**

liable estimate of soil fungal biomass? Soil Biol. Biochem. 37: 311-317

ubunit rRNA hybridization probes for quantitative molecular microbial ecology studies. Appl. Environ. Microbiol. **dot blotid ül dot blotid** üksikute oligoprobe (15-18 nu) is

aprobic fungi. Mycol. Res. 105: 1449-1457.

ion. Appl. Environ. Microbiol. 62: 316-322.

**DNA eraldamine** mullast: 1% CTAB parem kui PVPP (40%

networks. mBio 1:e00169-10.

**network analüüs met**

work of soil microbial communities in response to elevated CO<sub>2</sub>. mBio 2:e00122-11.

**Geochip: mullaensüümide profiilide m**

iversity across various microbial taxa. Proc. Natl. Acad. Sci. USA 105: 7768-7773.

**mikroarrayd kasutamine** mikroobide tuvastamiseks, ka kes

studies. Curr. Opin. Biotechnol. 13: 204-207.

le ja fülogeeni diversiteet ning liigirikkus palju suurem, domineeriv; all tugev domineeriv **bakterid mullaprofiilis: 18S RFLP+sekv. Ülakihi liikide ja fülogeeni diversiteet ning liigirikk**

M. 2002. Spatial and resource factors influencing high microbial **bakterite diversiteeti mullas mõjutab C-rikkus, C-heterogeensus, konkurents, isola 1/D, lognorm** alfa: bakte

. Curr. Opin. Microbiol. 6: 288-294.

**mikroarrayd kasutamine** mikroobide tuvastamiseks, ka kes

diomycota) from Australia. Mycotaxon 122: 123-128.

us rubra) seedi **taimestiku katvus vs ECM koloniseeritus (opt 30...40%) jpt näitajad**

atsioon kõrvuti proovides

**T-RFLP: palju suurem lahutusvõime**

ev. Liigisisene

**ISSR (RAPD): 3 mikrosatelliitpraimerit, praimerite valik, bändid; RAPD markerite põhjal**

suillus grevillei populations in two Larix kaemferi stand over two years. J. Plant Res. 114: 179-188

**ISSR Suillus grevillei**

als gene flow within and between ectomycorrhizal *Suillus grevillei* populations. N **ISSR e SCAR mikrosatelliitmarkerid (3) Suillus grevillei jaoks -3 markerit ei võimalda kõ**

mycelia and ectomycorrhizae of *Suillus grevillei* genets. J. Plant Res. 114: 179-188

**SSR analüüs ECM juuretippudele liigispetsiifiliste markeritega**

rhizal fungi. Fung. Div. 33: 123-137.

nd identification of allelopathic compounds. J. Chem. Ecol. 20: 407-421.

plant systems. Trends Pl. Sci. 8: 407-409.

dpflanzen in Mitteleuropa. Hoppea 61: 43-55.

lophytes of the Helotiales in ericaceous plants and the grass, *Deschampsia flexuosa*. Stud. Mycol. 53: 147-162.

graphical and ecological distribution of nitrogen and carbon gains from fungi in pyroloids and monotropoids (Ericaceae) and in orchids. New Phytol. In press.

*llorhiza trifida* is a partial myco-heterotroph. New Phytol. 178: 395-400.

ve PCR. Biotechniques 21: 268-279.

**kvantit kompetit PCR**

obal Patterns of Bacterial Beta-Diversity in Seafloor and Seawa **bakterid mere**: pms erinevus bentose ja pelaagiliste koosluste vahel; bentose omadl tugevar

uts); erinevad klasterdamisalgoritmid; soovit MCL

ast; nt singletonide ja <50sekv-OTUde väljaviskamine ei muuda tulemusi kvalitatiivselt, ent väh **veeorganismide** kooslused: ülevaade metoodikast;

Ecology 43: 1 puuindiviidi mõju mullaomadustele: pH madalam ja N konts kõrgem puu lähedal

lg: it is time fo **levikueksperimentide kaasamine on vajalik BS v: levikueksperimentide kaasamine on vajalik BS vs ökosüs in eksperimentidesse, mis aitab planeerida ka kai**

limited by see **taimeliikide arv** kasvas kui lisati seemneid, eriti kontrollalal, **hääringu** tagajärjel

in an experime **puisniitu taastades metsa maha võttes on oluline niita raiesmikki, et suurendada taimeid liigirikkust. Ka juurte läbilõikamine suurendab liigirikkust ja võsude**

ological factor **taimede koeksist** eri teooriad: tutvustus -arv kõigil teooriatel oma osa eri kooslustes sõltuvalt proportsioonist. PUISNIITUD ON TÄHTIS LIIGIFOND JA REGULAARNE NII

**kõdulagunemine: varise BD mõjutab pos** seda lagundavate mikroobide funktsionaalset BDd (PLFA)



Tomentelloid trühvlid ECM-seened Orhideed, monotrop, MF patogeeneid, herbiv saprootfoide

meerides ja sekvensi viimases kolmandikus

ktid. LSU puhul on neid rohkem. Soovit eemaldada singletonid ja Illumina puhul OTUd, mida alla 10.

COI. Peaks kasutama 99.5% thresholdi.

on; enamik singletonidest on tõenäoliselt vigased järjestused  
rid, mis on perfect match 80% ja 89% vastavalt eri eukarüootidele  
ianumbrit

ismidele ja markeritele

: sarn täpsus, toob sisse vähem vigu

454: eri praimerid II

tud. ANDMETES on varjatud kasvukohatüübi efekt, mis eriti mõjutab seente liigirikkust. 454 ITS1

d üle-esindatud sekvenside seas; üks primeri mismatch langetab suht arvukust u 5-10 x.  
line proge

aktor

robleemid ja lahendused NGS analüüsiks. Surnud organismide DNA on lagunenu kuni 150 bp fragmentideks.  
issifitseeritud kui võrrelda RDP andmebaasiga

h ja tugev bias.

s

lemusi kui tava-Folmeri praimerid, ent osad taksonid siiski puudu. Kõiki variante pole võimalik arvestada, kuna spetsiifilisus kaob  
taminandid, heteroplasmiat, üldjuhul kõik indiviidisisesed variandid y 98% sarn

eristus SSU põhjal

tatud sekv arvu proovi kohta

seks

single-cell PCR - üldiselt sarnane, ent erinevused rühmades, kus on teada suured rDNA koopiate erinevused (alveolaadid); 454 pul  
avad 2,5x erinevaid BD tulemusi ja 7x erinevaid homopol tulemusi; hõimkonnad on võrdeliselt esindatud, ent dinoflagellaatide sug  
e mikroobidele sh nematoodidele; Universaalsete euk praimerite mismatchid seentel, molluskitel jpt-l

ärmiliikide fülogeograafia genoomide baasil. Sacch uvarum pärineb S-Am Nothofaguse ja Cyttaria juurest, ent korra levinud Põhj  
ndmetest, millest tuleneb väga suur seltsi-tasemel ebatäpsus (palju inimsekventse)

ksiooni. Tulemus sarnaneb ESPRIT-tree meetodile. ITS järjestuste väljalõikamine alternatiivsel moel PFTOOLS paketiga

prokarüootidele ja et

Soovit. Mock-communityt. Helvella spp ei saa kahepoolseid ega reverse sekventse

on suva asendused, qual v21,

s-mullas

uumilist mustrit ei ole; Mulla P mõj neg ja pH, taimedeBD ja kõrgus!! mõj pos liigirikkust; seente fülogen be seentekooslused Sve

replikaadid annavad eri tulemusi

ass max 10-30 a metsades enne hõrendamist

Lyman liustiku alt va

id aeg, käelikus

em erinevamate sekvensidega kooslustes; kimääritekkekoht on tavaliselt konserveerunud paigas, ei sõltu GC ega AT rikkusest.  
jestustel rohkem kimääre; samu kimääre võib olla rohkem kui 1 koopia, sest break-point on sama ja korduvalt tek uued; metagenoc  
ei saanud Cenoc. 454 eelistas kõrge G+C; klooneetimine A+T järjestusi. PCR replikaadid väga sarn omavahel  
iseks peab similarity olema 97% ja per-base error probability <math>\leq 0.2</math>. Muidu v palju artefakte homopol tõttu. Said 0.03 kontaminan

bias. 18S võttis kõige laiemalt

3ANisse

hiirte vahel, ent ka haigestumise ja sugude vahel (UniFrac). Eeldavad et püroseqv vead akumul sekventsides vahel juhuslikult  
sid putukate DNA segude peal mitmest proovialast. Valideerimiseks määratud isendid tohtus koguses  
mist. Markereid peaks olema mitu, üks neist ametlik triipkood; markerid peaks olema kindlasti liigi-tasemel resolutsiooniga, sest n  
võrra: denitrifikatsioon kasvab, geenide suht G+C content kasvab, CO dehüdrogenaas, respiratoorsed geenid kasvavad, bakterite ja  
e ja olulisuse jaoks. Üle 2x erineva katvusega proovide võrdlemist peaks vältima. Piisav katvus on 50%, mis mulla puhul tähendab  
imiseks NCBI taksonoomiat

lülis MEGANiga: kasutab identifitseerimiseks NCBI taksonoomiat

versiteedianalüüs, metatranskriptomika vs. Array-põhised tehnoloogiad (Geochip, Phylochip). Avatud meetodite puhul uute hõir  
-comm, kus kõigil genoomid sekveneeritud!. 454 puhul selge GC hälve, ent Illumina mitte. Metagenoom andis ka vasteid muudel  
noom saab kätte palju rohkemate hüimkondade ja perek 16S regiooni vrd ampikonidega. Bakteritel 0.1% kõigist geenidest on rDN  
al väheneb ja seente oma suureneb; domin kottseened; Glomeromycota polnud; . Tsellulassi tootsid veebr pms Leotiomycetes, mai  
leb arvestada ka tagide disainil, selleks Levenshtein e edit distance. Ed=3 lubab 1 bp parandada

fakt; vead tekitavad unikaalseid OTUsid

tsi, millest jäi 2.6M pärast proovideks jagamist; ühest mullaproovist 1550-3000 OTU; anniiling temperatuur mõjutas tugevasti OT  
suurendab täpsust, replikaatide sarnasust ja beta-diversiteeti. GC-content mängib rolli proovide konkureerimisel NGS analüüsis. Soc  
imaalne; eranditeks Laetiporus, Aspergillus sp, kus >1% sekventse tunduvalt erinevad.

mõju bakterikooslusele

mise pikkuse ja kvaliteedi vahel: AmpliconNoise vs QIIME; mothur vs acacia. Tulemuste parandamine muutes üksikuid parameet

ljude loomade sümbiondite kooslused sarn. Ka sisalikel olemas. 1000x erin sekventsides arvus

leks), Illumina, AB SoliD, HelisCope. Väga oluline arendada tarkvara ja hinnata sekv vigu; arhiveerimine

iD, HelisCope.

rmased, ent pyro oli tundlikum ja andis märksa rohkem OTUsid.

ni 30000 b; kvaliteet 1-way 70%, 2-way 85% õigeid

ni 30000 b; pms vead on mitmesed insertioonid ja N

geeni piirkondadele, sh plastiid, ITS2 ja mtDNA

iS analüüsiks. Lühemad jupid tulevad rohkem esile. Altern praimerite vahel on teatud eripärad koosluse str tuvastamises. Ruumeni:

0% on v raske amplifitseerida Phu polümeraasiga. Aitab segu-polümeraasi ja keemia kasutamine. PCR-vabadel tehnoloogiatel häh  
sid; Illumina toodab 2x rohkem liike kui 454, ent 3 altern põhjust: 30x rohkem sekventse, ITS1 vs kogu-ITS, platvormi-spets.

rDNA geenide 454 anal artefakt

ks. 20-kordsed erinevused eri seentel; osa seeni on viletsama kvaliteet-skooriga, esineb palju autapomorfseid vigu, mis ei tule välja kv  
ie Illumina HiSeq 2000 platvormil.

tuuri

le eemaldamine, kehvade nukleotiidide maskimine, Tagide tundmine, reverse-complementary, ITS ja LSU eraldamine,

b tagiti erineda 10x

e hõimk: kottseentest (41%) domin Onygenales, Pertusariales, Pleosporales, Hypocreales (Helotiales ja Pezizales 2%); kandseentes

>400 bp pole enam vahet. >1000 bp sekv edukus 10%. Arv kehva primerite sobivus vähendab BD, seetõttu tuleb lisada degenerat  
a analüüsi kiirust; eraldab ka kimääre

sed jupid annavad piisavalt head taksonoomilist infot

pH gradient ei mõj li

liima, mitte ehitisetüüp. LROR-F ja LR5-F

suured erinevused LSU ja SSU vahel; kui mingit liiki võtta kordades rohkem, ei peegeldu see pürode arvus; 0.6% sekventsides kiir

ekv. Praimerid 18S planktonis

taast. Eri tagid ei tekita statistilist erinevust

valiku korral võimalised tuvastama muutusi mikroobide koosluse struktuuris; vaja andmebaasi pikkade järjestustega

id sekventsidesle pakuvad 1% vea-kriteeriumi

iptoomide uuringutes: kriteeriumid, vajalikkus, metaandmete puudulikkus, falsifitseeritavus jms.

võimaldab töötluste taastada

giooni! erinevused linna- ja maapuude vahel ning eelkõige sesoonne muster - BD kasvab sesoonselt

juhuslikke insertioone. SSU V4 vs V9 erinevad suurel määral sekv-vigade poolest, interakteerudes masinaga. Titaniumil singleto

malüüside tõttu ei saa seente ja taimede osakaalu dieedis hinnata

did soosisid seda. Soovit single-linkage eelklasterdamist ja average-linkage klasterdamist, pikka saba see siiski ei vähenda. Paljud

te kasutamine. Soovit kasutada vähe sekventse, et vähendada artefakte; arvustisimul

rad ebaproports seega jaotunud. Eriti probleemsed homopolümeersed regioonid; kasvõi üht N sisaldavad järjestused, normaalsest p  
in inserts ja delets suva kohtades. U 300-400 bp pealt kvaliteet halveneb järsult; Vigade hulk sõltub ka pos Ptplaadil. Lüh jrk on lül

analyses of fungi. MycoKeys 10: 1-43.

on M, Parts K, Pärtel K, Otsing E, Nouhra E, Njouonkou AL, Nilsson RH, Morgado LN, Mayor J, May TW, Kohout P, Hosaka K, Hiiesalu I, Henkel T  
biases. New Phytol. 188: 291-301.

molecular identification of fungi – recent updates and future perspectives. New Phytol. 186: 281-285.

mõõdukad. ITS1F ei amplifitseeri mitmeid seenerühmi. ITS4B vilets - spets kandseentele, ent jätab välja paljud rühmad  
extractor ITSx

ad. Koosluse struktuuri mõjutab nii seentel kui bakteritel induts pöud, ent CO2 ja temp polnud olulised **seeded vs CO2, temp**

jaoks on ITS7o-ITS4: ITS2 regioon

klaadi: euagaric; boletoid (athelioid); hymenochaetoid (corticoid); phlebioid; russuloid; polyporoid (trechisporoid); theleporoid; gomphoid; cantharello

updated fungal ITS sequence dataset for reference-based chimera control in environmental sequencing efforts. Microbes and Environments (in press).

iku analüüsis põhjustab erisusi. Mõju Arvestatakse maha regressioonanalüüsi käigus

2 ja LSU annavad sama täpseid määranguid duguk tasemel. Täpsus sama ITS2 puhul. Ka perk-tasemel. Koos bootstrapi 50% arvut

õhiste analüüside statistika

Boonyuen N, Burgaz AR, Buyck B, Cai L, Cai Q, Cardinali G, Chaverri P, Coppins BJ, Crespo A, Cubas P, Cummings C, Damm U, de Beer ZW, de F

ides parem kui triipkoodistamise geenidel; ITS1 eristab pisut paremini kui ITS2, ent ITS1 pikkus varieerub rohkem kui ITS2. Vrt

ae-ga tek väh 3x, var liikide vahel väike, näitab kiiret radieerumist hiljuti cruliniiforme rühmas. Bioloogiliste liikide vahel tihti erir  
dab kaht monoklaariõniti (lahknevad 50. **Hebeloma sp.**

: bioloogilised liigid pooleldi sobimatud; mõni tundub olevat kahe teise hübriid tuuma ja mt DNA põhjal (IGS vs CTB); liigiteket on mõjutanud geogr. A  
: 22 bioloogilist liiki, mis on paiguti parafüleetilised ning morf eristamatud. Kompromissina 4 feneetilist liiki

**Cephalanthera longifolia albiinod** vs FS taimed -kolonis Tomentella-Thelephora liig  
gical and taxonomic research with an online implementation for fungal ITS sequences. Evol. Bioinform. 6: 189-196.

millest enamus olid kimäärid). Barcoding kriteerium 99%, prooviti ka 98% ja 97%, ent erilist vahet polnd  
tuse ja jrk analüüs: Ceanothuse (ja tammede) eri alamperek liigid esinevad koos, aga mitte alamperek siseselt

miseks bakteritel, mängimine formamiidiga, oligotel kompetiitorite kasutamine, 14C-rRNA eraldamine gradienttsentrifuugiga

Fomes

semne ja liigirikkam kui varzea. Siin-seal, eriti saartel kasvab ka Cocolobat; Glatsiaalsükliid on igapode leviala v tugevasti mõjut  
protistide ökoloogia

Suillus bovinus

Piceirhiza

Amaurodoni AUSAUS uus liik. Cunninghamsi A. viridist peab Tomentellaks. Risomorfid tsentraalsete hüüfidega, v sarn Boletalestele. Märkas, et väga agaralt osa AUSs

Ramaria: subgen Ler

Entoloma saepium: ECM vs parasit? Pigem parasit

Entoloma saepium: ECM vs parasit? Pigem parasit viljakahade produktsioon

T. albom., Bankeraaceae, Thelephoraceae

Xerocomus ja Gomphidius

äidet ei saa olla sõsarliigid. Tuberial 2 mantlitüüpi; Geastrum ei mood HN; Eri RM tüüpide, cys ja mantlitüüpide funkts tähtsus. ened liigivaesed, sügavuti liigirikkus väheneb. Seentel 18S rDNA, Kowalchuk 1999 praimerid ja meetodika

bakterid ja seened. DGC

Boletus aereus, edulis, reticulatus Cistus sp-l; Boletus pinophilus ei mood EcM Cistusega

Laccaria, Hebeloma

ata sp nov, Coltriciella navispora sp nov -mõl assots tugevasti lagunenuid puidu ja EcM Dicymbe metsadega

; praimerid, protokollid optimiseerimine

Laccaria proxima

patrellaceae on sõsartaksonid. Am v sagedased maasiseste vk vormid eae ja Gomphales näitel

kitinaasid ja peroksidaasid olid eriti aktiivsed agressiivsete Pisolithuse vahel

OrM: Goodyera repens vs Ceratobas cornigerum: MR taimne 32P ylesvott palju ef-s Ceratobasidium cornigerum: kõik isolaadid stimuleerivad seemnete idanemist, ent kasvu st

kui toitainete lisamisest. MR roll ka arv Al detoksifits. EcM seente BD troopikas arv >= parasvõttes

grinioD, Julbernardia, Brachystegia, TetraBerlinia, Microberlinia, Isoberlinia, Berlinia, Paramacrolobium, Anthonotha, Monopetal: karpide vikariantsuse hüpoteesi ja 135 MY vanuse

kelihhood vs most parsimony. Baieesia meetodid suudavad pakkuda kõrgemat usaldust, eriti lühikeste sõlmede puhul ja tunnuste vähesuse korral. Samas danemist stimuleerivad spooride idanemine bakterite mõjul

ka seemed, mis viljuvad ainult jämedel puidul; kult ja viljakehad andsid eritulemuse. T-RFLP tuvastas vaid 5 liiki, seega v vilet raceae

ga nimetamise ja omaduste kohta; <http://www.cme.msu.edu/OPD>.

(seonduvad membraanile), DNA suuremates kogustes( interakts RNAga), polyA suuremates kogustes. Ei soovitata kasutada Dnaase, sest need lagund I utamiseks. Võimaldab hinnata mõlema osapoole jaoks eraldi. Kui maatriksis on alla 10% kaetud, teeb vähem vigu kui varasemad r tega põhjustab sellist str. l; modelleerimine

aldamine ning PCR

oht koos Cistaceae ja Quercusega)

sphatase - aktiivsus mükoriisas sõltuvalt seeneliigist kas HN-s või seenmantlis. Väetades HN-s olev ens-akt suurenes - arv suurem osartriibuse Dombeyoideaga seltsis Malvales. Malvales s.l. hõlmab ka Cistaceae ja Dipterocarpaceae.

.järel kloonide suhtelise arvu lugemine on jama; ARB tarkvara kasutamine

Rhizopogon

obleem

Tuber spp: maculatum, T. borchii, Sphaerosporella

Tuber spp: maculatum, T. borchii, Sphaerosporella

Pulvinula

seotud tamme ja arbutoididega

ibuses Chrysophylleae on Pradosia. Klaad ise täielik kamm. Sõsarperek Chrysophyllum, Synsepalum, Pouteria, Omphalocarpum, Micropholis, Leptosty Arv kõik teised Ericaceae liikmete eellised olid sarn Enkianthuse moodi puuga

icobasidion, Tulasnella, Sebacina, Thar Rhizoctonia kompleksi rühmad: Helicobasidion, Tulasnell; Rhizoctonia kompleksi rühm Rhizoctonia kompleksi

Penicillium sp, Verticill

o outgruppidega ning ITS algn üle kogu seeneriigi

omastamine

Pisolithus

Pisolithus

ie ordni faktoritega tunnustele, telgede arvu autom tuvastamine

ward distantssi-põhised redundancy ordni RDA

BD Hondurases ekstrapoleerimine Chao2, jackknife ja bootstrap abil. Proovide arvu suurendades suureneb Chao2 pooltel juhtudest (vahemikus 5-15); 1

lpinoideae: noored taimed!

ülevaade kvaliteedikontrollist nakatamise efektiivsuse uurimisel

es varase st seentel ja kasvas hilistel seentel

bakterid, arhed ja seened

nodelling AM seente kooslustes. AM-seend mõj muid ökosis komponente ja seeläbi kk-protsesse kliimamuutustes

slusi ja positiivset tagasisidet seemikkute elumusele. Peremeestaim otse EcM seenekooslust ei mõjuta.

amine -uus meetod azure A, B, C abil

ta väiksemat väljasuremist, pigem on väljasuremine seal ka kiirem

ripõhine vs otse PCR+kloneerimine: mõnevõrra erinev, koosluste sarn madal. Kloneerimisega rohkem kandseeni ja suurem mitmekesisus, vähem Sordar

ülogeneet allikas taimede endofüütidele. Endofüütide ja parasitide vahel palju üleminekuid; saproobsuse paljukordne teke eriti pa

vs ECM: langus arvukus

Piloderma croceum

vähenev EL maades

Piloderma croceum

Piloderma fallax

muutused ajas

kidel väga erinevad aktiivsuseajad; MnP, LiP, Lakaaside mootmine; arv. kõik 3 ens samaväärse tähtsusega  
teerimine: azure B meetod on palju parem kui tradits VA meetod

lited: Wilcoxina, Suillus spp, värskel hirvesitt: Suillus spp, Rhizopogon spp, Tom subliil; kuivand hirvesitt: Rhizopogon spp, Suillusi v vähe. Arv et Suill  
ll palju kooretükke ja oksid.

üig. Juurte horis ulatus väh 19m; Pomaderrisel v pinnalähedane juurestik (0-15 cm) levikuga 1,8-3,6 m tüvest eemale. Ankurjuured ulatuvad 65 cm süg-r

Eucalyptus regnansil: Cort purpurascens (ka Pomaderrisel). Ektendo-tüüp siledatel (sh Eucalyptus regnansil: C

ndadesse isolatsiooni tõttu: Dipterocarpaceae ja Dilleniaceae; paljud iseloomulikud rühmad puudu

tek vihmametsa liikidest 2 MA jooksul. Liigirikkaim Borneo, endeeme vähe, v.a. Sri Lankal. Võrreldav bioloogia pöögilistega, kes on arv suurimad kon

analüüsi; hydrothermal vendid on suurima arhede linidzirikkusega- arv arhed seal tek.;

d. Mikroobide ensümaatilise toodang erineb taimede omast;

C:N 18-20 on piir, k

lest. Kuna s.o. Väga püsiv, arv on tegu heterokartiiootsusega

DNA põhjal ei saa kätte kooslust. PCR põhisüüdlane. Kloonimine+sekv annab >90 klooni puhul 90% liikidest 20 liigi segu puhul,

nktmutatsioonid ja pikkuse polümorfism, mis annab lisabände. Lisabände annab sageli mittetäielik restriksioon; T-RFLP bände ei tohi kasutada koguliig

Genoc

l fülog anal parall.

ge stat

analüüs

Pisolithus, Amanita, Scleroderma sünt Afzelia africanaga. Uapaca all olevad seened ei mood Ec!

Paxillus, Laccaria, Coltricia, Lactarius hepaticus

Laccaria, Suillus, Rhizopogon

vs saprotroofid: Laccariaia, Cenococcum, Rhizopogon

mikro- ja makroseened v

seente poolt. VIITED.

, ent meelitavad parasitoide  
a case study. ISME J. 7: 244-255.

letamisele. Metsad on toitainete-rikkamad kui savannid

erpotrichiellaceae on mullas elavad mustad pärmid, millest paljud ka patogeendid ja elunevad ekstreemsetes paikades. ErM seened s  
niidide lohkumiseks on munapeks, detektsioon 10...100 korda parem kui kultuurplaatidele viimine Trichoderma viride

undite osakal, mulla tihedus langeb. Muutused eriti pindmises 10 cm mullas. 12 a jooksul taimkate nagu loodusl, muld sügavamal siiski mitte

dide kasutamine suurendab taimede dominantsust ja vähendab elurikkust Janzen-Connelli fenomen on tugevam taimede  
eet kauged; lähedased mitte.



: 11-29.

. Ecol. 75: 313–320.

es kui kuivatatud või lahustesse topitud juurtes.

õlsem dipterokarp on Irian Jaya lääneosas *Hopea* sp

õdang -suur ajaline varieeruvus, eriti alguses

Pleurotus ostreatus

si lagund ens: CBH, beta-glukanase, beta-glucosidase ens kandseentel: ülevaade

nii taimedel kui v paljudel eri kand ja kottseentel. Opt pH = 4; pms toodetakse varise ja puidulagundamisel, komposti tekkes, samuti antagonistlike reaktsioonidega. M seened ei käitu fakult saproobiidena; pakub altern lahendusi mitmetele töödele ja hindab kriitiliselt meetodite puudujääke ning

2: 1746-1758.

seguga

*occoloba uvifera* L.) seedlings. Mycorr: Scleroderma

Tuber borchii

ikkused johtuvad suktessiooniaparaadest; suktessiooni käigus järk-järgult lisandub taimede tagasiside mulla patogeenidega, SLAIDID

eri kõrrelised mõjutavad

mikroobide arvukus suu

akaaalu ning kiirendab N ringet

Rhinanthus minor hemiparasiit suurendab taimede ma

isosfäärides vrd teiste taimede ja palja mullaga

k ikka niru

asid vs kemikaalid valge-mädanik-seentel. ülevaade, JOONISED, kineetika, pseudokineetika

tasolu analüüsis vjalik; liigitikke kiiruse määramine, harude vanuse määramine; näitab et pleistotseenis on liigitikke kiirus peale jääaega jäänud samaks; a nende parasiitide, patogeenide, herbivooride vahel: generalistliigid võivad koosneda tugevalt spetsiaalselt genotüüpidest; evolutsiooni

ed ei lange kokku kohalike liikidega

Pleurotus ostreatus: söö

, Andid; KAARDID

a levinud mitmeid kordi AUSst ja arv korra PNGst, kus edasi on toimunud kiire ja põhjalik divergeerumine. L-Ams ja AAFRs levinud klaadid on basaalsed

16-3852.

etelevitajad ja tolmeldajad olif rohkem nsted kui toi duahelad. Mida rohkem on koosluses interaktsioone (seos liigirikkkusega) positiivsed seosed vastastikuselt välistavad üksteist; see on seletatav koevol komplementaarsuse v konvergentsiga. Liikide jõud sõltub populatsiooniloo: ülevaade ja kontsepts

np võõtmes

mullaseened; RNA vs D

oc1; Cort1; Cort2; Lact2; 2y ajutiselt mittepõlenud; Russ1; Thel6; Russ2; Thel5. Thelephoraceae eelistas 2 y põletamist; Cortinariaceae ja Pisolithus ee

N madal; madal liigirikkus, kaks dominantti üle kogu mandri.

ite teke polnud häiritud. Lepaliikidel erinevad vastused

Berlin, Germany.

inne arrayle; DNA fragmenteerimine 95°C + radikaalide juuresolekul; GuSCN kemikaal seondumiseks

palju: Piloderma, Pisolithus, Laccaria, Cenococcum...

:gamini. Tilia üksikult (Craigiat pole analüüsitud). Dipterokarpuselised ja tsistuselised samas seltsis s.l.

nerevees ja parasiidid; saproobid tek hiljem; ülevaade kõigi rühmade ökoloogiast juured vs lehed Lepanthes orhideel. Mõlemis domineerivad Rhizoctonia-Ceratobas

puuvillataimede juured kult + sekv: Fusarium spp, Ne

Scleroderma Gnetumil: parandab P ja N kättesaadavust, seda ka nõrga P-väetamise korral

7-168.

Pisolithus, Scleroderma

Stereum

kasutusel; 3% kriteerium ei tööta paljudel kas liiga madal v kõrge; iga kirjeldatud liik peaks kaasama ka ITS sekvensi

Pisolithus

el, pärmil. 16(18S) rDNA. Probede fluorestsents sõltus tugevasti probe de asetusest DNA konformatsioonis: v raske hinnata. Prokariotidel olid olulise

nel DNAd sealt kus komplekskoosluses teda ei tabatud

iline vanus:

AAGTT

ae), Acacia spp; Angophora, Baeckea, Eucalyptus, Kunzea, Leptospermum (Myrt)

l, PPO, peroksüdaasid...

Paxillus

. Paxillus, Pisolithus, Suillus bovinus

. xxx

Piloderma (piiratud ligninaasne aktiivsus) paljud

‡ FDR Bonferroni analoogina

et. Jääaegadel puude pop-d surid P-Eur välja (vb mänd, Salix, Betula mitte), ent pop-d ei levinud pärast jää pealetungi tagasi, sõltu

ata andmeid.

n. *Microbiol.* 77: 3351-3359.

: on sama efektiivne või rohkemgi kui DNA eraldusega

v mol kell annab liiga vanu ennustusi, sest viga on Poissoni jaot ja liiga palju on valesid ja puuduvaid andmeid, mis võimenduvad kauges minevikus veel

390 MA, roosted 330MA, Tremellales 230MA,

ta fülogeneesis, praaimerid, duplikatsioon jms; puude kalibreerimine: 1 seened-loomad 965 Ma 2 maismaataimed 600 Ma 3 Glomales 390 Ma, 4 septade;

leetiline; Pleosporles monofüleetiline

ivalt suurem diversiteet kui varem arvatud

Rhizopogon

Endogone pisiformis: saprotroof nii turbasambla kui laukude surevatel lehtedel, männig; Endogone pisiformis: sa

mullaseente kultuuripõh

kn sp; taksonitest Helotiales, SordM, Capronia s.l., Umbelopsis

matsutake

torikulised ja resupinaat

uureneb geogr distantsiga; kasvab ka mitte-monofüleet liikide osakaal (arv incomplete lineage sorting tõttu). Liigikriteerium mitte

:seentel usaldatav

ergosterooli mõõtmine j

adi eritiärs

asest jääajast, arv põhj viljakehade hiline valmimine  
netit, geneetiline varieeruvus kasvab pu Tuber melanosporum  
ev puhastamine probe de sünteesiks; PCR-sünteesitud probe del u 5°C kõrgem Tm kui ostetud probe del

accaria. Eoste põhjal sitast.

nber C-ühendeid

a. BIOLOG plaadid ja AMF eosed ja Collembola andsid mitteolulise tulemuse. Funktsionaalsus ei muutunud. Ühelgi juhul ei mõj t

koikide mullaorganismide koosmoju taimedele. Negatiivne mõju

Tulasnella spp Cryptothallus Tulasnella spp Cryptothallus mirabilisel

OrM: rohelistel orhideedel lai peremeesring: Cephalanthera damasonium: Cortinari  
maksasamblad: mükohet tek ühel korral EcM Tulasnelladega. Sam per

Suillus, Paxillus

sed taimed võisid olla seotud Zygomycotaga ja seejärel GlomeroM.

Mükoheterotroofide evol ökol: fülogenees, toitumine jms

õdupleksid, kimäärid: ülevaade ja kuidas vältida

toididele ja monotropoididele; eri mon Monotropoidne. eri monotropoidide liigid kitsalt seotud eri suguk. Seentega: Russulaceae, Hydnellu, Tricholon

i võrdlemine rarefactioni abil

mikroseente diversiteedi või mikroseente diversiteedi

is) on Sclerodermatineae basaalsed harud

: pidev divergeerumine edasitagasi koigis klaadides, sh ka Cantharelloidide juures (k.A. Tulasnella, Ceratobasidium, Sebacia. Selles osas lahkavamus  
kladistika

pruunmäd-seentest: 1) Austropaxillus, Gymnopaxillus; 2) Rhizopogon+Gomphidius+Suillus) + (Paxillus, Melanogaster) + Gyrodon + (Scleroderma, Pis  
toimus 50 MAT, mitte kohe K/T piiril

emid, tõlgendus, lahendused

mikroseente diversiteet kõva mikroseente diversiteet

.

Phanerochaete, Phellinu  
trahheede seinad valgen  
pocket-rot, traskumädan  
puidulagunemise eritiüt  
Phellinus igniarius: tuba

ikistada AM-taimede tulekut

Paxillus involutus  
Paxillus, Pisolithus, Suillus spp.

rtus ei sõltu N-st, ent oluliseks saamine tahab reeglina üle 20 liigi. Töötavad vaid univariate juhtudel. Eri tunnuste K väärtusi saab om

üüisiks ja proovivõtuks; eri alade kasutamine võib tuua artefaktid

ülevaade interaktsioonid

laasid Class II on rohked Russula, Lactarius ja Cortinarius liikidel, ka Hygrophorus ja Gomphusel. Cortinariusel mitu isovormi  
ndseeded kuuluvad fülogen. Pms euagaie ja poliporoidide hulka. Tõen. Kõik saproobid. Mitmed mood omaette klaade.

täpne ülevaade probe de disainist ja diskussioon selle üle; protokoll optimeerimine ja diskussioon. Pesemine DMSO mitte SDSga

ycetidae (sh Cenoc, Ord inc.sedis - sõsarrühm Glonium; mõl Gloniaceae). Seltside ja suguk kirjeldused ja määrarjad

ise faasis  
he-eelistus.

mõõtmise alternatiivid: parameetriselised, mitteparameetriselised ja fülogeneetilised lahendused; VIITED

**Amanita pantherina, rubescens, vaginata**; Boletus edulis, luridus, Lecc scabrum, Xeroc subtomeni

pikkus väh 75% originaalist, Phred =3, N<sup>+</sup>=0; r=3 (maks lubatud madalakvaliteedilisi järjest)

**Suillus, Paxillus**

aftamaardlate õli-vee segus: 16S rRNA: uued liigid, substraadi utilisatsioon

iline roll koosluste kujundajana ja puude represseerijana. Põlengutest sõltuvad ökosüüs tek enne inimese teket. Põlengualade floora kogu Maaailmas väga

us 3-4% erinevust

nulllaga, füüsilise häiringuga mullapinnale

Soil Ecol. 18: 193-204.

**Paxillus**

idanemine seente poolt: Pterostylis -Ceratobas; Caladenia -Sebacina EcM vorm; Pr

lumus vahepealne kui puudub nii juurte kui vanempuude EcM seente mytseeliga kontakt ja korgeim kui on ainult mytseelivorgustikuga kontakt. AM vah

LDAs eraldatakse ruumiline var, faktorite var ja nende ühisosa. Vektorid saab k kanoon koefitsientidena

vektorite analüüs

oodust taime stabiilsust. Arv. Jäeti olulised muutujad "abundance" ja "average size" mudelitest välja

hofagusega. Arv Rozites on hiljem üle läinud ka teistele peremeestaimedele kusiganes need kattuvad (eukalüptid, pöögilised). Ei usu, et Rozites on läim

Descolea maculata, Pisolithus tinctorius and Laccaria laccata

AUS v liigi- ja perek-rikas, NZL vaesem. Maapealsed sugulased. Sh AUS-sse introduts perek; Pezizales v vähe. Phallales maap VK liigid on tek hüpop li

M Eucalyptus 2 spp-l, ent mitte männiga. Arv, et Descolea oli algselt seotud Nothofagusega, ent tertsiaris kliima muutudes ja Nothof välja sures nakat

1-91.

Descolea maculata, Pisolithus tinctorius and Laccaria laccata

alüptus grandise all

**AUS EcM seente BD on u 6500** liiki, arvestades 660 liigi olemasolu ja 10% liikide kirjeldamist

**Pterostylis - Ceratobas; Acianthus - Tulasnella; Caladenia - Sebacina v  
Rhizanthella gardneri** saab kuni 6% puu C-st endale (v.a. respir); Gly s;

väga. Juure DGGE annab vähem liike kui kultuuride sekv

ine eri jackknife meetoditega: liikide erinevatel tuvastamisvõimalustel olulinet roll liigirikkuse hindamisel

Magnaporthe, Fusarium

ed

**Paxillus, Hebeloma, Laccaria, Pisolithus**

hästi piiritletud rühmaks ITS sekvenside alusel. Eristusid virulentsed ja vähevirelentsed tüved ning peremeestaim järgi.

s taime biomassi ei mojanud see kuidagi, makrofauna kohalolek vähendas tugevasti AM kolonisatsiooni

-põhise distantsmaatriksi koostamiseks

-põhise distantsmaatriksi koostamiseks

etriaga mõõtmine

ivaimaks ja universaalseimaks fülogeneetilist. Pooldav liberaalset mikroliikide liikideks tegemist, sest enamasti on neil oma nishid: parasitidel pms oma

ka in vitro

**Terfezia terfezoides**

palju

mine

ri ühtluse indeks

many.

egiooni. Asterids: euasterids ja Ericales sõsarrühmad, Ericales: v palju sugukondi. Cornales Ericales+euasterids sõsarrühm

is-väga erinev), Austropaxillus, Gyrodon (sarnane)

l, Seisellidest 65 MAT, kollisioon Aasiaga 65-55 MAT, lõplikult 42-55 MAT. pidev ühendus Aafrikaga; ei tekkinud erilisi taimi ega loomi seetõttu. Indi

dest eksemplaridest ei saa DNAd õi sekventsi kätte, suurem kontamin; 69% herbaareksemplaridest ei õnnestunud liigini määrata 9 done

id on evol jooksul iseseisvalt tekkinud, mimitseerides mutualiste; pms pole ekspluateerimine v kallis ega mõj oluliselt fitnessi; paljud mutualistid võimald aledooniast SE-Aasiani. Teiste lähiperek -Regelia, Phymatocarpus, Lamarchea, Calothamnus, Eremaea, Callistemon, Beaufortia, Conothamnus levik on se hind

ntse jäi järgi pärast kvaliteedikontrolle. Palju vigu sekventsi alguses.

a reostus

Laccaria proxima, L. laccata

n T, Schuldt A, Seidler G, von Oheimb G, Welk E, Wirth C, Wubet T, Yang XF, Yu MJ, Zhang SR, Zhou HZ, Fischer M, Ma KP, Schmid B. 2014. Design

Paxillus

. Cryptandra, Trymalium (Rhamn) mood EcM ja AM vähem. Osad Myrtaceae, kõik Acacia, enamus Papilionaceae mood vaid AM, Stylidiaceae ja Goo

Boletinellus merulioides: Boletinellus merulio

evolutsiooniline mükoriisa teke

Mükoriisa definitsioonid. Paljud EcM raportid on tegelikult 'beaded VAM'

parasiitidel, karnivooridel, klasterjuursetel, hüdrofüütidel. Definitsioon ja diagnoos EcM ja AM taimedele, ülevaade kahtlastest tea itic regions. For. Ecol. Manage. 209: 15 Eucalyptus sünt AUS ja Hiinas; eostest ja kultuurist: Amanita, Descolea, Laccaria, Boletus, Piso rus: I. Afzelia+Intsia; II Macrolobieae: Berlinia, Gilbertiodendron, Brachystegia, Anthonotha, Julbenardia, Oddoniodendron, Bikinia, Icuria, Aphanocal

vs ECM lepikeutes. Sapr

Hebeloma

Hebeloma crustuliniforme

kõrge N korral

is seostuvad eri peremeestega. Vrd R. Pumila vs alnetorum. Läh liigid R. Atropurpurea, R. Norvegica. Alaska liigid on arv seotud vaid Alnus crispaga. C

Hebeloma spp

inema byssoides

Sarcodes ja Pterospora: vaid Rhizopogon spp stimul idanemist ja laboris idanevad vaid mittetalvitunud seemned.

simoonia, ML, NJ; ECM seente ja taimede koevolutsioon, ECM teke mitmeid kordi; Hibbett 2000 andmete ülevaatamine, arv ECM tekib sagemini kui k CWD: ECM diversiteedi põhjustaja ECM diversiteedi põhjustaja

Amanita, Heimioportus betula (Bol.), Xeroc chrysent, Lacc lacc, Leucopaxillus albissimus (Clito

e vs keskkonnaparam võrdluseks

soolakutaimede lagunda

ike. Raske midagi väita puuduliku uurimuse tõttu

Paxillus, Suillus bovinus

7. Laccaria  
sisus korvi kohta väiksem lõuna poole, ent eri rühmades veidi erinev. Kumulatiivne prooviala kohta sama. Skaala Kesk-Kanadast 5  
ilju harusid soojas kliimas;  
NE FRA tammikus: domin Tomentella NE FRA tammikus: domin Tomentella spp ja Russ/Lact spp. Vaid Tom ja Lact spp esinesid mulda pandud puus  
: 189-212.  
jt talveseenend metaboolselt aktiivsed talvel, Cenoc jt suveseenend aktiivsed rohkem suvel; fosfataasi aj dehidrogenaasi akt

roplasti ja mitokonrit  
Pisolithus tinctorius palju isolaate

paari ITS regioonile, sh 58A2, NS11, NLB4. T-RFLP tekitab kaheldava õigsusega mustreid, mida ei tuvastatud hiljem sekveneerimisega. Re3konstrueeri  
on tugev korrelatsioon piigi pindala ja juuretippude arvu vahel ( $R^2=0.28; 0.54; 0.56; y=0.77x; 0.77X; 0.44x$ ), ent ülejäänud sagedastel tüüpidel seost ei  
d ECM pole

Suillus, Pisolithus, Cortinarius

Phanerochaete

liseerumine. Autor eelistab morf konts. V sageli morf ja fülogeneet konts ei lähe kokku, eriti allopatrilistel juhtudel. Somaatiline tõrjuvus palju tugevam  
eenis, tek arv kriidi lõpus. Siis domin paljasseemne taimed

Armillaria spp. Vs Megacoll; Armillaria spp. Vs Meg

õrgustiku rakkude vahel. Sellinsed stru Morchella rotunda kuusel: koloniseerib nii juuretippe kui ka suberiseerunud jämejuuri n Morchella rotunda kuus  
tte läbi Paxilluse seenmantli. Mitte-MR Paxillus involutus, Laccaria laccata Cyndrocarpon destructans vs Paxillus involutus, La

l: keemiline koostis, definitsioon; mitmeid eritüüpe tekke järgi. Bakteritel, kandseentel ja kottseentel erinev melaniin. Bakteril n melaniinid: keemiline ke  
d online portaalis GUSTA ME. Interaktiivsed soovitusel ja juhised

Russula üht klaadi, mis v haruldane ja eri 4 liiki assots oksapuude, pöögiliste või dipterokarpidega

pterokarpide metsast

Tricholoma, Laccaria, Pezizales pole teada; Zairis 20 liiki Cantharellales, palju Russulales, Amanita, 50 liiki Boletales; Suurim liigirikkus Zairis ja Kam  
ametsades kui miombodes  
muutunud seenetarbijateks

Scleroderma sinnamariensega inokul soodustab Gnetum gnemon taimede kasvu

Tylospora

rid, lagundajad

xxx: füsioloogia

füsioloogia

Xenasmatella vagal c

xxx risomorfi str

legradatsioon ja lignolyyis:ylevaade

varieeruvus metaboolsetes ja füsiol pr liigisisene varieeruvus metaboolsetes ja füsiol protsessides EcM seentel tuvastatud pea igas uuringus

itum venetum (Apocynaceae), Echinops (Asteraceae), Rubia tenuifolia, Paronychia (Illecebraceae)

ra finlandica ja Phialocephala lagund tselluloosi jm polüsahhariide

itud target parem, kuigi PCR inhibiitorid. Ka hübriidatsioonil oma inhibiitorid, erinev temp; isendite identifitseerimine

; alamlimitide tuvastamine, 32X parem kui geelektroforees

erides. Eri taimede risosfääris eri pH ning DCA põhjal eri mikroobide kooslused

meerikas

Centaurea vohamine Am

teerumine tänu mäetekke protsessidele ja populatsioonide isoleeritusele; taimedel ei esine

mükorisosfääri seened j:

Agaricus

hala fortinii ja Phialophora finlandia suudavad lagund polüsahh tselluloosi, tärklist, ksülaani, rasvhapete estreid, valke, mitte ag; Phialophora finlandia  
:rimine, täissekvents ja võrdlus teiste geenidega ning AC viited  
LiP molekulaarstruktuuride võrdlus, pildid. VP kui uus liik peroksidaase või hübrid

Orhidee annab seenele rohkem C kui ise vastu saab  
Goodyera repens: seen (Ceratobasidium cornigerum) ja taime vastastikune 13C 1:  
Corallorhiza fotosünt efektiivsus on võrreldav Neottiaga

arud Apostasioideae, (Cypridioideae + Vanilloideae)

: algoritmi, millega liidetaks uusi sekventse olemasolevasse aligneeringusse viirus: seened taimeviiruste vektoritena. Olpidium, Oc

ekooslustes on BD efekt suht suurem; maismaa kooslustes nii BD kui liigi efekt; BD ja funktsionaalsuse suhe on parimini kirjeldatud

hüüfid on võimelised elus-samblast toitaineid välja imema hüüfid on võimelised elus-samblast toitaineid välja im

Irappõllul ja nisupõllul eri seened, misul sõltusid sellest kui kaua oli eelnevalt seal nisu või oder olnud mikroseed odra ja nisujuur mikroseed odra ja nisu

Hebeloma cylindrosporium, Rhizopogon roseolus  
iste VK, kasvab Cocoloba belizensis ja Neea sp all; ITS ja LSU lähedane Stephanosporaceae-le  
Rhizopogon spp.

izalestest ja sünonüümika  
Populus spp all arv EcM

horus AG3 eristab tubaka- ja kartuli spets tüved omaette rühmadesse. AG sees on somaatilise mitte Rhizoctonia solani-Thanatephorus AG3 eristab tubak

troobidele SSU ja metagenoomi põhjal. Koosolevatel genomidel sarnasus, GC, fülogeen sarnasus 85-90%

te muutlikkus

ete transferaasid: pH, vanus (väheneb) Paxillus  
tamine Tylospora: MnP

ECM & orchid  
ntifitseerimiseks. Fikseerivad chaperonprobed ja biotiin-märgistatud probe. V palju sõltus, kui kaugel asus teine probe ->14nu, et oleks perek-spets hübrid  
rel geogr distantiga

Armillaria vs Hypholoma Armillaria vs Hypholoma

umageen e. Hübridis vs lihtsus. xxx

s seente metaanalüüsideks  
lakaase ei transkribeerita Pilodema byssinum jt

osakaal EMH ITSs suur

Pisolithus ssp.

peroksidaase ei leitud; LiP eriti Tylosp palju; ligninaaside olemasolu

eb subgen Salix ja subgen Chamaetia+Vetrix+Chosenia+Toisusu+Triandrae

orhiza 16: 251-259.

Scleroderma spp: männi ja eukalüpti kolonis eri liikidel ja sama liigi isolaatidel erinev. Tehti suurt vahet ka männi

:

a lepp sösarrühmad, sarapuu ja valgepöök lähedalt seotud

Eukalüpti EcM seened eukalüpti liikide vahel ei vali, ent männi ei nakata. Samuti ei lähe eukalüptile Suillus ja R  
Eukalüptidel ülevaade

odistamiseks ITSil (er ITS2) kõige suurem disk-r võime

d. Domin Hiptage, Elaeagnus, Gnetum ula

bakteritel; üldjoontes vastavus 16S rRNA puule; eraldi replikaatide erinevus 2.5-6% (u sama, tiivesiseselt; liigisisene u 6-10%)

ondence analüüs

Moneses uniflora, Pyrola minor, P rotundifolia, Orthilia secunda arbutoidse mükoriisaga, sh P. Minoril sageli tug  
CWD: ECM 6 liiki; lagunemisklassid

Endogone flammicorona

Laccaria laccata, Hebeloma crustulinif, Rhizopogon rubescens parandavad taime kasvu, er Rhiz Kõigi kolme see  
Tuber sp. Endogone flammicorona, Rhizopogon sp: süntees. Rhizopogon kiirendab männi kasvu palju efektiivse

Pectelis susanna THAI assots Tulasnelladega. Kultuur + ITS

seentest toitumisel. Söövad kõiki esinemissag jr väikeste eranditega.

cast ja AUSSt

aks Cenoc, Cort, Clavulina, Heb, Inoc, Russ. 9/10 parimast sekventsi vastest tuli UNITEst.

tis; <6m: Rhizopogon spp., Russ. Nigricans, Pstom tristis; vanad puud: Cenoc, PsTom, Russ chloroides; Kokku metsas domin. Atheloid, Theleporoid,

:ape proge, juhised

us (sisald Rhodocybe) ja Entoloma monofileetilised; maasisesed VK tek 2 korda; EcM rühmadega maasisesed ei kattu; EcM rühm:

1 probleemid, eriteooriad, kohastumused, liigiteke,

Pleurotus ostreatus -Mn2+ moju mone 4st isosüümist transkriptide arv kasvab, monel langeb; eri MnP ja VP genide praimerid Pleurotus ostreatus

filised

, pH 9%, temp 9%; lehtedel ruum 52%, temp 15%, pH 5%. Juurte ja leheseente BD väga sarnane

41-D145

onserv sek str

'alif

is

1. P-vaese mulla N-väetamine suurendab mükoriisa mõju, sest taimed allokeerivad rohkem maa alla.

ng uute liikide leidmise eesmärgide segiajamine; puudulik liikideks jagamine a priori!; NJ puude kasutamine liikide eristamiseks p

Suillus luteus, S bovinus, Rhizopogon, Paxillus

Suillus spp, Thelephora, Laccaria, Scleroderma, Paxillus



s saprootroof: proteaasid, PPO, peroksu

Thelephora, Sullus bovinus

Lepista nuda

xxx

Suillus, Thelephora

Lepista nuda

Suillus luteus: välitingimustes metallitolerantsusvarieeruvus

nfg laia amplituudiga liike

itud 25-26 korda

ers, Hauppauge, NY.

1-148.

nde strateegiad

Hebeloma

kõdu lagunemine ja hüti

ga täpsem; sihtmärk rDNA ca 700 nu; probe: plasmiid+originaalorg DNA tükk ? Pikkusega. Plasmiid sisaldab normaliseerijana ka kanamütsiini geeni. 5 , cDNA analüüs, võrdlev genoomika. Spotitud vs sünteesitud ja klaas vs nailon-arrayd. Ülevaade

s u 90 MYA; Nothofaguse praegune levik pole ilmselt mandrite triivi tulemus vaid väljasuremiste, hiliste liigitekete ja LDD tulemu ülogeneesiks ja liikide eristamiseks ITS sobib, ent paljud lähedased liigid ja hübriidid pole eristatavad. Praimerid ITS6, ITS7, ITS8

im mood EcM siis kui on Männi või Nothofaguse lähedal, muidu mood AM.

ali tuvastamine erinevatel juhtudel ja eri evol küsimuste jaoks. Nullmudelid

Elaphomyces

nas esineb v palju ka konvergentsi. Eriti just saartel olevates metsades on puudus mõningatest funkts rühmadest, mida invasiivsed liigid võivad eriti kerg

ja hulk klavarioidseid liike

temaatika üle maailma

xillus, Gloeocantharellus: võrdlus ja hüpt fülogen seosed

2-4 korda Glomus intraradicesel

ca amööbide parasiidid. Mõnedel leidub ITS2. Aphelidea on varaseim seente rühm või seente sõsarrühm

ib kasutada juhul kui see on arusaadav ja vältimatu. Keskos lähenemine

õllul eri aastatel võib AMF kooslus suurel määral muutuda. Vb hoopis eraldusmeetodi efekt?

ammutavad ka lähtekivimitest mineraalseid toitaineid org-hapete eritamise; MHB abistavad murendamisel; www-d aitavad seer nte kooslus ja seeneliikide ensüümitoodang on väga erinevad A1 vs A2 horisondis ning Aprillis vs Jaanuaris. Seeneliigii eri ensüü : A-s)

gisigene var mõju on Laccaria bicolori kolonisatsioonile ja ens aktiivsusele suur, ent kumbki tunnus pole päritavad; mitte-EcM juu tel lakaasi aktiivsuse tipp kevadel -arvseotud N omastamisega; fosfataasi tipp talvel -arv P omastamine kodus, et kevadel kasvu jätkata; Cort anomalus eentel eri ensüümide aktiivsus. S. O sii sh

AM juurtel ja AM eostel; 15N ka sarnane. 13C phul on erinev understorey leaves vs MH leaves, mida tuleks omavahel võrrelda

Thelephora

Thelephora

Thelephora

Thelephora

. NH, USA.

myde konstrueerimine node'de kaupa

nektari puudumise labi, millest on korduvalt tek nektariga vormid. Petvatel gruppidel geneetiline diversiteet palju vaikum (inbreeding?)

v Phytol. 183: 980-992.

fossiile väga vähe

äreldab, et Pedicularisel on arktikas EcM (Stutz, Väre, Kohn&Stasovski) ja Alpi vöötmes AM. EcM leitud vel Vaccinium uliginos

Amanita pantherina, Inocybe lacera jt

Muuhulgas Populirhiza nigra (Tom) leitud vaid lagupuidus

el, nt kuiv vs sklerofüll

taceae tek vara-Paleogeenis. EcM gruppe ilmselt 3. Eukalüptidel võimaldas savanni kolida tänu võrsumise võime teke, mida pole v ise, Banksia, Gymnostoma, Podocarpaceae, Myrtaceae; 25-10 MAT sklerofüllitaimestik Myrtaceae, Casuarinaceae, Ericaceae; 5-2 MAT kõrbestumir ma, Podolobium, Mirbelia, Oxylobium, Otion, Callistachys) kuuluvad AUS endeemsesse Mirbeliaeae triibusesse imad on väga noored (v.a. Pinaceae) vrd Angiosp-ga. Pinaceae kroonirühmad harunesid 100 MYA m: ülevaade, null-mudelid, seda põhjustavad tegurid

misemiskeskused: SW Aus, Cairns, Brisbane-Sydney, Adelaide, Tasmaania. Cape Yorki floora palju sarnasem PNG teatud aladele kui muule Austraaliale

organismidel tulenevad kõrvalekalde molekulaarsetes identifitseerimismeetodites. Suure koopiaarvuga ruderaaliid amplifitseeritakse

eri meso- ja makrofauna eri meso- ja makrofauna Seente ja bakterite S

ja metsa vahel

ORM, kuuluvad ühte liiki

merkaptopetaanooli asendab polyvinylpyrrolidone. Korvaldab paremini igasugu polysahh ja fenoolod

nyctaginaceae, Coccoloba, Bistorta. Viimased on eriklaadides Polygonaceae suguk. (lähiperek Brunnichia, Eriogonum, Ruprechtia, Triplaris, Persicaria)

metastereerimine soodustavad humiinhapete kaasa tulemist (vrd kuulikestega lõhkumine); PVPP-columni etapp kasulik puhastamisel humiinhapetest; is puudel avalduvad ensüümid rohkem kui lisada varist; NM juurte aktiivsus ei muutu; EcM juurte 300-400x kõrgem fosfataasi aktiiv Suillus granulatus suudab täielikult puitu lagundada, eriti siis kui peremeespuu on 50% okastest vabastatud. Kõigi ensüümide aktiivsus ei muutunud

identsest ent fül kaugest krypt liigist või on sekveneeritud vale materjali

seenlillelistel: Pterospora andromedeae; Rhizopogon subcaeruleus grupp; Monotropa hypopitys; suilloidid; M

arbutoidse ja monotropoidse hüpoteetiline teke

id lagupuiduga

FEMS Microbiol. Ecol. 67: 411-420.

bist sai pärast sekveneerimist 68, millest 5 olid arv kimeerid.

ORM: Platanthera ja Coeloglossumi endofüüdid ja kultuurikirjeldused: Leptodontid; orhideedel: Armillaria, Ceratobasidium, Ceratorhiza, Epulorhiza, Marasmius, Melanoglyphus, Pseudoagaricus-sipelgas

rasiidiparasiidi koevolutsoon; väga sarnane 1121-1134.

amine toetudes lognormaalsele jaotusele, indiviidide arvule mullas ja mol tausturingutele, dominantsusele; arvukus väikeses ja laias skaalas: ookean: 10<sup>4</sup> viirus: AM taimedel virionide produktsioon märksa ki

Cenoc, Pilod, Tylosp.

Suillus

491-492

Suillus variegatus somatic incompatibility genetiite määramiseks

domin

olemasolu, praimerite selektiivsus

tharellus: vaid C. Cibarius, C. Formosus, C. Subalbidus

Morchella spp: puhaskultuuris ektendoMR õhukese mantli Morchella spp: puhaskultuur Morchella spp: puhaskultuur

riterid, konverterid vs lupjamine

4 liigi juuretupid

Cantharellus sp

Cantharellus cibarius

Sphaerosporella, Wilcoxina, Laccaria Pisolithus

domin

Tomentella 4 spp EcM süntees p Coltricia, Tomentella 4 spp., Amphinema, Phlebiella (Trechispora) vaga???: süntees kultuuri või

esmakordselt sümbiotroof

si aktiivsusele

Wilcoxina-ektendoMR mänd kultuuritunnused: jaotas klamüdosporide ornamentatsiooni ja monilioidsete klamüdosporide

Sphaerosporella brunnea

Sphaerosporella brunnea EcM sünt: Coltricia, Ba

mõned üksikud vähesel hulgal varajaste koloniseerijate hulgas

äramine indexfungorum taksonoomia ja mitme blast vaste põhjal. UNIX-põhine

samblad vs EcM seened: pms veget kasv ja surnud aineses samblad vs seened: eri intera samblad vs seened: eri i

maldest

sammaldel seened: s

girikkuse ja mol kella kiiruse vah otsest seost, mis võib olla kk energi efekt

Salix eraldunud Populusest 35 MAT (sõsarperek Idesia ja Poliothyrsis). Malphigiales sisald Elaeocarpust ja Medusagyne. Arv et Malphigialese radiatsio  
atit gradienti pole. Peremehe-spetsiifikat pole

ipterocarpeae hulka. Arv suguk pärineb Aafrikast. Sarcoleanaceae L-Aafr väljasurnud  
Tuber melanosporum

ni on parem kui miinimumini  
radient eri ökosüsteemides; ressursside heterogeensus

Laccaria bicolor

t peremehed Salix humboldtiana, Allophylus edulis?, Neea-Pisonia-Guapira, Coccoloba; veget-tüüpide kaupa. Koos eukalüptide, p

erminate definitsioonid

Quercirhiza cumulosa = Tomentella sp

Quercirhiza stellata = Tomentella sp

rase st seemed v arvukad viljakehade alt voetud proovidesse istutatud noortel puudel

hip: erinevad tulemused, haruldased liigid tuvastamata, vale-pos.

Dipodium hamiltonianum: seotud Gymnomyces ja Russula spp-ga AUSs. Teised lii

VIITED, ÜLEVAADE liikidest ja nendega seotud rühmadest. Rhizanthella garden

Hebeloma

00 liiki teada;

uumuse fertiilsus; EcM kolonis sõltus fertiilsusest ja konkurentsist, aga mitte varjutamisest. Kuuse EcM moodustamist stimuleeris ja männil inhibeeris k

tsiooniga ning epidermise rakud kollal; Pisolithus ja Scleroderma sobivad Allocasuarina ja Eucaly; Pisolithus ja Scleroderma sobivad Allocasuarina ja Et  
Mesophellia, Castorium: mükoriisad viljakehades ja mullas samasugused. Arv. Et viljakehas stimul juurte kasvu

cuse eri kasutamise saadakse erinev pilt bakterikooslustest mullas. Ükski pole täiuslik, kõik täiendavad teineteist

parema resolutsiooni kui ITS2. mõningal inkongruents ja arv. Hiljutine hübriid. ITS1s mikrosatelliidid. Lecc scabrumil suur liigisis ITS var. Arv. Ka L  
kongruentsed, ITS ei suuda hästi eristada liike. Vanad deletsioonid, mikrosatelliidid. ML, MP, Bayesi meetodid, statistikud lisaks. Leccinum v kitsa per  
jised, meetrikud, proge

Venezuelast 3 liiki Tomentelloide

Paurocotylis pila: as:

Paxillus involutus

us). Mol. Phyl. Evol. 57: 1276-1292.

imerite kombin-dega vaid 30% Agaricomycetes; palju pikki introneid. Pole nii eraldusvõimega kui ITS

kide määramiseks mullast.

:072.

biol 72:5069-72.

triksiite analüüs on analoogne ruumilisele distantile läbi PCNM vektorite; mudelisse jätta vaid olulised vektorid!

seotud seenele Boletus klaadis

esse. Mulla läbi liikus 10% doonoris fikseeritud C, millest 5.2% liikus otse läbi juurte, 4.1 läbi www ja 1.4% läbi mullalahuse. Soo  
rgesti eraldatavad ja sekveneeritavad  
l, lehetäidel ja peremeestaimedel: lehetäide fülogeneesil oluline mõju parasitoidede edukusele; lehetäide peremeestaimedel polnud pa  
Batrachochytrium, jpt

invasiivsed seened: ülevalaadatud; Phytophthora  
Armillaria 2 sp; vs patogeens Armillaria 2 sp; vs patog

Laccaria bicolor S238

ui muidu

id: praimerite ja restriktasid valik, ükski 2 restriktasid kombin pole täiuslik; erinevate sekv-masinat kasutamine, kiidavad oma R-keelel põhin TRAM  
esmasest koloniseerij

ga  
gi jaoks  
. Ecol. 48:926-934.  
LP bändide võrdlemiseks

h-2232.

Tomentella sp inokul püsib ja suureneb Tomentella sp  
Thelephora sp Thel, Sceroderma, Pisolithus  
Tomentella sp kolonis Afzeliat kiiremini Tomentella, Scleroderma

(Tuber); ITS regioonile; Peziza perek liigid polnud aligneeritavad (erin teistest uuringutest SSU ja LSU); liigisisene ITS varieeruvuus <1%, v.a. Terf lepr  
Lacc fraternata nakatab ka Cistaceae spp. Paljud kõdusaproovid on samuti kaasa tulnud. Tõestatud N-poolkera seeni eukalüptide istandustest ei leitud. . I

Suillus luteus Mycena galopus-suuren

iri keemiat, bioloogiat

atorliikide analüüs  
tüübid, definits ja seletus; lisaks võib mõjutada multikollinearsus; VIITED kliimavariaablite saamiseks; mudelid, mis arvet autokor  
vectorite valik ja interpret  
s fülogeneesivektoritele peakoord-analüüsi põhjal; eigenvektorite arvu valik broken-stick mudeli põhjal ja seletusvõime põhjal; vel  
vectorite põhjal fülo-signaali määramine; eri arvu eigenv abil optimaalse määramine  
ka mudelite valik AIC põhjal sõltub autokorrist;

orineeritud yhendite biodegr vama (ena x

Laccaria, Thelephora, Cenococcum, Pisolithus, Suillus  
Boletus spp, Suillus spp, Cantharellus cibarius, Amanita muscaria, Russula lepida, Scleroderma  
Suillus, Boletus, Cenoc EcM süntees

na PCAle ja CCAle: viited: ADE-4

Manage. 231: 226-233.  
ris mood AM

Tuber melanosporum

koost. Illustr

tr.); ka *Andromeda polifolia*, *Sorbus aucuparia*, *Juniperus communis* mood EcM  
sel.

Suillus bovinus, Paxillus

Stroph., Phanerochaete  
xxx

xxx

kt ka seeneliikidele: vs väetis; muld vs lehekõdu. BD mullas ei muutu, ent kõdus väetamisega väheneb; liigirikkus väheneb mõlemal juhul  
ühised Euroopa kaudu üle Atlandi ookeani

ühaks. SEA algkohaks ka Eur suhtes. Vrd loomadega, (sanmartin,2001), millel pms disjunks SEAasia-Eur ja NE Am-NW Am. Seega arv et taimed levi

: arvestamine parandab K.L. SACI põhjustab ka olulise muutuja mittearvestamine, uurija suva. SAC eiramine põhj vaesid param n  
latsioon: kriteerium Morani I; eri meetodite võrdlus; Bayes vs tavaline; proged, soovit standardis ridade kaupa; Ruumilise autok  
liigirikkuse lokaalsetel andmetel tekitab kohalikul tasandil toimuvate protsesside eiramine; ka uurijad võivad tugevasti autokorr tek

Rhizopogon, Hebeloma

Rhizopogon, Hebeloma

Rhizopogon vinicolor, Laccaria laccata, Hebeloma crustulinif. Rhiz stimul taime fotosünteesi. Heb ja Rhiz suure

odi Kapimaale Mauritiusest, kuhu viidi Austraaliast 1800. Zimbabwe 1890ks aastateks. Maailmas katsid istandused 1990ndatel

sonia sõsartakson on Pisoniella, ja kõige nende sõsarühm on Bougainvillea+Belemia+Phaeoptilum. Pisoniee tekketsenter on L-Am, kust on levinud troo

tegemine. Efektive, kiire, ökonoomne, vajab vähe, ent puhas DNAd. AFLP>hübriidismikrosat-probedega>duplekside erald>kloneerimine>sekv  
on: , mt SSU: kongruentsed tulemused. Intron tekkinud ühel korral. Arv Cenoc => 3 tugevalt toetatud liiki, millel arv eri füsiol omadused; eri liigid sam

Tylospora, Paxillus

Clitocybe nebularis nõia

uurus; 4 väiksem ala ulatus; 5 keha mass; 6 väiksemad laiuskraadid. Liigirikkus suureneb pindala kasvades eriti troopikas. Tugeva

andatud arvutamine R's (SpaceMaker)

mis ülejäänud, originaaligote jrk

kvantitatiivne mõõtmine; Paxillus tooda

Paxillus involutus

Armillaria

Armillaria

Fusarium

d on v keerulises assotsiatsioonis AM-seentega. Diferentseerunud koed ja tugev AM-hüüfide mass

Pisolithus sp (ei paranda Acacia kasvu Madagaskaril 19 kuu jooksul)

üüsi järgi Pakaraima on lähedasem hoopis Cistaceae-le, Monotes ja Am Pseudomonotes mood ühise klaadi

ia kaevanduspinnasel koos eri peremeestaimedega(Acacia, Casuarina, Nothofagus)

šarsuguk on Physenaceae, samuti Madagaskari endeem

negali istandustes domin AM; tihti EcM ja AM valistavad teineteist

New Phytol. ???

Suillus bovinus

Monotropa MR ultrastr, termin 'Monotropoid MR'

Suillus grevillei

Suillus grevillei

taimsete fenoolide teke, lignifikatsioon, taime-ja seen

liikide mõõtmine: TWINSpan oma puudustega, uus ja plastilisem IndVal

Arbutusel ektendoMR, sh tuberkuloidne tüüp

rr ja selle põhjal pH mõj AM-seenekooslusi palju enam kui taimeliik. Levimine piirab seeni väga vähe

Boletus pinophilus, Gautieria othii, Hebeloma longicaudum, Russula sanguinea, Scleroderma polyrhizum, Trich

Leccinum, Pisolithus, Scleroderma  
 ), BD näitajate modelleerimine, proovisuurus, kogu liigirikkus, võrdlus, usalduspiirid, VIITED  
 Cantharellus formosus  
 Laccaria bicolor  
 55. metsamajanduse mõju: p  
 Hebeloma, Laccaria  
 Cenococcum, Laccaria, Suillus, Rhizopogon  
 nin ainult variaablitele, sellest ülesaamise transformatsioonid; heterogeensuse mõõtmisviisid, eksperimendi disain mis võtab arvesse heterogeensust  
 oimalused: blokistamine, nested analüüs, plottide summeerimine kui pole ploti efekti, heterogeensuse enda analüüs  
 oksalaadi roll: metallide inak oksalaadi roll: metallide  
 idaniku seened ja EcM seened on genoomika põhjal kaotanud suure osa lignotselluloosi lagundavatest ensüümidest ja oksidoreduk  
 xxx  
 Lactarius  
 Tylospora  
 rimine, S-Libshuff, DPCoA, DOTUR. Sekv 13355 bakteri sekvensi  
 p P-Am sect Abaso 58 MAT; sect Tacamahaca ja Populus on palju hilisemad, 15-20 MA vanad  
 strile T-RFLP seente SSUle 2  
 ookeanisetted: eukar  
 Fomitopsis rosea ja Phle  
 leviku uurimine välja pa  
 rinevaid seeni ei suudeta eristada. Samas mitmel pool ka arvestatav liigisisene varieeruvus. Määrangud kahtlased.  
 miseks. Vaja mitmeid ensüüme ja ka siis raske eristada grupe, missarnasemad kui 90 -95%. RFLP sama täpsuse juure pole oluliselt parem. Liigisisene  
 Agaricus: noiringid vt s  
 vs AM  
 nnasel pigem kuusega ja ei mood klamüdosp, W mikolae pigem männiga ja mood klamüdospoore ja häiringutel-põlengutel, arv nende vaheline hübriid V  
 neetiline uniformus???, vertikaalne ülekanne, parasitide rohkus, suured genetid???, filtreerimine ECM sümbioos kui vastastikune parasitism ja eksplu  
 Sphaerosporella tuleaseme-kottseente bio  
 Pezizales vs seemnete idanev Pezizales vs seemnete id  
 l kottseened: amüloosi, amülopektiini, pektiini, ksülaani lagundamine. Peroksüdaasid kõigil; türosinaasid, lakkasid varieeruvad l pürofiilsed kottseened: a  
 identifitseerimisel  
 arina  
 Pezizales: arv esineb tugev kontinuum saproobidega, sest paljudel saproobsed omadused: tsellulaasid, polüfenool  
 ab, N ja pH väheneb, mikroelementide leostumine suurem  
 las rikastatud tselluloosi lagundajatele. 12C domin kandseened; 13C domin pioneersed kottseened. Arv. Mullaproovi eraldamisega  
 a Gröönimaa kaudu Skandinaaviasse. Siberis refuugium  
 l. Geneetiline diversiteet suurim Beringias er. RUS poolel, Kaukaasias ja pisut ka Alpides; Geneetiliselt eripärased olid Alpid ja  
 odelling: Ainult bottom-up efektid, aga mitte vastupidi toiduahelas; Taimede BD mõju oli tugevam kui N või CO2 tõusu mõju. Te  
 ka vaid tühise osa. Mehhanism ebaselg  
 Scleroderma  
 Paxillus  
 oba, Tiliaceae?  
 Paxillus involutus  
 Piloderma  
 10..1000 korda  
 nensionaalsus ehk kui paljude tunnustega saab võrgustikku küllastunult kirjeldada  
 pürofiilsed kottseened: l

Pyronema domesticum:

probed 16S piirkonnale (erinevalt mittemärklauast väh 2 bp valepaardumine 3'otsas): universaalsed, rühmaspets, redundantsed, replikatsioonid array pii  
nitus indiviidile

0) jt

ab Neurosporal temperatuuriadaptatsiooni võtme

2tuumaline Ceratobasidium põhjustab mändide surma

õjumi mattides laguneb okkakõdu kiiren Hysterangium (matid)  
ita rühmi, kust vaid molekulaarsed 18S andmed, eriti ookeanides; eriti fülotüübirikkad on arktilised veed ja kuumaveevendid  
:s toimjate seemnete tekkete, sest need ei toida end ise ara;

pink

Piloderma, pink

Piloderma, pink, Paxillus

urist -ei mingit erinevust liigisiselt; E

Tylospora fibrillosa

domin

Piloderma, Tomentellopsis

Piloderma, Tomentellopsis

Tomentellopsis, Piloderma ja Paxillus on võimelised kasvama läbi mittesteriilse metsaahuumuse ja nakatama män

iseloostus

tomentelloidid

tomentelloidid

ntratsioonides; puju muld koos varisega takistas palju  
tele

n Pseudocydonia jt õunviljalised  
unemine Terfezia viljakehadesse (ornitiini aktiivsus), nitraadi reduktiivse suurem aktiivsus hütüfides

äranguid Clelandilt. Õigeid Cantharellusesse kuuluvaid liike vaid 2-3

roll

di index: näitab summarset BD; ei arvesta proovide hulka

d, erioorganismid; erigeelid; klooni-rmtk-d ei saa kasut kvantitat hinnanguks  
l min-toitumises

Endogone viljub itaalias ebatsuga ja männi 2-3 a istandikes. V sage. Lehise all puudub. Mood mükoriisat, kus v

Tuber maculatum esmane süntees Pinus strobusega. Eriti vermikuliidilisaga pinnasel parem taim  
Gnetum africanum mood EcM Scleroderma sp-ga

uumorpiirkonnas

≥ järjestused

erika liigid pms

nellide kui ka roosteseente hulgas. Ülevaade

l.

õtmine, max aktiivsus 7-9päeval; lakaasil alates 5 päevast lõpuni (-14)

Cenococcum esmakirjeldused

Panus tigrinus

lus läbi ajaloo. Peetud fossiilideks. Esmakordselt mainib seotust mükoriisete struktuuridega

tus=>Eremiomyces ech. (peremees teadmata) ja Terfezia pfeilii =Kalaharituber pfeilii (peremees Acacia ja Citrullus vulgaris??). ITS ja LSU järgi. Mu

bleemid mõõtmisega, segavad faktorid -vaba Mn, aromaatsed ühendid

el aladel. Väiksemad mõjurid keskkonna heterogeensus ja ajaloolised faktorid

vs parasiidid, ECM seened: 1 vs parasiidid, ECM seer

ea, Fungi, and Viruses in Soil. Appl. Environ. Microbiol. 73: 7059-7066.  
õhised

girikust enim pH (unimodaalne Ph7 juures)

ljal.Ka väike sekventsidi arv on metagenoomi puhul määrav  
alam kui metsades ja rohumaadel

sti ennustatav

amets ja temp okasmets; mikroobide osakaal suurim kõrbealadel; seente/bakterite suhe suurim temp leht- ja okasmetsades, madala

mikroobide levik sügav

Monte Carlo test (Singelton,2001)  
e vrd algse DNA kogusega

bakterid, seened, 18S (s

datud tuule ja veega leviku tõttu ning aeglaste liigitekkeprots tõttu. Glob leviku piiriks on org suurus 1 mm

Paxillus, Suillus bovinus, Pisolithus, Rhizopogon  
Suillus, Pisolithus  
Suillus spp.  
Suillus spp.

lehis vs mänd: Suillus spp. 32P ja 14C ülekanne. Mär

kud hilistekkesed, monofüleet

Laccaria amethystina, Xerocomus chrysenteron, X. pruinus

v baasil: erinevused eraldamises, koopia arvus, vitaalsuses. Jämedamaid juuri diskrimineeriti

e stabiilsus: Erikoidne ja orhidee MR ning noodulitega küllalt stabiilne -ühes-kahes taimerühmas; ECM labiilne. Arv süsiniku hinna tõttu N2 fikseerivad

sesside hindamine tipu-kamm-fülogeneesi põhjal. Bayesi proge BISSE

b paremaid tulemusi inhibiitorite eemaldamisel, samas DNA kogus väheneb

itiübid. Pakutakse välja ka minevikus dominantpuid. Merede kerkest ja taandumisest ülevaade

ärin kandseente eellaselt; roostetel ja nõgiseentel kadunud; VP, MnP, LiP geenide areng ja taandareng eri rühmades; permis ja kar  
on v paljulubav ja soovit. Selle baasil luua mikrokiibid liikide määramiseks

sed netw;

Cladosporidium ja Aure

Elaphomyces muricatus, Genea klotzschii, Rhiz rubescens, Hymenogaster tener, Hysterangium, Cenoc, Tuber al  
Tuber brumale sünt Pinus nigral -cys olemas  
Stephensia bombycina EI MOOD EcM tammega ega polnud ka biotroofne Stephensia bombyci

oniide

30 MAT tagasi; vanimad fossiilid pärit u 90 MAT; mitmed väljasurnud perek Coryluse, Carpinuse ja Alnuse sugulased. Perek. Lepp -Alnus tek 100-112  
t, varjuna, kütteks ja ehituspuiduks. Kuivatavad maapinda ja stimul põlenguid

Terfezia arenaria, clavaryi, Tirmania pinoyi sünt Helianthemumil. Taimekasv ja EcM vs rakusis



*Amanita rubescens* sünt männi hüpokottüüli juurtega puhaskult  
n modifitseeritud fixed model, probabilistlik mudel tõstab I vea tõenäosust;

*Pisolithus alba*

idanesid ka sama hasti mullas, mida oli hoitud 6 kuud 18 kraadi juures

Mükoriisatüüpide esmakirjedused: AM, ErM, OrM, Monotropoid ja E

Abies); miskipärast ei leitud lehisel, kas ektomükoriisa mõiste, EcM esinevus Fagaceae, Salicaceae ja Pinaceae liikidel (miskipärast ei leitud lehisel, kase

*Mycena galopus* vs *Mars*  
suktsessioon varisel ja li

rthwest and Range Experiment Station Forest Service, U.S. Department of Agriculture, Portland, Ore, pp. 85-98.

töötab paremini (täpsem, madalam type I error) kui phyl eigenvector PVR  
urimine tingimustes, kus liikide fülogeneesi ja areaali on samaaegselt arvesse võetud  
mistuskivid: madala R2-mudelite usaldamine suure valimi ja log-skaala korral; samaaegne raporteerimine fülogeneesi arvesse võtv  
leae ja Cypridoideae on basaalsed harud  
jal perek eristamine: Pyrola, Orthilia, Monotes, Chimaphila: ITS: Monotes Chimaphila sees  
omaette grupis; Orthilia on sõsarrühm Pyrolale. Lehtedeta vormid on väga lähedased P. Chloranthale; Chimaphilat peetakse primitiivseks

*Hebeloma crustuliniforme*

*Laccaria bicolor*

lisest liigist. Sh. *Laccata* koosn 2 krüpt liigist.

*Hebeloma mesophaeum*

*Suillus luteus*, *S. Granulatus*, *Scleroderma aurantium*, *Tricholoma pessundatum*

mitmed

Rootsis 4 bioloogiliseks krüpt liigiks monokaartionide intersteriilsuse põhjal

ogeograafia: Chloranthaceae, Fagales. Eellaste otsingud, divergeerumine, välja suremine  
itidus mood vaid EcM. Ei illustr.

erühm Lyophyllumi kõrval: termiidiseend tekkinud 1 korra ja tagasievol pole; eri klaadid paiknesid tavaliselt eraldi kas Aasias v Aafr  
PB1>RPB2>ITS. RPB2 oma pikkuse kohta parim. Praimerid

Julbernardial. Arv EcM-1 v oluline roll. Põletamise intervall määrab koosluse tüübi

õbidel. Metsamullas on mõlemad head indikaatorid. AM jaoks töötab 16:1w5 hästi juurtes, ent kehvasti mullas. Mulla jaoks parer  
i vihmausside

esimene üritus EcM sünteesida, ent ebaõnnestus (*Lact deliciosus*, *Sarcodon* *Collybia macrorurus*)

na abortivum il

IGS-RFLP: *Armillaria Jaapanis*; eri *Armillaria* sp par

identifitseerimiseks oligote kombinatsioonid, u 3 tk. V täpne. Protokoll antud; Ka chaperon-probe

nilised meetodid andsid 3x paremaid tulemusi kui CTAB-pohinevad lüüsimetodid; huumusainete probleem

lehekõdu lagundamine j;

**Paxillus involutus**: terve rida isolaate ei mood haavaga EcM, tekitades paksenenud rakuseinad

**Hebeloma, Laccaria**

Kõdus Pinus, Populu

ks: Shoreae (Diptrocarpus (Vateriopsis (Stemonoporus-Vatica-Vateria) services are found in forests with more tree species. Nature Commun. 4: 1340.

414.  
e Mantel maatriksi põhjal

**Paxillus**  
**Laccaria bicolor**

**Heterobasidion annosum** on suuteline nakatama ja ka:

**Pisolithus**

: kasutamishuhud. Selle parandused, püüded hinnata statistiliste seast tõelisi nullhüpoteese, alternatiivsed viisid alfa korrektsiooniks: false discovery rate

arnane

**Tuber melanosporum**, **Tuber indicum** ja **pseudoexcavatum** on EcM morf poolset v sarnased ja ka

x

troopilised veeseened

teentel evol jooksul mitmeid kordi

al neid kokku >250

enialised on tek heledaeoselistest õhukeseseinalistest mitmeid kordi. Tricholomataceae ja Entolomataceae on läh seorud; Cortinariuse sõsarperek on Pha

nanita 4; Descolea 1; Cort 41, He (**Austropaxillus stauus**), Pax inv, Cenoc mood EcM Nothofagustel; P. statuum ei mood EcM Eu

optimum. Hüpot et EcM võivad põhj tsesalp monodomin madala P aladel  
a talitlesid omamoodi.

**Hebeloma cylindosporum**

lletotrichum, Trichoderma harzianum complex). ITS jaoks peaks kasutama 99-100% barcoding threshold

**orhideed** saavad seente kaudu kuni 85% C ja 80% N; eristuvad selgesti autotroofse

x

x

**AM-seente mõju patogeene**dele võib olla pos,

EcM eelistuses.

BD sõltuvus pinnasest

ecanoroM. Pseudotulostoma lähim Trichocoma; kõik kuuluvad Eurotiales seltsi

:

lbard based on soil and sporocarp DNA. J. Biogeogr. 34: 74-88.

õi kliimavõõtmetes. Neist 3 eranditult Santa Cruz'i saartelt. Peab 8ks iseseisvaks füloliigiks. Suurimad linidid polnud b-tubuliini j

phatase aktiivsus sesoonselt **Lactarius blennius, L. subdulcis**

a, Laccaria omavad vedelkultuuris väg: **Thelephora, Laccaria, Lactarius**, Paxillus, Cenococcum, Suillus, Rhizopogon

kaugus; log-suhe

väga pikk, sisald mitmeid kordusi. Eri ITS koopiad võivad olla üsna erinevad, olemas tervel subseksioonil. Ka teistel Pinaceae liikidel pikad ITS1d.

endas Thelebolaceae ja Rhytismatales (selle sõsargrupp on Cudonia+Spathularia)

ide transkriptsiooni mõõtmine Northern blotiga: MnP, H2O2, kuumashokk indutseerivad; N inhibeerib

**Phanerochaete**

a erineva morfoloogiaga seened. EcM teke korreleerub mullapealse eluviisile üleminekuga (basaalne puidul)

vähem kevadel

ma: antibiootikumid

**Heterobasidion vs Trichoderma**-oluline roll antibiooti

**Heterobasidion**

**late stage vs early stage**

seks -kasutus parasitismi ja sümbioosi uurimiseks

**peremeesting enamasti** perek (66%) ja sugul

phensia taksonoomia

**Tricholoma matsutake**

haruldusi. EcM taimedest Pisonia aculeata, Acacia spirorbis

Vaatluse alla võeti puu harupikkused lähi-liigipaaridel

**Tuber macrosporum** sünt Corylus ja Quercus spp. Cys asemel imelikult harun EmH

**Tuber spp.**

**Tuber albidum, brumale, aestivum, rufum** parandasid Cistus incanuse kasvu. Tuber melanosporum eri Cistaceae

63.

mycorrhizal Russulaceae. Mol. Ecol. 15: 491-504.

svusi aastaajati ega eri pestitsiidide kasutamisega

-päritolu; põhjalik diskuss Araukaaria, Agathise ja Wollemia bioge üle

**niiduorhideed Ophrys fuciflora, Anacamptis laxiflora, Orchis purpurea**

**ORM: Limodorum abortivum ja Limodorum spp. Assotseerunud Russula spp-ga, er**

**bakterid, seemed, AM-se**

seost

reeritud, Sebacina vermifera: mitteperfor parenthesoom

erunud, ent mtLSU annab hoopis paremaid tulemusi. Paljudel seentel suure liigisisene varieeruvus

kiirusega eriliikidel

ri-lähigruppides

sferaas: seenel alati aktiivne

**Rhizopogon luteolus**

tne eri thresholdidega multivar analüüs kooslustele: dominandid ja haruldased liigid käituvad eraldi, ent üldiselt thresholdi mõju kc

anika ei koosne mitte niivõrd ligniinijääkidest, kui mükoriisete seente hüüfjääkidest, mis ei lagune.

oos rakusise kolonisatsiooniga. **Alpo** **Hebeloma, Cort, Tricholoma, Scleroderma, Pisol, Pax, Laccaria, Amanita, Leccinum, Lact, Thel, Cenoc**, süntees

**Laccaria bicolor**

mine ja klasterdamine liikideks. Eri klasterdusmeetodid; puupõhine ei sobi; Peronospora puhul oluline ökoloogiline + geneetiline i  
kud - neighbor-net - kui mitu alleeli v kloonid; delta väärtused ja treelikeness põhjal; Optsil

aised mullad, suur topograafiline ja kliimaatiline varieeruvus. Fossiilidena sh Casuarinaceae ja Sarcocaulaceae  
**fütopatogeenide kaasaegseimad** uurimismeetodid: üle

spluateerijatel > muudel; spetsialistide seas oli see rohkem evol konserveerunud.

vvara; eri patogeenerühmad reageerisid keskkonnale erinevalt; Ei võtnud arvesse ruu **patogeenide ruumiline levik** mullas neighbor

**Phlebopus tropicus mood** Cistus spp juurte ümber **Phlebopus tropicus mood** **Phlebopus tropicus r**

tituumused Thanatephurus Rhizoctonia anamorfidega . Thanatephoruse sees paikneb mitu rühma ku **2-tuumalised Ceratobasidium** ja multituumused Thanat

hephorus paljutuumalised vormid on tek 2-tuumalise saproobse Ceratobasidiumi sees palju kordi iseseisvalt. Indelide kodeerimine annab v head tulemus

**Lactarius deliciosus, L. Sanguifluus, Pisolithus, Rhizopogon, Suillus spp.**

erved mudel (kumulatiivne tüüpide arv)

CWD: Piloderma

CWD: ECM palju liike; madal pH ja N, kõrge C...

Suillus, Laccaria

ala baasil, teisendused; liigirikkus/pindala = liikide tihedus. Kasutamisevõimalused ja paljud vead. Soovit individide baasil proove koguda. Üld-liigirikku-  
jonidel põhinevate statistikute leidmine: ANOVA, Chi Square, Macroecology, Niche Breadth, Co-occurrence, Guild structure jms.  
iis: sobivaim C-score ja nullmudelitest sellised, mille ridade (liikide) sageduse summa konstantne

udes eripikkusega DGGE bandides

s 0.19 V. Suur kõikumine. Tuleb arvestada ka häiringutega. Kõik uuritud alad külmemad kui Eestis  
models, path anal; ülevaade, mõisted, latentsed var

Entoloma alpicola

agunenud puiduga ja samas mändide m [Hymenochaetales N-Carolin](#)s: Coltriciella dependens levinud kõdutuvedes ja nende all, alati koos EcM juurtega

pole arvestatud dispersiooni. Lahknemiste arvutamisel alati kasutada mfg kalibreerimispunkte koos dispersiooniga, mida ka edaspidi arvestada

eit, st valditakse krüpt liikide teemat; Mitmetel mikroobidel keskmises skaalas oluline distants, mitte niivord keskk heterogeensus (mulla tuup vms). Tul

li test

kottseente BD ITS1 pik

s, Sargasso meres ja vaalaraiabetes on erinevad

eid liike

Hygrocybe, Clavulina, C Hygrocybe, Clavulin  
saproobide (Polyporus, Pleu saproobide (Polyporus,

Bi kasutatav meetod

Gaultiera, Hysterangium matid

)-D704

GI-I: Mycocosm

viirus: Agaricus bisporus M\ Agaricus bisporus

subdom: T. sublilacina

ctonia spp. Biotiiniga seotud oligonukleotiidid head PCR amplifitseeritud DNAlle, kogu DNAlle mitte; ca 120 nu oligod töötasid üsna hästi genoomsel D

Suillus granulatus, Pisolithus, Cenoc

Boletinellus merulioides ei mood EcM männiga, ent muudab viimase juure Boletinellus merulio

sd liigid;

itüp1) populatsioonigeneetika uurimiseks. Phialocephalal kõrge polümorfism (Nei indeks), tüüp1-1 madalam. Samad RFLP-probed ei andnud tulemusi tei  
i puhul. ITS ei andnud head tulemust

a applanata kompleks: Stoyke 1992 ja Zijlstra 2005 isolaadid ei kuulu sinna rühma; ekslikult peetakse EcM taksoniteks; kritiseeriv  
emel  
ond

Tuber Aestivum

CZ assots v paljude AM-taimede juurtega, eriti Fraxinusel, vähem Ulmusel ja Taraxacumil; Arv

Entoloma clypeatum - suudab kasutada väga p

viron. Microbiol. 8: 773-786.

Hebeloma cylindrosporium

Chatothyriom basaalsed harud on kivis elavad. Lihheniseerumine on selkundaarne ja polüfüleet arv.

pacers-selected isolate of L. deliciosus.

Lactarius deliciosus

Matsutake

ndi

Lactarius deliciosus

Tricholoma matsutake stimu Pinus densifolia kasvu

ss 2: 37-44.

gko((Araucaria+Taxus)Gnetales(Pinaceae))))). Gnetum pole Gnetales hulgas basaalne

Tricholoma matsutake  
Matsutake

Hebeloma cylindrosporium

Hebeloma

Hebeloma cylindrosporium

test: kõrgendatud tüüp I viga ja madal võimsus

õsed läbi moodulite liitmise; super-generalistid stabiils mutualismi ja soodust BD ja komplementaarsust ning konvergenti;  
stetness ja asümmeetria sõltuvad pms võrgustiku suurusest m x n; mutualistidel ja antagonistidel sarnased muustrid kui netw suurustum. Liikidel eri-levikustrateegiad: moned tyve lähedal, teised eemal

ML ja bootstrap kiireks analüüsiks

Hypocreales domineeriv

suvel-sügisel (madalam). EcM mediaaneluiga ca 200 päeva, max 1000 p

umetsast seot VÄIDET Gomidesia spectabilisega

nev mikroarray; 8-20 bp immobilis oligod: 20 bp kõrgeim signaal, veidi madalam valepaardumiste tuvastaja -parim neist)

rRNAga; oligoprobod; 2 märgitud sihtmärk-ahelat (teine kontrolliks); arvavad, et teoreetiliselt pole vaja nu-happeid amplifitseerida; soovivad kogu arr;

Saprootroofide biotehnol

Terfezia, Picoa

vik Kanaaridele üks kord. Fossilid miotseenist 23 MAT

rikas. S. Bermudense ja S. Stellatum assots Coccolobaga laiadela aladel, Veligaster nitidum kasvab koos Pisonia subcordataga Neitsisaartel

õtmine, max aktiivsus 7-9päeval; eriti peale Glc ära tarbimist ja aeroobsetes tingimustes

Pleurotus ostreatus

õjal perek eristamine: Pyrola, Orthilia, Monotes, Chimaphila: erinev kromosoomide arv, jms

ol. 15: 1853-1869.

Hebeloma 26 spp männil. Sh H. Radicosum. Paljud pajude-liigid ei mood männiga EcM -ARV s  
Amanita spp, Boletus bicolor, Suillus, Rhizopogon sünt männil  
Chlorophyllum rhacodes, Suillus variegatus, Rhizopogon roseolus -süntees vermikuliidil (terra-li

maatiline ja väga ebatõpne, ei sõltu modelleeritud haruldaste liikide tegelikust arvust

d eraldi

Piloderma võimalikud saprootroofsed omadused

Piloderma võimalikud s

sa Ramariad

um jt Phallaleste morfotaksonoomia cys ja RM baasil.

eenid

lingut tuleb rakendada koos muu ökol analüüsiga. Hea krüpt liikide tuvastamiseks

paar kryptilist liiki

Tuber, Boletus edulis, Tricholoma matsutake: kultiveerimine, VIITED

Lepa EcM seemned: ülevaade

ECM vs Otiorhyncus (Coleoptera)

I kanda kinnitada

NE USA segametsadest

st. Bot. 25: 418-431.

eostevihm monokartloot

illeg eri järjestus

võimsam

perekond, mis hõlmab Vralstadi liike. Sisald.Rhizosc. Ericae = erikoid MR; M. Vraolstadii = EcM; Cadophora finlandia = EcM, M. Bicolorata = Piceu

Suillus grevillei sünt lehisel

Mehhikost Panamani 500-2400m a s l, taksonoomia

e lähim perek on paju.

iversity loss for litter decomposition across biomes. Nature 509: 218-221.

seened transpordivad

s. Plant Cell Environ. 16: 375-382.

Suillus bovinus

ed põhj suuremat BD, mitte aga lehe liigirikkus per se  
rdistub, tüüseb temp keskm 4\*. Ookeanitase võib tõusta 5-10 m arv Pleistotseeni max; 10-15 m arv. Eutseeni max.  
viljakehadega läbisegi. LSU Evolutsioon kiirem maaiseste VK rühmades. Rühmade iseloomustus, ökoloogia  
riieruv, teine mitte. Var liikidel üld ei esine geogr või substraadimustrit. Peziza varial siiski kerge on. 13 liiki kokku  
viljakehadega läbisegi. 3 geeni. Enam-vähem konkordantne

kooslused erinevad e

t  
nev klasterdamine  
d  
ringaldasiin

oksüdaas

t.org/.

Chloridium paucisporum (Wilcoxi isolaat) on sama RE-mustriga ja arv et tegu on ikkagi ühe liigiga  
outgroup; A) Pezizaceae-basaalne; B)Morchellaceae (Tuberaceae-Helvellaceae); C)Sarcosomataceae(Pyronemataceae-Sarcoscyphaceae)  
ridgesia  
ood EcM ainsa EcM taime Dryasega; VK seevastu arvukalt (???)

teerimine, soovit vigaseid asju mitte geenipanka panna, mõlemat ahelat pidi sekveneerida, kontrollida DNA sekundaarstruktuuri jr

Paxillus

oonid HMM põhjal. Prokariotidel (V1-V2; V6) ja seentel (V4, V7) on variabiilsed regioonid erinevad

mulla bakterid, arhe

CWD: ECM juuretippude suur arvukus eriti juulis; suur veesisaldus

CWD: orgaanika on oluline ECM jaoks kuival aastaajal, niiskel mitte

si aktiivsus mädanevates eluspuudes: eriseened eri puudel erinevalt; mõjutab pos niiskus, temp

nitrogenaasi aktiivsus m

CWD: ECM suurem levik istandikes vrd mineraal-ja orgaanilise mullaga

MnP, LiP, Lakaasid, tei

kriitika varasemate tööde aadressil, kes ütivad mütseeli viljakehadest EcMini vedada või misir  
Lactarius deliciosus, chrysorheus, Amanita muscaria, Gyroporus castaneus, Suillus bovinus, lute  
Mycelium radicis nigrostrigosum = Cenococcum geophilum: obs Pinaceae (6 perek), Quercus, F

aseened saaks kätte toitained suht paremini

ütte nishihõive. Seeni võivad neg mõj teatud kõdu tanniinid; arv N liikumine kergesti lagunevast rasketilagunevasse pole tähtis; M

xxx

! tuvastati SEM järgi

Neal ja Guapiral

i mõjuta faktoreid ja nende tähtsust uurides kontinentaalseid liigirikkumustreid

ugi kui vaadata vaid peremeestaimi. Mõlemaid mõj samad keskk faktorid - eelkõige max AET ja kõrguste vahe

n, peremehe-spetsiifika, uued liigid ekspeditsioonidelt jms. Arv 5.1 miljonit, siiski jäävad 1.5 miljoni juurde

nõõtes konkurents stressiga väheneb

)-290 node age); Pinus tek 126 MYA, kroon 89 MYA; arvatavasti radieerus ja oli edukas tänu põlengutele, millele kohustus

nii Frankia kui ECM, siis transp toimub pms Casuarinasse hoolimata sellest kumba taime on N väetatud. NO3 ja NH4 efekt sama

tal on suurem N vajadus

Pisolithus

41.

); saarte biogeo on paljuski sõltub varem olnud vulk saartest, millelt on saadud asukad. Arv et organismid on liigirikkad aladel kus nad on tekkinud. Pan

tsenter Brassosporale kuna seal on preagu enim liike

oos. Mägede taimed on arv radieerunud ja spetsialiseerunud tänu maapinna kiirele tõusule. Taimestiku nimekiri: pot EcM ja indig Gnetum, Goodyera, C

g, et määrata diversiteedi jm efektid produktiivsusele ja suremusele

viljakehadega, phyl /peziza depressa kõrval, ent puudub bootstrap support

eiziales. Mol. Ecol. 22: 1717–1732.

); liblikate liigisisene COI var väga väike

iblikatel; seal kus ei tööta, on osaliselt süüdi krüptilised liigid

innuliike N-AM. Leiti 4 uut liiki; ei sõltu geogr kaugusest

ot sekventsi järgi 1.55 GAT; kandseened vs kottseened 1.2 GAT, sisemise kalbiratsiooni järgi väh 0.75-1.1 GAT

ltu krüpt liigist ega kultiveerimise ajast. Tõenävalt isolaadid looduses teisiti

rüptilisest liigist, mis eristuvad 6 geeni põhjal. Mõnedel on erinev ökoloogia (nt pargi lehtpuud), teiste kohta raske öelda. Vastavad

.tid. Arv. Tulenes täpselt maakasutusest enne. Umbrohte eelnevalt ei hävitatud, vaid külvati taimed peale

Laccaria bicolor

Th terr domin

t.

lai kooselu skaala

konkurentsi tõttu väljasuremine: mudelitepõhine

; BD: lähtekooslus>neelukooslus>jäänukkooslus; liigifond suurim vaid lähtekooslustes

iktuari sõltuvus erinevatest faktoritest: eristavad konkurentsi mõju fül sarn-funkts mõjust. Algoritmid

lamine: Aspergillus, Candida. Spets probed 20 nu rDNA ITS. Täpne protokoll; diskussioon kontsentratsioonide spetsiifiliseks muutvate reagentide üle. l

lagupuidul ja tüvedel, ent arv EcM sest vaid Dicymbe metsas. Arv efektiivsem eostega levik puidult, sest VK ei pea tungima läbi kõdu

õsar perek, levinud Jaapanis ja Guyanas, mood EcM

% >10cm dbh tüvedest. Mullaandmed ei seletanud Dicymbe vs liigirikka metsa olemasolu. Dicymbe mets väga püsiv, sest kõik vanusejärgud domin.

nerid.

kuni 2500 bp loigud LSU

Laccaria spp.  
Laccaria

erek mitmes lähedases Amhersteae kladis. Sõsarperek veel Aphanocalyx, Bikinia, Icuuria, Didelotia, Pellegriniodendron, Englerodendron, Polystemona

org-rikkam ja kleepus rohkem juurtele külge; juured peenemad

Piloderma

Paxillus

d liikidel mitmeid refuugiume Eur, Aasias, Ameerikas. Pms geneetilised piirid mitmetel liikidel jooksevad 1) läbi Skandinaavia ps., 2) Uural-Obi j; 3) Le

de, klasside ja seltside tasemel. Kandseente seltsid vastavad kladidele

ud resupinaatsetele seentele, palju vigu

ud 3 korda evol. jooksul. Hibet väidab, et pea kõik pr-mä seened on dipolaarsed ????. Väidab, et on väga oluline seos okaspuu pruunmädanik on toenä  
x evolutsioon

ub 1000-4000 a INSDs 16969 seeneklastrit + 9432 singletoni 93% ITS sarn põhjal. Pakub võimaluse keskkonnaproovidest liikide :

korda muudest viljakeha tüüpidest. Nad on kaotanud eoste laengu ning esinevad teised levikumehanismid. Teistpidi arenguid pole

ksnoomia

N

oimunud horisontaalne ylekann

raldi monofüleetilised. Tekke kohta erihüpoteesid LSU ja mt DNA põhjal

Lentinula edodes: kosm

ud, ITS1 v varieeruv

Ceratobasidium bicorne -1-tuumaline Rhizoctonia: tõ  
1-tuumaline Ceratobasidium bicorne on okaspuuseemi

zomycetesist järgmine haru

rosk seemnetega, ent mujal pole olulisi seoseid

erimine annab nõrgemaid tulemusi

c maailmas: levikutsenter California; Arbutus parafüleet; levinud Euroopasse arv NE-Amst.

les fossiile leitud 96-92 MAT, mis olid ühed esimestest domin lehtpuudest. Muidu Podoc, Arauc jpt; Weddellia prov on arv tekkekohaks Nothofagaceae

eletavad 32% herbivooride põhjustatud kahjust.

ema massi juures, kõrgemal troofilisel tasemel, meres ja maismaal vs magevees, Ameerika kontinendil. Erinevatel kontinentidel ja

ised happed (pms 2-lisaelektroniga), mis puhverdavad pHd rakus ja tekivad raku liigeses aluselistudes. H(2)PO4 puhverdab pHd nii mullas kui rakus. Eri

Pisolithus, Suillus

Collembola eelistab mõnda ECM seent teisele, eriti n

all, süs, morf(TOE 426) 1 x gen Tom-opsis

all, süs, morf, määraja (TOE 52)

REGRESSIOON; anova

Thelephora terrestris, Suillus luteus

raalainete kattesamisega mullalahuses Suillus, Thelephora

vs ECM seened 13C ja

arvavad, et Otidea on ECM, Ramaria, Clavulina saprotroofid 14C põhjal. Sowerbyella arvavad, et Otidea on E  
13C, 15N tuvastamine

C diskrimineerimine eri metaboliisimiprotsessides: ülevaade

imedus ja hemitselluloosi konts. Pole vahet EcM ja AM puudel. Maapealsete ja maa-aluste organitele suht lagunemiskiirus erinev l



imustes ja kompleksse inokulumi korral. MR tüüp, seeneperek mõju väike

See aitab vältida ka arengut parasitismiks. Mudel.

3 C) näide

näidete kasv kiirem ja EcM kolonis väiksem lõunapoolsetel liikidel ja pop-del.

v. Jätkub hoolimata paljude partnerite olemasolust; taimedel ilmselt lõhestav valik, sest samad geenid mängus MR seente ja patogeenide vahel. (Smith 1994: 255-271).

max aktiivsus 10 päeva pärast), MnP (aktiivne 10-16 päeval), LiP (vähe); orgaanilised happed: fumaraat, malaat, oksalaat (HPLC Nematoloma frowardii võib asendada H2O2 MnP reaktsioonis. Tekib oksalaat /aade

**Lyophylleae: Lyophyllumi** koosneb mitmest polüfüleet osast. Lyophyllum semitale ja L. decastes ähenemine 15%lt 1%ni. Arv. Kõrge N korral ECM seened saavad vähe C ja seetõttu rohkem saprotroofe. Kõrge C korral jõuab C 3-4 p pärast 13C rikastamist, mis tähendab et primordiumid saavad uue C-süsti arenguks, mitte ei kasva vanast raskusest. Seened eelistavad happelist pinda kõrge C/N suhtega. Seega, nii pH kui ka C/N suhe otseselt mõjutab mikroobide osakaalu

M; Miombo ja Mateshis palju EcM taimi. Leiti et ka Faurea (Proteaceae) mood EcM -pole tüüpilisi proteoidseid juuri. Kalaharis (sadu 700 mm/a) pole 13C sisaldus vs sapro vs ECM: 13C sisaldus v

ilmselt arvatud

toottu seal vähe ka N2-fikseerijaid

used, probleemid

hmaspets probed. Kvantit määramine, protokollid pole antud

1 (MP; NJ; ML) + Bootstrap vs Bayesia meetodid

|  |  |  |
|--|--|--|
|  |  |  |
|--|--|--|

anne kottseentel toen viiruste kaasabil

inokulumi suurus on tähtsaks sessiooniline rida: h

eris

, sisaldab Psathyrellat, Lacrymariat jt. LSU varieeruvad ja konserv domeenid, LR5, LR7, LR21 jt LR-praimerid

lymnoxipaxillus spp nov ARG,CHL

nd liigid. Mitmed seotud nii Fagaceae kui Nothofagaceae-ga. PNGs pms märtsist maini, vähem oktoobrist märtsini. Mõned liigid levinud L-Ams ja NZL a (Boletochaete-st), Verrucospora (Cystoderma sarn)

hohofaguse metsades ja siin-seal Indias, Jaapanis. Arv levinud põhjapoolkerale läbi Indo-Malai. Lähedane Rozitesele

ades ei sarn NZL Boletustega. Uued liigid Tsiilist

lalai saarestikus. PNGs pms märtsist maini, vähem oktoobrist märtsini.

(sarn Inocybe, ent mitte-EcM metsades), Morobia (sarn Lepiotula pisike dsapro), Termiticola -vaid termiidikuhilates Castanopsis-Lithocarpuse metsade ümbritsevatel mandritel. Arv et muud AUS EcM taimed on oma seened saanud Nothofaguselt. Nii saproobidel kui EcM seentel palju liike või liigikomplekse. Hygrophorus (5 liigiga) on EcM; tei **NZL Hygrophoraceae: arv** ainult perek Hygrophorus (5 liigiga) on EcM; teised -Camarophyllum, Hygrocybe, Gli

itte aga lõigatud juuretupid eritavad ke **Pisolithus** **Pisolithus spp, Lactarius deliciosus, Paxillus, Suillus**

ikades). Habitat filtering tähtsam kui konkurents koosluse str seisukohalt. Arv sõltub elupaiga heterogeensusest

li test

**OLULINE!**

rinting ülehindab ja puudulik proovivõtt ning taksonoomia alahindavad muhtrit  
onjug kui lod valiku teel; väike väljasuremus arv, OTU ja liigidefin

l. 21: 2116-2129.

x

min Russuloidid; 400-a domin Russuloidid. **Liiga väike proov, liiga vähe proove, 400a metsas puud jaotusid ebatühtlaselt**

aalas väike, vaid monel liigil suur (Lacc xxx

+Gomphales). EcM harud 1)Hysterangiaceae+Maseophelliaceae+Gallaceaeceae; 2) Gautieraceae, Ramaria pp., Gomphus, Gloeocantharellus?; 3) mõne  
ine klaad hõlmab ainult põhja-poolkera liike, teine nii põhja-kui lõunapoolkera liike. Tek pigem eukalüptidel ja neilt levinud ka Nothofagusele  
aerobolaceae; Pyrenogaster, Sclerogster, Myriostoma; Geastrum+Radiigera p. Parte

ele tunnustele gruppide kaupa, ü flexible

le kladistilise v klasteranalüüsi asemel tuleb kasutada vikariantsusel põhinevat analüüsi ja eelnevalt need sündmused üksikhaaval välja selgitada  
cese Venezuelas ja Atlantilises vihmametsas RdJ osariigis. Kokku L-Am 77 liiki Taksonoomia

netr ja vett varuda. Lyrebird kisub metsas enamus taimi mullalt üles. Arv P sisaldus on limiteeriv faktor Nothofaguse kasvuks ja regener.

lus involutus. For. Stud. China 10: 95-100.

i filogeneetikasitluse lühiülevaade. LINK

**mikroobioom inimese: normaalselt Candida, M**

lus: Chimera\_Check

ine: rarefaction, parameetrised, mitteparam meetodid, head ja vead; VIITED

: ITS polümorfism; ülejäänutel polüm kuni 3.27%. >3& 1 juht 200st; >2% -3 juhtu 200st; >1% -8 juhtu 200st. Perekonnas Amanit

Et mikroobiel kehasuurus ei piira levimistöenäosust ega määra pop-tihedust ega areaali. Teadvustavad, et 16S pole liigi, vaid perek

n proovide summimise tõttu

analüüs

: SSU); selles paiknevad Gautieria, Clavariadelphus, Gomphus, võib-olla ka Phallales LSU järgi. **Eellane saprootroof ja ramarioidse viljakahaga** (Bruns 2)

**Laccaria laccata**  
**palju**

sald mitmeid seeneliike. 1650 bp suurune fragment ei kõlba RFLPk. Palju kandseeni, üksainus AM-seen!!!!???

**seente diversiteet 2 rohu**

ikjl ymber paju. Lepa juures ei kasva. Leiavad, et Pyrolate hea kasv pea täielikus varjus ei seletu millegagi, ent pakuvad 1. C kandmist mööda risoomi;  
nud varieeruvus suvel ja kevadel, mison arv põhj arktika jää erinevates tasemetes

eri koosluste võrdlemiseks rDNA eri cutoff väärtustega. Paariviisiline align > UPGMA klasterdus >cutoff väärtus > PCR või klasteranalüüs eri aladele.

odustab indiviidide rohkust, mis omakorda soodust liikide rohkust. Erandid on noored linidid, mis tek parasvöötmes, ja väikesed  
l tööle. Lisaks: blokk-disaini võib lahendada ka tavaliste ANOVA meetoditega, aga vähemvõimas

bid, sagedus, ANOVA ja X2 võimalused ja möödapanekud, prooviühik; proovivõtmetoodika

eb igati vältida. Oksaneni peksmine. Replitseerimata andmeid saab analüüsida regressiooni abil ja mitmeF ANOVA korral interaktsiooni jr. Vähevõimas  
etod, purustamine külmas 3\* kloroformi ekstraheerimist, isoprop, etanooli pole. Edasi DNA ja RNA eristamine Quiageni komertskitiga. Väga tõhus

meestaimi. Cenoc isolaat nakatas okaspuid, aga mitte yhtki lehtpuud. Kui lisada liiga palju Glc, on taime kasv inhib arv seente eritatud pigmentide tõttu

**Limacella illinata -N**

**kultuuris EcM kandseened** ei tooda koniide; Limacella NM toodab

rdseenel ja cenococcumil puudub võime lagundada tselluloosi, pektiini ja ligniini. Paljud väidet EcM seened on valemäärangud (X  
asma imperiale: ei lagunda tsellul **Catathelasma imperiale**: mood vähearenenud EcM männil 2-kihilise Hniga

**Caladenia formosa: Serendipitaliigid**. Experim sama liigi tüvedel üsna

andaarstr

ura SSN, Manamgoda DS, Martin FN, McKenzie EHC, McTaggart AR, Mortimer PE, Nair PVR, Pawlowska J, Rintoul TL, Shivas RG, Spies CFJ, Su  
earchers. Curr. Res. Environ. Appl. Mycol. 3: 1-32.

nimekiri MHP-ga seotud seentest

Pyrola aphylla (mükohet), Pyrola picta: palju EcM ja endof seeni. Indiv Pyroleae: varjutamine ja juurkontaktide läbilõikamine ei suurenda oluli

za

Orchis jpt orhideed Ungaris: eri niiskusega kasvukohtades seonduvad märgalade orhideed kultuuripõhine: Tulasnella 2 suurt haru, Serendipit ammooniumiseened: Alnicola lactariolens ja Hebeloma vinosophyllum mood EcM eriti uureaga mükohet Afrothismia (Burmanniaceae) juurtes on 2 seent: AM-seen ja endofüüt, nr

Tuber albidum ja Tuber aestivum sarapuul Riessia -Shoreal ilma hartigi võrgustikuta

!\*, Tm-st 5\* madalam, ekstensioon 35-100 bp sec-1, tsükli arv; praimerite ehitus ja disain ning Tm arvutamine, platoo efekt

Tuber spp

ii transformatsioon Pleurotusesse ja selle transkriptsioon

Pleurotus ostreatus

otsenti kogumassist; Netoprod suurim aprillist juunini, suvel domin resp konsumptsioon. Erin teistest analoogsetest taimedest ei soltu P incarnata suurel od tingimused, mensur katsed, vaatluskatsed: levik, kestvus, liikide & gener arv jms stat itme osapoole fülogeneesi kasutamine; taime fül määrab lehelõikajate ja neil olevate parasitoidide interakts; parasitoidide fül-stpee

looslused selgelt erinevad. Arv põhj. Kas konkurents või erinevused levimisviisides

Tricholoma robustum jt spp

oni proovide ühtlustamiseks biomassi järgi

olivaceotinctus on er kohastunud ruderaalse eluviisiga. Võib-olla mõjutab suurem hüdrofoobsuse teke eri seente konkurentsi hoopiski

vad bor võõtme liike. Eriti hästi näha karpidel

e 4B kui teiste sepharose ja sephadex-ga. Isetehtud kolonnid phala kuulub Helotialeste sekka

nis olid olemas algmed pea kõigist tähtsamatest suguk-dest, sh Caesalpinaceae. Põhja-Aafr sarn floristiliselt Eur-ga. Hiliskriidist Ida-Aafr Dipterokarpi

remeesringiga (N-Am, E-aasia) ja kitsa; Suillus granulatus: feneetiliste tunnuste ja ECM mood edukuse põhjal mitu väliselt eristamatut liiki: laia peremee Orchis spp: hübriidid on agregeerunud emapoolse vanema juurde, mille Dactylosrhiza 5 spp Belgias kõik assots Tulanselladega, eri liikidel sarr Orchise liigid assots 4-9 Tulasnella liigiga v.a. Orchis mascula, mis sec Orchis üle euroopa: Tulasnellaceae, vähem Sebacinaceae, + mõned EcM

õimaldavad efektiivsemalt toitaineid transada ja stimul signalisatsiooni

Tomentella stiposa 2 alatüüpi, mis morf pooldest veidi erinevad [voib-olla juhustl], ECM kirjeldused. Erin rakuseinte paksuse, mantli mustade laikude ja Ungari tasandiku metsades analüüsitud vaid Tomentella ektomükoriisad: enamasti vähemusmorfotüübid, 4 a piires samas paigas suht püsivad, arv. Mela

rog: IGS2>IGS1>ITS. Kogu maailma populatsioonides geograafiline ja pikem ökoloogiline koondumine klaadidesse. Praimerid Schizophyllum commun mycota hõimkonna nimeks. Rozellaal on genomis kitiini süntaasid olemas, aga kitiinkesta ei moodusta; arv tek meres, kuigi enam sil: parasitsed Rozella allomyces + Microsporidia on basaalsed seened. Viburseened ja ikkesseened on parafüleet, sest vibur on kadunud mitmeid kordi

evimist mol evol kiirus kahaneb, mitte ei kasva!

5 markerit suudavad eristada 10/12 mol Hebeloma cylindrosporum

Cenococcum, Lactarius cf subdulcis

dega ja arv ka troopiliste ökosüsteemide pindalaga piirkonnas. Troopilise kliimaga vs muudega oli mitmekesisus suurim. Leitud ka Nothofaguse eellane geeni: liikide vahed väikesed, 98.5% ITS1 v ITS2 (kokku 97.5%) sobib barcode'ks. Väidet T. inocybeoides on T argyr ja T scalp re nikutes, P. vernalis parkides-aedades, P. filamentosus lepikeutes

emid. Hoolimata kõigest tuleb kasutada PCR-I BSA stabilisaatorit, Taq Start antikeha v hot starti. Puidust DNA eraldamiseks kasutada 1% CTAB! Mid: .270-140 MAT. Ameerika liigid eraldusid u 42, 40, 18 MAT, levides narv üle P-Atlandi silla. Puberulumi, Melanosp, ja rufumi rühmad levisid arv üle B

rinev, aeglasem Kesk-kriidis ja K-T piiril; erinevates linnurühmades ja maailmajagudes samuti erinev diversif kiirus. Troop ja mitt

e riisil

DNA eraldamine puidus  
praimerid Thantephorus

1 palju kordi. Ülevaade

na palju-genotüübilistes kooslustes

ja paljal mullal kui Festuca rubra ja 12 taime segakultuuri puhul.

' + branch ja bound algoritm puu jaoks + bootstrap

põhjal valel nullmudelil ja tegelikku neg tagasisidet pole

arvukate mudelite kontrueerimine teatud küsimuste lahendamiseks. Akaike kriteeriumi kasutamine selekteerimiseks

parasiidid vs sümbiondid

paasitism vs mutualism

Armillaria: sümbiont vs

nalooog

eriti mulla niiskus. Sarnased ökosüsteemid üldjuhul klasterdusid.

jt orgaaniliste hapete roll mullas: liiga madal kontsentratsioon lagundamiseks, pooleluiga kõdus 1-5h, min-mullas 5-12h; mõõtmisprobleemid; mikroobid

Laccaria, Thelephora

looduslikult koloniseeritud istikutel puudub 0.5 m peal

tiline akt juuretipudel suureneb pärast N väetamist. Mõistlik väetamine ei vähenda EcM seente aktiivsust toitainete kättesaamisel ed toitainete omastamise protsessid ase Wilcoxina, Amphinema, DSE ECM ja AM sümbioos kui parasitismi-mutualismi ko

ntel erinev liigiti ja eri kasvukohtades; ühe taime piires seeneliikidel erinev, samas koosluse tasemel üsnagi kattuvad profiilid hool .: Sagedased veeseened

: struktuur: metoodika eristamiseks kasutades Bayesi puid ja SIMMAP proget

2: 143-156.

Favolaschia Zambiasi orhideedelt Polystachya sp ja Microcoelia sp moodustab ass

8 eraldi vs koos

seerimiseks. Output pdf.

mene: sõltuvus 11st on asymm; enamikus tolmeldajate ja seemnelevitajate rühmades v madal

valivad ränim mineraale oma kodade ehituseks ning suurendavad mineraalide paisuvust

hhibitsiooni ning kasvu kompleksel toiduallikal. Lihtsal toidul liigirikkus inhibeeris v polnud oluline. Arv et antagonistlikud inter: polnud oluline. Arv et antagonistlikud interakts Serratia bakteri invasiivsusele. Siiski, kõige liigirikkam kooslus polnud kõige vast

OrM: *Cephalanthera damasonium* rohelised vs albiinod: seened samad, tomentelloidid ja  
*Cephalanthera damasonium* rohelised vs albiinod: seened samad, tomentelloidid ja

ivus, peremehega sobivus, konkrentsis ellujäämine. Nende hulgas herbivooria ja bakterite poolne fungistaas eoste idanemisele ja kasvule.

mustega kui NJ analüüs

ustes

536 andsid erinevaid tulemusi. Väga palju oli kimäärseid molekule (eri praimeritel 31-40%). Arv et nn. Schadti ja vandenkoorn mullaseente sekv mullas (t!); paljud bakterite OTUd kattuvad lõuna- ja põhjaparasvõetmes

*Tuber melanosporum*

ilii viljakeha ja arbuusijuure ITS-RFLP kattuvad. Juures endomükoriisa"" septadega ja struktuuritu

ivad nii juured kui AMF hüüfid. Osakaalu raske hinnata

lling vs mulla mikroobid ja nende ensüm akt aastaajati: Girdl vähendas juurte kolonis alles 14 kuud hiljem u 60% võrra, peenjuurt ainult vegetatiivselt

tuvalt mismatchidest ja degener pos vs annealing temp vs tsüklite arv; heteroduplexid, kimäärid ja nende tekkeviisid. Soovit mitme yptiga seotud seentele disainitud markerid ei sobi muudele tyvedele

1 seonduvad *Pisolithusega*, mis ei koloniseeri teadaolevalt dipterokarpe ega mäнди, kuigi männi omad mujalt leitud eukalüpte kolon

omatogramm gen str uurimiseks

*Thelephora*

sterisse

uvad mutualiste ja vohavad

x

palju, valitud DNA analüüsiks

*Heterobasidion annosum* cDNA rmtk: geenidel vähe s

ommunities. FEMS Microbiol. Ecol. 70: 388-401.

*Epidendrum firmum* epifüüt: assots laialt Serendipitaceae ja *Tulasnella*

*Amanita porphyria*, *pantherina*, *spretia*, *rubescens*, *Cenoc*, *LEPISTA GRAVEOLENS*, *LEPISTA*

*grandiflora* (ektendoMR). ILLUSTR; muud taimed AM, *Pedicularis* NM; VIITED, ülevaade

*anthaceae* pole, sõsarad *Spondianthus* ja *Bischofia*

k olemasolevasse aligneeringusse

le - nn profiilide aligneerimine suurde MSAsse

) pipeline: andmebaas, deponeerimine, bulk blast, align, puude tegemine

IGS1: 14/490

*Phellinus nigrolimitatus*:

*Fomitopsis rosea*

*Trichaptum abietinum*: t

i. Dik org-s kummaski tuumas erinev ITS v IGS versioon. 85% juhtudest ITS1 ja IGS2 samad; 95% juhtudest ITS1 ja ITS2 versioonid samad -mingil ta: m. 3 krüptilist liiki, millesharvad hübriidsatsioonid EF1alfa, Beta-tubuliin ja ITS-s. ITS ü homogeenne, teistes tulevad tugevad erinevused. Allopatr mik

*Lyophyllum shimeji*

*Lyophyllum shimeji*=L. *Fumosum* EcM mood juurutatud vartel. Mood puhaskultuuris ka viljake

ine Michaelis-Menteni kõvera jr: v hea max ühtlases kk-s, vilets norm-tingimustel (taimed). Konservatiivne kui n<B, optimistlik kui n>B; R2 ei saa kas

u korda

d tsellulolüütilistele seente ensüümidele. Rohkem genee leiti N-vaesest vrd N-rikastatud mullast (v.a.Ox dekarboxylase, kitinaas)

ilogeneetiliste distantide jaoks

lel fülogeneet üledispers

aktuuri tuvastamises: soovit Brownian motion

arvutavate progede võrdlus: eri tulemused Chao1, Sace jt; VIITED

loga, v põhjalik seletus ja lahtimõtestamine

mullaseened erinevad ol

Rhizopogon 2 spp

PsT tristic ja Xerocomus sp (1 ala)

Tomentella, Amphinema, Pseudotomentella esmakordselt viljakehade uuringus

3

Pyrola rotundifolia arbutoidse mykoriisa kirjeldus: kandseen, paks mantel, tugev rakusis kolonis, haustorite seed

x MHB

Cenococcum

orreleeritud

hizal symbiosis. Science 333: 880-882.

id Moriin ja Hesperidiin induts Suillus bovinus eoste idanemist

nuu sodi pärast

riae triibusele septade ultrastr jr; Cheilymenia ja Scutellinia on erinevad, ent omav sarn

Pezizales seltsi tasemel, raskemini suguk tasemel. Perek tasemel peaaegu identne ultrastr Aleuria-Leucoscypha on omavah seotud, Octospora-Anthraco

Pezizales seltsi tasemel, ja enamasti suguk tasemel. Perek tasemel peaaegu identne ultrastr . Tuberales toodi ultrastr põhjal Pezizalesse ja Thelebolus er

ajas vaid üks alleel

ja x2 testi abil üht tüüpi märgistusega genoomse DNA abil.

ru ja EcM haru on sõsarrühmad ITS+RPB2+LSU baasil. Maasis vk-dega harud on tek mitmetes saprotroofsetes rühmades; EcM rü

.

:g. AM seened potikatses vähendavad eukalüpti efekti teistele taimedele

naliüü:ülevaade meetoditest;

hkem arbuskuleid kui eksootilistel; -> Invas taimed mõj seenekooslusi läbi taimede BD vähendamise

Rhizopogon spp

; Lact rufus

a 42.6% olid NM. EmH järgi leiti proovist 4 liiki vs 3.1 EmH-na, kokku 31 EcM-na ja 24 EmH-na. 3% kimäärseid sekventse

is ja põllumaj-maal

iseks

15 tsükliit + puhastus + 5 tsükliit. Kimääride tuvastamisproge link ja barcoding tasemete proge link. Väidavad, et ka 99% barcoding krit 16S rDNAle on

Laccaria, Cenococcum

xxx

mullapatogeeni määravad taimede edukuse, haruldus

tid suurendavad mikroobide biomassi ja mitme ensüümi aktiivsust mattides, ent erinevusi pole kui kaaluda mikroobse biomassiga.

ktuuri ja olemasolevate andmete põhjal tehaks kindlask, kust proov võiks pärineda ja kas tegu võib olla reostusega  
ioonidel: ülevaade ja Templetoni NCA mahategemine

: ITS1 regiooni (pseudogeeniid, hübriidsatsioon, heteromeeretes kromosoomides: jams), ent muu sama; mch, ITS1, ITS2

taimed + ECM + saprotoofid TNT bioremediatsioonis efektiivsed

taimed + ECM + saprot

Madala toitainete sisaldusega muldadel EcM parandas konkurentsivõimet, vb ka muud hüved

tebaas ja veebipõhine analüüs

iope tetragona (4/9); Pyrola grandiflora (7/8). Kokkuvõte varasematest arkoalp. Töödest. Selgub, et Cassiope on EcM N-Am; Saxi  
uurtel. Liigikirjeldus ja EcM-moo Neocudoniella radicella kuusejuurtel. Liigikirjeldus ja EcM-moodi struktuuri kirjeldus [tundub,  
ade: allo vs sümpatriline, polüploidiseerumine, genoomi introgressioon, hübriidiseerumine. Kodust seente liigitikke mehhanismid: ülevaade: allo vs sümp  
!l: 403-412.

13C: saproobidel fraktsi

nine EcM seentel arv fakultatiivne lagundamine EcM seentel arv fakultatiivne. Ei tohiks ranget vahet teha EcM lagundamine EcM se  
:liikide esinemises, ent 3 rühma olid ette antud!!!

edafon ei mõjutanud sap

Suillus, Cenococcum, Amanita jt

tandard: 3 4st peab kattuma. T-RFLP kapillaar-geelektroforeesil ABI 3100 masinal

ECM mütseli uuringus

stabiilsuse tagamiseks hübriidsatsioonil; oligonukleotidprobed 16-24 bp; dissotsiatsioonitemp, pesemistemp optimeerimine; 1 bp valepaardumise kor

1986 1990-1994+ süsteem  
3 liiki

1986, 1990 tomentelloic

Hydnellum; 76

Tomentellopsis sp

or Soil, Real-time PCR AM seeneliikide ITS regioonile, mis teeb määramise 6x odavamaks ja kiiremaks süsteemis, kus 13-14 liiki;

Colletotrichumi peremehe-spts tüved põhjusta

Peziza whitei kui Laccaria sp-ga. Mantel v õhuke v fragm ja epidermise rakud ei pikene (v.a. Fabaceae). Kõik seemned stimulis kasvu 1.5 -90kordselt

t rikkuse soodust EcM liigirikust

kuuseokka kodus: B

maksasammaldel: Jungerman maksasammaldel: Jungermanniales: Sebacinaceae + mõnedel tundmatud kottseene

üll; puudel AM-seened ühised paljudel liikidel;

Ecuadoris: Maksasamblad ja orhideed: Tulasnellales sekventsitiivid kattuvad mini

Cenococcum

Suillus grevillei

T. submollis sisaldab palju rohkem Mn xxx

Attractiellales on Tulasnellade järel sagesudelt teine mükobiontide rüh

er-Verlag, Berlin, Germany.

isald mitmeid krüpt liike, millel pole peremehe-eelistusi. T. leptoderma indiviidides on 2-7 erinevad ITS alleeli, mille sarn on 98.0%

um carthusianumile)

eina-pez gerardii klaadis

tugevat taime vastureakts; mõju taimele Terfezia ja Helianthemumi suhe pole EcM, kuigi seda väic Terfezia ja Helianthemumi suhe pole EcM, kuigi seda

DGGE: Ammophila arei  
DGGE bändid: bakterid

l; lat asemel oleks pidanud k temp vms  
tuuri analüüsis määravtunnuste rohkus kui tegu 'limiting similarity', Power suurem kui valim on u 50% liigifondist

lmakerke-ornal pinnasel; helianthemum karjatamist vähetaluv

Pyrola rotundifolia arbutoidse mykoriisa kirjeldus: kandseen, õhuke mantel, taimeraku tuuma muutused. Tugev r

kuni 450 km polnud tähtsust

Thelephora, Amphinema, Laccaria)

fülogeneet determineeritud mooduliteks. Parasiitide peremehed on pigem samades moodulites, aga parasiidid ise on moodulites juh  
põhjal keskkonna, kliima, fülogeneesi mõjude hindamine parasiitide kooslustele  
regionaalselt fülogen signaal puudub, ent kontinentaalskaalas on see oluline; sarnased kirbuliigid ei jaganud sarnast ohtrust ega pei

Atp6 parandab sugukondade lahutusvoimet oluliselt, ent perekonna-ja liigitasemel on vilets

CG ja CAC kordustele; pikemaid allelel Rhizopogon 2 spp

oboletinus, Gastrospora; lehis esialgne peremeestaim

amine

OrM: Neuwiedia -Ceratobasidiales, Tulasnellales

ilide statistiline võrdlemine: igale jooksule arvut Pearsoni korrel-koef ning vrd grupisisesed korrel gruppidevah korrel-ga kasutades Monte Carlo simula  
sperma (NZL= Cortinarius); tek Lepiotast, sageli kasvab koos Rosaceae-ga  
d väidet Pisonia grandise alt, ent ei välistata teisi peremehi.

Laccaria bicolor

/ seotud Cercocarpusega (Rosaceae)

Hygrophorus purpurascens EcM süntees jpt

CWD: ECM viljakehad

itüm ha kõigi rakuseinte eemaldamiseks ja ka fenoolide vastu

fallax: corticocin -sünteesib siis kui on süsivesikuid, nt side peremeestaimede juurtega

ferentsid

riegatus ja mänd erinavad oma substraati Suillus vriegatus

stimuleerib MnP (aktiivsus fenoolpunasega mõõdetud)

distantimõõdud ja meetodid: ChiSq ja Pearson Corr efektiivsed gradientide puhul; Gower ja Canberra diskreetsetel juhtudel; 100

xxx

Leotia lubrica arbutoidne mükoriisa Comarostaphylosel

et autokorr samaaegne arvestamine: parim moodus on ruumilise analüüsi jääkidesse fülogeneetiliste vektorite sobitamine

orhideede mykoriisa isolaadid: moned stimuleerivad, teised mitte orhideede idanem

nia solani -Agde ITS varieeruvus: ITS1 varieeruvam kui ITS2; AG-sisene var 0-3%; AG1 jaguneb Thanatephorus cucumeris=Rhizoctonia solani -Agde l

ivad BD tsentritega: 1) Katanga 2) L-Aafr 3) Keenia mägiimetad ja Eastern Arc; 4)S-Kamerun --Gabon

Pinus edulis: isolaatide  
Clitocybe, Lepista: nitril

risosfääri seened tamme



elis: viljakehas avalduvad antioksidantide geenid jms

Austraalias: pms ida ja lääne vaheline levikujoon. Ida liigid levinud arv korduvalt ka NZL-i. Arv ida-lääne piir tek paleotseenis

Eucalyptopsis (Uus-Guinea), Arillastrum (Uus-Kaledoonia) jt. ECM eukalüptidid tek hiliskriidis Austraalias. Mõned Eukalüpti liigid levinud ka Mindanao,

ega: ökoloogia ja fülogeneet kuuluvus (Mattirolomyces -NM Peziza proteana), (Kalaharituber -Iodowynnea; Eremiomyces echinul

Wilcoxina-ülevalde peremeestaimedest; katseliselt EktendoMR männi ja lehisega, ekto teistega+ kask + haab v  
Paxillus involutus: tüüpiline ruderaal. Kolonis. Kaevatud maad, põlenud alasid, metsataimlaid, väetamine stimu

les. Statistikud ja presenteerimine

kuuse geneetiline mu

mullaseened vs endo

1 Eriogonum, Antioogonon

Pisolithus sp  
Pisolithus sp  
Pisolithus  
Pisolithus  
Laccaria bicolor

1d. Arv. Et rott on v efektiivne eoste levitaja, läbides päeval 1 km

mineraalide lagundamine:ülevalde

Suillus bovinus, Paxillus

1d. VIITED.

1s: A) Pezizaceae, Ascobolus; B) Gyromitra, Morchella, Caloscypha, Tuber, Helvella; c) Sarcoscypha, Sarcosoma, Pyrenomataceae

1

1uksessiooniga, sest ECM taimed on võimelised min-aineid seente vahendusel paremini kätte saama kui AM taimed; hüpotees: 1ECM peenjuured lagune

1n SD; erinevused suurenevad ajaga; mitme liigi segu kogutoodang on suurem kui vastavate liikide monokultuuri keskmine. C-ühel

Paxillus  
Paxillus  
Paxillus, Pisolithus  
Paxillus

1nerevees ja parasiidid; taimekudede nakatamisvõime tek 2x - Pythium ja Phytophthora; loomseid rakke nakatavad kõik rühmad v.s

1ge BAMBE

1Piloderma fallax = bicolor = croceum ja eristamine P. Byssinumist värvi, tsüstidoolide, eoste, basiidide jr

1e sõsarühm Hericium, Heterobasidion

1e, sõsarliigid/vormid eristuvad lehtpuu vs okaspuu peremehe järgi. JPN shimeji on kuivades SWE männikutes

Serapias-orhidee saab org-vaesel mullal ise fotosünteesides C; orgaanil

ud. Euroopas ei elanud üle jääaegu. Puudel raske ehitada kompleks külmakaitsemehh. Erandina Am-s rohkem Carya, Crataegus, Quercus kui Aasias. C. v. Erinevused survega geenidest. Metsapuude näited

tausside metabolism troopikas palju efektiivsem ja seetõttu liikide nishid on laiemad.

ja radieerus kiireti peale teket; EcM harud tek peale 30 MAT (Amhersteae ja Acacia).

disjunktid 2-3 x vanemad kui kontinentide sisesed disjunktid; Levik mängib palju olulisemat rolli kui tektooniline ajalugu, eriti sarn kooslusetüüpide vahel radieeruda

ilt kandseente hulgas, eriti palju Corticiales ja Cantharellales seltsides. Lihhenikoolsed seened tek korduvalt v erinevatest muudest toitumisvormidest. Lil

Tuleb kaitsta ka inimhäiringutega kooslusi, sest mitmed liigid tahavad just seda

ub. Juured ulatuvad väh 3 m sügavusele, arv 9 meetrini Metsatüüpide alustaimestik. Muld metsas palju niiskem ki hilisemas võsas. Miombo ja Marquesia uesia kasvamahakkamist Zambias. Vegetatsioonitüübid 1000-1600 m kõrgusel. Peaaegu kõikjal dominandid EcM puud

Paxillus  
Paxillus involutus G 21.5Mb

r fungus. Tree Physiol. 21: 71-82.  
Miner. Mag. 72: 85-89.

Suillus, Paxillus

vs ECMseened: roll loo  
Phanerochaete

mükoheterotroofid: ülevalde mükoheterotroofid: ülevalde mükoheterotroofid: ülevalde mükoheterotroofid: ülevalde

oil

Coltricia cinnamomea peetakse saproobiks

Coltricia cinnamomea p

NaOAc-isoprop-etanool meetodil

Thelephoraceae sp - efekt positiivne v neutraalne

Riessiella sp mood EcM nii Acacia mangiumi kui Shoreaga

taasis VK seeni. Suur enamus seeni kirjeldamata liigid

Dipterokarpidel: ülevalde ja viited kohalikele töödele

õrn kui kanoonilised (RDA) meetodid, eriti 2-d andmete puhul ja müra puhul

tuleb andmeid transformeerida: chi square omistab nullidele v suure kaalu; head on Hellingeri transform ja Chord. Bray, Sorenseni

n partitioning PCNM vektorite abil. Ülevalde statistikutest

Paxillus, Laccaria, Thelephora, Hebeloma

isi edasiarendus. Osaline regressioon maatriksite. PCNM vektorite ja koosluse str põhjal )01) tehakse sõlmede maatriks. Mõeldud

ultiv, DCA korral

): 151-160.

kiirem kui ML, MP, võrreldav teiste baieesia progedega. Skoor = P

teb krüpt liikideks, millel oma kindel peremees. Liigisisene ITS var 0.1-0,33%

berbee & Taylor, 1993: ECM teke varakriidis 130 mya

et al kalibreeringut ajas tagasi. EcM teada eotseenist. EcM taimed arv radieerusid ja levisid hilis-miotseenis ja pliotseenis nii N-Am kui Aasias kui toimu

probed: 30 -3000 b. Mida pikem seda intens signaal; Vahet pole praimerite keemilisel ja PCR-sünteesil; 50 bp probedel valepaardumised madald signa

Oomycota review

oidide omadused ei pruugi olla aditiivsed. Mõjutab sümbiontide -tolmeldajate divergeerumine

Lecc scabrum ei mood männiga EcM, ent stimul selle kasvu . Suillus bovinus mood EcM, ent pc

formeerimine vs seundumine mullaosakestega, mis eriti aktiivne saviosakestega (er montmorilloniit) ja sõltub pHst; GMO taimede  
ilus. Soovit Bayesi meetodeid

Rhizopogon  
st täisküpsust 3 p jooksul; öösel n Amanita muscaria eoste levik; aja jooksul eoste suurus vähenes; eoste eraldumine max pärast täi  
):(Casuarinaceae(TicoD,Betulaceae))(Myricaceae((Rhoiptelea, Juglandaceae)))));;;; Ticodendron(((Alnus((Betula(Corylus, Carpinu

rt (7), Russ-Lact (4), Trich (4)

el testi analoog, võimaldab kasutada samaaegselt mitmeid dist-maatrikseid

Itaalias ja Makaroneesias. Neottieae miksotroofid ja seot EcM seentega  
Epipogium aphyllum - saab mingi osa N ja C seene kaudu; seotud Inoc

Cenococcum: ei mood ECM 2 pajuga, lepaga ja kadakaga

Pyrola rotundifolia, P secunda: isoleeriti juurtest mitmeid seeni, sh MRA1, pannaldega kandseen, MRA2, MRA3

mikrolüliljalgsete BD m

Ituumaline Ceratobasidium on nii kuuse kui männi ist

e ruumiline autokorrel

Tomentella subilacina vs Rhizopogon sp

Tom subilacina: eosed levivad paljute mullaselgrootute seeditraktis ja kitiinkestal. Võimalik levimiskaugus. Eosed vitaalsed peale esimest seeditraktist  
proovides palju, N-tundlikud N-tundlikus liigiti

nuutub enne rohustu muutumist. Arv, et Euroopas on seente BD vähenemine samuti seotud N-ga

appeid puhaskultuuris (Lact theiogalus) ja vastupidi (Cortinarius spp.)

e toodavad pigem ohtra niidistikuga liigid. N-väetamise all kannatavad eelkõige ohtra myc liigid - on arv liigseks kulutuseks taime  
uringuks on vaja sobilikke töö disaine, keskk andmeid, ja nende põhiseid mudeleid; distaalsed vs proksimaalsed muutujad, ; tuleb tekitada globaalseid a

T. Subilacina

T. Subilacina, Rhizopogon

Hypholoma

tel: klassikaline vs molekulaarne vs analüütiline tuvastamine. Sama seeneliigi puhul ei tohi kasutada vaid ühtainsat tüve

d kandseened eritavad eriti koloonia keskosas (mitte tipmises) kitinaase, er siis kui varem on seal kasvanud Fomitopsis pinicola

Suillus variegatus vs Hypholoma fasciculare; inokulumi efekt

värskes kõdus Helotiale

Suillus variegatus vs Hy

xxx

Hypholoma

ECM vs sapro toitainete liikumine ja aineriinge: ülevaade, diskuss

ECM vs sapro toitainete

ened lagundavad teatud määral orgaanilist ainet, ent N ja P kättesaamise eesmärgil. Neid ei saa saproobideks

ECM seened lagund

x

mullaseened; vs gird

99: 288–299. □

geenide tuvastamine EcM seentest: puudu Lactariustel, Canth, Hydnumil; 1 isovorm Coltricia, Hygrophorus, Cort, Pax, Russula, f

t, Ruanda-Burundi, Sierra Leone-Libeeria. Endeemidelt esireas Kapimaa, Põhja-Sambia, jt. Lokaalne liigirikkus korrel v tugevasti aastase sademetehulg

ti <2%, ent esineb >5% erinevaid kloone, mis on sarnasemad teistele liikidele. Pms transitsioonid, vähem transvers ja indel  
col. Manage. 259: 698–709.

. oligoprobed: ITS3B+biotiin -universaalne; ITS2 regioonisisesed probed liikide jaoks + dioksigeniin. Vedelühbridatsioon PCR produktile. Probe fluor  
vused: ülevaade

parem aminohapete lagund. Hübridis erinevam aastaajati kui paari m kaupa repl-proovides, ometi sesoons sarn kui paari km kaugustel replikaatidel

procrustes on usaldusväärsed meetrikud koosluste korrelatsiooni võrdlemiseks. PAM vektorite testimine, võimaldab vähe proove k  
perekonda Pinus ja Strobus; mõl vaid põhjapoolkeral; Pinus fossiilide jr vanem, feneetika jr noorem  
seks ITS. Barcoding gap 2-4%, soovit 4% liikide eristamiseks

õjul popd ristunud, eri tüved kõlbavad kääritamiseks; Sake ja veini jaoks mitteseotud tüved.

#### CHN-s: ülevaade

ühm Sordariomycetes. Pezizales on kahe iseseisva haruna eukottseentele basaalselt (100% baiesi toetus, madal Bootstrap) da aligneeringut ML-puude põhjal. Kiire, täpne

oligoprobet, pesitsi ja redundantsed seas. Õige- ja valepaardumiste eristamine mängides sulamiskõveraga. Külmhübridisatsioon. Vähene soolade konts p ühmade EcM staatus ei vähendanud negatiivset mõju Saccharomycetales ja Taphrinomycetales on monofüleet. Long Branch attractioni probleem ad; Leotiales Pyrenomyceteste sosaryhm, Discomycetes parafyleetiline; vähe liike!!!

grupid

Cenococcum  
Complexipes, Phialophora, Suillus, Pisolithus

entaalselt mõl eelistasid parasniisket. Arv EcM tõrjub AM välja sobivates tingimustes

emeid

imine lihtsate matemaatiliste funktsioonidega: binaarsetele sipelgaandmetele (tugevalt lognorm jaotus) lognorm ei anna usaldusv hinnangut. ICE ja Mich

imine rakuprotsesside visualiseerimisel; VIITED; VIDEO VIITED

el

ultuur

uurendab koosluse biomassi võtters arvesse iga liigi panust polükultuuris vs monokultuuris

i

EcM süntees: Salix spp + Entoloma nidorosum, Entoloma sp, Hebeloma pusillum, Pax involutus, Cortinarius pu

leemid, ülevaade

vaid AM. Noortel aladel NM Cyperaceae.

erinevad peremeestaimeti ja koosluseti ning sõltuvad, kas taim on mono või polükultuuris

õttu suurim BD just seal

õrühmade, kõrgematele taksonitele, universaalsed, 2 neg kontrolli, optimeerimine dissots-temp ja pesemistemp jr; tetrametüülammooniumkloriid A-T

struktuuri võrdlemine nii harupikkuste kui ka fül. Suhete baasil. Eeldab võrdset sekvenside arvu jackknifingus. Väljundiks kasutada peakoordinaatide a ntside arvust proovis, ent muid hälbeid ei olevat. Soovit jackknife'da proove, et oleks võrdse suurusega rdlemine ühes analüüsis, standardiseerides max harupikkuse jr tistik on parem, sest tekitab palju tihedamad klastrid, kuna binaarsed ja ohruse andmed võivad sõltuda eri teguritest iüs, permutation test, vajab fülogeneesi puud nexus või newick formaadis ja fili, kus kirjas, mis kust; saab teha haru kaupa

tika: ülevaade meetoditest ja nende olemusest. Webbi NTI ja NRI kvalitatiivsed, UniFrac võib olla kvantit

ananta, Laccaria, Pisolithus, Scleroderma

Amanita, Boletuse, Cortinarius, Descolea, Hydningium, Hydnum, Laccaria, Lactarius, Mesophellia, Paxillus, Pi

õptus on sõsarperek.

enid kandseentel: saproobidel kuni 8, ECM seentel 1 (3). Pole alati vastavuses ensüümkatsetega. Lakaas võib olemas olla, ent ei tule välja Petri tassil

al asuvad seltsid aga tõen parafüleet. Sõsarühm Eurotiomycetes

est sugukondadeni nimetades perekonnad

Laccaria bicolor

õ samad tulemused;

Laccaria, Hebeloma, Cortinarius anomalus  
hade/plottide suhtes; ka aastaajaline varieeruvus: oluline saak ka kevadel; viljusid pms A ja O horis piiril v veidi ülalpool

uulub Phallomycetidae alamklassi

re kottseen (mullal ja lagupuidul), viljub kevadel, Wash osariigis

nomycota basaalne ent polüfüleet., Pezizales päris-kottseentest basaalne ja monofüleetiline. Kandseentel põhiklaadid lahendamata. Ikkesseened ja vibursamblikud on päris-kottseenid  
elihtenise Omphalinaldel -nii 28S rDNA ja ITSs eriti AA ja TT saitides, kus võiksid muudustuda T-T dimeerid. Arv põhjus suurenev UV kiirgus seoses n  
va vs jääkide jaotused. Suunad ja olulisus võivad erineda - konservatiivne on pidada oluliseks, kus mõlemad on samasuunalised

Tomentella sp

Tuber puberulum, Russula ochroleuca

1-ITS4 kultuurist

ine oligonu-probede ja streptavidiini teradega

ylus, Ostya, Cyclobalanopsis, Fagus, Quercus, Shii=Castanopsis; Populus, Salix; AM leiti Eucalyptus, Callistemon, Tilia, kõik R

tega. Eraldati mingi vana meetodiga. Keetmisel jupid lühemad, akstreemjuhtudel <500 bp  
itte kauglevinud. Arv Dipteroocarpaceae tek sesoonses troop metsades, mitte vihmametsades

oni test

Th. Terr domin

Piloderma sp1, P. fallax

domin

Piloderma spp

kottseened: Pezizales ja Elaphomyces kui EcM moodustajad: kõigi autori töödest ülevaade, v palju kontrollimata

ioosivaba tükki.

l: esinesid Heterobasidionil ja Amanital Amanita regalis, Paxillus, Suillus bovinus

proteaasid: esinesid Het

nis domin ürgmetsas

Res. 16: 199-206.

Eucalyptus marginata EcM tüüpide Ohtus sõltub aastaajast. MR tüübid levinud eri horisontides.

palju

Suillus, Rhizopogon, Amanita, Hydangium, Hebeloma (3 viimast asustavad normaalselt ka eukalüpti)  
eukalüpti 2 liigi vaheline peremehespetsiifilisus v suur

cum Alnusel

on tek saproobidest mitmeid kordi iseseisvalt. Ei ole kodustatud parasiidid. Tselluloosi lagund supresseeriti koevol käigus. Pigem v

Tuber melanosporum

Tuber melanosporum, T. brumale

Tuber melanosporum

ine. 13C DNAs 2x, rRNAs 10x vahe

vus, eriti S. granulatusel

ITS: Cerris (Lobatae (Protobalanus, Quercus)): monofüleetilised rühmad Ameerikas ja Euroopas; põhjapoolkeral

v L-Hiinas; Lithocarpus SE-Aasias; Disjunktsed taksonid on eristunud miotseenis ja arv levinud üle Beringi silla. Kolumbia ja SE Aasia Trigonobalanus

lakaasi geenidele ja transkriptidele SB, NB, väh 5 geeni; fruktuus Glc asemel ja veratrüülalkohol stimuleerivad aktiivsust; aktiiv Trametes  
lakaasi erinevate geenide transkriptsiooni reguleerivad erinevad faktorid ja ajastatus on erinev Trametes  
vastamist ja takistab erinevuste väljatoomist treatmentide vahel  
useline ühendatus katkeb kiiremini; orgaanikas ensüümid vähem tundlikud kuivuse suhtes  
d on tek >15x. Eelduseks sklerotiseerumine ja seksuaalsus  
s vähem indiviide ja rohkem sugulist palj. Põhj arv. Liigirikkuse-pindala suhtes Z=0.17 mandril ja 0.28 saartel

Collybia fusipes

n Rhizinaceae-sse kuulub patogeen; Phymatotrichum on saproobne anamorf Pyronema  
maisi risosfäär Brasiilias: 20 maisi risosfäär Brasiilias  
Phymatotrichopsis omni Phymatotrichopsis c

iceae ja Myrtaceae. Hiljem er koos Podocarpaceae. Hiliskriidis levinud nii lääne kui idakaldal kuni 25\* S. Hiljem vähenes. Jääaegadel er areaali löu

viljakehade mass vs ECM

ts-probed, PCR pole, meetodit ei kirjeldata

üümanalüüs, oksüdaasid

oksüdaas

Batrachochytrium salamandrivorans ähvardab

test biodiversiteedi võrdlemiseks, proge arlequin; muud meetodid  
üiised

Pisolithus

I puuduvad geenid suhkrate ülesvõtmiseks mullast iseseisvalt;

rad suure indeli poolest. IGS sisald v palju mikrosatelliite, mis on sam teiste seente IGSle (Collybia ja Trich matsutake)

l lähedalt seotud ja asuvad Stereales-Russulales rühmas

nud Naucoria rhreophyllast

: tulemuste interpreteerimisega

plottides oli põlengu efekt palju tugevam kui tsistuse plottides. Nõlva suund ei olnud eriti oluline, kuid Boletus edulis eelistas tsistuse N-plotte ja Lecc c

Reunionil ja Guadeloupele mükohet orhideed on seotud saproobsete seen

OrM Reunionil: Network str Nested; spetsiifilisus madal; pms Tulansel

Thelephora terrestris moodustab s Thelephora terrestris moodustab savipottide välisküljel resupinaatse viljakeha

Pisolithus

Pisolithus

Thelephora

Thelephora

Thelephora

Thelephora, Pisolithus

teritsiidid, fungütsiidid

patogeenid vs ECM seened agaril ja looduses

Laccaria, Pisolithus

ge. 128: 259-268.

Laccaria, Hydangium

i.

palju

nist teiste varase st seentega; varase st seened nakatavad peremeest peale inokul joudsasti ka mittesteril mullas, hilise st seened vajavad sterilis mulda

Alpova, Pisolithus, Laccaria

Rhizopogon vs Truncocolumella sünt ja EcM SEM kirjeldus

Paxillus involutus

Pyrola, Chimaphila, Orthilia, Moneses: mantel hästi arenenud P-asarific

maasisesed

juhuperemeהל

eri peremeeste eelistused, juhuperemeהל

Cenococcum

Lyophyllum shimeji -EcM?, tek dihhotoomised juured. Teistega läks aia taha , sest liiga vara inol

1 family Inocybaceae. J. Biogeogr. 36: 577-592.

kasvavad Dicyme tüvedel

austraalias -kalibr Ida-ja Lääne Austraalia eraldumise jr 15 MAT. Leiavad, et AUS ja Aafr kladid lahkesid 86 MAT. AUS liigid on hiljem korduvalt di geene. EcM harud 1) Hygrophorus, 2) Amanitaceae; 3)Phaeocollybia??? 4)Hebeloma, Anamika, Alnicola; 5) Inocybe; 6) Cortinarius; 7) Descolea; 8) L geenide järjestuse järgi on kas Agaricomycotina sõsartakson või kogu kandseente sõsartakson.

J; suht hästi vastavuses feneetikaga, ITS pole aligneeritav; RPBII annab pluliselt juurde pärane (Bankeraceae liikidel polümorfism või pseudogeenid, ent muidu head pikad harud). Mõlematel teatud vastuolud rDNAga. Praimerid. e, sõsarsugukond Crepidotaceae, sh Crepidotus. Cortinariaceae on kaugel asuv; Inocybaceae iseseisvalt tek EcM takson. Sileda ja nurgeliste eostega liig lärtuste ordineerimine ja korreleerimine keskk parameetritega

aminopeptidase: ülevaade. 2 konvergentset ensüümirühma; mittespetsiifilised valkude lagundajad, v palju muid anabolismi ja sign rsiteeti

ossiilid Ida-Aafrikas, kahtlased fossiilid Eur ja N-Am. Perek kaupa liikide arv

leemid Eur nimedega, Paljud seened eri biogeo mustriga: Kosmop, Gondwana, Pantroop, AuS-MAL, Patsif, AUS-Holarktika. Austraalia seened: takso

Kitsaid endemismikoldeid pole teada. Mitmed sõsarliikidepaarid eristunud Ida-ja Lääne Austraalias, ent väga paljud liigid on levinud nii idas kui läänes.

M seened aitavad kaasa lagunemisele Dicymbe metsades, sest olulist lagun aeglustumist EcM plottides (vrd sapro ja lõigatud plottidega) ei esinenud. Sa

Pisolithus, Laccaria  
Suillus, Pisolithus, Laccaria

ward distant-põhised redundancy ordin RDA

, suurem liigirikkus, kollektorkõver järsem. Sarnasusindeksid proovidele. Proovide DNAd kokkupeksumine, et saada üle PCR nihkest (Walther,1994). M

potentsiaalsete peremeesente arvukus mõj 3 orhideeliigi idanemise, e OrM: Cephalanthera austineae (MHP): Tomentella spp; Tipularia bicolor: Tulasnel Corallorhiza odontorhiza - assots vaid Tomentella spp, eriti üks liik, mi Goodyera pubescens: assots vaid teatud lähedaste Tulasnella liikidega.

la vaid AM  
AM

lustr Castanea

I lega EcM seened ei mood EcM Ceratopetalumil

AM AUSS

odonia, Dampiera (Goodeniaceae), Baeckea, Calytrix, Eucalyptus, Melaleuca, Leptosy (Myrtaceae), Comesperma (Polygalaceae), Pomaderris (Rhamn

casvu

seened seigseente hulgas. Densospora t Densospora (Endogonaceae) -EcM seened seigseente hulgas. Densospora tubaeformis mood 1-2 rakukihise man lehekõdus haab vs ki

nalused ökoloogias

ltoitumist

:biomass, Bakterite osakaal, seente fülogeni BD; seega arv. Mikroobid on kiirem lagunemise taga

mal mood EcM, ent puudusid EcM võrgustikud. Pakuvad.. Et tööstustes, kus hütüfid ja juured said ligi olid erinevad kooslused kus isoleeritud

pärast monodomin metsas; teistel puudel madal elumus, ent AM metsas kõigil ühtlaselt madal; seemned 'kadusid' segametsas kõigil taimedel rohkem kui

onnections. New Phytol. 145: 539-548 vs orhidee orhideede MR Corallorhiza

Corallorhiza trifida -1 liik Tomentellasid varajases staadiumis Neottia: sebacina

Hydnum, Cortinarius2, Lactarius sp. Ka saproobidel kindelsuktsessioon, paarkümmend liiki esinevad kõigis staadiumites. Vahetult peale põlengut vilju

tulipunktidega. Ilmselt pikemaajalised stabiilse kliimaga paigad vukoha võrdlus. Kõik kasvavad metsades koos Fagaceae ja Pinaceaga.

ed happed metallide kelaatimiseks hüüfiseintele või mitte eritamine vältimaks liikuvaks muutumist  
ise ei kasvanud koos taimede Bdga

or. Res. 19:113-118.

Tilia tomentosa oli ühes kaevanduses täiesti AM; paljudel teistel oli ka AM lisaks. Lepal 12 tüüpi. Mantli paksus peenes 10-12 v

### Suillus 2 spp parand männi ja kuuse kasvu ja P omastamist

Rhizopogon roseolusele süstiti 22N ja transporditi 2 ööpäeva jooksul taime juurtelt eraldatud seentega sünt EcM Mycelium ra Mycelium Radicis Atrovirensi eraldus, kirjeld Suillus grevillei ja Mycelium radicis silvestris alfa ja beeta mood lehisel EcM. Lecc scabrum, aurantiacum s.l., Tricholoma flavobrunneum, Amanita muscaria. Myc Rad silv g; Suillus, Xeroc badius, Mycelium radicis silvestris alfa, beeta,gamma,delta süntees männil.

Suillus granulatus, luteus, variegatus, Russ fragilis, Lact deliciosus, Cort mucosus, Tricholoma v

Piloderma fallax obs ja süntees

on eri liigid ITS ja mikrosatelliit DNA põhjal

, et ei oma Emh ega tsüstiide periidumis  
imine proovipõhistel andmetel lihtsate matemaatiliste funktsioonidega: 11 eri funktsiooni paljudele eri biol andmetele. Üldiselt parim LS meetod, järgn r

m sidemeid ; kõik võõrtolmeldajad olid generalistid v isegi supergeneralistid

Uromyces, Colletotrichum infektsioon: ülevaade

aiguti kattuvad Phialocephala liigid. ITS erinevus liigi sees <2 (3)%; liikide vahel märksa rohkem

elle klassi sekvensside jagamine liikidesse 98% sarnasuse põhjal ja nendele iseloomulikud geenijärjestused ITS1s ja ITS2s. 98% kr

Iycorrhiza 16: 33-41.

Cenoc, Mel bicolor, Hebeloma. Eri seened mõj erinevalt männi ja kuuse kasvu. Puud inokuleerit

ol väga vanad, ent neil on tihti kiirenenu evol plastiidi ger mükohet Afrothismia liigid on kitsalt spetsialiseerunud ühele Glomus li  
mükohet taimed võivad olla evol väga vanad, ent neil on tihti kiirenenu

of metagenomes. BMC Bioinform. 9:386.  
, P, K-vaene. Aldina mood paiguti kuni 47% rinnaspinnast

in ja selle mootmine Chimaphilast  
kasutamine, levik

Amanita muscaria

seentel

Armillaria spp Armillaria spp

cum: ei kasva tselluloosil, eelistal Cenoc

Wilcoxina-ektendoMR kuusk vs mänd; N-väetades rakusis kolonis väheneb. Domin vanades istandikes er 1-2 a



illus spp.

ok-d polüfüleet, parafüleet; eoste kuju seltsis v labiilne, viljakeha serv parem takson tunnus

isosüüüm kahjulik; puhastamiseks parim Sephalose kommertsmeetod (v aeglane), peaaegu samaväärne ränimaatriks

meetodeid ja võimalusi

metode: poletamise intensiivsusele ja taimkatte muutustele, kus havisid paljud spetsialist herbivoorid ja seetottu ka kiskjad

1 (sisald ECM liike)

alae Austraalias. Selle sõsarharu perek Faidherbia=Acacia subgen Aculeiferum sect Filicineae/Ingeae (perek Harvardia, Albizia jt.). Vaja teha mitu perek

atsiadi väh 3 eri haru. Phylloclineae AUS, eraldi.

giga Guyanast ja Jaapanist

coloba, Andira inermis (Papilionaceae), arv ka Hymenea courbaril (Caesalpinaceae). Uued liigid perek Boletus, Russula, Lactarius, Amanita, Phyllopo

sekotioidsete seente eri tunnused mükoriisamoodustajatel (closed pore hilu) sekotioidsete seente

xxx

is+Lact; 2) Albatrellus, Byssosporia, Plyporoletus; Mycolevis?, Leucogaster;

ta sügavamal, 3-6 cm mullakihis, samas kui maapealsetel enamasti varisel. Cenococcumi ja morchella sklerootsiume palju tuha sees (tek enne põlengut);  
Sebacina vermifera-laadseid seeni on leitud rohttaimede juurtest

ühedastelt liikidelt võib vaenlasi varsti juurde yulla

probleemid. Fingerprinting meetodid

alooliselt; tähtis osa suuremal liigitel kiirusel ja soojemas kiiruses, ka väljasuremised võivad erineda

mine biogeograafias hydrothermal vent koosluste rajoneerimises

Amanita mappa, A. muscaria, A. pantherina, A. rubescens, Suillus flavidus, Xeroc subtoment, E

se proovide arvu ning sekveneeritud kloonide arvu saamiseks keskkonnaproovist. Soovit kas n=4, sekv 47 või n=3 + 2 (sekv vähem + rarefaction)

nimaatriksi >jahvatamine, tsentrifuug 96-sele ning isoprop

lex, GeneClean, BSA

Chapman and Hall, 357-423.

tol. 137: 519-528.

Rhizopogon spp.

palju  
valimiskriteeriumid istandikesse  
palju  
palju

l. 58: 298-311.

l Ceratobasidium, Botryobasidium, Tulasnella. Membranomyces delectabile ja Clavulina mood haru; Cantharellus, Craterellus, Hydnum ja Sistotrema c  
võib kahtlustada: Leucopaxillus, Porpoloma (Trich), Catathelasma, Rhodocybe, Entoloma (Ent), Melanoleuca (F

use poolest, soovit kasutada suguk-spets thresholde. Indiivisisene var kuni 6% ja liigisisene kuni 19%. Mõnes perekonnas sõsar  
FLP tüüpidest-3 eriseltsi kottseeni

Terfezia: (ekt)endomükoriisa

uline nestedness taimedel

xxx

la, Auricularia, Dacrymyces) mitteperforeeritud parentsoomid; Tremellaceae, Ustilaginales -vesikulaarsed parentsoomid; Uredinales; Septobasidium -  
õitmine: spektrofotomeetria + ordinatsioonitehnikad; aktiivsus väga varieeruv, sõltus tugevasti täpsest substraatagarist Pleurotus ostreatus

oobuda ökol uuringutes, sest s o ebaõiglane ja mida suurem uurimus seda rängem on Bonf. Bonf ei arvesta kui mitu tulemust on läinud stat oluliseks

1 katteseemnetaimede radieerumise ja domineerimisega 60-100 MAT. Sipelgad tek palju varem -140 -170 MAT

nüümid, peremeesring

Alnicolatele. Peavad Becerra A. Escharioidese kirjeldust kahtlaseks. Seostub pms Salix spp-ga

ja. Hymenogaster ka polüfüleet kahe haruga. Alnicola bohemia ja arv lähedane Hymenogaster sp monokariootidena. . Alnicolal tek seos leppadega ises

angu piik soltub N hulgest vedelsöötmes. Mida rohkem, seda kiiremini tuleb piik, seda suuremad on müteelipallid ja seda rohkem Bjerkandera  
angu piik 8 päeval Bjerkandera  
i kui EcM-s. EcM-s ja EMH-s erinev N-ühendite konts. (EMH-s tunduvalt väikemad konts.). Uurea osatähtsus EMH-s v suur

RuLa, Inoc, ent soojenedes Tom, Inoc ja Russ BD väheneb. Kuivas tundras domin Tom, Cort, RuLa, Inoc, soojenedes Tom, Seb, Ir  
sidaaside levik ja fülogenees. Lagundajatel seentel; mõnedel arv muu funktsioon nagu H<sub>2</sub>O<sub>2</sub> inakt. MnP ja VP (versatile peroxidase)  
distance-decay kõver on vilets näitaja beeta ja gamma-BD-le. Tõus sültub dominantliikide agregeerumisest. Ka väike fraktsioon k

ntrifuug; 13C interpretatsioon: ilmselt metabolismiproduktide kaudu saavad oma osa ka teised bakterid  
ndi disain ja andmeanalüüs: replikatsioon, parameetiline ja mitteparameetiline dispersioonanalüüs, probleemid

Suillus

Terfezia

madal varieeruvus nii liikide sees kui vahel, mõni hüpervarieeruv kordusjrk, vahel homokaarionil Verticillium Verticillium

Tom sublil 8 ens aktiivsus sõltuvalt jaan vs mai; vs harvendusraie; vs declining puud. 3 seeneliiki. Kõik toimisid erinevalt, k

asias: uued liigid,

3 eri alamperekonnas ja sisaldavad mitmeid lähedasi liike. Mõni võib olla vale, sest peemes pole kindel

ja happeline pinnas isegi erinevamad. Liigirikkus Ameerikas suurem kui Alpides ja ligi 50% liikidest samad. Altais olemas mitmed Ameerika elemendid  
Cymbidium: mükohet arenes välja miksotroof eellastest

ne ökol analüüsidesse ja LK-sse. Koosluse str, network anal., vürdlev meetod

isvalt Austraaliast kohale tulnud Lepto; Pisolithus

I ECM puud; AM kui pole ECM puud; AM "ultramafic" pinnasel. Mõl liigil mõl MR tüübi kolonis v var

onaceae liigid Eperua ja Macrolobium ja Swartzia mood vaid AM. EcM taimi enim vaeses perioodiliselt kuivas/per üleujutatud liivapinnasega aladel (AI

rsity and distribution of macrofungi. Biodiv. Conserv. 16: 37-48.

ka muud stressorid Arizonas -herbiv, konkurents,

hemiparasiit parasiidiga EcM kol ol suurem, liigirikku  
termiidiseened, sipel

Hebeloma crustuliniforme

n mitteperf parentesoomid. Coltricia perennise kultiv. V raske, eri kollekts saadud tüved olid reostused

Cantharellus ja Amnita on Zambias tähtsal kohal

uudus. Seeni stimul eelkõige naabruses olevate EcM taimede ohtrus

ali mõõtmine: Moran's I ja Blomb K viletsad, Abouh Cmean ja Pageli lambda on head. Lambda annab ka MEAN EFFECT SIZE, e  
blike, sammalde, maksasammalde ja sõnajalgtaimede levikus. Sõnajalgtaimedel erinevalt teistest on leviku kauguse suhtes piirangud, sest varakult on va  
9: 481-492.

as, lakaas ECM vs non-ECM juurtel (P Laccaria laccata, L. amethystea

taksonoomia

ites and functional mating type genes. New Phytol. in press.

nakatamise ajalugu ja istikute toodang. Kvaliteedikriteeriumid

Laccaria, Hebeloma, Paxillus vs Tricholomopsis agaril; Hebeloma vs T. sümbioosis

Laccaria, Hebeloma, Pa

sh Madag ja Uus-Kaledoonia

atronile. Teeb vahet eri liikidel. Ühe liigi jaoks mitu proebet, sest heterosügootsus

ookeanisetete seened

veneerimine ja keskkonnaproovide tuvastamine: paljud kk-st saadud järjestused on identifitseeritud liikideks  
itud paigad, häiringute põhj keskkonna heterogeensus

al. Koordinaadid

s sõltus sellest, kas ta oli pandud kasvama terve (L amethystina, I lacera) või haige poosa (I lacera, S bovista) alla. Vanadest põõsastest eemal ECM ei te

onte Carlo

Hebeloma spp, Russula spp, Inocybe lacera, Scleroderma, Laccaria spp, Cenoc. Salix reinii idanditel, mis mood

ladophialophora, Exophiala ja Capronia sugulased) isol taimejuurtest

eerivatele männilistele konkurentsieelise  
väiksem liigisisene var); teistele protistidele CO1 ei pruugi sobida

lduse tõttu ja puuduvad stat meetodid

mida toetab ITS fülogen, on Jaapanis kõik levinud. Arv NE-Aasia on levikutsenter. N-Am lepa fossiilid mütseenist  
: Experiment Station Forest Service, U.S. Department of Agriculture, Portland, Ore, pp. 57-71.

mikroobide aktiivsus

kompostis seente ja l

eemilistel reaktsioonidel ja sellest tuleneval pinna muutustel. RNA (nii kogu kui ka in vitro transkr) tuvastamine (eelnevalt vaja keeta või lõhkuda sek-str

on väga tihedalt seotud;

distsantsi meetrikud: 1/NND ja 1/MPD

vs mitte-üüj mullas. Domin Cladosporium sp; seltsidest Sordariales; klassidest SordM ja DothideoM. Lisaks v palju EcM-seeni nii

si, saades toitaineid efektiivsemalt kõdust kätte ja vähendades leostumist

ia, Gilbertiodendron, Julbernardia, Microberlinia, Monopetalanthus, Tetraberlinia, Afzelia. EcM puude arv ei sõltu mulla P-st (erin Gartlan 1986). Puude

umist

phylla, Berlinia bracteosa. Enim mõj taimestikku saviosakeste osakaal. Anthonotaha, Cryptosepalum, Afzelia 2 spp reageerivad olul P muutustele mulla

Mycena, Marasmius

vede alt; evol lähedased peremeestaimed kippusid omama sarnasemaid kooslusi

Tricholoma tridentium: inokuleerimine

coding: sama. Liigid on endofüüsed ja erikoidset mükoriisat moodustavad, eriti sagedased põlengutel

Pisolithus, Paxillus

leerib männi juurdumist ja ECM teket Pisolithus, Paxillus  
e ens aktiivsus palju suurem leppade kui mändide all

erid, mis välistavad liikste rühmi. Kandseentel pole arvest heterobasidiomütsete, nõgiseeni ega roosteid. ITS4 derivaadid; koos ITS5 v ITS3-ga  
id liikide ja ka perek vahel

veeseened lehtedel: algu

mist!!!); EMH produktioon suurim keskel, kus lühikesed rohunid domin, sealh korrel see juurte biomassiga; AM prod suurim kõrgete rohundite juurre

rösvlev TG, Halwachs B, Hartmann M, Henricot B, Jayawardena R, Jumpponen A, Kauserud H, Koskela S, Kulik T, Liimatainen K, Lindahl BD, Lindne  
ole ühtlast kriteeriumi võimalik rakendada. Varieeruvus suurem liigisees vibur-ja AM-seentel. Ei sõltu seente elustiilist. Väidet liig  
ate kordamine emergencia abil, et tuvastada keskkonna proovidest EcM seeni

Inumiga teadaolevalt EcM, teises klaad Sistotrema alboluteum, S. Muscicola on EcM

palju valesti määratud v määranguta sekventse

E, Kõljalg U. 2012. Five simple guidelines for establishing basic authenticity and reliability of newly generated fungal ITS sequences. MycoKeys 4: 37-  
asets of fungal communities. New Phytol. 191: 314-318.

igh-throughput community assays and molecular ecology. Fung. Ecol. 3: 284-287.

nce databases and a software means for their detection and reorientation. Mycoscience, in press. DOI: 10.1007/s10267-010-0086-z.

äpsettl ei osata seletada, ent suurt rolli mängivad troopilised märgalad ja igikeltsa sulamine

isadani. Peab Tuberi mükoriisat Geastrumi omaks

, ent on mitmeid erandeid - kuni 7% (krüpt liigid?) ITS2 pikkus pms 300-530 bp

hiza 20: 459-471.

Tai rohelistelt orhideeldelt pms Tulasnella isolaadid kultiveerimise teel

kuusekändudele, mida o

Tricholoma saponaceum, equestre, sejunctum, flavobrunneum mood EcM kasel; sapon ja equest

Tricholomataceae: Lyophyllum f Tricholomataceae: Lyophyllum fumosum (arv fakult ja ka ektendo) ja Trich Tricholomataceae: L

mutatsioonid, genoomi ülesehitus. Aseks org püsijäämise eeldused ja vastavus seks vajalikkuse hüpoteesidele: Mülleri ratchet, Kondrashov hatchet,  
bresia liigid. Alborzi mägedes metsapiiri moodustab Quercus macranthera või Juniperus communis+Carpinus orientalis

Phlebopus bruchii ei

tajana, eriti konnektiivsust mõj.; seega kauem kooaevol kooslused on robustsemad häiringute suhtes

ARG sissetoodud metsaad ja hirved levitavad mändidega sissetoodud seeni ja soodust seega inv

tea tulemuse annab gpd. Lact fennoscandicus ja L. Deliciosus ei eristu ITS ja gpd põhjal, ent AFLP eristab hästi.

ide aktiivsus puhaskultuuris piimasöötmel: märgatavad liigisisised erinevused; enamik liike ja isolaate tootsid proteaase.

rmutant ECM-seened -efekti pole Hebeloma

excl

ellales (Trichomycetes) on sõsarrühmad

ceae),(Helvellaceae, Tuberaceae + Terfeziaceae)], Pezizaceae. Hüpogeilised vormid on tekkinud mitmeid kordi

rellal on mitteortoloogsed ITS sekvensid

TS, LSU, Eftu. ITS ja EF head ja suht kongruentsed

onnad täiesti läbiseigi; hetero/homotallism ja 1/mitmespoorne sporangium väga labiilsed tunnused

Lacc ameth, Hebeloma mesoph, Thel terr, Tomentella sp sünt Populus maximowiczii ga

: (sh Paulisebacina allantoida, Globulisebacina rolleyi, Helvellosebacina gen. Nov.

ctonia re-juvenatsioon (Thanatephorus on nüüd Rhizoctonia). Perek Ceratobasidium hõlmab ainult C. Calosporum. Rhizoctonia al  
liigipiir

jal väh 40 liiki - M. Elata ja esculenta rühmad on monofüleet. Suurim BS NE-Am ja Türgis. Enamik liike regionaalse levikuga, ka

igispets probed

**Gastrodia confusa: seotud** saproobse 4 Mycena liigiga  
Cymbidium spp: autotroofid on seoud Tulasnelladega, mixotr nii tulasr  
Epipactis helleborine JPN: rannikupopulatsioonis vaid Wilcoxina 2 spp  
**ARRAY seente identifits**

**Suillus grevillei, Inocybe kobayasii, Lact porninsis, Gomphidius maculatous EcM süntees. Seene**  
**Boletus sp**  
**Lyophyllum shimeji** **Lyophyllum shimeji võin**  
**Hebeloma spp** **Hebeloma spp võime pr**

Lecanorchis (MH Vanilloideae) - assots Lactarius spp, Russula spp, At

paha väljend. Soovit siiski kasutada andmetööstust ka mittereplitseerituse korral, sest see meeldib inimestele lugeda. Võimaluse korral siiski replitseerid  
lubatav, et ka subopt didsaini korral näitata eri tööstuste varieeruvust, er kus on tegu proov-alamproov probleemiga. Ei tunnista näivat psr. Peab Hurlbeti

f varieeruvus; kõik on kompleksliigid; DNA põhjal oleks võinud liike veel lahutada

**Heterobasidion annosum Heterobasidion anno**  
**Heterobasidion: hübriidi virulentsust männi suhtes ko**  
**hübriidide teke, ohtlikkus, eeldused**

uma genomis avastamine sekundaarstruktuuri ja energia järgi

1, sapro

**Suillus+Gomphidius**

**Suillus variegatus, Paxillus**  
**Paxillus, Suillus**

us, Paraberlinia, Tetraberlinia, Touabouate; ent Detarium ja Allophylus (Sapindaceae) mood AM

1 efektid. Tetraberlinia omastab EcM p; **Kamerunis inokpot: muld** Gnetumi alt vs Afzelia alt vs Amhersteae alt nii raiatud kui ürgses metsas Tetraberlinia

im troopikas

iine,

3 of plant roots expands the described molecular diversity of arbuscular mycorrhizal fungi. Mycorrhiza 23: 411-430.

s in the Boletales. Mycologia 102: 108-121.

ude kui sissetoodute all. Amanita muscaria kolonis ka natiivseid puid

7: 3620-3632.

**Orhideede mykoriisa isolaadid: fülogeneetiliselt vaid perekonnas Ceratobasidium: 1**  
**OrM: Ionopsis urticarioides (Ceratobasidium 1 klaad) on palju spetsiifilisem kui**

andid Cd vastu -glutatioon ja Cd kiire v **Paxillus**

üvedel kasutades Bayese meetodeid; Stat oluline co-occ võib tuleneda paljudest asjaoludest ja see püstitatab vaid edasisis ökol hüp  
rn tulemustega, mitmed DGGE bändid on kimäärsed artefaktid; v madal liigirikkus. Reassotsiatsioonikineetika võrdlus, diskussioon  
, ARDRA; DGGE, PLFA jpt)

perennise süntees; ei sisald ühtki testitu **Coltricia perennise süntees; ei sisald ühtki testitud laguensüümi (lakaasi, peroksidaasi, türosinaasi ega reageeri t**

**ektendo-Wilcoxina: 1-2 aastastel mändidel 50-100% Poola istandikes, osakaal suureneb uurea ja kivifosfaadi lis**

s Zimbabwe Brachystegia ja Burkea all

mitte graduuaalne, avaldades järskudes DNA muutustes hüüpeliselt /eriti seentel ja taimedel, vähem loomadel)  
te, radiatsioonide tuvastamine mol kella jr; arv mol kell on ühtlane; parsimoonia vs ML, vs baieesia; arv loomad olid divergeerunud ammu enne Kambrit

Tuber brumale, T. Melanosporum, T. Rufum -süntees ja kirjeldused Corylus, Quercus, Pinus; T. Rufumil ka P. S

Suillus spp sünt ja kirjeld 2 männiliigil

, Russ pectinatoides (nii abund kui freq)

P põhjal

Cenococcum

Piperia yadonii USAs on haruldane, ent kasvab eri ökosüüs, kus seostud

üksama liik ITS, EF-Tu ja beeta-Tub geenide põhjal

k, NY, USA. pp 221-249.

ksid sisald mitmeid krüptilisi liike, mis pole eristunud peremeestaime järgi. Nendel toimib hästi 97% ITS1 identsuspiir  
ndatud korduvalt ;16 suuremat rühma

Paxillus, rhizopogon jt

Paxillus, rhizopogon jt

wledge sharing. Nucl. Ac. Res. 39: D640–D646.

süntees ebatsugaal jt okaspuudel, sh Lyophyllum, Suillus, Rhizopogon, Amanita, Lactarius deliciosus moodustav

Rhizopogon roseolus

veestressi olukord: Rhizopogon

Lactarius deliciosus, L sanguifluus: Pinus pinaster, P sylvestris

e indeksid

eptorid

:kti kõrvalolevale taimele ei olnud. Muidu peale raadamist kontrollalal liigirikkus märgatavalt tõusis esimese 4 a jooksul

s ajaloolistel liigifondiga seotud põhjustel

rlo

310: 720-728.

:looni vahel suurem kui transgeenne efekt

sitedi mõõtmine; PD indeks laialt aktsept. Soovit kasutada uuringutes nii filoBD, traitBD kui tax BD. Nende suhestumine võimal  
isi edasiarendus tunnuste uurimiseks läbi fülogeneesi ja ruumilise str. Ei anna R2 väärtusi. Lagundavad nii ruumi kui ka fül vaid p

barcode, COI ja ITS ja LSU jt rühmaspetsiifiliselt

Armillaria: diploidne mütsee! Armillaria: diploidne m

m kui analoogsed pop-gen testid, k. one-tail testi; bootstrap on nõrgem kui permutatsioon

nerochaete 4 isostüümi kodeeritud erigeenide poolt; aktiivsus ei lange C-nälja puhul, ent langeb N limit puhul, kui lisada ribosoo Phanerochaete  
onistid. Arv on esinenud refuugiime läbi pleistotseeni jäätmiste. Üldiselt liigirikkus sisemaa poole väheneb, sest väheneb substraadi hulk  
ANOSIM analoog võimaldab kaasata mitmeid faktoreid ja interakts

mis, enim sõltub sademetest ja tuule kiirusest

s ei olenenud. Seejuures väiksemate alade liigiline koostis moodustas osa suuremate koostisest -nimelt kõige sagedasematest liikidest, mis on ka efektiiv

3.75m, ent puudub 7.5 m

kriitiline eoste arv. Kõik EcM seened levivad eostega, ent Russula, Amanita ja Cort ei koloniseeri seemikuid; Amanita, Russ ja Boletus

Pisolithus

ilmselt korjatud valedes kohtades); s.h. Phlebopus sudanicus=Phaeogyroporus portentosus, introduts Laccaria lateritia, Tricholoma pratense sp nov. Sap

b mandri-L-Am omaga enim

ybe, Saproobid: uued liigid

is) jaguneb kolmeks kindlaks klaadiks: 1. Cortinarius+Thaxterogaster+Hymenogaster pp + Protoglossum; 2. Hebeloma+Naucoria+Hymenogaster pp; 3. Cuphocybe, Rapacea

icina sp, Mycena, Hymenoscyphus. Boletus edulis v sage EcMna, ent EmHna sisuliselt puudus. Boletus edulist ei seostatud ühegi muu EcM seenega  
zites, Rapacea, Cuphocybe, Dermocybe. Defineerib klaadid. Klassikalised alamperek ei lange eriti kokku molekulaarsüs-ga  
eotud, paikn nii subgen Cortinarius kui Telmonia

'ordyla madagascariensis, Mildbraediendron excelsum (mõl. Aafr), Amburana cearensis (S-AM)

ndeemsus. Limiteeritud leviku poolt, vrd vihmametsaga esineb nishikonserveeritud er põuataluvuse suhtes

l tek varem, ca 5-15 MAT, enne kui hakkasid kuivad kooslused domineerima. See seletab ka mitmete liikide laia disjunktst levikut

rännanud. Fülogenees aitab hinnata bioomide vanust. Vihmametsades on nii iidseid kui ka modernseid radiatsioone, nooremates savannikooslustes S-An

b eri komplektidele v erinevalt, palju vale-negatiivseid (pms sekundaarstr tõttu; mida lühem sihtmärk, seda labiilesem 2nd str!!!); alati ühe valedel

myces on Tuberi keskel; Terfeziaceae on üsna kauge haru

ORM: Brasiilia epifütsetel ja maapealsetel orhideedel pms Ceratorhiza ja Epulorhi

ja Partial procrustes: suurem võimsus kui Mantel testil

Kasutades eri nullmudeleid, et välistada keskkonna ja ruumilist mõju; C-score ja T-score; kasutas liike, mis >5% proovides; koos

ga. Mets märksa rikkalikuma koosseisuga

Paxillus

Paxillus

Paxillus

Hebelomaga nakatatud pinnases on Pythiumi nakatumisvõ EcM Hebelomaga nakatatud pinnases on Pythiumi na

c väh 5 korral, arv. Humaria olek Genea sees on artefakt; EcM harusid 5-6

l ciljub, kasvab puidul

Laccaria, Hebeloma, 2 Rhizopogon sp

arv et mükoriisade mitmekesisus muudab seemikud tolerantsemaks eri keskkonningimustele

natics 19: 651-652.

BD mõõtmise üritus. Mõõdeti tohtu hulka tunnuseid, tehti neist 2-kaupa kombinatsioonid ning bootstrapi abil mõõdeti stat olulisust. Veidi parem kui li

ctarius sect Russula derivaadid, Gymnomyces ja Martellia on Russula foetens sõsarharud,

t, Iodophanus carneus) ja K2CO3 (stimul vilj Ascobolus denudatus, Lyophyllum gibberosum, L tyliicolor, Pez palustris -kõik niiskust armastavad seened  
 arv juurte parasiit), Peziza anthracina (seot lehtpuudega enne lõket), Pez echinospora, Pez praetervisa, Pez trachycarpa, Pholiota carbonaria, Rhizina -mf  
 hemisph, Pez endocarpoides; IV maksasammaldega assots seened; V Tricharina gilva, Pez violacea, Pyronema omphalodes, Inermisia carbonicola. An  
 ja Empetrumiga. Anthracobia spp sagedased põlenud metsas

mandrite morfoliike ei tohi käsitleda samana, sest hoolimata sageli esinevast bioloogilisest sobivusest on eri ökol ja geneet omadu  
 s kandseentele. Palju morf identseid liike, mis ei ristu, ent ka vastupidi. Sümpatrilisi mikroliike üllatavalt palju. Allopatrilistel liikidel pole olnud arv vaja

tezuelast

, Alnus glutinosa

obs Suillus cavipes, S. grevillei Larixil; Leccinum aurantiacum Populusel

rum, Gyroporus cyanescens obs EcM eri puudega ajades myc jälgi

Hydnotrya tulasnei + Larix, Suillus caviiper + Larix; Russula + Betula: kirjeldused; Tuber melanosporum

it apoteetsiumidega seltsid: ülevaade, morf tunnused, veidi ökoloogiast -väidavad, et ökoloogiast on vähe teada, sest seda pole spets uuritud ja toetutakse

jakeha periidiumi rakkude morf on sarnane ja sarnane ka nende mükoriisale

liigid: igale liigile cyt oksidaas I ja cyt b geenile 2 probet (21-27 nu). Keskpärane tulemus; probleemid pseudogeenidega, valepositiivsetega (intens küll  
 Phlebopus spongiosus - mood 'EcM' pomeloga nii istanduses kui sünteesides - paks mantel ja pa

M puudel üldiselt madalam pH kui AM puudel risosf vrd bulk soil, ent see võib olla okaspuude" efekt. Risosf pH korrel tugevasti vihmausside arvukuse  
 ii orgC kui ka orgN. Tänu kõrgemale kvaliteedile laguneb juurtekõdu mullas kiiremini. Fenoolide rohkus väheneb CO2 suurema ht  
 i; mitmed morfoliigid on liigikompleksid

› Ratio - hea tunnus suhtelise mõju uurimiseks

Cenococcum

Cenococcum

lignicola iseloomustus. Illustreeritud viljumass tugevasti segamädanikuga lagundatud kuusekännus

itseel okaspuu lagupuidul või paksus huumuskihis

10. Portland, Oregon: US Dept. Agriculture, Forest Service, Pacific Northwest Research Satation. 161 p.

liike. Osa liike viljub 1 a peale põlengut, teised looduslikes metsades ja need on Dahlströmi järgi ka MR.

Morchella: kasvukoh

Tuber melanosporum

› taimede eellased koloniseerisid maismaad koos. Nimet. 'oomycetes'

proc. Hüpot, et PNGs Nothofagus ja Fagaceae taastavad EcM kontakte (lk 144); Pliotseenis on Fagaceae, Betulaceae ja Salicaceae liikunud ECU, Arg,  
 OL-analoog, puude visualiseerimine

eeneni Aafrika oli 15\* lõunas vrd praegusega. Siis soe ja niiske, miotseenis külm ja kuiv -vihmametsad üksikutes refuugiumites, mis kahandas BDd. Plic

Tuber melanosporum

sed taimsed lülid ühe rühma jaoks ei ole kriitilised teisele tarbijate rühmale.



ce ajal: 33% geenidest Laccarial 2x ülesreguleeritud

Moserella kirjeldus: viljakehad kasvavad välja otse E

1  
eta-diversiteet. Töötab kui 40% linkidest on teada

valgemädanikutekitajad

Tuber borchii

on to biotic and abiotic variables at the global scale. New Phytol. 198: 1239–1249.

gavuti, d13C sama mullaprofiilis; vt vajaliku mat hulk!

nid

Lactarius rufus

nii patogeene, Orm sümbionte kui saproobe. Kõikide AG-gruppide fü Rhizoctonia AG-6 ja AG-12 Rhizoctonia AG-6 ja AG-12 sisald nii patogeene, Orr

Sampling effect vaid taimtoidulistele nematoodidele.

Vanilla 2 liiki on seotud nii Ceratobasidiumi kui Tulasnellaga. Erinevu

etodid annavad rohkem tulemusi kui fülogeneesi-põhised; MEGAN teeb vähim vigu; fülogeneesi-põhised on parimad kui fragment  
tseen on evol-puul Saccharomycotina ja Taphrinomycotina vahepeal  
ri tulemusi. EI korjatud resupinaate!

parim valimaks fülogeneesiaanal modelit

Omadused: x2 test, Monte Carlo permutatsioonid, hierarhiline kladistika

ning programmidest. Retikulaarne fülogenees

senf fasta ja output phylip vms

in Cotoneaster jt õunviljalised

põhjapoolet; peremehe fülogen ja biogeo mõjud parasiitidele

1 ja Nematoda - neil rühmadel arv biol erinevused, mis ei võimalda mõnel peremehi vahetada). Ei uuritud parasiitide fü BD

õrgult võttes arvesse kk-faktoreid; paneb haruldased ja vigased OTUd kokku samast keskkonnast pärit sarnaste proovidega, ent mit  
Cephalanthera spp heterotroofsus suurem kui valgust vähem NB!!! Võr

läbi palju toitaineid -keystone liigid

parasiitsete taimede mõju peremeestaimedele, kooslus

rikka kõdu olemasolu kiirendab toitainete tsirkul mullas

hemiparasiidid: kõrgem toitainete konts tänu suurema

BIOLOG plaat seente ja

nedele

nükoriisat maha, võimaldades jätkuvat invas.

fitness

väärsus. Am seente ITS identne Eur omadega. L-Aafr-s tamme ja haava istandustes. On teateid A phalloidese seotusest Myrtaceae liikidega NZL-s

as on suurem f-naalne mitmekesisus kui mitteklasterdunud kooslustes hoolimata sellest, et f-naalsed variaablid on fü konserveerun  
i3-1273.

id EcM ensüümimõõtmistele: vaid vitaalseid tippe võib kasutada; parim säilitusviis +4°C mullakamakates

Alnirhiza cystidiobrunnea:

oplate system. J. Microbiol. Meth. 58: 233–241.

Tomentella stuposa lepal on hästi kultiveeritav

endofütidid perekondade

aliki katsedisain on eeldus kõigile mikrobiol uuringutele ja järeldestele. Halba teadust ei tohiks avaldada

viirus: Puccinia sorghi ja dsr! Puccinia sorghi ja dsrN/

ine paariviisilise distantsi põhjal arvutuslikult

amik taimi on tek troopikas ja seetõttu nendes rühmades troopika suurem mitmekesisus, teistel mujal  
i jätumine: väiksem väljasuremine; suurem võimalus diversifitseeruda. Ka meri madalam ja veepinna kõikumine ulatuslikum  
korrel eri rühmadel tugevasti. Peamiselt korreleerus keskm temp ja PET, sademed ja actual evapotransp. Ilmselt kujundab seda ei

idified and limed plots. Plant Soil 199: mikroseened ECM satelliitised: T. viride happelisel pinnas mikroseened ECM satelliitise mikroseened ECM sate

neerimine (log2) ja normaliseerimine (lowess, erinevad plottimised)

ia. Kooslus ega BD ei korrel geogr, peremehe ega kliimaatiliste muutujatega  
ektüivsem ja kaugeleulatavam risomorf: Cortinarius collinitus, Cenococcum

erek tase) erinevused aastati ja kasvukohati ning EcM vs EmH

Laccaria bicolor, Hebeloma  
Hebeloma, Laccaria

sse, raskusgradientfuugimine, spetsiliikide määramine bakteritel, hilisem funktsionalgeenide otsing

Kluwer Academic Publishers, Dordrecht, The Netherlands. p. 1-27.  
orreleerub primaarproduktiooniga. Termin "functional biogeography"  
:ga

väheneb hilistes st. kuna toitained ammenduvad;  
ia, Aurantioporus jms

uni 50 m-ni  
I testi mikroobiökoloogias: ülevaade, kasutussoovitused  
MAT fossiilide kalibreeringu järgi matK ja rbcL põhjal.

arvestamine ökoloogias. Proge SAM  
õrge taust, piikide pikkuse kvantit arvestamine, kerge varieeruvus replikaatide seas, geeli mõõtmist ei replitseeritud, regiooni pi bakterite (IGS) ja seente

ned toodavad happed mitte AB: puhver paljud

OrM parasitismi valguses ülevaade

OrM: seemnepaki meetod: nailonitükk+seemned filmklapi vahel

OrM: Tipularia discolor: seemned idanevad pea eranditult lagupuidus: vaatlus-ja m

OrM: Tipularia discolor: 1a taimelt lagupuidus eraldati moniloidsete rakkudeg (cf'

vs ECM seened puhask

ned BIN koodid

mitmed

I mõnevõrra omastada N kiitunist ja mu CWD: püstitavad olulised küsimused CWD funktsiooni kohta

maksasammaldel: Southbya, maksasammaldel: Southbya, Cryptothallus jmt

estunud näidata radiooakt C liikumist Salixist Pyrola rotundifoliasse. Arv et Pyrolatel pole MR olemasolu obligaatne

nõgudes alati Salixi läheduses -arv konl Pyrola rotundif ssp maritima, Monotropa: esinevad luidete vahel nõgudes alati Salixi läheduses -arv konkreetne :

ust, seal on tihti ka muid potentsiaalselt EcM puud: Arillastrum, Gymnostoma, Leptospermum  
iosa ja Tom subliil

mükoparasiitsed makroseened: Squamanita, Clitocybe

vaid 1 proov ja DGGE

irinal, noodulitega on lood vastupidi. Noodulite teke sõltub paljuski mulla P sisaldusest  
12% AM kolonis.

süntees paljude liikidega, sh. Elaphomyces, Tylophilus, Gautieria, Gummiglobus, Mesophellia, Nothocastoreum, '

ged ja pruunid tüübid orgaanika vahel.  
firbeliae), Calogyne (Goodeniaceae)

ora ise kasvas paremini nii eraldi kui k Laccaria, Thelephora  
ie soontaimi!), selle järgi kand-ja kottseente lahkumine kalibr 620-600 mlj a t  
cventsid ei kattu

Väikestelt Antillidelt ja Mikroneesiast

Tek AM-eellastest. Paraglomus (((((Archaeospora+Geosiphon)Glomus A+B) Scutellospora-Gigaspora) Pacispora)Diversispora+Acaulospora)

Lactarius, Russula, Amanita

esist ja erinevate gruppide kirjeldamine

AUS-sse introductseeritud puudel samad endof mis N-Am samal liigil

Phaeocollybia arvatakse Phaeocollybia arvata

Coprinus Petri tassil mo

Neolecta tundub olema juurepatogeen, lõhub j

xxx turbasamblal ja laar

parasiitsed varre-endofüüdid

lüsipoorsed. LSU + SSU + RPB2; 89 taksonit; Pezizales euaskomütseetide basaalne, ent parafüleetiline [arv long branch attr]; v apljudele kõrgematele t  
Elaphomycest seostatakse kuuse juurtega, peetakse parasiidiks

ei saadud tuvastada; PCR produkti hulga tuvastuslävi 2% koguhulgast!!!  
-818.

n, ent peale seemne-toiduvarude kasutamist palju kiirem kui suureseemnelistel puudel

undajad: põhjalik ülevaade

ligniini lagundamine: see

aineid (suurendab) ning AM-seente kooslusi Aafrikas

Oribatida kehapiina

. fossiilide põhj väh 85 MAT, fülogeni järgi u 140 MAT, fossiile leidub ka Euroopas ja Kapimaal. Seemned ei levi hästi. Arv kauglevinud Uus-Kaledooni

mation Coefficient - põhine analüüs, et tuvastada seoseid suurtest andmemassiividest - eriti kasutatav nn co-existence analüüsides

adel fülogneetiline signaal tugevam; ; lähedaste liikide roll networkis on sarnane

illidel ja kultuuris Cladonia talluse juures mittester gümnoteetsiume, mis sarn teleomorfse perek Myxotrichium omadele. Viitab O maiusele kui kiirele or  
oma määramata) nimetati Phialocephala dimorphosporaks  
liike

suur viljakehade levik ja liigirikkus lagupuidust 0-1 m eemal, mõned eelistasid gäppe, mõned Arbutuse või Quercuse tüve lähedust; Sama liigi poolt moc

a; AM reeglina ei fasiliteeri ega inhibeeri invas, sest on kõikjal ja mittespets.; Aktinoriissetele ja EcM taimedel nt Männil jt vastup

tohal EcM puud

tentsus kohalikele seen- ja putukkahjuritele. Soovit pikemas perspektiivis asendada vähem invasiivsete liikidega või mitteviljuvate  
naceae-Pomaderrae (sh Pomaderris, Siegfriedia, Cryptandria, Trymalium, Spyridium) mood monofüleetilise rühma, mille sõsar perek on Ceanothus

Laccaria, Scleroderma, Cantharellula

Boletus parasiticus!!!, Astraeus, Scleroderma spp, Thelephora sünt. Ja kirjeldused Langermannia gigantea, Lygo  
vs Actinomycetes Petri tassil

ic; edasilevik

is sõltub enim suguk. Ökoloogilisest paindlikkusest (levimisvormid, puitumine, temp taluvus)

ajalool faktoritest. Väiksema BD alale on kergem minna, ekstinkts minim; ökoloogiline e f-naalne BD on suurem suurematel aladel. Kiire evolutsioneer . Enim mõjutavad liigiirikkust ajalool ja geogr protsessid; vaja oleks analüüsidesse kaasata fülogeneetilised seosed, pop-struktuur j

egametsas ilma EcM puudeta

Limacella spp. NZL: Po

id eriti Caesalpiniaceaele (sh paljud EcM liigid)

Rhizopogon, Suillus, Pisolithus, Thelephora

na ja Agaricus sp stimul männil dihhoto Amanita muscaria, A pantherina, Lactarius deliciosus Suillus collinitus

Collybia dryophila tapab mää Collybia dryophila tapab

:8.

vaid POD-ga seeni t

ülevaade

ruderaalid

Lact subdulcis prod. 100x rohkem kui Xerocomus väitingimustes

iateks

eksootiliste patogeenset

x sees. Sõsarliik Carex pauciflora (sect unciniaefomes)

Thanatephorus ega seostu orhideedega nagu väidetud CurrahEtA11987

iv pannaldeta hüüfod!

terokandseened Korupis

atsiooni korral

ne autokorr 54 m UNIFRAC baasil; OTU-põhiselt on kõik proovid üksteisest väga erinevad

a Alnicola - paljud liigid spetsiifilised lepa alamperekonka kaupa. Kõik üleminekud on toimunud A. viridisele, aga mitte viridiselt; viidi-sisene polümorfism ja liikide-vah indelid, mis segavad align;

ipi fülogeneesikäsitluse lühülevaade. LINK programmile

2.

na genoomis laiali. Tek ebavõrdse krossingoveri tulemusena ja võivad muut pseudogeenideks. Koopiad võivad olla üsna erineva järjestusega.

: suur erinevus, ebapiisav proovivõtt

kottseened troopikas ter

Pisolithus

Pisolithus tinctorius

xxx

astamiseks. EI illustr.

üinoh aligneerija

saproobid, väga tihti juurtel; hüüfid ühe- või multituumsed

**Piloderma fallax, Hebeloma crustuliniforme**  
eelistavad kasvada ja sünteesivad oksa **Cortinarius glaucopus, Piloderma spp, Suillus bovinus, Paxillus involutus**

**Mycena galopus**

del mitte-häiritud aladelt ruderaale välja tõrjuma. Häiringud vahelduvad ajas ja ruumis. Kui on laiguisene kooseksist, peab olema ajalised erinevused (n

**Taimaal mükoheet orhideed seostuvad paljude EcM seentega. Aphyllor**  
**Epipogium aphyllum: FRA, RUS, JPN - Inocybe spp, vaid ühes kohas l**

al Tuber magnatumile viljakehade baas Tuber magnatum  
complex. Mycorrhiza 21: 17-25.  
723-735.

**Paxillus involutus**

plementaarid; tulemused arusaamatu

isondis, Sarcodon ja Russula cyanoxantha A ja B horisondis

a. Samas eri mäed on eraldatud, võimaldades allopatr. Liigiteket

l. Artocarp'i Taimaalt on lähimad sugulased Craterocollale Sebaciales sseeltsist  
palju juhuslikke, ei tehta vahet

de kaupa märksa suuremad erinevused

on podokarpuseliste juuremügarates

elikult annot. Annoteerimata sekventsides 58% väidet avaldamata; 38% oli peremees, 55% isolats-allikas  
; evol. Stabiilsed tunnused on ka eoste kuju, pH eelistus, lehtpuude vs okaspuude eelistus, cys seinapaksus

14 MA vana

egadel varakriidist (Hygr) kuni paleotseenini. LSU või ITS põhjal. Erinev evol-kiirus markergeenil rühmade kaupa

põhjal: Geenipangas domin Russ-Lact ja Cort ja Tom-Thel identifitseerimata keskkonnasekventsids. Inocybe mõnel liigil ITS v vari

**Thelephora**

**Thelephora**

id lagupuuduga või põlenud puuduga

**Hebeloma radicans jms korjustel**

rhizopogone

uri; Melamp ei takistanud EcM teket

**Suilluse ja Boletinuse stünt. EcM Larix laricina**

ae. Konkreetseid sõsarliike pole. Kõrvalartiklis sõsar perek. Spondianthus Aafrikas

onoideae + Ruprechtia-Triplaris

**xxx**

in tuumade olemasolu AM eostes

a hindamine mol kella baasil: 18S (180 MA) ja rbcL annavad eri tulemuse. rbcL 1+2 (200 MA) vs 3. (90 MA) koodon annavad erineva tulemuse. Kõil

p vs Bayesia meetodid; visualiseerimine, VIITED

enide mittekonvergensus, aeg, lahendused, taxa sampling

nolekulaarse evol eri kiiruste arvesse võtmine

18S rDNA kanti membraanile eraldi ja hübridiseeriti eraldi; vale-positiivseid pole, vale-negatiivseid ca 25%

ite nitraadi reduktaas: NH<sub>4</sub> juuresolek (Russula, Lactarius, Gymnoboletus, Amanita

1 -->NE-Am vahel. Paleotseenis kasutasid loomad pms transatlantilist Thulea silda >50 MAT. Beringi sild varajases faasis oli vähetähtis, ent oluline pea ja hinnatud

meriühmad. Taimedel domin levik (AUS, NZL) S-Am; loomadel (SS-Am, AUS) NZL jm. Mõjutada võisid läänetuuled ja ürgsed saarestikud

eremehe spets pole

EcM Scleroderma spp vs Isoberlinia, A Burkina Faso: Isoberlinia, Brachystegia, Uapaca, Monotes: pms Boletaceae, Russulaceae, Sclerodermataceae, E sümbioos vs mutualism: terminoloogia, teaduse areng

EMS Microbiol. Ecol. 31: 127-141.

taminated soil. FEMS Microbiol. Ecol. Suillus bovinus, Paxillus

e olemasolust, saproobidel kliimast ja geogr kaugusest

! liike, millest osadel kitsas peremees-ring, teistel lai

ühmad

Cortinarius sp

Amanita

i on Geopora spp; Pic carthus = Leucangium; P. Pachyascus = Imaia gigantea;

rk külgiuured ECM, paks mantel, norm HN, rakusis kolonis pole

Ceratobas sp.

-kevade ning suve vahel. Molekulaarne diversiteet. Ka ACE ja Chao1 indeksid

mikroseened vanal klaasivär mikroseened vanal klaas  
uued kottseente harud tt

ats kambriumis

Orchise liikide OrM sümbiondid vs nende hübriidi sümbiondid: viimas

Laccaria, Suillus

patogeenid: Fusarium, jt

ine mõjutaja taimede biomass, maa all mitte; Efekt kõrgematele troofilistele rühmadele läbi otseste toiduallikate.

ristusid toidu ja elupaiga järgi

et katabolismi, vähendavad tegelikku katabolismi, endogeilised vähendavad mikroobide biomassi, epigeilised suurendavad

si sõltu toitumiseelistustest; vilets toksine tootvatel ja funktsionaalse melaniini geeniga Aspergilluse tüvel. Segadieedil suurim reprod saavutus arv eri re

lelites seostub MAT ja MAT-Cvga; kvantitatiivne modulaarsus on palju parem mõõde kui binaarne modulaarsus

Usid sekvenside omavah distantisi põhjal Jukes-Cantori algoritmi järgi, põhinedes eelnevatel aligneeringutel. Võimaldab OTUsid defineerida erinevatel leivad sekvensi raamatukogusid omavah geneetilise distantisi järgi. Kiire ja efektiivne versioon. C++ keeles UNIX masinal, sisseehitatud mitmese võrdlt de võrdlus. Erinevatel eri eesmärk: HOMOVA - molekulaarse erisuse homogeensuse test (nt agregeerituse korral); AMOVA - osak uringud vaja replitseerida. Lugeda kas kindel arv isendeid või st ploti suurus + rarefaction.

pringer, Berlin, 21-40.

ar gen var; lühikesed praimerid, madal annealing temp 360

mentella pole eriti efektiivne

st läbi seene, mitte eri N ühendite omastamisest. Amino-happeid võeti üles väga vähe, kuigi need olid domineeriv ühend mullas ku

it: Sanger SSU peal annab ökoloogiliselt kohesiivsemaid tulemusi complete linkage ja viletsamaid single linkage. "Habitat" aspekt

vate indeksite võrdlus

lestad: eri liigid eelistavad eri seeneliike. Vahet pole EcM, lestad: eri liigid eelistavad er lestad: eri liigid eelistavad: cetidae ja Pleosporomycetidae (sh Cenoc, Ord inc.sedis - sõsarrühm Glonium). Patogeenid tek saproobidest, magevee ja ookeaniha e kokkuviiimine INSDs \ 109:6241-6246.

imad RPB2 ja RPB1; liheniseerumine tek 4-7 korral ja kadunud 1-2 korda; VK tek 2 korral (2. Neolecta); Laboulbeniomycetes or classiülesed ühikuta taksonid

iguezia (L-Am); Dicymbe-Polystemonanthus). Aldina on lähedane perek Cordyla (Aafr -L-Am disjunks.). Suguk. On tek arv paleotseenis kuivade hõre: i DNA

Piloderma fallax

ofüüdid on rikkad sekundaarsete metabolismiainetes poolest. Taimedes patogeenid induts väiksemat metaboliitide hulka kui endo

t Pezicula sekundaarmetaboliidid. Mida patogeensem on seen, seda lühem on latentsusperiood

† peremeestaimedel, ent 10 promilli vaikselt kui CAM Taimedel

Geosiphon

iversity; electronic version freely available at www.amf-phylogeny.com.

liigi uued genotüübid võivad kohalikud välja tõrjuda või geneet modif. Invas seeneliikide identif on v keeruline sest 1 raske identif morf liigikonts jr, loo t toimub ress-de vahetus. Suureneb mõlema fitness. Eeldus: org-del on erinevad ress-vajadused ja väiksemadki erin ress omastamises, madal petmine, tr:

lifitseeritud kui kogu-16S rDNA hübriidiseerimine (min limiit 10e7 rakku/g), head tulemused + FISH

† eri 16S rDNA alleeli. Mõni domään rDNAs varieeruvad kui teine; eri praimeritega saab DNA segust kätte eri liigid

† hulk on DGGE ja TGGEs

taksonoomia  
tud erinevused

organiseerimise ja omavahelise võrdluse programm. Nõuab sekventsilede ühtlast pikkust ja head kvaliteeti

id **Glomus mossega**

, vähem kandseened. Morfoloogia, sellepõhine taksonoomia + esimesed molekulaarsed parandused. Osadel kotteene rühmadel unikaalsed anamorfid. N

ropropagatsioon: juurdumiseks IBA parim (10 min 1/1000 IBA parim)

lumine kooslusse muudab oluliselt mikroobide ensümaatilist profiili

lepa lisandumine kooslu

ottu

Sebacina spp

Laccaria bicolor

Epipactis microphylla: Tuber spp, Pezizales spp, Russula sp, Hysterangium spp, Sc

al hulgas samblikud (polifüleetiline)

Laccaria

Laccaria

www: mükoheterotroofid ja mükoheterotroofid ja miksotroofid: ülevaade: EcM võrgustikud -nendega seotus, s

miksotroofsed taimed: arv. C-toitumine on tek N ja P toitumise käigus

Sebacina spp orhideedel

Leccinum duriusculum

d kui maksasamblad. Arv assots tek konvergenselt

maksasammaldes endofüütsed seened mood palju erinevaid struktuure. Tõenäolise

e suurem niiskes kui kuivas tundras. Soojenedes patogeenide ja saproobide BD kasv kliimamuutused tundras kliimamuutused tunc

Rhizoctonia: parasiit vs sümbiont

akkas, PPO, isotsüümanaliütis

Suillus

Suillus, Paxillus

Laccaria, hebeloma, Paxillus

parasiitne Rhizoctonia

viljakehade levik; vs EC

eridega

MAT! N ja pH vähemolulised, ent mudelis sees

ite tuvastamiseks kasutatavate head ja vead. Oligote pikkuse ja täpsuse probleem. Arv et väga laiaskaalalist uurimust ei saa arraydega teha. RNA vs DNA  
egelikult redundantseid liike pole. Suurt liigirikkkust võib stimul omnivooria lisaks heterogeensusele ja ress rohkusele ja multidimer

Suillus, Hebeloma

composition. Symbiosis 61: 1-12.

Tuber aestivum Soomes

OrM: troopilistel rohelistel orhideedel isoleeriti juure endofüüdid. Nendeks pms Tu

stus; Himaalajas ka Cort ja Hygroph. MPs Cantharellus tropicalis assots Dendrocalamus bambusega

eae AG-kaupa. Ceratobasidiumil AG-sisene variatsioon tavaliselt <7% ITSis

tephorus ja Waitea teleomorfid): geenipanga ITS sekvenside meta-analüüs. Õigem taksonoomias kasutada mitte AG-sid vaid AG subgrupe. Orhideede

Tomentella sp Pisonialt: Nitraadi reduktaasia akt v väike nagu Tylosporal, mis on väiksem kui enamus EcM seentel, Pisolithusel kõrge. Kõik tootsid glu  
Pisonia grandis mükobiont; VIITED

Tuber melanosporum  
vs saprotroofid

vs ECM-seened

gal hosts. Mol. Ecol. 19: 3008-3017.

Goodyera: enamik assots. Ceratobasidiumiga: enamik liike seotud vaid  
Eestis tuhamägadel vs looduses: Orchis militaris -Tulasnella 1 spp kõik  
Cyripedium spp orhideed Eestis ja USAs -kõik seotud va Cyripediumil palju Phi

pealiskaudne tumepõlv Tomentella Boletus edulis, Xerocomus subtomentosus, Suillus luteus, Amanita muscaria , Paxillus involutus  
suureneb õhu segunemine madalamates atmosfäärikihtides  
a Põhja-Aafrikas;

veget. Paljundamine juurutades: 250 ug IBA opt; parim substraat peenliiv v saepuru; suurem lehepind on parem

valge-vs pruunmädaniku seened. Selget vahet pole. Erilikeid väga erinev. Va-mä seentel oksalaadi dekarboksülaas, mis ei lase suurtes kogustes tekkida  
: orchid. Mycorrhiza 19: 525-534.

Cyripedium JPN: Tulasnella 2 spp, mis pole lähedased

Cenococcum sp. Ülevaade, viited

erlin, pp. 107-132.

lehe-endofüütide peamin lehe-endofüütide pe

Ericae spp nov- CAN, kumbki ei mood ErM

suga -> Betula; vastavalt sellele, kellele on anda! Metaanalüüs valguse mõju kohta MH ja autotr taimedel ei andnud olulist valguse e

palju;juhulikud,ei tehta vahet

133-164.

Paxillus

pogon

J, ITS, LSU tüüpi. Enamus unikaalsed punktutatsioonid, mis üle geenide juhul jaotunud. Eriti domin A>G transitsioon. ILMSELT  
Amanita (15); Russula (1), Coltricia (1), Albatrellus(1 Pinus indig)

le analüüs

Pisolithus, Scleroderma

naper algul märtsi II poolel. Koosseis arv ujutuste stressi tõttu väga vaene -vaid Amanitaceae, Russulaceae ja Boletaceae. Seened saavad arv hapnikku r  
nth 4; Gomphus 1 Ramaria 2; Sarcodon 1; Thelephora 1; Scutigera 1; Phyllobolites (Pax; EcM?) 1, Neopax (Pax, EcM?) 1; Gyropon  
icuman + Tierra del Fuego: Nothofagus, Alnus, Salix, sissetoodud lehtpuud Populus, Tilia. Lepal Alnicola 1 sp, Inocybe 1; Russula

sh end. Tylopilus affinis), Phaeogyroporus (nüüd Phlebopus) gen nov; Callistosporium (puidult)  
iivapinnaselt

virens, Lact delic.; La Plata regiooni kohalikel puudel Alnicola devia, Paxillus argentinus; pampades saproobid ja Amanita ameghinoi; Põhja-Arg: Gyropon

mekesine Paxillaceae: nii EcM kui sapro vormid kogu kontinendil. Linderomyces, Gyrodon, Gyrodon rompelii (sapro või seotud Inga (Caesalp) või Allo  
ole -esinevad vaid männiistandikes: Tricholoma spp, Russula spp, Hebeloma, Inocybe, Lact deliciosus

liikide kirjeldused



vice: Washington USA. pp. 204-215.

yella sp, Laccaria tetraspora ja saproobsed kandseened. Puhtas Austrocedruse metsas Nothofaguseta v palju saproobe, ent ka Clavulina spp, Clavulinops eae), arv EcM ja lähedane Neopaxillusele. Kasvab Manause kandis liivapinnasel

akehi leiti. Fabales ja Salix humboldtiana olid mittemükoriissed nendes kooslustes. Arv et need EcM seeneperek liigid on saproobid. Arv seened adaptee netum, Psychotria võrreldes terra firme lateriitmullaga (savi). Kirjeldused ebapädevad;

okstel või lagupuidul, meenut Marasmiusi; Eriti Lact igapoensist peetakse parasiidiks puudel, kerg **Lactarius sect panuoidei:** kasvavad okstel või lagupui

**Phlebopus tropicus elab** koos juurte lehetäidega tsitrusel

on: bakterite ning AMF kooslused korrel taimekooslusega, ent bakterite ja AMF koosluste korrelatsiooni tingib pH. Partial Protest

**ookeanisetete seened**

: vs katvus graafikud usalduspiiridega; proge libshuff (perl), proovide (kloonide) arvu determinerimine

süümid Põhja- ja Kesk-Am-s: pseudorepl.; peamine mõjutaja pH, mikroobide limiteerivad faktorid;

**Tuber borchii**

üdmisprobed; 16S PCR-rDNA; kogu rRNA, kogu rRNA fragmenteeritult; chaperoni pole vaja PCR-DNAle, ent vaja pikale 16S rRNA ahelale sek str ja

ol. 65: 2614–2621.

leidmise probleemid

sekotoidsete viljakehadega, kasvab eluspuu jalamil, ehituselt lähedane Oudemansiellale nii pseudoriisa kui VK ehituse poolest.

ilade vah erinevus põlenguelsel aastal; põletamine ei tõstnud esile ühtki seeneliiki ega gruppi

**Piloderma**

**Piloderma vs CWD**

kanarbikulistel

nud VK vs EcM mittevastavuse arusaama

ilses skaalas, keskm 0.74% (kuni 2,85%) liigiti. Cenoc isolaate saab ITS ja LSU sekvenside järgi 3 krüpt rühma paigutada. 7% liikidel esines polümorf

eeriv perek Mortierellales liike

[

**Boletus rubropunctus** mood tuberk EcM

atrellus hulka, sõsar A. skamanius

perekonnad. Genea sisaldab palju krüptilisi liike Californias. Liigisisesed erinevused kuni 1.0%, eri paikades <2%; liikide vahel alates 3.8%

pets praimerid

emalt kui rohttaimed

24.

**Diuris AUS: Tulasnella v** kitsad tühmad. Loodusesse viidud inokuleerit

laselt surevad dipterokarbid tulenevad EcM seente suremisest peale raiet.

robial community composition. FEMS Microbiol. Ecol. 75: 291–303.

imine lihtsate matemaatiliste funktsioonidega: log-fn parim

isosyymi transkriptsioon Pleurotuses: stimul kõrge N, C, Mn, eriti aga Cu ja aromaatsed ühendid, transkriptsioon lakkab pH<5 Pleurotus sajor-caju

ats hindamise kriteeriumid: ; sõltub geogr kauguse skaalast; kehamassi kasvades on lokaalsel skaalal autokorr väiksem; pakuvad vi

pooldest divergeerunud erineva kiirusega; kalibreerimine

AUS: enamus liike assots Tulasnella, Serendipita ja Ceratobas; pealse C

ieeruv Agaricus bisporus eri tüvedel

domin ECM

M(DothideoM((LecanoroM+Geoglossaceae+LichinoM)(LeotioM+SordM)))

aeae Dothideomyces incertae sedis

kaotamine: arv mitmekordselt. Pooldab 60 MAT suguk teket kuivades tingimustes (Lavin 2005). Arv noodulid tek üsna varases evol-staadiumis paleoge

lest kasvab CWDI

Eperua, Peltogyne, Andira, Dalbergia (Leguminosae), Syzygium (Myrtaceae), Sapotaceae, Lueheopsis (Tiliaceae) mood AM

A: BD, BD näitajate modelleerimine, proovisuurus, kogu liigirikkus, võrdlus, usalduspiirid

is))). Juglans levinud P-Am, Andides Kaukaasias, Ida-Aasias. Arv levinud P-Am-st üle Atlandi Euraasiasse

Gymnadenia conopsea - GER 6 pop - otse juurtest klon-sekv - eri pop-c

keskel

arina, Ceuthostoma ja Gymnostoma on monofüleet perek. Tugev biogeo. Aspekt. Gymnostoma ja Casuarina sp. Sh Uus-Kaledoonial. Kasuariiniliste fos:

rkode oli 1.5% erinevusi. Parim liikide eristaja RPB1 geen 1% erin

transgeensete taimed

Laccaria, Suillus cavipes  
Laccaria

PO mõju

Heterobasidion  
Heterobasidion  
Heterobasidion

haruldased torikulised: p

nalüüs

na ruumi

us spp EMH surevad, ent kuivemates ti Hebeloma, Laccaria, Thelephora, Suillus spp

st amplif-probleemid

mia: perek Hygrophorus, Camarophyllus, Hygrocybe

arisons, ruutude summa: kasutus ja erandid; parameetrilisi teste võib rakendada ka mitte-normjaotuse puhul

neist 7 Euroopas; Hydnotrya bailii sh Eestis

36.

Tuber aestivum sage Alpi kuuskedel pH üle 7. Nakatatakse Ku seemikuid Wedeni meetodil minimaalse kontamin

kurents suurem kui liikidevaheline

ilistel kadakatel, 1.2-3.6 m Populusel, tammedel 1-24m; funktsioneerivad ka väh 24m sügavusel; väh 15m süg on leitud eukalüpti

xxx

Cantharellus cibarius

viljakehad vs ECMseem

epikkused hoolimata Tm-st) 16S rDNAle; eri fülogen tasemetel. Proovid looduslikud

osmoses ja sterilis varisel domin bakterid ja kottseened

odavad seened enim 26°C juures, meti xxx  
pikas väh 30st krüpt liigist. Liigid lokaalse levikuga, ent liikide vahel biogeo mustreid pole tunda

õhj spoorisis arinevusi eelm uuringutes

asutada sarnasusindeksit, mis põhineb BD-1 mitte vaid liigirikkusel. Bray-Curtise indeks, mantel-test

Ecuadori epifüütsetel domin Tulasnellaceae, ent esineb ka mitmeid Seb

Laccaria bicolor

mulla mikroseened vs ECM ; mulla mikroseened vs E

Suillus bovinus: võimaline absorbeerima hüüfidega Rb, suhkruid, polüoole, glutamaati, vett, mitte oksaalhapet; e

gen nov

33.

praimerid, kvantit määramine

Caladenia W-AUS: Sebaciales. Spetsiifilisus per se ei mõj orhidee har

te RFLP tüüpidele + sarn-põhinev R-statistik progega ANOSIM

Heterobasidion

Hebeloma ssp

aid kõrgetel taksonoomilistel tasemetel (seltsist ülalpool); seltsi ja sugukonna tasemel oluline konkurents ning kooslused on fülogeneetiliselt koosseisult  
ühendavalt platool. Hiljem tek eri liigid NCAI. N gunni 40 MAT ?st) ja N menziesii (NZL, 55 MAT AUSst) on arv kauglevinud. Vanimad Nothofagus

aginaceae L-Am-st

llifera: (lõunapoolkera troopika mitte rannas OCE)

Laccaria laccata

Fusarium

lemine, keskmistamine

radieerus 80-30 MAT tekketsentriga Austraalaasias. Paljudes rühmades mitmed kauglevikud üle ookeanide. Myrtaceae endi sõsarrühmadeks Heteropy  
sioon proportsioonide analüüsiks

Laccaria bicolor

kaalne mullakeemia, ent mitte geograafia

eid jälgi

tasemel suureneb kõrgusega. Arv. Juniperus-Podocarpus efekt. Eri indeksid. Osad põhin harupikkustel. Segav asjaolu eri evol-liirus

Ts bubmollis, Th. Terr xxx

as männijuures

ormaliseerimine, standardis. Kasutatud hübriid-temp juures piir 87% sekvents identse juures, rohkem mõjutasid üksikult juhuslikult paiknevad valep

sed ja miinused, rRNAI põhinevate arrayde võimalikkus

Russula aeruginea

MMN

Tylospora fibrillosa

, Russula: v palju troopikas -arvbiogeo; fakult: arv EcM seentel fakult sümbiotroofsust per se ei es EcM seentel pinnstruktuuri fakult: arv EcM seentel

Thelephoraceae -v kõrge D13C ja C konts ja D15N

13C, 15N erinev kui EC

t N omastavad

paljud: kasv orgaanilisel ainel või mitte

13C erinevusi substraati

orhideedel, seenlillelistel: ülevaade

Th. Sp.

Rhizopogon, Russula

Thanatephorus cucumeris=Rhizoctonia solani -arv. O  
orhideed+viited

**Tomentella subulacina**: multistage, eelistab orgaanikat osas eri tulemusi, emt ilma fülogen. Hälbeta F, ITS4-Tul, LSU-Tom4, SSU1318-Tom

**mittesuguliselt paljunevate se mittesuguliselt paljunev**

das liikide arv kasvab morf<biol<füil. Krüptilised liigid, näited Neurospora, Schizoph, SacchM, Lentinula. Seega, enamus seeni po Kummutavad Finlay ja Fencheli väiteid mikroobide mittebiogeost.

lust ja nende roll oli ilmselt üsna oluline taimede toitumises

mi. Tsesalp kooslused on väga ürgsed ja arv kliimakskooslused. Metsatüübid sõltuvad pms kõrguses müm ja tsesalp rohkusest. Taimede nimekiri kogu l : quality annotation of ITS sequences of mycorrhizal fungi. PLoS ONE 6: e24940.

w)

al fungi in wooded savannas and rain forests of Continental Africa and Madagascar. Mol. Ecol. 20: 3071-3080.

gi. Mol. Ecol. 21: 4160-4170.

rests: does fruit-body type matter? Mycorrhiza 19: 403-416.

11.3

16.0

22.6

ol. 195: 832-843.

usta (Myrtaceae), but not *Pinus caribea* (Pinaceae). New Phytol. 175: 321-333.

n kiiremad kui juhuslike levimiste vahelesegamine

oonidel: ülevaade ja statistik

sluste võrdlemiseks samal maalapil. Ka teiste ordin-meetodite kirjeldus

id leidub enim Rio Negro-NW-BRA ja Roraima aladel

ades, kus <2700 mm sademeid.

ia-Guyana niisketes metsades. V palju Papilionaceae liike, er Swartzia endeeme. EcM puudest veel Swartzia, Dicymbe, Pradosia, Aldina, Eperua?. Põt endeemsus. V palju Papilionidaceae liike

**Paxillus, Suillus bovinus**

teetiliste eigenvectorite kasutamine variation partitioning analüüsis univar tunnuste jaoks

inokulumi ning närlised, mis muidu seeni levitavad, ei rända metsa ja niidu vahet. Metsas ja niidul eri liigid. Per üleujutus iseenesest ei vähenda ECM-p : 1022-1033.

22-1134.

**Listera/Neottia ovata ja cordata**: mõl assots pms Serendipitaceae nii ni  
Epipactis 4 spp CZ: seonduvad pms kottseentega perek Tuber, Wilcoxi

on > Wilcoxina > Cenoc). Transport toimub kui süsteemis on häiring ja taimede suuruserinevused. Transp toimus ka ilma www-ta isinikust oli teistelt puudelt. Noored doonorid transportisid seejuures rohkem C kui vanad, ent asijal pole bioloogilist pointi

**Rhizopogon luteolus**

alne suhkrisaldus söötmes 0.5%. Väli **Laccaria sp, Elaphomyces sp**, Pisolithus mood EcM nii Casuarina (sh equisetifolia), Allocasuarina kui Eucalyptu rinevad funktsioonid, ülevaade

rd ja maaiseste viljakehadega vormid on arenenud maapealsetest nii kott kui kandseened. Arv põhjuseks põud. Ka saproobidel sekotioideid vorme, ent t mändide jaoks

asvöötme metsadega **Senegalis Uapaca guineensis** ja **Azelia africana** puistutes: lühidalt Austrogauteria, Coltricia cinnamomea, **Lact**  
**Phlebopus sudanicus**: väidet on EcM, aga tegelikult mood vaid seenmantli männiga, mit **Phlebopus sudanicus**: vä  
neo-Congolia ja Zambesian endemismi tsentrites, eriti vihmametsades ja savannides

**Thelephora terrestris, Laccaria laccata** jpt tundmatute seente EcM süntees ja kirjeldused Picea isi  
a alt ja selle kuulumine /hebeloma-alnicola klaadi. Arv mood EcM

lla. KAHTLANE  
isana liigitekkest

**Megacollybia platyphyll**  
**Hebeloma, Setchelliogaster**  
susgeene; suurim patogeensus kui mõlema levik on lai, väiksem kui lokaalne või globaalne

**parasiidi-peremehe koevolutsioon** (lina vs Melampso

ete transporterid ja lagundajad  
**Hebeloma**  
**Hebeloma spp**  
**Hebeloma**

eruv BD mõju võib tuleneda parandatud mullaparmetritest

assi fluktureerumine suurem just liigirikastes paikades  
ib koosluse ajalst stabiilsust, produkt, invas resist; vähendab toitainete kadu e leostumist, populats ajalst stabiilsust, vabu limiteerivaid toitaineid

ud seentel kasvab. Seenekoosluse **mullaseened Kanadas NAAT** transektil: EcM seente BD väheneb põhjapoo **mullaseened Kanada**

as, esteraas, isotsüümanaliüs **Suillus, Paxillus**  
sotsüümanaliüs xxx  
sotsüümanaliüs **Suillus, Paxillus**

rukamatel ühenditel **suurem seente arv m**  
CO1; ei sobi 18S, 28S  
s(occupancy)

: ja seente vahel: anti-nestedness on sage; esineb modulaarsus eriti taimede osas; AM taimedel ohtralt EcMF liike - u 10% kindlalt  
usest. **JPN segametsas eri j**

lele. Ei lahenda SSU introni ja Tulasnellade probleemi! ITS3 ja ITS4 analoogid amplifits 100% ka taime DNAd  
iema, Cenoc. Sh Tomentella, Cenoc, Meliniom bicolor kõikjal olemas. Perek-dest domin Cort(14), Russ-Lact(13), Tomentella (6), Piloderma(4). Olema:  
ey Beatty & Sons, Chipping Norton, A AUS EcM seente f-n ja tähtsus. Coltricia oblectans -peavad saproobiks

**Pisolithus tinctorius: EcM** teke taime genotüübi spetsiifiline  
xxx

**Hebeloma cylindrosporum**  
**Pisolithus arhizus, Rhizopogon roseolus and Suillus collinitus**

äpid väiksemad ja hõredamalt), Gilb taimed ekstreemselt varju taluvad noores eas, varise mass ja sügavus 3 korda suuremad Gilbertiid metsas vs liigiril  
efektiga ega oluliselt takista puude kasvu. Hiline põletamine tekitab puisrohumaat, kus v palju kõndistunud <60 cm puittaimi. Teatud puud nagu Erythro

: 888–895.

**Martellia medlockii** stünt ja kirjeldus

hizopogonile; okaspuude all Pacific northwest

utus

araphysata, Horakiella, mycoclelandia, Reddellomyces, Mattirolomyces AUS kõrbetes. Ei tea, kas paljud on akaatsiate EcM sümb

kohastumuseks per põuale, aga ka külmale. EcM seente tekkearv langeb kokku esimeste imetajate ilmumisega. Osad seened munitseerivad puuseen

Cenococcum geophilum: peremeestaimed ja kasvukohad üle maailma  
Hebeloma, Astraeus, Suillus EcM sünt

Arfzeria, Tirmania, Picoa, Amylascus, Hydnoholites, Delastria, Mukagomyces (Terfeziaceae) perekonna tasemel määramistabelid

cuse sümbioositeooriaga ja oli selles ise kindel. Sai palju vastaseid. Esimesena peeti EcM seeneks vaid Elaphomyces granulatus 1840ndatel. Peale 1894  
Eucangium-Fischerula-ga

ndil. Arv. Et uuemad seenehõimkonnad kohastusid jahedama kliima pärast lumepalli-maad

savannid -Acacia, Eucalyptus; eelmägede nõlvad niiskes -Dipterocarpaceae (hõredalt), kuivemas Casuarina; pilvemets 1000-3000 müm -Nothofagus, L

pe puude juured!!!  
seeneliikidel

NA, fragmenteeritud. Kõrge tihedus SNPde tuvastamiseks. 99% edukus. Väheinformatiivselt seletatud

1 palju

Hydnellum ja Sarcodon: kõrge D15N ja norm D13C

13C ja 15N: arv Phaeoc

:M Cenococcumiga

mikroobide poolt mitmekesisem ja aktiivsem kooslus. Eri koosluste vahel mõj mikroobe enim %Orgaanika, %N, pH

523-630.

Pisol (pärit männilt) ja Sclerod + Shorea mutualistlik kooselu  
Amanita  
Suillus luteus

liigilises koosseisus ja ohtruses põhj suuri muudatusi toitumisvõrgustikes

i: 10% eostest idanes kiiresti  
osa

Cephalophora sp spetsi  
Stephensia=Densoca

.S. Department of Agriculture, Portland, Ore, pp. 115-139.

41-2146.

c kooslused on nested ja see on loodusl normaalne, käib kaasa koevolutsiiooniga. Andmete kogumise artefaktid, indeksid, Soovit tü  
urrence: fix-fix model on parim  
udelid nishi konservatismi ja habitat filtering jaoks

saprotroofid parandavad orhideede idanemist ja arengut

saprotroofid parandavad

xxx

Exophiala, Cladophialophora

nearsed andmed): viide

Network (mittelinearsed andmed): tulemus sama

iasus Morchella ja Caloscypha anamorf **Tuber anamorfid: iseloomustus**, sarnasus Morchella ja Caloscypha anamorfidega  
rtinii

rekondades eri fülogeneet päritoluga - basaalsed v tek patogeenidest, ent erin saproobidest

bav söötis maade kult.

**Thelephora ECM** rohkus tugevalt neg korrel juurepatogeenide arvukusega

**Thelephora ECM rohkus** tugevalt neg korrel juurepati

il vrd ümbrusega kõrgem b-glükosidaasi akt

**Heteroconium chaet**

**Tricholoma matsutake**

**Tricholoma matsutake**

ine, praimerite spetsiifilisus

x

d, ent nende hulk asendus suht kiiresti kõigepealt sõnajala eostega. Seened olid kivististes septadeta ning ei suudetud rühma tuv **krriidi-tertsiaari piiril pea**  
s from a large-scale plot network. University of Chicago Press, Chicago, Pp. 609-628

holoma, Paxillus

on domineeriv pooltes maailma kooslustes, ent tugevam kõrgemal taksonoomilisel tasemel; madalal domin ühtlane jaotus; ülevaak

ise kohta kõige informatiivsem, muidu MATK. Paljud taksonid levinud kas paleo-või neotroopikas

ga. Ei ole siiani arvestanud mikroskaalas kk heterogeensust. Ruumala on palju parem näitaja kui pindala. Suuremate alade puhul z

**Hebeloma leucosarx, Paxillus**

**lele eri kasu: osad suurendavad rohkem** **xxx, sh Cortinarius, Hebeloma, Xerocomus, Lactarius helvus, Scleroderma, Inocybe lacera**

**Hebeloma vrd AM ajas**

**hüpote: mikroobide B**

as

tsid taimede funktsioone eri aastaegadel. AM BD ei omanud positiivseid mõjusid. Teatud AMF liigid andsid taimedele rohkem P kui teised.

mate AM-seentega, ent tagasiside oma mullaga negat-neutr. Invas kõrrelt saadud seened ei pärssin **invasiivne kõrs Cenchrus Bots**swanas on seotud vaid I

Taimede kaitsemehanismid ja nende universaalsus juurtes ja lehtedes. Arabidopsis kasutab põgenemistaktikat. Seemnete kaugl **v oluline on uurida inter**

omi evol: Cantharellales ja Hymenochaetales seltsides esineb nii per kui mitteperf; algul mitteperf, ent perf on tek arv 4 korda isese

eerib rohkem muid seeni. SSUs parim kombinatsioon NS31-AML2 ja ilmselt ka NS31-AMDGR. Soovit kasutada kahte kattuvat p

oos taimega, vähem taim üksi, suurend: **Paxillus**

eritab sümbioosis olles er oksalaati, vähem ka malonaati ja atsetaati, siderofooridest ferrikrotsiini, vähem ferrikroomi. Arv et oksalaadi eritamine võib c  
ed ja mänd eksud oksalaati, malonaati ja fumaraati. ECM seente juurdetoamine süsteemi ei suurendanud kogu org-hapete prod, kuid muutis kvaliteeti. P

d on nooremad, neil on suur efektiivne pop suurus. Sealt võib tuleneda incomplete lineage sorting. Puu-põhised NJ ja pars. meetod

tljud on väga tundmatud.

eerimine ja seente ning bakterite sekvenceerimine

0 replikaadiga; detsentreeritud PCA binaarsetele esinevustunnustele

vesi=maismaa>merevesi; v palju korreleerub 15N rohkus C/N suhtega toidus

(Scrophulariaceae)???

**Suillus variegatus**

**CWD: ECM palju rohkem, CWDs hartig net/cortex, mandli d suurem**

**Suillus variegatus**

alkoholi oksidaas: detekteerimine Southern blot meetodil Phaneroch LiP ja AAO probeodega

**LiP, artiülalkoholi oksid**

**Heterobasidioni tõrje seentega**: eriseened kõik vähem

Phlebiopsis gigantea kas

etsialist tasub olla siis kui kumbki pop ei fluktrueeru

lemustega sarn; proovivõtu intensiivsus mõjutab vähe d-statistikut

se ja ajalise kattuvuse kaasamine bipartite network-analüüsi. Filogenees kaasati mõlemal juhul, ent mitte integreeritult. Tuvastasid  
evamini kui vastupidi. Lisaks ohtrusele mõj ka fülog seosed ja morf või fenol kattuvused. Tugevaimad vastasmõjud liikide seas esi  
d lubjatud pinnast

:56-268.

latusest - tulemused erinevad

ende integreerimeine ühtsesse teooriasse

phyllum: läbisegi, eoste värvus perek jagamisel halb tunnus

l. Neil liikidel erinev kohanemine looduses. Kui Suillus-rhizopogon välja jätta, siis peamiselt on introduts laia peremees-ringiga liig  
seente diversiteet taimele on positiivne aeglasekasvulistel, etn negatiivne kiirekasvulistele kuu

s vähe liike

les eri aegadel ja eri põhjustel

is suurendavad võimsust. Programm

ula klaadis -ericaceael

√A Ceratobasidiales [hiljem Sebaciales Weiss 2004] isol india kõrbest AM-klamüdosporist. Kultuuritunnused: õh kestad, dolipoorid, mitteperfor pare

LAT. Mereelukatele maismaatõkke teke ise ei pruugi olla isolatsiooni alguseks -süvamere liikidele piisab madalaveelisest tõkkest

väga erinev. Liikide arv huumuspinnasel suurem kui kummaski lagupuidus

arv pole seotud genoomisuurusega ega sellel ole ka fülogen signaali (genoomisuurus on konserv); Parim liigi-tasemel threshold 99%

:(Thanatephorus -multinuc), Ceratobas (1-2 nucl), Waitea anamorfidega. AG rühma **Rhizoctonia: Ceratobasic Rhizoctonia: Ceratob**

ine liigikontseptsioon tihti parafüleetiline DNA fülogeneesi jr; areng eri mandritel arv hiljutine, peale kontinentide drifti

**Pleurotus ostreatus kom**

**Piceirhiza bicolorata -üks** isolaat mood nii EcM kui ErM

**vs ECM levik metsatüü**

**Laccaria bicolor**

31-299.

it . Miombo alates 11000 a.

domin Hydnellum

s kütuste, N akumul väetamise ja metsaraie tagajärjel. Enim on biosfääri mõj maakasutuse muutus. U 50% maismaast on tugevasti modif inimese poolt. l

lagunemine oli aditiivne ehk komponendid keskmine

sarrühm; kasvukoha jr arv saprotroofne

oii 355: 341-352.

idele suur tähelepanu. Nende plesiom ja sünapomorf tunnused

ni, iga liigi geenidele 6 probet

igi geenile 10 probet

ga: erinev puhastusef, PCR, praimerid, kloneerimine, kimäärid

tenduses; -10m AUS+PNG ühenduses; jõgede iseloomustus max ajal; ajastute kestvus

in Russula CBH sekventsid

aid EcM

**Piceirhiza bicolorata; Hymenoscyphus; ECM=ericoid?**

**bicolorata sümbiont kuuluvad Helotiales Meliniomyces bicolori-tüüpi mükoriisa isolaatidest mood EcM vaid M. Bicolor s. str. Ja M. Vra**  
**Meliniomyces bicolor jpt** lähedased isolaadid sünt EcM vs ErM ja fülogeneetilised seosed



isest kuni deponeerimise ja andmebaasideni

taimlatest kuuse risosfäärist suur hulk seeni, r

e produktiivsuse ja BD muutuste. Tugevasti mõjutati nematoodide ohtrust ja mükoriisset kolonisatsiooni, vähem seente ja bakterite  
itud mitmekesisus suurendab prod. Statistiliselt eemaldati erinevate liikide efekt eraldi.

tamine geneetiliste pop andmete ruumilises analüüsis; ei sõltu niivõrd proovivõtu disainist kui Moran I ja Mantel test

ionotaceae. Mikroperekonnad leiavad end mol meetoditega õigustatult. Coltricia spp + Coltriciella spp mood monofüleet rühma Pyrrhoderma, ning (Hyp

(Am): fenoolsete ühendite lisamine induts vastavate ensüümide aktiivsust. Puude all oli ens akt suurem kui >10m eemal

13C PLFA: olulisim pui  
mullaseente (attiivsete j:

Tremellodendron spp on EcM

e ensüümide rohkus kui dominantidel lepal või väiksem PsTs puhul. Arv lepp on valinud endale P-efektiivsed partnerid evolutsioo

ama, aga 15N erinev huumus-ja min-horisondis. Enamus 13C tuleb kuuselt, mis on vähemuses vrd tammega. EMH biomass 4.8 -5.8 t/ha, samas juuri 7

pink, Piloderma

Russula, Lactarius, tuberculata, Piloderma, pink

st

mütseeli eristamine ECM

Laccaria, Hebeloma

Laccaria bicolor

Paxillus, Suillus variegatus

ikus suhtes erinevus hõimkonna ja alamhõimkonna tasemel

Seened: Leotiomycetes,

ie võimalused laboris ja in situ: membraanide kasutamine, quantum dots; siiani mõeldavad kõik tehnikad ensüümide pot aktiivsus

valeandmeid, andmed puudu. EcM ja NM taimed ning mükoheterotr tek palju kordi

enid olemas kõigil maismaataimedel. Hiljem need geenid soodust ka muude juuresümbiooside teket

ora finlandica hiljem) ja Phialocephala fortinii kirjeldused - erinevus Phial dimorphosporast; Chloridium paucisporum (hiljem = C

le teke: sagedasem, mida sarnasem DNA, mida pikem loik, mida lyhem polymerisatsiooniaeg, mida suurem tsükliite arv; CHIMERA-CHECK programm

ist, statistikat

ülogenees: basaalne Cedrus (((Pinus(Picea+Cathaya))+(Pseudotsuga+Larix)) + (Tsuga+Pseudolarix+Abies+Keteleeria)). Kalibreering: Pinus-140MYA  
nalüüs vs DNA meetodid

söödavad ECM-seened: ülevaade

Geoglossum-Sarcoleotia on teistest palju basaalsem haru. Rhytismatales ja Lophodermium-Pilidium on võimalikud sösarrühmad Helot ss-le. Erysiphales

itud lehtedel olevatel endofüütsetel vormidel

e aligneeringud

dmatu kottseenega. Üks liik ka looduses ECM, teisi ei tea

OrM: mykoriisadest seente isoleerimine ja seks faasi indutseerimine ning kirjelduse

ga ECM Pezizales: teleomorfi ja anamc Muciturbo: hüpogeiliste viljakehadega ECM Pezizales: teleomorfi ja anamorfi iseloomustus, kasvavad eukalüpti

OrM: mykoriisadest seente isoleerimine ja identifitseerimine: Caladenia spp. Ja lah

ie, Stylidiaceae

Orhideede sümbiondid austraalias: Ceratobasidium, Tulasnella ja Sebacina vermife

Densospora (syn. Glomus) tubiforme mood EcM, mis meenutab Endogone EcMi: peened hüüfid

Thanatephorus gardneri | Thanatephorus gardneri (isolaadid WARH26 ja 0901)(Rhizanthella gar

et kasvada sygavast mullast maapinnani. Hiljem EcM arv fakultatiivne; taimedel mikroseedmed; AM induts koigi liikide kasvu tugevasti, vaid moned Pt

Sebacina vermifera EcM Sebacina vermifera EcM süntees Leptospermumiga. Isolaat mood ka O

ula archeri (mitteMR); Geopyxis carbo eukalüptimetsas 1-3 a peale põlengut; pürofiilsetel kottseentel oma suksessioon. 1a: Anthracobia melaloma, A. l

Endogone, Sclerogone mood ECM. Mõned Endogone liigid mitte-MR; üks spetsiifiline vaid männile, teised v ar

EcM süntees Tomentella sp-ga koos In Tomentella sp, Peziza whitei, Labyrinthomyces, Elaphomyces, Laccaria, Sebacina vermifera EcM süntees koos

Rhizanthella slateri endofüüt mood ECM eukalüptide, kasuariinide, liblikõieliste ja astrilaadsetega, Rhiz gardner

OrM: seemnete idandamine juurtest isoleeritud seente abil: Thelymitra spp ja Diuri

r, bakterite molekulaarne liigidefinitioon (97% SSU = 70% DNA-DNA reass kineetika); 16S rDNA põhjal ei saa vastust funktsioonidele. PCR põhjust

taimelehtede algupära ja

MANOVA asemel ilma bonferronita

tõenäosus välguks. Seal madalam BD, väiksem C/mass, õhukesem huumus, suurem [N] huumuses ja lehtedes; kiirem lagundamine  
: probleemid, ämbrid, korrektne katse püstitus

aniasm, kineetika, kelaatorid, aktiivsus

Phanerochaete  
seente-bakterite suhe

kuni 6.5 m raadiuses

RSA: iga orhideeliik on spetsialiseerunud mingile mesilastolmeldajale,  
Orhideedel mitmed rühmad on iseseisvalt läinud EcM seentega koosellu, kus on is

s, Pulveroboletus, Phylloporus tihedad sidemed Kagu-Aasiaga -arvab et tulnud Kagu-Aasiast koos puudega. Paxillus -sidemed L-Am ja NZL Nothofagu  
s v liigirikas. Käib läbi kõigi troop perek orientaalbiogeo. Heimiella on seot eri Fagaceae perek-dega; Suillus troop männikutes ü harv; Tylopilus -Austre:  
the Ecosystem. CRC Press, Boca Rayton, FL, USA, pp. 881-896.

tricus on arv kompleksliik nagu Pisol.; Gyroporus -palju liike N-Am, kosmopoliidid C. Cyanescens ja G. Castaneus. Lähedane Boletinelluse ja Phlebop  
s -liikideks tegemisest sõltumatu, põhineb OTUde keskmisel kaugusel; võtab arvesse kõrgemaid taksonid; normaliseeritud vorm

ikute ja puude seas, seda suurem on seemikute ellujäämus. Selet patogeenidega, kel teatud spetsiifika, mis tõen suurem lähitaksonites.

põhjal sõlmede kauguse jr arv indeksid. Toimib vihmametsa puude kohta Borneol. Plottides fül sarnasemad liigid kui juhuslikult regionaalsest liigifondis

is kooslustes kui arvest RDNA koopiate arvu. See erin 10k-30k/rakk

heterokariootne, monosporsetel järeltulijatel mõnikord alleel olemas, mõnikord mitte. Enamasti teised Laccaria liigid ei amplifitseeru SCAR praimerit

Tuber aestivum

ITS põhjal. Erinevused viljakehade ja eoste küpsusastmest.

Tuber aestivum jt.

Tuber aestivum - inokul tammedel ja sarapuudel saak alates 5 a; import-inokulum võib olla kehvem; tuleb rohida  
elihhenis kottseen on jaotunud samade seeneliikide vahel Stictis ja Conotrema: lih

Helvella: H. Aestivalis tõestati ITS põhjal, H. Corium ja H. Dovrensis mitte. Lisaks veel 2 Helvella liiki, mida ar

Thelephora terrestris jt2 liiki kui Thelephora terrestris jt2 liiki kui metsataimlate patogeenid ja puudekägistajad

vaimad; troopika suuremat liigirikust mõjutab vähene väljasuremine

Auriculariales, Sebacinaceae

Sebacinaceae fülogenees Sebacinaceae fülogenees

Heterobasidiomycota: T

tika ja ökoloogia. Seotud perek Geastr Sebacinales: taksonoomia, st Sebacinales: taksonoomia, süstemaatika ja ökoloogia. Seotud perek Geastrum basa  
iüte nii Sebacina kui Serendipita hulgas. Leiti Aafrikast ja Eur-st samu tüvesid, mis viitab reostusele. Sebacina-spets praimerid NS

Phanerochaete

i Sebacinaceae: AUS liivapinnalt ja Jamaika CWDIt

agu Tremella; 2 liiki. Üks kasvab rohhtaime vartel Euraasias ja teine koorega puidul USAs ja okeaanias.

Tuber melanosporum

d fluctuations and underlying mechanisms in terrestrial orchid popul OrM: Goodyera ja Liparis idanevad mullas ja huumusel paremini kui puidul, Tipul  
AM ja ECM vs juurepatogeenid: ülevalde. LOENGU

nise-aligneerimise proge VI-Cut

gone uusimas -sõsarrühmaks Mucorales s.str + Umbelloopsis

Sis, Ramaria, Russula (domnin2), Sarcodon, Sebacina, Tomentella, Tricholoma lineages

us peab olema tagatud

rtikli kodulehtedel, kodulehel või oma arvutis. Viitab ka mitmetele metaandmete standarditele. Andmete arhiv vajalik, et 1. ülehim

l akumuleerijad  
ooni puudumine suureneb

ülevaade

timisest, LK-st, toiduahelast, invasiivsetest, kliimamuutusest; prioritediks ajaline konserv., parasiidi-peremehe seosed, pos liikide  
ne levik, nisi konserveeritus, võime nissi laiendada, taksoni vanus. Paljud klaadid tek troopikas ja üksikud levinud bor vöötmesse. Vanasti troopikat roh

: kalibreerimine: tuleb välja, et radiatsioonid toimusid arvatust varem  
llouini indeks (LINK vabavarale)

Wilcoxina, Phialophora-like ekstendoMR männil

Phialocephala dimorphospora, P fortinii, Phialophora finlandia, Chloridium paucisporum Phialocephala dimorpho

) m/a

sest sama taimeliigil otsesed järglased pms läheduses; taim ei suuda kontrollida mida seen mullas teeb; seent huvitab maximis fotobiontide arvu; taim ki

hulgast parimaid ja halvemaid minema peksta, kui sümbioos on mõlemale kasulikum pikemas perspektiivis; kui on suur ruum ning tugev looduslik valik,  
te parasiitideks. ECM püsivust soodustsobivaima partneri valik, pseudovertikaalne ülekanne (lokaalne levik), vastastikune üksteise ärakasutamine

Trechispora alnicola -pa  
laguneval kuuse ja männ

rfoI põhin taksonoomiat eriti kui ei ole kindel liigisisene varieeruvus

Mycol. 23: 94-104.

Coriolus versicolor

atel aegadel arv jõed toimised puhvrite ja levikukoridoridena

Echinodontinum

a Astraeus; SE-Aasias Calostoma, Gyroporus, Diplocystidiaceae; Aasias või SE Aasias Pisolithus ja Scleroderma perekonnad; ügr  
us, liigiteke ja väljasuremine ei erine

solithuse ja sclerodermaga ühes pundis, mood EcM

dus Kanada arktikast, kus on kodominant paljudel EcM ja AM taimeliikidel: liigikirjeldus. Fülogeneet SSU järgi lähim Loramyces; ITS järgi Mollisia  
bp; Täpne protokoll; parimad matchid organismiga, mille DNAGA langeb 100% kokku. 100% tulemused ka 2 organismi DNAd segust; võrreldavad tük

us

ilised mikroarrayd: Probed 20 b, varustatud ka 1valepaard-kontrolliga. Disainitud fragmentidele kogu genoomis. Sihtmärk PCR-DNA, 50 b pikkused fra

eksootiliste patogeene levik troopilistes metsaistand

okstilaasi aktiivsus mükoriisias palju väi Amanita muscaria

, puu toeusteta

levitud tuulega, vaid üle vahepealsete saarte või mööda Antarktikat. Paljud AUS, PNG ja antarkt saarte külmataluvad alpiinsed liigid pärin NZL-st. Gra  
odomeen -öite tekkeks vajaminevad jrk: MADS olemas nii Gnetales, okaspuud kui õistaimed, Gnetales pole katteseemmetaimede sõsarrühm.

alt on teada seonduvat mükohet taimedega

z.

pilliroo juurtes kultuur + sek pilliroo juurtes kultuur -

stunud rühmadele. Leiti 35 liiki, sügiseti rohkem kui muul ajal; andmete võrdlemisel kas Chao1 ja ACE liigirikikuse hindajaid

imise, sh konkurentsi ja fasilitatsiooni mõõtmise viisid ja interpreteerimine; ülevaade

a., juured leht ja okaspuudel samaelaised, ent lehed okaspuudel pikaalaised, v.s. lehisel; SRL suurem lehtpuudel. Juured vahtral  
atsiad ja tsesalpiinilised

enis, kus tek sh tsesalpiinilised ja akaatsiad

i tänu keemiale. Muutused aineringes.

Amanita thiersii on s

val metsas. Invadeeritud paikades domineeris VK biomassilt, ent EcM osakaal jäi 0.2 ja 0.5% vahele, ent sagedus oli suurim (20%

anitel on kadunud geenid CBH ja paljudel vähem endoglükanaase; proteaasid samal tasemel. Katsed söötmetel andsid sama tule  
1 liigid ja biogeo: sage AUS ja E-NA (puudub W-NA-s). Arv tek Põhjapoolkeral ja alles pleistotseenis liikus SE-Aasia ja PNG kaudu Queenslandi, vahe

; suurim tihedus on maismaal  
Am ja viimase 47-13 MA jooksul levis arv merevee kaudu Aafrikasse ja sealt jällegi meritsi üle India ookeani SE Aasiasse. Autorid seostavad seda suurt

Laccaria bicolor

ldastest liikidest, mis moodustavad pika saba

xxx, strateegiad, mädam

on troopikas keskm 2x kiirem kui parasvöötmes. See ei sõltu liigitekke kiirusest, ent võib olla seotud mutats-kiirusega (geenitr  
t tuulte suuna muutuste tõttu

Caladenia: palju liike, mille OrM seemed kuuluvad Serendipita-Sebacin

Pisolithus vs ? Vs Suillus luteus

üübid. Mingit jälge paraseksuaalsusest | Cenococcum

Cenococcum

setes: VK ühe sügospooriga. Kasvab risosfääris Pieris taiwanensis ja Senecio nemorensis

Cymbidium spp Hiinas assots Ceratobasidiumiga, mille kolonis potikat

5S rDNA. Konstruktsioon, n=2\*(3), spetsiifilisuse ja signaali optimeerimine. Temperatuuri tõstmine, mõne reagendi lisamine, suurendab spets  
NE Am-aasia; Ramaria -NE Am-Aasia, NW Am-NE Am; Boletaceae -NE am-NW Am, NE Am-Aasia

Suillus

mitmed

mulla mikroseedid suud

Pisolithus, Cenococcum jt

4 bp oligod; blotid eraldi; ükshaaval optimumtemp katsetamine. Mõningane ebatäpsus er perek sees.

amiseks liikide jr ???

te N ühendeid kui EcM ja AM taimed - tegu nii suurema SRL kui ErM seentega arv.

iogeograafiaks

maadel biomassi kasvuks

juure- vs risosf vs mulla juure- vs risosf vs m

a N/P=17; Suurim C/N/P tundrates, boreaalsetes metsades ja märgaladel; C, N, P mikroobides väheneb eksponentsiaalselt mullas s  
ja levis enne eotseeni Ameerikasse

Ceratobasidiaceae1 ja 2 | Ceratobasidiaceae1 ja 2 linidid mood liigiga Platanthera minor ja puu  
Chamaegastrodia sikokianalt Chamaegastrodia sikokianalt eraldatud Ceratobasidium mood potis EcM Abies firn

Thelephoraceae liikide isoleerimine orhideest ja taasinokuleerimine Cephalantherale ning peremeespuule Quercus serrata

matsutake

Hebeloma, Lacc, Lact, Russ maria, Russ nigricans, Sclerof, Suill, sünt koos Pinus densifloriga. Fail: Morchella  
xxx

Monotropastrum humile assotsieerub väga paljude Russula ja Lactarius

matsutake

paljud: kultiveerimine  
jaapani söögiseened

sarnane inokuleerimine

ruderaalid, kasvukiirus erinevatel lämmastikuühenditel

ruderaalid, kasvukiirus e

Cephalanthera falcata assots tomentella-thelephora paljude liikidega ja  
Cephalanthera falcata: reintrotutseeritud orhideedel kasvavad pms Ton

iti N ja P)

) -nimi Mikola ja Laiho poolt kirjeldatu Wilcoxina mikolae

levik kõrgusgradiendil: 3800 m vs 3200 m rohkem levinud stress, N ja S cycling geenid

ititüübid, replikatsioonivormid

linast ja Kagu-Aasiast. Seotud Pinaceae, Fagaceae ja Dipterocarpaceae-ga

letaceae atp6 põhjal. Chalciaporus on basaalne Boletaceae, Paxillaceae eraldi (sellele basaalne Hydnomerulius pinastri); Scleroder

ie- ja loomaliikidest on tegelikult seened. Loomadel ITS2 pikkus (100)195-510(1209) b; GC 5-90%;

loB

x ja Schoenoxiphium sõsarühmana.

ftsionaalne BD vähenevad Antarktikas pooluse suunas; omavahel korrel; Manteli testi uudne kasutamine võrdlemaks Phylochipi ja

na, Japan.

s segi)). Aasia on refuugium

Tomentella tüübikirjeldused: T. Punicea, T. Radiosa, T. Cinereoumbrina

Monotropoidne mükoriisa: Monotropa uniflora-Russulaceae: Martellia ja Gymnomyces .

el ja arhedel. Aktinoriisa ja mügarbakterite omad on sõsarad. Korduv horis ülekanne bakterite ja arhede vahel.

Cypripedium, Paphiopedilum CHI assots kitsa ringiga Tulasnelladest. F

eaarselt suurem; sõltub eelkõige mulla P sisaldusest ja sademete hulgast - troopika vanadel muldadel on P välja leostunud

imum Likelihood Estimator (NPMLE) indeks koosluste võrdlemiseks, mis baseerub paariviisilistel proportsioonide võrdlemisel

Apostasia, basaalne käpeline, eriliigid seotud väga kitsa ringi Ceratoba:

ooniarray

xxx

arbutoidse mükoriisa sünt puhaskultuurist: Thel terrestris, Piloderma bicolor, Cenoc, Pisol

slustes ei korreleeru ühegi taimeliigi ega funktsionaalse rühma puudumise/esinemisega. Liikide kadumine võib end mikroobidele mikroobide PLFA mitm

saa vrd parameetrilise statistikaga

Carbomyces New M

mikroseened: peale preeriran mikroseened: peale pree

Tuber albidum (pos) süntees kastanil, tammel ja lepal

Tuber vs konkurendid kasvuhooes

Tuber, Hebeloma

fungitsiidid parasitide v

orella, järgmine on suguk. Nymphaeales. 12 geeni põhjal  
thedasse.

Corallorhiza trifida juurest isoleeritud Corallorhiza trifida juurest is Corallorhiza trifida juurest isoleeritud kandseen mood EcM männil. Uuemate uurin  
. isolaadid tootsid tsellulaasi ja PPO, Tulasnellad vaid tsellulaasi; Orhideed: fotosünt orhideede juurtel pms Ceratobasidium; Thanatephorus=Monilio

magine eostega levik

spetsialiseerumine eri peremeestaimedele suguk Umbelliferae piires. Kaasneb osaline sobimatus, geogr erinevused  
ton, FL, USA, pp. 241-263.  
'86-297.

**Mycosphaerella graminicola**: vt pealkiri, levikutsenter

dus

J

m teiste filamentsete kottseente hulgas  
lariomycetidae+Hypocreomycetidae+Sordariomycetidae. Algne eluviis arv parasitine, kust hiljem mitmeid kordi tek mükopar, saproobsed, soolavee, pu  
millest väiksem osa, mis asustab juuri, nimetati Rhizoscyphus

seloomustamiseks. Ekstraheeritud 16S rRNA; Sulamistemp ja dissots-temp definitsioonid; vältida tuleks degenereruvate ja inositooli sisaldavate praim  
% DNAd kaob); isopropanoolis pole vahet, kas 1 h või 24 h, -20°C või +20°C; SDS on efektiivne; puhastamiseks parim geel + kolumn  
agenoomika mustritele. Põhifunktsioonid olid eri moodulites. CO<sub>2</sub> tõus mõjutab mustreid

lutused ruumilises skaalas

kkonnaproovidest. Ülevaade, soovitus: parim 19bp oligod >1 bp valepaardumise, soovit otsas  
dkus palju suurem, domin pole; all tugev domin, domin ka üksikud fülogen rühmad  
rite diversiteeti mullas mõjutab C-rikkus, C-heterogeensus, konkurents, isolatsioon, vähem kk fluktureerumine ja C ülekuüllus. Kui isolatsiooni pole ja C  
kkonnaproovidest. Ülevaade, soovitus: parim 19bp oligod >1 bp valepaardumise, soovit otsas, VIITED; fülogeneetilised arrayd, funktsionaalsed ja kc

sarnasuskoeftsendid

**Suillus grevillei**

Suillus grevillei

iki indiv eristada, eri kodominantsed markerid on lokaalselt tugevasti agreg -arv esed levivad mõnikümme meetrit. Samas 700 m kaugusel olevad po

**Suillus grevillei**

**isoleerimistehnikad**

**Orhideedel (C3) v neg 13C, korgem mykohet orhideedel**

**Pyrolaceae (40-83%) ja Orchidaceae (Platanthera leucostachys: 25-32%) mitmed li  
Corallorhiza trifida on poolmükoheterotroof (52% N ja 77% C seente kaudu), ent c**

nad biogeogr erinevused, eriti aga merepõhja ja ventide asukatel; produktiivseus seletas u 5%

nt singletonide ja <50sekv-OTUde väljaviskamine ei muuda tulemusi kvalitatiivselt, ent vähendab dispersiooni!

|                               |  |
|-------------------------------|--|
| tset ja ökosüs restoratsiooni |  |
|-------------------------------|--|

|        |  |  |
|--------|--|--|
| e arvu |  |  |
| tmine  |  |  |



juurtes **Populus deltoides**el bakterid ja seened: 454 LSU. Juurtes oli palju Actinobacteria; juurtes **Populus deltoides**el bakterid ja seened: 454 LSU. J

ammooniumi oksüdeerijad on mullas enamasti arhed, mit  
S2 seentele, trnF plastiididega eukariotidele, SSU kõigile. Univ-praimer on paljude hälvetega ning ei oma piisavalt resolutsiooni; Soovitavad kas

bakterid mullas: 454

bakterid mullas: 454

**Bakterid risosfääris** vs bulk mullas: v erinev

hul on ohtrushinnangud vähemtäpsed, sest analüüsitakse ka puhkeolekus rakke; ilmselt erinevused ka rakkude lüüsumisvõimes  
;ukonnad v ebavõrdset

a-poolkerale ja seal hiljuti radieerunud. Paljud teised tööstuse pärmid on hübriidid eri liikide vahel, mis on kasutusse jäetud soodsate omaduste tõtt

ikartiootile HiSeq NY Central park: eriti prokariotoo kooslusi seletab 22% pH, euk 4.4%; Mantel testi põhjal ka kooslused on tugevalt korreleeri

**invasiivsed palmid** assots väga **generalistide seentega** invas-mullas **inimese suuõõnes** (saliva, plaque) sadu baktereid

Populus: yle 50 AMF OTU 3 proovialal

itsis 700 km<sup>2</sup> alal 200 alal: ruumilist mustrit ei ole; Mulla P mõj neg ja pH, taimede BD ja kõrgus!! mõj pos liigirikkust; seente fülogen beta-BD kc

abanenud alad: enim Hypocreales ja Mortierellales ja Helotiales. Seente elurikkus ei muu **Lyman liustiku** alt vabanenud alad: enim Hypocreales ja M

mi-analüüsides SSU kimääre palju vähem; Proge ChimeraSlayer

itseid järjestusi teistelt bakteritelt



Quercus lehed: meelelt liike. Erinevused linna ja linnaserva vahel

nuidu magatakse maha patogeeneid jm, olulised taksonid; Markerid peavad olema soovitud, aligneeritavad et kasutada fülogeneetikas. Soovitud tekitada  
seente hõimk muutused väikesed metagenoom mikroobidel vs mulla soojendamise 2 kraadi  
2-5 GB andmeid ehk u 5-10 Miljonit Hi-Seq sekventsi

hõimkondade ja metabolismiradade avastamine. Amplikonipõhised on probleemid madal reprodutseeritavus ja kvantitatiivsus. Funktsi-geenide analüüsi t  
e Bakt hõimk-dele. Amplikoni-põhised analüüsid kasutati 3 eri barcode SSUs. Mõnel väga tugev primer bias, mis seostub mismatchiga, ent teistel misn  
t. PCR-põhised ja metagenoomiandmed pole omavahel võrreldavad ning ka 454 ja Illumina andmed pole võrreldavad. Väidet PCR alahindab har  
is eri aladel eri kottseened; Ca conc suurenedes ens akt väheneb. Bakterite tsellulaase ei avastatud, seega arv. nad varastavad seente tagant

Uude koosseisu; palju unikaalseid OTUsid 52\* juures, kõrgematel vähem unikaalseid  
võivad mitte kasutada Sobs, ega estimatoreid, vaid mitteparameetrilist Shannoni ja Morisita-Horni indeksit, mis ei sõltu sekveneerimissügavusest  
eid.

NS31-AML2 454 vs TRFLP: tulemused kvaliteet ja kvantiteet sarnased, ent pyro oli tundlikum ja andis märksa rohkem OTUsid. T

eri hõimkonda kuuluvate organismide koosseisist ja vältimine eri põhjustel, ent ka geograafias: Ruumenis: bakterid, arhed, ciliaadid, seened. paljude eri g  
ve on väiksem. Ka Illuminal endal on mitmed seotud vead

valiteedikontrolliga;

pH määrab bakterite BD (unimod pH6-7) ja koosluse stru

it (54%) Agaricales, Cantharellales ja Atheliales. Liigirikkus ja BD väheneb sügavuti; 25 OTUt rohkem pinnapoolse, 8 OTUt eelistasid sügavamat  
osits.

domin Hypocreales ja Helotiales, vähem Pleosporales, Xylariales, Mortierellales

liigirikkus ega DNA arvukust, ent oluliselt määrab koosluse str. Helotiales eelistab happet pH tõus suurendas liigirikkus ja DNA biomassi lokaalsel

näärud; suutis eristada ka sarnaseid liike kui liikidevah erin > liigisis erin; liigisis var polnud püroseqv artefakt. Arvatav liigirikuse alahinnang sul

nide väljajätt suurema mõjuga. Titaniumil võib olla ka suur transversioonide%

singletonid on mitte-target lõigud genomist; kimääre väga vähe, vead olid sekventsides ebaühtlaselt jaotunud; multi-seq aligneering tõstab samut

ikemad järjestused  
h seepärast et nende kvaliteet on juba algul kesine ja halveneb v kiiresti;

## Pürosekv 200 bp SSU

W, Harend H, Guo L, Greslebin A, Grelet G, Geml J, Gates G, Dunstan W, Dunk C, Drenkhan R, Dearnaley J, De Kesel A, Dang T, Chen X, Buegger F, Brearley FQ, Bc

õ tõus, induts põud: ohtrusele ja liigirikkusele pole olulist efekti; kooslustes domineerib bakterid vs CO<sub>2</sub>, temp, põud: rikkus sama, ent põud muud

id

amisega on NBC täpsem

hoog GS, Del-Prado R, Dentinger B, Dieguez-Uribeondo J, Divakar PK, Douglas B, Duenas M, Duong TA, Eberhardt U, Edwards JE, Elshahed MS, Fliegerova K, Furtac

d viletsaid praimkereid.

revusi pole

asukoht, eri peremehed ja eri viljumisajad. Mitmed taksonid on tek just peremeestaime järgi

gid, mille poolest albiinod ja FS isendid ei erinenud; lisaks Ceratobasidium, Helotiales, SordM ja mitmed erinevad EcM seened. Albiinodel kõrgem N konts ja d13C; palju

Bakterite mass-sekv planktonist: 516 OTUt (algelt 1067, millest ei

DSE: ei tohi nimetada mükoriisaks, pigem võrrelda lehe-endofüütidega. Inh patogeene; kultuuride kirjeldused ja määramistabelid perekondadele;

anud

rev

protistide ökoloogia rev

vs ErM erineva N, P juures

vs AM erineva N, P juures

Et söövad mullaloomad eoseid, mis on terved peale seedimist - arv levitavad

atoramaria ja Echinoram. Ja asteroram. Isotoopide 15N sign baasil

3E. Bakterid väga mitmeklesised, sügavuti liigirikkus väheneb; seemed liigivaesed, sügavuti liigirikkus bakterid ja seemed. DGGE. Bakterid väga mitmeklesised, sügavuti liigirikkus. Dark Septate mitmekesisus nülul, pöögil, erikoididel: palju morfotüüpe kultuuris, sh panneldega kandseen saged; Phialocephala kõigil, eelistatult arктоalpiinses piirkonnas

Terminalia amazoniaca ja Urochloea-rohi erinesid AM koosluste poolest

sem kui mitte-MR taimel ja EmH-ta MR taimel, ka transpordil pealsetesse;

timul erines isolaaditi väga tugevasti. Aasta aega seisnud isolaadid kaotasid sümbioosi võime

Malaisias kolonis väiksem raiutud aladel. AM tek ka Intsia palembanical. Euroopast sissetoodud AM inokulum põhj palju suuremat juurdekasvu k Malaisias: kolonisatsioon suurem puutumata>valikraiega>lageraiega aladel nii kohapeal kui potikultuurides; samas spooride produktsioon suurim

anthus, Aphanocalyx, Didelotia, Cryptosepalum), Detariae (Intsia, Afzelia, Eperua), Papilionoideae (Mirbelieae, Aldina, Pericopsis, Swartzia) mood

on nad võimelised seal ka eksima. Baiesia posterioorne tõen = p

spooride idandamine

spooride idanemine bakterite n

vs ECM: diversiteet globaalskaalas, tähtsus

tähtsus globaalskaalas

taastumine peale vulkaanipurset, väga tugev positiivne seos näriliste ja muttidega

AM, DS vs ECM Adenostoma /Rosaceae)

Gaultheria shallon; seq domin Sebacia ss Warcup, Capronia, Hymenoschyphus, Phial

AM kolonis kevadel madalam kui sügisel, väheneb org aine kasvades bakterite kooslused on häiringutele muutlikud ja toimub k  
Kapimaa taimede MR staatus: Ericaceae-ErM; EcM pole; NM -Cryophyllidae, Brassic

RNAd teat kohtadest  
neetrikud

transp taime

Rhizopogonia inokuleeritud mullas ebatsugaal kõrge N2 fix tase -

lis, Englerophytum, Delpydora jpt

rühmad: Helicobasidium, Tulasnella, Sebacina, Thanatephorus, Ceratobasidium eristamine dolipoori ja parentosoomi ultrastruktuuri järgi, kultuurimorfoloogia, sh sklerootsi

Penicillium sp, Verticillium sp, cf Phialophora; cf Hymenoscyphus, pms tundmatud

15-20 peal +-stabiilne

inimese soolebakterid: väga mitmekesine seltskond. Helic

d taimede pinnal. Funktsioon, fülogenees, kohastumused, hotspot

bakterid, arhed ja seened taimede pinnal. Funktsioon, fülogenees, k

Structural equation modelling AM seente kooslustes. AM-seeend mõj muid ökosüs komponente ja seeläbi kk-protsesse kliima

iomycetes. Kultuurimorfoloogia liigirikkus jäi alla ITS rikkusele. Kultuuri morf ja ITS ei vastanud üks-ühele -erinevused mõlemas suunas, vaid 54% vastas üks-ühele. 90, 9:  
lehe-endofüütide: diversiteet kasvab ekvaatori suunas; peremeestaime rühm ja sademed pole olulised. Troopikas OTUdest Sordariomycetes, Dothideomycetes; temp-mets :  
samblikega seotud seened on fülogeneet allikas taimede endofüütidele. Endofüütide ja parasitide vahel palju üleminekuid; saproobsuse paljukord

Hymenocypuse kompleksi pole lehtedest kunagi leitud; Cenoc on leitud ka lehtedest. Lehtedes ja vartes on palju samu liike, ent lehtedes siiski k  
troopikas lehtedel: tähtsus, mitmekesisus. Domin SordarioM ja DothideoM seltsid; entomopatogeenide tähtsustamine endofüütidena: nii elutsükli  
ses

loidid on kohast pikamaalevikuks ja ellujäämiseks mullas; Rhizopogoni eosed palju säilivamad kui Suillusel

ii. Pomaderrise juurewd domin eukalüpti üle mulla ülakihis. Arv see on v tähtis konkureerides noorte eukalüptidega, mille juured eelist sama sügavust  
ort purpurascens (ka Pomaderrisel). Ektendo-tüüp siledatel (sh Clitocybe, Agaricus, Mesophellia, Cort radicans). Mesoph: kahe klaasi vahel EcM süntees

kurendid kõrgemal. Arv er aastatel söödikute saturatsioon on põhj dominantust uues kasvukohas Aasias. Hübridis harva. Liigiteke allopatriline; SE-Aasia dipterokarbid jē  
Lact brufuselt saadud MHB stimul EcM mood Lacc bicoloriga. 2 tü

Arhede kooslust globaalselt ei mõjuta miski peale soolsus

us edasi mikroobid hakkavad allokeerima N-ensüümidele. Seega enamikus kooslustes on C:N 18-20 on piir, kus edasi mikroobid hakkavad allokee

ent T-RFLP v vilets. DNA konts enne PCRi ei mõj, ent tsükliite arv mõj: 20-30 tsükliit - ei saa kõiki liike kätte; 50 tsükliit: tekivad artefakt-liigid ar  
grikkuse hindamisel, ent võib võrrelda erinevaid uurimispaiku

Terfezia clavaryi, Terf boudier

M Afzeliaga

vs juureproov; tuubid: metsamuld: ECM diversit

Petri tass erinev substraat

s ECM-seened

AM network hoiatab teisi seotud taimi lehetäide rünnaku eest, mille järel taimed eritavad keemilisi ühendeid, mis peletavad k

ii ei kuulu.

sl, kelle seemnete tihedus on suurem; fungitsiidide kasutamine suurendab taimede dominantust ja vähendab elurikkust

s käigus tek fenoolide lagund. Madal redokspot ei võimalda lakaasidel lagundada kompleks-aromaatühendeid ebatäpsust (ei sobi ABTS), kõdulagunemisjääd on 3 a pärast lagunemise algust energeetiliselt mittetasuvad; arv et laguens akt tõus EcM seentel

sagedus ja ohtrus sõltuvad positiivselt genoomisuurusest ja Tuber borchii -kvantit PCR

l mullas olevate bakterite eri kõrrelised mõjutavad mullas olevate bakterite ja seente biomassi PLFA järgi eri kõrrelised mõjutavad mullas olevate bakterite ja seente biomassi

rim niiskes, N-väetamata rohumaal; kevad>talv>suvi>sügis. Seente osakaal väheneb N-väetades mikroobide arvukus suurim niiskes, N-väetamata rohumaal; kevad> talv>suvi>sügis. Seente osakaal väheneb N-väetades aepalset liigirikust (supresseerides absol dominante), vähendab prod; vähendab mullas seente suht osakaalu ning kiirendab N ringet

mikroobide biomass suurem prim suks aladel lepa, Equisetumi ja F

; allopatriline, sümpatriline ja peripatriline liigiteke; raske arvestada liikide levila muutumisega aja jooksul; arv tekkivad liigid peaks asustama eri nische, ent see pole alati niilised ja ökol muustrid; tasub edasi uurida molekul tasandil

b nematoode, kogu protsessi kirjeldus, pildid, eritab pleurotiini (bakteritsiid) ja ostreatiini (nematitsiid)

DS: anatoomia, värvimine sudan IV-ga, värvipildid; mikroskleroosiume palju talvel, kevadtalvel; pigmenteerunud hyyfid kevadtalvel ja kuival suvel, hyaliinsed hyyfid kev

DSE: Aspergillus ustus -voimeline omastama fosfaate mineraalidest ja neid taimedesse transportima. Värvimismeetodid Sheffe ja Sudan 4ga

DSE/Bouteloua. DSE v mitmekesise morfoloogiaga, kolonisatsioonivormid aastaajati erinevad, koloniseerib ka juhtelemente ilma patoloogiliste sümptomiteta, DSE mood

sed Austraalaasias levinud klaadile

invasiivne sinep Alliaria mõj AM seente kooslusi Acer seemikutel ja vähendab kolonis.

illumina masina abil mass-sekv mõlemast otsast; said plat

logaritmiline), seda suurem on nestedness.

os eksponentsiaalselt liigi suhete arvusse

NA; Pinus vs Eucalyptus: metsade vahel olulised erinevused

listasid põletamata või harvem põlet alasid

Petri tass

juured vs lehed Lepanthes orhideel. Mõlemis domineerivad Rhizoctonia-Ceratobasidium? Ja Xylaria ilma oluliste erinevusteta. Seentel ei tähel antagonismi ja väikeses juu

Populus, Salix Arizonas: niiskus seletas kõige rohkem koosluse varieeruvust

puuvillataimede juured kult + sekv: Fusarium spp, Nectria, Gliocladium, Diaporthe, Cladosporium spp.

1 seosed homoloogse probe seondumiseefektiivsuse vahel

petri tass > klaas

Hymenoscyphus: s  
proteiin-poliifenoos

Hymenoschyphus, Oidodendron: korralik ligninaasne aktiivsus  
MHBdel väga erinev spetsiifilisus just seente suhtes. Mõni EcM on

des L-Euroopasse jäänud pop-dest! Euroopasse on alles jäänud need puud, mis elavad üle jääajad ja soojad jää-vaheajad L-Eur efüugiumites!; Eeln

Frankia ja peremeestaimede fülogenees ja biogeograafia. Lahatakse

lgi

ga hüüfid 390 Ma 5 pannaal 290 Ma; 6 imetajate soolestümbiondid 150 Ma, 7 vatsaseened 40 Ma; 4 iseseisvat viburi kaotust; kanseened vs kottseened 500 Ma; pärmidel pu

diversiteet, fülogenees, palju gruppe, sekveneeritud LSU. Sh. Sebacinaceae, Phialophc

protroof nii turbasambla kui laukude surevatel lehtedel, männiga ei oma mingit biotroofset suhet

ine + BOX-PCR + sekv diversiteet, mis antagonistlikud Verticilliumile, maasika vs rapsi risosfääris vs bulk soil; 3 ala. Nii eritaimedel kui eri aladel domin eri seente klaad

Lithocarpus densiflorus endof: Lachnum sp, Phialophora sp., unkn sp; taksonitest Helotiales, SordM, Capronia, Umbelopsis

Erica arborea saab mullast ErM seemed kätte kui on kasvatatud pinnasel kus ümber po  
esinevad tamme endofüütidena, laborikatsed

sed: mida suurem ala, seda liigirikkam. Saarte biogeograafia

tsüaanobakterisümbiondid taimedel ja seentel; Samblikud,

ooseksist pop-dele?

abiomassi kalkuleerimine pole veeseentel usaldatav

kasulikum kahest AM sümbiondist saab taimelt rohkem C kui seened on ruumiliselt eraldatud. Arv ruumiline stratif võimaldab AM diversiteet: peremeheelistus läbi 2 polvkonna  
üks vähestest näidetest, kuidas yht taimeliiki armastav AM-seen pole talle nii kasulik kui on teised, talle mittemeeldivad seened

tiivne tagasiside domineerib positiivse üle, mis põhjustab muutusi muustrilises

taimede biomass ; koosluse str. Enchytrae puhul Lotus ja Plantago olid peremeheks v spets liikidele. Biomassilt: seened>Bact>Vihmauss>AMF>Coll  
pott

us, Inocybe, Tomentella; C. Rubra: Tomentella, Phialophora, Leptodontidium; Epipactis atrorubens: Inocybe, Phialophora, Sebacina, Tuber, Tulasnella, Wilcoxina; Plathia  
ek Aneura seotud väga lähedaste isolaatidega. Paljud Aneurad jt perek seotud üsna erinevate isolaatidega NM gruppidest. Enamus perekondi seotud  
kambriline, CO2 löksudega

#### Monotropoid

AM diversiteet-epiparasiidid spetsialiseerunud kindlale klaadile.  
Mükoheterotroofide evol ökol: fülogenees, toitumine jms

ia, Rhizopogon, Gautieria. Uurimise pikk ajalugu. Jutustab ümber 19 saj teadlaste töid; PILDID. Mikroevolutsiooni tähtsus spetsialiseerumisele kluum teema. Mükohetero

i võrdlemine rarefactioni abil

sd Weissi toodega. Arv et Ceratobasidium on polyfyleet, aga põhiosa asub kukeseente klaadis. Arvavad ka Sebacinaceae kukeseente klaadi koos Tulasnelladega sarn Brun  
olitus, Gyrodon, Boletinellus) + (Boletus + Xerocomus + Phylloporus + Tylopilus + Strobilom, Retiboletus, Leccinum); analüüside põhjal Suillus on tek Rhizopogonist.!

kõvas kivis Ophioparma-sambliku all. Sugaval kivimis sambliku-seene hüüfid, Hymenoscyphus ericae aggr., harva teised kottseened

s, Trametes, Fomitopsis  
näidanikuseentele vastup.

ik Phellinus pini poolt: iseloomustus + biokeemia

id: ülevaade

ka lisand; viited teistele indiaanlaste seenekasutustele

#### Petri tass

avah võrrelda, ent K abs-väärtusel pole interpret okoloogias

lest

AM kolonisatsioon eri suksess aladel erinev: põllumaj-maadel madalam ning ruumiline heterogeensus kõrge, preerias ja metsas kõrgem ning ühtl



t, *Lactarius quietus*, *Russula cyanoxantha*, *fragilis*, *lutea*, *lepida*; *Sclerod* vulgare mood EcM *Quercus* sp-ga eoste polükultuuridega, inokul-aukude

Crenarchaeota EC xxx

termofiilsetele bakteritele ja arhedele Siberi naftamaardlate õli-vee :

erinev ja konvergentne v.a. troop saartel kus looduslikke põlenguid ei esinenud -seal üksikud invas-liigid

algloomad suurendasid taimekasvu, juurte pikkust ja eripikkust

*Basophyllum*, *Diuris*, *Disa*, *Thelymitra* -Tulasnellales, sh isolaadid hoopis teistelt taimedelt ja kaugelt L-Aafrikast efektiivsed

er seevastu kannatas nii juurkonkurentsi kui EcM vorgustiku tottu (parim kus polnud ei juuri ega niidistikku). Arv et EcM seened hoiavad ara AM puude pealetungi. Arv o

ud India kaudu Põhja-poolkerale ja Kolumbiasse (cf. Halling1987). Arv Rozites tek ekvatoriaal-aladel, kus üks osa läks kohe põhja, teine lõunasse

ikidest. AUS v palju hüpog endeeme. AUS liigirikkuseks hindab 1278-2450 ja NZL 193-232. Eri rühmade biogeo mustrid. NZL-sse eukalüptidega sisseveetud liigid asustas ka mürdilisi

Epacris AUS: kultuuris ja juure-DGGE domin Helotiales, ent palju ka kan

RhodoD AUS: kultuuris domin Helotiales ja Xylariaceae (NM). Paljud He

kitinaasid: AUS ErM isolaatidel esineb kitinolüütiline endo-ja eksoaktiivsus, samuti

AUS ErM isolaatidel esineb kitinolüütiline endo-ja eksoaktiivsus, samuti mitte-ErM er

*Calluna vulgaris* ja *Vaccinium myrtillus*: sarnased seenekooslused. Erinevused tulevac

ermifera

aaab ka EcM *Ceratobas* kaudu mullast.

Epacris pulchella: 2 taime ErM mitmekesisus: kultuurid (vähem liike) vs sekvenerimii

Rhododendronil Austraalias: 3 taime: domin *Hymenoscypha ericae* aggr., muud Helotialese

makrofauna kohalolek vähendas tugevasti AM kolonisatsiooni

suur ökoton

peremehed v substraat. Somaatilist mitesobivust ei pruugi olla, er allopatrilistel juhtudel. Mol andmed pms suudavad eristada patotüüpe

Phialocephala fortinii: Leedust veel mitu uut krüptilist liiki

ia polnud seega kunagi isoleeritud nagu varem arvati. Põhja-India oli ilmselt suur poolsaar v palju saari, kustkaudu levisid Indiasse ja Madagaskarile ka Aasia vormid. Nalj 7% järgi. Korralikust herbaariumis on võimalik saada väga palju oma keskkonnaproovide heaks

se korral annavad vähem kui peaks

palju piiratum. Callistemon on osake Melaleucast. Tasmaania Melaleuca ja Callistemon. Uus-Kaledoonia Callistemon monofüleet, lähedane N-AUS liikidele. Beaufortia :

ing forest biodiversity experiments: general considerations. illustrated by a new large experiment in subtropical China. MethodsEcol Evol. doi: 10.1111/2041-210X.12126.

leniaceae mood AM ja üksikuid viletsalt arenenud EcM juuretippe, mida ei loetud päris EcMks -sellekohane kriitika Warcupi ja McGee aadressil;

inokpot AUS: v tugev ruumiline varieeruvus, mulla häirimine vähendab vaid veidi

EcM vs AM inokulumi potentsiaal  
inokpot AUS: v tugev ruumiline varieeruvus

ides: sümbioos täiga (aphid) Meliarhizophagus fraxinifolii, mis sööb saare lehti ja juuri. Seene sklerootsiumid täikolooniate ümber. Arv täi saab peagi eri taimedel vahtrametsas sesoonselt

evolutsiooniline mükoriisa teke

evolutsiooniline mükoriisa teke

idetest -ecm puhul tu 86% taimeliikidest mükoriissed, sh 74% AM, 9% OrM, 2% (6000 liiki) EcM, 1% ErMülevaade taimesugukondade ja elutüüpide liitlus, Scleroderma, Castoreum, DescoM, Hydnangium, HymenoG, Hysterangium, Mesophellia, SetchellioG, ThaxteroG, LabyrinthoM, ReddelloM, Englerodendron, Monopetalanthus jpt, ent mitte Macrolobium; II Macrolobieae2: Paramacrolobium, Cryptosepalum; Macrolobieae3: Dicymbe, Polystemonanthus

domineerivad

kasvatasku C-paberiga

Omavahel esines pos koeksistents -arv vertikaalne nishihõive. Viljuvad eri aegadel

Hebeloma sp võrdlus eri in vitro tehnikate vahel

NH4 oksideerivad bakterid on mõnevõrra erinevad looduslikus pinnas

. Idanemiseks pole vaja seenega otsest kontakti -piisab kui seen kasvab tsellofaanil, mis katab söödet. Agarisse siiski püsivaid idandamist soodust ühendeid ei jää kaob vabade nishide tottu.

Rhizopogoni eosed idanevad

ECM diversiteedi põhjustaja

cybe piceina -v õh mantel ja vilets HN), Lactarius spp, Pisol EcM sünt männiga. FAIL: Agaricus camp, Lycoperdon, Hypholoma,

misel: olulist vahet polnud lagundatava oksa lagunemisastmes, kuigi koniidide produktsioon oli erinev

USA

Cellulohüdrolaas oli A1 ja A2 horisondis rohke, kitinaas puidusodis. Kõik puidus olevad morfotüübid omasid tugevat kitinaasi aktiivsust, er Tomentella spp.; lakaas

Lolium perenne, Neotyphodium lolii vs Listrionotus bonariensis (herbivoor) vs Microctonus hyperodae (parasitoid). Mükotoksiinid mõjutavad läbi herbivoori ka parasitoidi Neotyphodium-Festuca süsteem. Endof eri tüved induts eri tasemetel konstitut resist ning ka haava-induts-resist. Kohalik tüvi parim. Peale vigastamist on seeneta taimed v

petri tass

Bakterite mitmekesisus mükoriisadel. Eri seeneliikidel po  
mäni EcM juurtel: pms Alfaproteobakterid ja aktinomütseedid

itud koosluses ei suutnud T-RFLP tuvastada mitmeid haruldasi liike  
tuvastatud!!!

Hymenoschyphus

sümpatrilistel vs allopatrilistel liikidel. Kandseentel presügootne äratundmismehanism, kottseentel postsügootiline (hübriidid viletsad). Seentel peamine liigiteke spetsialise

acollybia: vs lehtede kitkumine vs raiumine vs mõlemad. Mõju 2 seene suhtelisele arvukusele on pöördvõrdeline

el: koloniseerib nii juuretippe kui ka suberiseerunud jämejuuri nn valkja kattega. Identif septade ultrastr järgi. Mantel paks, Hartigi võrgustik vaid 1-kihiline!!!; väidet ECM  
ccaria laccata. Puhaskultuuris Pax > Cyl > Laccaria; Cyl inhibeerib mõlemil, eriti Laccarial ECM teket -mantel on õhem ja hartigi võrgustik on imelik. Cyl tungib läbi Lacc

ostis, definitsioon; mitmeid eritüüpe tekke järgi. Bakteritel, kandseentel ja kottseentel erinev melaniin. Bakteril neutraliseerib toksilisi fenoole, seob rauda ja kaitseb H2O2

terunis, servade poole vähem. Palju liike kattub, ka Madagaskariga. Omapärased liigid Zambias. Pilvikui on Aafrikas kõikidest seksioonidest, eriti basaalseid, mida mujal

on diferents risomorfid

ECM biodegradatsioon ja lignolyys:ylevaade

peremeestaimed, võimalikud sidemed, seente ja kanarbikulaadsete raskemetallide talu

Cadophora finlandica ja Phialocephala lagund tselluloosi jm polüсахhariide

AM seente tapmine benomiüliliga soodustab invasiivse Centaurea sissetungi konkureerides mõne taimega, samas vähendab seda mõne muu taimeg  
eerikas (pärist Euroopas Centaurea vohamine Ameerikas (pärist Euroopast) võib olla seotud AM-seentega, mis pole peremehe-spets ning peremehe-spets patogeenide puud

a MHB mobilis paremini Fe ja P kui bulk mullas; bakterid sügavamal mükorisosf mullas efektiivsemad mükorisosfääri seened ja MHB mobilis paremini Fe ja P kui bulk m

Phialocephala fortinii ja Phialophora finlandia suudavad lagund polüsahh tselluloosi, tärklisi, ksülaani, rasvhapete estreid, valke, mitte aga fenoolseid struktuure

Reduts lehtedega AM Genticaceae on miksotroofid 13C ja 15N põhjal ja N konts baasil

5N ülekanne. Seenest Gly ja taimest CO2 märgist kujul. Seega rohelistel orhhideedel mutualistlik mükoriisa. Juhuslik leke välistati. Palju Gly C-st hingati välja; EmH-sse l

omycota, Plasmodiophoromycota. Korgematest seentest pole toendeid. Ülevaade

Haplomitrium (maksasammal): mükotroofsetel jätketel v tihed AM kolonisatsioon: arbuskulid, vesiikuleid ja longitudinaalseid hüüfe pole; spets unik

tav Michaelis-Menteni võrrandiga, kus on selge platoo-efekt

tema

alpsaimede juurte endofüütide määramine: kultuur\_RFLP\_sekvents. Domin. Leptodontinum, Cistella, Lachnum, Phialophora

hüdrobioloogias peb mikrokosmostega äärmiselt  
hüdrobioloogias peb mikrokosmostega äärmiselt

Lehe-endofüüdid: kõrge mitmekesisus mikroskaalas ja lai levik kõikjal  
endofüüdid: ülevaade

vähene poorsus suurendab bakterite BS väikeses skaalas,

juurtes erineva maakasutusega aladel (kultuur + ITS region): odrapõllul ja nisupõllul eri seened, nisul sõltusid sellest kui kaua oli eelnevalt seal nisu või oder olnud. Mid

männilistel; % koloniseeritud  
männilistel koos vesiikulitega, eriti rohtunud paigus tõusmetel

a- ja kartuli spets tüved omaette rühmadesse. AG sees on somaatilise mittesobivuse rühmad, mis koosn isolaatidest. Seal eri isolaatidel eri AFLP muster, v sarn muster ja gi

AM seente metauring ITS põhjal: 90% fülotüübid - mandritel v palju endeemsust. Biogeo ja taim kumbki mõj r >50 seente l  
Network teooria AM seentel Öpiku andmestiku põhjal: moodulid ja pesitsi paigutus

Frankia: mullaolendid, kes fakult asust juuri; mullast ei su

17 taime juure-endofüüdid ITS: tugev kattumine, 34 OTU, domin Helotiales. Erikoidset mükoriisat mood vaid mõned Helotiales seltsi esindajad. Samad isendid mood enc

ridisatsioon. Valepaardumised ka 40% sarnase DNA puhul; protokoll antud

ta

enes peale põlengut osakaal EMH ITSs suurenes peale põlengut

kasvuhoone

ii ja eukalüpti eri liikidel nii kolonis% kui taimekasvu stimulis. Soovitavad muude puude alt korjatud Sclerodermasid eukalüptide inokuleerimiseks mitte kasutada suure

vs ECM eukalüptidel. Suktsessioon

hizopogon

bakterite ja faagide kooslused on tugevalt seotud; protistid

gev mantel; Monotropa mükoriisa, Arctostaphylose arbutoidse mükoriisa kirjeldus; *Moneses uniflora*, *Pyrola minor*, *P. rotundifolia*, *Orthilia secunda* arbutoidse mükoriisa

ne inokulatsioon on aritmetiline keskmine. *Laccaria* oli algul rohkem, ent vähenes kiiresti *Rhizoglyphis* arvelt  
malt kui teised seened

ECM seened poteroositas: pal

Russuloid, *Inocybe*

liigirikkus bakteritel veeaugu suurusel sõltub

lad Rhodopolioid ja *Prunuloides* klaadides 2 rühmana

bakterite fylogeneesi ja systemaatika probleemid, eriteooriad, kohad

limiteerivad toitained mõj mükoriisa kasutegurit. AM on pos mõjuga kui N/P üle 14. AM pos efekt kaob kui P-rikas mulda N  
parafüleetilisuse või incomplete lineage sorting fenomeni tõttu; K2P distantide asemel tuleks kasutada toor-distantse; bootstrap väärtuste ületähtsust

muudetava paksusega

xxx

tubes, perliit, probleemid

Tuber himalayense, T. Indicum

fide hulk on maa sees kiirem kui maapeal

i kordust

as

i, mis on vastavalt ITS1, ITS2 ja ITS3 analoogid

EcM seened väidet. Kolonis sõnajalgu NZL kui läheduses on Nothofagus v mänd. Kultuuridega nakatumine ebaõnnestus; lep

lehtel/s kasvavatel seentel kooslusi mõj pöõgi isendite geneet kaugus (Mantel) ja puu-siseselt lehtede kaugus

esti ära kasutada

AM, EcM, ErM puittaimed erinevad C-ökonomik AM, EcM, ErM puittaimed erinevad C-ökonomika poolst - kasvukiirus,

16S rDNA geeni koopiate arv kõigub AM-seentel 2-4 korda Glomus intraradicesel

CO2 mõj kooslust 3,5%, osoon 0%; ent katse-aasta mõjutab 42%. S.t. samal põllul eri aastatel võib AMF kooslus suurel mää

mikutel võrsuda ja regul taimekooslust; kliimamuutuste mõju on raskesti ennustatav, ent arv kasvab rohke mütseeli tootjate hulk; mide tootmise osakaal erineb ligi 10x

irtel palju madalam akt kui EcM juurtel

ja Lact quietusel on sam fosfataasi ja lakaasi akt mustrid -arv sama funktsioon; Xerocomusel muster erinev

poolitatud juuresüsteem veestressi tekitamiseks

um (Stutz), Potentilla hyparctica (Bledsoe); Kobresia myosuroides

tuub

vihmametsa liikidel. Miotseenis olid levinud ka SE aasias, NZL, Patagoonias koos Casuarinaceae-ga

ae, domin kõrrelised, Asteraceae, Eucalyptus, Acacia, Casuarinaceae. Eri ajastutel domin rühmad radieerusid just oma ajastu algul. Kliimamuutuste algul immigr. Adansonia

e. Keskosas vähe endeeme, sest jääajal kliima muutlik ja kitsad endeemid surid välja

se samuti eelistatult. ARISA ülehindab kõvasti liigirikkust

una liigid stimul või supresseerivad eriseeneliike erinevalt. EI K INTERAKTS stat anal-s

hannon BD suurem rohumaadel kui metsas; koosluste vahe rohumaadel ja metsas on suu Seente ja bakterite Shannon BD suurem rohumaadel kui r

ia, Koenigia)

Agropyron: pott jaotatud väetatud ja väetamata pooleks või ühtlane väetus: taim saab sama efektiivselt kätte 15N kui NM-taim; 33P vähem. AM s

Agropyron: kahes kambris -taimekambris olev mittemükoriisne taim saab sama efektiivselt kätte 15N kui AM-taim sealt kuhu juured ei pääse; 33P

opropanool parem kui teised (vahet pole, kas +20°C vs -20°; 1h vs 18h)

'sus

ivsus tõuseb 2-3 korda defol. Aladel

1. Uniflora: Russulaceae; Sarcodes sanguinea: suiloidid, kantarelloidid

kanarbikulaadsed: ektost erikoidse, arbutoidse ja monotropoidse hypoteetiline teke

Epacris vs Leptospermum AUS: mõned juure-endof liigid kattuvad. Ühe k

ium orchidicola, Epulorhiza, Ceratorhiza, Sistotrema, Moniliopsis

notus, Moniliopsis, MRA, Sebacina, Thanatephorus, Tulasnella, Xerotus.

-parasiit, parasiidiparasiidi koevolutsoon; väga sarnane

50/ml; muld: 6400-38000/g, 4\*10<sup>6</sup>/t, muld glob>4.5\*10<sup>6</sup>; meres kogu: 2\*10<sup>6</sup>;

õrgem: arv. Seotud pare: AM taimedel virionide produktsioon märksa kõrgem: arv. Seotud parema kasvuga

x

vajadus

ltuuris ektendoMR õhukese mantli ja pooliku hartigi võrgustikuga. Sage rakusisene kolonis; ainult männilistel; Arbutusel puudus

Myxotrichum setosum, Pseudogymnoascus roseus, (mõl Myxotrichaceae), Gymnascell

spesiaalne õhuvoolutiga steriilne

il viljakeha tükkidega

potid

idosporoide järgi, hüüfiseinte ornamentatsioon. Vrd kandseentega tundlik benomüülile; ei soovita kasut nime Complexipes moniliformis; arwab, et tegu Geopora, Trichoph

a. Sphaerospora, Anthracobia, Trichophaea ei mood ECM ega tunne huvi juurte vastu

nkeri, Tricholoma, Astraeus, Lactarius, Laccaria, Tricholoma + lühikirjeldused; Coltricia: vs ECM moodustumine, viljake Erlenmeyer

nteraktsioonid, ülevaade

Cladophialophora spp nov sammaldest

sammaldest seened: sõltub v palju liigist, koest ja aastaajast;

väheneb kui taimel on poolparasiit, AM soodustab parasiidi koloniseerimist

ooniga kaasnes kaasaegsete troop vihmemetsade teke

Xylaria endofmaksasammaladel ja õistaimedel omavah lähedased. Vaid risoidides, mitte talluses. Endofüüdid mood Xylarias omaette klaadi. Arvatavasti on Xylariate endo:  
maksasammalde risoidide endofüüdid: seenekooslused erinevad suureneva distantsiga, ent latit gradienti pole. Peremehe-spetsiifikat pole

ajude, männi ja kastaniga sisse toodud palju muid seeni. Nimekiri EcM seentest, puidusaproobidest; vrd ka muude troopiliste aladega; rohumaade l

igid samuti

ri Thanatephorus-sümbiont mood EcM eukalüptil

Clinonia borealisel: praimeritega 92 RFLP tüüpi, mis lõpuks andis 10 AM Glomuse haru. Eri metsatüüpides liigilise koosseisu muutust ei olnud. G

:onkurente võõr-taimeliik

acalyptusega, ent ei mood HN ning tapavad Casuarina equisetifolia. Eukalüpti kasv suurenes 13-32 korda, Allocasuarina max 3x, Casuarina max 2 korda. Casuarina juured  
ja toitainete eritamist, mis induts VK arengut ja toitaineid

. Cf. Melaneum on hübriid.

meesringiga v a L aurantiacum s l. Arv evol vanim peremees kask v haab, hiljem tek juurde pöögilised; kanarbikulaadsed; männilised. Peremehe vahetamisega on kaasnen

sots. Urtica dioica ja Epilobium angustifoliumiga. Arv. Juhuslikult levinud veesportlaste meeskonnaga NZLst



jendamine suurendas C liikumist. Mida suurem oli saaja-taim, seda rohkem temasse liikus C. Juunis kui lehed puhkesid, liikus rohkem C, viidates

parasitoididele mõju

ja infestans, *P. Alni*, *Cryphonectria parasitica*, *Batrachomyces*, jpt

geensused vs sümbiootilisus

benomüülil väh kolonis; kolonis väiksem karjatatud alal; taimele N, P olid kõrgemad kui karjatatud kui ka benomüülita paikades; karjatatud paigus vs ECM (antagonistlik v.a. *Hebeloma* sp) vs *Rhizoctonia* (t).

Pi, ilmselt kvantit ei saa anal, andmete analüüsimine, tüüp I ja tüüp II viga, soovitat kasut +1 bp resoluts. Hea meetod, kuna võimaldab suurt replikatsiooni ja sõltub hilisem koosluse struktuur ja massikadu

eriti mitte-ECM puude läheduses tammel

toosperma (tõenäoliselt peitliigid)

ECM eukalüptid on konkurentsuvõimelised kohalike puudega vrd. Arv et eosepanga kogunemine on oluline eukalüptide muutumisel invas-ks.

tab taimekasvu

spetsialist

õr vs mitte, saavad erineda tähtsamad muutujad mõjutajateks. Autokorri arvestav mudel pöörab rohkem tähelepanu mesoskaala protsessidele; eri

alustoreid saab kasutada teistes multivar analüüsid

vulgare, *Tylophorus chromapes* sünt *Pinus taeda*, strobilus.

*Arachnitis uniflora* mykoriisa morfi koos AM seentega; juurte sigipungad koos seenega

*Arachnitis uniflora* ja *Glomus A* arbuskulite-vesiikulite moodi moodustiste ultrastruktuur

perspex plaadid

sid pms >30 MAT tagasi üle Atlandi või on suured jääaja väljasuremised muutnud vähemmõj NE Am ja SE Aasia sarnasemaks;

innanguid ja optimisuukske ΔE

korrel mudelit ei või ekstrapoleerida suuremale alale või teistele objektidele

testida läbi erineva täpsuse ja efektiivsuse. Taimede autokorr väiksem kui loomadel. Soovit esitada nii ruumilise kui mitte-ruumilise mudeli

andasad lehe osm pot. Teatud ajal päeval. Efekt polnud seotud parema taime toitumisega. Arv et suurenenud C-nõue põhj suurenenud FS

>160 000 km<sup>2</sup> (ligi 40% kõigist kommerts puuistandustest); AUSs looduslikult 320 000 km<sup>2</sup> metsamaal.

pp põhja-Am ja vähem ka saartele

AFLP põhjal mikrosatelliitmarkerite ning SCAR praimerite tegemine. Efektiivne, kiire, ökonoomne, vajab vähe, ent puhast DNAd. AFLP>hübriid: last proovist

iringid -keskelt sureb, akt rõnga läbimõõt 30..40 cm; jaguneb 3 osaks: 6 cm risomorfide front; tihe mütseeli front; hõrenea ja sureva mütseeli front. Kasv looduses palju ki

seosega liikidele on elupaiga fragmenteerumine eriti drastiline

arv, et mikrokosmostel on suur tähtsus hüdrobio

AM seened hoiavad õhulõhesid lahti ja lehe turgorit kõrgel

Treubia -algelisimaid maksasamblaid on v keerulises assotsiatsioonis AM-seentega. Diferentseerunud koed ja tugev AM-hüüfide mass visualiseerimine DiOC6 abil.

Jungermanniaceae, Aneuriaceae: kandseened

maksasammaldel

vaid Acacia sect Phyllodes (syn Racosperma; Austraaliast) mood EcM. Koik akaatsia liigid mood AM. Senegali istandustes domin AM; tihti EcM

erakkude surm kui keskkonnas liigselt C

Petri tass

Petri tass

Dominantsus AM kooslustes on juhuslik protsess, idiosinkraatne ja ei sõltu fülogeneesist; log-normaalne (75%) ja broken sti pH gradiendiga mullas: ohtrus kattub kõige paremini zero-sum multinomiaalse jaotusega. Võtsid arvesse ruumilist autokorr ja loma alborunneum, Tuber borchii, Xerocomus badius: esmane EcM süntees eostest või kultuurist. Boletus pinophilus, Gautieria

bakterid 16S rDNA: BD, BD näitajate modelleerimine, proovisuuru

Laccaria laccatalt isoleeritud bakterid stimul vaid L laccata ja L bic

õletamine vs lageraie vs valikraie

kolb

inaktiveerimine, hapestamine, võitlus teiste seentega, patogeenes, ligninaaside toetamine

taasidest

bakteritel inimese soolestiku eripiirkondades: suurim erinevus eri in

RE, praimerid Borneman 2000. Seened mullast. DNA extr SDS + PVPP. Sepharose. T-RFLP sarn-limiit 1.25. PCR produkt vaja puhastada ja RFLPk sama kogus. Piigi

tüotidest domin seened, eriti Malassezia ja Cryptococcus-sarn pärmid;

bia centrifuga -vanade kuusikute liigid: eoste langemine ja idanevus palju arvukam Põhja-rootsis kus vanu metsi palju. Monokaartiõniga asustatud puutükkide eksponeerin  
ndud puuketastega agari asemel: säilib kauem, reostub vähem

var enamasti väike probleem, ent enamasti v vähe isolaate samast liigist analüüsitud

sh2

Glomus: komp kvant PCR  
tammel, %koloniseeritud, vs ECM

V tetraspora, arv et mõni liik võib veel olla

ateerimine: sõltuvus keskkonnast, eksploatatsiooni def Bronstein2001 jr; stabiliseerivad mehansimid: geneetiline uniformsus???, vertikaalne ülekandmine, parasiitide rohkus, st  
troofsus: Rhizina, Pyropyxis -tugevad patogeenid, mitmed on norgad patogeenid (Geopyxis carbonaria, Gyromitra infula; Tricharina praecox var. intermedia); sümptomite  
lanevus ja idandite ellujäämus vesiagaril: Seemnete idanevus inh Caloscypha fulgens. Idandeid kahjustasid Pyropyxis rubra, Rhizina undulata, Ascobolus carbonarius. Tri  
amüloosi, amülopektiini, pektiini, ksülaani lagundamine. Peroksidaasid kõigil; türosinaasid, lakkasid varieeruvad liigiti, isolaaditi

lioksidaasid, ligninaasid, kiire kasv.

katkestati EcM jm kandseente sidemed.

1 Norilsk

sügavuti mullas bakterite BD väheneb ja kooslus muutub.

ise järgu tarbijatele ja detritivooridele võis taimede BD otsene mõju olla ka negatiivne. Taimede BD suurendab ka indiviidide arvu, mida ei ole SE

xxx

Frankia pott

Frankia x, turvas

Pyronema, Ascobolus, Peziza: eoste idanemist stimuleerib lühiajaline temp 50\*; aluseline reaktsioon; kasvu optimum pH 6-8

suudab idaneda ja kasvada vaid eelsteriilses keskkonnas, muidu jääb kiiretele hallitustele alla  
res (ei erine) ja redundantised (v erinevad); erinevad sidumistemp (tasub proovida eri Tm tõttu)

1 taimlates

Clavaria ???

skaalade ekstrapoleerimine, mikrokosmoste suu

[Redacted]

[Redacted]

[Redacted]

di; Suillus pole. pH otimum nakatamiseks Tomentelopis 4.5..6; Paxillus 4.5..5.5. Optimum teravam lupjamisel kui tuha puistamisel

[Redacted]

[Redacted]

endofüütide kasulikkus. Toksiinide tootlikkus ja mulla N rikkus. Mudel  
rohttaimede varre-endof.

inimese soolestikus bakterite kooslus 5 a jooksul muutub

raheseinu ei leitud

[Redacted]

iekasv (kõrgus, diam) kui kontrollil ja VK tek rohkem

taime juurtest tulev C indutseerib AM-seentes geeniekspressiooni ja N ülesvõttu; mujalt tulev C ei indutseeri

1 Choiromyces on Tuberaeae

Leptodontidium orchidicola isolaadid on endofüüdid nii kasel, kuusel kui potentillal, mittepatogeenne  
Leptodontidium orchidicola ja Phialocephala fortinii on endofüütset, mitte-MR seened

ed: levik noorendikes viljakahade põhjal

hõimkondade kaupa ökoloogiliste strateegiate ja nishi tuv

bakteritel: latituudi gradienti ei tuvastatud T-RFLP baasil.  
bakterite kooslused ja metagenoomid ameerika preeria jää

BD, biogeo jms: Võrrelda makroobidega v raske eriti täna

bakterid kõrgusgradientil: vahet pole. Arv mõj baktereid  
ojapõhja bakterite biogeo T-RFLP põhjal - distantsil pole

ti mullas: Im-ni seente biomassi osakaal väheneb 2x, algloomadel rohkem; aktinomütsetidel tõuseb 3 mikroobide levik sügavuti mullas: Im-ni seente biomassi osakaal vä  
im kõrbes; mullaloomadest domin kõikjal, eriti troopikas, vihmaussid (v.a. kõrbed, kus domin nematoodid)

eentele NS1, NS2) + klonereimine + ARDRA + sekv. Kuuse risosfääri bakterid ja seened on erinevad bakterid, seened, 18S (seentele NS1, NS2) + klonereimine + ARD

id kui juhuperemees kaotab palju C, ent saab vähe P

20\*20 klassika

20\*20

tsesalpiinilised pole ECM. Üheidulehelistest Kobresia ja Pandanus on ECM.

bonis lõppes puidu ladestumine osaliselt tänu Cl II peroksidaaside tekkele

obasidium sisaldavad kuni 30% melaniini ning seovad edukalt Cu, Cd, eriti eri saviosakeste manulusel

bidum eri peremeestaimedel

na EI MOOD EcM tammega ega polnud ka biotroofne (?) ja peeti saproobiks

juurepinna endofüüte on rohkem seenmantlis kui NM juurel; eri MR-taime-seene vormid mõjutavad endof levikut; Enim endofüüte kuulub Gymn

holmikpuu: normaalne Arun-tüüpi Am

MAT, kuigi radiatsioon oli palju hiljem: 60 MAT

ene endoMR sõltus substraadi toitaineterikkusest; alati ilma mantlita; polüspoorne inokul tekitas vaid VK-algmeid

Bacillus 2 spp: parandavad Pisolithuse kasvu, ergosterooli hulka; su  
varane vs hiline: Leccinum ja I

AM vs ECM vs non-MR-domin. Kooslused; AM seeneliigi erinev mõju eriperemeestaimedele (ruderaale inhibeeriv)  
AM seeneliigi erinev mõju eriperemeestaimedele (ruderaale inhibeeriv)

cM; Pyrola leiti NM Mükoriisatüüpide esmakirjedused: AM, ErM, OrM Mükoriisatüüpide esmakirjedused: AM, ErM, OrM, Monotropoid ja EcM

l, pärnal). Rõhutab EcM kasulikkust taimedele. Otsis EcM eriti trühvlike ümbert. Kirjeldas EcM mantlit, Hartigi võrgustikku, juurekarvade puudumist, tipmise meristeemi

asmius androsaceus: geneti suurus, paiknemine, konkurents  
iikide kooseksisteerimine: Mycena galopus ja Marasmius androsaceus näide

vast ja mittevõtvast analüüsist; eelduste mittekontrollimine; post-hoc hüpoteeside püstitamine; jääkide-põhine analüüs; lünklike andmete kasutami

Pseudomonas fluorescens: genotüübid mükoriisas, mükorisofääris  
P. fluorescens: doosiefekt, mõõtmine mullast, kasvatamine  
pressivad, et toimub geenide horis ülekanne bakteritelt seentele; sp

palmi lehtede endofüütid: oluline oli site ja lehe piirkond, ebaoluline aastaag

n NLFA16:1w5. PLFAsid ei tohi kasutada OTUdena.

oli juure-endof kasvades steeli rakkudes

Eostest seenekultuuride es

Kliima soojenemine ei mõjutanud juureseente liigirikkust ja mitmekesisust tundras. Erinevusi liigirikkuses ja koosluse struktuuris mõjutas happeli

asiteerivad eri Wynnea sp ja Entoloma abortivum il

a veesisaldus suurenes kui mükoriisid juured lõigati läbi:

is ja Juniperus kodus: replitseerimata. Eri seeneharud

iprodiioon vähendab taimede kasvu primaarsuktsessioonilises aimekoosluses

männiokastel: domin Rhytismataceae, Strumella (Sarcosomataceae), Phialophora (???), Elytroderma (Rhytism), Phoma (Pleosporales); seementel Cladosporium

seeneliigi (perekonna)-spetsiifilised, taimeliik ei ole oluline, supress

svama sama edukalt looduses nii mono-kui dikaartionitena, mõlemad sõltuvalt paigast võivad domineerida; invasiivsusel ja kasvukiirusel pole vahet; aastaga võib kasvada

e -LINGID, VIITED, PROGRAMMID hulk aktiivmuda jääkidel vs metsamullale rajatud istandikes

asvavad aluselisel pinnasel koos Quercus ilexiga sünt põhjal

d on väga liigirikkad; suur vae soolase ja magevee seentel

Sebacinales B: erikooslustes ja kõrgusvöötmetes; fülogeneetiline konserv mitmetes kooslustes, eriti häiritud tüüpides. Mõned Seb A liigid rohttain

teolepiota-Cystoderma, Cyathus, Crucibulum; Hebeloma-Alnicola sõsarperek Galerina, Gymnopilus ja Strophariaceae. Laccaria on tek tumedaeoselistest, ent on säilit paks

r ja Aus puudel. Chaliciporus mood ecm männil, aga mitte pöögil (joonisel kahtlane);

liikide eristamiseks jääb teatud rühmades ITSist väheks resol tõttu )Colletotrichum, Trichoderma harzianum complex). ITS jaoks peaks kasutama !

d ja mükoheterotroofsed orhideed üksteisest ning muudest taimedest

neg või neutr -+-võrd AM-seente mõju patogeenidele võib olla pos, neg või neutr -+-võrdselt

haabadel AM vs EcM sõltub mullaniiskusest ja niisutamisest. Optimaalse korral EcM, liigniiskes ja liigkuivas rohkem Ami. Eri genotüüpidel on erinevad

järgi monofüleetilised, mida seletab pika ajaga, et praagitaks välja teistele sarnased alleelid. PROGED

kanarbik ja Hymenoscyphus põhjustavad mõlemad allelopaatilist efekti samas potis ka

erikoidid inhibeerivad; taime P väheneb

kumidel eriti happelises .

k (43%) tasemel Panamas. Fülog distant v oluline. Mõj patogeene leviku efektiivsust

liikidel kasvas hästi

Eoste inokul seemnetele vahet

männi sterilis vs steriliseerimata juurtel: Steriliseerimata: domin *Cylindrocarpon destr*, *MRA*, *Fusarium solani*; Steriliseeritud: *MRA*, *Cylindrocarpon*, and *Serapias vomeracea* assots nii *Tulasnella*, *CeratoB* kui ka (vähem) *Sebacina-Serendipitaga* (mõl rühmad esindatud). Nelja liigi seenekooslus: *R. Delica* grupiga. Orhhideelel piiratud fotosüntees ja arv saavad lisa C seente kaudu  
seened; 18S RT-PCR+DGGE (bakterid, seened, AM-seened; 18S RT-PCR+DGGE + klasteranalüüs. Polnud bakterid, seened, AM-seened; 18S RT-PCR+DGGE + klasteranalü

osluste variatsioonile oli minimaalne

kasvatasku

Haaval. *Lact pubescens*, kase-spets *Leccinum* spp mood EcM koos rakusise kolonisatsiooniga. *Alpova* ja *Rhizopogon* ja *Suillus piperatus*, *Gyrodon merulioides*, *Morcel*

info; Probleem madala kvaliteediga sekventsiedega, mis ei taha klasterduda

vaade

lood mudeli baasil vüttes arvestades puude ja põõsaste lähedust ja basaalpinda; isetehtud tarkvara; eri patogeenerühmad reageerisid keskkonnale erinevalt. Nood *Cistus* spp juurte ümber sklerootsiume, kus elavad *Pseudococcus comstocki* täid. Viimaseid omakorda levitavad sümbiontsed sipelgad *ephorus Rhizoctonia* anamorfidega. *Thanatephorus* sees paikneb mitu rühma kus on nii 2-kui multituumseid isolaate. Viit nende ristamisele ja patogeensusele; mõlemil p  
ed

inokul



Petri tass: turvas+vermikuliit

kõrgusgradienti mööda. Madalal domin Cryptosporiopsis, kõrgel Phialoce

se ekstrapoleerimine, VIITED

kartulis: Verticillium dahliae, Cyindrocarpum destructans, Colletotrichum coccodes, Plectosporium tabacinum, Alternaria spp.

mügarbakterid: nende taksonoomia ja levik koos pereme  
a; Coltricia perennis, cinnamomea, foccicola -kõik seotud tugevasti lagunenuid puiduga ja samas mändide manulusega

mittekultivate bakterite tegevuse jälgimine ja tuvastamine: FISH, FI  
Frankia pop identif

eb piisavalt proove võtta nii lokaalse skaala kui globaalse skaala uurimiseks: tasakaal nende vahel

kuse pol põhjal -on seot pindalaga Austraalias, koosluste erinevus suureneb kaugusega; ent kogu Austraalia kohta vaid 100 OTU

Meliniom variabilis samu geneiteid leiti nii männi EcM-dest kui ka Vaccin  
Meliniomyces bicolorist eraldatud isolaat ja 2 Mel variabilis isolaati on su  
Meliniom variabilis samu geneiteid leiti nii männi EcM-dest kui ka Vaccin  
Hyphodiskuse klaadi 3 isolaati erinevad oma võime poolest üles võtta NH  
kasvatasku meetod

ia, Clavulinopsis, Clavaria, Trichoglossum, Geoglossum on väga madala d13C ja väga kõrge d15N väärtustega võrreldes saproobidega (Cystoderma Pleurotus) isolaadid olid võimelised tungima Ceratocystise rakkudesse, eriti toitainete puuduse korral

NAI

ides ei mood EcM männiga, ent muudab viimase juured kahveljaks

Phialocephala fortinii uued krüptilised liigid -peremehe eelistust neil ei tuvastatud. Olulised erinevused vana metsa ja majandatud metsa vahel. Majandatud metsas rohkem RFLP-põhised probed DSE (Phialocephala, tüüp1) populatsioonigeneetika uurimiseks. Phialocephalal kõrge polümorfism (Nei indeks), tüüp1-l madalam. Samad RFLP-pr Phialocephala: ITS vs RFLP vs ISSR: P fortinii on komplekslik koosn 4 mikroliigist, mis võivad olla koos samal juurefragmendil. Arv et toimub mikroliigi sisene rekomb, Phialocephala, Acephala, Phaeomollisia: endofüüdid nii juurtes, vartes kui lehtedes; ITS-fülogenees viletsa toetusega Phialocephala fortinii-Acephala applanata kompleks: lisaks boreaalsele võõtmele ka Kilimanjaro, NZL, Austraaliast, Antarktikast; Stoyke 1992 ja

Phialocephala: polüfüleetiline perekond

ISSR DSE: Phialophora finlandia - kultuuridest kuusejuurtest eristamiseks. Suurimad genetid väh 3\*3 m, genetid omavahel tugevasti kattuvad; samast proovist kuni 5 eri g

trühvel surub all taimkatet allelopaatia mitte parasitismi teel.

paljusid suhkruid puhaskultuuris; ei allu fungitsiididele

tuubid, potid

suletud, õhufiltritega

it on arvestatud

rad bakterite üle vees lehti lagundades; seeni eriti kõrge toitainete konts. juures

bakterite osa vähel spets vees lagundamise mootmiseks

palmi *Livistona* lehtedest: domin *Xylaria* spp. Jt *Sordariomycetes*

ay läbi lasta erinevate pesemistemperatuuridega, sest eri probedel eri Tm; külmhübridisatsioon  
oogiline kasutamine. Cartapip: vaikude, terpeenide jms pigi eemaldamiseks paberitööstusse minevast puidust.

spetsiifilisus

ite)

aprotroofsed omadused

Eri *Frankia* tüved v erineva efektiivsusega

idele

eostevihm monokartiootidele:

rhiza *bicolorata* (EcM), tüüp *M. Variabilis* (=variable white taxon) endofüüt palju *Meliniomyces* on uus parafüleetiline perekond, mis hõlmab Vralstadi liike. Sisald.Rhiz  
SVU

1 kõdu N rikkamast tüübist vaesemasse

erineval C-allikal, eriti Gly vs teised: bromouridiiniga rikastatud substraadid

lokaalses skaalas keskkond seletab 25% ja geogr distants

DSE: ITS + 14RE; avastasid et *Phialophora finlandia* ja *Chloridium paucisporum* (Wilcoxi isolaat) on sama RE-mustriga ja arv et tegu on ikkagi ühe liigiga. . Juurtelt leiti

bakterikoosluste RAPD

1 ja euk kooslused on mõjutatud mullahorisondist ja vs. Metsa maha võtmine; Üld-euk p mulla bakterid, arhed ja euk kooslused on mõjutatud mull

äidanevates eluspuudes: eriseened eri puudel erinevalt; mõjutab pos niiskus, temp

ligniini ja poly-koniferüülalkoholi lagundamine tugev vrd ECM seentega

2 DS, sh *Phialoscephala*

sed; organismirühmiti. Tugev ligninaasne aktiivsus vaid valgemädaniku kandseentel, kes toodavad LiP (lag eenduvid struktuure) ja MnP (aromaatset) terpreteerivad sünteetisid suhteid (Masui, McArdle), sünt *Lactarius deliciosus* männil us, *granulatus*, *porosus*; *Cenococcum*=*Mycelium radices nigrostrigosum*, 3 eri mükoriisaisolaati sünt männil; FAIL: *Chalciporus piperatus*, *Xeroc* 'agus, *Betula*, *Carya*, *Corylus*. EcM sünt *Pinus* spp.

fikro-kk võib olla oluline, er niiskuserikka sambla kaasamine; söödikud võivad mõj seeni erinevalt

Graffenrieda emargi *Graffenrieda emarginata* mood AM ja DSE *Hymenoscyphus ericae* rühmaga, mida peavad ekslikult EcMks. Sealsamas olema

Nyctaginaceae: *Neea* ja *Guapira* -arbuskuleid pole, hiiüfe v hõredalt

biogeo arvest elusorg ja tektoonika koevol. Riffide ja meremägede elustiku uurimine on eriti oluline, sest need on vastupidavad, samas kui soontaimed ja kõrgemad loomad  
Lasuarina (2), Pisonia (3); Tiliaceae (6 perek)???, Intsia, Rhamnaceae???, Scaveola (2; Goodeniaceae)

Friesi intersteriilsusgruppidele. Eristusid ka ITSga, parim rabA geen

AM kolonisatsioon teeheel kõrgem suure taimede BD korral ja looduslikul maa taastumisel vs külvamisel. Inikul metsamullaga ei suurendanud ke  
põllumaa rekultveerimine: külvati 4 vs 15 taimeliiki: mikroobide BD idiosüinkr põllumaa rekultveerimine: külvati 4 vs 15 taimeliiki: mikroobide BI

Laccaria bicolor + Pseudomonas fl. Laccaria inokul stimuleerib ebatsuga  
20\*20 plaat  
arvukus, laguprod O vs B horis

lepp vs haab: haaval suurem liikide arv ja ühtlus; liikide arv .

Fakultatiiselt AM taimedel on laiem levila ja ökoniss kui NM ja oblig AM taimedel;

Reostusprobleem

N2 fikseerijad puidus: palju, eriti lehtpuus ja keskmistes lagunemises

inthus, Amherstia, Leonardoza, Paramacrolobium

Arv lehe-endofüütide mitmekesisus tagab patogeenide vastu tõhusama kaitse juure-endofüütidel BD väheneb põhjast lõunasse (CAN-USA, N-Mex). Ent muld oli põhjas org-rikkam ja kleepus rohkem juurtele külge; juured p

ena j 4) Kõlõma j Kaug-Idas; 5) Beringi väin 6) McKenzie j; 7) Gröönimaa-Kanada arktika vah ala. Samas NW-Am on paik kus on mitmelt poolt tulnud populatsioonide s

oliselt tekkinud 3 korda evol. jooksul. Hibet väidab, et pea kõik pr-mä seemned on dipolaarsed ??? Vaidab, et on väga oluline seos okaspuu mädandamisega-täielik möla.

formaalseks kirjeldamiseks

opoliit v. A. Euroopas, 7 eriklaadi, Ameerika ja Vana Maaailma rühmad on teistest eraldi monofüleetilised. Tekke kohta erihüpoteesid LSU ja mt DNA põhjal en homotallism, sageli tek 2-4 tuumset eoset, mis on aeglasema kasvuga; eoste ristumine palju harvem kui võiks homotalse liigi puhul eeldada; arv lisaks muud mehanism kute patogeen

taimede liigirikkus seletab 8% AM seente liigirikkusest maapealsete osade järgi ja 23% liigirikkusest maa-aluse liigirikkuse j

; Casuarinaceae, Proteaceae-le. Taksonite ränne järeldajate kliimamuutuste järgselt. Tasmaanias oligots-s v niiske ja jahe kliima, mis sobis eri Nothof alamperek-dele ookeanides oli gradiendi tugevus üsna erinev. metaanalüüs. väga asjalik SUPPLEMENT

nevad soolad puhvritena erinevad, sõltuvalt lahustavusest ja transp ef-st. Redoksreakts mullas

teeldib Rhizoctonia

Petri dish

15N sisalduse erinevus

CM, Ramaria, Clavulina saprotroofid 14C põhjal. Sowerbyella puhul pseudoreps

iiigiti;

AM seene kohalolek stimuleerib rohukõrte lagunemist ja orgaanilise N kättesaamist. Seen kasvas eelistatult rohulaiku vrd teise taimega. Seen on v. ei suuda orgN omastada;

mükoriisa mõju on eriti tugev siis kui N/P suhe on kõrge (P limiteerib), sõltuvalt taime funktsionaalsest rühmast, mittesteriils

enide puhul; taimedel mükoriisastumisel on tugev päritav komponent

Juniperus, Cupressus, Platycladus lehtedes AZ vs NC -erinevused nii alati kui liigiti. >98% ITSi olid parimad liikide klastrid. Domin DothideoM j seenehüüfide endobakterid endofüütidel: mitmekesine sel

mood suurema osa.

vast; N väetamine ei mõju maa alla investeringutele 2 näd jooksul, ent 1 a hiljem vähenes 60% võrra boreaalse metsakõrgusgradient põhjustab N, pH jms gradienti läbi v

le EcM taimi, kuigi sealsed tsesalpiinilised mood monodomin kooslusi. Arv et ka tsesalp Daniellia on EcM s sapro

tsal kohal antagonismi uurides ilisemad on agressiivsem.

s.

s. lekse, mis levinud nii S-Am, AUS, TAS, NZL, PNG Nothof metsades. Descolea on arv AUS-st levinud Indiasse ja Ida-Aasiasse ophorus, Humidicutis, Neohygrocybe, Bertrandia on arv saproobid, kuigi on samuti EcM metsades

Tugeval keskk gradiendil AMF on fülogeneet klasterdunud väikeses skaalas.. Ruum ja fülogeneet lähedus mõjut enim kooslu.

evol-ökol bakteritel: kooslused fülogeneet enamasti sarnasemad kui

taimede ja bakterite liigi-pindala kõver soolasoos on erinev samas 3 produktiivsus gradient mesokosmos. Eriühmadel U- ja koeksisteerimine mikroobidel vs makroobidel: Negatiiv bakterite üld-BD: 10e10 liiki, 4-6 x 10e30 rakku. Tähtis heterogeen

xxx-web

d Geastrum + Radiigera liigid???

lalassezia, Cryptococcus; antibiootikumid ja haigused põhj tugevaid nihkeid

a olid erinevused eriti suured

: v suguk tase

ruumiline asetus Spartinaga seotud Nitrosomonadales (ar

004 lükkas ümber]. ECM-harud paiknevad koos, v a Hysterangium, mis on toetuseta. Phallales on Gomphalese sõsarselts.

vs avamaa

imaal: 18 rDNA kloonide RFLP+sekv vs kultuurid (rohumaadel sama, kultuuridel palju väiksem BD, RFLP bändid sisald mitmeid seeneliike)

2. v aktiivn FS suvel; 3. "mükoriisa abi"

. Eri klasterdamisalgoritmid ja eri cutoff väärtused annavad erineva klastrogrammi

linidid, millel oma niss. Kritiseerivad indiviidide/rakkude mitteamist mikrobioloogias

s

M, mood artrokoniide

keroc subtomentosuse saproobsed vormid on Bjerkandera adusta ja Mikola Laccaria sporuleeris). Chalciaporus piperatus ja Coltricia perennis ensüü

erinev efekt taimede idanemisele; Mitme liigiga inokuleerimine andis üldiselt keskmisi tulemusi v sama häid kui parima liigiga inokuleerides (idar

mmerell BA, Taylor PWJ, Terhem RB, Udayanga D, Vaghefi N, Walther G, Wilk M, Wrzosek M, Xu JC, Yan J, Zhou N. 2014. One stop shop: backbones trees for impo

7 taimed assots 47-60 seeneliigiga  
selt heterotroofsus; Chimaphila käitub nagu autotroof

eri seentega Serendipita, Cerat, Tulasn1 ja Tulasn2 rühmadest: Epu11 - kõikjal v.a. stepis; Epu12 - stepis ja kuivades kohtades; Cerat - niisketes kohtades ja Ceratobasidium domin - kõik väga vormirikkad; orhideedel erinev seene-spetsiifilisuse tase ja keskkonna-eelistuse tase väetatud pinnasel. Järgnes viljakohade massiline teke ja hiljem EcM vähenemine

mükohet Afrothismia (E mükohet Afrothismia (Burmanniaceae) juurtes on 2 seent: AM-seen ja endofüüt, mis ei tekita mingeid spets str ega taime vastureaktsioone

Tuber albidum ja Tuber aestivum

maal kevadel kogutud varudest

Pineerliikide (Inocybe, Laccaria) seente sagedust ei mõjutanud N ega peremees (pohl vs mustikas), kuid mõ

geldub evol labiilsus ja lai ring

mikrokosmosed, poollood tingimused, mensur k

T. Robustum indutseerib sama

N fikseerimise geenid ja geeniekspressioon Suillus variegatus ektc endobakterite BD j aliigiline koosseis männi + Suillus variegatus v

Arv Rhiz eosed on kuumutami

de eellaste jäänused; Höredate metsade teke koos tsesalp-dega al kesk-eotseenist. Savannide teke al 16 MAT, kuigi kõrrelised arenesid juba vara-paleots 64 MAT

ringiga (N-Am, E-aasia) ja kitsaga (Pinus strobus)

aga nad jagavad ka mükoriisaseeni

rasad kooslused, v.a. D. Maculata. Seente arvul populats kohta ja haruldusele pole seost. Mitme liigi seemned idanesid ka aladel kus vanu taimi pole olnud vaid 1 liigiga. Kesk-Eur piires ei esinenud regionaalseid erinevusi seente kooslustes liigi piires. Arv et laiem seenering suurendab fitnessi väga. M seened v sporaadiliselt: Network oli nested; arv et orhideede levikumuster ei peegelda seente levikut, kuna on nestedness; fülogeneet ja ökol dist

mikrokosmoste head ja vead uurimaks nematood

arv et AM-süsteemis C-liikumine taimest taime üldiselt ei toimi. Pettus võib olla, et osad taimed panustavad üh süsteemi vähem, anastomoseeruvad

risomorfide noodide poolest. Fülogeneetilisel 2 v 3 klaadi, mis arv alamliigid

mis kestaga Tomentellad on põuda taluvad

e DNA heterog: IGS2>IGS1>ITS. Kogu maailma populatsioonides geograafiline ja pikem ökoloogiline koondumine klaadidesse. Praimerid. IGSid ja ITS eri alleelidena di us asustab hoopis mageveekogusid

1 vs 2 vs 3 AM-seent. Mitme seene puhul mõju biomassile aritm. Keskmine eri liikidemõjule Jaaval: väga erinevate taimede AM kirjeldused



Eotseeni troop per ajal  
kombinant, mis avaldub ITS1 ja ITS2 sarnasuses ühele v teisele liigile. Vist tuleks kaasata rohkem geene et seda väita. Mõnedel liikidel lai pereme

a kauem proov on CTAB/merkaptotoetanoolis, seda rohkem tuleb inhibiitoreid. PCR sidumistemperatuuriga mängimine  
eringi kitsuse. Tuber pärit Lauraasia EUR või Euraasia osast.

etroop võõtmed omav ei erine.

AM seened stimul nodulatsiooni lepal

it, RFLP

e eri liikidele riisil

vs bakterid vs patigeenid: ülevaade; PILDID

vs AM-seened

ülevaade rollist ökosüsteemides  
roteeriva poti meetod välikatsetes AM ärahoidmiseks  
14C kiire liikumine taimelehtedest seenehyffidesse

bakterite liigirikkus bakterite liigirikkus DGGE bändide põhjal kõrg

AM liigirikkus suurem Plantagol mikrokosmoses, kus 3a polnud taimi kasvanud > Carex flacca > AM liigirikkus suurem Plantagol mikrokosmoses

parasiit

parasiidid vs sümbiondid

kohalikust mullast pärit AM-seened on efektiivsemad, sest on adapteerunud kohalikele vaestele oludele. Toimib N ja P puhul

nirK ja nirS geenide globaalne fülogeog: reageerivad keskk

omastavad, lagundavad ja ise sisaldavad org-happeid. Mõõtmisel raske vahet teha. Muld heterogeenne

2 spp. Nii ekto kui AM seened suurendasid taime kasvu, P sisaldust (ECM rohkem), P omastamine kiirenes, ECM seentel rohkem EMH (tugev kc

Wilcoxina koloniseeritu ECM ja AM sümbioos kui parasitismi-mutualismi kontiinum: sõltuvus genotüüpidest, keskkonnast, konkurentsist, ajafaktorist, arv MR moodust

imata seeneliikide erinevustest; vähene hulk seeneliike pärast raiet või põlengutel kompens ensüümide poolest suurem alligirikkuse metsas

Phialocephala arvukus kasvab peale põlengut

ots JPN Bletilla striata-ga ja stimul orhidee kasvu agaril. Kolonis juurekarvu, ent ei mood pelotone

5cm tuub

akts domin liigirikkas keskkonnas kus tüved on geneet sarnased ja ressurs on lihtne, ent Pseudomonas bakterite tüvede rikkus ja geneet erinevused  
upidavam. Toodi välja ka ühe genotüübi individuaalne efekt antagonistina.

did ja Hymenogaster pms, vähem Tuber ja mitte-ECM seened. Pelotonidest otse vaid Tomentella ja Hymenogaster. Albiinod saavad rohkem C seenelt kui rohelised taimed  
Hymenogaster pms, vähem Tuber ja mitte-ECM seened. Pelotonidest otse vaid Tomentella ja Hymenogaster. Albiinod saavad rohkem C seenelt kui rohelised taimed. Arv

EmH: domin. Kottseened, juurtes suht rohkem kandseeni (mulle tundub, et saproobid). Väidet eri kooslused mullas ja juurtel, kuigi suurem osa klaadidest kattusid (ei testi

Cephalozia varians: kottseened: Helotiales, Chaetothyriales, Onygenales,  
RAPD DSE kultuuridele: Phialocephala sama genet mitmetel eri peremeestel kuid mitte läbi 2 aasta

it primerid EF3/4 ja nuSSU 0817/1536 andsid erinevaid tulemusi. Väga palju oli kimäärseid molekule (eri praimeritel 31-40%). Arv et nn. Schadti ja vandenkoornhuyse ba  
bakteritel globaalselt: mida poolusepoole on levila keskos  
N2 fikseerimine suurem org-mullas kui min-mullas. Eriti suur mulla

mass vähenes 70%; ensüümid aktiivsed sügisel ja kevadel, eri ensüümidel tippakt eriaegadel; PLFA EcM seene biomarker vähenes 2 kuud pärast

id PCR replikaate ja vähe tsikleid ning PCR produktid hiljem kokku segada

niseerida võivatega samas OTUs

sarnasust, ylesreguleeritud tsütokroom 450 geen, superoksiidi dismutaas, väga vähe olulisi muutusi puhaskultuuris vs 48h infektsioonistaadiumis seene vahel

ceae liikidega

NUDA, Lyophyllum shimeji, Paxillus sp, Pisol, Scleroderma 2spp mood EcM Picea glehnii-ga. Boletus pulverulentus, Geastrum mirabile, Suillus l  
erinevad seeneliigi

sammalidel - väga palju eri eluviisiga seeni, sh samblaparasiidid, EcM seened, okka-endofüüdid; domin Helotiales

: populatsiooni struktuur: ühtsed popid, pole heterote defitsiiti; raske eristada eri populatsioone - arv jääaja rekoonis artefakt. Ühel tüvel 3-4 indiviidi, Estimate S järgi 1 lisa

etrapolaarne: regionaalne ristviljastumine, lokaalne lai diversiteet: ühel tüvel v palju isendeid. ISSR. Geenid: RFLP  
semel krossing-over toimub. Fülogeneesis ITS1 ja ITS2 inkongruentsed  
roliikide hiljutine kokkuvimine on soodust hübriidide teket. Arv. et hübridis on v tavaline ja oluline evol-mehanism seentel

hi

atada ekstrapol headuse hinnanguks, M-M võrrand on param. Viletsad tulemused

NOR: viljumise aeg mõjut

Lehtede bakterid on fülogeneet konserveerunud; Taimede taksonoomia seletab 26% Bak Lehtede bakterid on fülogeneet konserveerunud; Taimede bakterid: erinevate BD arvatavate progede võrdlus: eri tulemused C

oluliselt kontroll-ja kergelt väetatud rohumaadel; üksikudel liikidel stat oluline erinevus rohuma tüübist mullabakterid erinevad oluliselt kontroll-ja kergelt väetatud rohuma

kaheks jagatud inhibeeritud teiste EcM se

Cenoc-assotsieeritud kultiveeritud seentel: paljudel seentel esineb peremeespuu-eelistus, ent spetsiifilisust mitte. Kask erineb okaspuudest suht ro mükoriisaga kaaslevad vt eespoolt

imine taimerakus; Monotropia -er paks mantel, rakusis kolonis; Rhododendron, Gau Pyrola rotundifolia arbutoidse mykoriisa kirjeldus: kandseen, paks mantel, tugev rakus Biolog(R)domin: Pseudomonas, Variovarax (eriti Tomentellal), acti poolkõrbes 2 kõrreisel juurtes v sarn (domin Pleosporales, Agaricales). Kõrreistel kooslus omavah sarnasem kui Yuccal

nii taim kui seen reguleerivad ainete transporti vastavalt sellele, kui palju vastu saavad

Flavonoidid Moriin ja Hesperid

ia jäävad eemale askogeensete hüüfide ultrastr põhjal ldati Pezizalesest

hmas pole kindel.

eukalüpti invasioon arv tänu mürgisele varisele ja allelokemikaalidele. Eukalüpti invasioon arv tänu mürgisele varisele ja allelokemikaalide

SSCP AM-seentele Subarkt soos: peremeespets pole Andromeda, Empetrum ja Vacc uliginos

liiga konservatiivne AM olemasolu seletab 18%-57% taimede BDst v liigirikkusest

spets:taimeosa eraldi

se, ohtruse. Dominante suurendab ühtmoodi nii harulduste kui tavataimede ja invas .

troopika seemne-seened: vahet pole 4 puuliigil; domin cf Botryosphaera ja cf Clonostachys

proovi koosluse struktuuri ja olemasolevate andmete põhjal

roofid TNT bioremediasioonis efektiivsed

fraga oppositifolia on EcM N-Am, Pedicularis EcM arktikas. Silene acaulisel DSE paks kol. Erandlikke pole illustreeritud!

Neocudoniella radicea kuusejuurtel. Liigikirjeldus ja EcM-moodi struktuuri kirjeldus [tundub, et siiski pole ektoga tegemist, sest mantel väga lai, atriline, polüploidiseerumine, genoomi introgressioon, hübriidiseerumine. Kodustamise, substraadi, peremehe spets mõjud. Näidetena Heterobasidion, Melampsora hübriid

ioneerimine pehmemad <valgemad>pruunmad. Arv. Erinevused tulenevad vanä seemne efektiivsemast oksalaadi tsirkulatsioonist. Lagundatava puidu d13C ei muutunud 50

hüpoteesid, miks AM kolonisatsioon väheneb taimede tiheduses

seentel arv fakultatiivne. Ei tohiks ranget vahet teha EcM seentel ja saproobidel, vaid EcM seeni tuleks käsitleda ki biotroofi-saprootroofi kontiinumi

saprootroofide tegevust

ei arvest saproobide olemasolu F-horisondis!!!

optimaalne pesemistemperatuur 3,5-5,5\* madalam, ka v sam probedel eri Tm; vs DGGE, membraanhübriid -sama tulemus

liid

; AM seente liigirikkus sõltub taimede liigirikkusest, mulla niiskusest ja liblikõieliste olemasolust; koosluse struktuuri määravad suuremat sümmeetriat ja haigestumist puuliikidel, millelt seened isoleeriti. ITS pea identne. Peremehe-spets tüved tekitasid palju madalama

MHBde PLFA koosseis sõltus samuti kloonide kasvukiirusest ja tihedusest

kuuseokka kõdus: BD kasvab lagunemise käigus; Lophodermium arvukas algul ja ka hiljem ning aktiivne RNA vs DNA põhjal; lagukiirus eri kiirused

ei ole Endogone!!! tähtis roll liivaluidetel liiva sidumisel.

hübriidhaaval vs N väetamine vähendab AM kolonis, suurendab ECM kolonis

!; Aneura pinguis: Tulasnellales. Jungermannoidne mikoriisa

Petri tass + seen süsinikpaberil

maalselt, ent täpsed järjed Ecuadoris: Maksasamblad ja orhideed: Tulasnellales sekve Ecuadoris: Maksasamblad ja orhideed: Tulasnellales sekvensitüübid kattuvad minimaalselt

Suillus grevillei süntees õnnestub kuusel söepaberil

in Ecuadori Loja mägimetsade orhideedel. Nii mullal kui epifüütidel. Toetavad elektronmikroskoopilised vaated

% -99,8%

Mattiolomyces terfezioides: kolonis juuri, kus mood sõlmekesi, ümber juure mood sklerootsiume -just nagu Morchella. Peremeestaimi palju

üldiselt väidetakse. Terfezia ja Robinia vahel pole samuti mingi EcM. Helianthemumi ja Robinia korteksirakud lagundati, eriti kõrgete P konts juures, hülfiid tungisid steeli ja end

naria juureseed, palju erinevusi vrd kultuuridega; nested PCR ja seemed -liigirikkus suurem komposti inokul vs kontr

DGGE bändid: bakterid ja seemed -liigirikkus suurem komposti inok

akusis kolonis

uusl jaotunud - arv geogr mustrite tõttu (ei diskuteeri koevol vähest tähtsust)

remehe-spets. Arv et nishide jagamise tõttu pole regionaalses faunas sõsarliigid esindatud!

kaheks jaotatud juuresüsteem

tsioone. Märksa võimsama testi saab kui arvestada eri geeli efekti blokina. Bonferroni probleem paariv vrd

hambasodist leiti väga palju eribaktereid 16S rDNA sekveneerimise

CWD-I ECM moodustamine

SSU, ITS, LSU referentsid

praimerid: degeneratiivsed, katavad terve ITSi ja 800-900 bp LSUd; nested kõigile AM rühmadele

sekvensi proovi kohta oli piisav erinevuste tuvastamiseks; Kvantitatiivsed meetodid töötasid paremini kui kvalitatiivsed (0-1); Kvalit meetodid tö

ist (Rhizoctonia -Tulasnella, ceratobasidium)

ITS varieeruvus: ITS1 varieeruvam kui ITS2; AG-sisene var 0-3%; AG1 jaguneb 3 peremehe-spets alarühmaks, kus rühma sees ITS >99% sarn; AG4 jaguneb 2 peremehe

arvukus suurem risosfääris vs bulk soil; mullatüüp, stress, puu vanus ei lugenud fikatsioon

üldine bakterite isolaatide ja aktinomütseteide arvukus suurem Pinu

arv et Oidiodendron on tamme endofüütne sümbiont

arv et ECM seente dikariootse

merebakterite BD tipp temperaatses N ja S vöötmes talvit

Sulawesi jt Sunda saarteni. Melaleuca parafüleetiline. Levinud Austraalias ja Uus-Kaledoonial (sh perek Callistemon);

atus -Peziza vacinii

DSE biotsiididele palju resistentsem kui ECM seened

a lepp; Mõned männiliigid mood pigem ekstendMR, teised pigem ektoMR v ohukese mantliga; v tugev pos mõju taimekasvule eriti ECM mood puudele vrd EeMR puude, võis viljuda väh 2 meetri kaugusel elusjuurtest; eoste idandamine noore taime juurtega ei õnnestunud; tüved aja jooksul kaotavad EcM mo Paxillus involutus: tüüpiline ru

undamine ei mõju mullaseente kooslusesle. Mineraalmulla BD suurem kui org.

kitinaas-transform Picea risosf: liigirikkus ja koosluse str sama; mõjutab mullahorizont ja aeg

eostega inokul palju ef-sem ku  
eostega inokul palju ef-sem ku  
vastupidavus temperatuurile: e

mükofagne kukkurrott sööb pr

Atlantilises BRA vihmametsas domin AM mürdilised; ainsaks uuritud EcM taimeks Cocoloba rosea. Cocoloba on BRA sh Atl vihmametsades l

svad aeglasemalt kui mitteECM peeneimad juured; Seeneosas rohkem N, P, ent kuni 60% kiitini ja seetõttu lagun aegl. ; arv sõltub suksessiooniga, sest ECM taimed on v

ndite suurem arv ei suurendanud liigirikkuse soodsat mõju

taimeparasiidid

vs ECM eukalüptidel. Suksessioon

ericales: MR tüübid: eriliikidel leitud mitmeid eritüpe, sh Pyrola -nii arbutoidne ki eri

isel pinnal saab u 33% Tulasnella kaudu

arya ja Quercus radiats-ts Eur ja Am; Crataegus S-Hiinast. Eur-st on puudu külmaõrnemad subtroop perek, suurematel perek suurem tõen säilida. Paleogeenis sama kõikja

tel

hheniseerunud bulbilide ja sklerootsiumide olemasolu on aluseks edasi lihhenis seente tekkeks

i metsa mullastik erinev

duses, ensüümid, konkurents, katsed, ülevaade

20\*20, ettekasvatatud ja inokuleeritud Petri tassi

aade kõigist aspektidest

ErM seened jm kottseened lagundavad kiitini palju paremini kui ECM seened Paxillus

eetakse saproobiks

i ja Jaccardi ei saa kasutada koos eucl distantisiga

l uurimaks, kuidas keskkond ja tunnused on müju avaldanud fülogeneesi käigus sõlmedele

Glomeraceae vs Gigasporaceae domin sõltub mullalõimimisest. AM koosluse struktuuri erinevus korrel geogr distantisiga >järelikult on levimine limi AM kooslus on vastupidav tugeval häiringule; kooslust mõj NM Dianthus ja Carex

is kliima jahenemine ja mäetekke protsessid

2ks jaotatud juuresüsteem odral ja vahtral, 3 AM seent; kontrollpool vs AM-pool. 14C söötmine. 2ks jaotatud juuresüsteem odral ja vahtral, 3 AM

ali alles 5 MM juures ja see et efekt oleks max, MM peavad olema hajutatud, mitte grupis koos ega otstes

os mõju väiksem

DNA võib sattuda bakteritesse, ent seda ei peeta maj eriti ohtlikuks. Kuni 10% mulla P-st võib olla seotud DNA; Organismid võtavad rakkudesse

Hiinas Pedicularis liigid 90% AM

Rhizopogon + ebatsuuga -N2 fikseeriv Bacillus eriti tuberkuloitse lasküpsust 3 p jooksul; öösel max, päeval min; vsid 2% eostest levib >5 m eemale. Vihm ja niiskus soodust eoste eraldumist; tuul soodustas levimist kolonisats vastupidine / kolonisats vastupidine DS kolonis-le. Varieerub rohkem. Korrel. Pos temp, sademete, niiskuse, pHga, neg päikesepaistega, N, P, org-aine konts-gis+Ostrya)))

; Orchideae autotr ja seotud CeratoB, Tulasnella ning Leptodontidium (v.a. Gennaria diphylla, mis mõl regioonis seotud Cenoc, Lact, Russ vs Pezi ybe geophylla ja Hebeloma velutipesiga

sammaldaimede kud sammaldaimede kudedes Lätis arbuskuleid (maksasamblad Conocephalum, Fossombronia), kott- ja kandseente hüüfe mitmet

Aneuria ja Cryptothallus kandseentest endofüüdid: koloniseerivad vaid parenhüümi gametofüüdid, sarnased struktuurid orhidoidse mikoriisaga

3. Seemned ei idanenud hasti ei huumuskihi all metsas ega eri laborisootmetel koos voi ilma seenega. Vaid MRA& suutis idandada moned s Pyrola rotundifolia, P secunda:

illas ei mõjuta seente BD DGGE jr

mikrolüljalgsete E läbip, d=17cm, h=30 cm

tikute patogeen ja suurendab vastuvõtlikkust Pythiumile

läbimist, peale predatoorite poolt söömist vitaalsus väheneb tublisti; EcM mood võime säilib peale seedeikulga läbimist

Tom sublilacina: eosed levivad

dele;

ndmestikke

piklik, puuta

värskes kodus Helotiales, Mycena-Marasmius, Cantharellales, samblakõdust ja allpool Capronia, Thelephorales, Helotiales, Umbelopsis (endof Zygomycota), Archaeorhi pholoma fasciculare; inokulumi efekt

peenike tubes, perliit

: liikumine ja aineringe: ülevaade, diskuss

avad teatud määral orgaanilist ainet, ent N ja P kättesaamise eesmärgil. Neid ei saa saproobideks pidada.

387

ling, SWE: EcM seened asenduvad Helotialestega, samas bakterite hõimk tasemel rühmad samad

Sarcodon, Suillus; 2 isovormi Amanita, Tricholoma, Piloderma

aga. Arv liigirikkus sõltub kliima stabiilsusest läbi aja. Refuugiumid (ekv põhjapool) vs levikutsentrid (ekv lõunas), VIITED

estsent palju tundlikum kui agaros-geelelektrofoores

una on korrelatiivne

Frankia: kehel dominant-genotüübil esineb peremehe-elli

Invasiivsed mittepatogeensed mmikroobid: ülevaade (seer



Woollia pungens erikoidse mükoriisa seened RAPD

esulahuses mõjub õigetele paremini kui valepaarsunud probedele, ent madalama konts juures madalam tildsignaal. normaliseerimine ühe universaalprobe jr. Esinesid mõne

vs ECM , pappel, paju, kk-tingimused, taime vanus, juure osad

paju ja Populus deltoides: Looduses EcM domin mõõduka niiskuse juures, AM domin kuivemates ja niiskemates, ent väldib l

aelis-Menten vähem ebastabiilsed, hinnang väikese nihkega (üle hinnang kuni 6%). Soovit kas mitmeid paralleel ja usaldada neid, mis toodavad platoo poollog skaalas. Ha

purascens. Sh Entoloma sp oli kasulikum kasvule. Paiguti mood EcM ka Leccinum scabrum. Suillus, Rhizopogon, Ripartites ja Cenoc ei nakatanud

AM diversiteet suurem seal kus suurem taimede primaarprod, ent kooslus v erinev. AM koosluse ühtlus suurendas P summaarset ülevõttu . AM k

ja G-C erinevuste kaotamiseks; vale neg pole, vale-pos 4%; 96% õige; min [DNA]=50ng; 1 valepaardumisega probedel u 8 \*C madalam dissots-temp; ent ka õigetel võib analüüsi ja UPGMA dendrogramme. Põhim sobib ka koosluste biogeo uuringuteks

bakterite levik mõjutab enim soolsus. Mullas on BD v kõrge, ent fü

Colletotrichum lehe endofüüdid Guyanas: peremehe-eelistust pole

solithus, Scleroderma ja Tricholoma EcM süntees Eucalyptus globulusega. Russula spp ei mood EcM. Kõrgus polnud hea näitaja, mass oli . EcM kolonis ei korrel massiga

Arabidopsise juurtes bakterid on fülogen erinevad vrd mu

eened polüfüleet-parafüleet.

eente algne vorm väga suure töenäosusega

nütseeli maa seest maapinnale tulekuga, läbikuivamine ja vetikast põhj oksidatiivne stress. PILDID

eri taimedel (paraku eri kasvukohtadest) eri endofüütide kooslused. Mõnedel ka samast kasvukohast eri kooslused Fusariume

osaceae (v-a Dryadeae), Cupressaceae; Casuarina

bakterid ja arhed Pr Guajaana setetes: pms proteobakterid, Flexibal  
bakterid 1300 m sügavusel meres, põhjast 60 m ülalpool samaneva

AM seente koosluse str väikseses skaalas on 'overdispersed' - eri suguk liigid kipuvad koos esinema; juurte kolonis osas on A  
Kooslus on stabiilsem ja peremeestaime biomass suurem kui AM kooslus. koosneb rohkem kui ühe sugukonna liikmetest; Gl

bakterite diversiteet xxx + tuhk

pott: 2 inokul taime vahel üks mittemükoriisne

at jama

erobasidionil ja Amanital, puudusid Suillusel ja Paxillusel

EcM juurtel 4 korda enam baktereid ja aktinomiitseid kui NM eukalüpti juurtel

õivad taimed käituda parasitidna seentel, kontrollides neid ja vastutasuks lubades elada. Kõik EcM-evol etapid on looduses nähtavad pealiskauds  
mükoriisid taimed kogu maailmas: ülevalde

roll looduses, funktsioonid: toitained orgaanikast, kaitse stressi ja patogeenide-parasiitide eest

RT-PCR bakteritele, mille fenoolne substraat oli rikastatud 13C-ga;

te divergents oli 37 MAT ja levik toimus arv üle N-Atlandi silla; Quercus sect Quercus tek arv W-Am-s ja levis 17 MAT Aasiasse. Quercus tek arv Aasias ja levis üle N-

s: 20 p vs 90p, risosf vs eemal: DGGE 18S rRNA 1650 bp. Algul risosf domin pleosporales, mitterisosf Eurotiales, Mortierellaceae, hiljem risosf Cryptococcus jt Filobasid  
omnivora on Rhizinaceae-sse kuulub patogeen; Phymatrotichum on saproobne anamorf Pyronemataceae sgk.

naosas v tugev migratsioon. Refuugiumid N-Chiloe ja 43°S põhjapool. Areeal ei puutu kokku Alnuse ja tammega, mis on vast NW Argentiinas ja Ekuadoris. Alates 34°S

M seened

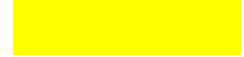

o Eur salamandreid, pärit ilmselt Aasiast.

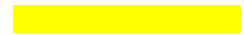

eraldatud reostusalalt vs norm (metallid inhibeerivad rohkem)

orsicum tsistuse põlenud S-plotte

ntega Wulschlaegelia Mycena ja ympopuse liikidega, Gastrodia similis Resiniciumi liigiga

llaceae, Serendipitaceae, CeratoBasidiaceae: seentekooslus ja orhideede fülogeneetiline str olid seotud vaid epifüütsetel orhideede. Arv. Suuremate

eostega inokul koos seemne ja

The!: idandamine ei õnnestunu

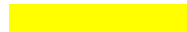

pott  
pott  
pott

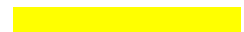

olial; ülejäänutel üksikutel juuretippudel ja Amphinemat meenutaval morfotüübil

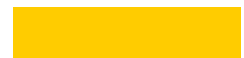

kuleeriti seen ja liiga palju oli toitaineid

## ivergeerunud

accaria, Hydnangium; 9) Lyophyllum p.p.; 10) Entoloma s. Str.; 11) Tricholoma; 12) Catathelasma. Vastupidisi muutusi pole. EcM harud eriti radieerunud

gid läbiseigi. RPB1>RPB2>LSU

ialis ja transp funktsioone

noomia probleemid Eur nimedega, Paljud seened eri biogeo muustriga: Kosmop, Gondwana, Pantroop, AuS-MAL, Patsif, AUS-Holarktika. Esineb AUS regionaalseid ende

. 10% seenendeeme on vrd teiste taksonitega v väike

mas EcM plottides jäi lehtedesse rohkesti fosforit vrd sapro-plottidega, ent vähem Ca. Kõdukihi paksus Dicymbe metsas palju suurem kui mujal ja seda kolonis tihedasti E

Mitu uut kandid-divisjoni

bakterid 16S rDNA majandatud vs majandamata rohumaal: majand  
B: DGGE; looduslik vs polllooduslik vs kultuurrohumaal (suurem dt

riti Liparis liliifolia. On oluline teada, mis faktorid mõj seenete arvukust; Enamik Tulasnellasid eelistasid puutumata metsa ja tetud vanuses puitu;

la spp; Liparis: Tulasnella 1sp; Goodyera pubescens: Tulasnella 1 sp (ROHelised). Mõnel taimeindiviidil vaid üks seen, teisel mitu

ida mullas väga vähe ja juuretippudelgi vaid orhideede läheduses. Tomentellade arvukus oli sama paikades, kus orhideed vähe vs palju; Arv et Orh  
Looduses geneti piires rametitel, juurtel ja pelotonidel alati sama sümbiont; laboris on võimalik ka mitme liigi pelotonid korraga. Kiireim kolonise

Glomus spp, mis mood viljakehi ja AM AUSs

aceae), Lasiopetlum (Sterculiaceae). ECM DEF v lõdva

itli Melaleuca uncinatal. Võib mood viljakehi potikultuuris

uusk. BromodUTP-ga rikastatud N-substraatide ülesvõtt on filogeneetilisel määratud. Kooslused eri kõdus erinevad - kuusekõdus fülogen üledisp

i monodomin metsas; EcM kol MD 100% vs 14% segametsas. Arv MD metsas vähem herbivoore, sest Dicymbe seemneid ei eelistata ja mast fruiting. Kaugeim seemik 17

20\*20

vate liikide arv v väike

NZL Ericales mood ErM. Pernettya macrostigma (Eric) jagab identse kultuuriga sümbi

7cm sügavusel mullas

**Mycelium Radicis** Atrövirensi eraldus, kirjeldus, mitte-mükoriisne, pigem patogeen

amma sünt. Betula pendula (L. Scabrum ka haaval); Suillus, Xeroc badius, Boletus edulis, Amanita rubescens ei nakka kaske ega haaba  
EcM kaaslevad seened: põhiliselt MRA, vähem Penicillium, Mucor, Verticillium, Aureobasidium pullulans. Aur.b. Ja Vert endofüüdid; MRA, Per  
pH optimum Suillus ja Xeroc puhaskultuuridele ja M.R. silvestrisele u 5.0, M:r. Atrövirensile polnud vahet  
irgatum, Amanita rubescens ja Mycelium radicis silvestris alfa, beeta ja gamma mood EcM Pinus montanal

veg binoom, jackknife1, log, SV, Weibull. Power alati ülehindab. Ekstrapol parem suurema liigirikkuse juures, kuni 2 korda suurema andmemahu jaoks. Saab k alati mõõda

**DSE -ITS -juuretippudes**, lagujuurtes, kändudes, elusjuurtes, elustiivedes: erinevad, ent paiguti kattuvad Phialocephala liigid

it: 147 liiki ja hinnanguliselt u 500. Pakuvad sekventsipõhises taksonoomias nimedeks esmaleitud sekventsia accession numbriga

i filterpaberitega.

liigile. Afrothismia liigi mükohet Afrothismia liigid on kitsalt spetsialiseerunud ühele Glomus liigile. Afrothismia liigid on suurusjärgu nooremad kui  
id evol plastiidi genoomis või plastiidid puuduvad. MH taimede ja seente koevolutsoon

AM seentel kasvavad mükohet: mõned kitsa, mõned laia seente-ringiga; kasutavad fülogeneet erinevaid seeneklaade

Wooltsia pungens: puhaskultuuride baasil määrang: 1 dominantliik 90%; 1 dominantge  
ErM seened Wooltsia ja Leptospermum terves juurestikus (1 m eemal) juurest saadud liigid

bakterid-nematoodid.

DSE: kasv söötmetel väga suure pH amplituudiga; resistentsus kemikaalidele veidi suurem kui Suillus variegeatus ja Cenoc ja Wilcoxina

onda.

rus

eri tunnused mükoriisamoodustajatel (closed pore hilum  $X_2=23.5$   $P<0.001$ ; apical pore absent  $X_2=11.5$   $P=0.001$ ) ja saproobidel (open pore hilum.

Frankia: leppade kolonisatsioon ei sõltu eriti substraadi päritolust

Morchella sklerootsiime palju ka lagupuidu juures, kus liiguvad närilised. Pakuvad, et kahjustatud metsas sklerootsiumid võivad juurde tekkida, idaneda ja poolduda  
Sebacina vermifera-laadseid seeni on leitud rohttaimede juurtest

ntoloma rhodop, Lact helvus,rufus, Clitopilus (Pax) prunulus, Tricholoma albobrunneum, imbricatum, pessundatum, vaccinum, Rhizop luteolus, r

bakterite liigirikkus ja BD suurem kontroll vs Zn-reostusega alal

erivõimaluste kirjeldamine

onfluens mood haru. Lihhenis Multiclavula on Clavulina-Membrum sösartakson.

lut), Limacella (Aman), Camarophyllus; Pseudoclitocybe, Pseudoarmillariella (Cantharellula), Omphalina, Arrhenia (Omph), Phaeocollybia, Squamanita, Pleuroflammula

iiigid identsed ITS poolest

Gaultheria: mitmed

vrd Terflezia (Helianthemum)

network-anal: taimeliigid valiti n vastavalt ohtrusele; MEX taimedel taimede nastedness 2x suurem kui seentel; Öpiku kooslus

planktonis SSU põhjal palju uusi protistide harusid

dolipoori ja parentosoomi pole; Dacrymycetales, Tulasnellales -fragmobasiid vaheseinteta või väga nõrgalt arenenutena

seisvalt 2 korda. S.o. Arenenud Salicaceae-ga sümbioosist. Hymenogaster ja Hebeloma arv laia peremees-ringiga. ITS põhjal raske kõiki liike eristada, sest vahed väikesed

100 BD tõuseb

se) on tek korduvalt; LiP ühe korra Polyporales seltsis  
ooslusest võimaldab kogu koosluse kõveratõusu hästi hinnata.

ECM kaaslevad seened: Helotiales (3), Alternaria (2), Cladophial (1), Hemimycena (2)

..a. interaktsioonid. Kõikide ens akt kõrgem talvel 2-3-korda. Lakaas, kitinaas, glükosidaas akt suurenesid pärast harvendusraiet. Vilets seisus puude ens akt ühtlaselt mad

l, mida Euroopas pole. Iseloomulik Betula rotundifolia alustaimestik ja sellega seot peremehe-spets seened

Festuca paniculata juured

vs ECM Borneol. Mõl esinevad v eri metsatüüpides ja eri pinnasel. Ka mullas sügavuti levik sarnane.

ECM vs AM: Uapaca on pigem ECM kuival pinnal ja AM niiskel pinnal, topeltkolonis harvem kui võiks eeldada; Leptospermum on ECM kui läh  
ldina), . Kõrg-Banas paiguti Neea ja Guapira domin 5-10 m põõsastena. Kõikjal Cocoloba väga vähearvukas. Samad liigid v vähearvukalt ka terra firma metsas

is ja BD suurem, inokpot parem kui kontr-taimedel -arv et suurenenud EcM kol suurendab puude taluvust parasiidile, rohkem min-aineid parasiidile: ECM kooslus parasit  
gaseened ja sinetused+üraskid: ülevaade kõigist aspektidest

nt s.o. Arvutuslikult aeglane

hja diploidsust, pole aseks leviseid jms.

matsutake: vaja isobutüraati v

xillus vs Tricholomopsis agaril; Hebeloma vs T. sümbioosis  
India taimedel India taimedel

tuub

lõikheinalistel esinemine lõikheinalistel -metaanalüüs: ei seostu niiskusega ega häiringutega, pos sõltuv [N], neg [P, K]. Olulised adaptatsioonid AM-ta toime tul

funktsionaalsete rühmade arvukus ja suurem liigiline koosseis suure

l: Vaikne ookean eri süg: eri praimerid annavad v erineva pildi; domin Saccharomycetales. Sügavuseti pole erinevust

skkinud ja taimed surid

ustasid võrgustiku vanemate taimedega: efektiivsus biomassi, N, P osas korrel v tugevasti, ent seda ei mõj üldse EcM kolonis. Taimekasv palju parem vrd mittemükoriisise

eri EcM seentel erinevad e

Chaetothyriales : Chatospira (Cladophialophora, Exophiala ja Capronia sugulased) isol taimejuurtest

Phialocephala fortinii ja Heteroconium suppr Verticilliumi kahjustusi juurtes, ent mitte söötmetel. Eri kultuurtaimedel domin juurtes Ph. Fortinii+

s suurem EcM juurteil kui NM juurteil; risosfääris kui bulk soilis, lepajuurteil kui ebatsuuga juurteil

bakterite kooslused: eri kompostitüüpides suured erinevused; virtsas Ascobolus ja Psathy kompostis seente ja bakterite kooslused: eri kompostitüüp

r kõrvaldamiseks). Üksikud katsed

biogeo bakteritel globaalselt: arv et laialt levinud bakteriC

praimerid AM-seentele SSUsse (spetsiifilised)

endofüütidid pilliroo juurtes, risoomides, vartes vs lehtedes: BD sama. Enamus liike kattub maapealsetes ja maa-alustes osades, ent paaril stat olulis

: levik transektide kaupa. Microberlinia, Tetraberlinia spp, Didelotia kasvasid koos, samas kui Anthonotha ja Uapaca olid eraldi. 6 a jooksul suured muutused mull P-s.

is. Paljude liikide P-eelistuskõverad ei kattu Korupis ja D-es. Arv üldiselt kõrge P tasemed ei soodusta EcM tsesalp domineerimist

kase ja tamme seemikutel pole

AM-seened veetaimedes Lobelia ja Littorella -madal BD eri järvedes: paar Glomuse ja üks Acaulospora klaad; Lobeelia ja littorella (mõl aerenhüt



Mikroobne ens aktiivsus palju suurem leppade kui mändide all

il suurem ühtlus, hiljem liigirikkus ja ühtlus kahanevad

s rikkal pinnasel

AM prod suurim kõrgete rohundite juures rikkal pinnasel ErM+ECM biomass suureneb lokaalsel toitainete gradiendil kui toiyu on vähem (mõõd

er D, Liu J-K, Maharachchikumbura S, Manamgoda D, Martinsson S, Neves MA, Niskanen T, Nylinder S, Pereira OL, Pinho DB, Porter TM, Queloz V, Riit T, Sánchez-C  
ja palju valeinfot, mida aga välja ei praagitud!!!

-63.

n eelnevalt lagundanud .

rrre nii Männil kui Ks. Calocybe gambosa ja Melanoleuca brevipes NM

yophyllum fumosum (arv fakult ja ka ektendo) ja Tricholoma 4 spp mood EcM; Lepista 2 spp, Calocybe ja Melanoleuca ei mood.) Lyophyllum ja

Red queen. Vanade aseks org pikk nimekiri: bdelloidid, AM-seened, Ophiostomataceae jt

Frankia: isoleerimine puhaskultuuri, eri lepalikidel eri kasvukohas

mood EcM Fragara cocoga. Eluviisi lähemalt ei kirjeldata

rasiooni

MHB jt juurtel x

vs benomüül (vähendab), kaptaan (sama)

lla kuuluvad ka perek. Cejpomyces, Uthatabasidium, Tofispora, Oncobasidium, Ypsilonidium, ; Waitea kuulub Corticiaceae alla.

attuvused N-Am ida-lääne ja Eur vs Aasia 2 ja 2 liiki. Tek u 125 MAT

ellade kui ka EcM seentega (er Sebacina) ja mykohet sotud EcM seentega, millest 90% Sebacina; ITS1OF ja ITS4OF ei tööta Tulasn puhul eriti  
, mujal palju eri Pezizales (sh Tuber, Hydnotrya, Helvella, Genea). Sh taimepop-d ei erinenud haplotüübiliselt  
seerimiseks puidust: liigispets probeid

3 biomass ja ergosterooli konts. Korrel kõvasti.

me produtseerida viljakehi ilma taimesümbiondita  
odutseerida viljakehi ilma taimesümbiondita  
heliaceae spp, Sebacina sp; eri liigid üsna spetsiifilised

a. Bayesi statistikaaitab veic olukorda lahendada  
it liiga jäigaks.

sum genoomika  
ntrollib mitokonder  
Robimia CO2 suurendab kolonisatsiooni, Rhizobium suurendab kolonisatsiooni

ergosteroolipõhine kolonis mustikal ja pohlal suurem kõrgema CO2 ja soojuse juures,  
vs ECM EMH ehitus, strateegia  
bakterite arvukus suureneb ja mitmekesisus erineb EMH juures vrd  
suurem kui on ECI pott

1 ja Afzelia seentele -oluline saidi ja häiringu efektid. Tetraberlinia omastab EcM paremini Amhersteae mullast, ent mitte mujalt ja see korrel kasvuga; Afzelia seemikud m

BD, % koloniseeritud, spets praimerid  
biogeo taksonitel (klaadidel) erinev: lokaalsed, regionaalsed ja globaalse levikuga liigid. AM BD suurim troopikas

endofüütide ja saproobide seosed. U 66% füllosfääri seentest on ka hiljem saproobid kõdul, väheneb ajas sõltuvalt kergesti omastatavate ühendite

nii ühe kui kahetuimalised läbiseegi  
Tolumnia variegata (4 klaadi Ceratobasidume). Ka idandamiskatsed näitasid, et Ionopsis idaneb ja kasvab vaid oma seentega, mitte Tolumnia seentega; vastupidine oli siis

noteese  
bakterite ja arhede BD hüpersaliinses (kuni 32%) vees. 16S T-RFL

anninile). Palju muid seeni, sh EcM seeni, mis enamasti mood lakaasi ja reag tanniinile

amisel. Nii Wilcoxina EeMR (marksa rohkem) kui nonMR on seotud N2 fikseerivate Bacillus polymyx Nii Wilcoxina EeMR (marksa rohkem) kui nonMR on seotud N2 fi

ami ja kriidi-tertsiaari plahvatust ja sõltus see rohkem mandrite lagunemisest; neandertaallased eristusid 500 000 a tagasi

sylvestris, Abies alba, Tilia, Fagus jt.

nii Tulasnella, Ceratobas kui ka Serendipitaga

opt temp 18-24kraadi

vad ka ebatsugaal ECM. Kas k C, pole teada

Erica, Epacrida

ldab hinnata ajaloolisi protsesse ning asjaolusid, mis mõj liigirikkust. Raske siduda ohtrust  
eamiseks PCoA vektoriks. Kuvavad korrelatsioone vaid läbi põhivektori

Glomus etunicatum on polüploidne seen, mille igas tuumas on mitu ITS varianti. Kongsertevolutsioon ei toimi hästi. Valikuline tuumade kandmine

itseel ja haploidne viljakeha

Rhizopogon, mis domineerib

sed eostega koloniseerijad: Suillus, Rhizopogon, Thelephora. Väikeste saarte dominandid Suillus ja Rhizopogon mood väga vähe biomassi suurtel aladel - arv vähene konk

oletaceae eosed levivad ka kehvasti

roobid üsna laia levikuga -enamus leitud ka Lääne Aafr ja Sri Lankal

Descolea, Descomyces, Setchelliogaster. Maasisesed vormid on tekkinud ja iseseisvalt ka radieerunud palju kordi kõigis klaadides. Naucoria ja Hebeloma mood kumbki p

PLFA: eri okasmetsatüüpides, ruumiline struktuur vaheldub 1...4 r

n on pea kõik noored radiatsioonid. Savannid on isoleeritumad ja nende tükides esineb rohkem endemismi ning piiratud on levik

aardumisega-keskel kõrvallahtris võistleja; hübriidiseerimistingimuste lõdvestamine, helper-oligo lisamine, oligo-A saba (vähem; opt 6 nu) tõstis nii signaali intens kui valep  
, Cort glaucopus, Hebeloma 4spp, Laccaria 3spp, Lactarius delic, rufus, Lyophyllum decastes, Melanogaster ambiguus, Paxill invol, Rhizop 4spp, s

za=Tulasnella

eksisteerimine tulenes pea alati lähedastest keskkonna nõudlustest

xxx. Agariga kaetud+turvas+savigraanulid

ühel taimel üle 10 isendi ja 3 eriliiki  
introni probleem 18S rDNAs

Uus-Kaledoonia EcM taimed: Nothofagus ja Tristanopsis. Teisel alal Araukaaria mägimetsas >860 müm Tristanopsis vaid AM. Kõigil taimedel st  
katumisvõime väiksem

iigirikkus ja BD ning f-n-rühmade arv, ent proovialati ebastabiilne. Eeldab, et oleks kaasatud kõik ja vaid relevantssed tunnused. F-naalne BD vs F-naalsete atribuutide BD.

ted vs N-väetis

mesokosmose uuringute usaldusväärsus: sõltuvu

1). Efekt arv läbi pH, sest muud nende mineraalide ühendid ei põhj viljumist

g ökol; III Pez endocarpoides, Trichoph hemisphaerioides; IV: Fayodia maura, Lamprospora, Neottiella, Octospora -tuleasemetel juhul, paljud seot maksasammaldega. S; thracobia spp viljuvad alati põlenud juurte kohal. Arv Anthracobia ja Geopyxis carb lagund juuri; Kõiki muid seeni põlenud metsades v vähe, er EcM seeni. Esines Paxillus.

ised. Nime tuleks rakendada ainult üksuste puhul, mis leitud piirkonnast, kus liik on kirjeldatud. Näited: Megacollybia, Lact volemus, Amanita cae dust tekitada ristumisbarjääri; kandseente konidiogenees -palju näiteid; seente levimine üle maailma inimese abil. Tuleks ikkagi kus vähegi võimalik kasutada morfoloogili

DSE morfoloogia. Phialocephala fortinii mood HN männiga, kus korteksi rakud on sobivalt moonunud; mantlit pole, rakusis kolonis mõõdukas nii kottseened kui kandseened (arv Clavaria)

osporum + Quercus obs.

e vaatlustele

nõrgem)  
igutine Hartigi võrk

: ja N mineralis-ga. Mida EcM taimed vs AM taimed: EcM taimede risodfääris palju suuremad erin vs bulk soiliga kui AM taimede risosf; eriti N miner pot, fosfataaside ak ilga juures.

Phialocephala fortinii: ITS2: Canadas lõunast põhja ei erine genotüübid; põhjas on rohkem klaade esindatud

Meliniomyces variabilis ja Oidiodendron maius ei suutnud korralikult koloniseerida Meliniomyces variabilis ja Oidiodendron maius ei suutnud korralikult koloniseerida Rf

rad, rahvakeelsed nimed jms

jõeäärse haavikus: AM kolonis max 5-10 a metsas, EcM alates 10-20 a. Arv et haava lehtede keemial allelopaatiline efekt AM-seentele

arv AM eellased ja kaasaegsete taimede eellased koloniseerisid maismaad koos. Nimet. 'oomycetes'

Arg vastavalt. Pisonia grandis oma leviku tõttu on ideaalne seente Pacific biobeo uurimisobj. Arv Aafrika ja AUS EcM taimed on tek iseseisvalt. Hüpot, et Fagaceae on sa

stseenis vihmametsad liikusid kuni 20\*N ja toimus liigiteke. Jääajad põhj pidevat vihmametsade taandumist. Mäed ja jõed olid refuugiumideks, kus toimus ka liigiteke. Palj

CMst; juure struktuur hävib. Eriti cenococcumil

bioremediatsioon

n sümbionte kui saproobe. Kõikide AG-gruppide fülogen suur kamm

eraldamine, kasv Petri tass+turvas/vermikuliit

sed substraatide vahel kolonis astmes ja eri mükobiontide hulgas. Vaid mõned Ceratobas isolaadid (sh ka muudest orhideedest saadud) stimuleerivad idade pikkus on ü 400 bp

pöögiku eri rohttaimed -AM, DSE ja endof sagedused liigiti erinevad. AM kolonis pH tõustes kasvas, DSE ja endof oma kahanes

liikide määramiseks on fülogen-põhised meetodid paremad kui OTU-põhised  
Glomeromycota: kasv mullas, mõju kasvule, fosforile ja patogeenide vastu on evol determineeritud. Gigasporaceae erines teis

ette eri-koostisest pärit sarn proovidega  
õhulused üle proovialade, kus tugev ala efekt

stele jm organismidele. PEAB arvestama parasitidega, tehes toitainete analüüsi. PAR vähe, ent liigub läbi palju toitaineid -keystone liigid

le resp-le, mõj taimede maapealset konkurentsi ja suurendavad BD tänu koguprod inh-le. Arv toitainete-rikka kõdu olemasolu kiirendab toitainete tsirkul mullas  
maksasammaldel Rhizoscyphus ericae, mis stimuleerib risoidide arengut; spets:  
oks: ülevaade, ei sobi, sest tugev bias  
BIOLOG: ülevaade, probleemid: inokulumi tihedus, lahjendusefekt.

itud. Lähedaste liikide vaheline konkurents elimineerib ühed ja põhj komplementaarsust

est Fusarium-Gibberella-Nectria, Phomopsis ja Colletotrichum muutuvad peale lehtede surma saproobideks, ent Xylaria endofüütidid ilmselt mitte.

ökoloogia teooria kehtib väga paljuski ka bakteritel. Arve:

A virus

ri taksonitel sama evol ja ökol mehhanism

mikroseened ECM satel.

Piriformospora indica REV:

Phialocephala fortinii: ühel 3\*3m plotil 4 krüpt liiki ja v palju isendeid. Paljud isendid püüsid läbi 3 aasta ja mood väh 3m diam geneiteid

Phialocephala: kõik dominantsed liigid levinud kogu Põhja-Poolkeral; Sveits liigirikkaim ala. Kooslus ega BD ei korrel geogr, peremehe ega klima  
poud: tamme süvajuured votavad vaid öösiiti vett üles ja translokeerivad seda vaid AM ja ECM se spetsiaalne, 3 kambriga

tammel Californias: kuiv vs niiske a; nõgu vs kuiv künkas: AM domin kuival aastal kuivas kasvukohas; EcM seentel ja AM-s

lahtrid  
konteiner

substraadi rikastamine 13C-ga, 13C inkorporatsioon DNAsse, rask

DSE Costa Rica pilvem Costa Rica pilvemetsade epifüütidel -eriti veidi niiskemates Costa Rica pilvemetsade epifüütidel, esines sageli ka seenmantel -eriti maapinnal kasv

bakteri Burkholderia ambifaria isolaatide genoomide sarn

> (ITS) ARISA=ARDRA. Sekvenerimise polyakrylamiidgeel. Kõrge taust, piikide pikkuse kvantit ar bakterite (IGS) ja seente (ITS) ARISA=ARDRA. Sekvenerimise p  
AM inokuleerimine parandab oluliselt India puude kasvu kaevanduspinnasel, suurendab mikroelementide ülesvõttu üh/taim; mitte üh/g taim

altuuris, kultuurifiltraadid, puhverdatud keskkond

anipul katse. Ka lagupuidu lisamine muuse substraati induts idanemist. Lagupuidus arv saproobne seen, mis stimuleerib, täiskasvanutel moniloidseid rakke tekitav seen, ar  
Tulasnella) seen. Eri Tulasnellad eri orhideeliikidelt eelistasid üsna erinevaid agarsöötmeid, enamasti aeglase kasvuga, sageli mood sklerootsiume; Goodyera pubescens: ei

ekto-ja erikoidse MR seentel oluline roll tundra-ja boreaalse vöötme C ja N ringes. On

maksasammaldel ja algelistel sõnajalgtaimedel olemas; pär mõnedel maksasammaldel olemas tõestati maksasammaldel Kochi postuladi järgi k  
alpi taimedel AM ja DS, nende vahekord

N, P omastamine: ylevaade

N, P omastamine: ylevaade

Ericales: erikoidne, arbutoidne, monotropoidne MR. Pyrolatel mantli olemasolu sõltub

side mingite ECM-seentega

e sclerotoidea Helv lacunosal; Psathyrella epimyces Coprinus spp; Volvariella surrecta Clitocybe nebularisel; Rhodocybe stangliana; Claudopus parasiticus (Ent) Clitocyb

ZelleroM, Pisolithus, Sclerod, Laccaria,

AM seened on kontsentreeritud vihmaussi sitas, ja idanevad seal normaalselt  
Casuarina cunningghamina Queenslandis vaid AM. Üleujutatud aladel mood klasterjuuri

Glomales fossiil 460-455 MAT (enne soontaimi!), selle järgi kand-ja kottseente lahkumise kalibr 620-600 milj a t  
fülogenees; morfoloogia ja SSU sekvents ei kattu; paar u.  
Glomeromycota: uue haru kirjeldus Väikestelt Antillidelt ja Mikroneesias

Glomeromycota taksonoomia

ülevaade SSU fülogeneesist ja erinevate gruppide kirjeldan .

baktritest endofüütidel: tähtsam peremeestaimede hõimkond

ikse patogeeniks, sest kinnitub pikkjuurtele

odustamas noiaringe; samuti mütseel muruplatsidel  
juuri ja ka Cenococcumi seenmantlit  
iikul

endof Curvularia vähendab termostressi peremeestaimel nii 40°C kui 65°C juures.

iksonitele tugev toetus; Baieesia annab kõrgemaid näite kui bootstrap. Hea ka bootstrapi modif kui kasutada mitmeti mõistetavaid aligneeringuid

ened, ensüümid, ligniini monomeerid

Glomus fasciculatum arbuskulitega kadakal

Acacia Austraaliast introdutseeritud ja eriti kui veel nakatatud Pisolithus albusega, mõjutab mikroobikooslusi ja -aktiivsust, n

It leiti pms mulla mikroseeni LSU põhjal

asse ja NZL 30-50 MAT AUSst.

gaanika lagundajale

Oidiodendron maius: toodab turbapallidel ja kultuuris Cladonia talluse juures mittester

dust viljakehade laigud 20 -200 m2, enamus liike agreg. Spetsialiseerunud liikidel (25%) viljakehade prod 10%

idi. Arv Pisolithus jt agressiivsed tüved võivad muutuda ise invasiivseks kohalikule seenestikule; tahtlik mutualistide introduts on enamike sissetoo

rassidega

perdon ja Tapinella atrotomentosa ei mood EcM

kolb  
vs Actinomycetes Petri tassil



rumine äärealadel subopt tingimustes eraldatud pop-des suure sex valiku korral. Mitmekesisemates kooslustes rohkem vanu evol-harusid ja liike neis. Hoiduda ebahütl liigi a ekstinktsioonid

docarpuse-segametsas ilma EcM puudeta

Frankia IGS primer F16S gtggaccggcgattggac. BD ei sõltu kohas

õ männi idandeid

uleks lugeda valgemad tekitajateks. Jaapia ja Botryobas lagund ligniini, ent neil pole PODE; Eri pr-mä seentel palju koopiaid reducing polyketide s

glomaliin varieerub mikrosaitides ja ka taimede poolt asustatud vs asustamata aladel

glomaliin: ülevaade

vs globaalsed muutused: ülevaade

e seente introduksioon: näidisiigid, nende päritolu, kahju jms. Nii munasseened, kottseened kui roosteseened. Tingimused epideemiateg

Alnicolas väga palju krüpt liike, mida toetab 3 geeni andmed. Koevolutsiiooni asemel on ilmselt tegu hüpetega ühelt alamperekonalt teisele

klassif rühmadesse koe ja horis vs vertik leviku järgi. Ülevaade ja tähtsus rühmiti. I. Clavicipitaceae -vertik transm; Clavic-endof on entomopatog

Invasiivsed BradyRhizobiumid: AUS akaatsiatega kaasa t liigisisene geneetiline kaugus SUURENDAB seente vahelist konkurentsi ja VÄHENDAB taime kasvu vastupidiselt ootustele

roll bioremediatsioonis, võimalused, GMod, taimede juurde toomir

miidikuhilates vs mullas: kõrge BD, näiline suur erinevus, ebapiisav proovivõtt

Petri tass

Petri tass + 20\*20 plaat

it seemnepank)

hise caudatall on Russulaceae, Theleph, Clavulina; A. Montanal Russulaceae 66%, Tom, Seb ja Clavul; Cephalanthera exiguat vaid Theleporaceae Hebeloma sp.;

Frankia inokuleerimine ja kasu

DS ja AM arktika rohttaimedel sessoonselt

AM seente: Glomus cf intraradices ja Archaeospora sp kolonisatsioon podokarpuseliste juuremügarates

Aktinoriisa: levik taimedel, N2 fikseerimise kvantiteet, tai

ieeruv. Mallocybe ja Inosperma sekvensid puudusid, mida seletati asukohamaade vähese uurituse või NM-eluviisiga. 37% sagedastest DNA järjes

endof Epichloe ja Neotyphodium suudavad evol jooksul kaasas käia peremehega, tehes ise paraseksi, soodust perem asex levimist. Ia, mitme-a ja puittaimedest peremehe mittekultiveeritavate bakterite kultiveerimine: söötmes lihtsuhkru as

vs Rhinanthus-parasiit (elab paremini kui peremees on AM)

Holcus lehed vs juured: alfa-BD sama; beeta-BD juurtes kõrgem. Leiti ka Epichloe juurtes. Enamus liike kattusid ja eelistusi kui siis üksikutel see geneetika: ITS alleelid tavaliselt eri tuumades, aga ka üks tuum võib omada mitut eri varianti

AM BD uurimiseks sobib paremini molekulaarne vs eoste morf jr meetodika, sest sporulatsioon esineb vähestel ja morf on konservatiivne. Kas ee k variandid erinevad mol kella konstantsusest. Suured erinevused tulid ka taksonite valikust, kus mõnel esinesid pikad harud. 95% usalduspiiri kasutamine. Iga kasuttav ge

le 20 MAT. 30 MAT tungisid üle kuivanud Turgai lahe Aasiast Euroopasse loomad, mis arvEur väikuse ja paljude saarte tõttu minetasid varasemad asukad. Aasia ja NE-'

uagaries. Paljudel sünteesitud ka EcM puhaskult  
; ajaloolised ja kaasaegsed käsitlused

lagundavad petroo x

veetaimedel; dominandid multi-host. Veeseened nagu Tetraceladum jt

sivärvil: Pleosporales, Onygenales, Verticillium, Dothideales  
ndramullas. Märkatavad erinevused talve-kevade ning suve vahel. Molekulaarne diversiteet. Ka ACE ja Chao1 indeksid  
DSE -Ranunculus adoneus = Phialophora aff gregata; taassüntes maisil

Epichloe ja selle hübriid Neotyphodium  
Epichloë: koevolutsioon koos peremeestaimedega, moned pisiliigid levivad ka horisontaalselt, palju hübriide, peaaegu koigil korrelistel  
el samad sümbiondid, ent veidi kitsam peremees-ring. Hübriidil puuduvad tolmeldajad, miska kohasus sellepoolest väiksem  
koos/mitte ECM vs patogeenid agaril

ss tõttu

eri taimeliikidel on eri AM-seente kooslused ja erinev BD. Libliköeliste juureooodulites on muust juurestikust erinev AM-seente kooslus, kus BD

identsustasemetel. Lisaks Chao1 liigirikuse hindamine. Pakuvad, et Chao1 kõikumine ei tohi olla 2.5% (stabiilsuse kriteerium) järjestikustel näitudel. EI TOHI kasutada  
ise test  
oosluse erinevus kogukooslusest; UNIFRAC - koosluste vaheline fülogeneet erinevus (ühe koosluse kiirem evolveerumine teisest ja eri harude kall

alfa-ja beta proteobakterite fülogenees

i häiring oli vähene. Proteaceae võtsid üles ka gliitsiini ja seega arvatakse, et proteoidne juurestik omab erilist funktsiooni

ist oli parim threshold 97%; ökoloogilise temini koa pealt 98-99%.

ad eri seeneliike. Vahet pole EcM, ErM ja sapro seentel ega melanis vs mittemelanis seentel. Arv ei eelistata v kiirekasvulisi ja pikkade hüüfidega seeni, sest nendes jääb irud tek maismaaharudest

n SordM sõsarrühm; lihhenis seened pole basaalsed - pigem saproobid on.

ndike aladel. Levimine pms seemnetega. Sukulentide biomist on suguk levinud teistesse, ent v harva tagasi (arv kuivataluvuse tõttu). Üksikud levikuepisoodid on põhj. en

lehe-endofüüdid on rikkad sekundaarsete metabolismiainete poolest. Taimedes patogeene induts väiksemat metaboliitide hulka kui endofüüdid. defin. Host specificity vs host preference; soovit. Kasut. Mol-meetodeid-. Paljud lehe-endof adapt sptes-organitele. Patogeeni ja endofüüdi erinevu endofüüt Pezizula sekundaarmetaboliidid. Mida patogeensem on seen, seda lühem on latentsusperiood

fülogenees, rõhk perekonnal Geosiphon

duklik biogeo on väheut EcM ja AM seente introduts: ülevaade ja ohud: seend ei pruugi soodust peremehe kasvu, võivad stimul invas taimede invasiivsust, er männid a eul anspondi madal hind. Seene P saamise ja taime CO2 hanke näide. Seletab, miks ECM-seened ei kasva kõrge P juures ja miks neile meeldib kõrge CO2

taimekõdus kontrollib mikroobide kooslust (PLFA) taime

16S: + SSCP bakterite BD maisi risosfääris

tematoodide püüdumise moodustised: nii mitmetel kott kui kandseente rühmadel

isse muudab oluliselt mikroobide ensümaatilist profiili

lepa lisandumine kooslusse muudab oluliselt mikroobide ensümaati

Sebacinales kladist B ja n-ECM liigid kladist A on endofüüdid paljudel rohttaimedel; avaldamata andmete põhjal ka EcM mood liigid on endof bacina sp, Tomentella spp, Elaphomyces spp (?). Noorte ja vanade taimede sümbiondid kattuvad; tühel taimel kuni 5 eriliiki. Osasid leiti ka ECM tippudel

petsiifilisus ja ekspluateerijate teke pooljuhuslikult

Neotyphodium-Epichloe kompleks: Hübridid arv. Toodavad rohkem alkaloide tänu poliploidsusele. Arv. Et hübridid tek kui mõlemad haploidsed seened on juhusl. Kolo

Tetracladium veeseened on juure-ja lehe-endofüüdid maismaataimedes. Arv. Et nende koniidid kanduvad õhumullidega edasi ja teevad läbi vaheetapi taimekudedes. Muu

maksasammaldes endofüütsed seened mood palju erinevaid struktuure. Tõenäoliselt pole need igivanad, vaid suht uued. Ka paljud seenerühmad on nooremad kui maksasa lras saprotroofsed kottseened: BD ei muutu, ent soojenemise mõju on kooslustele suurem niiskes kui kuivas tundras. Soojenedes patogeene ja sa

162 N-fix)

woodwideweb

plastpotid; kastmine; liiv+turvas;

M seened: noores metsas saprotroofide diversiteet suurem, mass väiksem, ECM seentel vastupidi Penicillium nodositatum moodustab leppadel lisa-seennooduleid. RFLP järgi on ta eraldi liik

NA arrayd annavad v eri tulemusi tsionaalsusele

Ericaceae: Vaccinioideae ja Cavendishioideae Ecuadori mägimetsades: mõlemad rühmad  
Cavendishia nobilis: vaid Sebacinale B kladist  
Clavaria sp näidati antigeenidega

lasnella/Epulorhiza ja Ceratobasidium aff. Cornigerum. Mõl. Rühmad stimuleerivad seemnete idanemist vaid mõnedel orhidee liikidel.

mükoriissed OrM seened kuuluvad AG6 ja AG12. Barcodingut ei saa rakendada, sest subAG-de sisesed ja -vahelised erinevused oluliselt kattuvad. SubAG sisene sarnal  
tiamiini süntetaasi + samapalju

Calluna vulgaris - palju eri Helot harudest seeni; domin Rhizospora ericae.

mõne seeneliigiga. Laia pm-ringiga taimeliigid pärinevad kitsa ringiga liikidest - tek 2 korda iseseisvalt  
jal; Dactylorhiza baltica: Ceratobasidium albasitensis kõikjal; Epipactis atrorubens: tuhamäel Geopora sp., looduses Trichoph woolhop ja Tulasnel  
alophora-endofüüte, mis on arv patogeeneid; C. Californicumil ka 3 isolaati Ceratobasidiumit

s, Cenococcum EcM sünt; Macrolepiota procera, Phallus impudicus, Lycoperdon gemmatum, Agaricus campestris ei õn Lactarius deliciosus (arv.)

t. Tekib oksaloatsetaasi ja glükoksalaadi oksidaasi tulemusena. . Vastuoluliselt teistega arvavad, et oksalaat inhibeerib ligninaase, seevastu va-mä seened lakaaside ja oxac

lehe-endofüütide peamine vahe okas-ja lehtpuudel. ARV lahknemine ja koevol 300 MAT ???; Okaspuude okastel märgatav endofüütide koevol m

Cryptosporiopsis brunnea ja C. Ericae spp nov- CAN, kumbki ei mood Cryptosporiopsis brunnea ja C. Ericae spp nov- CAN, kumbki ei mood Er  
sesoonsus-liigiti erinev, kindla trendita  
Gel-Gro meedium AM-ja endofüütide lihtsaks isoleerimiseks juurtest. Võib kasutada ka antibiootikumidega

efekti; seemikud võivad kasu saada suurte puude hüdr vee tõstmisest; Arv. MN on neg feedback, mis võimaldab eriliikidel stabiilselt koeksist.

20\*20

2osaline

AM seened tekkinud mol andmete järgi samaaegselt maismaataimedega

## kloneerimisvead

onides mütseeliga mööda tüvesid või juurte kaudu. Seeneliigid erinevad lähedal oleva kuiva maa metsadega. Ka taimede koosseis täiesti erinev  
rus 1; Phlebopus (NM), Phylloporus 2; Xerocomus 8; Pulveroboletus (arv NM) 2; Boletus 1; Tylopilus 3; Strobilom 1; AusroBol 4; Fistulinella 3  
t 2; Lactarius 1; Nothofagusel Laccaria 3; Tricholoma+Porpoloma 5; Inocybe 11; Hebeloma 1; Alnicola 1; Cortinarius ???; Descolea 1; Austropaxi

lon rompelii, Neopaxillus echinospermus; NW-Arg: Filoboletus gracilis, Heb austroamericanum, Inoc hyperytha; Alnus -palju EcM seeni (Lact, Gyrodon, Russ 3 spp, Cort  
phylus (Sapindaceae). Phaeogyroporus -arv parasiit; Boletus, Tylopilus venezuelae; Porphyrellus -arv sapro; Phylloboletus

sis pulchra

runud üleujutustega: 1 vihmaper algul kui ujutusi veel pole 2 mütseel ronib mööda tüvesid üles 3 nematoode püüdvad anamorfid

dul, meenut Marasmiusi; Eriti Lact igapoensist peetakse parasiidiks puudel, kergelt liheniseerub. Arv et mükoriisa tek juureparasitismist selle näite põhjal

analüüs koosluste korrelatsioon: bakterite ning AMF kooslused korrel taimi koosluste korrelatsioon: bakterite ning AMF kooslused ko  
Chrysomyxa pirolata näitab eri Pyrolaceae liike va Chimaphila ja eri kuuse liike. Seen vähendab kuusel käbide hulka 37%, seemnete produktiooni, tervete seemnete osa  
l: India ookean 5 km süg: eri praimerid annavad v erineva pildi; domin Wallemiomycetes ja Malassezia.

tugevate RNA-RNA sidemete tõttu. Fragam kogu RNA parem kui pikk lõik; tulemuste saamiseks pidi püüdmisprobe olema detektorprobel v läh ja detektorprobe olema mi

männilised; Pseudotsuga vs Calamagrostis

konteiner

vs ECM kanarbikulistel

sm viljakehades

eri seened tekitavad eri taimedel kas Arum või Paris-tüüpi mükoriisat. Paris-tüüp on vähem efektiivne taimekasvu stimul ja P seisukohalt. P omast

tud taimedel seened püsivad. Soovit inokuleerida eri tüvesid, et suurendada vastupidavust

älja et eri organismide samast kohast uurimine oleks väga tõhus meetod suhtelise autokorr tuvastamiseks

terat EcM harusid pole; mikstroofiat üldiselt pole, v.a. erandjuhtudel. Mõned väljahõppavad liigid

eenis kui kõrge temp, kõrge CO2 ja N limit faktor. Hiljem paljud kaotasid nodul võime. Küllalt suur spetsiifilisus bakteriliikidele/tüvedele suguk. sees.

**Mügarbakterid:** eri liblikõielistel erinevad bakteriliigid: al

**AM tipuhüüfide eluiga 5-6 päeva, jooksevhüüfidel pikem.** 14C järgi. 14C liigub lehest hüüfi tunni-paariga

**aktinobakterid 16S rDNA:** BD, BD näitajate modelleerimine, proov

les v erin dominantid - nii Tulasnella, Ceratobas, Tetracadium, Leptodontidium, EcM Russula, Terfezia lin, jmt saproobsed Pezizales liigid

siile kogu lõuna-poolkeralt. Suguk. Tek hiliskriidis fossilide põhjal. Gymnostoma ja Casuarina on vanad perek tugeva biogeoga, Allocasuarina suht uus, divergentne ja mo

kuuseokastel CAN: domin Lophodermium piceae, mis on seal palju vormirikkam kui Eur-s; olulised rühmad ka Hypoxylon, Lirula jt. Huvitavates le mõju: pms neutraalne, harvem negat

[probleemid leviku ja elupaikade fragmenteerumise ning inbriidinguga: ülevaade](#)

ei usu et ECM seente dikarioot

ratsiooniga

**invas ristõieline toodab toksine, mis inh teistel taimedel AM teket**

del EcM (E. gomphocephala); oluline on hydraulic lift ja juured pinnase stabilisaatorina  
ed

**metanotroofid ARRAY** põhjal erinevad eri taimkatte all. Märksa ro

AM seente intronele ja LSUle multiplex PCR. Spoorisest var ei tuvastatud, liigisisene var palju suurem kui Glomus liikidevah var. K mitte-deg

acinalesB liike ja Ceratobasidium. Kõik on parentesoomide järgi eristatavad. K ITS3-Seb + NL4 v LR5

CM sünteesikatsetes: mitmed inhibeerivad

EcM-seotud seened: MRA=Phialocephala fortinii ja Micromucor (pindsteriliseeritutel); steriliseerimata: lisaks Penicillium, Trichoderma, Mortiere

ritama oksaalhapet, eriti inositol, peptiide,

Chrysomyxa pirolata nakatab sama risoomi kaudu ühenduses olevaid Pyrolaceaeid läbi risoomi levides.

uldust; kui seen on haruldane, on ka spetsiifiline orhidee haruldane. Kaitse peab hõlmama seene jaoks sobivate kasvukohtade kaitset

erinevamad kui juhul.  
e õitolumu leitud 80-83 MAT

xis Mosambiigis ja Psilocydon Maskareenidel

turvas

vaardumised; mõjutab ka vaba energia G; erinevalt teistest leiavad, et alandades sihtmärk-DNA kontsi väheneb valepaardumine; valepaardumine eelkõige distantsiliselt sar

kolbid  
Tylospora synteese eostest kasvataskus

fakult sümbiotroofsust per se ei esine, vaid tegu on eksitustega kas puhaskultuuride või kaugele ulatuvate juurte tõttu

M seentel

ides ja tarbijates võib põhj seente suksessioonistaadium ja substraadi ligniini/tselluloosi konts

rhideedel parasiit, sest ei moodusta pelotone ja koloniseerib vaid risoomi



ate seente populatsioonigeneetika: Ophiostoma, Armillaria, Mycosphaerella, Gibberella, Fusarium, Phytophthora jt. Rekombin tuvastamine, tähtsus eri kk-tingimustes, range le globaalse levikuga, v.a. Aspergillus fumigatus. Arv. Väga konidiaalse levikuga seened võivad olla globaalse levikuga, ent selle taga võib olla i LK-alalt. Mitmekesisus suurem kui Korupis ja mujal Kesk-Aafrikas

tja-Guyanas EcM metsi pole. Arv et v vaestel valge liivaga muldadel vaid leguminoossed taimed suudavad domin

suured potid

otentsiaali. Näriliste fekaalide lisamine parandab ECM mood (er augustis kogutud vs maikuused fekaalid)

idul, metsas kui cordata puhul sügavas laanes. Sebacinales OTUd ei kattu, ent mingit fülogeni erisust ei esine. na, Geopora ja Genea; vähem muudega (ka Hydnotrya ja Helvella, Tom, Russ). E. atrorubensi seemikud assots ka Trichophaea liikidega, mida hilj Oryza juured: kultuur vs otse kloneerides. Otse rohkem, domin kandseened (63%), er Trichosporon, Wallemia!!!, Mycenaceae (0.5 um võrgu korral). Väidet Wul et al. 2001 ei saanudki leida ülekannet kuna katsid taimed kinni ja seetõttu need ei transpireerinud.

ilma AM seenteta taimesuguk globaalselt, erandid; arvatavasti moned taimed ja seened ei suuda kinnituda omavahel

100 000 eost poti kohta parim

is liikidel. Casuarina liikidel EcM kolonis väiksem ja tihti nõrgalt arenenud HN. Suiloidid ei nakata ühtki. Optimaalne suhkruisaldus söötmes 0.5%. Välivaatluste põhjal /

need on suht haruldased.

rius, Amanita, Scleroderma bakterite ja aktinobakterite suksessioon juurtel ja mullas erinev; ve

Afzelia: vaid seemikutel  
ütidet on EcM, aga tegelikult mood vaid seenmantli männiga, mitte midagi kohalike puudega ja AUS akaatsia raport on arvatavasti reostus

tandikus; Type5 = MelinioM. bicolor

la

ra lini); tasakaal: resistentseid populatsioone ründavad agressiivsemad vormid ja norku vorme avirulentsemad

Glomus

s NAAT transektil: EcM seente BD väheneb põhjapoole, lihheniseerunud seentel kasvab. Seenekooslused stat oluliselt seotud taimekooslusega arv

364 357

314 savikuulid 314

ikrokosmis induts kiiremat substr lagunemist, kuna ühed seened induts teisi. BD efekt suurem tselluloosil vrd keerukamatel ühenditel

ebasobivad kombinatsioonid

JPN segametsas eri JPN segametsas eri puuliikidel: AM-taimedel palju EcM seeni ja vastupidi; ainult 44% AM-puude juureproovidest identif AM

s ka Otidea tuomikoskii. Toitainetest mõj EcM kooslust enim NH4. Peremehe-spets liike v vähe

bakterid stimuleerivad OH radikaalide tootmist monedel saprootroof

10 korda rohkem eoseid vaja e

ckas metsas; varise lagunemine Gilb metsas >2x aeglasem ja N kättesaadavus 3x väiksem ning mikrofauna mass 5x väiksem. Arv monodomin liigid modif oma keskk nii et

hloeam peavad vastu ja muutuvad dominantseks, seevastu EcM Caesalp ei pea vastu. Uapaca enam-vähem. Hiljem tuld-taluvate puude varjus rohtu vähem, seega tuld väh

iondid või muude taimedega või saproobid

meid, et linnud neid juh nokiks. Pole teada ühtki mürgist hüpog seent. Vastuoluline, kas seedimine stimuleerib eoste idanemist ja EcM kolonis v **arv maasis viljakehadega seent**

l kirjutas Frank taimepatogeenidest

**AM kolonis globaalselt: ei leitud eriti olulisi tegureid. Korrel-**anal jaoks n liiga väike. AM pole harvem ökosüsteemides, kus mullas suur C sisaldus

.ithocarpus, Castanopsis;

**juurepikkus kolonis ECM** ja DSE kasvab pajul kiiresti kaugemale liustikuservast

olylbia ECM; Cortinariu sp ja Chroogomphus spp saprootroofi-laadsed mustrid. Saprootroofidel jagunes ära kõdu ja puidu kaupa; samuti liigisiseseid erin väiksemad kui liik

**juure-endofüütidid on** nested osa risosfääri mikroobidest; oluline roll taime immuunsüsteemi **juure-endofüütidid** on nested osa risosfääri mikroobidest; o

aliseenunud keriloomade püüdmiseks  
rpa shanori: 10% eostest idanes kiiresti

**OrM: Ceratobasidium vs Spiranthes: morf ja aktiini paigutus** mykoriisa tekkel ning lagundamisel

üp9 nullmudelit, ent mitte tüüp1;

l orhideede idanemist ja arengut (Lenzites, Trametes)

**Chaetothyriales: Phialophora, Exophiala, Cladophialophora** on seotud fülogeenidega.

**Cephalosporium** Antarktikas: tallus kolonis Rhiz. Ericae poolt kõikjal saartel . Minimaalne geneetiline varieeruvus.



svab kuuse juurtes rakkude sees ja mood pinnal õhukese mantli. Hartigi võrgustikku ei täheldatud. Taimed ise kasvasid jõudsalt ja olid hea tervisega

asümm taimede ja tolmeldajate vahel  
nevad dominantidel

gid

skedele; Liigirikamatel puudel oli kõrgem ensümaatilise pot. Aktiivsus; kõrgem ensüm pot aktiivsus korreleerus suurema taimekasvuga; Theleph

**Cryptosporiopsis** spp nov Pezicula klaadis -ericaceael

**Piriformospora indica** -sam 18S rDNA Ceratobasidiales [hiljem Sebacinales Weiss 2004] isol india kõrbest AM-klamüdosporist. Kultuuritunnused: õh kestad, dolipoorid

%, perek tasemel 95%. 97% peksab kokku liiga palju liike. Mõnedes genoomides 16S ko **rDNA: 1-15** koopiat, pms 1-7; koopiate arv pole seotud g

id, mis tapavad teisi lepatriinusiid

asidiaceae (Thanatephorus -multinuc), Ceratobas (1-2 nucl), Waitea anamorfidega. AG rühmad ja nende siseselt ISGd -erinevused DNAs ja biol f

leks: ristumise baasil morfoloogilised liigid on samad bioloogilised liigid, bioloogiline liigikontseptsioon tihti parafüleetiline DNA fülogeneesi jr; areng eri mandritel arv hil

**Piceirhiza bicolorata** -üks isolaat mood nii EcM kui ErM

Laccaria bicolor ja Mel bicolor mood eksperim tingimustes paunakesi kan

vides

x

Muutused albeedos ja kõrbestumine. Pms inimasustus vähendab biodiversiteeti elukohtade hävitamise ja fragmenteerimisega

erinevad AM seened soodustavad taimede produktiivsust eri viljakusega keskkonnas. Seente liigiline koosseis (sampling effect) ja head seened m  
**Agrocybe praecox** stimul Vaccinium corymbosumi kasvu paremini kui R.

**Campylobacter** spp identifitseerimiseks array: 2 geeni, iga liigi geer  
**Listeria** spp identifitseerimiseks array: 1 geen, iga liigi geenile 10 pr

bakteritel eri keskkondades: shotgun sekveneerimine. Eri klassidel :

**Hymenoscyphus**; ECM=ericoid?

enamus juure isolaate ja **Piceirhiza bicolorata** sümbiont kuuluvad Helotialeste hulka enamus juure isolaate ja **Piceirhiza bicolorata** sümbiont kuuluvad Helotialeste hulka, er

avastus, et ErM ja ECM seened on osaliselt kattuvad (Cadophora finlandia) loob uued

taimlatest kuuse risosfäärist suur hulk seeni, millest mõned (Cylindrocladium) assots juuremädanikuga ja teised võimalikud biokontrolli agendid

elurikkust. Suurenesid N<sub>2</sub>O emissioon ja P leostumine.

AM-seente realiseerunud mitmekesisus suurendab prod. Statistiliselt eemaldati erinevate liikide efekt eraldi.

rhodontia + Schizophoraga)

niidul puu all vs eemal; vähe mõjutas fenoolide lisamine, tugev mõju männiokaste lisamisel. Fenoolide 13C PLFA: olulisim puusniidul puu all vs eemal; vähe mõjutas fenoolide lisamine (inakt -rDNA põhjal) diversiteet sõltub mitte taimede liigirikkusest, vaid unimodaalselt mullaressursside rohkusest. Taimede liigirikkus mõjutas koosluste struktuuri, ent see ei mõjutanud

eri peremeestel: spetsiifikaat ja peremehe-eelistust pole. Kultuuri ja otsese s

supresseerib ECM puuseemikutel

niliselt

-12.3 kg/ha. ECM seente ja saprootroofide eristamine PLFA 18: 6,9 jr värsketest -5 kuud seisnud proovidest. Huumuses vahe palju suurem ehk saproobe palju rohkem

seentest

läbivoolustiteem konstantse kasvukiirusega

Dothideomycetes, Sordariomycetes domin. Kandseentest domin Agaricales, Aphyllophorales, Boletales. Sesoonsed muutused esinesid klassi-ja madalamatel takson-tasemel. Temperatuuritundlikkus kõigil protsessidel, laborite vahel pole võrreldav

Phialophora finlandia (Cadophora finlandica hiljem) ja Phialocephala fortinii kirjeldused - erinevus Phial dimorphosporast; Chloridium paucisporum kirjeldused

Cryptosporiopsis on pms Pezizula ja Neofabraea anamorfid. Esinevad tammel, haaval ja ka Ericaceae ilma ErMta. endof Populuse juurtes, mitte-patog.

paikneb Helotiales ss. Sees. Helotiales ss. Esindab kõikvõimalikke troofilisi vorme v.a. samblikke

Thanatephorus spp, Ceratobasidium spp, Tulasnella spp, Sebacina vermifera

dega, peale põlengut mood viljakehi. Mantel õhuke, HN fragmentaalne. Sarn Ruhlandiella. Puhaskult sünt ECM paljude peremeestaimertüüpidega

edased perek -Sebacina vermifera; Diuris spp. -Tulasnella calospora

eri triibustel ja perek pms eri rühmad. Eri taksonitel erinev spetsialiseerituse tase. Idanemisel spetsiifilisus samuti väga varieeruv

vaheseinteta, ent mood klamüdospoore. EcM tekkis Eucalyptus, Leptosporangium, Melaleuca, Pinus kesyia, Quercus ilex, Brunonia (Brunoniaceae), Poran

dneri OrM partner) mood EcM Melaleuca

ezizales spp. induts paari liigi kasvu (Lobelia gibbosa, L simplicaulis) juhul kui need seened olid seotud kas eukalypti või Melaleuca, Laccaria oli patogeenne.

Sebacina vermifera EcM süntees Leptospermumiga. Isolaat (RT42, C734) mood ka OrM Microtis rara albiinodega, mis jäid ellu. Teised Sebacina Maurilabra (mitteMR), Peziza tenacella (mitteMR), Pulvinula archeri (mitteMR); Geopyxis carbonaria (mitteMR, Morchella elata (mitteMR); 1-3 a Pyronema omphalodes

ljud Austreaalia taimedel

Inuleaega (sh Podotheca angustifolia, Gnaphosia aff. Skirrophora, Waitzia citrina)

i isolaat1 sarn Sebacinaceae; Rhiz gardneri isolaat2 = arv Thanatephorus sp nov gardneri (mood ka ECM eukalyptil ja Melaleuca uncinatal)

s spp vs Tulasnella calospora jpt. T calospora on parisperemeeseen, mille isolaatidel erinev efektiivsus seemnete idandamisele. Ei soltu e OrM: seemnete idandamine ju

atud nihe ei võimalda obj hinnata B BD proovis

segatud olek mitmel tas.

sõltub enim mulla C:N suhtest

seente-bakterite suhe sõltub enim mulla C:N suhtest

seejuures f.ülogen sarn pole mõju; õietolmu kinnitumiskoht oli veidi konserveerunud; iga perek v alamperek oli spetsialiseerunud teatud seenerüh-  
seisvalt tek mükoheterotroofsed liigid; Teised taksonid on jällegi putukate petised kas läbi nektari puudumise või seksuaalse petmise (putukaliigi-spetsiifiline), mis on palj

sega. Gyroporus castaneus, Phlebopus portentosus kosmopoliidid  
alaasias v palju liike. Boletus spectabilis ja B. Xylophilus kasvavad puidul. Paxillust vaid 2 liiki. Pakub et ka Eugenia syn Syzygium mood EcM

usega (=Phaeogyroporus). Mitmed Boletinelluse liigid ja Phlebopus tropicus on arv seotud hoopis AM-puude ja täidega. Horakiella on Sclerod sugulane, Chamonixia on C

st võetud liigid

AM inokulumi pot on EcM Tsuga aladel väiksem Thuja jaoks. AM kolonis piisavus oli määrav Thuja kasvu jaoks. Tsugal elt

ega, teised seened jm organismid kunagi ei amplifitseeru. Saadi kergesti kätte ka mükoriisadest.

; pH ja Ca konts peavad olema üle teatud piiri; steriliseeritud muld nakatamiseks parim; mittesteriilne vajab suuremat eoste kontsi.  
ihenis ja mittelihhenis saproobne kottseen on jaotunud samade seeneliikide vahel

nplif ka Helvella-spets praimerid. Kultiv ei õnnestunud

remellales, Auriculariales, Sebacinaceae

ialsest. Jaguneb kaheks grupiks: 1. S. Vermifera+ Piriformospora AM-taimedes + er Sebacinales: taksonoomia, süstemaatika ja ökoloogia. Seotud perek Geastrum basaalse  
Seb1, NLSeb1R, NLSeb2R. Isolaadid juurtes samad liigid kui EcM, ErM ja OrM seentel

taime juurekultuuride tegemine Agrobacterium rhizogenes abil

aria ainult puidus, ent mitte steriliitingimustes. Liparise kasv värskepuidusöötmel koos seenega parim. Goodyera idanemiseks sobivad paremini täiskasvanust eraldatud seer

AM vs juurepatogeeneid: ülevaade. LOENGUD

nata tulemused, 2. meta-analüüs; 3. uued üsimumused; 4. suurem tsiteerimine ja kasu; 5. uued õpetamis ja õppimisvõimalused; andmekadude vähend.

vahelised seosed; NC põhjustavad tegurid

kem, paljudel puuduvad adaptats-võimalused külmemaks kliimaks, troopikas rohkem aega liigitekkeks ja segeli suurem evol-kiirus

juureseened rohumaadel: PDA isolatsioon, morf + ITS sekveneerimine: liigirikkus, BD (Brillouini indeks: LINK VABAVARALE) erinev sesoonselt ja erikasutusega rohur

Phialocephala dimorphospora (mantliga endof, stimul kasvu pH3 juures, mitte pH 5.7), P fortinii (steelis, lagund rakke, inh kasvu pH 5.7 juures, pH3 sama), Phialophora f

indlustab end kõikvõimalike kk-muutuste jasuhtes ja optimis kasvu heterog kk-s, võimaldades võimalikult rohkem sümbiontide hulka

samas head levimistingimused

irasiteerib nurmikal ja moodustab noiaringe murul

tiokastel. Männil domin seenel ja kuusel bakterid, hiljem hakkavad bakterid enam domin. Mikroobide biomass suureneb ajas.

Epacris AUS: kultuuris domin Helotiales, leiti ka Cenoc-basaalne takson

kottseened maksasammalde endofüütidena Antarktikas

10 peremees Pinaceae, Fagales, Fabaceae või Salicaceae

Kanada arktikas paljudel EcM ja AM taimedel: domin Phialocephala fortinii, P. Sphaeroides, vähem Leptodontidium orchidicola  
õmused keskkonna DNA kloonimisega, v.a. Andmebaasis mitteleiduvad liigid

õgmendid

lekes. Nende kahjustused kohalikel puudel, kohalike seente adapteerumine eksootiliste puudega ja tagasileviku ohud

duaalsel levikumustril paljuski varjutavad väljasuremised. Tuulega võivad levida väikeste seemnetega taimed nii mööda läänetuuli, aga ka vastu koos tsüklonitega. Ka lin

Lycopodiaceae sporofüüdid ja gametofüüdid mood AM. Gametofüüdid on mükoheterotroofid ja seonduvad vaid nende Glomuste rühmadega, mis

pilliroo juurtes kultuur + sekv ITS; juurtes suurim BD kuival pinnal (Cylindrocarpon, Trichoderma), nii kival kui märjal juurtes (Bjerkandera adusta, Arthrinium); lehtedes  
AM mol BD pilliroo juurtes: kas praimeid nii tava-Glomustele kui ka spetspraimerid eristunud rühmadele. Leiti 35 liiki, sügiseti rohkem kui muu

eriti pikaajalised - 2.5a

saproob (vb ka lähedased liigid armillariiformis ja nauseosa) oma kasvukoha ja C-ühendite kasutamise ning 13C poolest. Kasvab rohumaadel, kus  
proovidest); ei mõjutanud teiste seente liigirikust; eri EmH-liivaproovides biomass jäi 0 ja 5.6% vahele (keskm 2%) RT-PCR põhjal



muse. Ka kõigil teistel EcM rühmadel on CBH puudu vrd lähedaste saproobsete rühmadega  
tades Aasias peremeestaimi. Siiski on tundmata PNG-s! Eur-s arv. väljasurnud

atmosfääri mikroobid: dormantsed aga v paljud ka aktiivs  
e meretasemete kõikumistega 47-4 MAT Gnetum ja Welwitschia eraldusid umbes 130 MAT, Gnetales ja Pinaceae umbes 275 MAT

Petri tass

mikroobide liigirikkus-ala suurus väikesed z-väärtused tul

ikutüübid, massikadu kasel, männil, definitsioonid

ia hulka

tiiv) ja troop pop-de väiksusega

juuretippudest leiti väga palju EcM-kaaslevaid seeni (25, millest 23 Helotiales)

JPN kõrguse kasvades AM BD ja kolonisats väheneb

klaasist: 35\*25\*1,7

280\*150\*15

tsetes stimul taimekasvu

lavad EcM seentest palju paremini lagundada glükoosamiini ja atsetüülglükoosamiini ning nende tanniniseerunud ühendeid. Seepärast arv, et saproobid on vajalikud miner

puudel Etioopias AM

Podocarpus ja Juniperus erinevad AM-seente akumul liigirikkuse ja AM koostule struktuuri poolest Etioopias  
mitmekesisus Prunus africana: v palju Glomus spp, 1 Archaeospora sp; teisi ei olnud arv praimerite tõttu

kolonisatsioon palju kõrgem luite vs segamännikus

Rhododendroni varis lagun aeglasemalt kui lehtpuudel ja sisald rohkem tan  
Rhododendron maximum ErM seened metsas: pms Helotiales, Capronia ja

Gaulthria: MR diversiteet 2 kasvukoh x

juure- vs risosf vs m juure- vs risosf vs mulla seente BD hernel: juurtis vähim, mullas rohkem; kooslused muutuvad haigetel taimedel  
ülgavuti

dega mükoriisat. EktoMükoriisa süntees Cerat1 linidziga

naga

esculenta, Lepiota, Collybia confluens, Clitocybe gibba, Chalciaporus jpt saproobid ja EcM seened

Eripära, ECM ja vK inokulaat, aeg

se morfotüüpidega JPN eri paigus

mitmete võrdlus

vrd ECM seentega, fakultatiivne mükotroofsus

kolb, edasi pott

erinevatel lämmastikutühenditel

Phialocephala vs ECM vrd Ericaceae lähedus

ühe Russula liigiga

nentella ja Russula liigid. Taimed jäid ellu kõige valgemates tingimustes

mangroovidel CHN. AM kolonis madalam sügavamal vees; liikide määramine mudas olevatest eostest

nataceae eraldi ja Suillineae eraldi

lling: kontrollis EcM seened Cortinarius, Atheliales, girdling: Helotiales, Serendipitaceae, Ganodermataceae. Bakteritel muutused väiksemad: vähe  
a Geochipi andmeid. Phylochip võtab dominante ja sõltub ikkagi PCR ja DNA eraldimise kõrvalekalletest; Phylochipi ja Real-Time PCR andmed

**Phialocephala fortinii** Asparagus officinalisel: PILDID, arv -patogeeni ja kommensaali vahepealne; penetratsioon juurekarvade kaudu paisunud apressooriumi abil 7-10 p

eri liikidel seened kattuvad vähe, eri perekondadel üksikute eranditena. Juurtest otse kloneerimine ITS + mtLSU

sidiumi ja/või Botryobas liikidega (A. nipponica eri paigus kindla Cerat liigiga)(sõsarperek Neuwiedia seot Tulasn-BeratoB) - seega arv SeratoB o

ekesisus sõltub taimede biomassist, mis omakorda on seotud taimede liigirikkusega Tilmani plottides; **mikroobide PLFA** mitmekesisus sõltub taimede biomassist, mis om

exico kõrbes -EcM taimi pole teada ja eluviis teadmata

iriramura kuumutamist domineerisid Podospora, Trichoderma, Penicillium. 70°C ja 85°C vähendasid oluliselt liigilist mitmekesisust. Ka tuha lisamine vähendas liikide arv

astu

liigispets MHB d=5\*18; vermikuliit

troopikas sõltuvus mükoriisast ja AM kolonis vähenevad suks staadiumitega. Mida väiksem on seemne mass, seda suurem on sõltuvus Amst ja se  
troopikas sõltuvus mükoriisast ja AM kolonis vähenevad suks staadiumitega. Mida väiksem on seemne mass, seda suurem on sõltuvus Amst ja se

gute andmete põhjal on tegu Tomentella liigiga

psis, Tulasnella (+ 2 Sistotremat). Orhideede seemned idanesid metsakõdu all sama halvasti kui laboris, v.a. Üksikud erandid. Need, kus id: **Orhideede seemned idanesid n**

r Lähis-Ida

Rhododendron Hiinas: pms kottseeded isoleeritud. Vaid pooled fülotüüpid

tukasümbiontsed rühmad

rite kasutamist

heterogeensus väike, on tugev konkurents ja log-normaaljaotus, kus üks neist on, siis väga suur diversiteet bakterite diversiteeti mullas mõjutab C-rikkus, C-heterogeensus, ko  
ygu-genoomi arrayd

pid pole üldse eristunud -arv geenivah esineb järkjärguliste lühikeste eoste levikutena

süsinikuringe. Väga palju C mullas glomaliinina, mis on väga pika elueaga

Helotiales endofüüdid Deschampsial ja Ericaceae liikidel suures osas kattuvad. Mõlematel liikidel parandasid endof N omastamist, k.a. Ph. Fortinii  
iigid on N-mikstroofid, kuid mitte C-puhul (v.a. Orthilia secunda v varjukas metsas Pyrolaceae (40-83%) ja Orchidaceae (Platanthera leucostachys: 25-32%) mitmed liigid  
on spetsialiseerunud vaid Tomentella liigile



geneti tihe seente võitlus, konkurents pindsteriliseerimine taimekasvu r ECM inokuleerimine (ja kasvatamine ECM eraldus, säilitus

juurtes oli palju Actinobacteria. Baktereid juurtes mõjutas sesoonsus, seeni mitte. Bakterite ja seente kooslus korreleerus 6%

te bakterid: 454 metatranskriptoomi uuring

mutada altern univ-praimerit parema resolutsiooniga. Leidsid takson-spetsiifilised thresholdid eri organismidele ja markeritele

tu, ent need on ökol. vähem kohased.

tud ( $R^2=28\%$ ). Paljud euk ja prok OTUd on tugevas korrelatsioonis ( $R < 0.77$ ). Enamus OTUsid unikaalsed, ei vastanud GreenGenes ja

rrrel taimede funktsionaalse beta-Bdga; seente Filo-BD suureneb kõrgusega!! Seenekooslust seletas enim mulla pH ja P. 61% seente-BD

Mortierellales ja Helotiales. Seente elurikkus ei muutu liustikust kaugenedes, ent bakteritel väheneb. Seente elurikkust ja koosseisu mõjut

standard lahendused bioinf analüüsiks ja OTUde nimetamisel, et oleks võrreldavad.

i võrra: denitrifikatsioon kasvab, geenide suht G+C content kasvab, CO dehüdrogenaas, respiratoorsed geenid kasvavad, bakterite ja seen

akistab praimerid disain. Shotgun võimaldab assembleerida täisgenoome dominantsetest organismidest; Array puhul geenide/organismide  
match-seost pole. Vähi-kallutatud ülevaate annab Illumina-põh metagenoom.  
uldaste liikide ohtrust vrd metagenoomiga.

. Uued praimerid Bakteritele ja Arhedele

aimeliigid ja mulla vanus määravad suure osa AMF kooslusest, ent nende osakaal jääb ebaselgeks

geenide produktide kokkusegamine ühiseks NGS analüüsiks. Lühemad jupid tulevad rohkem esile. Altern praimerite vahel on teatud eripi

ktuuri

t mulda. 600-1000 sekvensi proovi kohta pole piisav

t. Eri bakterirühmadel erinev pH optimum; mõj ka kooslust

ht madal; kvantit ebatäpsus tuleneb arv PCR probleemidest; soovit kasuta väh 2 PCRi ja väh 2 rmtk ning kvantiteedi määramiseks kasuta

i OTUde arvu vrd paarikaupa laigneerimisega; >90% artefaktsetest OTUdest olid singletonid, ent esines ka üksikuid doubletone ja triplet

Onito G, Anslan S, Abell S, Abarenkov K. 2014. Global diversity and geography of soil fungi. Science 346: 1078.

õab tugevasti koosluse str.

lo M, Garcia MA, Ge ZW, Griffith GW, Griffiths K, Groenewald JZ, Groenewald M, Grube M, Gryzenhout M, Guo LD, Hagen F, Hambleton S, Hamelin RC,

õdel orhideedel N ja vähematel C miksotroofsus

õamus olid kimäärid). Barcoding kriteerium 99%, prooviti ka 98% ja 97%,ent erilist vahet polnd

liigisisene antagonism

omavaheline asetus, mikroskaalas, konkurents, kooselu

liigirikkus väheneb; seened liigivaesed, sügavuti liigirikkus väheneb. Seentel 18S rDNA, Kowalchuk 1999 praimerid ja metoodika

DS jaoks:pikk

ui kohalikud AM seened. Intsia kasvule AM seentest rohkem kasu kui Ec Intsia palemban Intsia palembanica saab EcM seened kui kasvab Dipterokarpide lähed valikraiega alal tugevas korrelatsioonis ECM kolonisatsiooniga (Intsia)

l EcM. Kahtleb raportites, mis on tegelikult valed. Aafrikas olid arv. dipterokarbid olemas enne leguumide EcM teket.

nõjul

kas eri arvu sümbiontide hulk mõj taimekasvu. Teor lähenemine

Sebacina spp: v väiksed genetid, samas juures palj 30..60 s H2O2

Capronia Gaultherial



normaalne suksess; redundantsust on v raske mõõta. Suurtes kooslustes on portfolio efekt = sampling effect

aceae, Crassulaceae, Proteaceae, Santalaceae, Zygophyllaceae, Restionaceae, Cyperaceae. Erikoidid seal kasvavad läbisegi muude taimedega

taimekasv ja ECM mood parem noortel nulgudel mullal kus orgaanika eemaldatud

Azospirillum

lumide jr; Sebacinad 1-või 2-tuumalised, orhideedes kultiveeritavaid Sebacinasid polnud, esines vaid Tulasnella

Pisolithus

Pisolithus

vanad vs noored kultuurid: N omastamine

ob pylori vähendab teiste liigirikkust

ohastumused, hotspot

amuutustes

5 ja 99% ITS identsust barcoding kriteeriumina. Endofüütide puhul ei saa kasutada säärast kriteeriumit üldse. Domin LeotioM, DothideoM, SordarioM. Soovit !  
SordM, DothM, boreaalne mets: DothM, SordM. Fülogeneet BD troopikas väiksem kui parasvöötmes  
Ine teke eriti parasitiidest ja ka teistest, ent harva vastupidi; VIGA: ei võetud analüüsi mullasproobe

a unikaalseid; endofüüdid suht spets, samas kui epifüüdid on pms generalistid-saproobid; Spetsiifika on pms perek-tasemel; Biogeo: bon  
; kui levikus . Nii patog kui endof seened eelistatult levivad putukakahj kaudu lehtedesse

näited

hirvesitaga: vaja väh 10e6 eost, parem juba 10e7

kahe klaasi vahel EcM süntees

udsid sinna India subkontinendilt hilis eotseenis  
ive 5st induts dihhotoomsete harun teket ilma auksiini osaluseta männil

e (3%); metaandmete vähesus inh analüüsi; hydrothermal vendid on suurima arhede linidzirkusega- arv arhed seal tek.;

rime N-ensüümidele. Seega enamikus kooslustes on mikroobid C-limiteeritud. Mikroobide ensümaatiline toodang erineb taimede omast;

v kimäärde läbi. Seetõttu proovide kokkusegamine on halb lahendus

i: kuivatamine kiirendab eoste idanemist agaril. Idanemine parem askusest valla pääsenud eostel

ECM kultuuristamiseks parim osmium Afzelia africana -tsesalpiiniline-ECM süntees õnnestub vaid sama pu  
eet

huumuse lisades juurte kasv väheneb, eemaldades suureneb

agaril: ECM vs mikro-ja makrosaprotoofid. ECMküllalt ülekaalus

phetäisid, ent meelitavad parasitoide

Amanita muscaria Uus-Meremaal tamme ja kase pargis. Genetid v suured ja kattuvad, samas ka v väikeseid geneteid. Arv A. Muscaria levib ja nakatab ka eost

kevadepuudel ja vanadel puudel on seotud ainete taasomastamisega surevatest kudedest; ka ECM seente genoomides pole tõendeid laguens olen

a spets funktsioonide olemasolust

i PLFA jr

-talv>suvi>stügis. Seente osakaal vähenes N-väetades

rhacomitriumi risosfäärides vrd teiste taimede ja palja mullaga

ii; hübriidsatsioon kui liigitekke mehhanism

radel ja kuival suvel; lipiidkehad niiskel suvel ja sygisel

d v palju lipiiditilku. Pakutakse mutualistlikku kooselu

oole jõudvaid liigikõveraaid. Vigadeparandus kahandab OTUsid 10x

ECM konkurents

N, P sisaldus, r

inoolumi potentsiaal linnast vs maalt võetud pinnasega, erinev vrd or

ires või lehetükis võis olla koos 4 eri seent

Scleroderma Gnetumil: parandab P ja N kättesaadavust, seda ka nõrga P-

inokuleeritud tammedel püsivad Scleroderma ja Pisolithus väh 2 a nii tavap MMN-segu ja ka viljakehatükkidega (Scleroderma, Pisolithus: v hea ' taimekasv vs ECM kolonisatsioon vs eri väetishulgad

liigisisene antagonism

Rhizopogon vesiculosus ja vinicolor: üks R vesic genet ühendab väh 19 puud ja 21 m vahemaal; R vinic genet ühend väh 10 puud ja 12 Rhizopogon spp sõsarliigid eri sügavusel

na stimul ka patogeene (surub peremehe kaitsevõime maha) ja AM seeni

nistel jäävaheaegadel on mitmed teised puuliigid kaugele põhja levinud, ent praegu refuugiumites vaid. Jääaegadel Eur-s palju steppi kui

: kõiki taimerühmi eraldi. Palju avaldamata andmeid.

ingumine sekundaarselt; kands hargn 440 Ma; Lecanorales 240 Ma; homobas klaadid ca 200 Ma, Pezizales suguk 150 Ma

ra jt

ebatsuga seemikute koloniseerimine teoste ECM seente poolt palju aeglasem, kui puu inokuleeritud Rhizopogoniga

id. Pms kottseened, v vähe kandseeni Trichosporales. BD suurim bulk soilis

Russula brevipes ei esinenud 230-1090 m kaugustel populatsioonidel mingit erinevust. Arv et see näitab ef näriliste või tuule abil levimist

Russula brevipes: geneti suurus 3-18m

le ammu ühtki Ericalest kasvanud. Erica vs Quercus mullast saadud tüübid olid v suure osas kattuvad. Arv elavad ErM seened kas saproobidena või puude end erikoididele: saavad erikoide MR

Geosiphon, Gunnera, Cycas, sõnajalad, sammaltaimed

Tuber melanosporum: mikrosat (viletsad tulemused) + RAPD: ühe puu ümber keskm 2 genitit, geneetiline varieeruvus kasvab puusisene < puudevaheline < p

ib stabiliseerida mutualismi

lembola>Enchytr

metsamuld

Tulasnella spp Cryptothallus mirabilisel, taassüntees mikrokosmoses, 14C kanne per

anthera chlorantha: Tulasnella, Ceratobasidium, Phialophora; Epipactis helleborine: Ceratobasidium, Sebacina, Tuber; E. distans: Ceratob, Tulasn; E. palustris: t  
d Sebacina-Serendipita rühmaga või kottseentega (niisketel aladel, sh rabades)

substraat, mirolaineahj biomass

troofe v paljudes taimede taksonites. Monotropoidide peremehevahetused on v erinevad taimepatogeenide peremehe vahetusest; sõnajalgadel gametofüüdi staa

s1998. Qrv on parentesoomi aukude olemasolu labiilne tunnus: tek ja kadunud korduvalt. Arv on kukeseentel holobasiid tek iseseisvalt. Kantharelloidid on erak

EcM harudest tek mükoparasiidid jt par.

metüülamiini ja ettekasvatatud Paxillus Petri tassis + puu

saprotroofid

isem



dipterokarpidel EcM inokul palju kasu kasvu ja ellujäämus

akad biogeogr ühendused S-Am-ga

alamsuguk tek vara-paleotseenis v varem

Laccaria sp. Inokuleerimine inhibeeris Thelephora kolonisa mass: mändi mõjutasid paremini Laccaria spp, kuuske Thelephora (mitteoluline)

kask tsellofaanile, kus kasvab seen

tsiaal: aastaajast ei olene AUS. Mirbelia diletata ja Eucalyptus calophylla reageerisid v erinevalt sama proovi mullale, seega arv. Et seonduvad eri liikidega. Toie varieeruvus 10-cm skaalas, mulla häirimine vähendab EcM inokpot Mirbelial, ent mitte Eucalyptil. Arv MR hüüfid olid inokulumiks selles mullas

avarjau ja seen suhkruid

vide kaupa: NM pms parasitidel, karnivooridel, klasterjuursetel, hüdrofüütidel. Definiitsioon ja diagnoos EcM ja AM taimedele, ülevaade 4. Lisaks obs istandikes kaht kottseent: 1 mood koniide ja oli must; teine mood pisikesi pükniidieme eoskottidega

lepp: seemened sterilis H2O2-veeagar-agarsööde-edasi

vs. 2 ja 4 kuud peale inokuleerimist; vs N-väetamine

-erinevused minimaalsed

Hebeloma sp võrdlus eri in vitro tehnikate vahel-erinevused minimaal

ases, kütud pinnases ja suksessioonisel pinnal

Suillus pungens genetid enne ja peale tulekahju: täielik kontrast-suured vanad genetid asendusid uute väikestega

ad iga 4 aastaga pärast seismist järjest paremini

vs ECM diversiteet

i akt puidus minimaalne! ensüümide aktiivsus erines tugevasti nii liigiti kui substraaditi ja interakts. Arv et EcM seentel võib esineda tugev kõdulagund akt talve

elumust ja kasvukiirust. A) ergovaliin B akumul? B) viletsamas seisus herbivoorid?

eelgi vastuvõtlikumad lehtedäidele, endof-taimedel tekib tugev lisaresist ning loliini sünt tõuseb 2x. N-väetamine suurendab seenega taimel haava-induts resist te

saprobide kultuuride säil

kasv parem iso x

biomass Pisolithus: liigisisene ECM moodustamise varieeruvus

Inud erilist vahet

juurte hoidmine füsiol soc

erumine substraadile, vähe poliploidiseerumise ja hübriidiseerumise tagajärjel spets. Aseks liigid tek korduvalt, pms noored ja pms tugevalt spetsialis. Arv. esin

Armillaria vs Megacollybia antagonismikatsed

l. Sek koloniseeris ka kandseene ECM -hartigi võrgustiku rakkude vahel. Sellinsed struktuurid püsivad suvest talveni ja arv on aluseks kevadisele viljakehade te  
:aria mantli, e *Cylindrocarpon destructans* vs *Paxillus involutus*, *Laccaria laccata*. Puhaskultuuris Pax > Cyl > Laccaria; Cyl inhibeerib mõlemil, eriti Laccarial l

! vastu, Ultravioletti ja insektiitsiidide eest, aitab pindadele kinnituda, vs hüperosmootne šokk, vs kõrge temp; . Seentel rakuseinte küljes, apressooriumis tekitab

pole teada. Arv paljud *Russula* liigid on peremehe-spets;

x

Scleroderma sinnamariensega inokul soodustab *Gnetum gnemon* taimed

rus: ülevaade

a konkureerides. Eri taimede risosfääris eri pH ning DCA põhjal eri mikroobide kooslused  
amisega Ameerikas

ullas; bakterid sügavamal mükorisosf mullas efektiivsemad kui poindmises mullas

paarumistestid



liikus 2.6% taime fix 14CO2st. Taimest liikus C palju rohkem kui vastupidi

taalsed seenepaksendid, millel lühike eluiga

household bleach, 15 sek\_70%rtanool, 15 sek

ettevaatlik olema, sest mõjureid on v palju

ettevaatlik olema, sest mõjureid on v palju

kuna pärisb levimist ja konkurentsi

a kauem oli nisu enne olnud, seda patogeensemad olid sealsed seened nisule. Pms kottseened: Phialophora cf gregata ja Gaumannomyces graminis, kandseentel

Rhizopogon: istandikes äsjaistutatud puudele Rhizopogoni spooride ii

AM vs ECM

rapp võib tulla: Rhizoctonia solani-Thanaatephorus AG3 eristab tubaka-ja kartuli tüved omaette rühmadesse. AG sees on somaatilise mitesobivuse rühmad,

ECM seened vs Heterobasidion: Paxillus suurim inhibeerija

evikut

itudeta siiani isoleerida;

lof Styliidiumil, EcM polnud

Armillaria vs Hypholoma: antagonismikatsed

ECM seened kasvavad paremini 3% agarsöötmel kui vedelsöötmel

Petri tassis vedel MMN

VAM vs ECM  
: riski tõttu

kõrgus vs MR eosed  
Scleroderma spp: männi ja eukalüpti kolonis eri liikidel ja sama liigi isolaatidel erinev

le ja bakterite kooslused nõrgalt seotud; võrgustikud faagide, bakterite ja protistide vahel.

ga, sh P. Minoril sageli tugev mantel; Monotropa mükoriisa, Arctostaphylose arbutoidse mükoriisa kirjeldus; Calluna ja Erica carnea erikoidne mükoriisa. Pyrol

Cenococcum vs teised CWDs

CWD: ECM vs NON\_ECM

Endogone ECM parandab taimekasvu

Laccaria laccata, Hebeloma crustulinif, Rhizopogon rubescens parandavad taime kas  
Tuber sp. Endogone flammicorona, Rhizopogon sp: süntees. Rhizopogon kiirendab n

Pyrola ja Chimaphila populatsioonid on vähe divergeerunud. Paiguti väga suured kloonid

ju liike, eriti kandseened. Peaaegu kõik maaiseste viljakhadega; Zelleromycese eose orn Eostega potoroositas: palju liike, eriti kandseened. Peaaegu kõik ma

stumused, liigiteke.

erinevalt töödeldud pinnasel

↓-väetada. P-vaese mulla N-väetamine suurendab mükoriisa mõju, sest taimed allokeerivad rohkem maa alla.  
stamine; jääkade v valedel läviväärtuste kasutamine; barcoding gap vale interpretatsioon - on lokaalne gap ja nn. globaalne gap üle kõigi t

N, biomass: mitsetellofaanil

pöögilehtedel mikrokosmis + perliit

x

ECM vs saprotroof lehekõdul, N, P sisaldus, respiratsioon

1 tammel (sünt eostega). EcM eristamatu

Tuber himalayense, T. Indicum tammel (sünt eostega). EcM eristamatu

tospermum mood EcM siis kui on Männi või Nothofaguse lähedal, muidu mood AM.

lehtede lagunemine

ral muutuda. Vb hoopis eraldusmeetodi efekt?

vaid pikkjuurtele

veestress: juurte kasv peatus peale uputamist ja paljud juured surid, eriti kuusel. O2 p  
mänd adapteerus aeglasele uputamisminekule paremini kui kuusk. Männil tekkisid juu  
veestress jämejuurtel: nii kuusk kui mänd toodavad "lenti-rakke". Kuusekasv pidurdu

1 jt, plitseenis Brassicaceae, Ranunculaceae, eirti Cenopodiaceae. Eucalyptus oli eotseenis levinud ka Lõuna-Am-s; Eukalüpti puhul lükatakse ümber Ladiges et al 2

netsas; koosluste vahe rohumaa del ja metsas on suurim liivasel pinnasel. Mida suurem on MAT, seda väiksemad erinevused on rohumaa

uurendab P kättesaamist eriti laigu-töötuses

ei saa NM taim üldse. Vahet pole, kas N ja P on kontsentreeritud laiguna või ühtlaselt

indlasti ErM liigi 2 isendit leiti mõlema taime juurtest

Suillus variegatus, genete Cs sisaldus ei erine

Suillus antagonism

Suillus variegi somatic incompatibility genete eristamiseks

x

x

Morchella sp mütsseeli/vee segu

N-seotud ensüümide aktiivsuse mõõtmine vs lupjamine

la dankaliensis (Gymnoascaceae) mood Vacciniumil ErM. Kõigil esines tugev tsellulolüütiline aktiivsus

Cantharellus sp.

Cantharellus spets kasvukambris, vajab lisaglükooosi

Sphaerosporella, Laccaria, Pisolithus mood eCM pigem toitainetevaeses tingimuses,

x

seente suksessioon eelinokuleeritud vs kaevanduspinnasele ümber istutatud: inokulandid hääbuvad 3a jooksul ja kohalikud seened votavad üle :

aea, Sphaerosporella või Humariaga, arv EEMR mood mitmed lähedased liigid ja mükoriisat üldse palju rohkem liike kui leitud

ECM suksessioon konteinerites 4 a jooksul

viljakehast ja ECMst eraldatud kultuuride võrdlus, ECM moodustami

parim jäätmemuda;

robiohi vs AM

füütsus evol küllalt uus nähtus

inokul Tuboriga stimul kõiki taimekasvuparam. 4.5 ja 10 a

n vs n+n: ECMs vaid dikarüoot: n sureb või redikarütiseerib eelmise; Petrikal

liigid Euroopast

ülevaade

lõmusA 67% kloonidest

l tegelesid vastureaktsiooniga ning epidermise rakud kollapseeusid. Sama Pisolithus ja Scleroderma sobivad Allocasuarina ja Eucalyptusega, ent ei mood HN n

Eukalüptid Hiinas: Pisolithuse püsimine (moned pysivad, teisi pole tuvastat Eukalüptid Hiinas: Pisolithuse püsimine (moned pysivad, teisi pole tu

ud oluliselt kiirenenud evol gapdh kodeerivas osas

C-tõmbele läbi lehtede

Armillaria 2 sp

on benomüülil oluline roll suuremas taimede produktsioonis; mõnede taimede arvukus muutus seoses benomüüli lisamisega (stat mitteoluline)

AM vs ECM (antagonistlik v.a. Heb .

biomass, kõrgu eri arengulooga L.b. S238 osad vs ECM võime ja taimekasv

EcM seente suurem BD suurendab Acacia mangiumi kasvu ja nodulatsio

N, P kõrgem tammel kui on ECM vs AM

Tomentella sp inokul püsib ja suureneb ka mittesteriilsetes pottides. Vrd kontr paranc 4 ECM Seenega inokuleerimine eraldi 6 puuliigile. Inokuleerimise efekt parem, mida

Tomentella sp kolonis Afzeliat kiiremini kui Scleroderma. S Tomentella suurendab Afzelia kasvu, koinokul Scleroderмага tulemust ei paranda, ei

N saastudes taime N konts tõuseb, P sisaldus väheneb, kasv samuti väheneb, ECM m

n põhjust ka multikollin. Kui algmuutujad võtavad arvesse suurema osa variatsioonist nii et spat autokorr on mitteoluline, siis pole vaja s

Tuber melanosporum soodust 2 tamme liigi kasvu, ellujäämist, N, P omastamist ning

ECM kolonisatsioon, lühijuurte osakaal ja koigi ainete sisaldus suurem korgematel te

saprotroofid substraadi pärast

Rhizopogoniga suurem fotosüntees ja ohulohede juhtivus, madalam leheturgor; hebel  
Rhizopogoniga suurem fotosüntees, hebelomaga korgem lehe osmotne potentsiaal+vä  
Rhiz stimul taim fotosünteesi. Heb ja Rhiz suurendasid lehe osm pot. Teatud ajal pä

smikrosat-probedega>duplekside erald>kloneerimine>sekv

ülevaade

irem kui agaril tõen akt transp tõttu fronti. Looduses 90 cm a-1; vrd teiste ringjate saproobidega ruderaalne, sest jääb neile antagonismikatsetes alla ja looduses

loogias (vs Carpenter, 1996)

varjutamine ja girdling mõj erinevalt suhkruete rohkusele lehtedes ja juurt

Paxillus vs Fusarium: oksalaadi tähtis roll

ja AM valistavad teineteist

Petri tass: Suillus grevillei + 11 peremeest, ilma C

ck (25%) mudelid seletasid AM-seente liigirikuskõveraid parimini;

1 selle põhjal pH mõj AM-seenekooslusi palju enam kui taimeliik. Levimine piirab seni väga vähe

thii, Scleroderma polyrhizum, Tuber borchii, Xerocomus badius: esmane idandamine ja EcM süntees eostest männil tavalises PVC konteineris

Leccinum suur: eoste massiga vees

ts, kogu liigirikkus, võrdlus

olori EcM mood ja puude kasvu; Hebeloma ja unidentl EcM mood pärssis

50% etanooli 20°C; fikseerimine  
säilitamine

imeste vahel ja mukoosa ning .. Vahel; uued klaadid. Kõikvõimalikud programmid BD võrdlemiseks: rarefaction, ekstrapoleerimine, S-Libshuff, DPCoA. Sekv

pikkus kvantit näitaja. CA

aine

taimedes: N rohkem noiarongi joonel; P väljas>sees>joonel

1...5a taimed; vs ECM vs AM vs mõlemad; biomass, N,P-sisaldus

ured geneti: ECM sümbioos kui vastastikune parasitism ja ekspluateerimine: sõltuvus keskkonnast, ekspluatatsiooni def Bronstein2001 jr; stabiliseerivad meh  
:ta biotroofid (Anthracobia maurilabra, macrocystis; Trichophaea hemisphaerioides), paljud pole yldse biotroofid (Anthracobia macrocystis, Ascobolus carbona  
chophaea abundans ja Anthracobia spp inh juure kasvu sporaadiliselt. Sph Pezizales vs seemnete idanevus ja idandite ellujäämus vesiagaril: Seemnete idanevus

Pinnasetüüp mõj enim ülemist ja kõige alumist horisonti.

.Mis kasutatud!!

vs pH, N sisaldus

kuusk ja kask www: 13C netotransport vaid 2%, sellestki pool juurtesse; kui algul an  
N sisaldus, juurte hingamine

Alnus vs Pinus; vs Frankia; vs K, N, P



ISSR ektomükoriisadele, SCAR marker ühele Suillus collinitus indiviidile. Suilluse genetid püsivad 1.5 a peale inokuleerimist

rus, sellest tingitud vead

pH mõju: biom eri pH

Piloderma vs Paxillus & pink: konkurents asustuse pärast

seen oli võimeline sümbioosis kasvama sell.

teatud pH väärtustel ründavad mullast Cenococcum ja Tomentellopsis

Tomentellopsis, Piloderma ja Paxillus on võimelised kasvama läbi mi

vaid pisut; enamus tüvesid käib kaasas kogu elu; sugulastel sarnasemid bakterid kui mittesugulastel; dieedil olevatel paksudel sarnasus ka

Tuber maculatum esmane süntees Pinus strobusega. Eriti vermikuliidilise

astamine metaanalüüsi ja C-lisamise katsete põhjal

. Lokaalselt mõjutab kooslust ja liigirikkust enim pH (unimodaalne Ph7 juures)  
inukitel. Tax elurikkus ja funktsionaalsete geenide rikkus korreleeruvad;

u skaala erinevustele nii ruumiliselt kui fülogeneetiliselt

muud asjaolud

rolli, määrab pH

iheneb 2x, algloomadel rohkem; aktinomütsetidel tõuseb 3x; bakteritel +-sama, sügavamal suureneb varieeruvus. Haruldased PLFA piigid on sügavamalt ka

RA + sekv. Kuuse risosfääri bakterid ja seened on erinevad haigete istikute juurtel vrd tervetega

hüüfid vs ECM vs taimeosad: eri aminohapete sisaldus sõltuvalt seensümbiondist: kü

lehis vs mänd: Suillus spp. 32P ja 14C ülekanne. Mänd kui juhuperemees kaotab palju  
incompatibilne ECM annab 2-4 korda vähem C ja 50 korda vähem P

Laccaria (väikesed) vs Xerocomus (suured)

early vs late stage: vs mulla juurkontaktide läbilõikamine. Isoleerimata kase seemikutel Lact pubescens, L. glycosmus, Leccinum sagedasem; isole

networking: modulaarsus ja nestedness sõltuvad assotsiatsiooni intensiivsusest, mitte parv mutualimusest; eri networkide sidumine; mu

oascaceae

ECM inokuleerimine et kasvaks mets või söögiseened: vilets ülevaade

inokuleerimismeetodid: ülevaade. Kinnistel katsetel CO2 probleem. K  
kasvatasku meetod: taim paberil, kilekotti, 2 polüester plaadi vahele

suurendavad ECM% akaatsial **Bacillus 2 spp:** parandavad Pisolithuse kasvu, ergosterooli hulka; suurendavad ECM%  
Lact pubescens ei levi eostega noortele taimedele; Inocybe, Laccaria ja Hebeloma kolonis eostega noori taimi holpsasti; eosed idanesid ka sama hasti mullas, mi

**kultuuride säilitamine -10°C juures pos** **kultuuride säilitamine -10**

; Pyrola leiti NM

arengut. Leidis EcM eriti hästi arenenuna lubjarikkal pinnasel; materdab Gibelli ja Hartigi eelnevaid töid; oletab, et EcM mood mitmed eri seened;

**Mycena galo Mycena galopus vs Marasmius androsaceus**

**kase ja vahtra seemikud 25 erimullal: molemad liigid tugevas korrelatsioonis**

ne; fülogeneesirekonstr robustsus

ja bulk mulla **Pseudomonas fluorescens: genotüübid** mükoriisas, mükorisofääris ja bulk **Pseudomonas fluorescens: genotüübid** mükoriisas, mükorisofääris ja  
metasaistanduses: doosiefekt, MHB, mütseeli segamine istanduse mull  
tsiifilisus võib esineda nii seeneliikide vahel kui liigisiseseelt; võivad hõlbustada ka patogeenide sissetungi samad seened. Kasud: idanemine, müc kasv, mulla k

**Hebeloma: eoste odandamine: juured**  
**haploidne ja diploidne mütseel (Suillus luteus, S. Granulatus, Sclerod**  
**spooride idandamine: puustisi, Rhodotorula sp**

**Suillus luteus Paxillus, Pisolithus, Thelephora ei** tekita antagonismijooni, mis võib olla söötme viga

imene tegemine: MacroLepiota procera, Agaricus sylvaticus, Amanitopsis plumbea, Russula alutacea, Laccaria bicolor, Sarcodon imbric  
ine vs aluseline põhjakivim

Laccaria inokul taimedel ei arenenud teisi mükoriisaid, ent Hebelomaga asustatud arenes. Hebeloma kolonis ka palju madalam

iprodiioon vähendab taimede kasvu primaarsuktsessioonilises aimekoosluses

porium sp, Geopyxis sp (Helot) (kolonis seementel 1-2%)

Paxillus peab 8a vastu, Hebeloma ja thelephora <2a tamme Paxillus stimul tamme kasvu eriti poustel suvedel  
seerivad teisi seeni

juured >80 cm, eriti tüve suunas; homokaartioidid ei kaota ristumisvõimet peale pikka seiamist

vs inokuleeritud vs aktiivmuda jäägid vs metsamullaga inokuleeritud

säilitamine

reede juurtes puudest 20 m eemal.

u eosekesta

99-100% barcoding threshold

lli AM ja ECM eelistuses.

herbivoorid vähendavad AM ja ektomükoriisa kolonisatsiooni; AM ja ECM vähenda

svanud *Nardus stricta*

*Laccaria amethystina*: väikesed genetiidid

Heterobasidion vs *Trichoderma*-olulised

Heterobasidion asustab märksa enam supresseeritud puid

mass earlystage vs latestage: toitainete vajadus

xxx

*T. matsutake* filterpaberi vahel, niisutatud NFEA

ult enne külvi

Tuberid parandavad tsistuste kasvu

maasikapuu: ArbM struktuurid ECM seentega, AM ja Hymenoschyphus paiguti tungi

Monocillium

sed olid erinevad; 13C ja 15N signaal üheskoos viitavad osalisele mükohet-le *Orchis purpurea*l.

üs. Polnud olulisi erinevusi aastaajati ega eri pestitsiidide kasutamisega

NO<sub>3</sub>-imemine-mikroelektroodid

*Hebeloma conica*, *Gyromitra*, *Lycoperdon*, *Mutinus*, *Dictyophora*, jpt muude pil *Hebeloma*, *Cort*, *Tricholoma*, *Scleroderma*, *Pisot*, *Pax*, *Laccaria*, *Amanita*, *Leccinum*,

ökoloogilised seosed liikide vahel on evolutsiooniliselt konserveerunud. Viirustel>bakterid>eukarioidid; sümbiontidel, ekspalt; Ei võtnud arvesse ruumilist autokoorti;

alju sekventsigruppe, *Thanatephorus*el vastasid AG-dele. Grupisene ITS <2% var. LSU analüüs lükkas ümber AG kui evol ühiku kasutamise

*Lactarius delic*: *Lactarius deliciosus*, *L. Sanguifluus*, *Pisolithus*, *Rhizopogon*, *Suillus* s

<120 päeva +2C

xxx mass, [C:N] xxx

phala. ARISA fragmentide rohkus kõrgemal vähenes, et NS

Salix herbacea

staimedega. Endemism; funktsioonid

viljakehadest tükkide eraldamine ja ECM süntes

SH + mikroautoradiograafia, 13C-PCR, 13C-PLFA, Br-deoksüU jt

itelised taimest seende transportima 13C ja seenest Vacciniumisse 15N. EcM-isolaat suurendas ainsana taime 13C fikseerimist iumi juurtest; M. Bicolor leiti vaid männilt (n=2). Geneetid on väga tihedalt ja arv nad on väikesed. Geneetiline distant ei korrel füüs dis 4 ja Gln; efektiivsus sõltub kasvukiirusest substraadil

kasvatasku meetod

a, Panaeolus, Mycena, Entoloma). Hygrocybe pole kultiveeritav. Hygrocybe eelistab kasvada samblaga.

juhuslik kolonisatsioon

Suillus granulatus>P. Tinctorius=Cenoc=kontr

krüpt liike arv metsade istutamise tõttu. Acephala applanata basaalne, eelistab kuuske mustikale obed ei andnud tulemusi teistel Phialocephala liikidel . aga liigivah mitte. ITS oli vahetegemisel vilets, muud regioonid andsid tihesuguse hea tulemuse

Zijlstra 2005 isolaadid ei kuulu sinna rühma; ekslikult peetakse EcM taksoniteks; kritiseerivad töid, kus täheldatakse DSE pos mõju tain

DSE: Phialophora finlandia, suurimad genetid vähemalt 3\*3 m; eri genetid omavahel tugevasti läbiseigi, samast proovist max 5 eri genetit

Tricholoma populinum ja Tr. Scalpturatum haava istandikes Prantsusmaal. Iga-aastase ülejutusega aladel v palju väikeseid ja geneet v sarnaseid geneeteid; häir Hebeloma: väikesed mobiilsed genetid, ulatuslik inbreeding

Lactarius deliciosus männil: kasv kiirem inokuleeritud seenega; sõltub mullast; ECM

biomass Lactarius deliciosus, tingimused

Tricholoma matsutake stimul Pinus densifolia kasvu

matsutake: P/V, SH sööde glükoosita, kiire ECM teke  
Tweeni või mineraaloli lisamine -aeglustas kasvu, suurendas ergoster

Hebeloma cylindrosporum: ECM vs viljakehad: sarnane, ent ECMst väga vilets PCR

Daldinia loculata: eripuudel erisendid, samal puul enamasti sama isend. 3 geeni sekveneerimine ja alleelid. Paariline enamasti koniid ja väga lähedalt

juurtega inokul ebatsuuga istikud: lepp ja Calamagrostis -minimaalne,  
6 kuud 3°C, metsas juurte  
biomass: raiesmikul suurem hoolimata väikesest ECM hulgast ja BDst

vihmaussid parandavad kase kasvu ja lehtede [N] mesokosmoses

Tuber, Boletus edulis, Tricholoma matsutake: kultiveerimine, VIITEI

#### ECM vs Otiorhynchus (Coleoptera)

õosed levivad eostevihm monokartüotidele: õosed levivad väga kaugele, ent elamistingimused ei loba eksootilistel liikidel kanda kinnitada

.osc. Ericae = erikoid MR; M. Vraolstadii = EcM; Cadophora finlandia = EcM, M. Bicolorata = Piceirhiza bicolorata (EcM), tüüp M. Variabilis = endofüüt pal

10% bakterite kooslusest

palju *P. Fortinii* kuid ei ühtki *P. dimorphospora* isolaati

biomass agaritükkidega

horisondist ja vs. Metsa maha võtmine; Üld-euk praimeritega tuli 93% seemed: palju kimääre

eri istutusmeetodid. Neg mõjutab rohtude hulk. Mändi ja ebatsuugat mõj eri istutusvi  
istandusest

ECM stimuleer Petri tassil agarsubstraadil

chrysent, *Russula fragilis*, *puellaris*. ILLUSTR

s ka Tulasnella, mida tuvastati SEM järgi



Pisolithus vahendab N liikumist Casuarina ja Eucalyptuse vahel. Mõl taime biomass j

l hävivad kiiresti

olonisatsioon

idiosünkraatiline, erinev 5 riigis, erinev 3 a jooksul, erinev töötlustes, ent kõikjal +-efektid. Arv. Tulenes täpsest maakasutusest enne. Umbrohte eelnevalt ei h

ja kasvu, MHB mitte (arv sest inokul peale ECM inokul). MHB kadus rist Laccaria bicolor Laccaria bicolor + Pseudomonas fl. Laccaria inokul stimuleerib kasvu

mass jt

EcM kolonis Cenococcumiga korrel taime kasvu ja P omastamisega

lepp vs haab: h lepp vs haab: haaval suurem liikide arv ja ü.

astmetes valgemaädaniku korral

eenemad

xxx

suur ristumispaik

id

ärgi.

. Eukalüptide esiletõus algas ü hiljuti seoses põlengute sagenemisega

taimed pms hapestavad mulda ATPaasidega, selleks et saada kätte P, Fe. Reaktsioon

**Suillus pictus**: suured genetid; mükoriisana võib olla suur ja toota vähe viljakehi ja vastupidi. Suures skaalas genitite paiknemine läbiseigi, ent mitte samadel ju

**Suillus ja Thelephora** mõjutavad erinevalt d15N akumulereerumist taimesse vrd mitte

astu üldlevinud arvamusele, et AM seentele on parim nakatada max peremehi, et ära elada.

rohttaimed: konkurents N sisaldus väheneb, N omastamine suurem kui yhtlaselt jaotatud vrd üksikhunnikuga, AM-st polnud tolku

etes tingimustes ja kompleksse inokulumi korral. MR tüüp, see mükoriisa mõju on eriti tugev siis kui N/P suhe on kõrge (P limiteerib), s  
Pinus radiata populatsioonid: eri geogr genotüübid assots eri seenekooslusega

ECM seente biodiversiteeti võib ülal hoida juurte "teadlik": looduslikult kasvaval nulul korreleerus Cenococcumi rohkus valges taimede väiksem  
EcM seentel pole täheldatud indiviidi-põhist adapteerumist

a SordarioM eri rühmad. Mõni Pezizalese liik. Kultuuridest sekv  
tskond, pole tõendeid koevolutsioonist; seente jaoks fakultat.

/eereziimi. N reostus ja puude koorimine vähendab seentesse minevat C, ent ei mõj bakterite arvukust üldse. pH tõus iseenesest suurendab bakterite osakaalu. S

viljakehade ja puude 13C sisaldus

Phellinus tremulae: puu kohta keskm.

inokulumi suurus on tähtsal kohal antagonismi uurides

saprotroofidel suksessiooniline rida: hilisemad on agressiivsemad; eri inokulumi suurus

ECM ja VK ECM ja VK Paxillus erinevad isolaadid inokuleeritud tammedel ja pöökidel ECM ja VK Paxillus erinevad isolaadid inokuleeritud tammedel ja pö

kasvatasku, membraaninokuleerimine

se str., Ei uurinud OTU läheduse kui artefakti efekti. Juurekooslus oli nested osake mullakooslusest

i juhuslik; mõnedes kohtades ka erinevad = üledispersioon (eriti toitainerikkamates paikades). Habitat filtering tähtsam kui konkurents koosluse str seisukoh

1cm ---300m skaalas. Baktereid tuleb alla kasvades vähe juurde, taimi rohkem kui loomi jms. Bakterikooslus sarnasem keem sarn aladel, taimeliigid baktereid ei  
i opt-trendid, MITTE\_OLULINE!

ne assots oluline pea alati. Fingerprinting ülehindab ja puudulik proovivõtt ning taksonoomia alahindavad mustrit

ne keskkond 1mm<sup>3</sup> skaalas; tähtis primaarprod -küürukõver; liigisiselt on biogeogr str, v suur erinevus levimisvõimes; kiire evol-võime nii mutatsioonide, ko

mida väiksem on mittekolonis juurte osakaal, seda vähem on ka Rhizopogo mida väiksem on mittekolonis juurte osakaal, seda vähem on ka Rhizo  
Lact deliciosus: peamine istandustes site effect, seejärel isolaadi ja algse kolonisats efektid

Laccaria amethystina: EcM ja VK vahel suured erinevused, aastaegade ja aastate vahel vähe kattuvust. Ühel juurefragmendil sageli mit

monia ox) - Z-väärtus muutub geograafilises skaalas. Koosluses peamine tegur niiskus%

Laccaria vs Thelephora avamaal

kõrgus, juure, r konteineris, avamaal: erinev doos (1:100 optimaalne)

Pyrola rotundifolia: varjus vs valguses kasvamine ei mõjuta taime kasvu; kasv väga a

imide aktiivsus nagu EcM seenel. Hebeloma ja Laccaria ureaasi aktiivsus. Ntx Lactarius rufusel v tugev liigisisene varieeruvus

iemine)

rtant phytopathogenic genera. Fung. Div. 67: 21-125.

htades ja stepis, ent mitte kuivades kohtades; Serendip - soodes ja stepis, aga mitte päris veesega kuival

um sarapuul

Tuber albidum Tuber albidum ja Tuber aestivum eostega sarapuul  
Shorea parviflora seemikud metsas vs raiealal (parem kasv valgustingimuste tõttu, EC

ccaria) ja Hebeloma eosed idanevad kergesti Salixi juurtel; Russula ja Cortinarius ja Inocybe dulcamara mitte. Idanemine hea ka 1 kuu m  
jutas tugevasti metsatüüp. 2 liiki Serendipitat olid tugevasti ühte liiki eelistavad. TRFLP

atsed, vaatluskatsed: levik, kestvus, liikide & gener arv jms stat

liigi eoste idanemist; ka glukoroonhape ja n-butüraat, aga mitte teised sarnased Tricholor T. Robustum indutseerib sama liigi eoste idanemist; ka glukoroonhap  
des, mis korjatud lagupuidu alt

si Tomentellopsis submillis mükoriisades ei sõltu seeneliigist ega metsa produktiivsusest. Domin Burkholderia, Pseudomonas

sele üsna vastupidavad, arv Rhiz olivaceotinctus on er kohastunud ruderaalse eluviisiga. Võib-olla mõjutab suurem hüdrofoobsuse teke eri seente konkurents h

Suillus granulatus: RAPD eristab paremini kui SI

nud  
ga toitainetevaestel ja põuariskiga aladel  
ants (jagatud seeneliigid) olid omavah pos seotud

männi ja kuuse järelkasv kannatab tugevasti mustika juurkonkurents all

lidel parasit seeni

d hüüfid võimaldavad efektiivsemalt toitaineid transada ja stimul signalisatsiooni

kariotooses mytseelis, homokarioidis alati identne, kuigi 150 koopiat. Kontsert-evol. IGS palju informatiivsem kui allosüümid

esring, teistel ja 'hybriidil' kitsas. T cingul ja T inocyebeoides on arv tek 10k a jooksul

em Carex flacca monokultuuris ja paljal mullal kui Festuca rubra ja 12 taime segakultuuri puhul. Arv. Tegu AM-seente negatiivse mõjuga enamusele bakteritele

s, kus 3a polnud taimi kasvanud > Carex flacca > 12 taimeliiki > Festuca > Plantago biomass suurem mõnede taimede kasvukoha all vrd teistega

liikidesisene ja liikidevah võitlus mullas eraldi.

onnale erinevalt. nirK geene mõj eriti mulla niiskus. Sarnased ökosüsteemid üldjuhul klasterdusid.

Thelephora oluline vähenemine 3 a jooksul inikulumi potentsiaal raiesmikult võetud mullaga: kask vs ebatsuuga: orrelatsioon P omastamisega) ECM vs AM. Nii ekto kui AM seened suurendasid taime kasvu, P sisaldust (ECM ro metsa istutatud ECM taimed surid. raiesmikul ja metsaserval kasvasid hästi ides taimsed toitainete omastamise protsessid asenduvad seene omadega Wilcoxina koloniseeritud kuuse seemikute 15N omastamine ja kasv on suurem kui A:

xxx

Varis mikrokosmoses: vs "huckleberry" vs tamme vs männi vs sega varis: taimekasv 8st koinokuleeritud liigist kasvab 3, kolonisatsiooni vähenemine 1,2,4,8 ECM liiki ei suurenda taime biomassi vrd üksikliigi efektiga; vahe eripinnasel

juure areng

l suurendavad koosluse funktsionaalset erinevust ja teise bakteriliigi kasvu inhibitsiooni ning kasvu kompleksel toiduallikal. Lihtsal toid

1. Arv et orhideedel toimub ECM seentele lülitumine rohelistel taimedel, hiljem tek mükohet ja kitsam spets et orhideedel toimub ECM seentele lülitumine rohelistel taimedel, hiljem tek mükohet ja kitsam spets

tud). N eff pole

pleegitatud 0.6% Na-hüpokloritiga

DSE kultuuridele: Phialocephala sama genet mitmetel eri peremeestel kuid mitte läbi 2 aasta: dominantsed ja haruldased genetid

saalsed taksonid on kimäärid, sest selles töös läjksid basaalsed kimäärideks  
a, seda suurem on levila (Rappoport!); paljud bakterite OTUd kattuvad lõuna- ja põhjaparasvöötmes

kõdupuidus. Min-muld siiski tähtis, sest massina on seda palju

girdl juba (mõju EmH-le kiire ja EcM ning juurtele mõjub pika viivitusega); EcM seente biomarker korrel tugevasti PheOx aktiivsusega

metaanalüüs: ka minimaalne EcM kolonis parandab taimekasvu. Efekt ei sõltu %kol

uteus kolonis, ent ei mood HN; Lyophyllum sp ja Chalciaporus piperatus ei kolonis üldse. Lepista spp.kollane mütseel

ab eoste suurust. Varem viljuvad liigid ja kuivemal ajal viljuvatel on suuremad eosed

aks Phellinus nigrolimitatus: populatsiooni struktuur: ühtsed popid, pole heterote defitsiiti; raske eristada eri populatsioone -arv jääaja rekolonis artefa

Trichaptum abietinum: regionaalne ristviljastumine, lokaalne lai diversiteet: ühel tüvel v palju isendeid. ISSR. Geenid: RFLP

männioksale, mille juurdumine indutseeriti 0.05% Na-5kloro-3indooli

taksonoomia seletab 26% Bakt koosluse var, f-n tunnused 13% ja nende ühisosa 10%

hao1, Sace jt; VIITED

adel; mitmetel liikidel stat oluline erinevus rohumaal tüübist ning paiga efekt. Arv et kerged muutused mulla toitainetes mõj oluliselt taimekooslusi, ent ei mõjuta

konkurents EcM kooslustes ja katsetes: kas määrab taim v seen? Metoodika

Rhizopogon 2 liigi vaheline konkurents. Üks idaneb kiiremini ja surub teise maha võrreldes üksikinokulatsioonidega

konkurents EcM seentel sõltub keskkonnast, arv. Et tugevam konkurent on kasulik ka taimel

ente poolt, mis on enne kasvamas. Ent üks liik Rhizopogone ei suuda teisi inhibeerida

EcM mõju kasvule parem niiskes vs kuivas mullas

hkem

is kolonis, haustorite seedimine taimerakus; Monotropa -er paks mantel, rakusis kolonis; Rhododendron, Gaultheria, Cassiope -mantlita erikoidne MR. Kasvav: inomycetes

Helianthemum: Cenococcum: 5 pindsteriliz sklerootsiumi

AL:CA

diin induts Suillus bovinus eoste idanemist

le. Eukalüpt mõjutab risosf bakterite kooslust DGGE ja funktsionaalset mitmekesisust neg. AM seened potikatses vähendavad eukalüpti efekti teistele taimedel

sum ja Vacc vitis-idaeaal. Plot mängis suuremat rolli kui peremeestaim; Domin Helotiales, Serendipita, Chaetothyriales



al tehaks kindlask, kust proov võiks pärineda ja kas tegu võib olla reostusega

gutine ja HN väga nõrgalt arenenud ja intratsell kolonis ulatub endodermisesse  
paplil; Epichloe, Ophiostoma novo-ulmi, Saccharomyces, Phytophthora alni

% massikao järel, mistõttu arv, et seentel oluline ka CO2 pime-fikseerimine; autolüüsi faasis toimub glükoneogenees, mis kompens 13C väärtusi,

1. Kui juur sureb, siis EcM seen saab esimesena jaole ressursidele, EcM seente evol saproobidest ei toimunud kindlasti pika hüppega

ECM seentel pms vältivad interakts omavahel, pms dominantidel; vähem esineb positiivset koeksistentsi ??? Tanniini ja N lisamine muudab mitm

enim taimede funktsionaalsete gruppide olemasolu  
reaktsiooni taimedel

4

eraldamine

tlasi ka seentest

uuselonide vahel sama ja kooslus kah. Endof muutuvad saproobideks ja lagundasid ise 1/3 kuni 45% massist. Domin mfg Helotiales, ka  
%koloniseeritud; väheneb suurlinna läheduses, korreleerub okkakahjustustega

orava sitaga: Rhizopogon, Tuber, Sclerogaster -sama hea mükoriisa n

süsinikpaberil Petri tassis

alselt, ent täpsed järjestused mitte grupisiseselt liikidel kattuvad!; orhideedel ja kanarbikulistel Sebacinales liigid ei kattu!, ent grupi-sees küll; puudel AM-seen

eril, vahest areneb normaalne ECM

lodermisses, põhj tugevat taime vastureakts; mõju taimekasvule polnud; Termin: Terfezioidne assotsiatsioon

kul vs kontr

liigirikama ECM kooslusega istikud metsast on väiksema juurdekasvuga kui madala tsuuga ja kuuse noortaimed (5a) peale ymberistutamist ja eri juurekontakti režiimi. 1

kaheks jaotatud juuresüsteem: vs väetamine

Rhizopogon 2 spp geneti ECM järgi: SCAR praimerid GCG ja CAC kordustele. Vaja 5 markerit geneti tuvastamiseks. Maksimaalne geneti läbimõõt 13.5 n

jr, eriti streptokokke (arv PCR artefakt, mistõttu lõigati streptokoki-restriktasiga DNA katki IRW). Paljud bakterid ei kasvanud kultuuris

Laccaria sp: monokaartionid vs dikaartionid .

x

CWD-le

õtasid diskreetsetel juhtudel hästi, ent gradientide puhul kehvasti; Kvalit puhuks oli vaja palju rohkem andmeid. PCoA ja NMS sarnase e

alginaadi ja hüdrogel kerakesed -ei vigasta seent, kontrollitud tingimu

okaste eemaldamine looduslikul männil vähendas pealsete juurdekasvu järgneval aast

valgusallika tugevus mõjutab kahe seeneliigi proportsionaalset osakaalu ja juurte koguarvu nülul. Cenoc talub hästi varju ja v  
-spets alarühmaks; Agde vaheline hmoloogia <96%; AG4-sse kuuluvad ka hüpovirulentsed isolaadid, mis fülogeneetiliselt on sarnased 2-tuumaliste Ceratobasic

s edulis risosfääris vs bulk soil; normaal vs vulkaanilisel pinnasel, vanadel vs noortel puudel, närimata kui näritud puudel. Pseudomonas fluorescens sama, ent k

Clitocybe, Lepista: nitrifikatsioon suureneb

id genetiid inkorpor endisse haploidseid eoseid et sailitada potentsiaali

i

ga; laialt levinud v paljudes Ameerika istandustes, v vahe leitud metsast Wilcoxina v tugev pos moju taimekasvule eriti ECM mood puudele vrd EeMR puude deraal. Kolonis. Kaevatud maad, polenud alasid, metsataimlaid, vaetamine stimul., vois v Paxillus involutus: tuupiline ruderaal. Kolonis. Kaevatud maad, polen

i klamudosp inokul mittesteril tingimustes EcM%le; mida rohkem eoseid (10e9) seda pare eostega inokul palju ef-sem kui klamudosp inokul mittesteril tingimus i klamudosp inokul mittesteril tingimustes (poolsteriilselt klamudosp pare eostega inokul eostega inokul palju ef-sem kui klamudosp inokul mittesteril tingimus osed=oiidid>klamudosp (arv Helotiales spp)>>huifid

Pisolithus sp tuhest viljakehast saadud er monokaartionide ristamisel saadud dikaartio  
Pisolithus sp tuhest viljakehast saadud er monokaartionide ristamisel saadud dikaartio  
Pisolithus: mor .

ns Mesophellia, Zelleromycese ja Labyrinthomycese eoseid. Eosed idanevad ja mood EcM vaid siis kui rott on need ara soonud. Arv. Et rott on v efektiivne eo:

aialt levinud. VIITED.

imelised min-aineid seente vahendusel paremini katte saama kui AM taimed; hupotees: ECM seened lagundavad esimesena peremehe surnud juuri

Populus tremula: optimaalse nakatamise leidmine seemikut

ECM, AM stimuleerivad

koidne kui ei midagi

1. Täielik liiginimekiri: paju???

is ECM vs saprotroof mikrokosmoses: hüpoklorit

Petri tassis turvas+vermikuliit

ja Rhizopogon.

Armillaria sp konkurents: Armillaria spp. Eri paigus

teeriv

1 seent; kontrollpool vs AM-pool. 14C söötmine. AM-seentel liigispets voime suurendada taimekasvu. Tugev korrelatsioon AM kolonisatsiooni ja 14C saamise

terveid DNA ahelaid, mis lagundatakse monomeerideks või väiksemateks juppideks ja seejärel tehakse oma RNA ja DNAd

ECM perioodumid (mullas ja sees palju vähem)

:

a. Eri taimeliikidel tipp-ja madalhetked eri kuudel. Arbuskulite, vesiikulite ja hüüfide arvukus kõikus samuti iseseisvalt eri liikidel

**Tricholoma** matsutake VK vs EcM ISSR: 12 geneti esines 3 a jooksul 38st. Nõiarigid koosnesid 1 -4 genetest. 1 geneti mood mitu ringi üksteisest 11,5 m eem

zaceae Makaroneesias

es maksasammalde ja pärissammalde perekondades

**Cenococcum: ei mood ECM 2 pajuga, lepaga ja kadakaga**

: isoleeriti juurtest mitmeid seeni, sh MRA1, pannaldegas kandseen, MRA2, MRA3. Seemned ei idanenud hästi ei humuskihi all metsas ega eri laborisootmetel

**Tomentella sublilacina vs Rhizopogon**

sp eoste idanemisel: Rhizopogon idanes kiiremini ja alustas kiiremini kolonias, ent mõne aja pärast hakkas l paljute mullaselgrootute seedetraktis ja kitiinkestel. Võimalik levimiskaugus. Eosed vitaalsed peale esimest seedekulga läbimist, peale predaatorite poolt söön

**ECM seente 13C korreleerub seente N-ühendite kasutusega. Mida mi**

**T. Sublilacina, Rhizopogon: spooridest 2milj**

zomycetes

**Suillus variegatus vs Hypholoma fasciculare; inokulumi efekt**

**Suillus variegatus vs Hypholoma fasciculare; inokulumi efekt**

**ECM vs sapro** x

**ECM vs sapro toitainete liikumine ja aineriingi ülevaade, diskuss**

**ECM vs SAPRO antagonism**

**mullaseened; vs girdling, SWE: ECM seened asenduvad Helotialestega, samas bakterite hõimk tasemel rühmad samad**

stus kas *Alnus rubra* v *A viridis* suhtes

te osa v vilets)

d valepositiivsed RNA-DNA dupleks paardumise omapärade tõttu

Phialophora inokul mänd säilitas peale rauakaevandusele ist Complexipes, Phialophora inokul männil suurem väiksem kui Suillus, Pisolithus < k

AM vs ECM papil, pajul, eri kk-tingimused, taime vanus, juure eri piirkonnad  
ka äärmusi. Eksperimentaalselt mõl eelistasid parasniisket. Arv EcM tõrjub AM välja sobivates tingimustes

ruldaste liikide rühmit

kooslused erinevad peremeestaimeti ja koosluseti ning sõltuvad, kas taim on mono või polükultuuris

varieeruda palju kordi sama probega

logen-BD madal. Vaja rohkem metaandmeid sellisteks analüüsideks

t plajud EcM seemned stimuleerivad eukalüpti massi 90-225% kontrolliga vrd. Kasvu ei stimuleeri.

llas ja juurtes; BD madalam

Laccaria monokartüooidid on mõned võimelised mood ECM ebatsug

tammetõrud Laccaria>Hebeloma>Cortinarius anomalus; orgaanika lisamine suurendab

cter-grupp, aktinobakterid  
d pigem setete anaeroobsetele bakteritele, suurem BD kui pinnapool

max kasv istutatutel

M-liigid fülogen klasterdunud  
omeraceae ja Gigasporaceae komplem mõjudega

taimekasv palju kole kiire: vt Finlay et al., 1988

külmutus, gene-clean

2 Piloderma vaheline konkurents erinevate N ja tuhasuse as taimekasv parim kui rohkem N ja tuhka

juurtel

cistaceae: Fumana, Tuberaria Ameerikas ECM-taimed

e mükoriisa läbi AUS taimedel. Kuna esialgu uued sümbiondid peaksid käituma ebaefektiivselt, siis on tugev valik nende vastu. Uued se

Tuber vs Festuca mulla aurutamine: efek vs mulla auruta spoorinokulatsioon 10\*6/ml Tuber

Tuber melanosporum vs T. brumale (parem kuivemas)

tuberiga inokuleeritud tuberi pinnasel sarapuukloonidega: tuber vs muud. Noortel juurtel domineerib Scleroderma, Tuber vanematel

; gradienttsentrifugimine. 13C DNAs 2x, rRNAs 10x vahe

kuuse eriliigi hübriidid on väiksema fotosünteesivoimega kui mõlemad vanemliigid

Atlandi silla Am-sse, kus divergeerus ja hiljem levis üle Beringi silla tagasi.

Collybia fusipes: väikesed genetiid, mitu ühel puul; IGS1,2 vs SI: veic eritulemused  
liales, Pleosporales, Hypocreales. DGGE bändi taga võib olla 5 eri seeneliiki

põhjapool sademeid ebapiisavalt praegu ja ka jääajal. Jääaeg ei põhj nii suuri flukt kui Põhjapoolkeral.

kasvunõudluste tõttu

HgCl ja CuSO4 töötasid, muud mitte (H2O2 ja ClO4 ei proovitud)

saviga yhes tykis annab norm tulemuse vaid sisetingimustes, mitte kasvuhooes;

eostega inokul koos seemne ja saviga yhes tykis annab norm tulemuse  
eri kasvusubstraadid, söötmed, nõud, tingimused, seeneliigid; eri inok  
Thel: idandamine ei õnnestunud agaril koos juureekstrakti ja eraldatud  
Thelephora: spoorinokulatsioon. Kontaminatsioon inhibeerib, ELUSjt

d agaril koos juureekstrakti ja eraldatud juuretükidega; õnnestus potis eluspuu juurtel

ECM vs patogeeniid: liigisisene varieeruvus

mass  
mass

spoorinokulatsioon; tavaperemes vs juhuperemes vs tõrjumine  
metsamuld vs raiesmik vs istandus (kõige väiksem inokulumi potentsi



seme. Kuivades AUS piirk levinud puguseened . AUS endeemide hulk eri taksonites v erinev: pms Amanita, Torrendia, Cortinarius s.l., Laccaria; saproobid pm

EcM hüüfid, eriti Theleporoid sp

pH mõjutab

männid inokuleeritud eri seentega vs ilma omandavad eri kasvukohtades eri männid inokuleeritud eri seentega vs ilma omandavad eri kasvukohta

amata alal suurem BD, suurem liigirikkus, kollektorkõver järsem. Sarnasusindeksid proovidele. Proovide DNAde kokkupeksmine, et saada üle PCR nihkest (W ominantsus): vahet pole, sest vähe proove

ideede dünaamika sõltub seene dünaamikast, mis omakorda sõltub pude dünaamikast. Orhideed olid nakatunud Ceratobasidium-mädanil erija oli alati ka efektiivseim kasvu soodustaja; Pärast väga kuiva suve, loosusliku populstiooni genititel vaheldus Tulasnella liik. Labor

ers.

.4 m emapuust Dicymbel. Arv EcM eluviis mõj Dicymbet MD metsas paremini kui teisi puid

Corallorhiza; vs ECM seene ja peremeestaime olemasolu

ionte koos rohttaimedega Asteraceae, Araliaceae ja Rubiaceae hulgast

nic ja Mucor nii endofüüdid kui parasiidid sünteesides. MRA võib moodustada seenmantlit ja HN moodi moodustisi, aga steelis rakusis l

thiamiin, aminohapped ja B-vitamiinid ja Mä-juured stimul

stava pop jaoks

Hebeloma cavipes: taimlas individid läbisegi, duurim hõlmab palju seemikuid ja katab 20-30 m

Glomuse liigid ja arv. Afrothismia liigiteke on korreleerunud peremehe vahetusega sõsar-seeneliikide vahel

15N mõõtmine ja hea seos mükoriisatüübiga

notüüp (95%)

ErM seemed Woosia ja Leptospermum terves juurestikus (1 m eemal) juurest saadud kultuuride põhjal. Palju selliseid isolaate, mis hiljem ErM sünteesida ei õi

bakterid-nematoodid-kiskjanematoodid: BD idiosünkraatiline efekt biomassile

Wilcoxinale parem turvas-vermikuliit-MMN kui Petri tassi agarsööde

istandustes

metsanduses metsanduses EcM inokul kasutamine. Eriti troopikas ja kõr,  
vs ECM: üleva puhaskultuuris jm kasvatuste tarbeks; inokuleerimismeetodid

, apical pore +/-)

inokulumi potentsiaal

Eri eCM see; Eri eCM seened mõj erinevalt Mä ja Kuuse kasvu

oseolus, Scleroderma aurantium sünt Pinus sylvestris. FAIL: Chalciaporus piperatus, Clitocybe geotropa, clavipes, infundibuliformis, Lepi

eritaimed, mükoriisa, sklerootsiumid, eri kasvusubstraadid, söötmed, nõud, tingir viljakehade, ECM säilitan

leesikas: paljur leesikas: paljundamine vosudega: juurdumus 10 näd 66% 1% IBAga  
Arctostaphylos, Arbutus

istandikes

(Inoc), Auriscalpium (Russula)

mineraalained, vegetatiivne inokuleerimine MMN pH 7

ses ka oluline nestedness taimedel

l. Arv et maasisesed vormid eriti rohkelt rühmades, mi on äsja ja kiiresti radieeruvad.

poud: Suillus hoiab taime kasvu korgemal poua ajal, ECM kolonisatsioon ei vähene, Terfezia mood ECM kuldkanniga MEA söötmel; Terfezia ei soodusta juurte teket ku Helianthemum-mikropropagatsioon, meristeempaljundus

alad. Hüpot, et EcM seemed käituvad talvel saproobidena. Pakuvad, et Clavulina Cinerea on eriti saproobsete omadustega. PROBLEEMID: kas ens akt EcM se

kuusk:boori vähendamine-pole oluline

edal teised ECM puud; AM kui pole ECM puid; AM "ultramafic" pinnasel. Mõl liigil mõl MR tüübi kolonis v var

liga: pms kottseened, mis omavah sugulased, jmuidu oli ka muid, sh Cenoc, Geopora cooperi, Rhiz rubescens, Tom pilosa. Arv kottseened on arvukamad paras

perliit-turvas 9:1

Tuber melanosporum: pop-gen distance decay 5 m; samal puul võib olla mitu seeneindiviidi; vaba ristumine 90 m piires (ala suurus). Os

Tricholoma matsutake: IRAP: seeneringid koosnevad mitmest geneti. Arv. Et uued geneti tulevad shirosse seksuaalsete eoste levimisega. Samas uued geneti

ECM vs Tricholomopsis agaril ja sümbioosis

mass; T. rutilans üks tüvi stimuleerib, teine inhibeerib

kuks -juurtes aerenhiium, klonaalne kasv, osadel kambriksed juured, aminohapete omastamine

ndavad biomassi, vähendab juhuslikku varieeruvust

süsteemiga kolonis suurem puudele lähemal kui kaugemal  
Hebeloma spp, omapärased mikroosmid, kuhu terve plaadi peal olid EcM seened et

oste idanemise efektiivsused. Võrdlused taimeseemnete dormantsuse ja pikaealisusega. Kiidab Brunsi artiklit

MRA, Fusarium sp, Heteroconium sp. 5-l taimel seente peremehe-spets pole

ides suured erinevused; virtsas Ascobolus ja Psathyrellaceae. Komposti töötusel on mõju väiksem

YTUD on laborireostus; ohtrus ja sagedus on väga tihedalt seotud;

red erinevused juurtes vs mujal või üleujutatud vs mitte-üuj mullas. Domin Cladosporium sp; seltsidest Sordariales; klassidest SordM ja I

P ja eriti N väetamine vähendab EcM kolonis;

xxx

juured, pealsed Tricholoma tridentinum: erinevad meetodid: vja metsamulda ja tahket

imiga) kolonis 28-85%; Isoetesel 0%

pistokstega pal pistokstele

IBA stimuleerib männi juurdumist ja ECM teket ; 5ym TIBA stimul juurte teket, seen

N ja poud ei mõjuta ECM kolonisatsiooni ega liigilist koosseisu

mistehnika kahtlane, saproobide lahutamine peale proovide pikka seismist!!!); EMH produktioon suurim keskel, kus lühikesed rohundid domin, sealh korrel se

taimekasv eri lehekõdu tüüpidel mitteadiitiivne, idiosüinkraatiline

García M, Sousa FD, Stefańczyk E, Tadych M, Takamatsu S, Tian Q, Udayanga D, Unterseher M, Wang Z, Wikee S, Yan J, Larsson E, Larsson K-H, Kõljalg

image analüüs eri halltoonitasemetega

saproobid on v erinevad laguaktiivsuse poolest, suutes lagundada tselluloosi ja õlgeseid, võimelised kasvama laktoosil, Mõned EcM seene eri morf Frankiad

elektronmikroskoopia

Robinia: AM, Rhizobium, korge CO<sub>2</sub> ja kombinatsioonid paremad kui niisama,

samas [N, 15N] väiksem

koloniseerimata juurtega.

ood EcM paremini Afzelia enda ja põllumaj-mullas?! ent mitte Amhersteae mullas. Kumbki ei mood EcM mahavõetud metsa mullal; Arv Amhersteae ja Afzeli:

kadumisega. Xylariaceae-endofüütidel on lisaks ka ligninolüüt omadused ja nad püsivad kauem

ski võimalik

P ja sekveneerimine sarn tulemustega, mitmed DGGE bändid on kimäärsed artefaktid; v madal liigirikkus. Reassotsiatsioonikineetika võrdlus, diskussioon

kseerivate Ba Wilcoxina kultuuris kasvab vabalt läbisegi Phialocephala, Phlebia gigantea Wilcoxina pH opt 6.5-7

populatsioonide erinevus metallireostusega ja kontrollaladel

juurekaela diameeter spetsiaalse anduriga  
süntees ebatsügaal jt okaspuudel, sh Lyophyllum, Suillus, Rhizopogon  
Lactarius deliciosus > L sanguifluus: Pinus pinaster > P sylvestris. Eri

eostesse ei näi paikapidavat

rib pärast kuumust juurtel, on eoste poolest suurema kuumataluvusega



turensivõime

mänd vs hirss; ECM parandab männi positsiooni ja supresseerib hirssi

kaar tugevalt toetatud klaadi; arv ei toimu seleksioon maasis ja maapeals vahevormide vastu; maasiseste vormide tekkides ITS var ei muutunud

mullaorganismidega neutraalne tagasiside; oluline ellujäämise ja kasvu jaoks voistlus

1 tagant (proovid 1m vahemaadega)

naardumiste hulka; Soovitavad mängida eraldi justnimelt oligoA sabaga; ei soovita fragmenteerimist (kontrollimatu valepaardumine!)  
Sclerod citrinum, Suillus 5spp, Thel terr, Xeroc chrysent mood EcM. Tricholoma 4spp, Lycoperdon 2spp, Lepista nuda, Inoc maculipes, l

taimekasv suurem ecM taimedel ja oietolmu lisandiga taimedel, suurem N, P sisaldus  
taimekasv suurem ecM taimedel ja surnud nematoodi lisandiga taimedel, suurem N, F

kask 25 min H2O2 h, d, mass, lehe petri tassil+ tsellofaan

1 Nothof VAM

EcM Hebelomaga nakatatud pinnases on Pythiumi nakatumisvõime väiksem

generalist ECM-seened suurendavad süsteemi taimede koguproduktiivsust vrd ilma E

generalistid ECM-seened leendavad taimevahelist võitlust generalistid ECM-seened leendavad taimevahelist võitlust segakultuuris  
metsakasvatases, kommertsinokulum

s skaalast, füüsikaline sobimatus, interpretatsioon; dimensionaalanalüüs

phaerosp hinnulea. Pez kõdulagundajad. Üksikute liikide ökol. Tuleasemete elementanalüüs. EcM seentest sagedad Laccaria spp, Laccaria. Suured pH erinevused vs põlenud la vahel.

sarea,  
st liigikonts, sest s o praktiline

O<sub>2</sub> transport veestressis jurte kaudu: mänd -läbi ohukanalite steelis; kuusk -läbi koor

tiivsus. EcM puudel üldiselt madalam pH kui AM puudel risof vrd bulk soil, ent see võib olla okaspuude" efekt. Risof pH korrel tugevasti vihmausside arvuk

EcM-Rhizopogoni efekt männile sõltub genotüübist ja on päritav, sõltub

rododendroni juuri. Rhizosc. Ericae koloniseeris rhododendroni juuri, mood ErM, aga kuusel oli endofüüt. Demonstreeriti ka üheskoos. M. Variabilis kolonisee

Tuber: ECM: vaja klooramfenikoli eoslahus ja vermikuliit-eoste mass

anud EcM seened Diptero N-Aafr-s. Paleogeenis. Arv siiski praegused Lõuna-poolkera EcM-kooslused on fragmendid ammusest ühtsest floorast (lk 149). Ex

jud vihmametsade taksonid sh EcM leguumid diverg miotseenis-plotseenis, ent muidu liigid eri vanusega. Liigiteke ja endemism pms mägiadel

alternatiivsed meetodid lehealgete arv ja agaritükk

mullast puhaskultuuri

nemist; mõju taimede kasvule isolaaditi väga erinev. Dendrob orhideel stimuleerib elumust ja kasvu hoopis Vanillast saadud Tulasnellad, ent t

test.

iiifilisus palju väiksem kui varem arvati  
, representatiivsus

seente fitness võitluses endi ja teistega

stada tuleb, et bakterid asex organismid.

**Phialocephala fortinii**: ühel 3\*3m plotil 4 krüpt liiki ja v palju isendeid. Paljud isendid püüsid läbi 3 aasta ja mood väh 3m diam geneetid  
aatiliste muutujatega

seentel (perek tase) erinevused aastati ja kasvukohati ning EcM vs EmH

inokuleeritud Pisolithuse kiire väljatõrjumine kohalike seent parim: linnamuda+Pisolithus

EcM inokuleerimine annab 5 aastat hiljem 3 eri puuliigile väga erinevaid  
biomass, N, P, eksponentsiaalne söötmeresžiim: parim 12 mg N/puu kokku  
4-16 nädal, ma p-v-l ettekasvatatud

usgradientfuugimine, spetsliikide määramine bakteritel, hilisem funktsionalgeenide otsing

avatel ning epifüütsetel veidi kuivemates tingimustes

asuse ruumiline autokorr ulatub kuni 50 m-ni

oolyakryylamiidgeel. Kõrge taust, piikide pikkuse kvantit arvestamine, kerge varieeruvus replikaatide seas, geeli mõõtmist ei replitseeritud, regiooni pikkused til  
AM inokuleerimine parandab oluliselt India puude kasvu kaevanduspinnasel, suurend

vs ECM seened puhaskultuuris, kultuurifiltraadid, puhverdatud keskkond

v Tulasnella

adalt isoleeritud seen suurendab kasvu enim, idaneb ka asümb; Corallorhiza odontirhiza: idanemiseks vaja külmastratif; Liparis: idanemiseks suvaline Tulasnell

x

nastavad eelistatult aminohappeid mineraalse N üh asemel ja suudavad mõnevõrra omastada N kitiinist ja muudest kompleks-or-ühenditest. EcM seentel puudul

as ektomykoriisete või erikoid MR-seente kasv ja sümbioosi teke kas erikoididel või kasel

mullast; Kõik Pyrolaceae liigid on seotud EcM taimedega; Ei ole õnnestunud näidata radioakt C liikumist Salixist Pyrola rotundifoliasse. Arv et Pyrolatel pole

e odoral; Xerocomusparasiticus Sclerodermal -arv et võib-olla toimub parasiteerimine ka mükoriisadel

Laccaria ja Thelephora koinokuleerimine oli 12 kuud hiljem parem kui kumbki seen e

väikesed genetsisuurused K-strateeg-seentel

l kui geogr kaugus fülogeni BDle. AUS-sse introductseeritud puudel samad endof mis N-Am samal liigil

turbasammal sureb kui Lyophyllum palustre seda koloniseerib; Galerina parasiteerib |  
katteseemnetaimed: N; parasiit vs sümbiont

valgus: varjukaartlikud liigid kasvavad kiiremini ka varjus kui varjutaluvad muid aegla

nulla toitaineid (suurendab) ning AM-seente kooslusi Aafrikas

gümnoteetsiume, mis sam teleomorfse perek Myxotrichium omadele. Viitab O maiusele kui kiirele orgaanika lagundajale

dud taimeliikide invasiivsust stimuli; paljudes kohtades mutualistidel on unikaalne funktsioon

ECM kasvu ei mütseeli ja vee segu

x

ECM vs Actinomycetes: peamiselt inhibitsioon

kontseptsioonist

t

mändidel koige paremini (suurim elumus ja kasv) kui inokul mannimetsamulda vs pul

pH taimejuurte ümber

ynthase geeni, mida va-mä seentel ainus koopia. Muudelt genoomiomadustelt vama ja prmä seemed sarnased

erinevad spoori ja mütseeli inokulumi kontsentratsioonid

Russula subsect foetineae Indias Dipterokarpuste metsas: suurimad genetid >70 m pikad [arv ISSR pole piisav eristamiseks geneteid]. On ka väiksemaid geneitei

eellased; II tihe asustus kõigis taimekudedes, k-a jurtes ja seemnekestades -nt Phoma; III lehtede ja varte seemed, infekts sporaadiline; IV ulnud Rhizobiumid: IGS, nifD ja nodA fülogeneesi põhjal domineerivad POR kohalikel taimedel

ie

mass

ajut on saproobid v Helotiales

Tuber mela Tuber melanosporum: veget faas haploidne, mükoriisades vaid 1 MAT-tüüp; VK gleeba on alati üks MAT-tüüp, eosed pooled

biomass kolbis: IAA aktiivsus, ECM petri tassis

vs CO<sub>2</sub>; vs veestress; ECM, juure mõõdud, lehe [N]

imede rakendus metsanduses, põllumaj ja keskk stabilis. Mükoriisaseentel oluline roll muu mineraaltoitumise kohalt

tustest pärines eri kontinentidelt. Parim ITS barcoding vahemik on 96-97%. Inocybe on identif ka rohujuurtest, mida arv et see on kas m

d  
semel ksülaan, lisaks palju vitamiine, seleniit, org-happed. Pms uued alfaproteobakterid ja atsidobakterid

Melampyrum oli palju parema kasvuga ja reprod mykoriiss Melampyrum oli palju parema kasvuga ja reprod mykoriissetel mandidel kui mitte-M

ntel

listada liigisisest BD rühmasisesele Bdle? AM liigikontseptsioon; erinevate v erin tuumade olemasolu AM eostes  
en tahab oma evol mudelit

ECM seened kasvavad reeglina palju paremini NH<sub>4</sub>>glutamiin>gluta  
Am ning Eur ja NW-Am disjunktid on v vanad ja tek enne Thulea silla katkemist. Ei saa väita, et NE-Am ja Aasia vahel oleks liikide suunaga liikumine. Eur-NV

Burkina Faso: Isoberlinia, Brachystegia, Uapaca, Monotes: pms Bole

cortinarius sp  
Amanita muscaria: kattuvus???

ECM +-MHB vs patogeenid agaril

on väga väike ja eri liikidel v sarn. Glomus intraradicesi arvukus korreleerub taime N-sisaldusega

silendatud kõverat ega seega permutatsioone

utatud esinemine). LIBSHUFFID jms pole eriti võimsad. Unifraci indekseid ei saa usaldada



lakse jkinni

deemide rohkust

Mõned seente metaboliidid inh fotosünteesi

is võib olla ühes geenis; Juurte-endof kolonis on pms laiem, mitte nii lokaliseeritud kui lehtedes-vartes; endofüütidel-parasiitidel v palju sarnast

kal. Sama liigi uued genotüübid võivad kohalikud välja tõrjuda või geneet modif. Invas se **EcM ja AM seente introduts: ülevaade ja ohud**: seend ei pruugi sood

genotüüp. Oluline osa sellest on pärilik hübriidide järgi. Ühel liigil küll, ent teisel mitte.

EcM seened parandasid 2 dipterokarbi liigi kasvu ja P konts. Liigispets erinevused ta

list profiili

! Arv. Et ErM ja endof kattuvad

**Laccaria bicolor** Laccaria bicolor: introdutseeritud vs kohalikud tüved

**Laccaria**

nis mitte-tavapärasest peremeest. Peremeestaimede omavah hübriidid on ainus moodus, et hübriidsed seened leviks liigipiirest edasi

davad küsitavaks saproobidel ja endofüütidel vahetegemise

**Leccinum duriusculum**: noores metsas suur genet, vanemates palju väiksemaid: rajaja efekt -1m kasvukiirus a-1

mblad. Arv assots tek konvergenselt

proobide BD kasvab, Hypocreales kasvab, ent Lecanorales, Helotiales, Geoglossales, Rhytismatales kahaneb

**Rhizoctonia**

antagonism, probleemid, analüüs

**ECM vs Rhizoctonia**

uued meetodid

mass

mulla mesofaun mulla mesofauna parandab, sõltuvalt f-n grupist taimekasvu ning N-si

ad assots nii kottseentega kui Sebacinalestega, ent vaid Cavendishiooidid mood rakkudevahelisi hüüfe ja õhukese seenmantli

81%. Arv et sekvensid , mis on >95% identsed kuuluvad samasse AG-sse või subAGsse.

jämedus

xxx

lla sp (arv nonEcM

Deterrimus) viljakeha tükkidega 18-a kuuskede inokuleerimine mitmed EcM seente kultuurid stimuleerivad seemnete idanemist

lehüdrogenaasi abil hoiavad tasakaalu. OXAc lisaks Mn kelaator.

uster. Patogeenid ja endof tihti v lähedased. Mõnedseened üldiselt endof, aga introductseeritud patogeenid (Ophiostoma, Cyphonectria). P

M

C ülekanne Betula>Pseudotsuga metsamullal

juured vs lehed vs varred; N, 13C, 14C, mass, lehepind, fotosünteesi intensiivsus

ebatsuga vs kask, ECM amelioratsioon

fotosünteesi aktiivsus suurem juurkontaktiga puukestel kui isoleeritud puukestel

; Boletellus 2, Tricholoma 1; Leucopax (peab NM); Amanita:???; Inocybe 3; Cortinarius 5; Russula 23; Lactarius 19; Scleroderma 1 (S. s  
llus 2; Russula 3

t 2 spp, Inoc, Alnicola 2 spp); Subtroop metsades vaid Allophylus edulisega -Gyrodron rompelii; Salix humboldtiana lodud: Heb austr., Neopax ech.; Lõuna-Bra

õrrel taimekooslusega, ent bakterite ja AMF koosluste korrelatsiooni tingib pH. Partial Protest analüüs  
kaalu 5-61% võrra. Nakatunud käbidel idanes 8-19% seemnetest

mikropropagat: mikropropagatsioon: pärm vs Tuber borchii

ärgistatud mitte RNA. Kogu-RNAle ei mõjunud traditsioonilised signaali ja spetsiifilisust tugevdavad meetodid peale formamiidi, Puhastamata mullaekstrakt inl

taimede konkurents mineraalainete p steriliseerimine + seejä N, P, juured, pealsed vs AM ; Pseudotsuga vs Calamagrostis

metsamullal konteineris

amine ei seostu 5kolonis, kasvu stimul-ga. Seente kaudu toimus P saamine eri AM-seened tekitavad eri taimedel kas Arum või Paris-tüüpi mikoriisat. Paris-tüüti

Dipterokarbid: poolvarjus kasvavad seemikud kõige paremini. Fagace

alfa-proteobakterid (Rhizobium, Bradyrhiz. J1) ja troopikas lisaks beeta-proteob. (Burkholderia spp -fix. N ka rohujuurtes)

erinevate okaspuude seemnete idanemine eri soo mikroosakestes: erisambad on olulis

suurus, kogu liigirikkus, võrdlus, usalduspiirid

Mükoriisa on oluline taime transpiratsioon ja fotosünteesis

õud hübriidid, levik lihtsam

Phellinus

kuuse ja lehisepistikud: Kuusel Laccaria ja Boletinus Cavipes ning eriti IBA soodustab lehisepistikuid; Laccaria soodustab juurte, mitte kulluse teket; NAA ja ethefool

antagonism  
xxx, tuuma ülekanne

Heterobasidi antagonism

õud genotüüpid inkorporeeritud haploidseid eoseid et säilitada potentsiaali, sest on tugev konkurents, vähe toitaineid ja vähe vaba ruumi

õud taimedega aladel kui mullas. Kerged erinevused 10 -50 cm 10-kaupa kihtides

Cantharellus: spooride idandamine ja viljakas tükide kultiveerimine

Kastani mikropropagatsioon seemnetest ja seejärel pungadest. ECM hilisem süntees

ener praimereid, mis arv on põhj spoorisis erinevusi eelm uuringutes

mulla mikroseened vs ECM sünteesikatsetes: mitmed inhibeerivad

Ilia. V sarnane Cornus canadensise juure-endofüütidele. Väga vähe leitud ka Verticillium fungicola

xxx antagonism

Laccaria vs Fusarium, tugevam kui vähe C-ühendeid; kultuurifiltraadid inhibeivad idanemist

Populus: F1 põlvkonna võime moodustada ECM

liikide paiknemine juhuslikult

mass

nasemate DNAdega; graafiline esitus klaster/puu kujul erikeskkondades leiduvate geenide kohta

glutaaraldehüüd fosfaatpu  
Tylospora: väga kerge ku

Laccaria amethystina  
arutelu

mükoriisast puhaskultuuri eraldamine

inokulumi potentsiaal: väga erinev BD võrreldes päritolukohaga

!lt mitterekombin seemni polegi teada. Fülogeni liigikontsepts langeb kokku morf-iga, ent peenem. Spetsialiseerumine eri peremehele, peremehe eri kudedele, regioonide erinevus

Shorea spp: EcM kolonis ja kasv on parem valguse käes kui varjus, ent enamasti liike

mineraalide sis: eelkasvatus, ümberistutus koos inokulaadiga

emas staadiumis üheltki liigilt ei leitud. Seemned idanevad ka hästi ilma sobiva seeneta ja kasvukohtades, kus liiki looduslikult ei kasva.

; vahet pole steriils ja mittester pinnasel. Mittester pinnasel kasvab ka muud seemned; Külm 100 000 eost poti kohta parim; vahet pole steriils ja mittester pinnasel

Allocasuarina all palju seeni, mis samad eukalüptide ja akaatsiatega; Casuarinade all v vähe liike ja harva

idi erinev ka peale Ps. Fluorescens inokul ja fungitsiid imazolili kasutamist. PsF ise vähenes aja jooksul tunduvalt

Phlebopus sudanicus: väidet on EcM, aga tegelikult mood vaid seenr

genetid kuni xxx-genetide määrag  
peale inokuleerimist avamaal

ECM soodusta mycobeads

Robinia: AM, ECM, Frankia parem kui niisama, kõik kombinatsioonid paremad kui y

parim kui oli ECM + seemned. Seeme mõjutas rohkem kui ECM

niidutaimed: eri koloniseerimine, suremus, konkurents võimaldab koeksistentsi

estades mullaparaameetreid, selet 20%. Leiti EcMF ka paikadest, kust peremehi polnud - arv idanemisvõimelised eosed

liikidevah antagonism

692 693, 697, 698 res

eraldus  
säilitus

suurem seente arv mikrokosmis induts kiiremat substr lagunemist, kuna tihed seemned induts teisi. BD efekt suurem tselluloos

A-seened; Ruumiline autokorrel üle 10 m.

idel

t inokul mittester pinnast (10 000 000-40 000 000), ja MR kolonis mittesteril 2 korda või 10 korda rohkem eosid vaja et inokul mittester pinnast (10 000 000-  
: vaid v vähesed liigid saavad seal elada. Vaid EcM elustiil pole eeldus monodomin-ks, ent soodust faktor. Arv et monodomin soodust ka varjukas ja ühtl võra,

iem ja toimub suksess. 20-a-katse.

ed tek kohastumusena per põuale, aga ka külmale. EcM seente tekkeag arv langeb kokku esimeste imetajate ilmumisega. Osad seened minitseerivad puuseemr

s. AM biomass juurtes mulla pindmises 10 cm kihis 4 g/m<sup>2</sup> kõrbes kuni 44 g/m<sup>2</sup> rohumaadel.

idevah sama perek sees

luline roll taime immuunsüsteemi kujunemisel

orhideedel vs saprotroofid (soodustavad idanemist)



nnavad erinevaid tulemusi OTUdeks tegemisel sama barcodega; eri perekondadel liikidel erinevad ITS erisused liikide vahel. Eluviisi mõõdetas ca 50% isolaatidest

ente klassides taime hõimkondade kaupa. Ligi 25% Männi lehe-endofüütidest lagundas edasi ka okkakõdu (sh ülejäänust 66% olid singl

Thelephora ECM rohkus tugevalt neg korrel juurepatogeenide arvukusega

ndronil, samas juure-endofüüt paljudel muudel taimedel ja saproob mullas

matsutake: P/V, SH sööde glükoosita, kiire ECM teke

Tricholoma matsutake + Pice abies, Pinus sylvestris ok; erit

es septadeta ning ei suudetud rühma tuvastada

ipidev ühtlane valikusurve

olla sarnane taimede ja loomadega. Ei ole siiani arvestanud mikroskaalas kk heterogeensust. Ruumala on palju parem näitaja kui pindala

N, P, mass: sõl paju pistokstele

teemides kui rikastes

pikkused, N,P : agaritükkidega; AM-ristiku juurefragmentic glutaaraldehüüd

mass, N, P sisaldus

AM amelioratsioon

ted mõjutasid taimede funktsioone eri aastaegadel. AM BD ei omanud positiivseid mõjusid. Teatud AMF liigid andsid taimedele rohkem P kui teised.

vad rohkemate AM-seentega, ent tagasiside oma mullaga negat-neutr. Invas kõrrelt saadud seened ei pärssinud kasvu, ent kohalikult taimelt saadud seened pärs

niiversaalsus. v oluline on uurida interaktsioone laiemalt, mitte vaid 2 osapoole vahel, vaid kaasata ka muud seonduvad. Taim-patogeen + mükoriisa, antagonist,

gevusega kohtades, biodegradatsioon-kiire konjugatsioon ja originaalbakteri häving

sioon NS31-AML2 ja ilmselt ka NS31-AMDGR. Soovit kasutada kahte kattuvat paari koos, sest OTU-rikkus ja koosseis täiendavad tein

AM-seened

e ja seente ning bakterite sekveneerimine: DNA, rikastatud RNA ja rikastamata RNA annavad eri tulemusi - näitab mikroobide aktiivsus

; Varieerus eri taimeliikidel

juurdekasv väiksem topelthuumuse kihil ja väiksema %ECM korral

eri kogus Al:talub üsna hästi

ora terrestrise ensüüm aktiivsust soodustas teiste EcM seeneliikide manulus. Ensüümide akt korreleerus taimede N-sisaldusega.

, mitteperfor parentosoomid; klamüdosporid; kolonis juurekortsit

enoomisuurusega ega sellel ole ka fülogeen signaali (genoomisuurus on konserv); Parim liigi-tasemel threshold 99%, perek tasemel 95%.

unktsioonis. Võrreldavad liikidena

jutine, peale kontinentide drifti

arbikuliste juurtes

vs inokuleeritud *L. bicolor*-standikus ei lase teistel liikidel eelnevalt *L. bic* x

õjutavad taimekoosluste funktsiooni. Osad seened soodust taimede prod kui palju P allikaid oli mängus.  
*ericae* ja *Phialocephala fortinii* ja *O. Maius* -arv komplement-efekt

sidele 6 probet  
obet

selged substraadi/elukeskkonna eelistused. Ringpuu

uhmerdamine enne CTAB

: Hymenosc. Agregaatid. Erikoidse ja ECM isolaadid enamasti samades klaadides ning 100% ITS Idga. Muude taimede juureseed pms eraldi: Lachnum, Pyren

suunad mükoriisa uuringutes, eriti geeniekspressiooni osas, Huvitav valdkond ErM seened lehtmetsades

olide lisamine, tugev mõju männiokaste lisamisel. Fenoolide lisamine stimuleerib eriti seeni  
se efekt oli väheoluline. Domin Epicoccum sp, Capronia sp, Agaricales sp, Mortierella sp, Metharhizium sp, Fusarium sp. Teiste hulgas ka EcM ja endofüütsed  
tekv põhjal väga erinevad tulemused

ECM vs erikoidMR

CO2 vs N tasemed: polnud erilist mõju

vedel N2

biomass: ECM sama  
N, P, K, suhkru sisaldus, biomass  
kasv parem kui spets seenekamber  
kasvab paremini kui lisada biotiiti või KCl K allikana

vedel N

vedel. Mullastikus suhtes erinevus hõimkonna ja alamhõimkonna tasemel

um (hiljem = C. Finland.). Määrati P. Dimorphospora (Richard ja Fortin) Ph. Fortiniiks - arv. = Melini MRA. Chloridium ja Phialophora

thera (Euphorbiaceae), Goodenia, Acacia, Pultanaea, Pomaderris, Trymalium (Pom), Thomasia (Sterculiaceae) ja Styliidium (Stylidiaceae)

isolaadid mood ainult OrM ja olid endofüüdid

Lobelioideae moned 1a Austraalia liigid mood EcM (Lobelia heterophylla), teised mc

(mitteMR); Lachnea vinosobrunnea (MR); Peziza whitei ja Muciturbo (mõl MR); 2a Boudiera tracheia (MR); Plicaria alveolata (MR); Plicaria endocaroides

eucalyptus +Endogonaceae. Kasv suureneb 10 korda

urtest isoleeritud seente abil: Thelymitra spp ja Diuris spp vs Tulasnella calospora jpt. T calospora on parisperemeeseen, mille isolaatidel v erinev efektiivsus s

male (Cerat, Tul, Serendip, Tricharina v Peziza). Ristumine sõsarliikide vahel vaid parapatrilistel, mitte sümpatrilistel liikidel; interaktsioone tekivad kordid. Nii maa pealse kui -aluse petmise korral limiteerib petetavate rohkus. Spetsialiseerumine on arv. üks liigitekke mehhanismidest

Hydroporus v ka Leccinum sugulane. Sclerogaster, Octavianina, Wakefieldia mood Octavianiaceae. Calostoma on arv seotud Sclerodermatalesega ja arv mood

Imusel ja kasvul pole vahet Thuja ja Tsuga laikudes

Tuber aestivum: tootmine Roots

Thelephora terrestris jt 2 liiki kui metsataimlate patogeenid ja puudekõrgist

!t. Jaguneb kaheks rühmiks: 1. S. Vermifera+ Piriformospora AM-taimedes + erikoidne ja jungermannoidne mükoriisa + OrM; 2. S. Incrustans, S. Epigaea, Tre

juurekultuuridele inokuleerimine

ed kui protokormiseened. Goodyera kasvu stimuleerivad ka mitmed temalt mitte-isol seened. Tipularia protokormidel, mükoriisadel ja CWD-l sama 14C muster

. Vaja kasutada DOIsid ja neid andmete kasutamisel ka viidata!

põlenguseentel valitseb konkurents hierarhia, kus varasemad tõrjutakse välja hilisemate poolt.

naadel. BD suurem märtsis-mais (kui liigirikkus suurim ja dominans Fusarium ja DSE sp1 olid vähe). Liike vähem ja dominantsus suurim jaanuaris, septembris. Fu

inlandia (ektendoMR, stimula kasvu mõl, er pH3 juures), Chloridium pauci **Phialocephala** dimorphospora (stimula kasvu pH3 juures, mitte pH 5.7), P fortinii (stee

puidus ja agaril; monokaartionite dikarütiseerimine mitmest eri kohast, mo saprotroofi puusse inokuleerimine punnide abil

x + kirjeldus

juurkonkurents preerias karmim kui metsas haavale, ent mitte Boutelouale. Haab ECM-puu

idudega transp oluline

ka eelnevalt on teada seonduvat mükohet taimedega

ja vartes vähe seeni. Risoomis Trichodermat pole)

il ajal; andmete võrdlemisel kas Chao1 ja ACE liigirikkuse hindajaid. AM kolonis vaid taimi, mis kasvasid kuivemal pinnasel. Ühes Taimes 6-10 liiki

soodustab rohttaimede kasvu

**Amanita phalloides** invad N-Am: VK enamasti leitud teede ääres, ent mõnes kohas ka sügaval metsas. Invadeeritud paikades

ed; arvukus väheneb vertikaalselt; suurim tihedus on maismaal

biomass: *Laccaria* eritüved: mono-ja dikaarüonid-käituvad sarnaselt, tüveti suured erilenevad eelkõige tuvastamata haruldastest liikidest, mis moodustavad pika saba

ECM seened juurte koloniseerimise pärast. ECM ja hüüfistiku asendumine, topeltkolonisatsiooni anatoomia

*Cenococcum*: levib primaarse suksessiooni aladele vegetatiivselt. Lähedastel aladel mõned identsed genotüübid. Mingit jälge paraseksuaalsusest pole. Mida vi

liseerijad, kust ECM seened annavad N taimele

niine. ErM juured said rododendroni pinnaselt paremini kätte N ühendeid kui ECM ja AM taimed - tegu nii suurema SRL kui ErM seentega Serendipita vähem ka ECM-seeni, *Phlebia* ja *Mycena galopus*. Juurtest identifitseeriti palju lakaasi-sarn peroksidaase

sterilis., spets toide

mitmetes süsteemides: matsutake, eri väetiskogused-oluliselt ei mõjut  
pealse kõrgus inokuleerimine kolbi (p/v; MNC sööde)

lepal ECM mood eelduseks on nakatumine Frankiaga. ECM seened suurendavad veelg

*Kalmia* (Ericaceae) inhibeerib

mesid alpha mullaseened vs. Girdling: kontrollis EcM seened Cortinarius, Atheliales, girdling: Helotiales, Serendipitaceae, Ganodermata  
ei klapi

veale inokuleerimist. Mikrosklerootiumite teke ja sisald. palju polüfosfaati ning glükogeeni, mis arv. taimest saadud

n orhideedega primaarselt seotud.

Na-hüpoklorit 10 min kehvem kui Hg-Cl 3 min

leesika seemne leesikas + mfg seened sh kuuseriisikas (Lactarius sanguifluus), Rhizo

akorda on seotud taimede liigirikkusega Tilmani plottides; samas muutused mikroobikooslustes ei korreleeru ühegi taimeliigi ega funktsionaalse rühma puudum

u

kasvuhoones Tuber borchii vs Hebeloma sinapizans, Laccaria, kontaminandose suspensioon: Tuber  
ECM: Tuber vs Hebeloma

da suurem on kolonisatsioon

da suurem on kolonisatsioon

retsakõdu all sama halvasti kui laboris, v.a. Üksikud erandid. Need, kus idanemine toimus: Tulasnella, Thanatephorus ja Ceratob v harva patogeensed EcM taim

populatsioonidünaamika, geneetilise distantsi, pop jagunemise teooria, metoodika, kitsaskohad: ülevaade  
Mycosphaerella graminicola: vt pealkiri, levikutsenter Lähis-Ida; samal lehel enamasti erigenetid

lest mood katseliselt ErM. Phialocephala fortinii ja üks kandseen mood mõnikord coile meenutavaid struktuure

|  |  |
|--|--|
|  |  |
|--|--|

|  |  |
|--|--|
|  |  |
|--|--|

diversiteet ning liigirikkus palju suurem, domin pole; all tugev domin, domin ka üksikud fülogen rühmad  
nkurents, isol bakterite diversiteeti mullas mõjutab C-rikkus, C-heterogeensus, konkurents, isolatsioon, vähem kk fluktureerumine ja C ülekuillus. Kui isolatsioon

üldkatvus vs d, h, mass, %ECM

Suillus grevillei

Suillus grevillei 2 metsas 2 aastal. Aastati genetid prod viljakehi eri paigus; genetid suuremad 35 a lehise monokultuuris kui >85a lehise-segametsas. Arv viima  
ISSR e SCAR mikrosatelliitmarkerid (3) Suillus grevillei jaoks -3 markerit ei võimalda kõiki indiv eristada, eri kodominantsed markerid on lokaalselt tugevasti

Kalmia (erikoid) vs kuusk

kuusk vs kalmia allelopaatilised ühendid (fenoolsed orgaanilised happed): tugevalt pä

l on N-miksootroofid, kuid mitte C-puhul (v.a. Orthilia secunda v varjukas metsas: 28%). Ei korrel valgustingimustega. Pyroloidid seotud paljude eri EcM seente





SILVAs olevatele; samas Ameerikas enamik laiemaid fülotüüpe 90% tasemel kattub. Central Parki BD akumulatsioon on vaid 6% n

st seletas SQRT-sekventside arv. Eri seeneharudel erinev trend kõrguse suhtes ja taimede-BD suhtes. Glomeromycota ja taimede-BL

as eri taimede lähedus vähem kui baktereid.

ite hõimk muutused väikesed

sarnasus. Suht-ohtrus vs. abs ohtrus. Pushib oma arraysid

ärad koosluse str tuvastamises. Ruumenis eri hõimkonda kuuluvate organismide kooseksist ja vältimine eri põhjustel, ent ka geogr. e

ida madalaimat näitu(???)

one!! Kimääre+kontaminatsiooni 0.03%

Hansen K, Harrold P, Heller G, Herrera G, Hirayama K, Hirooka Y, Ho HM, Hoffmann K, Hofstetter V, Hognabba F, Hollingsworth PM, Hong SB, Hos

**13C: kottseened ja ikkeseened** fraktsion 13C erinevalt PLFA ja aminohapete koostises. :

**14C-rRNA eraldamine gradi** 14C-rRNA eraldamine gradienttsentrifuugiga, kvantifitseerimine, array lii

**Põhja-AUS Cairnsi** läh: Eucalyptus grandis: vanad puud ligi 100% EcM kolonis ja 2-20% AM kolonis, noortel puudel 10-90

AM vs ErM taimed erineva N, P juures

Ramaria: subgen Lentoramaria ja Echinoram. Ja asteroram. Isotoopide 15N sign baasil. I

<sup>14</sup>C hingamine väga vanas m <sup>14</sup>C hingamine väga vanas mükoriis as sarnane sellega, mis noores

OrM: Goodyera repens vs Ceratobas cornigeru OrM: Goodyera repens vs Ceratobas cornigerum: MR t

luses mitte üle 30 m eemal. N: Intsia palembanica saab EcM seened kui kasvab Dipterokarpide läheduses mitte üle 30 m eemal. Nakatumine juba 1 kuu pär

spooride idandamine bakterite mõjul

BD mõjutaja: takistab mitesobivate taimede kasvu

dikarüootne mütseel vs sobiv pinnas (vulkaanilisel alal)

NH<sub>4</sub>NO<sub>3</sub> mõju mullamikroobidele: Laccaria t6

N omastamine: vana vs noor kultuur

kasutada ITS + 1400bp LSU endof uuringutes. LSU 4-geeni-puu selgroona. PROGED .

eaalses liike vähem, ent klasse rohkem; Lihhenikoolsed seened on tähtis allikas endofüütide BDle. Leiab vajadust ühtlustada prooviv

introdutseerimine

Ca-oksalladi kristalliseerumine

Piloderma fallax muudab mulla juurte ümber vrd mitte-MR juurte ümbrusega toitainetevaesemaks, er K, Mg, Fe, Mn, Al, SO<sub>4</sub>, NO<sub>3</sub> poolst

P jt ainete liikumine mööda tubulaarseid vakuole: ülev

mida rohkem valgust, seda rohkem ECM tek. 10-30% norm päikesevalgusest on kriitiline vahemik

15N taimedes, seentes, mullas üle kõrgusvööndite: kõrgemal 15N kasvab taimedes ja see

inokpot Minnesota tammesavannis vs N väetamine; vs resistant prop inokpot Minnesota tammesavannis vs N väetamine; vs i

ECM kooslus N gradiendil: kõikjal Cenococcum; kõrge

liigi alt korjatud seente isolaa Afzelia africana -tsesalpiiniline-ECM süntees õnnestub vaid sama puuliigi alt korjatud seente isolaatidega: Scleroderma spp.

4 ECM seene kas 4 ECM seene kasvu fraktaalgeomeetia eri C ja N söötm

sobiv substraat

ECM EMH jaoks võetakse koguproovist kohe PLFA18:2w6,9 ja ergo nin

tega. Kardetakse Nothofaguse metsade pärast

nasolu kohta

pole märke Suillus tomentosuse 'kivisöömisest' kui vaadelda seene kinnitumist mineraalpinna

13C, 15N sama hemipar ja peremeestaimel, N konts tugevasti korrel er vaiks N sisald peremeestaimel

13C: Taimede siseselt mõjutab 13C väga palju ökofüsi tegureid

DSE: Aspergillus ustus -voimeline omastama fosfaate n

märgitud fosfaati suudab transportida Tuberi viljakehas

delta C13, N15, S34: ohureostus mõjutab tugevasti metsi, delta N15 suureneb kovasti taimedes ja huun  
pajul nii am kui ecm soltusid enim ajast ja kohast kui N-väetamisest

iginaal juureproovidega

inokulumi potentsiaal: võõr-vihmaussid???

EcM seente suurem diversiteet suurendab org P, aga mi



väetamise korral

%kolonis)

sobiv N/P

N/P väetise erihulk

hüüpaporiin 10..1000 ym tekib eukalüpi juurte läheduses, mitte-peremeestaimed ei mõjuta; juurekarvad kaovad; muid mõjusid  
m . Mõl liigid ühendasid igast vanuseklassist puid omavahel; Ühel puul tuvastati max 8 R vesiculosuse genetiit. Networki teooria are

lehekõdu

N söötmes piiratud

va tõttu, mis võib olla teine faktor liikide vähenemisel

ebatsuga seemikute koloniseerimine teoste ECM seente poolt palju aeglasem, kui puu inokuleeritud Rhizopogoniga

lofüütidena. Kõigil Erica juurtest eraldatud agari-morfotüüpidel esines ErM mood võime. Pms identifitseerimata Helotiales. Puudusid Oidiodendron ja Hyr

ikade vahe; ent distantse kasvades nii puupiires, puude vahel samal pollul kui eri poldudel ge distantse ei suurene. Üldse polümorfism väga väike: arv vana

mehest maksasamblasse

Tulasnella spp Cryptothallus mirabilisel, taassüntees mikrokosmoses, 14C

Ceratob, Sebacina, Tulasn; Dactylorhiza majalis: C13C erinev eri troofsusega orhideedel: mykoheterotr, autotroofid metsas vs niidul; seotud ecm-seentega

sink strenght seen N, P väetamine, mõõtmine

dium mükohet; Aratundismehhanismid ja C transpodi füsioloogia

ordselt labiilse troofsusega seltskond

kägistamisega väheneb männi EcM kolonis ja EcM ei moodusta mütseeli niivõrd. Suureneb MRA hulk

valgus väh 25%, kuigi Cenoc mood EcM ka väiksem a valgustatuse juures

aminoisobutüraat, aminometaan

ECM seened lagundavad kive ja võtavad Ca pms apatiidist. Nulul 95% Ca apatiidist, vahtral 60% ECM seened lagundavad kive ja võtavad Ca pms apatiidist

15N: muld vs lehed Nothofaguse metsades CHL

ECM kolonis, BD madal põllumaj-akti maadel < 5 -10 a mahajäetud põld < mets, preeria. ECM kolonis ühtlus suur põllumaj

e. Pseudoreplits disain, n=50. Paljude seente koosinokul andis parema tulemuse, eriti massile, veidi ka kõrgusele ja diameetrile. Arv

imekasvu [P], [N], [Fe], vähe algloomad pärssisid Paxilluse kasvu

suudega. Elumus vahepealne kui puudub nii juurte kui vanempuude EcM seente mytseeliga kontakt ja korgeim kui on ainult mytseelivorgustikuga kontakt.

substraat-inokulaat pärineb ECM puude lähedalt

13C: seente 13C rikkus viljakehades on ar v. Põhjustatud eelistatult 13C-rikaste süsivesikute omastami

ngut, aga mitte NH4 ega aminohapete omastamist

Üks Paxilluse tüvi mõjutab eri seemnepangast kuuskede

im sama suureks ning sisald sama palju P. Descolea ja Laccaria mood viljakehi potis, eriti madalat P lisamine: seentest oli kasu madalate dooside juures, a

EcM taimed samamõõtu. Mid: EcM seentest eukalliptile oli kasu vaid siis kui muld oli väga kuiv; muidu kontroll ja EcM taimed samamõõtu. Mida niiskem

idel (29% sagedus kõigist). Cf. Cenococcumi isolaat (95% sarnane) leidis kõikjal palju

kandseent (arv. Saproobid). Kultuuris vaid kottseened  
1 liike kui kultuuride sekv

13C: taimelehtedes toimub 13C diskrimineerimine nii difusioonis kui RUBISCOs. Üleva

PAH degradeerimine ECM seente poolt -vedelkultuur, suur sooltuvus subs

15N hulk korreleerus vastuyppidiseelt ECM kolonisatsiooniga

troopika 3 seeneliiki kasutatakse efektiivselt nii org kui anorg N-allikaid. Esines interaktsio

e mõttes. Pms Pisol, Sclerod ja Tom tüved

Thelephora: vaba juurestik

N, P hulk, N/P, põhjalik kirjeldus

N, P mõju mükoriisa tekkele ja hulgale

hutu ruumiline varieeruvus 15 EcM vs AM inokulumi potentsiaal: aastaajast ei olene AUS. Mirbelia diletata ja Eucalyptus calophylla reageerisid erinevalt. Inokpot AUS: v tugev ruumiline varieeruvus 10-cm skaalas, mulla häirimine vähendab EcM inokpot Mirbelial, ent mitte Euc

: kahtlastest teadetest -ecm puhul tulenevad pms HN mittetähtsustamisest

ECM teke: juure apikaalmeristeem kattub ohukese mantliga, seejärel tekib hartigi vorgustik ja paksem mantel, juurekarvad l N hulk, mükoriisa teke. Kõrge N>intratsellulaarne kolonisatsioon, t N, mõju mükoriisa tekkele, mikro-ja makroelementide s

sed

ECM konkurents ECM konkurents

P säilitamine polüP-na samasugune nii veget mütseelis l

seende sattunud C seende sattunud C paikneb seenmantlis ühtlaselt, seen d

l ja puidus EcM seened ei pruugi ise lagundada, vaid seda teevad saproobid

Clavulina jt talveseenel metaboolset aktiivsust talvel, C

ket, kontr-taimedel mitte; samas kontr-taimedel on kiirem biomassi taastamine peale biomassi hävitamist: trade-off

litamine agaritükkidel steriilses vees

lalahuses

tselluloosi ja selle osade mittedegradatsioon ECM ja erikoide MR seent

evad kompensatsioonimehhanismid

ootmisele

ECM tekke -mantel on õhem ja harti võrgustik on imelik. Cyl tungib läbi Laccaria mantli, ent mitte läbi Paxilluse seenmantli. Mitte-MR juurtel arenesid k

o osmootse surve, kaitse UV, kuivamise, ensüüm lüüsi, kõrge temp, oksüdantide, toksiliste metallide, arv ka funktsioonide eest. Patogeenidel allelopaatias, t

taimede BD  
e kasvu

sisaldus erivanusega ECM juuretippudes

transport P transport

ECM biodegradatsioon ja lignolüüs:ylevaade

liigisisene varieeruvus metaboolsetes ja füsiol protsessis liigisisene varieer liigisisene varieeruvus metaboolsetes ja füsiol protsessis

mükorisosfääri seened ja MHB mobilisatsioon Fe ja I

Phialocephala fortinii ja Phialophora finlandia suudavad lagund polüsahh

Orhidee annab seenele rohkem C kui ise vastu saab  
Goodyera repens: Goodyera repens: seene (Ceratobasidium cornigerum) j

hüüfid on võimeli hüüfid on võimelised elus-samblast toitaineid välja ime

| polnud sarn ITSe. Enamus seeni olid patogeense iseloomuga

Rhizopogon toodab palju Oksalaati vrd Hebelomaga ja parandab oluliselt taimede P-toitumist erin Rhizopogon toodab palju Oksalaati vrd Hebelomaga ja  
nokuleerimine erikontsentratsi; spooride sobiv kontsentratsioon

mis koosn isolaatidest. Seal eri isolaatidel eri AFLP muster, v sarn muster ja grupp võib tulla kaugelt alalt

Kongo Ituri taimeistik: 15N ja 13C negatiivsemad alustaimestik vrd ülaringega

N-ühendite imemine, transport: ülevaade  
ainevahetus: ülev: ainevahetus: ülevaade

N

Suillus viljakehi tohutult-arv saab kohalikust mullast lisa C-ühendeid, vähendab Suillus viljakehi tohutult-arv saab kohalikust mullast lisa C-ühendeid, väh

Na, Cl, SO4 stress

vs VAM

7. Tehti suurt vahet ka männi ja Scleroderma spp: männi ja eukalüpti kolonis eri liikidel ja sama liigi isolaatidel erinev. Tehti suurt vahet ka männi ja eukalüpti

Eukalüpti EcM seened eukalüpti liikide vahel ei vali, ent mändi ei nakata. Samuti ei lähe eukalüptile Suillus ja Rhizopogon

a rotundif eoste idanemise kirjeldus??????

vu, er Rhiz Kõigi kolme seene inokul ef on aritm keskmine. Laccaria oli algul rohkem, ent vähenes kiiresti Rhiz arvelt männi kasvu palju efektiivsemalt kui teised seened

siseste viljakehadega; Zelleromycese eose ornament kadus peale seedimist; kui panna eukalüpti seemikute juurtele, idanesid ja mood EcM väh 7 liiki  
seene viljakehade toiteväärtus loomadele: enamusele ei

EcM ja saproobid eristusid hästi. Parasiidid kas vahepealsed või ekstreemselt 13C vaesed

pinnase töötlemine: ebaseelge

aksonite

N väiksem ECM-taimes

N akumuleerumine lehekõdusse

respiratsioon P omastamine  
lehekõdus balanss

tu

orav Spermophilu orav Spermophilus sööb palju Elaphomyces: eoseid ei

ECM taimede kasvukiirus korrleerub C allokatsiooniga mükorüü

ECM koosluste tähtsus metsa ökosüsteemides: mobiliseerivad elemente mullaorgaanikast, kuigi ilmselt otseselt ei lagunda polümeer

uudus tuli 2\* kiiremini 15\*c kui 6\*C juures; hiljem juured taastusid  
uresteelis spets ohukanalid. Adapteerumisajaga juurte elumus palju suurem  
is, ent männil mitte. ,kuusel ksüleemi juurdekasv pidurdus järsult

15N: NM>AM>ECM>ERM. Globaalselt 15N kasvab temperatuuriga 0-30\*, N kons-ga l

!003 ajaskaala. Niiske metsa eukalüptid v liigivaesed -pärit niiskest ajast. Eukal haaksid radieeruma al 60 MAT, Casuarinaceae 47 MAT, ent põhirad hiljei



ja metsa vahel

Agropyron: pott jaotatud väetatud ja väetamata pooleks  
Agropyron: kahes kambris -taimekambris olev mittemüü

kõdu lisamine: suurendas kolonisatsiooni, vähendas liigirikkust

pinnasekoorimine vs humus vs nende serv: sama

ülevaade, viited

x

Cantharellus: CO<sub>2</sub>, aeratsioon

Cantharellus: mitte-liigniiskus, hapnikku, CO<sub>2</sub>, Pseudomonas fluorescens

Wilcoxinale pole vahet (kolonis 95-99%); turbal sama hästi kui turba vermikulidi segul v a Pisolithus. Taimekasvu ei mõj inokul ja kasv 20 näd  
pH: sesoonsus

algul E-strain; hiljem (3a) Suillus, MRA, Tuber. Lühijuurtel seened asenduvad üksteisega, mitte et juured sureks

ne männiga ja leesikaga+kirjeldus

hea kui kaevanduspinnasele lisada turvast, halvem kui väetada või lisada muda

13C, 15N, 2H, 18O kasutamise koetasandist indiviidi ja ökosysteemitasandini: ylevaade

pärast inokul.; aladel kus muud EcM taimed olid kasvama jäänud, oli EcMF BD suurem

seente toiteväärtu seente toiteväärtus võrreldav köögiviljadega, enamuse ar

Hebeloma: mono vs dikaartioid-sama

toiteväärtus Za; toiteväärtus Zambia seentel: Zambezi aladel 39

EcM kolonis sõltus fertiilsusest ja konkurentsist, aga mitte varjutamisest. Kuuse EcM moodustamist stimuleeris ja männil in  
ing tapavad Casuarina equiset Pisolithus ja Scleroderma sobivad Allocasuarina ja Eucalyptusega, ent ei mood HN ning tapavad Casuarina equisetifolia. Eu  
vastatud)

15N: eristuvad kõrrelised ja N fix liblikõielised. Puudel N fix liigid ei eristu EcM puudest ja AM puude

ECM% sõltub seene genotüübist; juurte koguarv taime genotüübist

eri arengulooga L.b. S238 osad vs ECM võime ja taimekasv

oni; eksperim küll vildakas ja sampling efekti mõju; kõikidel juhtudel mitu liiki parem kui eri monokultuurid

tamme ECM kolonis on palju tamme läh> Helianthemumi läh > eemal (>20 m)

N, P kõrgem tammel kui on ECM vs AM. Cenoc ei soe

ECM kolonisatsiooni mõjutab paiga ajalugu: sõltub seal varem kasvanud taimedest ja nende poolt mõjustatud mulla Abiootil

lab taime kasvu, eriti juurestiku arengut. Inokuleerides on kogu ECM kolonis suurem väiksemaseemnele on taim. Eri taimeliikidele eri seened efektiivsemad

nt on on parem kui ainuüksi Sclerodermat inokul. Kasu eelkõige juurestiku arengule

13C ülevaade glob: 13C fraktsioneerimine suurem troopikas ja eriti suurema vee kättesa

orfotüüpide arv väheneb koos juuretippude arvuga

Arvavad, et lagunemisega C-sisaldus suureneb ja seega mikroobid eraldavad edasiseks la juurtes vs lehtedes 15N: erinevatel taimedel +/- 1 promill - oluline

pat autokorr arvestada.

PAH ja klorineeritud yhendite biodegr vama (enamasti tugevam kui ECM

; leevendab veestressi (veepot keskpäeval positiivsem)

temperatuuridel

P. N mõju

omaga madalam lehe turgorkõrgem lehe osmotne potentsiaal  
ääsksem taimekasv+suurem toitainete kontsentratsioon

eval. Efekt polnud seotud parema taime toitumisega. Arv et suurenenud C-nõue Rhiz stimül taime fotosünteesi. Heb ja Rhiz suurendasid lehe osm pot. Te:

sisemus sureb. Eri ringide kokkupuutudes surevad mõlemad; suurte takistuste ületamisel fragmenteerub ja enam ei ühildu, sest külgakasv on min.

es ning EcM surnud juurt varjutamine ja girdling mõj erinevalt suhki varjutamine ja girdling mõj erinevalt suhkru rohkusele lehted

$^{14}\text{CO}_2$  liikumine ühest taime  $^{14}\text{CO}_2$  liikumine .

Suillus grevillei: sobiv peremees, ultrastruktuur ei lisatud  
Suillus grevillei: sobiv peremees, ultrastruktuur

Mullatüüpidel ECM kolonisatsioon ja ECM sõltuvus *Acacia holosericea* on väga erinevad. Vaid koguN mõjutat

14C liikumine noortes vs v 14C liikumine noortes vs vanadesse ECM vs non-ECM juuretippudesse  
hemitselluloosi>tselluloosi>okaste>humiinainete lagundamine ECMseente pool hemitselluloosi>tselluloosi>okaste>humiinainete lagundamine ECMseente

eritud: polüvinüül-laktofenool, säilitatud 4% glutaaraldehüüd

10 ECM seent pu 10 ECM seent puhaskultuuris kõrge vs madal C, orgaan

13355 bakteri sekvenssi

CO2 ja O3 vs peremees ja mulla horisont:: Mullakiht ja pereme

taime vanus

sisaldus taimes: ECM vs AM

anismid: geneetiline uniformus???, vertikaalne ülekand, parasitide rohkus, suured genotüübid???, filtreerimine e partnerite valik sobivuse j, kauplemine???,  
rius, *Peziza echinospora*, *endocarpoides*, *petersii*, *praetervisa*, *tenacella*, *violacea*, *Pulvinula archeri*, *Scutellinia* 3 spp, *Trichophaea abundans*). *Sphaerospora*  
t inh *Caloscypha fulgens*. Idandeid kahjustasid *Pyropyxis rubra*, *Rhizina undulata*, *Ascobolus carbonarius*. *Trichophaea abundans* ja *Anthracobia* spp inh ju

SIP mullas rikastatud tselluloosi lagundajatele. 12C domin kandseened; 13C domin pion

pH

NH4 ja NO3 radioaktiivsed

dis kuusk 100% C seenele, siis hiljem vaid tühi se - kuusk ja kask www: 13C net kuusk ja kask ww kuusk ja kask www: 13C netotransport vaid 2%, sellest  
hingamine; vs NH vs NH4; NO3

13C: mullaorg ja juurte CO2 13C: mullaorg ja juurte CO2 hingamise 13C mõjutab enim ilmastik 1-4 p  
N, P, K mõju Frankiale, N ülekand lepalt männile

delta C13 ei muutu kui mikroobidele sööta eric-ühendeid

aeg

15N fraksioneerimine eri taimedel erinev ning sõltub suuresti N-allikast ja mykoriissustasemest. Pohl s  
15N fraksioneerimine erinev eri seeneliikidel ja EcM vs erikoidse MR seentel. Erinevused kq substraal  
14C Rhododendron > Clavaria 14C Rhododendron 32P Clavaria > Rhododendron

respiratsioon vs eri pH

piisav aeg

14C, respiratsioon vs pH 14C, respiratsioon vs pH

N-saaste

mittesteriilse metsahuumuse ja n Tomentellopsis, Piloderma ja Paxillus on võimelised kasvama läbi mittesteriilse metsahuumuse ja nakatama mändi; Suillus p

15N mullas: erinevad mulläühendid on eri rikastatusega nii mullas kui ka taimekudedes,

urea kogunemine Terfezia viljakehadesse, nitraadi red

ECM

10b kiiremini

10a pinnasel parem taimekasv (kõrgus, diam) kui kontrollil ja VK tek rohkem

taime juurtest t taime juurtest tulev C indutseerib AM-seentes g

adunud, mis viitab nested muustrile; sığaval arv. C-limitatsioon

llalt erinev

15NH<sub>3</sub>-aminohapete mõõtmine taime eriosades

14C woodwidewebi uurimise 14C woodwidewebi uurimiseks

u C, ent saab vähe P

Suillus spp. Peremehe valik ja P, C ülekanne

lehis vs mänd: Su lehis vs mänd: Suillus spp. 32P ja 14C ülekanne. Mänd  
inkompatibiilne E inkompatibiilne ECM annab 2 -4 korda vähem C ja 50

eritutel Laccaria, Inocybe, un early vs late stage: vs mulla juurkontaktide läbilõikamine. Isoleerimata kase seemikutel Lact pubescens, L glyciosmus, Lecci

litroofilised netw;

kuu on ka seen, siis see lagundab ja hingab ning eritab seeläbi CO<sub>2</sub>. Kasvatasku meetod.

% akaatsial  
ida oli hoitud 6 kuud 18 kraadi juures

\*C juures pos

P: ECM tihiku kohta 3x parem kase kui AM vahtral

EcM seened reageerivad positiivselt biomassi tootlikkuse ja hingamisega  
enamus EcM seer enamus EcM seeni reageerivad positiivselt C/N vahe su

bulk mullas. Mükoriisas ja mükorisofääris rohkem 16S rDNA tüüpe (5 vs 2), parem P lahustamine, rohkem siderofoore, vähem HCN antibiootikumi (mü  
adga, pinnase auruga desinfit MHB doos, ECM doos  
konduktiivsus, harunemine ja kolonis,

erma aurantium, Tricholoma pessundatum) koloniseerisid kolbides mändi ja kuuske võrdselt hästi, ent kahtlustas, kas see nii ka looduses toimib.

atus,

lehekõdu lagundamine ja vee:



mu

Nitrifikatsioon mõjutab tugevasti pos d15N lehtedes ja lehed-muld. AM ja EcM puud sa

monokaartionid kasvavad kiiremini NO<sub>3</sub> ja NH<sub>4</sub>-rikast

15N puudel, puhmastel, rohunditel ja seentel. Lehtede tase sõltub positsioonist tüves, EcM seentes kõrg

15N korgem rohumaade mull 15N korgem rohu 15N korgem rohumaade mullas kui metsas; N konts Nf  
N, isotoobid N, isotoobid

vad lehtede kahjustusi. Taimede varuianete kas ja fotosünteesi regul puhverdavad  
herbivoorne stress vähendab

glükogeeni graanulid N ja P deponerimine sesoonselt

*Thelephora, Laccaria* omavad vedelkultuuris väga piiratud naftaleeni degradeeri *Thelephora, Laccaria* omavad vedelkultuuris väga piiratud naftaleeni degr

latestage: piisav hulk suhkrut, parajalt mineraalid latestage vs early: N, P vajadus liigiti, N/P

matsutake shiro

*T. matsutake*

isid läbi tanniniseerunud rakkestade, ent mingeid sümbiootilisi struktuure ei tekkinud. Taimed väga tugevas stressis ja paljud surid

<sup>13</sup>C: puidulagundaja seened on 4 promilli keskm rikastunud vrd puiduga; Kitiin on 2 promilli rikastunud

seened on palju tugevamad NO<sub>3</sub>-imejad kui taimed ma

mullaorgaanika ei koosne mitte niivõrd ligniinijääkidest, kui mükoriisete

, *Lact*, *Thelephora*, *Cenoc*, *Gyrodon*, *Haavel*. *Lact pubescens*, kase-spets *Leccinum* spp mood EcM koos rakusisese kolonisatsiooniga. *Alpova* ja *Rhizopogon* ja :

vätamine inhibeerib potis viljakohade teket

oluateerijatel > muudel; spetsialistide seas oli see rohkem evol konserveerunud.

spp. *Lact* sp paiguti suurendavad mändide kõrgust. Üldiselt vahet pole eostega ja mütseeliga inokuleerimisel; vahet eostega parem *L. delic.* Substraadina t

sisaldus CWDs vs eri mullahorisontides

juurte vertikalne jaotus: kuusk > pöök > tamm; samas toitainet

kõrgendatud CO<sub>2</sub> tihedus mullas suurem CO<sub>2</sub> hingamise tihedus; rohkem hütüfe, suurem CO<sub>2</sub> varieerimine N ülevõtt: CO<sub>2</sub> vs Laccaria vs Suillus

tantsiga

*Meliniomyces bicoloris* eraldatud isolaat ja 2 Mel variablis isolaati on suutelised taimest

13C ja 15N seentel: ylevaade 13C ja 15N seentel 13C ja 15N seentel: ylevaade

*Hygrocybe*, *Clavulina*, *Clavulinopsis*, *Clavaria*, *Trichoglossum*, *Geoglossum* on väga ma

nekasvule

inguteta alal v suured (>10 m populinum ja >6m scalpt) ja geneet erinevad genetiid. Aastane geneti kasv 0,35m. Scalpturatumil 2 erinevat isendite rühma, 1

areneb paremini steriliseeritud ECM areneb paremini steriliseeritud pinnasel

substraaditingimused

mõju ECM moodi mõju ECM moodustamisele laboris

söötmet välja jäetud

ooli hulka, ja tekitas tihedaid struktuure

N ühendite omastamine Hebeloma cyl poolt. Parimad C

ECM seened ei suuda tuhost .

, v üksikud Wilcoxina ja DSE; ebatsuuga, leesikas, kask ja paju suurimad  
> pookumine???

P: ECM seened ei suuda tuhost omastada

raiesmikul: juurkontakt, spooride eluvõime,

)

judel taimedel

15N: muld sõltub pms pos latituudist; lehed negatiivselt sademete hulgast; mulla ja lehte  
15N: EcM seentel kõrgem kui mullas, kübarates 1-2 promilli võrra kõrgem kui jalas, jalas sama mis mu  
EcM inokul ei muutnud tugevasti väetatud eukalüptil ülesvõetud d15N profiili, sest ARV  
15N Keenia savannides: eri taimed ei eristu; arv et vee kattesaadavus mõjutab oluliselt 15N rohkust ja r

[Redacted]

metallide sidumine

risti-koloniseerimine raskemetallide mõjul

P vs metallid

N03 ja NH4 sisaldus eri mullahorisontides

nitrogenaasi aktiivsus mädanevates eluspuudes: eriseen

isid erinevalt; eriviiside ja eripuuliked eri dominant seened

14C ligniini ja poly-koniferiit 14C ligniini ja poly-koniferiitalkoholi lagundamine ErM seentel tugev vn

Chosenia (Salicaceae) mood EcM ja vähe AM JPN-s. EcM rohkem kuival rähkpinnasel vrd niiske üleuj pinnaga. Salix sach  
kaseseemikute istutamine erimuldadele: igal mullal erinevad seened, mullal kus kaski polnud, ecM kolonisatsioon madalaim

ECM seente kasv palmitaadi, oleaadi, trioleiini, linooli ja linoleeni peal: v

ja Transp on er suur kui Casuarina on Frankia noodulitega ja ECM > ECM > kontroll. Kui on nii F  
15NO3 kandub 1 kuu jooksul üle märgistatud mändidel  
Pisolithus vahendab N liikumist Casuarina ja Eucalyptu  
N liikumine Eukalüptist kasuariini sõltub suurel määral

Pax invo: peremehe-spets ei sõltu krüpt liigist ega kultiveerimise ajast. Tõenäoliselt isolaadid looduses t

AM kolonisatsioon teelehel, aga mitte ECM kolonisatsioon kuusel ja pöögil, kõrgem suure taimede BD korral. Looduslikul  
ävitatud, vaid külvatud taimed peale

kasvu, MHB mitte (arv sest inokul peale ECM inokul). MHB kadus risosfäärist 4 a jooksul pea täielikult, Laccaria vähenes kõvasti. Bioloogiplaadid näita  
13C liigub eri ECM-seeneliik 13C liigub eri ECM-seeneliikidesse erinevalt: Piloderma tunduvalt väh  
def

14C: männil mullahingamine 14C: männil mullahingamine kulmin 26-60 h pärast söötmist. S  
ECM kolonisatsioon Cenococcumiga korrel taimede kasvu ja P o

13C ja 15N metaanalüüs toetab, et saproobid ja EM seened erinevad 13C ja 15N poolest. C erinevused  
15N fraktsioneerimine toimub seentes pms NH4+ ionide selektiivses või mitteselektiivses kasutamises

13C fraktsioneerimine saproo 13C fraktsioneerimine saproobidel soltub kasvufaasist: P1 -13C rikastumi

areng

N, P

NH4 ja NO3-le erinev, Al vältimiseks pH tõstmine. Mulda ka orgaanilised happed (pms 2-lisaelektaadid pms hapestavad mulda ATPaasidega, selleks et

Collembola: vähendab  
arefragmentidel

Seene kolonisatsioon vähendas lehe 15N 0.5-3.5 promilli, sõltuvalt kas nitraadist või amoniseeritud taimega, taimeosade, seene ja mükoriizaga. 15N: Suillus ja Thelephora mõjutavad erinevalt 15N akumuleerumist. Suillus ja Thelephora mõjutavad erinevalt d15N akumuleerumist.

15N Tundras: seened transportivad 15N vaeseid ühendeid taimesse ja ise rikastuvad 15N. 13C: kliimamuutuste CO2 13C: kliimamuutuste CO2 eksperimentides saproobid vaesustu 15N taimedes, mullas globaalselt, lokaalselt: ülevaade. NH4 v NO3 suht 15N muster sõltub

15N: EcM ja saproobid sama muustriga otse liustiku serval. Arv. Peremehe-spets liigid su saprootroofid vs ECM seened 13C ja 15N sisalduse erinevus

15N mullaprofiilis: EcM metsa mullas suurem vahe kui AM mullas - arv seened sügavale. 15N: viljakehades seletab jala ja kübara erinevusi hüdrofoobsusega: hüdrofoobsetel on suurem Saprootroofid saavad suure osa C-st otse agarist, mistõttu soovit kasutada vedelkultuuri. K

14C: arvavad, et Ootidea on ECM, Ramaria, Clavulina saprootroofid 14C põhjal. Sowerbyella puhul psee 13C ja 15N: ektomükoriisuse tuvastamine, levik seentes, taimedes

14C põhjal ligniini ei kasuta seened energiaallikaks, vaid lagundavad selleks, et tsellulool 15N ja 13C diskrimineerimine eri metaboolsetes protsessides: ülevaade

Koguprimaarproduktioonist läheb taimedel maa-alla 27-68%, seentesse 1

15N: kuuse väga suur 15N varieeruvus sõltub arv kasvukohast ja sõltuvusest EcM sümbioosist madalad 15N väärtused EcM seentel näitavad arv võimet lagund proteiine; isotoobimuustrid arktika taim

15N ja 13C toiduahelates. 15N ülespoole rohkem keskm 3.8 promilli, 13C rikastumine vaid 2-1 esimese

õltuvalt taime funktsionaalsest rühmast, mittesteriilsetes tingimustes ja kompleksse inokulumi korral. MR tüüp, seeneperek mõju väi

a kasvuga ECM seente biodiversiteeti võib ülal hoida juurte "teadlik" selektiivne suretamine juhul kui ECM seened on erineva konkur

Rhizopogoni liigid ja männiliigid Californias ei ole spetsiifilised allo- ja sünpatrilisuse seisukohast; Inokul mändide kasv kiir

mineraalide lagundamine E-horisseenehüüfide poolt on suurem madalama mullatoinete sisaldal mineraalide lagundamine E-horisseenehüüfide poolt on kivimiproovid seenehyüfidega. Erivanused. Mida vanemad, seda rohkem hüüfe.

14C-ligniini (DHP) 14C-ligniini (DHP)

seened eelistavad happelist pinda kõrge C/N suhtega. Seega, nii pH kui ka C/N suhe otseselt mõj mikroobide osakaalu

Korupis ja Zambias EcM ja AM puud ei erine 15N poolest. Uapaca lehestikus 15N väiks 15N diskrimineerimine soltub N kogusest. Risomorfid rikastuvad 15N rohkem kui puud. Mida suurem delta 15N palju suurem seenmantlis kui mittemikoriises juures; suurem kui mullas; sügavuti kasvab 15N Euroopa metsades, vs N vaetamine; vaetamata aldel tugev 15N kyllastumine sygavamal mullas. K 75% juurtesse saadetud süsinikust hingatakse ise või sümbiontide kaasabi vool mulda lakkab puude koorimisel

viljakehade ja puude 13C sisaldus

N2 fikseerimine Tansaania: indikaator 15N

15N taimede AM vs ECM staatus hindamiseks. Frankia ei tee vahet

15N fraktsioneerimine mullas, seentes ja taimedes. Frakts er  $NH_4 > NH_3$ ,  $NH_4$  lendumine, nitrifikatsioon

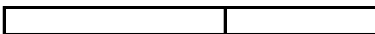

ökidel: eri-isolaadid koloniseerivad tamme ja pööki; 10st inokulandist vaid üks koloniseerib; ECM langeb kokku viljakehadega; kasvuhoonest avamaale is

Pisolithus-eukalüpti mikoriisa tekib kunsttingimustes 4 päevaga, alates mantlist ning juuretippu juuremütsist terved (mitte aga lõigatud) juuretippu eritavad keemilisi ühendeid, mis stimuleerivad vaid sobivate ECM-seente kasvu nende



ilt. Arv sõltub elupaiga heterogeensusest

mõj. Skaala bakteritele liiga suur

njug kui lod valiku teel; väike väljasuremus arv, OTU ja liigidefin  
opogoni poolt kontamin. EmH hulk on hea proxy hindamaks EcM kolonis. Samas võitlus seente vahel käib pigem juuretippude pärast.

u genetiit. Indiviidid 2 m raadiuses olid geneetiliselt sarnasemad kui juhusl.;

doosiefekt

pH muutumine optimaalsuse suunas

eglane väljakaevatud ja ümberistutatud taimedel. Looduslikus kohas kõikjal ymber paju. Lepa juures ei kasva. Leiavad, et Pyrolate hea kasv pea täielikus v

varase staadiumi seemned nakatavad perem taimi ilma lisa Glc sootmes, samas kui hilise st saaned tahavad lisa-Glc ja sel juh

ülevaade 13C ja 15N: taimedes CO<sub>2</sub> diskriminatsioon Rubisco, mõj õhulõhede juhtivus, a

2M juuri ja tüüpe rohkem)

öödudes, ent 1 aasta pärast vilets. II staadiumi seentel juba kuuga idanemine kehv ja aasta pärast ei idanenud enam. Arv, et suurte pi

e ja n-butüraat, aga mitte teised sarnased Tricholoma liigid. Neil ei indutseeri idanemist ka sama liigi mütsel

N fikseerimise geenid ja geeniekspressioon Suillus vari

oopiski

Cenococcumi respiratsioon ECMst madalatel veepotentsiaalidel kõrgem k

kelaatimine, metallide kahjutustamine, hapestamine

13C kandub juurtes vaid 13C kandub juurtes vaid 4-5 meetri kaugusele puutüvest; kaug

teoreetiline taime kasu vaatenurgast x x

oksalladi jt orgaaniliste hapete roll mullas: liiga madal kontsentratsioon la  
raiesmik vs mets.ülevaade  
väga sarnane segametsas ebatsuugal suurem ECM BD  
32P sisaldus ECM taimedes suurem vrd non-M 32P sisaldus ECM taimedes suurem vrd non-MR taime  
hkem), P omastamine kiirenes, ECM seentel rohkem EMH (tugev korrelatsioon P omastamisega)  
15N: EcM seeneliikidel v erinev N-ühendite ülesvõtmisvõime - suurem (Wilcoxina) või  
mphinema = DSE = kontroll Wilcoxina koloniseeritud kuuse seemikute 15N Wilcoxina koloniseeritud kuuse seemikute 15N omasta

viletsam vrd kontrolliga, varis inh ka collembolate arvukust, ent mitte lestade arvukust,  
l eripuudel, seeneliikide individuaalne mõju väga erinev, koosmõju ennustamatu

P vs pH

areng, suhkrud

termiidid valivad ränimineraale oma kodade ehituseks r

lul liigirikkus inhibeeris v polnud oluline. Arv et antagonistlikud interakts domin liigirikkas keskkonnas kus tüved on geneet sarnase

OrM: Cephalanthera damasonium rohelised vs ;OrM: Cephalanthera damasonium rohelised vs albiinod

N2 fikseerimine suurem org-mullas kui min-mullas. Eriti

eksudeerivad nii juured kui AMF hüüfid. Osakaalu raske hinnata  
; bakterid ja sapor seeni girdl ei mõj; tsellulaaside ja proteaaside tippakt on sügisel, mis korral juurte ja lehtede suremusega; girdl väl

**Thelephora terrestris** mõju on eri Pinus contorta semneperekondadele erinev nii taimede biomassi kui Ec!  
lonis. Eriti tugev efekt ebatsungal, eukalüptil, tammel. Inokul efekt suurem, mida lühem katse. Publikatsioonide 'bias'

ikt. Ühel tüvel 3-4 indiviidi, Estimate S järgi 1 lisaks

atsetaadiga

orgaaniliste ja anorgaaniliste ainete omastamine ECM s

a mikrobikooslusi

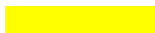

a saproobsuse jada

le

15N lehtedes Mt Kinabalu: madalas (700 m) madalam kui kõrgel 1700-3100), lehtedes j:

Laccaria bicolor tapab collembolaid ja transpordib 15N

EcM matid suurendavad mikroobide biomassi ja mitme ensüümi aktiivsust mattides, ent erinevusi pole kui kaaluda mikroobse biom

13C: saproobidel fraktsioneerimine pehmemäd <valgemäd>pruunmäd. Arv. Erinevused tulenevad vana  
13C ja 15N diskriminatsioon eristab ECM seeni ja saprooote (+3.5 vs puit); vs lehed vs kõdu, muld; r

lagundamine ECM seentel arv fakultatiivne. Ei tohiks ranget va

ECM kolonisatsioon väheneb kõigil seentel männiokaste lisamisel

ECM seened pidurdavad okaste lagunemist, sest tombavad ära vett, mis omakorda tingib lagundamise aeglustumise  
leid neid interaktsioone. Positiivsed on kahtlased, sest võivad tuleneda seente geneti ülekatuvusest: plotte 80 ja igast ca 6 proovi; bonferroni ei kasut!!!

1986 (Tomentelloidid)

† Sarcosomataceae ja Agaricales

%koloniseeritud; väheneb suurlinna läheduses, korreleerub okkakahjustustega

noodustamine kui eostega viljakehast (20-33%)

eed ühised paljudel liikidel;

N sisaldub Cenococumi vakuoolides oluliselt rohkem

Xerocomus badius-mantel väga mikro- ja makroelemen

15N: produktiivsuse gradiendil erinevate mükoriisatüüpidega taimed käituvad erinevalt.

oma liigirikkusega istikud raiesmikult peale ümberistutamist

raies-juurekontaktiga puudel suurim ECM diversiteet, ent väikseim kasv

www: arv noored taimed ei saa suurtelt puudelt märkimisväärselt C, mis ü

1

Quercus robur -Piloderma fallax: tamme transkriptid vahetult enne ECM mood: ca 50 ülesregul, mfg

Suillus variegatus ja mänd erinevad oma substraati eritatavate ainete poole:

produktiivsusega; See kui palju variatsiooni meetod katab, ei näita meetodi headust;

puud, mõni seen peab vastu 9 kuud +4C juures

puu, käbide teket, ECM seente viljakohade prod, tuberk ECM osakaalu (mitte oluliselt), samaks jäi ECM kolonisatsioon, juurte kasv, ergosterooli sisaldus

vajab ilmselt vähem C kui Lactarius

puumite ühele harule (siiski Thanatephoruse sees); mõningate eranditega ITS filogenees toetab AGsid

koloniseeris pigem nõrgestatud taimi

15N eristab troofilisi tasemeid Calif estuaari ja laguuni soolasoodes. Mixing mudeli põhjal hindavad me

ektendoMR puhul MR teke algab Hartigi võrgustikust, ka pikkjuurtel on rakusis kolonis. Mükoriisa teke männil vs kuusel 1  
ga  
ud alasid, metsataimlaid, väet Paxillus involutus: tüüpiline ruderaal. Kolonis. Ka Paxillus involutus Paxillus involutus: tüüpiline ruderaal. Kolonis. Kaevatu

tes EcM%le; mida rohkem eoseid (10e9) seda parem EcM%; parim on eosed ja seemned korraga mulda panna, P vaetamine 40 kg/ha parem kui mittevaa  
tes (poolsteriilselt klamüdos p parem); mida rohkem eoseid (10e9) seda parem taime kasvule; parim on eosed ja seemned korraga mulda panna

nid erinevad üksteisest tugevasti taime transpiratsiooni reguleerijatena, õhulõhede juhtivuse muutjatena ning abina põuast taastumisel. 9 10st olid paremal  
nid erinevad üksteisest tugevasti taime hüdraulilise juhtivuse ja risosfääri veepotentsiaali reguleerijatena ning abina põuast taastumisel. 10 10st olid parem  
seenetiviil \*seenetivi2\*taimeliik

C liikumine viljakehadesse se .

C liikumine viljak .

ste levitaja, läbides päeval 1 k mükofagne kukkurrott sööb pms Mesophellia, Zelleromycese ja Labyrinthomycese eoseid. Eosed idanevad ja mood EcM va

ele

ECM kolonisatsioon m-1ja biomass taMMEL suu ECM kolonisatsioon m-1ja biomass taMMEL suurem kõrge CO2 korral, .

oksalaat: mõõtmir oksalaat: mõõtmine; Paxillus toodab eriti NO3 ja väike  
H14CO3->oksalaat

ECM vs AM: piisav taime vanus: suktsessioon



Paxilluse üks tüvi, mis on mükoriisne, erineb genoomi ja ITS poolest väga vähe kahest teisest tüübist, ometi on transkriptioo

saprotroofid vs ECMseened: saprotroofid vs Et saprotroofid vs ECMseened: roll looduses, ensüümid, k  
14CO2 taimest seende vs sa<sup>14</sup>CO2 taimest seende vs saprotroofi manulus; vs kõdulaiikude koloniseer

Monotropa hypopitys vajab idanemiseks vanade taime lähedust või paju lähedust, sest assots Tricholoma cingulatum ja T  
ErM seened jm kr ErM seened jm kottseened lagundavad kitini palju pare

samblike mineraalide lagundamine - arv oluline roll algs

kõrged väetise konts ei võimalda dipterokarpidel EcM moodustada Ca: EcM kolonis parandab dipterokarpide seemikutel e

Rhizopogon + ebatsuga -N2 fikseeriv Bacillus eriti tu

al. Enamasti genetite suurus <3 m. Vkke all alati sama geneti EcM tipud. EcM tipud kuni 40 cm Vkdest eemal. Üks genet kolonis kuni 7 peremeespuu ju

koos voi ilma seenega. Vaid MRA& suutis idandada moned seemned. Kui idanemine toimus, siis sporaadiliselt

18O: seente veiljakehade veemajandus: kuivaperioodil vesi tuleb kas otse risomorfide ka

Tom subl domineerima. Rhizopogon püsis kauem kui substraati väetati oravapabulatega. Taimetoidainete rohkus mõj seente konkurentsi. nist vitaalsus väheneb tublisti; EcM mood võime säilib peale seedekulgla läbimist

ineraal-N rikkamal pinnasel kasvab seen, seda jõuab ECM seente 15N korreleerut ECM seente 13C ECM seente 13C korreleerub seente N-ühendite kasutu

P edasi-tagasi liikumine, transport ühest kolonisatsioon

32P: Suillus vs Hypholoma; vs inokulumi suuru 32P: Suillus vs Hypholoma; vs inokulumi suurus

P ülekanne

ECM vs sapro toi ECM vs sapro toitainete liikumine ja aineringe: ülevaad

mullaseened; vs girdling, SWE: EcM seened asenduvad Helotia

ECM seened võimaldavad kobresia myosuroides-I üles

ontr rauakaevanduses; kasv Complexipes, Pisolithus >Suillus > Phialophora, kontr

fungitsiidid, AM inhibitsioon

paju ja Populus deltoides: Looduses EcM domin mooduka niiskuse juures, AM domin kuivemates ja niisk  
seentes on väga palju toitained vrd muu mullaga Puerto

Shorea parvifolia ECM ja ekstendoMR on mõl sagedased EEMR on kaugematel juureotstel, õhukese mantli ja tugeva rakusi

AM diversiteet suurem seal kus suurem taimede primaar

EcM kolonis ei korrel massiga.

Populus 3 spp: vs CO2 tõus: liigiti erinevad EcM, Populus 3 spp: vs CO2 tõus: liigiti erinevad EcM, AM ja juurte prod muu

aga, teised mitte. Vahevormid. Eelnev uurimus männiga sai samadel seenetüvedel erinevaid tulemusi

N tuhas

EcM kolonis suurim 18 kg/ha P korral.

EcM kolonis suurim 18 kg/ha P korral.

sobiv peremees

mittesobival peremehel akumul tanniinid ja mantel õhuke ning hüüfid lüüisuvad

Phytophthora cinnamomi muldadel Eucalyptus marginatal tek vähem EcM kui norm-mullal; E. Calophylla -vahet pole. Liiva

ensümbiondid saavad see EcM evolutsioon: arv, et EcM on tek saproobidest mitmeid kordi iseseisvalt. Ei ole kodustatud parasiidid.

bruche

Tuber: mulla desinfekteerimine

RT-PCR bakteritele, mille fenoolne substraat oli rikastatud 13C-ga; gradi

juurte ergost sisald ja "paksu mantliga ECM kolonis väheneb kui taime lehed ära kitkuda. Seos aastasisene. Eelmise aasta k

13C: puuvoorik saab kadaka: 13C: puuvoorik saab kadakast 61 protsenti oma süsinikust

signaalmolekulid risosfääris signaalsatsioon, sümbioosi aktivatsioon, regulatsioon ECM vs taim

15N temp vs troop: troopikas (v.a. BRA cmpinades) 15N rohkem lehtedes ja mullas, mis

ECM teke väiksem kui taimel suur N,P, vähe C

e vaid sisetingimustes, mitte kasvuhoones;

mulumivõimalused

substraat, sööde

d juuretükidega; õnnestus potis eluspuu juurtel

saured stimuleerivad

patogeenidest vabanemine

mullaniiskus: eriiliigid käituvad erinevalt

P erinev mõju eritüüpidele

N, P kombinatsioonide mõju 2 ECM liigi kolonisatsioon

P erinev mõju eritüüpidele

sobiv peremees

peremehe valik, õige peremehe lähedus

iaal liikide osas

õige peremees või õige peremehe kohalolek juhuperemehe koloniseerimisel

s laiemalt levinud. Crisp2004 fütoendeempiirk-des endeemseid seeni pole teada. Ülemere Euk istandustes palju uusi patogeene, ent EcM seened tulevad p

Gloaalne metaanalüüs EcM vs saproobid: mõlemil on  $^{13}C$  muster seotud eelkõige laius  
15N Alaskas: Lehtede N sõltus mulla orgN-st; 15N lehtedes üldisest fertiilsusest. Hüüfid  
pH  
des eri efektiivsusega kohalikke seeni. Rohkem nakatuvad kontr ja Pisolithus, eriti männimetsas vs ster, mittester põllumaj, põletatud paigus. Kohalikud se  
/alther,1994). Mitu uut kandid-divisjoni

kuga  
is elasid seenevahetuse üle vaid suurimad isendid

Pinus edulis Arizonas: 5 liiki Geopora-sarn seeni. Arv see tuleneb v põuasest aastast. AM taimede eemaldamine suurendas  
Salix, Betula > Corallorhiza

Alnus glutinosa kannatab palju paremini üleujutamist kui kask; ei kasva happelisel turvasel, kus ei mood ka aktinoriisa

mida suurem on EcM kolonis, seda efektiivsem 32P yle

colonis.

nii EcM seente kui saproobide kasvu

mükoriisa teke: mänd paljasjuursed > plastpotid >> kasvuhoone; kuusel polüetüleen rullid > plastpotid > paljasjuursed

15N proports tundra ökosüsteemis: seened=MitteMR>EcM>ErM taimed; Arv et N fraksion toimub N

nestunud (sh Phialocephala, Phallales sp). Domin Helotiales, Hymenoscyphus. Dominantliik kattuv; üks genet kattuv

peale põletamist taimekasv kiirem, ent mükoriisa teke aeglasem. Juuretippe rohk, ent kolonis madalam.

; nat mullaga inokul MR moo Wilcoxinale parem turvas-vermikuliit-MMN kui Petri tassi agarsööde

gmäestikes puud ei kasva ilma inokuleerimata

peremees, inokuaadi hulk, muld

ECM vs väetamine

ista nuda, personata,nebularis,inversa, Hygrophoropsis aurantiaca, Leucocort (Cortinellus) bulbiger, Lepiota clypeolaria, Cystoderma

nine isoleerimiseks

peremees, temperatuur, nõu, substraat, sööde

Rhizopogon nakatab monda leesikat või maasikapuud vaid kokultuuris pärisperemehaga(männiga, aga mitte ebatsugaga)

sobiv peremees

sobiv peremees

sobiv peremees

sisaldus taimes; vs veestress



N: EcM-s ja EMH-s erinev N-ühendite konts. (EMH-s

peale pouda palju kiirem taastumine  
ldkannil

mentel või seotud bakterite ja saproobidel? hea disain. Kas talv ja kevad käituvad pidevalt nii?

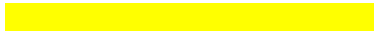

iteeritud puudel, sest need on stressi all (ka muud stressorid Arizonas -herbiv, konkurents,

peremehe kaitsemehhanismide, sh peroksidaaside mahasurumine

ja suuremaid geneiteid tuvastati läbi 2 aasta

id on vanadest geneetiliselt üsna erinevad. Arv, et matsutake levikul on eostel väga suur roll

15N proports tundra ökosysteemis: MitteMR>EcM>ErM taimed; 15N hulk suureneb mullas sügavuti; /

kolonis suurem puudele lähemal kui kaugemal  
te kasvatatud ja hiljem viidi laial alal kontakti

Hebeloma spp, Russula spp, Inocybe lacera, Scleroderma

ülevaade: ECM C transport. Mitmetel ECM seentel puuduvad C importer

DothideaM. Lisaks v palju EcM-seeni nii lehtedelt kui mullast, Sebacia verifera

teke kasel ja tammel <3 näd peale idanemist, potis, kus juurkontakti pole -5-6 näd.

N väetamine stimul Paxilluse kasel ja Scleroderma tam

inokulaati

T. tridentinum

kuivamisel kasvab kiiresti vaid trehaloosi kontsentratsioon, külmas kasvat

tel lisa-pos-efekt taimedele, ent TIBA inhibeeris ECM teket

e juurte biomassiga; AM prod suurim kõrgete rohundite juurres rikkal pinnasel

ErM+ECM biomass suureneb lokaalsel toitainete gradi

U, Abarenkov K. 2014. Improving ITS sequence data for identification of plant pathogenic fungi. Fung. Div. 67: 11-19.

15N : urea ja NH<sub>4</sub>NO<sub>3</sub> vaetamisel erinevus taime 15Ns (ureaga suurem); Mittevaetatud alal 15N suu

d suutsid lagundada tsellobioosi ja lihheniini ainult siis kui lisa-glük Tricholomataceae: Lyophyllum fumosum (arv fakult ja ka ekter

ARG sissetoodud metssead ja hirved levitavad mändidega sissetoodud seeni ja soodust seega invasiooni

bakterid

Nfix-sümbiondid

ECM vs AM: EMECM vs AM: EMH ehitus, RM, transport, sink, source

sobivus bakteritele: eri substraadid, eriseened, eksudaadid

ECM seente kasv ja mõju bakteritele

sõltuvalt seemiku kaugusest emapuust-oluline

a EcM seemed ei kattu. Arv et EcM tsesalpidel mullale spets pole eriti oluline, sest tulemused erin Newbery omast. Gnetu afr mood EcM vaid Sclerod sinn

Aminohapete  $^{15}N$  varieerub 20 promilli ulatuses, ent on erinev eri kudedes ja eri mullas

Pseudotsuga istutatud raiesmikule eri kaugusele puudest: kaugus mõjutab % kol ja liigirikkkust

15N: diskrimineerimine erinevates biol, biokeem protsessides; taimekoed on muutustele  
15N lehtedes: üle kontinentide positiivne seotud nitrifikatsiooniga ja N depositsiooniga; arv. I

Paxilluse puhaskultuur eraldab vermikuliidid NH<sub>4</sub> ja Ca

Paxilluse puhaskultuur eraldab vermikuliidid NH<sub>4</sub> ja C

opt temp 18-24kraadi, 29 väga halb

varise lisamine suurendas EcM kolonis vaid siis kui muu muld oli steriliseeritud. Muidu sama. Varise lisamine soodustas ka:  
n, Amanita, Lactarius deliciosus süntees ebatsugaal jt okaspuudel, sh Lyophyllum, Suillus, Rhizopogon, Amanita, Lactarius deliciosus moodustavad ka ebats  
inevad meetodid. Mütseelilah Lactarius deliciosus > L sanguifluus: Pinus pinaster > P sylvestris. Erinevad meetodid. Mütseelilahusega inokul kasvukoone

CO<sub>2</sub> mõju diversiteedile ja liigirikkusele ei olnud, ent mida suurem N min

EmH vs EcM; vs EmH vs EcM; vs CO<sub>2</sub>, N väet: dominandid ja koosluse

ECM aitab männil vrd hirsiga paremini P omistada

e vähendamine, eriti preerias vrd metsas

Hyster clathroides, Elaph granul, Gymnopus dryophilus, ocior, Clitopilus prunulus, Boletus 3spp ei mood EcM Pinus pinastriga

sisaldus

lehekõdu N, P muutus

ECM seened omastavad oietolmust ligi 80 -90% N, P  
ECM seened omastavad surnud nematoodidest ligi 2/3  
N,P, mõõtmismeetodid, omastamine lehekõdust

ECM Hebelomaga nakatatud pinnases on Pythiumi nakatumisvõime väiksem

koos teiste mullaorganismide, metsamulla tarimine istutusala

ECM-ta. Eriti homogeensel pinnasel. Varjutatud nulusse topimus ühesuunaline 14C kanne ebatsugaal.

generalistid ECM-seened leevendavad taimevahelist võitlust segakultuuris

e (palju aeglasem ja vähem efektiivne)

Mixing mudelid: Kahe isotoobiga ja 3 toiduallikaga mu

Mixing mudelid: Kahe isotoobiga ja 3 toiduallikaga mu

Mixing mudelid: Kahe isotoobiga ja 3 toiduallikaga mu

EcM taimed vs AM taimed: EcM taimede risodfääris palju suuremad erin vs bulk soiliga kui AM taimede risosf: eriti N miner pot, fosfataaside aktiivsus. l

ka mullatüübist - arv et puude genotüübid ja mulla-heterogeensus tagab mikro-koevutsiooni

ris kuusejuuri endof. Kõik seened suutsid lagundada turbasammalt, eriti O. maiuse isolaadid.

jõeäärse haavikus: AM kolonis max 5-10 a metsas, EcM alates 10-20 a. Arv et haava lehtede keemial allelopaatiline efekt .

obasidium vs Ericales; soovit uurida Arillastrumi EcM.

Geenid, mis kodeerivad EcM teket on Tuberial ja Laccarial üsna erinevad. EcM seened on minetanud ensüt

geenide aktivatsiooni uurimine

MHB mõju <sup>13</sup>C ja <sup>15</sup>N toiduahelas mullas: d<sup>13</sup>C sama, d<sup>15</sup>N kasvab ahelas ylespoole; kõik soltub vaga palju koh

Ceratobasidiumid stimul suremust

<sup>15</sup>N, <sup>13</sup>C jt: stabiilsed isotoobid on võimsad riistad uurimaks troofilist positsiooni ja C liikumist toidual

<sup>13</sup>C: Hemiparasiit *Striga spp* <sup>13</sup>C: Hemiparasiit *Striga spp* saavad 28-35 protsenti C oma peremehelt



fluorestseerimine fluorestseerimine hindamiseks vitaalsust

l tulemusi. Olulised interaktsioonid.

söötme kogus sõltuvalt aastaajast ja taimesuurusest: eksponentsiaalrežiim

väetamine

eksponentsiaalne vs normaalne väetamine; seentekasv,

substraadi rikastamine  $^{13}\text{C}$ -ga,  $^{13}\text{C}$  inkorporatsioon DNAsse, raskusgradientfuugimine, spetsiifiliste

$^{13}\text{C}$  kasutamine mikroobide  $^{13}\text{C}$  kasutamine mikroobide funktsionaalsetes uuringutes

hti väljaspooli andmebaasides olevaid: spetsiifilisus? intron? artefakt?

lab mikroelementide ülevõttu üh/taim; mitte üh/g taim

AM inokuleerimine parandab oluliselt India puude kasv

hapestumine, mitte AB tootmine

a, kasvu stimulaatorid võivad samalt liigilt isol seen

b tsellulaarne ja ligninolüütiline aktiivsus, mistõttu arv. Et õige EcM seene ei sa: ekto- ja erikoidse l ekto- ja erikoidse MR seentel oluline roll tundra- ja bore

seenmantli mood on vaja hapnikku, thigmotroopse seenmantli mood on vaja hapnikku, thigmotroopse asja olemasolu (silikoc

N, P omastamine: ylevaade

MR olemasolu obliigaatne

Casuarinaceae: EcM ja noodulite teke sõltub v palju Casuarina ja Allocasuarina liigist ning mullaomadustest. Allocasuarinal Põhja-AUS: eukalüpti hõredad metsad: basaalpinnalt domin EcM puud, juurte 24-55% EcM kolonis ja 6-22% AM kolonis.

varise tüüp mõjutab EcM mood: Banksia lehekõdul ei mood, ent eukalüpti ja akaatsia kõdul moodustab. Cenoc ja Hysterang

raldi või kontroll. Parem igal juhul steriliseeritud agropinnasel. Koinokulatsioon algul põhjustas tohutu juurtesüsteemi arengu

peremeest tapmata; Gerronema parasiteerib laanikul ja maksasambla Blasia risoididel

sed liigid; ruderaalsedel väikeseseemnelistel puudel algne kasv aeglasem, ent peale seemne-toiduvarede kasutamist palju kiirem kui suureseemnelistel puud

haskult vs kontroll vs mitme puhaskult korraga inokul. Suremus suurim kontrollil ja Pisolithusel

pH muutumine

glomaliin varieerub mikrosaitides ja ka taimede poolt asustatud vs asustar

taimed, mükoriisaseened vs globaalsed muutused: ülevaade

piisav hulk mütseeli

d, seega arv Russula sp levib eostega

transport seente vahendusel taimest taime kahtluse all sest liiga palju on h  
15N: diskrimineerimine eri N ühendite transformatsioonil; mida vähem on sademeid, sec

juurte DSE

mükorisofääri organismide roll bioremediatsioonis, võimalused, GMod, taimede juurde toomine

trentsimine vähendab EcM seente VK produktsiooni. Lactarius

taime ja seene genotüübid

EMH kasv on jõudsam E-hor EMH kasv on jõudsam E-horisoni mullas kui turbas, samuti läheb E-horiseened eelistavad kasvada ja sünteesivad oksalaati erimineraalidele eriintensi eriseened eelistavad kasvada ja sünteesivad oksalaati er

ks; eostega inokuleeritud taimedel tuvastatakse pms vaid üht MAT-tüüpi trühvleid, ilmselt teist (isast) on v vähe nii et ei tuvastatagi;

IAA eraldamine, juure morfol IAA aktiivsus (puhaskultuuris)

saproobsed kottseened fraktsioneerivad 13C nii liigispetsiifiliselt kui C3 ja C4 substraadispetsiifiliselt. I

pöögi ECM palju mineraalainete rikkam kui männi ECM

c vs CO2

allast või mõnel liigil on ka säärane mitteobli EcM eluviis.

R. EcM seened ei takist paras Melampyrum oli palju parema kasvuga ja reprod mykoriissetel mandidel kui mitte-MR. EcM seened ei takist parasidiga nal

agarsöötme muutmine happelisemas või aluselisesemaks

tion=vaik=NO<sub>3</sub> söötmetel. N-ühendite kasutamine polnud seotud kasvukoha N ühenditega. Membri ECM seened kasvavad reeglina palju paremini NH<sub>4</sub>>gl  
V-Am disjunktid tek samuti arv üle Thulea silla, ent NE-Am surid välja

taceae, Russulaceae, Sclerodermataceae, Euagarics. Paljudel sünteesitud ka EcM puhaskult

KK hapestub, antibiootikumid

15N sisaldus kasvab mulla toiduahelas ylespoole (3-5 lyli). Sama liigi d15N muster oli sama eri mullah

guaanosaarel taimed omast efektiivselt kusihalet ja ammooniumi. Taimedel üsna erinev  
15N: seentel, mis isoleeritud vihmametsast või savannist, polnud vahet puhaskultuuri 15  
15N Austraalia konnumaal: mitteMR taimed tunduvalt rohkem 15N kui EcM, ErM ja AM taimed; MR  
AUS niiskes põõsastikus (wallum) mükoriissetel taimedel ja NM-taimedel erinev 15N si;  
15N on AM ja EcM taimedel AUS savannis ja mussoonimetsas erinev. Mussoonimetsas l

nii infektsioonis kui vastureaktsioonis. Kontiinum teiste eluvormidega nii evol. kui ontogen.

13C ja 15N: 47-67 protsenti 13C ja 15N: 47-6 13C ja 15N: 47-67 protsenti Cst puuvoorikutes tuleb pe

ist peremehe kasvu, võivad stimul invas taimede invasiivsust, er männid a eukal. Sama liigi uued genotüübid võivad kohalikud välja tõrjuda või geneet mo

imedel. Suurimad taimed siis kui EcM ja väetist ei pandud.

Hygrophoraceae: teised peale Hygrophoruse on arv biotroofid tundmatute partneritega. K

ECM mõju patogeenidele

N: pigmentide teke  
puudevaheline üle N: B-fix  
N

mulla mesofauna parandab, sõltuvalt f-n grupist taimekasvu ning N-sisaldust ECM-seente puudumisel, aga mitte kohalolekul. Nii ECM-seened kui mesofa

Pisonia grandis mükobiendi kasv eri N allikaga söötme

puu vanus: Tuber

pood ei mõjutand ECM kooslust ega ka ergost hulka, ent keskmiselt suu

aljud saproobid nagu Fomes foment võivad olla pikka aega latentsed endofüüdid. Arv. et teatud endof arvukuse saavutamine ühõhjust

C transport: ülevaade; seisoonselt võib suund olla erinev; kevadel PsTsuga -> Betula, suv

13C ülevaade Betula>Pseudotsuga 13C ülevaade Betula>Pseudotsuga metsamullal

13C vs 14C; www transport 13C vs 14C; www N mõõtmine

ülevaade ECM se ülevaade ECM seente mineraal-ja C-toitumisest, WWW

14C, 13C netoliikumine kase 14C, 13C netoliikumine kasest ebatsugasse, eriti 3 vs 2 aastal, eriti kui e ebatsuga istikutel metsas, vs trenched mullas. Kontrollis BD, liigirikkus, ühtlus suuremad, rohkem RM-tüüpe, taime foto

sinnamrense; Gnetum, arv ka teistel puudel)

isilia -Neea, Guapira: Russ puiggarii; Nothofaguse metsad seenerikkad. Ei kattu üldse Alnuse ega Salixi seenestikuga. Subalp Nothof metsades seeni palju

nibeeris hübridisatsiooni tugevasti vt>

N, P omastamine; Pseudotsuga vs Calamagrostis; vs Al

kanarbikulistel puude lähedus

o on vähem efektiivne taimekasvu stimul ja P seisukohalt. P omastamine ei seostu 5kolonis, kasvu eri AM-seened tekitavad eri taimedel kas Arum või Par

ae ja Pinaceae juurte lisamine Dipterokarbid: poolvarjus kasvavad seemikud kõige paremini. Fagaceae ja Pinaceae juurte lisamine ei nakatanud seemikuid



sest erinevad eriokaspuude idanemiseks ja kasvuks, moni neist sammaldest kasvab CWDI

AM tipuhüüfide eluiga 5-6 päeva, jooksevhüüfidel pikem. 14C järgi. 14C

[Redacted]

avad juurte teket; lehisel pole suurt vahet  
n olid viletsad. Head tulemused ka 1 -10 ym IBAGA

N vs pigmendid

Hebeloma, Laccaria, Thelephora mood ECM ka vee all olevatel juurtel, Suillus spp mitte. Samas olemasoleva ECM ülejutt

Paxillusega

mikrosente mitteosalus laborikatsetes

Suillus bovinus: võimaline absorbeerima hüüfidega Rb, suhkruid, polüoole, glut Suillus bovinus: v Suillus bovinus: võimaline absorbeerima hüüfidega Rb,

sademetev erinev mõji %ECMle liiva- ja tuhapinnasel (?)

põuakahj ALADE puudel madalam liigirikkus, diversiteet ja ECM kolonis kui põua poolt mittekahj ALADE puudel. ECM k

peremeestaime geneetika

Orgaanilise kompleksi lagundamine EcM seente poolt: 3 hüpoteesi

N, P defitsiit

ihvris  
ltiveerida otse ECMst

väetamise, lupjamise mõju

13C, 15N erinev saprotroofidel ja ECM seentel; erin aastaajati, paiguti, aastati, liikide vahel, perek vahel  
Gly ylesvott eri seentel erinev Gly ylesvott eri seentel erinev, eriti hea Suillus spp-l; 13C transport juurte  
D15N: sarnane aminohapetes ja valkudes ning v erinev kitiinis EcM seentel; Erinevused viljakeha 15N

13C erinevusi substraatides ja tarbijates võib põhj seente suksessioonistaadium ja substraadi ligniini/tselluloosi

ooniti. Heterotalsed vs homotalsed seened eri intens mitesug tsüklitega

15N: Castanopsis madalam kui AM-puud; d15N mullas ja orgaanikas tugevasti korreleer  
ei talu täisvalgust. Mõnel liigi Shorea spp: EcM kolonis ja kasv on parem valguse käes kui varjus, ent enamus liike ei talu täisvalgust. Mõnel liigil v tugev

reostus vs viljakehade toodand vs noor/vana mets  
erinevad ainult N03 ja NH4 kontsentratsioonid: parim

peale kobraste poolt põhj üle peale kobraste poolt põhj üleujutisi säilib sadakond aastat metsa asemel kõrgerohu-niit, kuhu okaspuud tagasi ei leviarv seet

Arv. et orhideede levimist mõj seemnete levik ikkagi! Alternatiivselt võib kasvukoht mõjuda kohasusele hilisemas arengufaasis

www: transport väga vähene, sporaadiline, ei sõltu taime suuru:

temperatuur: Rhizopogon ja Suillus opt kasv puhaskult ja EcM mood 25°C

l. Mittester pinnasel kasvab ka muud seened; Külmutatud eoseid on vaja 100 korda rohkem ja kuivatatud eoseid 10 korda rohkem, et saada sama head tule

EcM seente mütseelimatid ja nendega seotud noored puud võimaldavad mändidel rohumaid invadeerida. Samas tammedel ja

antli männiga, mitte midagi kohalike puudega ja AUS akaatsia raport on arvatavasti reostus

üksik, kõik kolm koos parim, suurim ka N2 fix

aminohapped, glü aminohapped vs NH4  
parim kui oli ECM + seemned. Seeme mõjutas rohkem

|     |     |        |
|-----|-----|--------|
| 699 | 699 | N mõju |
|     | 315 |        |

il vrd keerukamatel ühenditel

suurem seente arv mikrokosmis induts kiiremat substr lagunem

EcM kooslust mõj enim NH4.

40 000 000), ja MR kolonis mittesteril 2 korda vaiks

EMH kasv on jõudsam vähesema mulla P korral; väga t

sügav varis, aeglane toitainete ringe, massviljumine, vilets levik; noortel oluline EcM, varjataluvus, suured seemned, pikaalised lehed. Monodomin metsa

leid, et linnud neid juh nokiks. Pole teada ühtki mürgist hüpag seent. Vastuoluline, kas seedimine stimuleerib eoste idanemist ja ECM kolonis või mitte. Ka putu

[Redacted]

**<sup>13</sup>C alaniin: EcM seened** saavad mulda süstitud alaniini kätte ja hingavad viljakehade ka

vaidavad, et ECM-seened saavad viljakehade C taimedelt kohe, eri sümbi  
EcM seened ei omasta radioakt märgitud lehekõdust C ühendeid. Võib-ol  
N väetamine ei mõjuta taimede investeeringuid mükoriis  
mükoriisa vähene! mükoriisa väheneb N ja P (tugevamini) väetades, kasva

**<sup>14</sup>C DHP -synteetilise ligniini <sup>14</sup>C DHP -synteetilise ligniini eraldi märgitud piirkondade lagunamine. I**

**<sup>13</sup>C, d<sup>15</sup>N mükoheterotroofs**setel taimedel just nendega seotud ECM seentega kõige sarnasem. Põhjend  
**<sup>13</sup>C ja <sup>15</sup>N: arv Phaeocollybia** ECM kõrge <sup>15</sup>N tottu, mis arv tuleneb N hankimisest sügavalt mullast r

vakuolaarsete N t N-inklusioidide sisaldus hüüfides eri CO<sub>2</sub> ja N juures

vedelkultuuris kasvatatud puudel olemasoleva EcMde mantlid hävinevad, säilib vaid Hartigi võrgustik. Vee all tekkivad uue

hüdrofoobsed matid: kuiv, palju õhku, kiirem lagunemine

ääramine blastN abil pole usaldusväärne - konstrueeriti miinimum-evolutsiooni puu. BlastN lähim vaste pole enamasti fülanal põhjal etonid!)

söötmet välja jäetud

i JPN isolaat vähendab taime kasvu ja N conc

ECM seente E-horisoni kivimite lagundamine ja meta

a. Suuremate alade puhul z väheneb. Suurematel saartel liigirikkus ja liigiline koosseis palju sarnasem ja ajaliselt stabiilsem kui väik

kk-tingimused: Salix Repens

peremeestaime genotüüp, päritolu, päritolu\*substraadi viljakus

kk-tingimused: Salix Repens vs VAM

mineraalainete kadumine

eri P/N; AM vs ECM vs aeg

sissid kohaliku taime kasvu

patogeen2. Taimede kaitsemehanismid ja nende universaalsus juurtes ja lehtedes. Arabidopsis kasutab põgenemistaktikat. Seemnete kauglevimise vajadus

eteist

Paxillus koos taimega, vähem taim üksi, suurendab oluliselt oksalaadi pro  
Hebeloma eritab sümbioosis olles er oksalaati, vähem ka malonaati ja atse

muskoviidi ja horneblende lagundamine: EcM seened ja

e taset

15N ökosüsteemide toiduahelates, metaanal: 15N prop soltub enim eritatava N jaagi aimest, taimtoit=lor

97% peksab kokku liiga palju liike. Mõnedes genoomides 16S koopiad üsna divergentsed

inimasustus on vii inimasustus on viimastel ajal muutnud oluliselt nii N, C

spetsgeenide avaldumine

II panekut

Piceirhiza-võime lagundada orgaanilist ainet, surnud juuri & mütseeli

iopeziza (erandiks Phialocephala, kus kõigi taimede juure endofüütid

32P inokuleerimine puusse puuritud auku ja det 32P inokuleerimine puusse puuritud auku ja detekteerin

seened, AM-seened

erikoidide mitteesinemine (v.a Cenococcum)

EMH kuusikus vs kuuse-tam EMH kuusikus vs EMH kuusikus vs kuuse-tamme segametsas. Kuusikus :  
tuvastamine PIXE analüüsiga

ergosterooli, valkude ja kitiini kontsentratsioon sõltuval

IAA ECM vs non-MR sama

NO<sub>3</sub>, NH<sub>4</sub> hulga varieerimine; NO<sub>3</sub> mõjub EM-le pare  
P omastamine otse apatiidist ECM seente poolt: enamv  
K, Sr ülevõtt on tihedas seoses ECM kolonisatsioonig

finlandia mood ecm

mükoriisa tekkeks vajalikud geenid olemas kõigil maismaataimedel. Hiljem need geenid soodust ka muud

⇒ taimedega; alati kaasnes parem kasv peremeestaimel

o od endoMR EcM seentega, kolmandad AM. EcM on monedele liikidele hadavajalik, et kasvada sügavast mullast maapinnani. Hiljem EcM arv fakultatiiv  
(mitteMR); 2-3a Discinella terrestris ja Aleurina sp (mitteMR), Pulvinula tetraspora (MR); 3 a Nothofajnea cryptotricha ja Labyrinthomyces varius (mõl M

eemnete idandamisele. Ei soltu eriti sellest, kas isol sama liigi juurest või mitte. Muud seened ei stimul idanemist



lehtede lagundamiskiirus 300 päeval (ent mitte 20 päev)

seente-bakterite seente-bakterite suhe sõltub enim mulla C:N su

oonid tolmeldajatega veavad seetõttu liigiteket; orhideed leidsid sobiva seene ka kaugelt istutusalt - seega nende roll liigitekkes väil

1 EcM. Monospets. Chlorogaster ja Diplocystis

ajad

mmellodendron, Tremelloscypha, + ECM + OrM. 3. vahepeal S. allantoidea, Efibulobasidium, Craterocorolla -biotroofseid vorme ei teata; Arv Sebaciales

Casuarinal N lisamine ja taim

<sup>13</sup>C rDNA bakterid, rikastatud <sup>13</sup>CO<sub>2</sub>

isarium eelistas jaanuari, septembrit ja kõrge häiritusega mulda. DCA löi lahku eelkõige mullatüübi, mitte kuu järgi

ilis, lagund rakke, inh kasvu pH 5.7 juures, pH3 sama), Phialophora finlandia (stimul kasvu mõl, er pH3 juures), Chloridium paucisporum??? (stimul kasvu

www: arv C ülekanne soltub taimekooslusest; arv seenepoolne investeeri

AM ja ECM teke. ECM tekkinud iseseisvalt mitmetes rühmades ja tagasi pöördumine saprotroofideks, mitte parasitideks. I

Calostoma cinnabarinum on pisolithuse ja sclerodermaga ühes pundis, mood EcM

mineraalide lagundamises EcM seente roll minimaalne või puudub

domineeris VK biomassilt, ent EcM osakaal jäi 0.2 ja 0.5% vahele, ent sagedus oli suurim (20% proovidest); ei mõjutanud teiste sei

nevused taimekasvule, kolonisatsioonid, ECM morfoloogias

C ja P ülekannet ei toimu eri Pisolithuse isolaatide vahel; sama

14C liikumine ECM juurtesse on suurem; suur sis 14C liikumine ECM juurtesst 14C liikumine EC.  
14C woodwidewebi uurimise 14C woodwidewebi uurimiseks  
ärskem on ala, seda vähem on genotüüpe, ühe ala piires suurim genotüübisine kaugus 78m; genotüübid läbisegi, ent vaid ühel juhul samas proovis 2 genotüüpi  
ECM mõjul 15NH3 ja 15NH4 ülesvõtt suureneb ECM mõjul 15NH3 ja 15NH4 ülesvõtt suureneb

mulla mikroseedid suudavad EcM seentest palju paremini  
Pisolithus suudab omandada N tanniinist kui seda on tö

aga arv.

vs erikoidse MR seened

a

kolb, MNC sööde, steriilsed tingimused söötmesse ei lisatud

gi taimekasvu ja Frankia N fikseerimisele EcM moodelduseks on nakatumine Frankiaga. EcM seened suurendavad veelgi taimekasvu ja Frankia N fikseerimist

Erinevate lämmastikühendite mõju ECM-seentele ja sa

Kalmia (Ericaceae) lähedus

ae. Bakteritel muutused väiksemad: vähenesid alfaaproteoB ja Aci **mullaseened vs.** Girdling: kontrollis EcM seened Cortinarius, A

pogon vinicolor, Poria terrestris; Cenoc ja Piloderma fallax ei moodustanud ECM

ise/esinemisega. Liikide kadumine võib end mikroobidele eriti tunda anda vaestel mineraalmuldadel

Tuber tõrjus teised seened välja

**fungitsiidide mõju**

**EcM vs Sap: 15N muutub** sügavuti -4..+5; arv. Tricholoma saab kõik C peremehelt, Lact

**EcM vs Sap: Tuber melanosporum, brumale ja rufum on** kogu aja kui VK areneb, EcM. !

edele ja AM-taimedele kultuurtuubides. V sageli mood rakusis kerakesed moniloidsete hüüfidega. EcM ega HN ei olnud

ergosterool ei lagune mullas ei puhtal kujul ega ka rakumembraanide osana

ei pole ja C heterogeensus väike, on tugev konkurents ja log-normaaljaotus, kus bakterite diversiteeti mullas mõjutab C-rikkus, C-heterogeensus, konkurents

üldkatvus (opt. 30...40%)

juurte jaotus ebaühtlasem ja rohkem auke. Viljakehad samas klastris võisid kuuluda eri genotüüpidele. Max geneti läbimõõt 7 m ja 11 m vanas ja noores metsas: agreg - arv eosed levivad mõnikümme meetrit. Samas 700 m kaugusel olevad popid pole üldse eristunud - arv geenivahetamine esineb järkjärguliste lühikeste etappidega

irsite juurte kasvu

AM süsinikuringe. Väga palju C mullas glomaliinina, mis on väga pika eluea aine. C3, C4 ja CAM taimede 13C erineb. Orhideedel (C3) v neg 13C, kõrgem mykohet orhideedel

aga -pms Piloderma, Pezizales, Thelephora-Tomentella). Arv C saamiseks on keerukamad viisid ja esineb C kaotusi vrd N-ga



metallid, stressorid, kemik viljake seente eluiga geneetika, genoomika, ekspressioon

hüüfistruktuur proovid, EcM hinnang, biomass

fülogenomika: toidutööstuse pärmiliikide fülogeograafia genoomide baasil. Sacch uvarum p

madalam kui ameerikas bakteritel ja 25% madalam eukarüootidel. Väidavad, et kliimal ei ole olulist mõju bakteritele ja toetavad Baas-Beckingi l

) ei kopreleeru

SWE kuusikute vanusereas - BD k

monospoore kultuuri sisene ITS varieeruvus tavaliselt minimaalne; eranditeks Laetiporus, A:

risus segab.



aka K, Houbraken J, Hughes K, Huhtinen S, Hyde KD, James T, Johnson EM, Johnson JE, Johnston PR, Jones EB, Kelly LJ, Kirk PM, Knapp DG, Koljalg U, Kovacs

Hebeloma velutipes: dikaartion sisaldab kaht monokaartionit (lahknevad 50/50), mille ITSid on vaid 92% ide

Seega ülekandehelates oluline just molekulitasemel isotoopide võrdlus

kide tuvastamiseks

0% EcM ja 2-60% AM. Ei tuvastatud mulla äga muu rolli erinevustele. Suurem sademetehulk korrel AM rohkusega

Zn-tolerantne Suillus bovis suurendab taimekasvu nii kontroll kui Zn-reostuse juures, samas kui 1 Zn-tundlik seen suurendab taimekasvu vaid kontrollmullas, Zn-reostuse AM vs ErM taimed erineva N, P juures

EcM liikidel (Sg Ramaria) 15N korral EcM sügavuse asustusega

mikroproovid, mikrokaardid,

Hydnum: ITS liigisisene

saaste vs viljakehade esinemine

risomorfide tüübid

Al vähendab kasvu eriti mittemikroorganismide taimedel; ECM vähendab teistealustel katioonide leostumist; leelismetallide lisamine vähendab Al negatiivset efekti. Mitte-ECM taimede modelleerimine-MR taimed stabiilsemad

vananedes ECM funktsionaalsus ei kao! VRD TEISI!!!

taime 32P ülevõttel palju efektiivsem kui mitte-MR taimel ja EmH-ta MR taimel, ka transpordil pealsetesse;

ast idanemist. Tuubidega eraldatud idanditel ei tek EcM. Intsia kasvule AM seentest rohkem kasu kui EcM seentest > kontr kõigi P väetamise tasemetel juures. Shorea EcM t

koloniseeritus Malaisias: Intsia Shorea

ECM puud troopikas: Dipterocarpaceae

ECM taimed troopilises Lääne-Aafrikas

juuretippude eluiga mood 2 kuud, ent mõned tipud >3 a (5%); risom juuretippude eluiga mood 2 kuud, ent mõned tipud >3 a (5)

Sebacina spp: väikesed genotüübid, samas juures palju sarnasemad seq kui erijuures

usis 7x; Cortinarius spp vähenes 75x

hübriidide tüübid, näited, kaitsevajadused

AM ja EcM kolonis kevadel madalam k

Hispaania maaiseste viljakehadega see

taimekasv ja ECM mood parem noortel

Tricholoma matsutake geneetiline struktuur varieerub mööda metsade füüsilist kontakti, mitte

Rhizoctonia kompleksi rühmad: Helicobasidion, Tulasnell

glutamiini omastamine  
liigisisene RAPD  
vs keskkondlik: vananemisest tingitud muutused N omastamises

CO<sub>2</sub> stimul ja O<sub>3</sub> nõrgalt i CO<sub>2</sub> stimul ja O<sub>3</sub> nõrgalt inh EcM seente VK biomassi haavikus. Leccinum spp suurenesid enim, ent mõnedel liikid

mikroobide biomass ATP ja SIR järgi. I

õttu, DNA analüüsi jms. Troopikas domin SordM (kult-põhjal) on haruldased DNA-põhistes uuringutes; morfofüürideks jaotamist tuleb vältida

N-reostus vs ECM

Ca-oksalladi kristalliseerumine

aaade

eluiga 80-100% EcM juurtel all 3 kuu, NM juurtel alla 2 kuu

mikrokosmos kahe klaasiga ja 1 cm vah

: näitab orgN ülesvõtu suurenemist

resistant propagule (BD väiksem)

: N: Russula cf. Amoens; madal N: Cortinarius subgen Telamonia; lisaks Sarcoschypha, Entoloma, Lophiostoma

d=2,8x20\*9\*3\*4\*2\*3; rnd 10 tippu, san

.Jt

vetel

Metsas taim=ühik, laboris substraat: r= % koloniseeritud, liike ei määratud  
fraktaalgeomeetria: pikkus vs tihedus-p

% koloniseeritud

vs okka-(mõnd stimuleerib, teist inhibeerib) ja kõrreekstrakt (inhibeerib):

g sellest lahut maha, mis peale inkub alles jääb. Leiti, et PLFA reageerib kiiremini, s.t ergosterool lagun aeglasemalt; inkub väh

ECM EMH jaoks võetakse koguproovis rasvhapete põhjal: bakterid vs seened; e kasvu mootmismeetod: 14atsetaat>ergo

seente biomassi hinnangud: PLFA

soolastress: Scleroderma hõlbustab soolastrees üleelamist Coccolobal -väheneb NA ja CI omastamine, suureneboitainete omastamine

PLFA

PLFA: mikroobide biomass suurem priin

nineraalidest ja neid taimedesse transportima.

olevad hüüfid ja seda ka metal märgitud fosfaati suudab transportida Tuberi viljakehas olevad hüüfid ja seda ka metaboliseerida; arv et Tuberi viljakeha iseseisvub pea

r200

%koloniseeritud

itte anorg P kättesaadavust ega mitte N kättesaadavust

%koloniseeritud/juure pikkus

%koloniseeritud

d ei teata

ndus

tanniin: Hymenoscyphus: suud .

%koloniseeritud morfotüübiti

nenosc ericae

matsutake looduslik viljakehade produk

mutualismi stabiilsuse ja suurima kasu tagab aeglane evolutsioneerumine

ergosterooli mõõtmine j abiomassi kalk

pudelikael seoses jääajaga

Tuber melanosporum: mikrosat (viletsad tulemused) + RAPD: ühe puu ümber keskm 2 genetiit, geneetiline v

RAPD: Tuber melanosporum -regioonit

kanne peremehest maksasamblasse

Pisolithus liigisisene sõltuvalt peremeestaimest ja kasvukohast

%koloniseeritud liigiti

vs saproobidega

juuretippude eluiga seeneliigiti

%koloniseeritud, ergosterool

r = 2,3\*30(n=2\*5); biomass

ECM dormantsed poua ja külma ajal

Cu, Cd, Zn, Pb, Ni mõju amiinide omastamisel vs ECM vs kontsentratsioonid  
Zn, Cu, Ni, Cd-taluvus isolaad .

dormantsus

dist. Nulul 95% Ca apatiidist, vahtral 60%; mõõdetud Ca/Sr

saprotroofid

ij-maal, heterog mahajäät maadel ja preerias, ühtlane metsas; AM kolonisatsioon eri suksess aladel erinev: põllumaj-maadel m: %kolonis asemel ECM juuretippude ko;

ECM kolonis *Hebeloma cylindrosporum* poolt ei aita eriti lühiajalise põua vastu, kuid oluliselt suureneb juurtele kinnituv materjali hulk, juurte eripind

stavasti mõjus ka inokulaadi lisamine, sest need katsed, kus EcM ei mood, oli taime mass kontrollist suurem

AM vaher seevastu kannatas nii juurkonkurentsi kui EcM vorgustiku tottu (parim kus polnud ei juuri ega niidistikku). Arv et EcM seened hoiavad ara AM puude peale

%

sega substraadist või läbi anaplerootilise rikastatud Co2 fikseerimisest

e NO3 omastamist, juurte arengut, aga mitte NH4 ega ami Üks Paxilluse tüvi mõjutab eri seemnepangast kuuskede NO3 omastamist, juurte arengut, aga mitte NH4 ega lates 16 mg/kg muutus NM tair *Descolea* ja *Laccaria* mood viljakahi potis, eriti madalate P lisade juures. VK sisaldasid kuni 70% taime P-st

EcM seentest eukalüptile oli kasu vaid siis kui muld oli väga kuiv; muidu kontroll ja EcM taimed samamõõtu. Mida niiskem oli muld, seda vähem mood EcM

transformatsioon koralse päritoluga fluorestseerivate valkudega

aade C-ühendite 13/12C: Lipiidid ja Ligniin v madala 13Cga ; juurte hingamine v 13C diskrimineeriv, muu hingamine mitte.

veestress , eri seened, Kuusk (EcM stimuleerib) vs mänd (mõjub vähem); liiv vs huumus (kuivab aeglasemalt) trisomorfide esine 3 klassi horisonditi potis

r=4\*10(n=10\*6)transekt

r=4\*15(n=10)

PAH degradeerimine ECM seente poolt -vedelkultuur, suur soltuvus substraadist

15N hulk korreleerus vastuypidiselt EC



on liigi ja N-ühendi diskrimineerimise vahel.

ergosterool: pentaani abil mõõtmine: vä

resistentsed puud: 50%, vastuvõtlikud t

% koloniseeritud

mükoriisa teke juuretippude arv

valt sama proovi mullale, seega arv. Et seonduvad eri liikidega. Tohtu ruumiline varieeruvus väikeses skaalas  
:alyptil. Arv MR hüüfid olid inokulumiks selles mullas

harv prahipaikadel, sagedam normaalse

kollapseeruvad, ECM areneb tipust aluse suunas.  
sisaldus vs ECM

ECM teke: juure apikaalmeristeem kattub ohukese mantlig  
mükoriisa teke

RAPD autokorrelatsioon kuusel

kui ECM-s, mütseelis pigem monoP. Erinevus Hartigi võrgu ja mantli poliüP vahel: HV-s rohekem K, vähem Mg. Eriti K ja P vahel tugev korrel, teised mono-ja divalen

on tugev imeja; 32P jaoks on taim tugev imeja. Tundub, et taim reguleerib P ülevõttu seene poolt vastavalt vajadusele: seen pimedas ei omastatud P ega transportinud c

Enoc jt suveseened aktiivsed rohkem suvel

seentel on kadunud või vähenenud mitokondri genoom; paljudel mitokondrid asendunud hydrogenosoomiga, c

Sveitsis üle 30 a: aastane kogutoodang kasvanud ja nihkunud keskm 10 p edasi; kogutoodang sõltub pos aastastest ke

Pisolithus liigisisene, ECM moodustamise võime, kasu taimel %  
%koloniseeritud

morfotüüpiseerimine tuvastab palju rohk

poolt

risomorfidehulk, frkvents

Morchella rotunda kuusel: koloniseerib nii juuretippe kui ka suberiseerunud jämejuuri nn valkja kattega. Identif septade ultrastr järgi. M  
ondiofoorid, ent ECM taimedel mitte. Paxillus hoiab ära ECM taimedel Cyl rünnaku ka lähedastes mitte-MR paigus, Cyl hüüfid moonduvad

melaniinid: keemiline koostis, definitsioon; mitmeid eritüüpe tekke järgi. Bakteritel, kandseentel ja kottseentel erinev melaniin. Bakteril neutraliseerib toksilisi fenole,

$r=5 (n-(3*3))*2$

ECM juuretippude C-ühendite sisaldus vanuse järgi

xxx

risomorfide sisestruktuur -ei erine pikkustpidi; kanalhüüfid

erikoidse mükoriisa seente peremeestaimed, võimalikud sidemed, seente ja kanarbikulaadsete raskemetallide taluvus: ülevaade

liigisisene varieeruvus metaboolsetes ja füsiol protsessides: liigisisene varieeruvus metaboolsetes ja füsiol protsessides ECM seentel tuvastatud pea igas uuringus

AM seente tapmine benomiüüliga soodustab invasiivse Centaurea sissetungi konkureerides mõne taimega, samas vähendab seda mõne muu taimega konkureerides. Eri

P kui bulk mullas; bakterid sügavamal mükorisosf mullas efektiivsemad kui poindmises mullas

liigisisene: RAPD; homo vs dikarüootne

tselluloosi, tärklisi, ksülaani, rasvhapete estreid, valke, mitte aga fenoolseid struktuure

a taime vastastikune  $^{13}C$   $^{15}N$  ülekanne. Seenest Gly ja taimest  $CO_2$  märgist kujul. . Seega rohelistel orhideedel mutualistlik mükoriisa. Juhuslik leke välistati. Palju GI

ma

**Tricholoma scalpturatum** Euroopas: 2 krüptilist liiki, lähedalasuvad ppulatsioonid ka üsna eri

parandab oluliselt taime P-toitumist erinevate mineraalide lisamise (v-a  $CaCO_3$ ) korral. Arv. P omastamist parandab hoopis  $H^+$ , mis eraldub koos oksalaadiga, ent m

inokuleeritud **Rhizopogoni** suhtelise hulga vähenemine 2 aastal vrd 1 aastaga %koloniseeritud

puud

**Rhizoctonia solani**-**Thanatephorus AG3** eristab tubaka-ja kartuli spets tüved omaette rühmadesse. AG sees o

inimpopulatsioonide levik, geneetiline muutlikkus

endab oluliselt mulla normaalset C-sisaldust. **Suillus viljakehi** tohutult-arv saab kohalikust mullast lisa C-ühendeid, vähendab olulise **Suillus viljakehi** tohutult-arv saab kohal  
**Armillaria vs Hypholoma**

Na-stress

taluvus  $NaCl$  -le

kuivatatud  $+80^{\circ}C$ , gravimeetriliselt kaa

ligniini ja mangaani peroksidaaside DNA erinevused

ti eri liikidel nii kolonis% kui taimekasvu stimulis osas. Soovitavad muude puude alt korjatud Sclerodermasid eukalüptide inokuleerimiseks. Kasvuhoone: d=1\*10 n=2/taim; koloniseeritud Scleroderma spp: männi ja eukalüpti ko

juurepikkuse koloniseerimine

1...5a puud, sagedusklassid

Pyrola ja Chimaphila populatsioonid on vähe divergeerunud. Paiguti väga suured kloonid

piisa, sest ei suuda eose kesta seedida ega kitiinist N omastada. Muidu väga varieeruv liigiti, ajaliselt ja piirkonniti. Mõningaid mikroelemente kuhjub seentes, teisi ei a

seente biomass suureneb tundras kui vä

VP, MnP Pleurotus ostreatus -Mn2+ mõjul mone 4st isosüümit transkriptide arv kasvab, monel langeb

tubulaarsed ja sfäärilised vakuoolid: N, K, P hoidmine, tra

hüpopogeilised seened: eri eelistused raie

erinevate kemikaalide mõju ECM, bakterite, aktinomütseetide arvule

%koloniseeritud morfofüüti ;mütseeli

Zn taluvus: Suillus luteus >, S bovinus > Paxillus; Zn-tehaste lähedustes peaaegu kõik genotüübid Zn-resistentsed, keskel nii ja naa, kaugel sensitiivsed. V palju isolaa x, suur proportsioon seenbiomassis vs taimekasv KMnO4 põhjal, pöördvõrdeline taime k

Suillus: Zn, Cu, Ni, Cd taluvus looduses ja laboris

Suillus: metallireostus vs kontrollalal

Hebeloma transformeerimine Agrobacteriumiga: matseraat, opt temp 23°C

kolonisatsioon sõltus kõdutüübist; maap

söö, sest need ei seedu; seedib kitiini, seenes palju kättesaamatut N

sadesse -< taimed pole C-limiteeritud; arv. Et taimed saavad lisa-C seentele, et see vahetada N, P vastu

ECM taimede kasvukiirus korrleer

re; ammutavad ka lähtekivimitest mineraalseid toitaineid org-hapete eritamisega; MHB abistavad murendamisel; www-d aitavad seemikutel võr

ECM tipud ei sunn ECM tipud ei sure talvel, Thelephora ri  
üleujutus: alla 15 mm veetasemest anaeroobsed tingimused; korduvate üleujutustega männi juured adapteeruvad üleujutus: alla 15 mm veetasemest anaeroobsed tingimuse  
veestress: juurte kasv peatus peale uputamist ja paljud juured surid, eriti kuusel. O<sub>2</sub> puudus tuli 2\* kiiremini 15°C kui 6°C juures; hiljem juured taastusid  
mänd adapteerus aeglasele uputamisminekule paremini kui kuusk. Männil tekkisid juuresteelis spets ohukanalid. Adapteerumisajaga juurte elumus palju suurem  
veestress jämejuurtel: nii kuusk kui mänd toodavad "lenti-rakke". Kuusekasv pidurdus, ent männil mitte. Kuusel ksüleemi juurdekasv pidurdus järsult

lehtedes, N-mineralis-ga; ent langeb sademetehulgaga,

m. Arv kõrbeliigid tek rannaliikidest

; või tühtlane väetus: taim saab sama efektiivselt kätte 15N kui NM-taim; 33P vähem. AM suurendab P kättesaamist eriti laigu-töötluses  
koriisne taim saab sama efektiivselt kätte 15N kui AM-taim sealt kuhu juured ei pääse; 33P ei saa NM taim üldse. Vahet pole, kas N ja P on kontsentreeritud laiguna või

kõdu lisamine: suurendas kolonisatsiooni

kui ühe puuliigi okkaid nüliti, läksid seda eelistanud seemned üle teisele (männilt kuusele); kontrollalal kyllalt suur peremehe-eelistus

genetite Cs sisaldus viljakehades ei erinenud

kuni 300  
491 492

Suillus variegatus liigisisene

ülevaade, viited

1.5\*1.5\*6 (n=10\*4); biomass

r=1,4\*15 (n=5\*3\*3\*2); ülemine vs alumine

osakaal

ülevaade, viited

sklerootsiumide arv

Cantharellus

ECM sesoonsus

Sphaerosporella, Laccaria, Pisolithus m  
suvaliselt

olireostusjäätmel: inokuleeritud seente asendumine kohalikega kiire; ECM moondunud, eriti norkadel konkurentidel

eritaimlates ja eri-okaspuuliikidel väga t  
makromorf., potikasvatus

Wilcoxina Vrd kandseentega tundlik benomüülile;

Sphaerosporella brunnea õhuke ECM er  
% koloniseeritud  
% koloniseeritud: parim kui kaevandusp

ninohappeid

Hebeloma vk tek vaid kui seen on puuga sümbioosis. Temp flukt ei mõj VK arvukust, ent mõj ilmumisaega. Külmarshokk kontsentreerib

ülevaade

EcM ja AM kolonisatsioon ei erinenud

söödavat seeneliiki, pms Cantharellus, Termitomyces, Lactarius, Amanita. Fenoloogia; madal valgusisaldus; suht kõrgem Termitomycesel ja C

hibeeris konkurente võõr-taimeliik

kalüpti kasv suurenes 13-32 korda, Allocasuarina max 3x, Casuarina max 2 korda. Casuarina juured tegelesid vastureaktsiooniga ning epidermise rakud kollapseerusid.

st; Sarcodes ja Pterospora v kõrgete 15N väärtustega, Pyrola picta vahepealne kõigi ülejäänud puude ja Mhdega. Arctostaphylos madalad 15N väärtused nagu teistel pu

mantlirakkude pinna glükoproteiidid metallide sisujatena  
liigisisene Zn taluvus varieeruv .

% koloniseeritud

Armillaria:2000a Armillaria sp; mutatsioonid

Laccaria bicolor: arv erine sekundaarne haploidsus, geenide kadumine kultiveerimise käigs

% koloniseeritud vs kontaminant

veestress: Cenococcum kaotab vähem elektrolüüte juuretippudest kui Lactarius subdulcis

RT-PCR -eukalyptia ja Pisolithuse mük seenkomponent h seenkomponent hõlmab ca 30% biomass

adusta N omastamist mullast vrd teiste seentega

istest omadustest, arv katioonidest ja huumusest. Varemkasvanud taimede efekt ei sõltunud taimede filogen seostest

Inokuleerides Tomentella sp mittesteril

adavuse korral

Tomentella sp kolonis Afzeliat kiiremini

igundamiseks anorg N. Seetõttu toimub org-materjalisest selektiivne 14N eemaldamine ja orgaanika ise muutub 15N-rikkaks

N saastudes ECM morfofüüptide arv vähen

PAH ja klorineeritud ühendite biodegr väärtused (enamasti tugevam kui ECM sentel; taluvus palju suurem) ja ECM seente poolt (sümbioosis männiga); puhaskultuurid Na mõjub seente kasvule ja mükoriisa tekkele suurtes kogustes halvasti, eriti Na-tsitraat %

Tuber melanosporum soodustab tamme liigi kasvu, ellujäämist, N, P omastamist ning leevendab veestressi (veepot keskpäeval positiivsem)



ECM kolonisatsioon suurem kõrgemate

Paxillus, Suillus - eri tüvedel eri EMH ja risomorfide areng  
xxx  
saprotroofidel: võ fraktalite kaupa mõõtmine

PCB-70% ECM seeni lagundab; kottseened ja Rhizopogon mitte; teised samaväärsed Phanerochaetega

PLFA: mikroobide biomass, seente/bakt

Rhizopogoniga suurem fotosüntees ja õhulohede juhtivus, madalam leheturgor; hebelomaga madalam lehe turgorkõrgem lehe osmotne potentsiaal

atud ajal päeval. Efekt polnud seotud parema taime toitumisega. Arv et suurenenud C-nõue põhj suurenenud FS

RAPD Laccaria bicolor; genetiiline sidusus: palju väikeseid kromosome

Cenococcum geophilum 8 geeni põhjal. Klaadisiselt peab olema toimunud rekombinatsioon

Cenococcum: gpd, ITS, CgSSU intron: , mt SSU: kongruentsed tulemused. Intron tekkinud ühel korral. Arv t

mükoriisa eluiga l.

es ja juurtes ning EcM surnud juurte ning koloniseeritusele ja BD-le

AM seened hoiavad õhulohesid lahti ja lehe turgorit kõrgel

ECM ultrastruktuur: Suillus grevillei + 11 eri peremeest

ECM ultrastruktuur: Suillus grevillei eri peremeestel C küi

Pisolithus-Eucalyptus EcM 4, 7, 12, 21 päeval -eri mustrid. PILDID, SLAIDID

EcM kolonis ja sedagi ü vähe. Suurem EcM kolonis stimuleerib noodulite teket

plotiti mitmete taime juured kokku ja  
Mullatüüpidel EcM kolonisats ja l

:  
e poolt

ECM juuretipu eluga mõõdetuna 3 vanuseklassis vs 14C allokatsioon: liigiti arinev, er

200 random/puu  
vanuse järgi  
%koloniseeritud

seentel arv et on mitokondriaalne konflikt emas-ja isas mitokondri ning tuuma vahel. See seletab kiiret liigite

pruunmädaniku seened ja EcM seened on genoomika põhjal kaotanud suure osa lignotsellulo

siline vs org+mineraalN; kasv, mineralisatsioon: eriliikidel varieerub. Julged interpretatsioonid

10 ECM seent puhaskultuuris kõrge vs

mes mõj koguseene-kooslust enim, CO2 ja O3 efekt marginaalne, arv mõj saproobe ja MR-seeni erinevalt

ECM vs AM: %koloniseeritud

kõrvalproduktide andmine, lai peremeesring kummalgi poole!!!!. Teooriat toetab: mükoheterotr!!!, ECM mittestabiilsus!!!, antagon suhet isel evol kiirenemine red que  
rella on ECM  
sure kasvu sporaadiliselt. Sphaerosporella tekitab teatud nakkussümpptomeid idanditel, ent ei inh kasvu.

eesersed kottseened. Arv. Mullaproovi eraldamisega katkestati EcM jm kandseente sidemed.

iki pool juurtesse; kui algul andis kuusk 100% C seenele, siis hiljem vaid tühise osa ja sai 15N vastu ka vaid tühise osa. Mehhanism ebaselge

ergosterool ja konvertkoeftsint

leva enne, mis näitab, et lagundamisel eralduv CO2 on suht tühise osakaaluga, smas kui juurte ja seotud mikroobide hingamine holmab >65protsendi eralduvast CO2st

kitiin/ergosterool  
mikroobide levik sügavuti mullas: 1m-n

ISSR ektomükoriisadele, SCAR marker ühele Suillus collinitus individile. Suilluse genetiid püsivad 1.5 a pe

klonaalsetel taimedel küllalt suur geneetiline erinevus, popid koosn pea alati mitmetest genotüüpidest, mis täiendavad N saada aminohapetest ka nonMR olles; Eriti tugev diskrimin nitraadi 15N -ary, et mida tugevam on looduses 15N disk, seda suurem osakaal on nitraadil; Transporditud (NH4, Glu, NO3, Gly) ning oluline koostis. Erikoitse MR seen diskrimineeris 15N eriti tugevasti. Frakts võib sõltuda või mitte substraadi konts-st. Arv et igasug

Clavaria: Ericaceae

% koloniseeritud

Tylospora fibrillosa

liigisisene varieeruvus

r=5\*10(n=2\*5); makromorf ITS põhjal;

oale. pH otimum nakatamiseks Tomentelopis 4.5..6; Paxillus 4.5..5.5. Optimum teravam lupjamisel kui tuha puistamisel

% koloniseeritud, RFLP

ent mineraal-N puhul võib see tugevasti kõikuda; NO3 üldiselt rikastatuim, sest senitrif käigus produkt vaesustub; spets ühendite isot mõõtmine  
uktaasi suurem aktiivsus hüüfides

heterosügootsuse allikate vahel vahe tegemine peale pudelikaelu ja kitsaskohti: pidev migratsioon vs järgulin

Tuber maculatum esmane süntees Pinus strobusega. Eriti vermikuliidilisaga pinnasel parem taimekasv (kõrgus, diame

geeniekspressiooni ja N ülesvõttu; mujalt tulev C ei indutseeri

IGS RFLP meetod geneti määramiseks ECMs

mikroobide levik sügavuti mullas: 1m-n

Real-time PCR monel juhul mittesteriil

kui juhyperemees kaotab palju C, ent saab vähe P  
korda vähem P

ECM seentel mik risomorfide kasv  
lehis vs mänd: Su %koloniseeritud

num sagedasem; isoleeritud Laccaria, Inocybe, unkn1 ja Unkn2 sagedasemad. Arv mitte-isol sagedasemad kolonis risomorfidest ja mitseelist kui isol-tute kolonis eosi

%koloniseeritud

raskemetallide mõju AM seentele, ECM seentele, ErM seentele ja saproobidele. Mõjumisviisid, ülesaamisviisid, resistentsed tüved; melaniini ja kitiini tähtis roll detok  
Cladosporidium ja Aureobasidium sisaldavad kuni 30% melaniini ning seovad edukalt Cu, Cd, eriti eri saviosakeste manulusel

Terfezia arenaria, claveryi, Tirmania pinoyi sünt Helianthemumil. Taimekasv ja EcM vs rakusene endoMR sõltus s

risomorfide struktuur eriliikidel väga põhjalikult. Tsentraa

%kolonisatsioon korreleerus pos koguP

CO2 konts tõusule. Efekt erineb tüveti eri liikidest

urenemisele hingamisega, eksudats, biomassiga, C-tarbimise efektiivsusega, N omastamisega. Erandiks Amanita muscaria, Pil

EcM seened reageerivad positiivselt bio  
enamus EcM seeni reageerivad positiivs  
r=1,4\*O (n=5\*3\*3\*3\*2+2\*45)

Zn ja Cd akumuleeruvad pms seenmantli, hartigi vorgustiku ja juure korteksirakkude rakuseinas

rgine Laccariale), rohkem patogeenide kasvu inh tüüpe, rohkem EcM seente kasvu stimul tüüpe (laia spetsiifikaga, kitsa spetsiif

Pseudomonas fluorescens: genotüübid n  
r=2\*12; %koloniseeritud 100 juhuslikus

spooride idanemine

Cd: vähendas koigii organismide hulka, tuhk neutraliseeris cd efekti, tuhk suurendas hingamist 2x, Cd vähendas eriti seente osakaalu ja suurendas aktinomitseteide om

lehekõdu lagundamine ja veesisaldus suurenes, hütüfide ko

iprodiioon vähendab taimede kasvu primaarsuktsessioonilises aimekoosluses  
seente viljumine, eriti saproobidel ja EcM lehtpuude seentel on nihkunud nii varasemaks kui ka hilisemaks

veestress vs ECM: ülevalde -hormoonid, transpir reguleerimine, Cenoc -füüsiline kaitse, vee omastamine pooridest, kaudselt muude mineraalainete läbi, VIITED

Heterobasidion annosum on suuteline nakatama ja kasvama

%koloniseeritud parim aktiivmuda jääki

$r=5*25(n=20)+mfg$  lisaproovid stügan

rn väärtustega

monokaartionid kasvavad kiiremini NO3 ja NH4-r.

gem kui taimedes. N ülevõtt puudel toimub orgaanikahist pms, sõltumata juurte levikust. SAPROD: Mycena, Rhodocollybia asema, Cystoderma

ix>Aut orhidee>muud taimed>muld; Epipactis ja Cephalanthera (nagu Mykohet taimed) omasid d15N ja d13C suuremaid vaartusi kui muud taimed; Listera ovata ja Pl

herbivoorid vähendavad AM ja ektomükoriisa kolonisatsiooni; AM ja ECM vähendavad lehtede kahjustusi. Taimede varuainete kas ja fotosünteesi regul puhverdavad  
herbivoorne stress vähendab, n.  
I per puu  
%koloniseeritud

Thelephora, Laccaria omavad vedelkultuuris väga piiratud naftaleeni degradeerimise aktiivsust lagunematuteks vaheproduktideks, samas kui Lactarius, Paxillus, Cenoc

Heterobasidion vs Trichoderma-oluline roll antibiootikumidel eriti happelises keskkonnas

kasv agaril: earlystage vs latestage erist

mittesobilik MR: maasikapuu: ArbM struktuurid ECM seentega, AM ja Hymenoschyphus paiguti tungisid läbi tanniniseerunud maasikapuu: ArbM struktuurid ECM se

bakterid, seened, AM-seened: 18S RT-PCR+DGGE + klasteranalüüs. Polnud olulisi erinevusi aastaajati ega eri pestitsiidide kasutamisega

anastomoseerumine: selle eeldused, geenid, tähtsu anastomoseerumine: selle eeldused, geenid, tähtsus füsiolo

Ceratobasidiales: parentesoom perforreeritud, Sebacina ve  
d vrd tselluloosiga; Arv kandseened eelistatult metabolis 12C samas kui 13C laheb polymeeridesse. Lagundatud ligniin on u 3,5 -4 promilli 15N vaesem kui lagundatud

Cortinariust ei saa RFLP põhjal eristada. ITS vähe divergeerunud, ent mtLSU annab hoopis paremaid tulemu

dala NO<sub>3</sub>-juures. NO<sub>3</sub>-transferaas: seenel alati aktiivne

seente hüüfijääkidest, mis ei lagune.

lepal: vaid Alpovi; lepal: hartigi vorgustik ja ECM arv

Suillus piperatus ei mood ecm. Juurte juurde agaritiki panemine kiirendas seene veget kasvu

Hebeloma, Cort, Tricholoma, Scleroderma, Pisol, Pax, La

madaldatud temperatuur inhibe madaldatud temperatuur ja väetamine inhibeerivad potis viljakehade teket; lühendatud päev stimuleerib. Korreleerub taime kasvu seisku

irvas+vermikuliit parem kui kompostitud männikoor. Kasv plastkonteinerites

% koloniseeritud, morfotüübid  
r=2,5\*15 eri horisondid (n=72+48); arv

nete saamises sügavalt mullast need puud üksteisest ei erine, kuigi tammel min-mullas v palju juuri

juuretippude arv, %; vs CO2; hütüfi kog

viljakehade alt

t seende transportima 13C ja seenest Vacciniumisse 15N. EcM-isolaat suurendas ainsana taime 13C fikseerimist

dala d13C ja väga kõrge d15N väärtustega võrreldes saproobidega (Cystoderma, Panaeolus, Mycena, Entoloma). Hygrocybe pole kultiveeritav.

matid matid: %kaetud

Mycocosm portaal seente genoomide analüüsiks

1,5a puud, r=1\*10 (n=2\*7\*3); makrom

veestressi vastu ei aita silikoon ega antitranspirant

Rhizopogoni 2 liigi populatsioonide geneetiline distants suureneb kaugusega

RFLP-põhised probed DSE (Phialocephala, tüüp1) populatsioonigeneetika uurimiseks. Phialocephalal kõrge Phialocephala: ITS vs RFLP vs ISSR: P fortinii on komplekslik koos 4 mikroliigist, mis võivad olla koos s

mis arv olevat krüpt liigid. Genetite eristamisel RAPD 2x efektiivsem kui ISSR ja >10x efektiivsem kui IGS2-RFLP. Samad genotüübid tuvastati mitmel eri aastal mõl liigil

matsutake: IGS1 -1 dominantne alleel Jaapanis ja 4-5 haruldast

klasside kaupa laboris





de d15N oli nõrgalt pos seotud (r=0.39)

Ilas risoididel; vihm langetab viljakehade 15N järgm v ülejärgm päeval; saproobidel 15N sama mis mullas; Puitlagund seemed 0-1 promilli kõrgem kui puidus; Viljakel / liiga palju min-aineid ja taim sai ise kätte. Racinuse d15N on u 1promilli võrra mafalam kui NM taimel arv seetõttu , et transpiratsioonivoog A nustrilisust nii mullas kui taimedes

Suilluse agrobacterium-transformatsioon

biogeograafia: tuumamarkerid annavad rohkem ja laialdasemaid võimalusi kui mt-markerid

xxx  
Zc, Cd eritasemed, vs risti-koloniseerimine, kriitika

metallide tundlikkus

vs metallid

%koloniseeritud % vs eri Cd Zn tase

r=5\*30, eri horisondid; aktiivsete juuret

ed eri puudel erinevalt; mõjutab pos niiskus, temp

pH, niiskus, temperatuur kui kofaktorid

r=5\*38 (horisonditi; n=70)

r=5\*38 (horisonditi; n=486)

koguhulk puul

d ECM seentega

alinensisel EcM mõl pool. Mõl liigid jagasid sama 4 MR-tüüpi, millest väh 2 kandseened ja 1 Cenoc

kaseseemikute istutamine erimuldadele:  
%koloniseeritud  
ja DS: %koloniseeritud

ähene ja varieeruv

t teistele EcM ja AM taimedele, er. Üheaastastele taimedele, +-võrdsel kujul. Arv läbib suur osa 15N läbi mulla toiduahelate  
ise vahel. Transp on er suur kui Casuarina on Frankia noodulitega ja ECM > ECM > kontroll. Kui on nii Frankia kui ECM, siis transp toimub pms Casuarinasse hoolimata  
nii mükoriisest kolonisatsioonist kui kiirbakterite olemasolust. Voog on kasuariini arv seetõttu, et tal on suurem N vajadus

seeneniidistiku modulaarsus, ühendused, transpor

isiti

maa taastumisel ECM ja AM kolonis kõrgem kui külvamisel. Inokul metsamullaga ei suurendanud kolonis

sid erinevust mulla ja risofääri ning eri **Laccaria bicolor** + Pseudomonas fl. Laccaria inokul stimuleerib kasvu, MHB mitte (arv sest inokul peale ECM inokul). M  
em kui muudesse. 13C liikus iseseisvalt mullahorisontidest

**makromorf, RFLP**

Suillus variegi kohalolek stimuleerib mullahingamist, mis kompenseerib kõrgemat FS-aktiivsust  
määramisega

**EmH hinnang ja k EmH hinnang ja kasv sõltub mulla struk**

tulenevad eri substraatidest. N erinevused arv eri N allikatest ja translokatsioonist. Seavad kahtluse all ainult 13C ja 15N põhjal seente troofsuse määramise.  
; vrd nitraadi ja org N-ga. D15N sama seene piires korreleerub biomassiga ja söötmes kogu N kasutamise. Arv seente kasvades läheb osa assimileeritud N söötmesse tagasi

ne, P2 13C diskrimin. Arv et see soltub C omastamisest erinevate C kanalite kaudu, mis lylitatakse sisse eri kasvufaasis. . Arv, et loodusest korjatud seeneproovidega t

mt, nu LSU, SSU tähelepanu pööratud resupinaatsetele seentele, palju vigu

Grupp I intron; hibbett arvab, et on toimunud horisontaalne ylekanne

Ceratobasidium bicorne -1-tuumaline Rhizoctonia: tõen homotallism, sageli tek 2-4 tuumased eosed, mis on a

taimed pms hapestavad mulda ATPaasidega, selleks et saada kätte P, Fe. Reaktsioon NH<sub>4</sub> ja NO<sub>3</sub>-le erinev, Al vältimiseks pH tõstmine. Mulda ka orgaanilised happed

Collembola eelistab mõnda ECM seent

mooniumist. EcM tippude 15N suures0-2.3 promilli. EcM kol ja %N korreleerusid 15Nga juuretippudes. Seened, mille NO<sub>3</sub> omastamise efel leerumist taimesse vrd mittekoloniseeritud taimega, taimeosade, seene ja mükoriisa jagamine taimeks ja seeneks 15N mustri alusel

Veestress: N ühendite konts mullas mõjutab taime veekasutusefektiivsust. Suur transpireerimine on sageli seotud mitte kõrgendatud CO<sub>2</sub> vajadusega kui hoopis mine v poollest; NM taimedel 15N sama mis mulla toitainetel. 61-86% N tuleb tundra taimedesse EcM seente kaudu vad rohkem kui EcM seened, sest sapr kasut vana C. Cort ja Inoc kasut sügavamast mullast C ja N; Russ ja Lact kasut uuemat C ja N kõdust; E ub nitrif ja denitrif tähtsusest

udavad rohkem N peremehele anda (siin pm-spets korreleerub risomorfilisusega ja ka taksonoomiaga. Taimede 15N on liustiku servast kaugene

nal mullas põhj 15N rikastumist; häiringud ja makrofauna vähendavad vahel erinevusi; savimullad on rikastunud 15N-ga vrd liiv ja silt-mullad; elgelt erinevamad mustrid, sest niidistikus rohkem kitiini; samaaegselt kõrge 13C ja 15N näitab, et Vkke valgus on mõlema poollest kõrged; 13C ja puhaskultuurides erinesid seened 15N poollest. Russulaceaediskrimineerivad 15N arv omastamisel substraadist

idoreps

arvavad, et Otidea on ECM, Ramaria, C ektomükoriissuse määramine isotoopide

si ja muid C-ühendeid paremini kätte saada. Seentes kitiini ja proteiini osakaal mõjutab kõvasti 15N väärtust, sest kitiin on 10promilli vaesem l

l-21%. Allokatsioon EcM seentesse sõltub v tugevasti allok maa alla. Väidet kõik looduslikud uuringud on allokats EcMi ülehinnanud (15-21%)

iontidest

edel: EcM ja erikoidse MR taimedel neg, AM taimedel ja NM taimedel pos d15N. Vasturääkiv

l liil (selgrootuteni) 5st

ike

entsivõime ning kasulikkusega. See aitab vältida ka arengut parasitismiks. Mudel.

ECM seentel pole täheldatud indiviidi-põhist adapteerumist

em ja EcM kolonis väiksem lõunapoolsetel liikidel ja pop- Rhizopogoni liigid ja männiliigid Californias ei ole spetsiifilised allo- ja stünpatrilisuse seisukohast; Inokul mä

suurem madalama mullatoitainete sisald aladel ja korreleerub ECM tippude arvuga ning EMH ohtusega O-horisondis

kivimiproovid seenehyfyidega. Erivanus

puud investeerivad maa alla augustis 6 x rohkem kui juunis; augustis EcM mood 39% mikroobsest biomassist mull

sem kui caesalp all ja arv N transform teistsugune Uapaca all kui mujal. Korupi kohta stabiilsed isotoobid räägivad vastu, et EcM pole siiski olu on seene osakaal juures, seda suurem on 15N. Arv, et N transport labi HN ei moj iseenesest fraksion. NO3 ja NH4 diskrimin erinevalt.

õigi taimede (EcM, ErM, AM) juurte 15N sisald kasvab sygavuti yhepalju, aga palju vahem vorreldes mullaga; Selet mulla profiili d15N sellega, et sygavamal seentest I välja, 25% läheb kasvukuks

mulla hingamine ja ECM seente viljakel

Uapaca, Monotes (Dipterocarpaceae) j

ECM taimed ida-aafrika savannis: Caes  
15N taimede AM vs ECM staatuse hinc

on, denitrifikats, metabolism; Väidet mullas domin mitte kattes N, mis annab 15N osakaalu ja see aja jooksul ai muutu. Labiilne N muutub, aga seda on vahe; Sygaval n

Grupp I intronite horisontaalne ylekanne kottseentel toen viiruste kaasabil

stutades peaaegu kõik kaovad

ECM ja VK Paxillus erinevad isolaadid

> suunas

kvalitatiivne

adekvaatsem: igast proovist kindel arv j

ITS-tüüpide diversiteet: lokaalses skaalas väike, vaid monel liigil suur (Laccaria spp, Tricholoma flavovirens

NaCl -soolatolerantsed Paxilluse eri tüved käituvad erinevalt: üks võtab soola üles ja säilitab selle kõrvalt funktsiooni; teine ei võta soola üles ja

hübriidid Flammulina liikidel: ITS1 ühelt vanemalt ja ITS2 teiselt vanemalt. Mõl alleelid sam

Ramaria LSU mitu eri alleeli eri pikkusega (1-bp polümorfism)

%koloniseeritud

liigisiseseid ja liikidevahelised erinevused

arjus ei seletu millegagi, ent pakuvad 1. C kandmist mööda risoome; 2. v aktiivn FS suvel; 3. "mükoriisa abi"

il võivad nakatada ka mitte-peremeestaimi. Cenoc isolaat nakatas okaspuid, aga mitte yhtki lehtpuud. Kui lisada liiga palju Glc, on taime kasv inhib arv seente eritatud j

kultuuris EcM kandseened ei tooda koniide; Lima

ssimil-kiirus; maapinna lähedal CO<sub>2</sub> võetakse respireeritud molekulidest - seetõttu madalam; 13C rohkem sügaval mullas; 15N troopikas 6.5 võ

Tuber spp: aeglane kasv, kipuvad kõngema, statistika kult

uude keemia ja varase staadiumi seente mütseel võib paremini mõjuda hilise staadiumi seente idanemisele; 48% mõju idanemisele oli puu genot

egatuse ektodes, mis korjatud lagupuidu alt

arv et AM-süsteemis C-liikumine taimest taimelt üldiselt ei

veestress: mulla veesisaldus üldiselt väiksem preerias kui metsas; koikumam kui vosas ja metsas, tugev aastaajaline fluktuatsioon

SCAR praimerite konstrueerimine EST andmebaasi põhjal Hebeloma cylindrosporumile. 6 markerit suudava

ui Lactariusel

ülevaade

emale ei ulatu. Peenjuurte eluiga keskm 4.5 a

parasitism...mutualism

PAH biodegr on risosfääris kiirem kui bulk mullas, ent MR hüüfide olemasolu inhibeerib lagunemist, arv MR seened võtavad ära lagundajatele vajalikud mineraalained

org-happed metallide sidumiseks. Oksalaat võetakse rakku sisse

dega

200 random ECM

vähem (Cenoc) vrd NM juurtega. Puudus EcM seeneliikide ja ühendite vah interaktsioon

EcM kolonis korrel biomassiga

mine ja kasv on suurem kui Amphinema = DSE = kontroll

ECM ja AM sümbioos kui parasitismi-r

vs lämmastikväetis

$r=2,8*5(n=20*2)+1$  cm<sup>3</sup> random; rando

$r=1,4*15$  (n=5\*4\*2); frekvents

10\*10\*8 (n=3\*5); random 25/n

ing suurendavad mineraalide paisuvust

d ja ressurss on lihtne, ent komplementaarsus pääseb domineerima kui ressurss on kompleksne ja geneetiline erinevus tüvede vahel suur



: N sisald albiinodel suurem, D15N korgem kui muudel taimedel, arv saab osa C ja N Thelephora sp1lt, millel on juurtega sama ja lehtedest 2-3 yh vaikssem D15N (sam

ti suur mulla kōdupuidus. Min-muld siiski tōhtis, sest massina on seda palju

ta  
endab nende akt., sūgisel PerOx akt vāheneb - ARV SOM ja FOM lagundajad vahelduvad; puudel on tugev mōju mikroobikooslustele ja nende

%koloniseeritud morfotūibiti

Heterobasidion annosum cDNA rmtk: geenidel vāhe sarnasust, ylesreguleeritud tsūitokroom 450 geen, super

M kolonis osas

Thelephora terrestrise mōju on eri

NOR: viljumise aeg mōjutab eoste suurust. Varem viljuvad liigid ja kuivemal ajal viljuvatel on suuremad eosed

Trichaptum: mitu ITS ja IGS varianti. Dik org-s kummaski tuumas erinev ITS v IGS versioon. 85% juhtudes

hūbriidid Coniophora puteana kolmel krūptilisel liigil: ITS1 ūhelt, ITS2 teiselt vanemalt ja ef

Lyophyllum shimeji=L. Fumosum EcM mood juurutatud vartel. Mood puhaskultuuris ka viljakchi

eente poolt puhaskultuuris, pigmentide sōltuvus N-allikast liigisisene ja liikidevaheline varieeruvus N-ūhendite omastamises arvutamine agarilt

EcM mõju kasvule parem niiskes vs kuivas mullas

15x15\*3\*12; fragmendid ..100 tippu

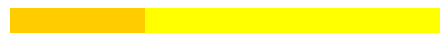

16 cm<sup>3</sup>; % koloniseeritud tüübiti

Tüvede eristamine PCA ja x2 testi abil üht tüüpi märgistusega genoomse DNA abil.

eukalüpti invasioon arv tänu mürgisele varisele ja allelokemikaalidele. Eukalüpt mõjutab risosf bakterite kooslust DGGE ja funktsionaalset mitmekesisust neg. AM see a mullas pole seoseid EcM suhtelise ohtruse osas. V tugev neg seos C/N suhtega

elevCO<sub>2</sub> -kvantitatiivselt seeni CO<sub>2</sub>-ro

lassiga.

Trichaptum abietinum: 3 ortoloogset ITS1 regiooni (pseudogeenid, hübriidsatsioon, heteromeersetes kromos

taimed + ECM + saprootid TNT bioremediatsioonis efektiivsed

i seente efektiivsemast oksalaadi tsirkulatsioonist. Lagundatava puidu d13C ei muutunud 50% massikao järel, mistõttu arv, et seentel oluline ka CO2 pime-fikseerimine:  $r=3$ ; 13C sisaldus ei muutu puidu lagunemisel, ent CO2 stabiilne isotoop muutub

het teha EcM seentel ja saproobidel, vaid EcM seeni tuleks käsitleda ki biotroofi-saprootofi kontiinumil. Kui juur sureb, siis EcM seen saab esi

ECM kolonisatsioon vähenes kõigil seentel männiokaste lisamisel

puhaskultuurid. Männiokkad söötmesvähendavad Amanita

ECM seentel pms vältivad interakts omavahel, pms domin  
2000 m2; 80 plotti, >420 proovi kokku;

Tomentella sp

mükoriisa mõju herbivooridele: spetsialistidele positiivne, generalistidele negatiivne; sõltus ka herbivooria tüübist. Mõjutab nii toitainete kooss

$r=2.5*15$  n=?; %koloniseeritud; vähenes

hübriidhaaval vs N väetamine vähendab

kui väetada; N-vakuoolid vaid noortes ja keskealistes rakkudes

Al säilitamine polyP vakuoolides, need ise pole tundlikud kõrge Al taseme suhtes tsütoplasmas

Xerocomus badius-mantel väga mikro-ja makroelementiderikas vrd teiste seentega, eriti P, K, Mg, Zn; Hygro suured vakuoolid -sisaldavad n, väikesed vakuoolid -polyl

viabiilsus: mootmine fluorestseini diatse

Nii taimedel kui ECM seente viljakahadel tõusis N konts. EcM ja ErM taimedel ja Orthiliaal v tugev pos mõju 15N-le, ent Pyrolal tugev neg mõj

noored puud

200 random

200 random

iletaks varjutamise või juurkonkurentsi efekti

Laccaria sp: monokaartionid vs dikaartionid: sarnane, dikaartioni om 5 palli

Quercus robur -Piloderma fallax: tamme transkriptid vahetult enne ECM mood: ca 50 ülesregul, mfg

st kõvasti. Mükoriissel taimel on eritamine 2-8 korda suurem kui mitte-MR taimel; eritamise maksimum on 17 p peale inokul.

okaste eemaldamine looduslikul männil

Thanatephorus cucumeris=Rhizoctonia solani -Agde ITS varieeruvus: ITS1 varieeruvam kui ITS2; AG-sisen

one taimeliigi panust toitumisel kasut org-mat tekkes

arv et ECM seente dikariootsed genetid inkorpor arv et ECM seente dikariootsed genetid inkorpor endisse

viljakehade Hg sisaldus Helsinki: max niidusaprotoofid, min ECM ja puidusaprotoofid

Üldbiotsiidid (MetBr, SMDC jt) liikkav ECM tipu eluiga ca 3a

kõik männi 2harulised tipud on ECM, jt

d maad, põlenud alasid, metsataimlaid, väetamine stimul., võis viljuda väh 2 meetri kaugusel elusjuurtest; eoste idandamine noore taime juurtega ei õnnestunud; tüved a

EcM%le; arv et klamüdosp ei ole nii vastupidavad sailitamisele kui eosed

Pisolithus sp ühest viljakehast saadud er monokaarüonide Pisolithus sp ühest viljakehast saadud er monokaa Pisolithus sp ühest viljakehast saadud er monokaarüonide  
Pisolithus sp ühest viljakehast saadud er monokaarüonide Pisolithus sp ühest viljakehast saadud er monokaa Pisolithus sp ühest viljakehast saadud er monokaarüonide

Pisolithus: ECM moodustamise ja taime kasvu stimuleerimise võime %koloniseeritud  
risomorfid Pisolithus: monokaarüonidel puudusid tä risomorfid Pisolithus: monokaarüonidel puudusid täielikult

C liikun .

id siis kui rott on need ära söönud. Arv. Et rott on v efektiivne eoste levitaja, läbides päeval 1 km

ektomükoriisa vs mulla DNA: liiga vähe

EMH lugemine = EMH lugemine = PLFA 18:2w3,6; DG

NaCl: Paxillus involutus leevendab hübriidhaaval stressi sümptomeid, ent ei vähenda Na ega Cl taimes. Efekt pigem läbi oluliselt parema varsustatuse K+ ionidega

varieerus tugevasti aastaajati; %kolonis sama

ECM kolonisatsioon m-l ja biomass ta

kaltsifioob Paxillus akumuleerit .

inokulumi eluvoime: turvas/vermikuliit (4kraadi juures parem kui toatemp; 4o Pisolithi inokulumi eluvoime: turvas/vermikuliit

ECM vs AM: juure pikkuse %

ericales: MR tüübid: eriliikidel leidus m

alleelide divergeerumine ja geenitriiv. Erinevused survega geenidest. Metsapuude näited

mika väga erinev kase juurega kokku viies mittemükoriisne Paxilluse üks tüvi, mis on mükoriisne, erineb genoomi ja ITS pooldest väga vähe kahest teisest tüübist, ometi  
Paxillus involutus G 21.5Mb

konkurents, katsed, ülevaade  
imine

EMH uurimise m EMH uurimise meetoodika ja faktid: täie

14C sisaldus

terreumiga PILDID

mini kui ECM seened Paxillus ja Rhizopogon.

es mehaanilises erosioonis ja vaid biotiidi leostamisel, arv ilma samblikuta on erosioon suurem, PILDID

elkõige Ca ülesvõttu

Intsia: Nagu enamus troopika puid, populatsioonid väheerinevad, pop sees suur varieeruvus. Diskussioon

veestress , eri seened, mõju taimekasvule, N, P sisaldusele. Eriseened mõjuvad veidi erimoodi

liigitekke mehhanismid: saartel suurem ökoloogiline võimalus, sama ka suure häiringu korral mujal. Polüploi

## Pleurotus eripopulatsioonid

berkuloidse ECM perioodiumis (mullas ja sees palju vähem)

uri, samas kui igal puul 1-2 seeneindiviidi. Üle pika maa Eostega levikul v oluline roll matsutake levimises, sest ISSR genotüüpidel pole proovipaiga järgi mustrit.

mikrolüljalgsete BD mõjutab taime kasvu vähesel määral, suurema liigirikkuse juures enam ei mõjutagi. Ka taastumine põuast sarnane madala ja kõrge BD-süsteemide udu sügavalt mullast või võtavad puujuured seda sügavalt üles; Rhizopogon jt +\_ sekotioidsed seened on vähese transpir-ga, ent Amanita raiska ECM seente ruumiline autokorrel: olem

300 random juuretippu/puu

sega. Mida mineraal-N rikkamal pinnasel kasvab seen, seda jõuetum on ta kasutama valke ja aminohappeid puhaskultuuris (Lact theiogalus) ja vastupidi (Cortinarius sj

ECM seente koosluste uuringuks on vaj

sekvenceritud 14 seene genoomis kõige sagedasemad dinukleotiidid mikrosatellidid: AC; AG; AAC; AAG;

itsentrist teise

x  
x (antag)

le, diskuss

ilestega, samas bakterite hõimk tasemel rühmad samad

võtta märgist glütsiini ja 15N taime transportida (rohkem kui kontr-taimes). Samas 13C ei lähe taime seene kaudu.

Cenococcum: eripaigus palju unikaalseid allele,  $\epsilon$ .

#### ECM vs AM

emates, ent väldib ka äärmusi. Eksperimentaalselt mõl eelistasid parasniisket. Arv EcM tõrjub AM välja sobivates tingimustes Ricos.

seentes on väga palju toitaineid vrd muu

sese kolonis-ga, HN hästi arenenud

rprod, ent kooslus v erinev. AM koosluse ühtlus suurendas P summaarset ülesvõttu . AM kooslused erinevad peremeestaimeti ja koosluseti ning sõltuvad, kas taim on r

monoterpeenid inhibeerivad EcM seente kasvu. Eri tühenditel samasugune time seeneisolaatidele. Saproobidele mõjusid terpeenid vähem

kandseente lakaasi geenide diversiteet mulla eri horisontides: suurim O-horis: seal pms saproobide oma, min- tused. EcM hulk suurenes vaid P. Albal (79%), AM 2-38%, jp 35-84. Suurenes juurte allokats miner-mulda ja ühtlasi C liikumine mulda

Laccaria monokarüoidid on mõned võimelised mood ECM



Laccaria>Hebeloma>Cortinarius anom

evolutsioon kiireneb liihenis vs mitteliihenis Omphalinadel -nii 28S rDNA ja ITSs eriti AA ja TT saitides, k

Fusarium: esinevad spets kromosoomid, mis kannavad edasi peremeeste nakatamise võimet; orhideedel Sebacia-Epulothiza anamorfidel monilinioids

Tuber sp

puud: iga 200 random (n=120)

O-hor 15\*15(n=3\*5)

15\*15\*5(n=3\*1\*5); tuhas vs norm

koesobivusreaktsi sagedusklassid

sel mullal mõl tek v vähe EcM. 2 eukalüptoi liigi vahel tugev peremehe-spetsiifika

Tselluloosi lagund supresseeriti koevol käigus. Pigem võivad taimed käituda parasitidna seentel, kontrollides neid ja vastutasuks lubades elada

Festuca stimuleerib Tuberit

cistaceae: Fumana, Tuberaria, Lechia A  
mükoriissed taimed kogu maailmas: üle  
% koloniseeritud, morfotüübid

enttsentrifugimine. 13C DNAs 2x, rRNAs 10x vahe

juurte ergost sisald ja "paksu mantliga ECM kolonis väheneb kui taime lehed ära kitkuda. Seos aastasisene. Eelmise aasta kitk juurte ergost sisald ja "paksu mantliga ECM

PCA ühtlustus vs reostustase  $r=3*O$  (n=5\*5\*4); sklerootsiumid, biom

ECM vs taim muutus taimsete hormoonide mõjul, kasvu kiirendab rutiin

Laccaria bicolor/ samal indiviidil 2 IGS2 alleeli, mis erinevad suure indeli poolest. IGS sisald v palju mikros

: viitab N-linge avatusele ja N rohkusele; mullaprofiilis troopikas vähem erinevusi (v.a. campina), mis näitab suht N-rikkust mullas

vaid kaptaan ei inh taime ja Pisolithus kasvu

% koloniseeritud

ainult benodalin vähendas ECM moodustamist istandikus; benodalin inh ECM seeni, benomyl vaid suurtes kogustes, PCNB inh Pisolithust aga mitte Thelephorat, capt

mullaniiskus: eriliigid käituvad erinevalt nile

% koloniseeritud

% koloniseeritud

% koloniseeritud

varajaste koloniseerijate ilmumine kaskede ümber: Laccar

koesobivusreaktsioonid: Paxillus: mänd vs lepp

Laccaria bicolor: algmete areng kasvatasku meetodil; Laccaria laccata: Petri tassis vermikuliidi ja männiga tekib küps viljakeha küpsete

Rhizopogon jt ma % koloniseeritud, klasside kaupa

on/pole

ms AUS-st. Amanita phalloides invasiivne. Saproobidel peremehe-spets madal

kraadiga ja keskmise temperatuuriga; 15N keskmise temperatuuriga ja sademetega (kõik opt-min kõveratena). Erinevused kõikjl. Normalis. Nul  
e 15N oli 6 promilli vaesem kui viljakehades ja N konts 2x madalam; Picea mariana N tuli keskm 53% seente kaudu (8-92%), ent see ei seostun  
ened kolonis pms kiiresti kasvavate pikkjuurte harusid, inokul seened aga lähedasi juuretippe

Pinus edulis Arizonas: 5 liiki Geopora-sarn seeni. Arv see tuleneb v põuasest aastast. AM taimede eemaldamine suurendas EcM kolonis

MR vs metallistress. Eri stressimaandamisvõimalused. Tuleb uurida eraldi niitaime kui seene adapteerumist, konstitutiivset võimet. Eristada mükoriisa üldkasu lisakasu

svott Alnus viridisel vrd mitte-MR taimedega; noodulid ise ei vott midagi yles

pH optimum Suillus ja Xeroc puhaskultuuridele ja M.R. silvestrisele u 5.0, M:r. Atrovirensile polnud vahet

taimeekstraktide mõju seenekultuuride kasvule

Tuber uncinatum ja Tuber aestivum on eri liigid ITS ja mikrosatelliit DNA põhjal. Erinevalt T. Melanosporum

DSE -ITS -, ITS erinevus liigi sees <2 (3%); liikide vahel märksa rohkem

transp seenest taime; arv ErM eriti ja EcM seened votavad pigem orgaanilist N otse varisest); mykoriisettes juurtes rohkem 15N kui lehtedes; Arv min N vahesus on ee %koloniseeritud kõik MR-tüübid

Mürklitel USA keskosas: viljumise ohtus sõltub niiskete päevade arvust 30 p enne viljumist. Viljumise algus sõltub mulla ja õhutemp-s risomorfide tekkeks on vaja kõrget O2 kontsentratsiooni j

peale põletamist taimekasv kiirem, ent mükoriisa teke aeglasem. Juuretippe rohk, ent kolonis madalam. Domin Wilcoxina peale põletamist taimekasv kiirem, ent t Cenococcum: taimeekstraktide, pH jms mõju puhaskultuuris

Wilcoxina EeMR eluiga u 2a Soomes, nonMR juuretipul palju vähem

istandikes konkurentsitingimustes

maaiseste viljakehadega seente eosed püsivad mullas kev

pH mõju seenekultuuride kasvule

massi mõõtmismetoodika vedelkultuuri

Arctostaphylos, Arbutus, pallides

koesobivusreaktsi sagedusklassid

koesobivusreaktsi sagedusklassid

koesobivusreaktsi sagedusklassid

ITS; LRoR, LR21; LR3; LR5; LR7; ITS liigisisene erinevus Ganoderma <2% üle laia geogr regiooni; liikide

veestressi mõjud

gridling

ergosterooli analüüs mikrolaine meetodi

tunduvalt väikemad konts.), Urea osatähtsus EMH-s v s EMH-s ekspresseeruvad mitmed geenid teisiti kui EcM-s. EcM-s ja EMH-s erinev N-ühendite konts. (EMH-

poud: Suillus hoiab taime kasvu kõrgemal poua ajal, ECM kolonisatsioon ei vähene, peale pouda palju kiirem taastumine

B: mitte lisades suureneb Cenococciumi osatähtsus

% koloniseeritud

NCI puhul Hebeloma crustuliniforme vähendab kuusel okastes NaCl konts. Ja võimaldab kordi suuremat vee konduktsiooni. EcM puudel palju suurem klorofüllide konts  
ECM seened suurendavad taimejuurte apoplasti veetransporti ja juurte konduktiivsust

Zn kaevanduste Suillus luteuse populatsioonid on sama kc Zn kaevanduste Suillus luteuse populatsioonid on sama kompleksed AFLP põhjal kui kontrollaladel

Tuber melanosporum: ITS sarn >99%; SCAR markerid ei oma mingit erinevust Prantsusmaal

Tricholoma matsutake: IRAP: seeneringid koosnevad mitmest genetiist. Arv. Et uued genetiid tulevad shirosses

ECM vs Tricholo arv, %koloniseeritud

Arv, N fraktsion toimub mikroobne N transform, N ylesvotul taimesse, **eri taimed kasut eri N yhendeid, eri taimed votavad N eri sygavusest (er pinnavesi erinev )**

viljakehade biomass liigiti erinevates tai

10x10x10, 200 rnd tippu  $n=3*4*3 + 3*$

na, Laccaria spp. Cenoc. Salix reinii idanditel, mis moodustasid vörgustiku vanemate taimedega: efektiivsus biomassi, N, P osas korrel v tugevasti, ent seda ei mõj ülds

id, ECM seened eelistavad glc fru-lr; Glc inh Fru

lõhestunud populatsioonid geneetilise mitmekesisuse (heterosügootsuse) mõõtmine  
kaasaegne pop gen mitmekesisuse e heterosügootsuse mõõtmisviis: indiviide võib olla vähe, ent lookusi vaj

ECM kolonis vähendab lehtede herbivooriat putukate poolt. Arvatavasti sõltub ka herbivoori tüübist ja spetsialiseeritusesrt

Korupi taimeistik: domin EcM tsesalp. E

mel kolonis, ent vähendab teiste liikide oma; P ja eriti N väetamine vähendab EcM kolonis

%koloniseeritud

b koigi mono-ja diheksosoidide kontsentratsioon, eriti sahharoos ja trehaloos; aastaajati koigub enim rafinoosi sisaldus, toustes maksimumini talveks

veeseente proovid taimelehtedel

N ja poud ei mõjuta ECM kolonisatsiooni ega liigilist koosseisu

endil kui toiyu on vähem (mõõtmistehnika kahtlane, saproobide lahutamine peale proovide pikka seismist!!!); ErM+ECM biom: ErM+ECM biomass suureneb lokaalsel EMH mootmine f EMH: viz vs PLFA

ireneb mullas sygavuti, vaetades muster teine; vaetades manni okaste 15N touseb; Arv ureaga põhjustab frakts NH3 lendumine; Soovitavad kasut nitraati vaetise moju

ado) ja Tricholoma 4 spp mood EcM; Lepista 2 spp, Calocybe ja Melanoleuca ei mood.) Lyophyllum ja saproobid on v erinevad laguaktiivsuse j

aseksuaalsete org vs seks org DNA: mutatsioonid, genoomi ülesehitus. Aseks org püsijäämise eeldused ja

endobakterid

kaptaan ja benomüül vs ektendo ja AM

taim

ohtrushinnang

Fusariumil ja selle teleomorfil Gibberellal on mitteortoloogsed ITS sekvensid



kottseente mükooside vastu: nimed ja mõjuviis: ergosterool, EF2, kitini süntees, valgu süntees jt

vs N-väetamine: väheneb; aastati väga v

Lyophyllum shimeji võime produtseerida viljakehi ilma taimsümbiondita  
Hebeloma spp võime produtseerida viljakehi ilma taimsümbiondita

hübriidide teke, ohtlikkus, eeldused

, EMH kasv: ülevaade

ECM vs AM: EM ECM vs AM: EMH ehitus, RM, transp  
Suillus+Gomphidius

rasvhapped: bakterid vs seened

% koloniseeritud

amariensuga. Gnetum võib fasilit Amhersteae kasvu

ECM mantli, korteksi ja steeli läbimoot

antioksidandid Cd vastu -glutatioon ja Cd kiire vedamine vakuooli S-prot abil

Pseudotsuga istutatud raiesmikule

mükoriisa isolaatide määramine kultuuritunnuste

kask. 3 levikutsentrit peale jääaega: Uural, Alpid ja Louna-Skandinaavia, cpdNA põhjal; programmid

metallireostusala

tulenevalt metallistressist

$r=1*20(n=3*6*3)$

**Buchwaldoboletus lignicola** toodab puhaskultuuris fertiilseid viljakehi, peetakse seetõttu saproobiiks

Suilluse agrobacterium-transformatsioon

tundlikumad kui muld pärast häiringuid; pms mõjutajad taimedele: maakasutus (sajandeid), liigisisesed var, MR assots, kliima eriti sademed; E  
Et parim korrelatsioon on d15N vs nitrifikats/mineralisats

'a

svu vrd vermikuliidi ja sterilis varise lisamisega.

suugal ECM. Kas k C, pole teada

**Rhizopogon: ei leevenda veestressi**

$><50\%$

s OK ent v varieeruv; alginaatgeel ei kõlba, steriilne ettesintees ei sobi, sest ECM arv kahaneb kõvasti. Parim turvas+vermikuliit kasvukoos, ent ettekasv aeglane, ku

1 pot, seda väiksem oli diversiteet. Muutus ka koosluse str. Arv CO2 rikastatus võimaldab uutel liikidel invadeerida olemasolevat süsteemi

: str muutuvad. EmH: Tylospora D, TheI; EcM: Russula G. Kokku domin Theleporoid 63; Sebacina 11; Russula 9

erikoidse MR retseptoritel

**Glomus etunicatum** on polüploidne seen, mille igas tuumas on mitu ITS varianti. Kontsertevolutsioon ei toim

**Armillaria: diploidne** mütseel ja haploidne viljakeha

Cortinariaceae (sõsar arv Gymnopilus) jaguneb kolmeks kindlaks klaadiks: 1. Cortinarius+Thaxterogaster+Hymenogaster pp + Protogla

taimede geenitehnoloogia ülevaade

PLFA  
otsene DNA amplifitseerimine

N, P

ECM-seentel N-inhibitsioon

1 random juuretük: n=1600 ;osakaal, t

Kandseentel Sümpatrilisi mikroliike üllatavalt palju. Allopatrilistel liikidel pole olnud arv vajadust tekitada ri

O<sub>2</sub> transport veestressis jurte kaudu: mänd -läbi ohukanalite steelis; kuusk -läbi koore (palju aeglasem ja vähem efektiivne)

delite puhuks korrektsed mass-tasakaalu valemid koos usaldusintervalli, SE arvutamisega. Proge.

delite puhuks valemid, mis arvestavad allikate C, N jms konts erinevusi

delite puhuks korrektsed mass-tasakaalu valemid

EcM puudel üldiselt madalam pH kui AM puudel risosf vrd bulk soil, ent see võib olla okaspuude" efekt. Risosf pH korrel tugevasti vihmausside arvukuse ja N mineral

EcM-Rhizopogoni efekt männile sõltub genotüübist ja on päritav, sõltub ka mullatüübist - ar  
Phialocephala fortinii: ITS2: Canadas lõunast põhja ei erine genotüübid; põhjas on rohkem klaade esindatud

vaadeldi, et Taimed ja Cenococcumi ECM peavad vastu pikale põuale, ECM küll ei suuda piisavalt vett varuda, ent arv suudab paksude seintega vastu seista kuivamise

AM-seentele

imid, mis lubavad taimede rakuseina lagundada; Geenid, mis kodeerivad EcM teket on Tuberil ja Laccarial üsna erinevad. EcM seened on mir

sümbioosigeenid

apealsest varise 15N vaartustest; 15N prop kasvab sygavuti, d13C sama mullaprofiilis; vt vajaliku mat hulk!

helas. Troofilise taseme fraktsioneerimine järvedes on C: 0.4 promilli; N 3.4 promilli. Uuritavad liigid ja kontroll peaksid olema fülogeneet seotud; järveökosys-s vaja h

seente fitness seente fitness

seente fitness

x

Alnirhiza cystidiobrunnea: kultuurimorfologia

fluorestseerimine hindamaks vitaalsust  
viabiilsus: variabiilne ajas ja ruumis, sol

poud: tamme stüvajuured votavad vaid öösiti vett üles ja translokeerivad seda vaid AM ja ECM seente, mitte parasitide hüüfid hüüfipikkus/cm3

%koloniseeritud morfortüübiti

taimekasv

juhuslikel juurejuppidel %koloniseeritud  
puud

ääramine bakteritel, hilisem funktsionaalgeenide otsing

substraadi rikastamine 13C-ga, 13C ink

u kaevanduspinnasel, suurendab mikroelementide ülesvõttu üh/taim; mitte üh/g taim

OrM: seemnepaki meetod: nailonitükk+seemned filmiklap

xxx

aalse võõtme C ja N ringes. Omastavad eelistatult aminohappeid mineraalse N üh asemel ja suudavad mõnevõrra omastada N kitiinist ja muudest kompleks-or-ühendite  
n, juur vms) ja veidi C

arktikutaimedel +-

esineb EcM sagemini kui Casuarinal, noodulitega on lood vastupidi. Noodulite teke sõltub paljuski mulla P sisaldusest

gium levinud mineraalmullas, valged ja pruunid tüübid orgaanika vahel.

liigisisene ITS

parasiit vs sümbiont

endof Curvularia vähendab termostressi peremeestaimel nii 40°C kui 65°C juures.

del

%koloniseeritud

isendisisene ITS varieeruvus 0...0.6% (3 b)

ECM moodustub mändidel koige parem

vaid POD-ga seeni tuleks lugeda valgemäd tekitajateks. Jaapia ja Botryobas lagund ligniini, e

nata aladel

taimed, mükoriisaseened vs globaalsed muutused: ülevaade

%koloniseeritud (puu, juuretipud)

ingamist ja muidu transporti. AM ja ECM seened võivad ses suhtes ka erineda  
la kõrgem on lehtedes 15N

mükoriisofääri organismide roll bioremediatsioonis, võimalused, GMod, taimede juurde toomine

glyciosmus v sage trentsi s  
trentsimine vähendab EcM seente VK produktsiooni. Lactarius glyciosmus v sage trentsi servades ja NM??? Entolor  
pärast trentsimist kadusid viljakehad. Lactari glyciosmus viljus eriti kaeve ääres

üheainsa Pisolithuse tüvega ECM moodustamine sõltub männil tugevasti seemnepartii päritolust. Eriti tugev:  
taimel ja seenel ECM moodustamiseks rohkus genotüübi arv ja % sõltuvalt taime ja seene genotüübi

taimede varis: Cenoc reageerib kõigile pos; Cenoc > Laccaria > Pisol > Rhizopogon puhaskult; ECM-dena männil Rhizopogonit inh kõik variseliigid, ent ebatsugaal m



isonti rohkem 14C, kas ka prop, ei tea.  
rimineraalidele eriintensiivsusega

EMH kvantit hinnang autoradiograafi

Terfezia boudieri ja T. Pfeilii viljakeha isolaadid c Terfezia boudieri ja T. Pfeilii viljakeha isolaadid omavad r  
Tuberaceae-suur liigisisene ITS polümorfism

Laccaria amethystina: pop-gen põhjal popid ei eristu peremeestaime järgi ja 500 km skaalas c

SCAR praimerite konstrueerimine AFLP ja minisatellit-probede ning sekveneerimise põhjal Tuber magnatum

Nii MAT+ kui MAT- genotüübid suudavad VK i Tuber melanosporum: veget faas haploidne, mükoriisades vaid 1 MAT-tüüp; VK gleeba on al

IAA sünteesi aktiivsus puhaskultuuris

%koloniseeritud

Eri seentel ka rasvhapetel eri fraktsioneerimine. Troofilne frakts veidi neg või veidi pos; Collembolad, kes seeni söövad, on mõjutatud ka seeneliigist ja C3, C4 taimesu  
137Cs/134Cs erinevus mullas näitab seente mütseeli paiknemist samas mullas VK sisalduse baasil; saprotro 137Cs/134Cs erinevus mullas näitab seente mütseeli paikr

M, v oluline site-efekt

juhuslikud juuretükid: osakaal

AM seente: Glomus cf intraradices ja Archaeospora sp ko

ECM juuretipu eluga keskm 139 päeva, viited suurele mõõtmiste varieeruvusele (kuni 5 a)

okaste rookides asendusid rismorfirikkad tüübid siledamate tüüpidega, seente biomass ja penjuurte mass vähenes, kolonisatsioon 100%

eri sookooslustes 2 aastal

katumist; ilma taimeta Melamp suri; Melamp ei takistanud EcM teket

% segmente koloniseeritud

kasvukiirus agaril : vs pH, temp, veepot

utamiin>glutatioon=valk=NO3 söötmeil. N-ühendite kasutamine polnud seotud kasvukoha N ühenditega. Membraanil vedelsöö ECM seened kasvavad reeglina palju p

MHB lagundavad petrooliiumhi

herbivooria stimuleeritud: efekti tugevus sõltub töötuse ajast ehk eri herbivooridel on ilmselt eri mõju EcM seentele

metsaseente kasvanuse edendamine rev

A. muscaria

Cortinarius sp liigisisene

A. muscaria liigisisene

seente liikidevaheline hübriidiseerumine: uued peremehed, suurenenud virulentsus, AM-seened Epichloe vs N

supressioonitsooni laius

oris -arv et liiguvad eluea jooksul ringi. Vihmaussid eristusid toidu ja elupaiga jargi

15N ülevõtt, Pisonial sh suht madal -arv. Tomentella pole eriti efektiivne

N muustrites; EcM taimed, mis kasvasid proteiinil, olid 15N-vaesemad kui proteiin ja glutatioonil kasvanud taimed olid 15N-rikkamad kui gluta taimede juured olid 15N rikkamad kui pealsed, mitteMR juurtes ja pealsetes sama. Mullaprofiilis 15N ei erinenud. Vaidet toimub 15N diskrimin N transpordil seenest t gnatuur, mis tuleneb arvatavasti N transpordist läbi seene, mitte eri N ühendite omastamisest. Amino-happeid võeti üles väga vähe, kuigi need o NO3 rohkem. Erinevus taimede vahel, mis omastavad rohkem või vähem NO3Mussoonmetsa kõrgemad 115N väärtused võivad tuleneda kõrges

aastati, kogu liigirikkuse ennustamine indeksite abil

frekvents vs biomass

peremeestaimest; v tugev korrel puuvooriku ja peremehe 15N vaartustel. Puuvooriku 13C 2 promilli vaiksem kui C4 peremeestaimedel, ent 10 promilli vaiksem kui CAM

dif. Invas seeneliikide identif on v keeruline sest 1 raske identif morf liigikonts jr, looduslik biogeo on väheuuritud, endeemseid liike vähe teada, liigikonts jama. Arv ba

õrge 15N väärtus võib tuleneda kitini lagundamisest

IGS rekombineerub meiosis; IGS1 heteroduplekside moodustumine tandemjärjestuste tõttu PCR1

viljakeha

Leccinum duriusculum: noores metsas suur genet, Leccinum duriusculum: noores metsas suur genet, vanema

Rhizoctonia: haploidsed vs diploidsed

607,610,615 (var)

una vähendavad mulla org-aine sisald. Taimekasvu ja mesofauna rikkuse ning kogu biomassi vahel ei tuvastatud seost. ECM ei stimuleerunud ühegi mesofauna taksoni biomassi

tel: org N parem kui anorg N

Pisonia grandis mükobiondi kasv eri N

põud ei mõjutanud ECM koostist ega ka ergost hulka, ent keskmiselt suurendas N-kehade hulka, mono- ja disahh hulka, vähendas glükogeeni ja tärklise hulka; X. chys

Cenococcum sp rDNA ITS ja intron  
Cenococcum ITS 2D struktuurid

ab lehtede vananemist

%koloniseeritud AM

el vastupidi ja sügisel PsTsuga -> Betula; vastavalt sellele, kellel on anda! Metaanalüüs valguse mõju kohta MH ja autotr taimedel ei andnud olu

V, C, N, P ülekannet taimest taimesse

batsuga oli varjus, liikumine mööda N, C gradienti  
sünteesi aktiivsus kontrollis kõrgem, korrelatsioon seente liigirikkusega

rd 100 juuretippu

ühel haploidsele seeneindiviidil mitukümmend SSU, ITS, LSU tüüpi. Enamus unikaalsed punn

eri populatsioonid Maailmas

kultuurimadused

vähem

Manause läh ülenjutatud aladel (valge liivaga, toitaineterikka settega) puuduvad EcM taimekooslused, kuigi v üksikud Amanita nauseosa, Gyrodon ja Pulveroboletus

M

pind: r=2m; n=900; Piloderma: esinemi:  
x

is-tüüpi mükoriisat. Paris-tüüp on vähem efektiivne taimekasvu stimulaator ja P seisukohalt. P omastamine ei seostu skolonis, kasvu stimulaatoriga. Seente kaudu toimub P saami

EcMga. Arv selektiivraiega aeglaselt surevad dipterokarbid tulenevad EcM seente suremisest peale raiet.

seene mütseeli biotseeni mütseeli biomass kõigub sesoons

rDNA koopiate arv on erinev ja pikkus isolaadiselt varieeruv Agaricus bisporus eri tüvedel

liigub lehest hüüfi tunni-paariga AM tipuhüüfide eluiga 5-6 päeva, jooksevhüüfidel pikem. 14C järgi. AM tipuhüüfide eluiga 5-6 päeva, jooksevhüüfidel pikem. Arv et reost pinnast koloniseerivad lokaalsed kõrgema vastupidavusega EcM seeneliigid

transgeensete taimede mõju: pms neutraalne, harvem negat

raskemetalle (Cs näited) akumulatsioonid ECM seened rohkem kui saprotroofid. Substraadist saavad seened kätte 10x rohkem Cs kui taimed; ECM taimedes vähem Cs,

253

249-250dif

ei usu et ECM seente dikartiootsed genotüübid inkorporeerivad endisse haploidseid eoseid et säilitada potentsiaali, sest Hebeloma, Laccaria, Thelephora mood ECM ka vee all olevatel juurtel, Suillus spp mitte. Samas olemasoleva ECM ülejütamine ei tapa mükoriisasisid. Suillus spp EMI

patogeen *Zymoseptoria pseudotritici* on tek kahe patogeeni ristumisel u 380 pölvk e 200 a tag  
AM seente intronitele ja LSUle multiplex PCR. Spoorisest var ei tuvastatud, liigisisene var palju suurem kt

benomüül ei lase agarsöötmele välja kasvada enamustel ECMs olevatel kottseentel, teisi inhibeerib tugevasti; ei mojuta kand-ega ikkesseeni % koloniseeritud

Suillus bovinus: võimaline absorbeerima hüüfidega Rb, suhkruid, polüoole, glutamaati, vett, mitte oksaalhapet; eritama oksaalhapet, eriti inositooli, peptiide, rythmA geeni tuvastamina *Laccaria bicolori*l, mis interakt AP180 regiooniga. Toimib mükoriisas vesikulaartr

kooslus erinev, põuakahj ALADEL v sarn, mujal mitmekesine; % kolonis kõrgeim keskm-kahj puudel  
% kolonis põuakahj ALADEL madalam  
Laccaria ssp liigi-ja perekonnasisene

Laccaria vs Fusarium,

peremeestaimel moodustada ECM  
eesi 1)toimub siis kui taimedelt ei saa C; 2)lagund selleks, et kätte saada min-aineid, mitte C; 3)siis kui just palju C liigub juurtesse

arv vajab Boletus edulis viljakeha tekkeks 3,5-14M EcM tippu või 363-1800 km EmH

el, peremeestaimede vahel. Suur N konts var; Theleporaceae -v korge D13C ja C konts ja D15N; Chalciopus korge D13C; Agaricus spp, Collybia sp -v korge D15N, :st pealsetesse oli minimaalne; Aminohapete ylesalla transp on kas yhendispetsiif voi hingatakse Gly-st tulnud C lihtsalt välja; Igatahes on iga lisa C suureks abiks toitumustris liikide vahel ning jala ja kybara vahel arv setottu et kybaras on rohkem N aminoh ja valkude naol; kitiini, valkude ja aminohapete 15N erinev eri liikidel; kuivat arv morfotüübiti  
Laccaria amethystina liigisisene  
arutelu liigiti  
proovide hulk ja sellest tulenevad proble

elluloosi konts

r=5\*40 (n=3\*5)

mittesuguliselt paljunevate seente populatsioonigeneetika: Ophiostoma, Armillaria, Mycosphaerella, Gibbere

Liigikriteeriumid seentel ja kuidas liikide arv kasvab morf<biol<füü. Krüptilised liigid, näited

ritud nitrifikatsiooniga ja mineralisatsiooniga (posit)

korrel taimkasvu ja EcM kolonis vahel, teistel pole

õhusaaste inhibitsiooni põhjused reostatud piirkonnas  
10kg/ha N03

hulk liigiti

r=1,25\*13(A)(n=10\*25); koguarv, Cenoc  
koguarv, %koloniseeritud  
r=1,25\*13(A)(n=16); koguarv, %koloni

õttu, et niidul pole ECM-seente inokulumi ning närlised, mis muidu seeni levitavad, ei rända metsa ja niidu vahet. Metsas ja niidul eri liigid. Per üleujutus iseenesest ei

sest ega fotosünteesitava C kogusest, ent on leeb seeneliigist (Rhizopogon > Wilcoxina > Cenoc). Transport toimub kui süsteemis on häiring ja t

pH mõju EcM seentele ja EcM moodustumisele: opt 5.5-6.5. Wilcoxina domineeris kui pH>6, muidu domin 'valge' tüüp  
temperatuur: Rhizopogon ja Suillus opt kasv puhaskult ja EcM mood 25°C

must kui värskete eostega.



1 rohuvaadel väga madal inokpot mändide jaoks

bakterite ja aktinobakterite suktsessioon juurtel ja mullas erinev; veidi erinev ka peale Ps. Fluorescens inokul ja fungitsiid imazalil kasutamist. PsF ise vähenev aja jook

Phlebopus: sklerogeneesi - sees polyfosfaadid ja glykogeen

arv

peremees-parasiidi interaktsioonide modelleerimine metapopulatsioonide tasandil: pole superpatogeene; pato

kui ECM

695, 696, 699,

318

ist, kuna ühed seemned induts teisi. BD efekt suurem tselluloosil vrd keerukamatel ühenditel

tugev seos EMH koguse ja taime P vahel

EMH kvantit hinnang skanneerimise ja

d võivad 2000 a jooksul muutuda. Arv et monodomin kooslused toimivad läbi positiivsete tagasisidemete

ikad ja vihmaussid neelavad eoseid, ent selle mõju idanemisele pole teada

Risomorfide eluiga EcM seentel keskm 11 kuud ja seda ei mõjuta N Risomorfide eluiga EcM seentel keskm 11 kuud ja seda ei

audu välja

iondid eri vanuse C-ga eri N-režiimi all, väidavad, et ECM-seened saavad viljakehade C taimedelt kohe, eri sümbiondid eri vanuse C-ga eri N-režiimi all, ent mõõtmis-  
la siiski aminohappeid omastatakse, ent sealne süsinik läheb hingamiseks

sadesse

b CO2 mõjul: metaanalüüs

%kolonis on vähereageeriv tunnus väet

Rongas ja beeta-sidemes aeglasem

juurepikkus kolonis ECM ja DSE kasva

lavad, et arv toimub seene rakusisaldiste purskumine taimerakkudesse, mistottu on MH taimes rohkem D15N; võrdluseks ka muld, CWD, muud taimed;

ragu sealsetel taimedelgi; Cortinarius sp ja Chroogomphus spp saprotroofi-laadsed mustrid. Saprotroofidel jagunes ära kõdu, va 13C ja 15N: arv Phaeocollybia ECM; C

Terfezia suurendab Helianthemumil transpir ja FS aktiivsust, klorofüll a ja b kontsi

raskemetallide sagedusjaotus mükoriisa eriosades-koondunud mantlisse ja risomorfi

raskemetallide sagedusjaotus mükoriisa eriosades-koondu

vedelkultuuris kasvatatud puudel olemasoleva EcMde mantlid hävinevad, säilib vaid Hartigi võrgustik. Vee all tekkivad uued mükoriisad omavad vaid Hartigi võrku.

hüdrofoobsus vs hüdrofiilsus-mütseel: vee, pindaktiivsete  
hüdrofoobsed matid: kuiv, palju õhku, kiirem lagunemine

sõsarliik. NJi analüüs sõltub rohkem aligneeringust kui Bayesi meetodika, ent resolutsioon on palju parem (arv liiga julge); täisautomaatne alig

PCR produkti pikkus: 18CrDNA ja erinevus kõiksugu organismidel otsene DNA amplifitseerimine  
krridi-tertsiaari piirid krridi-tertsiaari piiril peale asteroidi mõ

mittesüsteemiline

ECM seente E-horisoni kivimite lagundamine ja metallide vaesustumine/rikastumine, orgaanilised happed mullas

esel saartel. Ka kaugusega väheneb koosluste sarnasus 10 -2000 m skaalas

taimel ECM efektiivsus

% koloniseeritud+morfotüübid

arv / juure pikkus

ECM vrd AM %koloniseeritud

eraldi arbuskulid, vesiikulid, hüüfid

: mõnedel taimedel

duktsiooni ning ka lagunemist. Oksalaadi hulk seotud enim hingamisega, EMH kogupikkusega. Vaja mõõta eraldi juure ümber. Ei eristata hapet ja sooli  
:taati, siderofooridest ferrikrotsiini, vähem ferrikroomi. Arv et oksalaadi eritamine võib olla oluline C tõmbaja

ECM seened ja mänd eksud oksalaati, malonaati ja fumaraati. EcM seente juurdetoomine süsteemi ei suurendanud kogu org-hapete prod, kuid muutis kvaliteeti. Paxillu  
1 NM mänd kiirendavad mükoviidi ja hornblende lagundamist, Pax invol kiirendab eriti muskoviidi lagundamist. Kätesaadud K ja Mg talletati hüüfides ega transatut t

AM: freq; %colon

omtoit>kodutoit, taksonoom kuuluvus, elupaik magevesi=maismaa>merevesi,

raskemetallide sisaldus viljakehades Lapimaal: sulatite ääres kõrgem

% koloniseeritud

hartig net/cortex, mantli d

% koloniseeritud

Al: AIPPP teke, kelaatimine, seen talub üsna hästi

Piriformospora indica -sarn 18S rDNA Ceratobasidiales [1

total DNA mullast

Pleurotus ostreatus kompleks: ristumise baasil morfoloogilised liigid on samad bioloogilised liigid, bioloogilin

%

osakaal

5\*5\*20 (n=5\*6)

, S tsükleid, levivad tehnogeensed ühendid ja raskemetallid. Globaalne soojenemine toimub pms foss kütuste, N akumul väetamise ja metsaraie tagajärjel. Enim on bio:

Piceirhiza-Hymenoscyphus: taksonisisene

nine Sarcodes sanguineas, aga mitte teistes taimedes.

%koloniseeritud

1cm lõikudel %koloniseeritud

sügavusjaotus ühtlasem kui tammikus, üldse kuni 70 cm süg olulisel määral. 13C mütseelis sügavuti sama, ag EMH kuusikus vs EMH kuusikus vs kuuse-tamme segame  
tuvastamine PIXE analüüsiga elementide tuvastamine PIXE analüüsiga  
eriECMseente riomorfid sisaldavad erineval määral raskemetall ja muid elemente: PIXE analüüs. Tugev solt eriECMseente riomorfid sisaldavad erineval määral rasker  
lt pinnase toitainete sisaldusest hütüfide, ECM eluiga ergosterool vs kitiin, valkude sisaldus aa  
mütseeli sesoonsus ja eluiga, kasv söelkoti-sissekasv; ergosterool, rasvhap

mini

ähem

K, Sr ülesvõtt on tihedas seose .

ergosterool

ergosterool

trambitud pinnasel ergosterooli sisaldus

e juuresümbiooside teket

populatsiooni-ja liigisisene: puud, ülevaade

ECM puud austraalias: Myrtaceae, Cast

ne; taimedel mikrosemned; AM induts koigi liikide kasvu tugevasti, vaid moned Pezizales spp. induts paari liigi kasvu (Lobelia gibbosa, L simplicaulis) juhul kui need

R)

Endogone, Sclerogone mood ECM. Mõned Endogone liigid mitte-MR; üks spetsiifiline vaid männile, teised v apljud Austreaalia taimed

Muciturbo ja Ruhlandiella mood viljakehi puhaskultuuris koos eukalüptiga

a) tugevas korrelatsioonis lehtede algse N sisaldusega. Taimeliikide lehtede segamise efekt idiosinkraatiline

PLFA

htest

seente-bakterite suhe sõltub enim

ke; arv. et seened mängivad rolli orhideeliikide ko-eksisteerimisele

on kandseentest algelisim ECM seened jt on kaotanud ECM võime sekundaarselt

viljakehade väheneb kui väetada: Cortir

pH 5.7 juures, pH3 sama), Cenoc (stimul kasvu pH 5.7 juures, pH3 mitte, sest polnud ECM).

Paxillus obscurus isolaatidel v erinev mõju taime kasvule ja mullahingamisele. Suurem

ing uude taimesse on ef-sem ja pikaajalisem kui invest säilituskudedesse

ECM püsivust soodustsobivaima partneri valik, pseudovertikaalne ülekanne (lokaalne levik), vastastikune üksteise ärakasutamine

Coriolus puidul

kottseened Antarktika maksasammaldes

ente liigirikkust; eri EmH-liivaproovides biomass jäi 0 ja 5.6% vahele (keskm 2%) RT-PCR põhjal

Amanita phalloides invad N-Am:

%koloniseeritud

isolaadi anastomoseerunud rametite piires aga toimub.

ECM seened juur klaaside vahel %pinnast koloniseeritud

tüüpi. Alleelid olid alati haploidsed SSCP järgi

**Cenococcum: levib primaarse suksessiooni aladele** vegetatiivselt. Lähedastel aladel mõned identsed genotüü

ini lagundada glükoosamiini ja atsetüülglükoosamiini ning nende tanniniseerunud ühendeid. Seepärast arv, et saproobid on vajalikud mineraliseerijad, kust EcM seened ödelnud saprotoofid. N limiteerimisel N peremehesse ei transpordita

liigikiiteerium ITS >99% id

juuretippude arv meetri kohta: segamän  
liigikiiteerium ITS >99% id; metsas EC

erikoidse MR see erikoid: %segmente koloniseeritud

**heterotallism on matsutakel. Distsantsiga suureneb** geneetiline erinevus pop vahel, ent kõrguste vahe pole olul

15\*15\*10 käärid  
5\*5\*5 (n=64\*2)

potis

%koloniseeritud kasutades erimeetodeid

kuna varustavad vajalike mineraalidega  
protroofidele. N-troofsuse jaotused

biomass kolbis (?)

**Wilcoxina mikolae** polüspoorne kultuur on võimeline viljakehi tekitama sümbioosis peremeestaimiga 4 kuud peale inokuleerimist klaasi



% osakaal

Basidiomycota, girdling: Helotiales, Serendipitaceae, Ganodermataceae. Bakteritel muutused väiksemad: vähenesid alphaproteob ja Acidob

mõju ECM-le

Tuber porchii: 4 aasta toodang

% koloniseeritud  
% koloniseeritud

stariuse osa kõdust, sest peenjuurtel ja mükoriisadel eri muster. Viljakehades fraktsioon suureneb jalast kübarasse ja lamellidesse. N-limiteeritud sü  
Peenjuurtel ja EcMdel v sarnane 15N ja 13C muster, v.a. 15N talvel EcMdes 5promilli kõrgem

Tulasnella, Thanatephorus ja Ceratob v harva patogeensed

2 trühvli liigi sünt 2 trühvli liigi sünteeritud EcM morfo

populatsioonidinaamika, geneetilise distantsi, populatsioonijagunemise teooria, metoodika, kitsaskohad: ülevaade  
*Mycosphaerella graminicola*: vt pealkiri, levikutsenter Lääne-Ida

na, seega seda ei saa kasutada seente elusbiomassi näitajana

ergosterool ei lagune mullas ei puhtal kultuuril

ants, isolatsioon, vähem kui fluktureerumine ja C üleküllus. Kui isolatsiooni pole ja C heterogeensus väike, on tugev konkurents ja log-normaaljaotus, kus üks neist on, siis

%koloniseeritud

RAPD põhjal: Suillus liigisisene

as. Aastast flukt seostati, et eri genotüüpid toodavad viljakohki eri aastatel  
ste levikutena

kalmia allelopaatilised ühendid .

ueaga



sõõtmed looduskaitse fakte

ärineb S-Am Nothofaguse ja Cyttaria juurest, ent korra levinud Põhja-poolkerale ja seal hiljuti radieerunud. Paljud teised tööstuse pärmid on hübriidid

hüpoteesi. Taimkate ei mõj kumbagi analüüsi.

casvab, EmH biomass max 10-30 a metsades enne hõrendamist

spergillus sp, kus >1% sekventse tunduvalt erinevad.

: GM, Kurtzman CP, Landvik S, Leavitt SD, Ligginstoffer AS, Liima

ntsed. Arv. On tegu vana hübriidliigi, mitte korduvate uute hübriidisündmustega, sest s. O laialt levinud. Need 2 ITS tüüpi on sarnased eri biol liikidele

ega mitte. Mõlemaid genotüüpe vaid 1 (pseudorepl)

saaste vs viljakhad

del AI vähendas P omastamist. Hebeloma ei talunud AI  
d toitainetevaeses kk-s, muutuvast kk-s ebastabiilsemad

ek 20 p jooksul peale idanemist metsas. Kontakt elus juurtega v oluline nakatumiseks  
all: 1 kuuga, mida lähemal suurele puule, seda kiirem kolonisatsioon

;, Euphorbiaceae (Uapaca), Caesalpiniaceae, Fabaceae (Pericopsis), Myrtaceae, Nyctaginaceae (Neea)

;; ülevaade

;%); risomorfide eluiga u 7 kuud

PDA

hübriidide tüübid, näited, kaitsevajadused

ui sügisel, väheneb org aine kasvades. [Arv kevadel nooremad juured]

nte liigirikkus. ECM peremeestaim on juurde pandud meelevaldselt ilma igasuguse maasisese vaatluseta

nulgudel mullal kus orgaanika eemaldatud

e linnulennult üle mägede

a, Sebacina, Thanatephorus, Ceratobasidium eristamine dolipoori ja parentosoomi ultrastruktuuri järgi, kultuurimorfoloogia, sh skleroosiumide jrk; Sebacinad 1-või 2-tuumalised

MMN

mardikate ja põrnaiakate BD Hondurases ekstrapoleerimine Chao2, jacknife ja bootstrap abil. Proovide arvu suurendades suureneb Chao2 pooltel juhtudest (vahemi

lel ka vähenes (Paxillus). Pigem vähenes varase st seentel ja kasvas hilistel seentel

N-väetatud metsas väiksem kui muidu, efekt eriti tugev väheviljakatel aladel



ECM langus Lääne-Euroopas  
ECM seente kaitse, osa maailma toidumajanduses  
xxx

iet

nad DNA

$5 \times 20(2)/2(n=3 \times 5)$

ole eriti usaldusväärne

MMN ei lämmastiksisaldusega: ei avaldanud erilist mõju ECM vs mikro- ja makrosaprotoofide antagonismile

st kohe PLFA18:2w6,9 ja ergo ning sellest lahut maha, mis peale inkub alles jääb. Leiti, et PLFA reageerib kiiremini, s.t ergosterool lagun aeglasemalt; inkub väheneb ka bakter  
ri keskkonnad  
sterool

looduslike rohumaade taastamine: aastati muutub üldkatvus ning eri taimerühmade osakaal: kõrreliste hulk, juurte biomass, mikroobide biomass kasvab, rohundite o

.18:2w6,9 on parem kui ergosterool ja qPCR: olemas suurel hulgal kandseentest, ohtralt, liigiti varieeruvus väike. ITS kooptate pg DNA KOHTA! Var.

**Tansaania: Katavi** NP dominCombretum jt mopane puud. Kasutataval maal basaalpind, puude arv ja BD suurem kui kaitsealal -arv et tegu on kahe koosluse seguga

n suks aladel lepa, Equisetumi ja Rhacomitriumi risosfäärides vrd teiste taimede ja palja mullaga

**peroksidaasid vs** kemikaalid valge-mädanik-seentel. ülevaade, JOONISED, kineetika, pseudokineetika

le algme moodustumist, suutes ilma peremeestaimetagi kasvada

**delta C13, N15, S34:** ohureostus mõjutab tugevasti metsi, delta N15 suureneb kovasti taimedes ja huumuses; S34 leostub kergesti

tanniin: Hymenoscypus: suudab lagundada paremini kui ECM seened, siiski inhibeerib kasvu, ent stimuleerib PPOde aktiivsust  
proteiin-poliifenooli on ErM seened võimelised lagundama, ent ECM seened mitte  
piiratud N-ga MMN

tsioon Rootsis

uleerimine pole veesentel usaldatav

i väga väike erinevus, arv tegu pudelikaelaga viimasest jääajast, arv põhj viljakehade hiline valmimine  
varieeruvus kasvab puusisene < puudevaheline < paikade vahe; ent distantsi kasvades nii puupiires, puude vahel samal pollul kui eri poldudel ge distants ei suurene. Üldse polün

agar

guarv N-jaot tõttu

tungi. Arv on www eriti oluline varjataluvatele EcM puudele

Uus-Kaled sklerofüllimetsad on hävimas  
t aminohapete omastamist

PAH degradeerimine ECM seente poolt -vedelkultuur, suur soltusus substraadist  
M kolonisatsiooniga

iksem põllu kui niidumullal

ained: 35%

I alal AUS troopikas

ga, seejärel tekib hartigi vorgustik ja paksem mantel, juurekarvad kollapseeruvad, ECM areneb tipust aluse suunas.

P säilitamine poliüP-na samasugune nii veget mütseelis kui ECM-s, mütseelis pigem monoP. Erinevus Hartigi võrgu ja mantli poliüP vahel: HV-s rohekem K, vähem Mg. Eriti K

olemasevat taime; samas mitte-ECM juurtes P kuhjus

er naaeroobsetel seentel; teistel mitok geenid rannanud tuuma. Seavad kahtluse alla senise seente polvnemise

askm sad-hulgast, toodangu algus sõltub augusti max temperatuuridest  
saproobide kultuuride säilitamine agaritükkidel steril dest vees

MMN

em EcM seeni kui T-RFLP. Prooviti 3 eri praimeripaari ITS regioonile, sh 58A2, NSI1, NLB4. T-RFLP tekitab kaheldava õigsusega mustreid, mida ei tuvastatud hiljem sekven

lanel paks, Hartigi võrgustik vaid 1-kihiline!!!; väidet ECM. Sek koloniseeris ka kandseene ECM -hartigi võrgustiku rakkude vahel. Sellised struktuurid püsivad suvest talveni

seob rauda ja kaitseb H2O2 vastu, Ultravioletti ja insektsiidide eest, aitab pindadele kinnituda, vs hüperosmootne šokk, vs kõrge temp; . Seentel rakuseinte küljes, apressoori

l on eriseentel väga erineva läbimooduga

taimede ris AM seente tapmine benomüüluga soodustab invasiivse Centaurea sissetungi konkureerides mõne taimega, samas vähendab seda mõne muu taimega konkureerides. E  
Centaurea vohamine Ameerikas (pärist Euroopast) võib olla seotud AM-seentega, mis pole peremehe-spets ning peremehe-spets patogeenide puudumisega Ameerika

y C-st hingati välja; EmH-sse liikus 2.6% taime fix 14CO<sub>2</sub>st. Taimest liikus C palju rohkem kui vastupidi

miombo ökosüsteemide majanduslik tähtsus aafrikas kõrge: mesindus, seened. Palju LK ja demogr probleeme, korrupsioon

ineva struktuuriga

ille CaCO<sub>3</sub> kiiresti haarab

n somaatilise mittesobivuse rühmad, mis koosn isolaatidest. Seal eri isolaatidel eri AFLP muster, v sarn muster ja grupp võib tulla kaugelt alalt

ikust mulla: Suillus viljakehi tohutult-arv saab kohalikust mullast lisa C-ühendeid, vähendab oluliselt mulla normaalset C-sisaldust

MMN



eritud juuretippude arv proovis

lonis eri liikidel ja sama liigi isolaatidel erinev. Tehti suurt vahet ka männi ja eukalüpti eri liikidel nii kolonis% kui taimekasvu stimul osas. Soovitavad muude puude alt korjatud

**miombo kasutamine:** pms puusöe põletamine, ohud põllustamine, viljapuude saagimine. Põletama peaks kohe peale vihmaperioodi, mitte kuivvaper lõpus

**maasiseste viljakehadega seened:** Austraalias leiti korraga üle 150 uue liigi; provialade uurimine inимtundides

kumuleeru üldse. Seentes palju Se

etada. Kui soojeneb, kasvab seente ja juurte biomass vaid igikeltsa aladel, mitte kanarbiku-maadel. Liivakottidesse kasvas enamasti EcM mütseel isotoopide järgi. Mütseeli pro

insport rakust rakk: ylevaade

suhtes, üldjuhul raiudes diversiteet ja biomass vähenevad

pikkus: fluorestsentsvärvid

**Friesi sööde:** palju vitamiine  
asvukiirusega

linna kulukotte juured ei koloniseerinud.

ub C allokatsiooniga mükoriisadesse -< taimed pole C-limiteeritud; arv. Et taimed saadavad lisa-C seentele, et see vahetada N, P vastu

suda ja regul taimekooslust; kliimamuutuste mõju on raskesti ennustatav, ent arv kasvab rohke mütseeli tootjate hulk;

somorfid kasvavad 2°C juures 0,4 mm/p; erinev eri kuusekloonide seas

d; korduvate üleujutustega männi juured adapteeruvad; seente hüdrofoobsed risomorfid koguvad ohumulle; ja jäävad ellu isegi 13 cm allpool veetaset. Üksikhiüfid surevad, ent

Hagem M MN

5i ühtlaselt

ni, vähendas liigirikkust

ine osa

MMN eri dextroosi sisaldusega

MMN

Sphaerosporella, Laccaria, Pisolithus mood eCM pigem toitainetevaeses tingimuses, Wilcoxinale pole vahet (kolonis 95-99%); turbal sama hästi kui turba vermikuliidi segul v :  
MMN

olireostusjäätmel taasmetsastamine männiga: inokuleeritud seente asendumine kohalikega kiire; ECM moondunud, eriti norkadel konkurentidel erinev, Frankia-taimedel väga erinev, enne välja istutamist puudub

MMN

namusel puudel nii steriilses kui mittesteriilses (viletsam) kk-s 2.5 g/l Glc juures. Paks mantel Pinus ponderosa, Larix laricina; rakusisest kolonis polnud. Viitab tugevale tsellulosele  
innasele lisatud turvast

› VK prod ühele ajale

metsas ja selektiivraie aladel kase ja vahtra

ntarellusel; olulised vitamiinide ja aminoh allikad. Hädapärane toit näljaajal

. Samas Casuarina seenmantel oli hästi välja arenenud, kuigi õhuke.

udel.

sist ja 80 rRNA transkriptidest 7 p vanuses ECMs. Kasv 0 -7 p lineaarne

potti *Azelia africanaga* on kogu ECM kolonis suurem

i kui *Scleroderma*. *Scleroderma* kolonis on madalam kui *Tomentella* oma koos inokuleerides

Eukalüpti istanduste MR seend Hisp: *Hydnangium carneum*, *Hymenogaster*, *Labyrinthomyces*, *Lacc fraterna*, *Pisoi albus*, *Ruhlandiella berlinensis*, *Setchelliogaster*

eneb N saastudes taime N konts tõuseb, P sisaldus väheneb, kasv samuti väheneb, ECM morfootüüpide arv väheneb

PAH ja klorineeritud ühendite biodegr vama (enamasti tugevam kui ECM sentel; taluvus palju suurem) ja ECM seente poolt (sümbioosis männiga); puhaskultuurid

1 temperatuuridel

, Algul levivad hüüfilehvikud, hiljem isehõrenemine, risomorfid jämenevad. Variselaikude lisamine suurendas tugevasti mütseeli hulka ning selle fraktaalgeomeetrilisi näitajaid

vermikuliit+puutiigid

vedelkultuur

terite osakaal suurem väetamata heinamaadel. Efekt ka seeneliikidele: vs väetis; muld vs lehekõdu. BD mullas ei muutu, ent kõdus väetamisega väheneb; liigirikkus väheneb mõ

Cenoc => 3 tugevalt toetatud liiki, millel arv eri füsiol omadused; eri liigid samast proovist

maksasammalde kasvatamine ja regeneratsioon steriilses vees ja liivas

Iluses-tõrjumisreaktsioon

sealt juhuslik valik (tagab suure n plotis); %

EcM sõltuvus Acacia holosericea on väga erinevad. Vaid koguN mõjutab EcM kolonis ja sedagi ü vähe. Suurem EcM kolonis stimuleerib noodulite tek  
metsamajanduse mõju: põletamine vs lageraie vs valikraie

ket seentel

taimede, loomade liikuvus, kohanemisvõime on suurem, BD väiksem suurematel laiuskraadidel, sest Milankovitschi tsükkel mõjutab rohkem

osi lagundavatest ensüümidest ja oksidoreduktaasidest

Hagem: valem

Fomitopsis rosea ja Phlebia centrifuga -vanade kuusikute liigid: eoste langemine ja idanevus palju arvukam Põhja-rootsis kus vanu metsi palju. Monokaarüoniga asu

n hypot jr, spetsialistidel kiirem evolüüsi; arv spets ja palju VK tootvad seened on parasiidid???

i bakterite hulk väheneb 100..500x; seentel 30..70x, algloomadel 500..1000 korda

le inokuleerimist

h, et üksikud popid rajatakse ikkagi sex levistega

sport labi EcM seene võib muuta tublisti d15N; Arv erikoidse MR seemed transpordivad taime madala 15N sisaldusega N kui neid kasvatatakse NO3 või GLU  
;une katse looduses interpret 15N mustrit seoses konkreetse yhendi N-toitumisega ei ole moeldav

1 proovist random 1 m juuri

**kasv toitainetega** turbal sama kiire kui paljal turbal, ent palju aeglasem kui agaril. Sümbioosis mütseeli kasv 2...5 korda kiirem

e on mitte-usaldusväärne; rikastumine mööda mullaprofiili, kuna põhja kuhjub 7uhutakse rikastunud org-aine

ie; pop jaotus alapop-deks vs mitte

1) kui kontrollil ja VK tek rohkem



i seente biomassi osakaal väheneb 2x, algloomadel rohkem; aktinomütsetidel tõuseb 3x; bakteritel +-sama, sügavamal suureneb varieeruvus

te muld inhibeerib vrd steriilse mullaga

tega

:sifitseerimisel. Raskemet mõj ka seenekolooniade kuju ja strateegiat. Arv EcM seente kasutamine koos taimedega on v paljutõutav bioremediatsioon

**invasiivsed euk**alüptid RSAs: mitmed liigid levivad vaikselt koldest eemale ja transformeerivad maastikku. Kasutatud ornamentaalselt, varju  
substraadi toitaineterikkusest; alati ilma mantlita; polüspoorne inokul tekitab vaid VK-algmeid

line paks hüüf tühjeneb, umbritsevad peenemad hüüfid väga paksu seinaga ja kaetud glükoproteiididega. Ümbr. hüüfides väga palju mitokondreid ja P-vakuole, tsentraalhüüf ei

; pH, lahustN, vahtral ka K, Fe, %orgaanika, lahustP

omassi tootlikkuse ja hingamisega CO<sub>2</sub> konts tõusule. Efekt erineb tüveti eri liikidest  
selt C/N vahe suurenemisele hingamisega, eksudats, biomassiga, C-tarbimise efektiivsusega, N omastamisega. Erandiks *Amanita muscaria*, *Piloderma* spp

mükoriisas, mükorisofääris ja bulk mullas. Mükoriisas ja mükorisofääris rohkem 16S rDNA tüüpe (5 vs 2), parem P lahustamine, rohkem siderofoore, vähem HCN antibiootik  
st

MMN, eri tardained, puusüsi

ia.

juhulk vähenes kui mükoriissed juured lõigati läbi:

ja sama edukalt looduses nii mono-kui dikaartionitena, mõlemaid sõltuvalt paigast võivad domineerida; invasiivsusel ja kasvukiirusel pole vahet; aastaga võib kasvada juured >8  
idel vrd metsamulla ja kontrolliga

nalt

atanthera olid nagu muud taimed; Ophrys omas vahepealseid vaartusi; Mitmed orhideed said palju N seene kaudu, teised mitte; Cephalanthera, listera ja arv ka Epipactis saavad

occum, Suillus, Rhizopogon ei lagunda sedagi. Fluoreeni ja püreeeni ei lagunda ükski. ECM männi juuresolek aeglustab fluoreeni degradats arv Gadgili efekti, mitte niiskuse väl

MMN

MMN, filterpaber

entega, AM ja Hymenoschyphus paiguti tungisid läbi tanniniseerunud rakkestade, ent mingeid sümbiootilisi struktuure ei tekkinud. Taimed väga tugevas stressis ja paljud suri

ogias; somaatiline sobivus

rmifera: mitteperfor parentesoom

tselluloos. Kogu seene ja kitini 13C muster sama

isi. Paljudel seentel suure liigisisene varieeruvus

Crone suhkru

ccaria, Amanita, Leccinum, Lact, Thel, Cenoc, Gyrodon, Haaval. Lact pubescens, kase-spets Leccinum spp mood EcM koos rakusisese kolonisatsiooniga. Alpova ja Rhizopogon  
imisega. Väike, ebaselge mõju ka peremeestaimel

morfotüübiti, alla 5 jäeti välja

MMN: retsept

Hygrocybe eelistab kasvada samblaga.

orf, biom, RFLP, 3 eri sekventsi

polimorfism (Nei indeks), tüüp1-l madalam. Samad RFLP-probed ei andnud tulemusi teistel Phialocephala liikidel  
amal juurefragmendil. Arv et toimub mikroliigi sisene rekomb, aga liigivah mitte. ITS oli vahetegemisel vilets, muud regioonid andsid ühesuguse hea tulemuse

mõl kasvukohast

SH: matsutake

ljakehad näitavad hästi mütseeli asukohta; peale viljakehade kadumist ühe aasta jooksul on kadunud ka mütseel; seal kus viljakehi pole, pole ka mütseeli

Paariline enamasti koniid ja väga lähedalt

ECMs

nitte valkudega (BSA, zelaatin). Kokkupandud dikaarionitel samade ainete omastatavus vahepealne. Kooseksisteerival metsikutel dikaarionidel samuti paiguti üsna erinev N

viide spets RM söötmele, mis sobib kottseentele ja stimul paksu mantli teket

ritud

ja Calamagrostis -minimaalne, v üksikud Wilcoxina ja DSE; ebatsuuga, leesikas, kask ja paju suurimad

hade lagunemisel eralduv  $\text{NH}_4$  on vaevalt (-36--40 promilli) 15N osas; Kui viljakeha kaotab lagunedes 2% N, siis d15N langeb 1promilli võrra; seente kiire säilitamine omab suurt mõju  
M taimel suurem ja

vs metallinõude tuvastamine  
Pachlewski, Ingestad pine

ippude arv

igal mullal erinevad seened, mullal kus kaski polnud, ecM kolonisatsioon madalaim

kõigi seente ja alamrühmade BD maailmas, Inglismaal ja troopikas. Ekstrapoleerimine taim:seen, putuk:seen, peremehe-spetsiifika, uued liigid ekspeditsioonidelt jm

ata sellest kumba taime on N väetatud. NO<sub>3</sub> ja NH<sub>4</sub> efekt sama

t, signalisatsioon: ylevaade

põllumaa rekultiveerimine: külvati 4 vs 15 taimeliiki: mikroobide BD idiosinkraatiline, erinev 5 riigis, erinev 3 a jooksul, erinev töötlustes, ent kõikjal +-efektid. Arv

IHB kadus risosfäärist 4 a jooksul pea täielikult, Laccaria vähenes kõvasti. Bioloogiplaadid näitasid erinevust mulla ja risosfääri ning eri töötluste vahel: diskriminantanalüüs

tuurist. Liivas 4x vähem ergosterooli kui looduslikus mullas ja väetamise efekt ergost-le vastupidine

ja reassimil, mis muudab täpse D15N interpret keerukaks



uleb alati kaasa votta tykike substraati.

eglasema kasvuga; eoste ristumine palju harvem kui võiks homotalse liigi puhul eeldada; arv lisaks muud mehhanismid

#### Seisellide väikesaarte floora ja fauna võrdlus ning kaitseväärtus

1 (pms 2-lisaelektroniga), mis puhverdavad pHd rakus ja tekivad raku liigeses aluselistudes. H(2)PO4 puhverdab pHd nii mullas kui rakus. Erinevad soolad puhvritena erinevad, Russula ja Cortinariuse erealdamine viljakehast -> agarsöötlele -> mittereostunud tükid vedelasse MMNi, kus 3 kuu jooksul hakkab cälja kasvama. Parim kasv ilma C-ta või teisele, eriti meeldib Rhizoctonia

ktiivsus on erinev, annavad taimetele ja saavad ise erineva isotoobiväärtuse

raalainete kattesaamisega mullalahusest; Arv, et EcM seemned suudavad oluliselt parandada taime veemajandust läbi selle, et annavad mineraalaineid

EcM seentel kuni 12% kogu-C-st ja 50% valkude C-st pärineb mullast

des u 4promilli kõrgem. Seletavad seda suurema kasuga EcM seentelt

arv et ECM ja AM seentel on 15N frakts sarnasel printsiibil;  
-d mõj arv lipiidide muster;

lavulina saprotroofid 14C põhjal. Sowerbyella puhul pseudoreps

ga

cui prot. EcM seemned arv transpordivad 15N-vaaseid aminohappeid taimedesse, ise rikastudes 15N-ga;

Koguprimaarprodukttsioonist läheb taimedel maa-alla 27-68%, seentesse 1-21%. Allokatsioon EcM seentesse sõltub v tugevasti allok maa alla. Vä

indide kasv kiirem ja EcM kolonis väiksem lõunapoolsetel liikidel ja pop-del.

sed. Mida vanemad, seda rohkem hiiife.

põhk, 14C-ligniini (DHP)

as; seente viljakehadesse augustis EcM mood 39% mikroobsest biomassist mullas; seente viljakehadesse jõuab C 3-4 p pärast 13C rikastamist,

lisemad kui AM seened P omastamisel

parinev mittelagun N yhendid; seentest taimedesse laheb pigem 14N. Arv vaetatud metsades N kyllastus põhj juurte suuremat 15N kui mullas; mykoriisad on 1.7-2 promilli 15N  
hade biomass väheneb drastiliselt puude koorimisega.

a osad Caesalpinoideae on ECM Tansaania

alpinaceae, ülevaade.  
lamiseks. Frankia ei tee vahet

nullas d15N rohkem kui pinnal arv varise tottu ja kitiini tottu; vananedes ja madanedes NH4 lendub, põhjustades 15N sisalduse kasvu; isotoopide jargi ei tohi vaita, et eri taimed

Hagem + turvas + perliit

uuretippe

, *Lactarius deliciosus*). T flavovirens arv liikide kompleks, sest seal leiti väikeses skaalas 3 tugevalt toetatud klaadi, kus ITS erinevus rühmade vahel 4-7 ja rühmade sees <2.5%

elab ka edasi

amoodi

MMN, eri pH tõstetud h<sub>2</sub>so<sub>4</sub> ja naoh-ga

pigmentide tottu

icella NM toodab

õra kõrgem kui temp - N tsüklil troopikas avatum; Arv. et top-predaatorite 13C annab märku maa-aluste ja maapealsete ökol suhete tugevusest;

Tuber spp; parim isoleerimiseks woody plant medium

hüübil ja oluline roll ka seene viljakeha-indiviidil

toimi. Pettus võib olla, et osad taimed panustavad üh süsteemi vähem, anastomoseeruvad hüüfid võimaldavad efektiivsemalt toitaineid transada ja stimul signalisatsiooni

d eristada 10/12 monokariootsest eri VK saadud kultuuridest. Samad markerid sobivad ka teistele Hebeloma liikidele, ent mitte nii hästi

d PAH biodegr on risisosfääris kiirem kui bulk mullas, ent MR hüüfide olemasolu inhibeerib lagunemist, arv MR seened võtavad ära lagundajatele vajalikud mineraalai

mutualismi kontinuum: sõltuvus genotüüpidest, keskkonnast, konkurentsist, ajafaktorist ; arv MR moodustudes taimsed toitainete omastamise protsessid asenduvad seene omade

m 4 tüübist: RFLP

ja mis Trudell, 2003). Albiinod on taiesti seentest soltuvad ja roh miksotroofid saavad 48,7 protsenti Cst seentelt; arv albiinode vahene fitness esialgu takistab nende laia levikut

ens protsessidele

oksiidi dismutaas, väga vähe olulisi muutusi puhaskultuuris vs 48h infektsioonistaadiumis seene vahel

Pinus contorta semneperekondadele erinev nii taimede biomassi kui EcM kolonis osas

t ITS1 ja IGS2 samad; 95% juhtudest ITS1 ja ITS2 versioonid samad -mingil tasemel krossing-over toimub. Fülogeneesis ITS1 ja ITS2 inkongruentsed

-alfa ning beta-tubuliini mõlemad alleelid olemas

juurte vähenemine õhu saastatusega

ned potikatses vähendavad eukalüpti efekti teistele taimedele

hkuses enam ergost. Põhjal

oomides: jumps), ent muu sama: mch, ITS1, ITS2

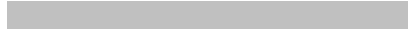

; autolüüsi faasis toimub glükoneogenees, mis kompens 13C väärtusi,

imesena jaole ressurssidele, EcM seente evol saproobidest ei toimunud kindlasti pika hüppega

a, Tylophiluse, Leccinum, Scleroderma, Pisolithuse kultuuri pindala; Suillus, Lactarius, Cenococcum ei muutu; pineenidkõik inhibeeritud (vähem Suillus, Lactarius affinis; okkal  
tantidel; vähem esineb positiivset koeksistentsi ??? Tanniini ja N lisamine muudab mitmeid neid interaktsioone. Positiivsed on kahtlased, sest võivad tuleneda seente genotüüpide ülekandmisel.  
.65 a männi istandikus kas eri proovivõtustrateegiaid: mulla T-RFLP vs 1 vs 2 vs 3 juuretippu proovist. 25% liikidest ei leitud mulla DNAd analüüsidest ja 25% jäi leidmata 2 vi

eis kui ka repellendid

b suurlinna viljakohade arv ja biomass, ECM %koloniseeritud väheneb suurlinna läheduses, korreleerub okkakahjustustega

AM kolonis, suurendab ECM kolonis

MMN

P, (AI)

taadiga. Vitaalus suurim aprillist juunini ning novembris (GER); päris pinnalähedal ja B-horisondis, vahepealsetes madalam



ju. AM taimedel ja EcM VK-del mõju polnud v nõrgalt pos.

vähendas pealsete juurdekasvu järgneval aastal, käbide teket, ECM seente viljakehade prod, tuberk ECM osakaalu (mitte oluliselt), samaks jäi ECM kolonisats, juurte kasv, er

**Eesti taimkatte** elemendid: haruldaste taimede levik (pms Lää-Saaremaa, Hiiumaa), levilapiirid jm haruldust põhjustavad faktorid

e var 0-3%; AG1 jaguneb 3 peremehe-spets alarühmaks, kus rühma sees ITS >99% sarn; AG4 jaguneb 2 peremehe-spets alarühmaks; Agde vaheline hmoologia <96%; AG4-s

haploidseid eoseid et säilitada potentsiaali

urekarvad ei tähenda alati ECM puudumist; arv aastevah vahel kolonis% sõltub ilma kuivusest; ektendoMR puhul MR teke algab Hartigi võrgustikust, ka pikkjuurteil on rakud ja jooksul kaotavad ECM mood võime; kasv eri C ja N allikatel; kasvab hästi steriliseerimata metsamullal ja autokl turbal; vitamiinidest vajab vaid tiamiini nagu teised lehkiseed

kuuse geneetiline muundamine ei mõju mullaseente kooslusesle. Mineraalmulla BD suurem kui org.

ristamisel saadud dikaarionid erinevad tüksteisest tugevasti taime transpiratsiooni reguleerijatena, õhulõhede juhtivuse muutjatena ning abina põuast taastumisel. 9 10st olid par ristamisel saadud dikaarionid erinevad tüksteisest tugevasti taime hüdraulilise juhtivuse ja risosfääri veepotentsiaali reguleerijatena ning abina põuast taastumisel. 10 10st olid p nni MMNI kui kasvutaskus; kombineeritud dikaarionitel väga suured varieeruvused, 1/3 ei moodustanud yldse risomorfe, teistel väga erinev läbimoot. Vanadel risomorfidel tsei

> proove, sarnane, vale interpretatsioon

3E intens = quant PCR = DGGE kloonide arv (mitte alati!)

**Populus tremula** EcM sünteesiks ainuke sobiv MMN + vitamiinid

1MEL suurem kõrge CO2 korral, varieerus tugevasti aastaajati; %kolonis sama

itmeid eritüüpe

maaiseste viljak

hadega seente mitmekesisust enamuses Eur maades v vähe uuritud, mistõttu on ka puudulik kaitsekorraldus. Lihtsalt pole teada harulduse põhjuse  
on transkriptomika väga erinev kase juurega kokku viies mittemükoriisest tüvest võrreldes kolmanda tüvega, kusjuures pole teada kas teine tüvi on non-ECM või ei sobi kase  
lik ülevaade

dide omadused ei pruugi olla aditiivsed. Mõjutab sümbiontide -tolmeldajate divergeerumine

MEA

as. Põuakartlikumad hoopis haruldased liigid ning ka liigid, mis lihtsates kooslustes toler, keerukas aga mitte. Idiosünkronised Arv liigirikkus-ökosüüsi suhe on teravam maape

ib

atu alates 8 m. Eri liikidele erinev. Biomassi/esinemissageduse erinev jaot eri liikidel

EcM seente viljakuse diversiteet kahaneb N saastudes. Eriti tundlikud Cortinarius, Lactarius, Russula, Hebeloma, Tricholoma. N taluvad Lact theiogalus, Laccaria  
ECM seente 13C korreleerub seente N-ühendite kasutusega. Mida mineraal-N rikkamal pinnasel kasvab seen, seda jõuetum on ta kasutama valke ja aminohappeid puhaskultuur

ja sobilikke töö disaini, keskk andmeid, ja nende põhiseid mudeleid; distaalsed vs proksimaalsed muutujad, ; tuleb tekitada globaalseid andmestikke

; AAT. Sõltub ka GC sisaldusest

mullaga Puerto Ricos. Seente biomass v kõrge

mono või polükultuuris

miombode säästev majandamine Malawis: seentest saadav tulu on päris suur: teine koht kalakauba järel

-mullas pms ECM seente sh Russula oma. Russula lakaase esines igas horisondis

Populus 3 spp: vs CO2 tõus: liigiti erinevad EcM, AM ja juurte prod muutused. EcM hulk suurenes vaid P. Albal (79%), AM 2-38%, jp 35-84. Suurenes juurte allo

∅ ebatsuguga, teised mitte. Vahevormid. Eelnev uurimus männiga sai samadel seenetivedel erinevaid tulemusi

tlus; orgaanika lisamine suurendab

us võiksid muudustuda T-T dimeerid. Arv põhjus suurenev UV kiirgus seoses mütseeli maa seest maapinnale tulekuga, läbikuivamine ja vetikast põhj oksidatiivne stress. PILD

midas suurem BD, seda raskem invasiivsel raiheinal (*Lolium multiflorum*) kanda kinnitada, samas kui biomass ei avalda mingit vastunõju

võivad üle kanduda ka võrdlemisi eraldatud kaugetele tüvedel. Muud kromosoomid ei kandu.

orhideedel *Sebacina-Epulothiza* anamorfidel monilinioidsed rakud

Kongo Ituri: prim metsas rohkem >10cm dbh puuliike nii ala kui indiv kohta vrd sekund-metsaga. Sek-metsas eriti vähe Gilbertiodendroni ja Julbernardiat, mis domi

meerikas ECM-taimed

. Kõik ECM-evol etapid on looduses nähtavad pealiskaudse mükoriisa läbi AUS taimedel. Kuna esialgu uued sümbiondid peaksid käituma ebaefektiivs  
vaade

3CM kolonis väheneb kui taime lehed ära kitkuda. Seos aastasisene. Eelmise aasta kitkumine ei loe  
massiitiini ja ergosterooli põhjal mullas vs juurtel

1 ja juure eksudaadid, zeatiin muudab hütüfide morfoloogiat

atelliite, mis on sarnaste seente IGSle (Collybia ja Trich matsutake)

MMN

an: efekti polnud; benodanil ja captan inh roosteseeni

ia, seente levikukiirus: Hebeloma 16 cm/a; Inocybe 7,5 cm/a; aeglasem B. Pubescens puhul.

oostega. SLAIDID

biodiversiteet sõltub suurel määral maakasutusest. Arengumaades rajatakse uusi põlde seoses kasvava rahvastiku ja tulevikus vabakaubanduse soodustamisega, kuna

ligninooli ja teadmata seente eluviisi ennustamine >90% tõenäosusega -mitmed liigid on vales rühmas. Arv saproobide EcM-mustrit põhj arv pool-biotroofid mulla fertiilsusega; suurem sõltuvus korreleerus suurema orgN ülesvõetuga;



ist metallistressi puhul. orgaanilised happed metallide kelaatimiseks hüüfiseintele või mitte eritamine vältimaks liikuvaks muutumist. PILDID

**thiamiin**, aminohapped ja B-vitamiinid ja Mä-juured stimuleerivad nii EcM seente kui saproobide kasvu  
mist on T. Uncinatum heterogeenne, ITS sisene identsus madal, 94%

alduseks eri MR gruppide eristamiseks; Arv et kadakas on EcM sygavamal mullas kuna 15N muster sarnas EcM taimedele; N konts EcM>AM=ErM

a palju niiskust

t. Viljumisaja pikkus sõltub konkreetsetest mullatemperatuuridest ja selle kestusest. Viljumine Carya, Tilia ja Ulmus americana tüvedele lähemal kui juhusel, ent Quercus spp, C

nükoriisa teke aeglasem. Juuretippe rohk, ent kolonis madalam.

**Hagem**

ettekasvatamiseks

radeni palju rohkem vrd maapealsete viljakehadega seentega; Maasisestel seentel eoseid rohkem ka sügavamal, 3-6 cm mullakihis, samas kui maapealsetel enamasti varisel. Ce

invasiivsed liigid: kasu ja kahju levikul mutualistidest, konkurentidest, vaenlastest, abioot kk sobivusest ja nende interaktsioonidest. Lähedas

eri söötmete võrdlus, lisandite võimalused

seente kaitse: tähtsaim säästlik ja kõiki pooli arvestav metsamajandus. Palju peab põhinema teadusuuringutel. Väga oluline mõista seente autökoloogiat

vaheline >6%

MMN pH 7

il: palju kiirem, täpsem

-s tunduvalt väikemad konts.). Uurea osatähtsus EMH-s v suur

okastes NaCl puhul

Arv. Et *Tuber indicum* koloniseerib Euroopat pms läbi saastatud istikute

▷ seksuaalsete eoste levimisega. Samas uued genetiid on vanadest geneetiliselt üsna erinevad. Arv, et matsutake levikul on eostel väga suur roll

MMN

taimede ja selgroogsete loomade BD tulipunktid. Endeemsete liikide arv, suhe pindalasse, ohukategooriad; sh Madag ja Uus-Kaledoonia  
1, mykoriisatüüp (arv osad mykoriisatüübid votavad pigem orgaanilist N otse varisest)

imekooslustes

4\*3; kolonis suurem puudele lähemal kui kaugemal  
e EcM kolonis. Taimekasv palju parem vrd mittemükoriisse süsteemiga

1 >50, et usaldusl. Hinnata

EcM tõestati 10 perek: Anthonotha, Aphanocalyx, Berlinia, Didelotia, Gilbertiodendron, Julbernardia, Microberlinia, Monopetalanthus, Tetraberlinia, Afzelia. EcM puude arv ei

Morizet ns

toitainete gradiendil kui toiyu on vähem (mõõtmistehnika kahtlane, saproobide lahutamine peale proovide pikka seismist!!!); EMH produktioon suurim keskel, kus lühikesed r

**taimekasv** eri lehekõdu tüüpidel mitteadiitivne, idiosünkraatiline; taimelehtede algupära ja segatud olek mitmel tasandil avaldab lagundamisele idiosünkraatilist efekti (efekti po

uuringuteks, kuna s o stabiilsem

poollest, suutes lagundada tselluloosi ja õlgesid, võimelised kasvama laktoosil, Mõned EcM seened suutsid lagundada tsellobioosi ja lihheniini ainult si

**Frankia:** isoleerimine puhaskultuuri

vastavus seks vajalikkuse hüpoteesidele: Mülleri ratchet, Kondrashov hatchet, Red queen. Vanade aseks org pikk nimekiri: bdelloidid, AM-seened, Ophiostomataceae jt

varieeruv

**Boletus sp** viljumine saepurul + kaerateradel, puhaskultuuride kasv erisöötmetel  
rukise ekstrakt + Ohta sööde: Lyophyllum shimeji võime produtseerida viljakehi ilma taim sümbiondita  
rukise ekstrakt + Ohta sööde: Hebeloma spp võime produtseerida viljakehi ilma taim sümbiondita

ort, sink, source, EMH kasv: ülevaade

**Uus-Meremaa EcM** taimed: Leptospermum, Kunzea, Nothofagus. Seente perek nimekirjad nii kohalike puude kui sissetoodute all. Amanita muscaria kolonis ka nati

kuusel on eri aladel erinev, sõltub seeneliigist. Mantel 16.5 -29 (max 70) ym, korteks 84 -104 ym, steel 123 -166 ym. Rikkalikemal mullatüüpidel oli suurem korteksi, steeli, kc

eri kaugusele puudest: kaugus mõjutab %kol ja liigirikkust

**Wilcoxina** pH opt 6.5-7

põhjal

cM vs AM mustrid võivad olla toitainete-rikkas keskkonnas teistsugused ja neid tuleb teisiti interpreteerida; arv. sademed suurendavad mikroobset akt

ivamis-ja reostumisoht seega suurem. Sphaerosporella hyaliinne ECM alatine kontaminant

i hästi. Valikuline tuumade kandmine eostesse ei näi paikapidavat

ssum; 2. Hebeloma+Naucoria+Hymenogaster pp; 3. Descolea, Descomyces, Setchelliogaster. Maasisesed vormid on tekkinud ja iseseisvalt ka radiceerunud palju kordi kõigis kl

MMN

vaja...



aksonite kaupa

stumisbarjääri; kandseente konidiogenees -palju näiteid; seente levimine üle maailma inimese abil. Tuleks ikkagi kus vähegi võimalik kasutada morfoloogilist liigikonts, sest s o

is-ga. Mida suurem on AM kolonis, seda väiksem on risosf erinevus bulk soilist. MR tüüp on üks olulisemaid taime f-naalseid tunnuseid

v et puude genotüübid ja mulla-heterogeensus tagab mikro-koevolutiooni

ele

metsade säästlik majandamine *Morchella* spp. Korjamist silmas pidades. Pole otsest retsepti, kuna eri liigid on eri öko strateegiatega.

oletanud ensüümid, mis lubavad taimede rakuseina lagundada;

MMN

ädasti leida õige baasväärtus -pikaealiste I taseme tarbijate ; mitut isotoopi võib samas segamudelil kasutada kui C/N on sama (kui eeldatakse, et C ja N omastamine on samas

keystone-liikide uuem kontsept ja diskussioonid

**BIOLOG:** ülevaade, probleemid: inokulumi tihedus, lahjendusefekt, representatiivsus

invasiivsus: mükoriisa roll taimede invasiivsuses - invasiivsed taimed pms NM või väikese kasvuefektiga. Paljud suruvad kohalikku mükoriani

ltuvus liikidest

1

orporatsioon DNAsse, raskusgradientfuugimine, spetsliikide määramine bakteritel, hilisem funktsionaalgeenide otsing

PO sooe Cortinariuste kultuuri eraldamiseks ja kasvatamiseks. Kas sama soodet ka Lactarius deliciosuse veget myc kasvatamiseks vedelkultuuris

i vahel

st. EcM seentel puudub tsellulaasne ja ligninolüütiline aktiivsus, mistõttu arv. Et õige EcM seene ei saa saproobina olla. Arv et EcM seente tihedus hüüfimas on tingitud konkuren

Nothofagus Austraalias: ülevaade

BASM (väga rikas sööde)

Acacia Austraaliast introdutseeritud ja eriti kui veel nakatatud Pisolithus albusega, mõjutab mikroobikooslusi ja -aktiivsust, mulla toitaineid

Oidiodendron maius: toodab turbapallidel ja kultuuris Cladonia talluse juures mittester gümnoteetsiume, mis sarn teleomorfse perek Myxotrichium omadele. Viitab O maiusele

taimede invasiivsus ja invasiooni seosed mutualistidega: Ficus-liblikas parimini uuritud; introduts. Liikidel võib spetsiifilisus muutuda; AM 1  
invas sõnastiku definits: invasiivne - kui levib ise >100 m eemale v >6m 3 a jooksul; naturalization, aliens, transformers, weeds  
invasiivsed paljasseemnetaimed - pea eranditult Pinaceae ja Araucariaceae-Podocarpaceae; teistest paistavad andmete põhjal olulisel kohal E  
invasiivsed liigid RSAs: Pinus spp, Acacia spp, Populus spp jpt  
sissetoodud metsanduseliikide omadused: parem puit, kiirem kasv, lihtsam majandamine, seemnete/seemikute saadavus, suurem resistentsus

MMN

MMN

x

ini kui inokul mannimetsamulda vs puhaskult vs kontroll. Mitme puhaskult korraga inokul mood rohkem ECM kui monokult

ant neil pole PODe; Eri pr-mä seentel palju koopiaid reducing polyketide synthase geeni, mida va-mä seentel ainus koopia. Muudelt genoomiomadustel

eksootiliste patogeenide seente introduksioon: näidisliigid, nende päritolu, kahju jms. Nii munasseened, kottseened kui roosteseened. Tingimused epideemiaks

mükorisosfääri organismide roll bioremediatsioonis, võimalused, GMOd, taimede juurde toomine

na sericeum trentsides sees.

asti mõjub %kolonis, vähem EMH-le.  
üpidest  
itte [arv teine liik]

a  
eks

multikar paarikaupa tuumasid; eoste monosp isolaadid on multikar, kui isolaadid kohtuvad, tekib multituumne paarikaupa tuumadega mütseel

on pop gen-str v sarnane

üle viljakehade baasil. Kuna viljakehas olevad eosed ei ole heterosügootsed, samas eri viljakehad on, arv. tegu ise viljastamisega (nagu T melanosporum)

lati üks MAT-tüüp, eosed pooleks; eostega inokuleeritud taimedel tuvastatakse pms vaid üht MAT-tüüpi trühvleid, ilmselt teist (isast) on v vähe nii et c

Björkman

abstraadist. Arv. Seentest tulevad rasvhapped sünteesitakse ümber

neemist samas mullas VK sisalduse baasil; saprotroofid, Hydnum, Xerocomus, Lactarius F ja O horisondis, Sarcodon ja Russula cyanoxantha A ja B horisondis

olonisatsioon podokarpuselist juuremügarates

mittekultiveeritavate bakterite kultiveerimine: söötmes lihtsuhkru asemel ksülaan, lisaks palju vitamiine, seleniit, org-happed. Pms uued alfa proteobakterid ja atsidobakterid

entsiaal. Suiloidid kasvavad ka suht kuivas, opt temp koigile 23 kraadi, 30 juures oluline kasvu pidurdus

ECM seened kasvavad reeglina palju paremini  $\text{NH}_4^+$ -glutamiin>glutatioon= $\text{NH}_4^+$ = $\text{NO}_3^-$  söötmel. N-ühendite kasutamine polnud seotud kasvukoha N ühenditega. Membraanil ve

Geotrophium, munasseened, parasituaalsus

puhverdatud vs mittepuhverdatud sööde

15N põhjal väidavad, et eukalüptid on ECM seentest vihmametsa mullal ja inorg N olemaolul vähem sõltuvad kui muidu  
a) mulla  $\text{NH}_4^+$  ja aminoh 15N oli sama mis kogumullal, aga  $\text{NO}_3^-$  15N oli v kõrge. Poleng suurendas  $\text{NH}_4^+$  hulka 90x,  $\text{NO}_3^-$  60x ja aminoh 5 korda, ujutamine suurendas aminoh  
b)  $\text{NH}_4^+$  domineeriv ühend mullas kui häiring oli vähene. Proteaceae võtsid üles ka glütsiini ja seega arvatakse, et proteoidne juurestik omab erilist funktsiooni  
c) N turnoverist ja mulla kõrge 15Nst 2) kõrge 15N ja selle madala diskrimineerimise tõttu; 3) madala seente osatähtsuse tõttu taimede N-toitumises. A

1 Taimedel

rcoding ait EcM ja AM seente introduts: ülevalde ja ohud: seend ei pruugi soodust peremehe kasvu, võivad stimul invas taimede invasiivsust, er männid a eukal. Sama liigi uue

invasiivsel Hypericumil P-Ams sissetoodud populatsioonidel väiksem sõltuvus sümbiontidest kui euroopa populatsioonidel. Katse vaid Glon

tes palju väiksemaid: rajaja efekt -1m kasvukiirus a-1

PDA, HA



si

**Pisonia grandis** mükobiondi kasv eri N allikaga söötmetel: org N parem kui anorg N; PDA on hea sööde

enteron: arabitool ja sahharoos kasvasid ja mannitool, glukoos, tärklis langesid pouaga; L subdulcis-mannitool, glc, fru, sahharoos kasvasid pouaga,

**Gel-Gro** meedium AM-ja endofüütide lihtsaks isoleerimiseks juurtest. Võib kasutada ka antibiootikumidega

ilist valguse efekti; seemikud võivad kasu saada suurte puude hüdr vee tõstmisest; Arv. MN on neg feedback, mis võimaldab eriliikidel stabiilselt koe

mutatsioonid, mis üle geenide juhul jaotunud. Eriti domin A>G transitsioon. ILMSELT kloneerimisvead

**MMN, PDA...**

viljakehi leiti. Fabales ja Salix humboldtiana olid mittemükoriissed nendes kooslustes. Arv et need EcM seeneperek liigid on saproobid. Arv seened adapteerunud üleujutustega

ssagedus

ne kuni 100% ultuses G intraradices puhul, teistel eri kombinatsioonides ef väiksem. Ka Paris-tüübi puhul ilma arbuskuliteta toimus vähene P-ülekanne, s.t. fosfaadi transporter

elt suuresti: suurim sügisel ja kevadel, väiksem talvel ja suvel. Kõigis horisontides ühtmoodi, ent sügavamal erinevused väiksemad. Kokku mineraalmullas väh sama suur aktiiv  
Kagu-Aasia biodiversiteet eri geoloogilistel mikrokontinentidel, hetkeseis, kaitse ja tume tulevik

14C järgi. 14C liigub lehest hüüfi tunni-paariga

transgeensete taimede mõju: pms neutraalne, harvem negat

Sr kui mitteMR; Cs leostub aeglaselt, seemned toovad pidevalt põhjast üles. Eriti palju kõduhorisondis, seente viljakehades sõltub mütseeli asukohast mullas

haruldased torikulised: probleemid leviku ja elupaikade fragmenteerumise ning inbriidinguga: ülevaade

on tugev konkurents, vähe toitaineid ja vähe vaba ruumi  
H surevad, ent kuivemates tingimustes ilmuvad taas

invas ristõieline toodab toksine, mis inh teistel taimedel AM teket

puusüsi + tomati juured

eukalüpti ja männi istandikud tekitavad v erineva mikrokliima vrd looduslike metsadega, mis mõj putukaid. Eukalüpti istandused saavad kohalikest metsadest patoge

gasi. Ei ristu vanemliikidega ja omab sugulise paljunemise võimet  
ii Glomus liikidevah var. K mitte-degener praimereid, mis arv on põhj spoorisis arinevusi eelm uuringutes

Hagem + tetratsükliin, 100 mg/l; +-2 ppm benomyl

anspordis

**Caladenia W-AUS**: Sebacinales. Spetsiifilisus per se ei mõj orhidee haruldust; kui seen on haruldane, on ka spetsiifiline orhidee haruldane. K  
; puudel keskm kahj kõrgeim, suure ja vähese kahj korral madalam. Arv optimaalsusteljel; aastaringide järgi ECM kolonis hinnangu andmine (kahtlane)

**EcM seente globaalne** liigirikkus 7000-10000; arv vajab Boletus edulis viljakeha tekkeks 3,5-14M EcM tippu või 363-1800 km EmH;  
fotütüübiti  
, mis arv tuleneb korgest N konts; Varise saproobidel tugev korrel N konts ja D15N vahel; Arv et eri EcM seente 15N vahe tuleneb peremehesse transpordi efektiivsusest ja pai  
nised  
amistemp ei mõj D15N muurit  
**MMN koos** või ilma orgaanilise N-ga  
eemid, andmete sidumine; arv morfotütüübiti

illa, Fusarium, Phytophthora jt. Rekombin tuvastamine, tähtsus eri k-tingimustes, rangelt mitterekombin seeni polegi teada. Fülogeni liigikontsepts langeb kokku morfo- ja, ent pe  
l Neurospora, Schizoph, SacchM, Lentinula. Seega, enamused seenid pole globaalse levikuga, v.a. Aspergillus fumigatus. Arv. Väga konidiaalse levikuga.

ococum, 9 hävimisohus ECM-seened  
ainult lisatud NO<sub>3</sub> või NH<sub>4</sub>  
iseeritud hävimisohus ECM-seened

vähenda ECM-potentsiaali. Näriliste fekaalide lisamine parandab ECM mood (er augustis kogutud vs maikuused fekaalid)

aimede suuruserinevused. Transp toimus ka ilma wwt-aga (0.5 um võrgu korral). Väidet Wul et al. 2001 ei saanudki leida ülekannet kuna katsid taimed

ksul tunduvalt

1

arv kliimamuutuste tõttu sureb aastaks 2050 välja 11-33% liikuvatest ja 34-58% sessilsetest organismidest. CO2 emissioonil põhinev kliimamuutus on olulisem hävi

ogeensusgeene rohkem kui peremeestel resistentsusgeene; suurim patogeensus kui mõlema levik on lai, väiksem kui lokaalne või globaalne

MMN

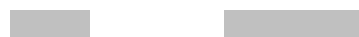

ADOBEga

i mõjuta N fertiils; paljud risomorfid elasid >21 kuu

AM biomass juurtes mulla pindmises 10 cm kihis 4 g/m<sup>2</sup> kõrbes kuni 44 g/m<sup>2</sup> rohumaadel.

tead suured ja C fraktsioneerimine mitmetes kohtades

amise suhtes

ib pajul kiiresti kaugemale liustikuservast

ortinarius sp ja Chroogomphus spp saprotroofi-laadsed mustrid. Chroogomphus arv parasit Suillustel

nud mantlisse ja risomorfi

ainete, kunstsubstraatide mõju

teering annab parema resolutsiooniga tulemuse vrd käsitsi aligneeringuga (arv käsitsi jäetakse kahtlased kohad välja)

SH: matsutake

männikoore ja tweeni lisamine stimuleerib vegetatiivset kasvu

ned (?) aastad valitsesid palünooloogilistes andmetes vaid seeneeosed, ent nende hulk asendus suht kiiresti kõigepealt sõnajala eostega. Seened olid kivististes septadeta ning ei s

Tsili Nothofaguse metsades: invasiivsed liigid *Pinus radiata* istandikest: *Amanita muscaria*, *A. Rubescens*, *Pax involutus*, *Xerocomus rubellus*; kohalikest liikidest d

invasiivsus mikroobidel, mis seotud taimedega v mitte. Mikroobid võivad mõj ka taimede invas.; häiringute vs mittehäiringute taimedeinvasi

s reageeris erinevalt toitainete stressile kui oli nonMR või sümbioosis  
aime, kuigi need oli mineraalinäljas

seente raskemetallisisaldus Lapis

Heterobasidioni tõrje seentega: eriseened kõik vähendavad liigirikust, BD kändudel -kultuuride baasil. Eriti drastiliselt mõjub *Trichoderma harzianum*



hiljem Sebaciales Weiss 2004] isol india kõrbest AM-klamüdospoorigest. Kultuuritunnused: õh kestad, dolipoorid, mitteperfor parentosoomid; klamüdospoorigest; kolonis juurekor

e liigikontseptsioon tihti parafüleetiline DNA fülogeneesi järgi; areng eri mandritel arv hiljutine, peale kontinentide drifti

sfaari mõj inimasustus on viimastel ajal muutnud oluliselt nii N, C, S tsükleid, levivad tehnogeensed ühendid ja raskemetallid. Globaalne soojenemine toimub pms fossiilsete

tsas. Kuusikus sügavusjaotus ühtlasem kui tammikus, üldse kuni 70 cm süg olulisel määral. 13C mütleelis sügavuti sama, aga 15N erinev huumus- ja min-horisondis. Enamus 1.

metall ja muid elemente: PIXE analüüs. Tugev soltuvus ka sellest, mis soelkotis oli (apatiit vs liiv vs tuhk)  
astajati ja liigiti varieeruv; vs mineraalainete rohkus  
ped, soelkotist väljas-soelkotis, 13C eristamaks saprotroofidest

vedelsööde läbivoolukultuuris

pöogi EC1 trambitud pinnasel ergosterooli sisaldus pöogi ECMI väheneb; suurem on paikade erinevus; taimkate on tugevasti häiritud, SOM ja varis vähenevad

uarinaceae, Rhamnaceae, mimosaceae, Fabaceae, Euphorbiaceae, Sterculiaceae, Thymeliaceae, Apiaceae, Rubiaceae, Goodeniaceae, Styliaceae

seened olid seotud kas eukalypti või Melaleuca, Laccaria oli patogeenne.

Endogone, Sclerogone -mitteMR liigid kasvavad hästi, ECM liigid viletsalt -hääbumisoht. Czapeki söötmel (retsepti pole)

taimelehtede algupära ja segatud olek mitmel tasandil avaldab lagundamisele idiosinkraatilist efekti (efekti pole)

mulla C:N suhtest

seente kaitse: eri kooslused. Britannias eriti rohumaad ja pargikooslused; hõrendikud kogu Maailmas v väärtuslikud seente poolest. Enamasti ka muude taksonite po

arius kaob, niisutades tuleb Cortinarius just juurde, põuaga kaob, ent peale põuaaastat on eriti palju

genotüüpide arv stimuleerib kasvu

eksootiliste patogeenide levik troopilistes metsaistandekes. Nende kahjustused kohalikel puudel, kohalike seente adapteerumine eksootiliste puudega ja tagasileviku

mullamikroobid hõlbustavad taimede invasiooni. Paljud invasiivsed taimed muudavad mullamikroobide kooslusi tänu keemiale. Muutused aineringses.

VK enam: Amanita phalloides invad N-Am: VK enamasti leitud teede ääres, ent mõnes kohas ka sigaval metsas. Invadeeritud paikades domineeris VK

ibid. Mingit jälge paraseksuaalsusest pole. Mida värskem on ala, seda vähem on genotüüpe, ühe ala piires suurim genotüübisine kaugus 78m; genotüübid läbisegi, ent vaid üh

annavad N taimetele. EcM seened siiski suudavad ac-Glcamiini omastada veidi

nikus suurem kui luitemännikus kanarbikulaadsete tõttu arv.

M kolonis suurem kui vahep alal > rabas (ca 50%), juurte tihedus metsas=vahealal >> rabas

PDA, MMN

line

1  
MNC glükosita

nõus

PDA

steemides ülesvõtul fraktsioneerimist pole. *Leotia lubrica* muster on nagu EcM-seentel; *Chalciporus*: kõrge 13C nagu saproobidel ja kõrge 15N nagu E

l EcM taimedele ja AM-taimedele kultuuritubides. V sageli mood rakusis kerakesed moniloidsete hüüfidega. EcM ega HN ei olnud

etria on erinev pärnal. Seene koe osakaal 79 vs 37%; seene RNA osakaal 64 vs 35%; ergosterooli konts 1,62 yg/mg vs 0.72 yg/mg

ajul ega ka rakumembraanide osana, seega seda ei saa kasutada seente elusbiomassi näitajana

s väga suur diversiteet dominantsuseta





eri liikide vahel, mis on kasutusse jäetud soodsate omaduste tõttu, ent need on ökol. vähem kohased.







d, orhideedes kultiveeritavaid Sebacinasid polnud, esines vaid Tulasnella

kus 5-15); 15-20 peal +-stabiilne

rite ja saproobide biomass. Arv näitab see siiski kõigi juurega seotud seente biomassi: kott ja kands; ergo ja PLFA kadusid eri horis samaväärselt, kuigi min-mullast 1

sakkal, mulla tihedus langeb. Muutused eriti pindmises 10 cm mullas. 12 a jooksul taimkate nagu loodusl, muld sügavamal siiski mitte

. 500-14000; qPCR ei tuvasta kõdus suuremat koopiate arvu kui mullas; mullas kandseente ITS koopiaid 67G-910G/g biomassi kohta





norfism väga väike: arv vana pudelikael seoses jääajaga



ja P vahel tugev korrel, teised mono-ja divalentsed metallid esinesid vastavalt kontsentr sötmes. PolüP graanuleid rohkem kui sötmes KP<sub>i</sub> vrd MgP<sub>i</sub> v NaP<sub>i</sub>. Ainu

erimisega. Re3konstrueeritud koosluses ei suutnud T-RFLP tuvastada mitmeid haruldasi liike

i ja arv on aluseks kevadisele viljakehade tootmisele

umis tekitab osmootse surve, kaitse UV, kuivamise, ensüm lüüsi, kõrge temp, oksüdantide, toksiliste metallide, arv ka fungitsiidide eest. Patogeenidel allelopaatias, t

ri taimede risosfääris eri pH ning DCA põhjal eri mikroobide kooslused

s



d Sclerodermasid eukalüptide inokuleerimiseks mitte kasutada suure riski tõttu

d mood vaid 10% biomassist ja mütseeli iga on seega 50a. Obs, et müts elab talve vabalt üle. Arv et kliimasoojenemisega arkt tundrad muutuvad samasemaks leeder

kuivades taastuvad aeglaselt

a Pisolithus. Taimekasvu ei mõj inokul ja kasv 20 näd

liütütilisele ja fenooloksidaasi aktiivsusele





r (kõik AUS seened). Lisaks Sebacina, Thelephora jt teadmata päritoluga seened. Lacc fraterna nakatab ka Cistaceae spp. Paljud kõdusaproovid on samuti kaasa tul

(äkki substraadi siledusest tingitud???)

õlemal juhul

zet

statud puutikkide eksponeerimine



na, kütteks ja ehituspuiduks. Kuivatavad maapinda ja stimul põlenguid

kanna P

umi (mürgine Laccariale), rohkem patogeenide kasvu inh tüüpe, rohkem EcM seente kasvu stimul tüüpe (laia spetsiifikaga, kitsa spetsiifikaga olid ektomükorisosfää

30 cm, eriti tüve suunas; homokaartionid ei kaota ristumisvõimet peale pikka seiamist

1 palju C seene kaudu (Ceph 85 procenti tihedas poogikus); Arv et eri taimede 15N soltub erityypi mykoriisadest;



nenemise tõttu nagu Koide2003 pakub

d

on ja Suillus piperatus ei mood ecm. Juurte juurde agaritüki panemine kiirendas seene veget kasvu



ühendite omastavusvõime

ega vähe tähtsust; Seletavad peremeestaime madalat 15N juures oleva glutamaadi süntetaasi fraktsioneerimisega. Glu-Gln liigub seene ja taime vahet pidevalt; Arv 1

s. Arv 5.1 miljonit, siiski jäävad 1.5 miljoni juurde

. Tulenes täpsest maakasutusest enne. Umbrohte eelnevalt ei hävitatud, vaid külvati taimed peale

sõltuvalt lahustavusest ja transp ef-st. Redoksreakts nullas  
gliukoosiga.

iidet kõik looduslikud uuringud on allokats EcMi ülehinnanud (15-21%)

√ rikkamad kui mitteMR juured => seenmaterjal on 3-11 promilli enam rikastunud vrd taimega. Arv et taimedevah erinevused tulenevad pigem juurdumissyg kui eri :

d saavad mullast eri yhendeid, pigem on tegu erineva juurdumissygavusega; N2 fikseerivatel taimedel pakub 5 promillist vehet kui kriteeriumi; tuleb valida oiged tau:







ned

ega pea tot; fotosünteesi mõj seene poolt; ükski AM-seen ei stimul kõigi taimeliikide kasvu; N, P konts ei pruugi korreleeruda biomassiga ega fitnessiga; kontroll-töö

! ja www funktsioneerimist



eotis: Suillusele mõju positiivne, Amanitale neg; Erinevused koloonia tiheduses ja läbimõõdus; ECM kolonisatsioon vähenes kõigil seentel

ekattuvusest: plotte 80 ja igast ca 6 proovi; bonferroni ei kasut!!!

õi 3 juuretippu analüüsid. 1 juhul juuretipp andis väga viletsa tulemuse; juuretippude eristamise intensiivsus vs ekstensiivsus. Palju proove ja 1 tipp annab sama tu

gosterooli sisaldus

se kuuluvad ka hüpvirulentsed isolaadid, mis filogeneetiliselt on sarnased 2-tuumaliste Ceratobasidiumite ühele harule (siiski Thanatephoruse sees); mõningate eran

sis kolonis. Mükoriisa teke männil vs kuusel 1a vs 2-3 a seemikutel

ned; EcM looduses vaid viljakehade all, mujal v harva; nakatab kõiki EcM taimi v.a. lepp; inokul jääb püsima põlengutel ja taimlates;

emal kui mitteMR taim. Erinevused isolaaditi RM moodustamises. Mitmekordsed erinevused kasvukiiruses  
aremad kui mitteMR taim. Efekt oli suuresti seotud seene risomorfide jämeduse ning müitseeli ulatusega

ntraalne tsütoplasmata hüüf

1. kas nt leiuef. Tuleb kaitsta ka inimhäiringutega kooslusi, sest mitmed liigid tahavad just seda

'ga



al kui maa all

, Pax, Hygroph olivaceo-albus. Koosluse koosseis muutub enne rohustu muutumist. Arv, et Euroopas on seente BD vähenemine samuti seotud N-ga  
iris (Lact theiogalus) ja vastupidi (Cortinarius spp.)

cats miner-mulda ja ühtlasi C liikumine mulda

ID

in ürgmetsas

sest, siis on tugev valik nende vastu. Uued seensümbiondid saavad seega kanda kinnitada uutel peremeestaimedel nagu AUS taimed



a saavad odavamalt toota ja arenevad paremad võimalused ekspordiks. Arenenud riikides võib subsiidiumide kaotamine olla pos või neg.

oofne toitumine värskest CO<sub>2</sub>-süsinikust või mikroobidest-mullaloomadest.

eltis, Juglans, tivedest kaugemal kui juhusl. Väidet peremehe efekt, ent võib-olla varise efekt

·nococumi ja morchella sklerootsiime palju tuha sees (tek enne põlengut); Morchella sklerootsiime palju ka lagupuidu juures, kus liiguvad närilised. Pakuvad, et ka telt liikidelt võib vaenlasi varsti juurde yulla





i sõltu mulla P-st (erin Gartlan 1986). Puude levik transektide kaupa. *Microberlinia*, *Tetraberlinia* spp, *Didelotia* kasvasid koos, samas kui *Anthonotha* ja *Uapaca* olid

ohundid domin, sealh korrel see juurte biomassiga; AM prod suurim kõrgete rohundite juurres rikkal pinnasel

le)

is kui lisa-glükoosi anti; saproobidel lisa-glükoos inh laguaktiivsust!

ivseid puid

õgujuure diam

tiivsust ja seeläbi mõjut taimede  $^{15}\text{N}$ ; arv et taimed on paremad indikaatorid kui muld; enrichment factor aitab mullahet õle saada;  $\text{NO}_3$  vs  $\text{N}$

laadides. Naucoria ja Hebeloma mood kumbki paar tugevalt toetatud klaadi; arv ei toimu seleksioon maasis ja maapeals vahevormide vastu; maasiseste vormide tekl

› praktikline

ig eri ressursidest). Stabiilseid isotoope peab rakendama koos otseste toiduratsiooni mõõtmistega. Tuleb tasandada ajalist ja ruumilist heterogeensust

sat maha, võimaldades jätkuvat invas.

tsist lagundatud org-ühenditele. Seente tegevuse tõttu polümeeride N sis väheneb ja rasklagunev org aine ladestub. Arv, et N depositsioon aitab ladestunud C õhku f



(suurendab) ning AM-seente kooslusi Aafrikas

kui kiirele orgaanika lagundajale

reeglina ei fasiliteeri ega inhibeeri invas, sest on kõikjal ja mittespets.; Aktinoriisetele ja EcM taimedel nt Männil jt vastupidi. Arv Pisolithus

cM puud

kohalikele seen- ja putukkahjuritele. Soovit pikemas perspektiivis asendada vähem invasiivsete liikidega või mitteviljuvate rassidega

It vama ja pma seened sarnased

ei tuvastatagi; Nii MAT+ kui MAT- genotüübid suudavad VK intits.

•delsöötmeel. C-rohkus söötmes ei mõjuta kasvukiirust

•h osakaalu; Proteaceae proteoidsed juured on v efektiivsed mfg N omastamisel mullast  
•oni

•US EcM taimed olid N-vaesemad, samas kui Aafrikas toimus ka taimedel N-rikastumine

d genotüübid võivad kohalikud välja tõrjuda või geneet modif. Invas seeneliikide identif on v keeruline sest 1 raske identif morf liigikonts jr, looduslik biogeo on väh

nus mossega

.sist.

: 1 vihmaper algul kui ujutusi veel pole 2 mütseel ronib mööda tüvesid üles 3 nematoode püüdvad anamorfid

eid on ka mitte-arb-rakkudes.

ne biomass kui org-mullas.

enid ja sümbiondid, männid reeglina mitte. Oht on geneetilise materjali segunemises ja hübriidide tekkes, mis võimaldab herbivooridel peremeesliigi vahetust



aitse peab hõlmama seene jaoks sobivate kasvukohtade kaitset

iga minN rikkusest. Arv et sygisene D13C vaheus viljakehades tuleneb madalast temp,niiskusest ja kiirgusest

enem. Spetsialiseerumine eri peremehele, peremehe eri kudedele, regiooniti. Heterotalsed vs homotalsed seemed eri intens mitesug tsüklitega  
a seemed võivad olla globaalse levikuga, ent selle taga võib olla inimtegevus

| kinni ja seetõttu need ei transpireerinud.

itaja kui maakasutuse intensiivistamine



uudetud rühma tuvastada

omin Cort, Tricholoma, Paxillus

ioonid

teksit

), N akumul väetamise ja metsaraie tagajärjel. Enim on biosfääri mõj maakasutuse muutus. U 50% maismaast on tugevasti modif inimese poolt. Muutused albeedos j:

3C tuleb kuuselt, mis on vähemuses vrd tammega. EMH biomass 4.8 -5.8 t/ha, samas juuri 7 -12.3 kg/ha. ECM seente ja saprotroofide eristamine PLFA 18: 6,9 jr vää

olest liigirikkad



ohud

biomassilt, ent EcM osakaal jäi 0.2 ja 0.5% vahele, ent sagedus oli suurim (20% proovidest); ei mõjutanud teiste seente liigirikkust; eri EmH

el juhul samas proovis 2 genotüüpi. Alleelid olid alati haploidsed SSCP järgi

10M seentel. *Collybia butyracea* ja *Clitopilus prunulus* on tüüp. saproobid; *Tricholoma* spp: väga kõrge 15N

















peaks rohkem kaduma













oitanede kontseerijana, apressoriumides.; tricyclazole inh melaniini sünteesi



netsadele ja kanarbikumaadele.







nud. Tõestatud N-poolkera seeni eukalüptide istandustest ei leitud. . EcM eukalüptid on v konkurentsuvõimelised kohalike puudega vrd. Arv et eosepanga kogunem











ri tüübid), vähem inh EcM teket, nihF ja natibiootikumide tootlikkus sama. Arv et bulk mulla B on reservuaar abilisi EcM seentele mitteMR staadiumi läbimiseks











urineerimine tõstab 15N kõrgele. Arv et N muutmise seene poolt omab samavõrd tähtsust kui N ülesvõtt ja N transform omab v tähtsat rolli transpordil niidistikust ki





N yh kasutamisest

staliigid;





tluste ja fitnessi mõõtmise probleemid







lemuse, mis poole vähem proove ja 2 tipp = 1/3 proove ja 3 tippu. Tuvastamata jäi igal juhul 16-23% liikidest. Jackknife1,2; bootstrap ECM puhul v viletasid. Domir

iditega ITS filogenees toetab AGsid



















hjustatud metsas sklerootsiumid võivad juurde tekkida, idaneda ja poolduda



I eraldi. 6 a jooksul suured muutused mull P-s.







H4 ülesvõtt vs 15N on uuringuti varieeruv!; regionaalses skaalas 15N sõltub mulla N rohkusest, mulla nitrifikats, N deposits;

kides ITS var ei muutunud





»aisata CO2 na

:jt agressiivsed tüved võivad muutuda ise invasiivseks kohalikule seenestikule; tahtlik mutualistide introducts on enamike sissetoodud taimeliil









uuritud, endemseid liike vähe teada, liigikonts jama. Arv barcoding aitab tuvastada invas liike. Arv need seened, mis on maapealsete viljakehadega ja levivad tuul



















a kõrbestumine. Pms inimasustus vähendab biodiversiteeti elukohtade hävitamise ja fragmenteerimisega

irsketest -5 kuud seisnud proovidest. Huumuses vahe palju suurem ehk saproobe palju rohkem



-liivaproovides biomass jäi 0 ja 5.6% vahele (keskm 2%) RT-PCR põhjal

















































ine on oluline eukalüptide muutumisel invas-ks.





















ibarasse



















Kandid EMH vs ECM v erinevad













































cide invasiivsust stimul; paljudes kohtades mutualistidel on unikaalne funktsioon







: või putukatega, on pot invas. Tuleb vältida inokul kõrge konkurentsivõimega seeni ja inokul kitsa peremehe-seeni, mis on kasulikud, hea kolonis-võimega, ent vähe













































































































































































se levikuvõimega ning madala pika-aj konkurentsivõimega
