# Supplementary material
Source: PubMed Central journal article supplement (PMC4737927)
Supplement: ismej2015116x7.pdf [file ismej2015116x7.pdf]

Table S3. Best linear regression models of richness of soil biota.

| FINLAND                            |       |             |         | ESTONIA |                         |       |             |         |         |
|------------------------------------|-------|-------------|---------|---------|-------------------------|-------|-------------|---------|---------|
| variables                          | R2    | R2adj,cumul | F-value | P-value | variables               | R2    | R2adj,cumul | F-value | P-value |
| <b>1 Fungi richness</b>            |       |             |         |         |                         |       |             |         |         |
| Herb cover                         | 0.307 | 0.289       | 17.30   | 0.001   | <i>P. sylvestris</i> BA | 0.644 | 0.634       | -63.29  | <0.001  |
| Tree BA                            | 0.119 | 0.397       | -7.92   | 0.007   | Tree richness           | 0.152 | 0.783       | 25.21   | <0.001  |
| Understorey richness               | 0.089 | 0.476       | 6.80    | 0.014   | <i>P. tremula</i> BA    | 0.027 | 0.806       | 4.99    | 0.036   |
| Soil C/N ratio                     | 0.045 | 0.512       | -3.73   | 0.058   | Proportion of EcM trees | 0.019 | 0.822       | -3.93   | 0.042   |
| <i>P. sylvestris</i> BA            | 0.040 | 0.544       | 3.50    | 0.073   |                         |       |             |         |         |
| <b>1.1 EcM fungi richness</b>      |       |             |         |         |                         |       |             |         |         |
| <i>A. glutinosa</i> BA             | 0.272 | 0.254       | -14.60  | 0.003   | <i>P. sylvestris</i> BA | 0.535 | 0.522       | -40.28  | <0.001  |
| Soil pH(KCl)                       | 0.225 | 0.471       | 16.98   | 0.001   | <i>A. glutinosa</i> BA  | 0.116 | 0.631       | -11.35  | 0.003   |
| Tree diversity (Shannon index)     | 0.131 | 0.598       | 13.05   | 0.002   | Understorey richness    | 0.045 | 0.669       | 4.93    | 0.031   |
| <i>P. abies</i> BA                 | 0.028 | 0.618       | 2.94    | 0.109   | Soil Ca concentration   | 0.048 | 0.713       | 5.99    | 0.019   |
| Soil P concentration               | 0.019 | 0.629       | -2.04   | 0.161   |                         |       |             |         |         |
| PCNM1                              | 0.056 | 0.684       | 7.12    | 0.018   |                         |       |             |         |         |
| <b>1.2 Mycoparasite richness</b>   |       |             |         |         |                         |       |             |         |         |
| PCNM1                              | 0.233 | 0.213       | 11.82   | 0.001   | Soil pH(KCl)            | 0.075 | 0.048       | -2.83   | 0.084   |
| <i>L. sibirica</i> BA              | 0.048 | 0.242       | -2.51   | 0.108   | Proportion of EcM trees | 0.072 | 0.096       | -2.86   | 0.106   |
| Herb cover                         | 0.073 | 0.300       | 4.15    | 0.059   |                         |       |             |         |         |
| <b>1.3 Plant pathogen richness</b> |       |             |         |         |                         |       |             |         |         |
| Herb cover                         | 0.436 | 0.422       | 30.16   | <0.001  | Soil C/N ratio          | 0.637 | 0.627       | -61.47  | <0.001  |
| Soil C/N ratio                     | 0.123 | 0.536       | -10.61  | 0.002   | Proportion of EcM trees | 0.092 | 0.713       | -11.47  | 0.004   |
| PCNM1                              | 0.025 | 0.550       | 2.22    | 0.156   | <i>P. tremula</i> BA    | 0.014 | 0.719       | 1.79    | 0.197   |
| Soil N concentration               | 0.044 | 0.587       | 4.25    | 0.041   | Soil pH(KCl)            | 0.018 | 0.731       | 2.40    | 0.136   |
| Coppice amount                     | 0.023 | 0.601       | -2.27   | 0.159   | Tree BA                 | 0.027 | 0.754       | -3.98   | 0.060   |
| Tree BA                            | 0.049 | 0.647       | -5.53   | 0.023   | PCNM1                   | 0.025 | 0.775       | 4.00    | 0.068   |
| <b>1.4 Saprotroph richness</b>     |       |             |         |         |                         |       |             |         |         |
| Tree BA                            | 0.319 | 0.301       | -18.25  | 0.001   | Tree richness           | 0.422 | 0.406       | 25.60   | <0.001  |
| Soil N concentration               | 0.099 | 0.387       | 6.45    | 0.021   | <i>P. sylvestris</i> BA | 0.106 | 0.501       | -7.67   | 0.017   |
| <i>P. abies</i> BA                 | 0.123 | 0.504       | -9.94   | 0.004   | Soil pH(KCl)            | 0.044 | 0.534       | -3.38   | 0.070   |
| Soil C/N ratio                     | 0.060 | 0.556       | -5.37   | 0.020   | Soil Ca concentration   | 0.064 | 0.591       | 5.63    | 0.033   |
| <i>P. sylvestris</i> BA            | 0.033 | 0.581       | 3.13    | 0.085   |                         |       |             |         |         |

**2 Cercozoa richness**

|                      |       |       |      |       |                         |       |       |        |       |
|----------------------|-------|-------|------|-------|-------------------------|-------|-------|--------|-------|
| Herb cover           | 0.183 | 0.162 | 8.72 | 0.006 | Soil C/N ratio          | 0.337 | 0.318 | -17.75 | 0.001 |
| Soil pH(KCl)         | 0.163 | 0.311 | 9.46 | 0.010 | Soil Ca concentration   | 0.162 | 0.469 | -10.94 | 0.003 |
| Tree BA              | 0.095 | 0.395 | 6.26 | 0.018 | <i>P. sylvestris</i> BA | 0.100 | 0.561 | 8.21   | 0.009 |
| Coppice amount       | 0.055 | 0.439 | 4.78 | 0.040 |                         |       |       |        |       |
| <i>B. pendula</i> BA | 0.054 | 0.489 | 4.26 | 0.044 |                         |       |       |        |       |
| PCNM1                | 0.058 | 0.442 | 4.15 | 0.052 |                         |       |       |        |       |

**3 Chlorophyta richness**

|                    |       |       |        |        |                        |       |       |       |       |
|--------------------|-------|-------|--------|--------|------------------------|-------|-------|-------|-------|
| Tree BA            | 0.351 | 0.335 | -21.12 | <0.001 | <i>A. glutinosa</i> BA | 0.134 | 0.109 | 5.41  | 0.022 |
| <i>P. abies</i> BA | 0.070 | 0.391 | 4.58   | 0.030  | Tree BA                | 0.096 | 0.184 | -4.24 | 0.049 |
| Soil C/N ratio     | 0.089 | 0.470 | -6.70  | 0.011  | PCNM1                  | 0.070 | 0.237 | 3.32  | 0.077 |
|                    |       |       |        |        | <i>P. tremula</i> BA   | 0.062 | 0.282 | 3.10  | 0.083 |
|                    |       |       |        |        | Soil Ca concentration  | 0.053 | 0.321 | 2.83  | 0.090 |

**4 Ciliophora richness**

|                      |       |       |       |        |                        |       |       |        |        |
|----------------------|-------|-------|-------|--------|------------------------|-------|-------|--------|--------|
| Coppice amount       | 0.455 | 0.441 | 32.57 | <0.001 | Soil Ca concentration  | 0.602 | 0.590 | 52.90  | <0.001 |
| Understorey richness | 0.131 | 0.564 | 12.05 | 0.004  | Soil C/N ratio         | 0.114 | 0.699 | -13.62 | 0.001  |
| Soil N concentration | 0.046 | 0.602 | 4.62  | 0.033  | Soil N concentration   | 0.083 | 0.780 | 13.53  | 0.003  |
| Tree richness        | 0.034 | 0.629 | 3.66  | 0.069  | <i>P. abies</i> BA     | 0.021 | 0.797 | 3.81   | 0.054  |
| Herb cover           | 0.032 | 0.655 | 3.68  | 0.049  | <i>A. glutinosa</i> BA | 0.017 | 0.811 | -3.30  | 0.083  |

**5 Collembola richness**

|                |       |       |      |       |        |       |       |      |       |
|----------------|-------|-------|------|-------|--------|-------|-------|------|-------|
| Soil C/N ratio | 0.203 | 0.182 | 9.93 | 0.002 | PCNM12 | 0.179 | 0.155 | 7.62 | 0.008 |
| PCNM21         | 0.142 | 0.311 | 8.25 | 0.007 | PCNM1  | 0.149 | 0.288 | 7.55 | 0.006 |
| PCNM2          | 0.129 | 0.432 | 9.09 | 0.002 |        |       |       |      |       |

**6 Nematoda richness**

|                       |       |       |       |       |                      |       |       |       |       |
|-----------------------|-------|-------|-------|-------|----------------------|-------|-------|-------|-------|
| <i>L. sibirica</i> BA | 0.095 | 0.072 | 4.11  | 0.047 | Soil C/N ratio       | 0.209 | 0.196 | -9.64 | 0.003 |
| Coppice amount        | 0.071 | 0.122 | -3.23 | 0.072 | Soil P concentration | 0.055 | 0.220 | 2.04  | 0.153 |

**7 Total microbial biomass**

|                      |       |       |       |        |                      |       |       |       |       |
|----------------------|-------|-------|-------|--------|----------------------|-------|-------|-------|-------|
| PCNM1                | 0.681 | 0.672 | 83.07 | <0.001 | Soil P concentration | 0.292 | 0.273 | 14.51 | 0.001 |
| Soil P concentration | 0.048 | 0.714 | 6.70  | 0.018  | Soil C/N ratio       | 0.111 | 0.369 | -6.31 | 0.016 |

**8 Bacterial biomass**

|                      |       |       |       |        |                      |       |       |        |       |
|----------------------|-------|-------|-------|--------|----------------------|-------|-------|--------|-------|
| PCNM1                | 0.693 | 0.685 | 88.02 | <0.001 | Soil P concentration | 0.216 | 0.193 | 9.63   | 0.004 |
| Soil P concentration | 0.046 | 0.725 | 6.69  | 0.016  | Soil C/N ratio       | 0.185 | 0.365 | -10.49 | 0.003 |
|                      |       |       |       |        | Soil N concentration | 0.071 | 0.424 | 4.43   | 0.042 |

**8.1 Actinobacterial biomass**

|                      |       |       |       |        |                       |       |       |       |       |
|----------------------|-------|-------|-------|--------|-----------------------|-------|-------|-------|-------|
| Soil P concentration | 0.539 | 0.527 | 45.55 | <0.001 | A. glutinosa BA       | 0.292 | 0.272 | 14.43 | 0.001 |
| PCNM1                | 0.031 | 0.547 | 2.72  | 0.098  | Soil Ca concentration | 0.146 | 0.405 | 8.84  | 0.011 |
|                      |       |       |       |        | Soil C/N ratio        | 0.079 | 0.473 | -5.41 | 0.023 |

**9 Fungi biomass ergosterol**

|                      |       |       |       |        |                      |       |       |       |        |
|----------------------|-------|-------|-------|--------|----------------------|-------|-------|-------|--------|
| Soil N concentration | 0.653 | 0.644 | 73.29 | <0.001 | Soil N concentration | 0.677 | 0.668 | 73.46 | <0.001 |
| Soil P concentration | 0.130 | 0.772 | 22.83 | <0.001 | Carbon concentration | 0.090 | 0.754 | 13.17 | 0.005  |
| Understorey richness | 0.022 | 0.789 | 4.22  | 0.043  |                      |       |       |       |        |

**9.1 Saprotroph biomass ergosterol**

|                      |       |       |       |        |                       |       |       |       |        |
|----------------------|-------|-------|-------|--------|-----------------------|-------|-------|-------|--------|
| Soil N concentration | 0.635 | 0.626 | 67.94 | <0.001 | Soil N concentration  | 0.484 | 0.470 | 32.89 | <0.001 |
| Soil P concentration | 0.129 | 0.752 | 20.90 | <0.001 | P. sylvestris BA      | 0.042 | 0.498 | 2.99  | 0.091  |
| Understorey richness | 0.025 | 0.772 | 4.36  | 0.050  | Carbon concentration  | 0.085 | 0.576 | 7.20  | 0.013  |
|                      |       |       |       |        | Soil C/N ratio        | 0.046 | 0.614 | 4.28  | 0.047  |
|                      |       |       |       |        | Soil Ca concentration | 0.047 | 0.656 | 4.88  | 0.036  |

**9.2 EcM fungal biomass ergosterol**

|                      |       |       |        |        |                      |       |       |       |        |
|----------------------|-------|-------|--------|--------|----------------------|-------|-------|-------|--------|
| PCNM1                | 0.521 | 0.509 | 73.29  | <0.001 | Soil N concentration | 0.654 | 0.644 | 66.04 | <0.001 |
| A. glutinosa BA      | 0.085 | 0.586 | -22.83 | <0.001 | P. sylvestris BA     | 0.089 | 0.728 | 11.78 | 0.003  |
| Soil N concentration | 0.050 | 0.628 | 4.22   | 0.043  |                      |       |       |       |        |

**10 Bacteria to fungi ratio**

|                      |       |       |        |       |                       |       |       |        |        |
|----------------------|-------|-------|--------|-------|-----------------------|-------|-------|--------|--------|
| Soil N concentration | 0.261 | 0.242 | -13.77 | 0.002 | Soil C/N ratio        | 0.624 | 0.613 | -58.02 | <0.001 |
|                      |       |       |        |       | Soil Ca concentration | 0.083 | 0.690 | 9.67   | 0.003  |

**11 SAP to EcM fungi ratio**

|                                |       |       |       |        |                       |       |       |        |       |
|--------------------------------|-------|-------|-------|--------|-----------------------|-------|-------|--------|-------|
| A. glutinosa BA                | 0.376 | 0.360 | 23.48 | <0.001 | A. glutinosa BA       | 0.129 | 0.104 | 5.19   | 0.030 |
| Tree diversity (Shannon index) | 0.114 | 0.463 | 8.46  | 0.014  | Soil Ca concentration | 0.265 | 0.358 | -14.85 | 0.001 |
|                                |       |       |       |        | P. sylvestris BA      | 0.071 | 0.417 | 4.44   | 0.047 |
