# Supplementary material
Source: PubMed Central journal article supplement (PMC4737927)
Supplement: ismej2015116x9.pdf [file ismej2015116x9.pdf]

Table S5. Best multivariate models for community composition of soil biota.

| FINLAND                             |       |             |         |         | ESTONIA               |       |             |         |         |
|-------------------------------------|-------|-------------|---------|---------|-----------------------|-------|-------------|---------|---------|
| variables                           | R2    | R2adj,cumul | F-value | P-value | variables             | R2    | R2adj,cumul | F-value | P-value |
| <b>1 Fungi community</b>            |       |             |         |         |                       |       |             |         |         |
| PCNM1                               | 0.172 | 0.151       | 8.09    | <0.001  | Soil C/N ratio        | 0.168 | 0.144       | 7.08    | <0.001  |
| B. pendula BA                       | 0.051 | 0.182       | 2.50    | 0.001   | Soil Ca concentration | 0.086 | 0.210       | 3.90    | 0.001   |
| Soil Mg concentration               | 0.049 | 0.213       | 2.49    | 0.001   | T. cordata BA         | 0.051 | 0.242       | 2.42    | 0.001   |
| <b>1.1 EcM fungi community</b>      |       |             |         |         |                       |       |             |         |         |
| PCNM1                               | 0.100 | 0.076       | 4.31    | 0.001   | Ericoid cover         | 0.135 | 0.110       | 5.44    | <0.001  |
| B. pendula BA                       | 0.093 | 0.150       | 4.37    | 0.001   | Soil Ca concentration | 0.065 | 0.153       | 2.77    | 0.001   |
| Tree BA                             | 0.051 | 0.182       | 2.49    | 0.001   | T. cordata BA         | 0.053 | 0.185       | 2.33    | 0.001   |
| P. abies BA                         | 0.053 | 0.218       | 2.69    | 0.001   |                       |       |             |         |         |
| <b>1.2 Mycoparasite community</b>   |       |             |         |         |                       |       |             |         |         |
| Soil Mg concentration               | 0.102 | 0.079       | 4.44    | 0.001   | Soil N concentration  | 0.079 | 0.053       | 3.01    | 0.003   |
| PCNM5                               | 0.050 | 0.107       | 2.24    | 0.014   | Soil Ca concentration | 0.062 | 0.091       | 2.47    | 0.009   |
|                                     |       |             |         |         | Soil pH(KCl)          | 0.062 | 0.131       | 2.56    | 0.014   |
|                                     |       |             |         |         | PCNM17                | 0.069 | 0.181       | 3.04    | 0.007   |
| <b>1.3 Plant pathogen community</b> |       |             |         |         |                       |       |             |         |         |
| PCNM1                               | 0.095 | 0.072       | 4.10    | 0.001   | Soil N concentration  | 0.133 | 0.108       | 5.37    | <0.001  |
| L. sibirica BA                      | 0.045 | 0.094       | 1.97    | 0.001   | Soil Ca concentration | 0.089 | 0.176       | 3.87    | 0.001   |
| <b>1.4 Saprotroph community</b>     |       |             |         |         |                       |       |             |         |         |
| PCNM1                               | 0.227 | 0.207       | 11.47   | <0.001  | Soil C/N ratio        | 0.204 | 0.181       | 8.96    | <0.001  |
| Soil Mg concentration               | 0.051 | 0.240       | 2.68    | 0.001   | Soil N concentration  | 0.088 | 0.250       | 4.20    | 0.001   |
|                                     |       |             |         |         | Soil pH(KCl)          | 0.079 | 0.313       | 4.12    | 0.001   |
| <b>2. Cercozoa community</b>        |       |             |         |         |                       |       |             |         |         |
| Soil pH(KCl)                        | 0.079 | 0.055       | 3.33    | 0.001   | Soil pH(KCl)          | 0.122 | 0.097       | 4.88    | 0.001   |
|                                     |       |             |         |         | Ericoid cover         | 0.062 | 0.137       | 2.60    | 0.001   |
| <b>3 Chlorophyta community</b>      |       |             |         |         |                       |       |             |         |         |
| PCNM1                               | 0.093 | 0.070       | 4.01    | 0.001   | Herb cover            | 0.076 | 0.048       | 2.71    | 0.001   |

**4 Ciliophora community**

|                       |       |       |      |        |               |       |       |      |        |
|-----------------------|-------|-------|------|--------|---------------|-------|-------|------|--------|
| Soil Ca concentration | 0.167 | 0.146 | 7.83 | <0.001 | Ericoid cover | 0.126 | 0.101 | 5.05 | <0.001 |
| Soil pH(KCl)          | 0.051 | 0.178 | 2.50 | 0.002  | Soil pH(KCl)  | 0.055 | 0.133 | 2.29 | 0.001  |
| PCNM5                 | 0.049 | 0.209 | 2.49 | 0.005  |               |       |       |      |        |
| PCNM6                 | 0.049 | 0.241 | 2.56 | 0.001  |               |       |       |      |        |

**5 Collembola community**

|       |       |       |      |       |               |       |       |      |       |
|-------|-------|-------|------|-------|---------------|-------|-------|------|-------|
| PCNM1 | 0.075 | 0.051 | 3.15 | 0.003 | Soil pH(KCl)  | 0.085 | 0.059 | 3.27 | 0.001 |
| PCNM5 | 0.058 | 0.087 | 2.38 | 0.014 | Ericoid cover | 0.079 | 0.104 | 2.75 | 0.001 |

**6 Nematoda community**

|                      |       |       |      |       |                      |       |       |      |       |
|----------------------|-------|-------|------|-------|----------------------|-------|-------|------|-------|
| Soil P concentration | 0.064 | 0.040 | 2.66 | 0.005 | Soil N concentration | 0.120 | 0.095 | 4.78 | 0.001 |
|                      |       |       |      |       | Soil pH(KCl)         | 0.067 | 0.140 | 2.81 | 0.001 |
|                      |       |       |      |       | P. tremula BA        | 0.063 | 0.182 | 2.78 | 0.001 |
|                      |       |       |      |       | T. cordata BA        | 0.056 | 0.220 | 2.59 | 0.001 |
